# Supplementary material for: Common genomic elements promote transcriptional and DNA replication roadblocks
Source: HighWire-hosted journal article supplement (doi:10.1101/gr.204776.116), 2016-08-18
Supplement: Supplemental_Fig_S3.pdf [file Supplemental_Fig_S3.pdf]

# Roy\_et\_al\_Supplemental\_Fig.S3

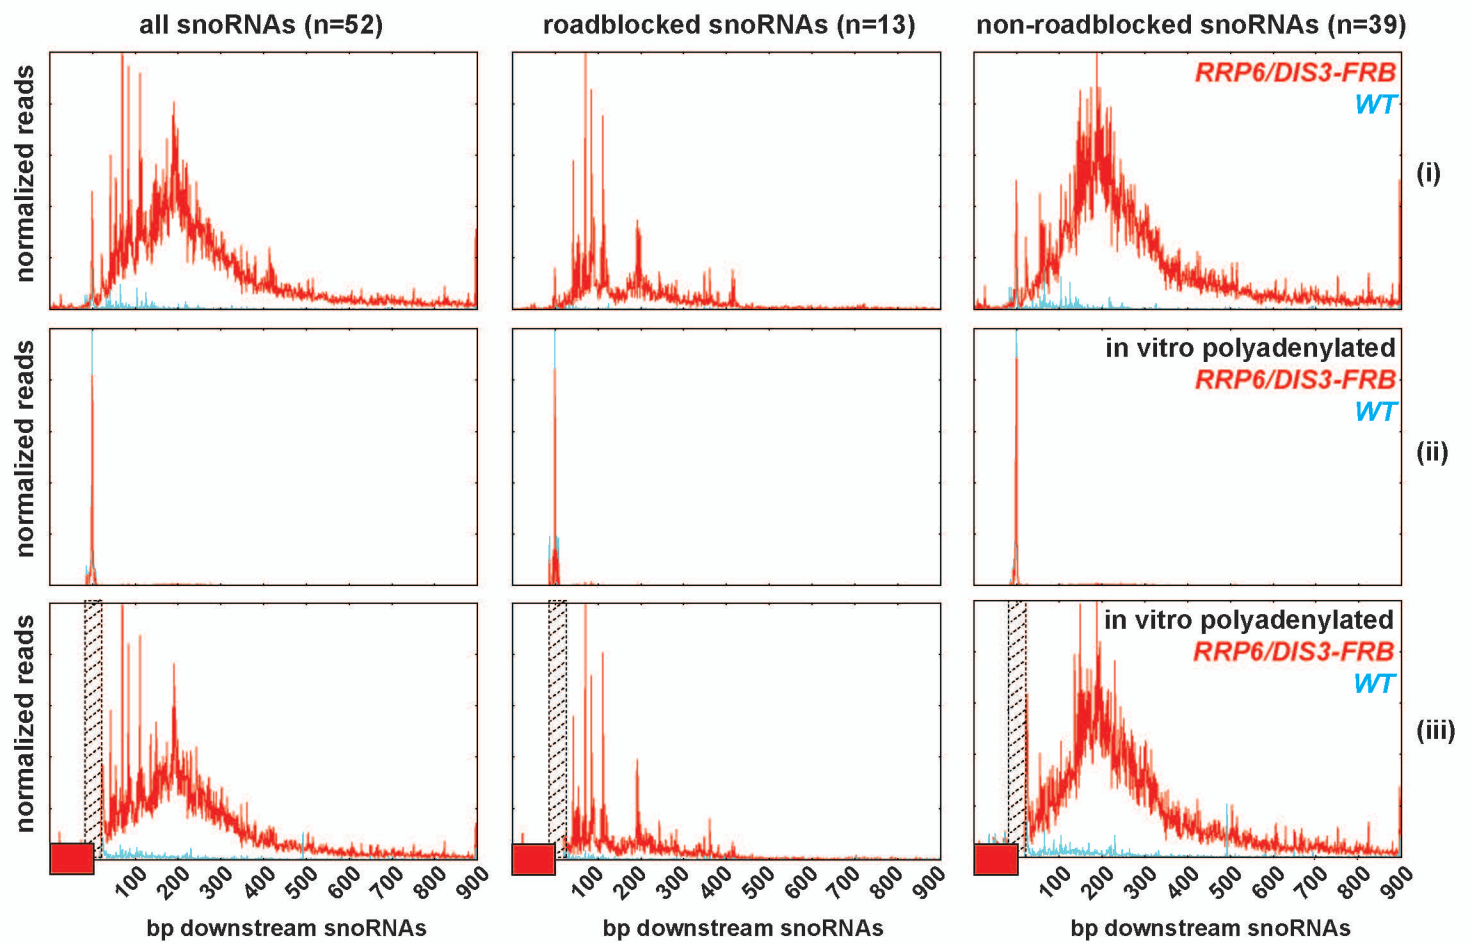

**Supplemental Figure S3. Meta-analysis of xPATs for roadblocked and non-roadblocked snoRNAs before and after *in vitro* polyadenylation, Related to Figure 2**

The xPAT signal for all snoRNAs undergoing NNS termination was normalized and aggregated for WT and *RRP6/DIS3-FRB* (panel (i)). Note that *RRP6/DIS3-FRB* signal dominates that of WT for the snoRNA termination region. Panel (ii) shows the same analysis after *in vitro* polyadenylation of total RNA (see Methods). Note the slightly increased levels of 3'-ends from mature snoRNAs in WT over *RRP6/DIS3-FRB*, consistent with unprocessed precursors accumulating in *RRP6/DIS3-FRB*. Panel (iii) shows *in vitro* polyadenylated PATs after removing the signal +/- 10 bp from the mature 3' ends. Note the similarity in the profile of xPATs for panels (i) and (iii).
