# Supplementary material for: Common genomic elements promote transcriptional and DNA replication roadblocks
Source: HighWire-hosted journal article supplement (doi:10.1101/gr.204776.116), 2016-08-18
Supplement: Supplemental_Fig_S5.pdf [file Supplemental_Fig_S5.pdf]

# Roy\_et\_al\_Supplemental\_Fig.S5

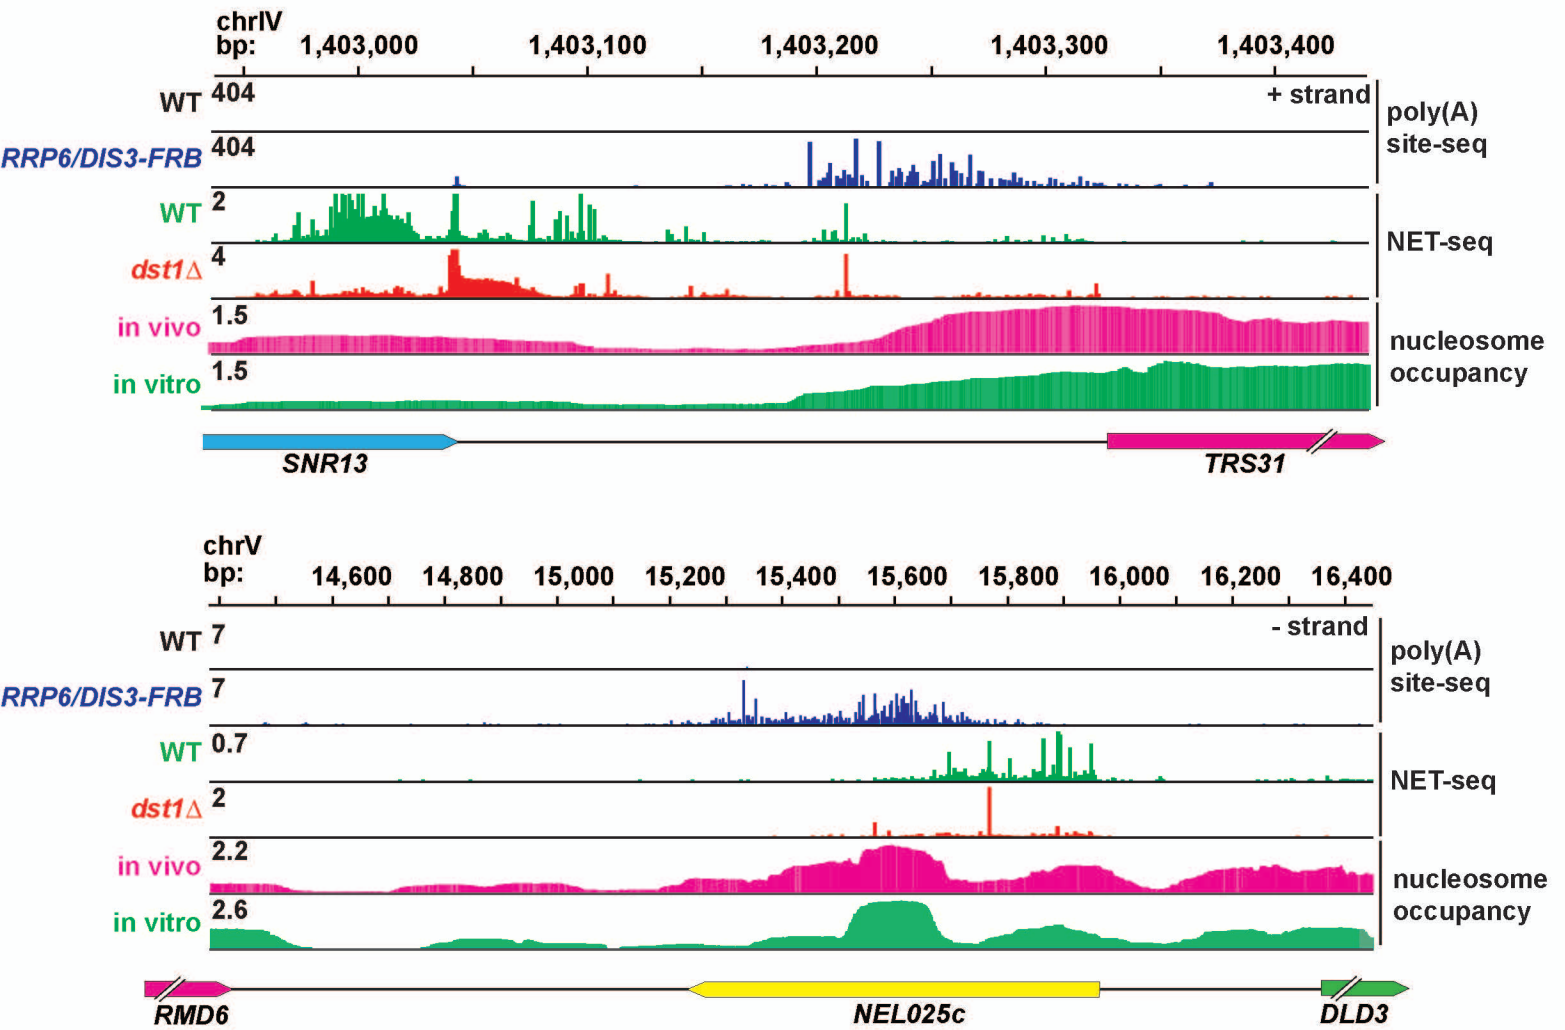

**Supplemental Figure S5. Correlation between non-roadblocked NNS termination sites and nucleosome occupancy, Related to Figures 2 and 3**

(A) Genome browser views are shown for regions encompassing the model NNS targets *SNR13* (+ strand, top panel) and *NEL025c* (- strand, bottom panel). PATs in WT and the *RRP6/ DIS3-FRB* strain, nascent 3' ends in WT and *dst1Δ*, and *in vivo* and *in vitro* nucleosome occupancies are shown (Churchman and Weissman 2011; Kaplan et al. 2009).
