# Supplementary material for: Common genomic elements promote transcriptional and DNA replication roadblocks
Source: HighWire-hosted journal article supplement (doi:10.1101/gr.204776.116), 2016-08-18
Supplement: Supplemental_Fig_S8.pdf [file Supplemental_Fig_S8.pdf]

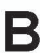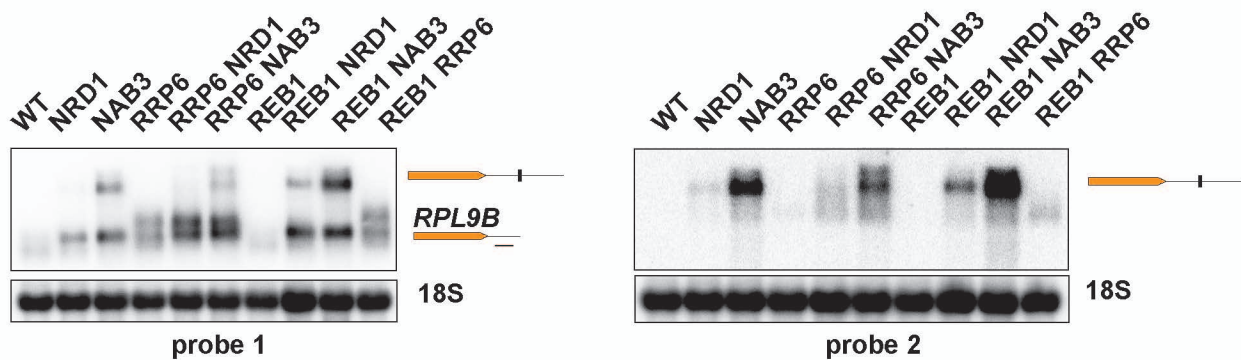

**Supplemental Figure S8. Control of RPL9B transcription termination by the NNS pathway and Reb1p, Related to Figure 4**

(A) Genome browser view of the *RPL9B* termination region. Tracks are shown as in **Supplemental Fig. S2**. 4-thio-uracil sequencing (4tU-seq) is from previously published data (Schulz et al. 2013). The relative positions of the Nrd1p and Nab3 motifs are indicated in the bottom tracks. The y-axis indicates reads per million for each dataset.

(B) Northern blot analysis of *RPL9B* upon nuclear depletion of Nrd1p, Nab3p, Rrp6p and/or Reb1p by anchor away. *RPL9B* transcripts were detected with a 3' UTR riboprobe upstream of the Reb1p binding site (left panel), or downstream of the Reb1p site (right panel). The regions targeted by the probe are shown in (A).
