# Supplementary material for: Common genomic elements promote transcriptional and DNA replication roadblocks
Source: HighWire-hosted journal article supplement (doi:10.1101/gr.204776.116), 2016-08-18
Supplement: Supplemental_Fig_S10.pdf [file Supplemental_Fig_S10.pdf]

# Roy\_et\_al\_Supplemental\_Fig.S10

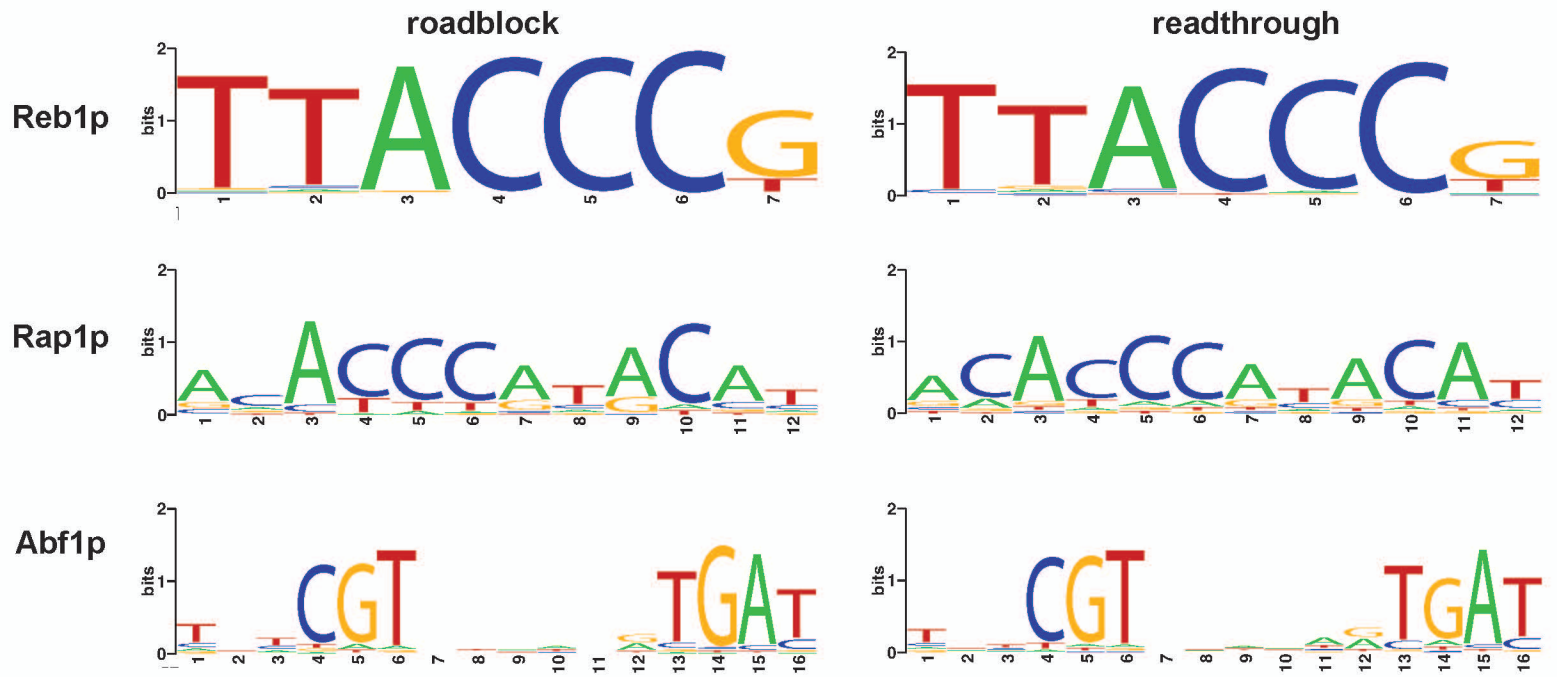

**Supplemental Figure S10. Meta-site analysis for Pol II occupancy and Okazaki fragment roadblocks for the general regulatory factors (GRFs) and non-GRF DNA-binding proteins, Related to Figure 5**

Motif logos for GRF sites resulting in Pol II roadblock (left) or Pol II readthrough (right) for the indicated GRFs. The complete list of GRF sites identified for each category is listed in **Supplemental Table S3**.
