# Supplementary material for: Common genomic elements promote transcriptional and DNA replication roadblocks
Source: HighWire-hosted journal article supplement (doi:10.1101/gr.204776.116), 2016-08-18
Supplement: Supplemental_Table_S1.xlsx [file Supplemental_Table_S1.xlsx]

## Sheet: rrp6_delta_QuantSeq
chromosome	peak coord	center of mass coordinate for cluster	strand	annotation type	gene name	gene ID	strandedness	cluster start	cluster end	cluster width	total cluster reads	peak height (reads)	width around peak accounting for 80.0% of signal	distinct number of three prime ends accounting for 80.0% of signal	fold upregulation
chrII	79908	79908	+	3UTR	INT_0_257	INT_0_257	antisense	79905	79975	70	14.5755	4.08114	58	19	2.1827
chrII	88302	88362	+	snoRNA_1000_nt_downstream	INT_0_265	INT_0_265	sense	88253	88569	316	1221.72	105.818	172	162	51.3697
chrII	137700	137700	+	intergenic_region	INT_0_302	INT_0_302	sense	137700	137701	1	2.04057	2.04057	-1	1	2.04057
chrII	169533	169522	+	intergenic_region	INT_0_327	INT_0_327	sense	169522	169533	11	27.1104	19.8227	2	3	2.78406
chrII	221065	221065	+	intergenic_region	INT_0_359	INT_0_359	sense	221062	221069	7	2.9151	2.33208	3	2	2.62359
chrII	235168	235161	+	3UTR	INT_0_361	INT_0_361	antisense	235149	235168	19	56.8445	39.0623	1	3	2.20317
chrII	235169	235169	+	3UTR	INT_0_361	INT_0_361	antisense	235169	235172	3	6.41322	2.62359	2	4	2.00452
chrII	254984	254984	+	CUTs	CUT009	ST0108	sense	254971	255055	84	27.6935	3.78963	44	27	2.6727
chrII	288827	288827	+	XUTs	XUT_2F-101	571608	sense	288827	288844	17	2.9151	2.04057	14	3	2.40543
chrII	290565	290565	+	3UTR	SCO2	YBR024W	sense	290565	290566	1	4.37265	4.08114	-1	1	4.08114
chrII	307044	307040	+	CUTs	CUT012	ST0122	sense	306978	307087	109	27.985	3.20661	40	24	25.3906
chrII	308053	308053	+	ncRNA	TLC1	TLC1	sense	308036	308061	25	7.87077	2.04057	16	8	7.57926
chrII	308855	308855	+	ncRNA	TLC1	TLC1	sense	308853	308920	67	18.3651	2.62359	48	24	3.31414
chrII	326609	326609	+	CUTs	CUT015	ST0129	sense	326608	326632	24	9.03681	3.49812	3	5	8.7453
chrII	344495	344476	+	3UTR	YRO2	YBR054W	sense	344476	344495	19	79.5822	61.8001	0	2	2.20317
chrII	344602	344576	+	3UTR	YRO2	YBR054W	sense	344551	344676	125	29.151	6.70473	70	25	2.11229
chrII	351919	351918	+	3UTR	YBR056W-A	YBR056W-A	sense	351918	351919	1	4.95567	2.9151	0	2	2.04057
chrII	366625	366630	+	CUTs	XUT_2F-146	571621	sense	366624	366679	55	18.6566	3.49812	32	18	12.0271
chrII	376547	376547	+	CUTs	CUT021	ST0143	sense	376444	376951	507	56.2614	2.33208	286	96	17.1053
chrII	395170	395170	+	3UTR	ECM33	YBR078W	sense	395170	395178	8	3.20661	2.33208	7	2	2.33208
chrII	395366	395366	+	intergenic_region	INT_0_500	INT_0_500	sense	395366	395386	20	13.4095	4.08114	10	9	2.00452
chrII	408081	408081	+	intergenic_region	XUT_2F-169	571628	sense	408081	408125	44	7.87077	4.08114	5	6	7.57926
chrII	414203	414203	+	antisense_CDS	INT_0_512	INT_0_512	sense	414201	414223	22	5.8302	2.62359	2	4	5.53869
chrII	423723	423716	+	CUTs	CUT024	ST0154	sense	423608	423939	331	113.106	5.8302	132	90	43.0972
chrII	431687	431687	+	CUTs	XUT_2F-177	571630	sense	431618	431755	137	15.7415	6.12171	57	17	7.86961
chrII	434382	434381	+	3UTR	PBY1	YBR094W	sense	434382	434384	2	6.12171	2.62359	0	2	2.83974
chrII	453591	453593	+	SUTs	SUT017	ST0164	sense	453591	453677	86	17.1991	4.08114	11	8	3.87541
chrII	453831	453827	+	SUTs	SUT017	ST0164	sense	453809	453882	73	11.0774	2.62359	33	11	10.7859
chrII	479376	479376	+	intron	YBR119W_intron	intergenic	sense	479376	479411	35	8.16228	3.49812	15	7	4.00904
chrII	483966	483966	+	CUTs	CUT026	ST0172	sense	483965	484157	192	33.5237	2.04057	139	56	33.2321
chrII	513681	513680	+	3UTR	YBR137W	YBR137W	sense	513680	513681	1	9.32832	6.70473	0	2	2.62359
chrII	554421	554421	+	SUTs	SUT020	ST0191	sense	554421	554452	31	3.78963	2.04057	20	5	3.49812
chrII	561093	561093	+	3UTR	CDC28	YBR160W	sense	561093	561104	11	2.9151	2.04057	4	2	2.00452
chrII	565539	565594	+	3UTR	YSY6	YBR162W-A	sense	565538	565637	99	27.4019	2.33208	63	29	2.70175
chrII	573821	573821	+	3UTR	PEX32	YBR168W	sense	573814	573822	8	2.33208	2.04057	-1	1	2.33208
chrII	582272	582272	+	5UTR	SWD3	YBR175W	sense	582251	582291	40	8.45379	3.49812	24	7	8.16228
chrII	596118	596083	+	CDS	YPC1	YBR183W	sense	596042	596235	193	67.9218	8.45379	102	51	2.6274
chrII	614877	614881	+	CUTs	XUT_2F-242	571637	sense	614838	614938	100	44.601	9.03681	56	33	11.9485
chrII	716520	716520	+	intergenic_region	INT_0_731	INT_0_731	sense	716507	716531	24	4.66416	2.33208	4	4	4.37265
chrII	762559	762559	+	CDS	PAF1	YBR279W	sense	762559	762560	1	2.04057	2.04057	-1	1	2.04057
chrII	771782	771782	+	CDS	YBR284W	YBR284W	sense	771753	771792	39	7.57926	2.04057	29	10	7.28775
chrII	773794	773794	+	5UTR	INT_0_778	INT_0_778	sense	773793	773823	30	10.2029	2.33208	25	11	4.13053
chrII	778173	778173	+	antisense_CDS	INT_0_782	INT_0_782	sense	778173	778182	9	3.78963	2.04057	4	2	3.49812
chrII	779298	779284	+	antisense_CDS	INT_0_782	INT_0_782	sense	779242	779375	133	20.9887	3.78963	81	18	6.32538
chrII	782826	782826	+	CDS	BSD2	YBR290W	sense	782826	782832	6	8.16228	4.37265	3	2	3.60814
chrII	802165	802158	+	3UTR	MAL33	YBR297W	sense	802152	802167	15	27.6935	10.7859	6	7	2.90656
chrXIII	13811	13852	+	SUTs	XUT_13F-3	572694	sense	13547	14117	570	116.021	3.78963	348	164	13.2633
chrXIII	30370	30370	+	SUTs	SUT286	ST2423	sense	30342	30384	42	17.4906	4.08114	11	11	17.1991
chrXIII	92023	92022	+	intergenic_region	INT_0_6334	INT_0_6334	sense	92007	92075	68	34.3982	4.66416	12	13	26.0588
chrXIII	159970	159970	+	3UTR	SML1	YML058W	sense	159970	159976	6	4.08114	2.62359	4	3	2.48179
chrXIII	162190	162190	+	intergenic_region	INT_0_6385	INT_0_6385	sense	162190	162195	5	3.20661	2.33208	2	2	2.9151
chrXIII	164727	164727	+	5UTR	SUT294	ST2468	sense	164667	164877	210	20.1142	2.04057	134	30	19.8227
chrXIII	169001	169001	+	intergenic_region	INT_0_6392	INT_0_6392	sense	169001	169057	56	7.87077	2.04057	38	10	2.04383
chrXIII	206337	206334	+	3UTR	CGI121	YML036W	sense	206334	206337	3	11.3689	8.45379	2	2	2.9151
chrXIII	239221	239221	+	3UTR	PSP2	YML017W	sense	239206	239239	33	9.61983	3.78963	10	5	3.88756
chrXIII	242444	242440	+	XUTs	XUT_13F-106	572710	sense	242369	242560	191	31.7746	2.9151	93	39	14.4326
chrXIII	242866	242867	+	antisense_CDS	INT_0_6440	INT_0_6440	sense	242845	242993	148	28.8595	4.66416	80	30	26.1924
chrXIII	253524	253524	+	SUTs	SUT296	ST2498	sense	253494	253537	43	7.57926	2.62359	25	9	7.28775
chrXIII	272912	272910	+	3UTR	MIC17	YMR002W	sense	272910	272912	2	9.91134	7.28775	1	3	2.00452
chrXIII	275692	275692	+	3UTR	MVP1	YMR004W	sense	275686	275693	7	11.9519	5.8302	0	2	5.87993
chrXIII	290733	290733	+	tRNA_100_nt_upstream	INT_0_6483	INT_0_6483	sense	290733	290737	4	4.66416	2.33208	1	2	4.00904
chrXIII	297176	297174	+	snoRNA_300_nt_upstream	SUT298	ST2513	sense	297167	297193	26	32.0661	14.867	13	11	16.1847
chrXIII	297428	297426	+	snoRNA_1000_nt_downstream	INT_0_6488	INT_0_6488	sense	297280	297448	168	412.778	119.519	13	15	72.6768
chrXIII	297646	297634	+	snoRNA_1000_nt_downstream	YMR013W-A	YMR013W-A	sense	297586	297700	114	1646.45	541.626	57	53	50.309
chrXIII	297850	297864	+	snoRNA_1000_nt_downstream	YMR013W-A	YMR013W-A	sense	297814	297941	127	1111.82	382.17	29	29	74.9338
chrXIII	298001	298008	+	snoRNA	YMR013W-A	YMR013W-A	sense	298000	298086	86	138.467	32.3576	29	27	11.9515
chrXIII	298248	298246	+	snoRNA_1000_nt_downstream	YMR013W-A	YMR013W-A	sense	298218	298265	47	117.187	45.4756	11	9	44.6563
chrXIII	298409	298452	+	snoRNA	SNR73	snR73	sense	298407	298521	114	2491.54	404.033	69	70	79.3085
chrXIII	298669	298688	+	snoRNA_1000_nt_downstream	YMR013W-A	YMR013W-A	sense	298599	298871	272	211.053	29.151	43	42	15.0966
chrXIII	349599	349595	+	intergenic_region	INT_0_6530	INT_0_6530	sense	349560	349654	94	13.9925	2.9151	54	12	13.118
chrXIII	362999	362999	+	tRNA_100_nt_upstream	INT_0_6541	INT_0_6541	sense	362964	363015	51	21.2802	5.24718	20	14	20.6972
chrXIII	363317	363317	+	intergenic_region	INT_0_6542	INT_0_6542	sense	363317	363319	2	4.37265	3.49812	1	2	3.49812
chrXIII	391587	391586	+	3UTR	SEN15	YMR059W	sense	391586	391587	1	16.6161	14.284	-1	1	2.33208
chrXIII	426395	426395	+	3UTR	SEC14	YMR079W	sense	426395	426405	10	3.78963	2.33208	9	4	2.6727
chrXIII	455663	455657	+	3UTR	INT_0_6611	INT_0_6611	sense	455657	455663	6	44.8925	23.6123	4	6	2.16785
chrXIII	459450	459446	+	3UTR	SNZ1	YMR096W	sense	459446	459456	10	20.4057	12.2434	4	6	2.08222
chrXIII	459543	459543	+	3UTR	INT_0_6614	INT_0_6614	sense	459543	459546	3	3.49812	2.9151	-1	1	2.9151
chrXIII	463488	463488	+	tRNA_100_nt_upstream	INT_0_6617	INT_0_6617	sense	463486	463494	8	2.62359	2.04057	5	2	2.33208
chrXIII	466031	466031	+	5UTR	MUB1	YMR100W	sense	466024	466035	11	4.37265	2.9151	0	4	4.08114
chrXIII	481372	481368	+	XUTs	XUT_13F-209	572733	sense	481367	481392	25	14.284	5.8302	8	5	3.20724
chrXIII	501315	501315	+	CUTs	CUT300	ST2578	sense	501211	501509	298	41.1029	3.49812	214	69	11.0052
chrXIII	502001	502001	+	intergenic_region	INT_0_6645	INT_0_6645	sense	501950	502013	63	12.2434	4.08114	39	12	11.9519
chrXIII	512145	512144	+	SUTs	SUT307	ST2583	sense	512127	512162	35	9.03681	2.33208	22	11	6.68174
chrXIII	535678	535678	+	CUTs	CUT301	ST2591	sense	535617	535761	144	14.867	3.78963	78	16	11.1362
chrXIII	536089	536089	+	intergenic_region	INT_0_6670	INT_0_6670	sense	536084	536110	26	4.66416	2.33208	9	5	4.37265
chrXIII	557644	557644	+	CUTs	CUT303	ST2601	sense	557572	557972	400	54.8039	2.04057	297	108	49.9794
chrXIII	572773	572773	+	3UTR	MRPS8	YMR158W	sense	572773	572783	10	5.53869	3.78963	3	3	2.00452
chrXIII	623411	623543	+	5UTR	XUT_13F-274	572747	sense	623408	623544	136	16.0331	3.78963	94	19	2.82689
chrXIII	625699	625699	+	5UTR	YMR182W-A	YMR182W-A	sense	625675	625722	47	9.32832	3.49812	28	10	8.28536
chrXIII	626285	626301	+	snoRNA_300_nt_upstream	YMR182W-A	YMR182W-A	sense	626258	626335	77	67.3388	17.4906	36	23	21.9543
chrXIII	626793	626801	+	snoRNA_1000_nt_downstream	INT_0_6752	INT_0_6752	sense	626640	627081	441	509.559	28.568	198	145	29.9308
chrXIII	632028	632018	+	3UTR	YMR185W	YMR185W	sense	631990	632028	38	23.6123	11.9519	16	9	2.05592
chrXIII	652532	652519	+	snoRNA	SNR11	snR11	sense	652395	652532	137	62.6747	25.0699	31	17	2.73633
chrXIII	652858	652830	+	snoRNA_1000_nt_downstream	CUT306	ST2634	sense	652534	653193	659	889.397	17.1991	376	302	44.3028
chrXIII	653887	653887	+	XUTs	XUT_13F-286	572748	sense	653874	654137	263	20.4057	3.78963	175	31	3.54646
chrXIII	658507	658507	+	intergenic_region	INT_0_6775	INT_0_6775	sense	658507	658512	5	3.20661	2.04057	4	2	2.04057
chrXIII	675675	675674	+	intergenic_region	INT_0_6788	INT_0_6788	sense	675664	675861	197	32.9406	5.8302	147	32	5.34539
chrXIII	713912	713890	+	3UTR	ERG8	YMR220W	sense	713869	713912	43	31.4831	24.7784	1	2	2.56133
chrXIII	713918	713935	+	3UTR	ERG8	YMR220W	sense	713913	713952	39	29.4425	11.3689	19	14	2.9051
chrXIII	758952	758952	+	CDS	YMR245W	YMR245W	sense	758828	758985	157	9.61983	2.04057	108	18	9.32832
chrXIII	790122	790124	+	intergenic_region	INT_0_6864	INT_0_6864	sense	790116	790149	33	11.3689	3.78963	7	6	11.0774
chrXIII	857830	857830	+	CDS	JNM1	YMR294W	sense	857830	857831	1	2.04057	2.04057	-1	1	2.04057
chrXIII	870070	870069	+	intergenic_region	XUT_13F-373	572762	sense	870065	870077	12	7.57926	2.9151	6	6	6.12171
chrXIII	905748	905748	+	CDS	DIA1	YMR316W	sense	905748	905749	1	2.04057	2.04057	-1	1	2.04057
chrI	31570	31569	+	CDS	GDH3	YAL062W	sense	31570	31574	4	3.20661	2.33208	3	2	2.33208
chrI	42017	42017	+	3UTR	GPB2	YAL056W	sense	42017	42043	26	7.28775	4.37265	20	5	2.91567
chrI	48321	48317	+	3UTR	FLC2	YAL053W	sense	48317	48321	4	51.5973	44.8925	-1	1	2.56133
chrI	142493	142488	+	snoRNA_1000_nt_downstream	YAL003W_intron	intergenic	sense	142466	142512	46	2115.2	320.369	16	18	90.6094
chrI	142611	142604	+	snoRNA_1000_nt_downstream	YAL003W_intron	intergenic	sense	142538	142635	97	1112.11	178.696	28	30	72.7928
chrI	143244	143244	+	snoRNA_1000_nt_downstream	INT_0_151	INT_0_151	sense	143244	143245	1	2.9151	2.33208	0	2	2.33208
chrI	143587	143587	+	CUTs	CUT003	ST0035	sense	143587	143588	1	5.8302	5.24718	-1	1	5.24718
chrI	166203	166199	+	tRNA_100_nt_upstream	INT_0_160	INT_0_160	sense	166167	166203	36	39.9369	11.9519	7	8	27.985
chrVIII	64988	64973	+	antisense_CDS	INT_0_4063	INT_0_4063	sense	64973	65030	57	29.4425	12.8264	21	13	2.30405
chrVIII	115762	115780	+	CUTs	CUT173	ST1415	sense	115525	115862	337	48.3907	2.33208	180	68	20.0452
chrVIII	207330	207333	+	3UTR	FSH1	YHR049W	sense	207330	207361	31	61.5086	21.2802	6	8	2.14224
chrVIII	211000	210999	+	CDS	CIC1	YHR052W	sense	211000	211006	6	5.53869	2.62359	5	3	2.9151
chrVIII	258204	258204	+	3UTR	YHR078W	YHR078W	sense	258204	258229	25	6.99624	3.20661	17	6	2.79418
chrVIII	268211	268211	+	3UTR	LRP1	YHR081W	sense	268211	268213	2	4.08114	2.33208	1	3	2.62359
chrVIII	294271	294310	+	SUTs	XUT_8F-131	572242	sense	294219	294407	188	40.5199	2.33208	129	50	20.4907
chrVIII	353418	353418	+	3UTR	LSM12	YHR121W	sense	353418	353423	5	3.49812	2.04057	0	2	2.44997
chrVIII	358480	358445	+	3UTR	INT_0_4295	INT_0_4295	sense	358423	358480	57	34.1067	5.8302	38	21	2.64542
chrVIII	381752	381836	+	snoRNA_1000_nt_downstream	INT_0_4322	INT_0_4322	sense	381730	381948	218	1736.23	114.563	160	153	69.5253
chrVIII	381973	381982	+	snoRNA_1000_nt_downstream	INT_0_4322	INT_0_4322	sense	381970	382122	152	108.442	10.4944	49	46	108.15
chrVIII	384577	384577	+	3UTR	INT_0_4324	INT_0_4324	sense	384577	384582	5	3.20661	2.33208	0	2	2.22725
chrVIII	411136	411146	+	snoRNA_300_nt_upstream	LIN1	YHR156C	antisense	411123	411180	57	167.618	58.0105	31	25	40.3718
chrVIII	411341	411529	+	snoRNA_1000_nt_downstream	INT_0_4346	INT_0_4346	sense	411316	412452	1136	1459.59	82.4973	524	389	83.622
chrVIII	412794	412794	+	intergenic_region	INT_0_4347	INT_0_4347	sense	412763	412836	73	12.8264	6.99624	12	6	12.5349
chrVIII	413620	413620	+	3UTR	intergenic	intergenic	sense	413620	413647	27	2.9151	2.04057	9	3	2.62359
chrVIII	453901	453901	+	3UTR	YHR175W-A	YHR175W-A	sense	453901	453908	7	4.08114	2.33208	0	2	3.78963
chrVIII	492168	492168	+	CDS	UTP9	YHR196W	sense	492168	492180	12	5.24718	2.62359	5	2	4.95567
chrVIII	496457	496457	+	antisense_CDS	INT_0_4411	INT_0_4411	sense	496457	496479	22	3.20661	2.33208	5	2	2.9151
chrVIII	554365	554385	+	5UTR	IMD2	YHR216W	sense	554221	554554	333	1172.16	64.7152	71	71	19.3146
chrVIII	555610	555610	+	CDS	IMD2	YHR216W	sense	555610	555611	1	3.78963	3.78963	-1	1	3.78963
chrXV	10831	10831	+	intergenic_region	INT_0_7568	INT_0_7568	sense	10829	10854	25	6.12171	2.33208	4	4	5.8302
chrXV	16830	16830	+	XUTs	XUT_15F-6	572944	sense	16830	16858	28	5.8302	3.49812	7	5	3.62723
chrXV	18673	18700	+	XUTs	XUT_15F-9	572945	sense	18549	18787	238	35.8557	4.66416	88	28	4.29038
chrXV	33479	33479	+	XUTs	XUT_15F-18	572948	sense	33479	33497	18	4.66416	2.33208	8	6	2.22725
chrXV	33523	33609	+	XUTs	XUT_15F-18	572948	sense	33499	33731	232	46.9331	2.62359	144	62	3.28947
chrXV	33836	33836	+	SUTs	XUT_15F-18	572948	sense	33836	33837	1	4.37265	2.62359	0	2	2.62359
chrXV	49538	49538	+	3UTR	PSF3	YOL146W	sense	49537	49553	16	3.49812	2.04057	3	3	3.20661
chrXV	88046	88046	+	CDS	HRP1	YOL123W	sense	88036	88103	67	16.3246	3.20661	41	16	6.56025
chrXV	97257	97290	+	intergenic_region	INT_0_7638	INT_0_7638	sense	97255	97467	212	59.468	12.5349	106	51	4.23873
chrXV	106385	106382	+	3UTR	SKM1	YOL113W	sense	106357	106385	28	84.2464	56.2614	3	5	2.6727
chrXV	128408	128408	+	CUTs	CUT356	ST3009	sense	128371	128525	154	15.7415	4.08114	96	19	15.45
chrXV	136395	136395	+	CDS	YOL097W-A	YOL097W-A	sense	136345	136459	114	15.7415	2.33208	63	24	15.45
chrXV	143918	143918	+	3UTR	TRM10	YOL093W	sense	143903	143919	16	6.12171	4.37265	8	2	5.34539
chrXV	161224	161222	+	5UTR	INT_0_7686	INT_0_7686	sense	161221	161261	40	16.9076	4.66416	16	11	16.6161
chrXV	189289	189289	+	CDS	MDM20	YOL076W	sense	189289	189290	1	3.49812	3.49812	-1	1	3.49812
chrXV	234294	234293	+	snoRNA_300_nt_upstream	INT_0_7738	INT_0_7738	sense	234265	234301	36	13.701	6.41322	5	7	13.4095
chrXV	234555	234568	+	snoRNA_1000_nt_downstream	INT_0_7741	INT_0_7741	sense	234519	234947	428	1187.9	508.393	71	69	97.2193
chrXV	259196	259186	+	snoRNA_300_nt_upstream	YOL036W	YOL036W	sense	259178	259196	18	13.118	5.53869	13	7	3.4745
chrXV	259412	259420	+	snoRNA_300_nt_upstream	INT_0_7762	INT_0_7762	sense	259408	259458	50	69.0879	16.9076	33	18	28.6707
chrXV	259579	259683	+	snoRNA_1000_nt_downstream	SNR50	snR50	sense	259539	260047	508	482.158	53.3463	277	185	42.4804
chrXV	269762	269762	+	3UTR	GAS5	YOL030W	sense	269759	269768	9	3.49812	2.62359	5	2	2.9151
chrXV	274845	274864	+	tRNA_100_nt_downstream	INT_0_7773	INT_0_7773	sense	274822	274993	171	139.633	18.6566	88	56	91.2535
chrXV	282098	282098	+	tRNA_100_nt_upstream	XUT_15F-129	572963	sense	282098	282114	16	8.45379	5.24718	4	6	8.16228
chrXV	301180	301180	+	tRNA	YOL013W-A	YOL013W-A	sense	301163	301200	37	18.6566	2.62359	21	20	11.6453
chrXV	301339	301337	+	intergenic_region	INT_0_7792	INT_0_7792	sense	301337	301341	4	12.5349	3.49812	2	4	2.53906
chrXV	316314	316310	+	CUTs	CUT368	ST3076	sense	316275	316325	50	21.5717	4.08114	18	13	20.6972
chrXV	331473	331473	+	3UTR	YSP3	YOR003W	sense	331432	331479	47	15.45	5.53869	23	8	2.89542
chrXV	345929	345940	+	3UTR	TIR4	YOR009W	sense	345927	345948	21	36.1472	9.91134	16	11	4.32555
chrXV	392523	392535	+	3UTR	YOR032W-A	YOR032W-A	sense	392389	392737	348	72.2945	4.95567	176	97	16.5039
chrXV	427833	427834	+	CDS	YOR053W	YOR053W	sense	427811	427845	34	37.0218	19.2397	22	13	2.7158
chrXV	427855	427855	+	CDS	YOR053W	YOR053W	sense	427855	427933	78	12.8264	7.28775	16	10	3.83086
chrXV	430200	430200	+	intergenic_region	INT_0_7905	INT_0_7905	sense	430200	430210	10	11.9519	3.49812	2	4	3.14435
chrXV	433454	433454	+	3UTR	SGT1	YOR057W	sense	433454	433496	42	4.37265	2.33208	38	4	2.07876
chrXV	438898	438896	+	intergenic_region	INT_0_7913	INT_0_7913	sense	438778	438955	177	55.3869	6.12171	74	43	7.1781
chrXV	463932	463932	+	intergenic_region	INT_0_7934	INT_0_7934	sense	463932	463973	41	6.12171	2.9151	32	8	3.81814
chrXV	487375	487374	+	tRNA_100_nt_upstream	INT_0_7950	INT_0_7950	sense	487367	487385	18	13.9925	3.20661	6	8	13.701
chrXV	494927	495012	+	3UTR	TMA46	YOR091W	sense	494905	495166	261	63.8407	3.49812	140	69	5.82648
chrXV	506804	506803	+	3UTR	RPS7A	YOR096W	sense	506802	506804	2	4.95567	2.33208	0	2	2.62359
chrXV	515242	515262	+	5UTR	RAS1	YOR101W	sense	515176	515432	256	71.7115	2.62359	136	80	71.42
chrXV	525006	525005	+	3UTR	LEU9	YOR108W	sense	525005	525006	1	16.9076	14.284	-1	1	2.62359
chrXV	552232	552232	+	3UTR	GCY1	YOR120W	sense	552232	552237	5	4.66416	3.20661	3	3	4.08114
chrXV	578396	578396	+	5UTR	BAG7	YOR134W	sense	578389	578401	12	2.62359	2.04057	4	2	2.33208
chrXV	578579	578582	+	CDS	BAG7	YOR134W	sense	578479	578756	277	46.6416	2.62359	167	72	10.5571
chrXV	618108	618108	+	XUTs	XUT_15F-288	572986	sense	618106	618141	35	3.20661	2.04057	20	3	2.9151
chrXV	643376	643376	+	3UTR	DDP1	YOR163W	sense	643376	643377	1	3.20661	2.04057	0	2	2.04057
chrXV	682173	682173	+	5UTR	INT_0_8097	INT_0_8097	sense	682173	682201	28	10.4944	5.24718	1	3	10.2029
chrXV	710133	710134	+	tRNA_100_nt_upstream	INT_0_8111	INT_0_8111	sense	710116	710163	47	13.9925	4.95567	11	8	13.701
chrXV	738831	738831	+	3UTR	RPB10	YOR210W	sense	738830	738832	2	4.95567	2.04057	1	3	3.49812
chrXV	758524	758408	+	CDS	ODC2	YOR222W	sense	758381	758552	171	19.5312	2.9151	123	28	2.6727
chrXV	780596	780583	+	snoRNA	SNR17A	snR17a	sense	780462	780649	187	211.636	53.3463	56	40	6.87129
chrXV	783391	783391	+	intergenic_region	INT_0_8166	INT_0_8166	sense	783385	783394	9	4.95567	3.20661	5	3	4.66416
chrXV	788892	788892	+	antisense_CDS	INT_0_8170	INT_0_8170	sense	788892	788935	43	19.8227	6.12171	18	11	2.2754
chrXV	798704	798704	+	antisense_CDS	INT_0_8176	INT_0_8176	sense	798704	798721	17	5.24718	2.04057	14	8	4.54358
chrXV	811546	811544	+	3UTR	CDC31	YOR257W	sense	811544	811546	2	8.45379	5.24718	1	3	3.20661
chrXV	811559	811556	+	3UTR	CDC31	YOR257W	sense	811556	811559	3	12.5349	9.32832	1	3	2.44997
chrXV	825343	825353	+	CUTs	CUT389	ST3246	sense	825340	825368	28	8.45379	2.62359	24	8	7.57926
chrXV	832609	832602	+	snoRNA_1000_nt_downstream	INT_0_8205	INT_0_8205	sense	832542	832905	363	1508.56	134.678	130	114	72.0236
chrXV	842622	842758	+	snoRNA_1000_nt_downstream	INT_0_8213	INT_0_8213	sense	842599	843074	475	2024.83	195.02	215	179	55.5745
chrXV	845007	845007	+	CUTs	CUT390	ST3254	sense	844999	845024	25	6.70473	2.62359	19	7	3.67496
chrXV	845127	845127	+	CUTs	CUT390	ST3254	sense	845050	845249	199	16.3246	2.04057	94	29	10.4999
chrXV	850210	850213	+	intergenic_region	INT_0_8223	INT_0_8223	sense	850205	850280	75	13.9925	2.33208	38	19	4.83141
chrXV	888008	888008	+	3UTR	ISW2	YOR304W	sense	887967	888051	84	14.284	3.49812	42	12	2.7889
chrXV	898938	898938	+	SUTs	SUT381	ST3273	sense	898935	899099	164	10.4944	2.33208	107	18	2.46169
chrXV	908294	908294	+	intergenic_region	SUT382	ST3275	sense	908264	908377	113	13.4095	3.78963	53	17	7.51696
chrXV	914047	914039	+	3UTR	HSH49	YOR319W	sense	914039	914074	35	11.3689	4.37265	19	8	3.90625
chrXV	918955	918955	+	antisense_CDS	INT_0_8273	INT_0_8273	sense	918931	918962	31	9.91134	2.33208	20	10	9.61983
chrXV	930814	930812	+	antisense_CDS	INT_0_8279	INT_0_8279	sense	930648	931017	369	71.42	4.37265	205	86	3.36154
chrXV	949634	949634	+	intergenic_region	INT_0_8290	INT_0_8290	sense	949631	949655	24	9.91134	3.49812	12	10	9.61983
chrXV	959178	959178	+	intergenic_region	INT_0_8296	INT_0_8296	sense	959165	959190	25	6.41322	2.9151	2	3	4.00904
chrXV	992864	992864	+	3UTR	CIN1	YOR349W	sense	992853	992897	44	9.91134	2.33208	17	6	3.14996
chrXV	992994	992990	+	3UTR	CIN1	YOR349W	sense	992986	992998	12	10.2029	3.78963	7	6	9.91134
chrXV	1025641	1025644	+	3UTR	YOR366W	YOR366W	sense	1025632	1025678	46	17.7821	5.24718	30	13	5.72721
chrXV	1057769	1057769	+	3UTR	YOR381W-A	YOR381W-A	sense	1057741	1057770	29	9.32832	2.62359	23	6	2.51548
chrIX	28197	28197	+	XUTs	XUT_9F-4	572304	sense	28191	28212	21	6.41322	2.04057	12	7	2.33861
chrIX	28588	28586	+	intergenic_region	INT_0_2200	INT_0_2200	sense	28430	28620	190	37.0218	10.4944	96	29	10.5237
chrIX	94851	94851	+	3UTR	OM45	YIL136W	sense	94851	94862	11	4.08114	2.33208	8	5	2.6727
chrIX	95010	95003	+	intergenic_region	INT_0_2244	INT_0_2244	sense	95003	95010	7	9.03681	4.95567	6	3	4.08114
chrIX	96976	96975	+	snoRNA_300_nt_upstream	INT_0_2244	INT_0_2244	sense	96959	97007	48	584.769	459.128	0	2	54.6812
chrIX	97247	97248	+	snoRNA_1000_nt_downstream	FLX1	YIL134W	sense	97238	97268	30	1826.02	639.864	20	15	85.469
chrIX	97302	97400	+	snoRNA_1000_nt_downstream	FLX1	YIL134W	sense	97289	97761	472	350.395	11.9519	215	169	106.997
chrIX	143073	143073	+	CDS	HIS5	YIL116W	sense	143073	143086	13	3.20661	2.04057	0	2	2.9151
chrIX	165974	165974	+	intergenic_region	INT_0_2292	INT_0_2292	sense	165971	166028	57	11.0774	4.08114	39	14	6.49083
chrIX	177834	177834	+	intergenic_region	INT_0_2306	INT_0_2306	sense	177809	177872	63	10.4944	2.62359	26	14	10.2029
chrIX	203201	203201	+	CUTs	CUT189	ST1621	sense	203173	203203	30	4.95567	2.04057	17	5	4.66416
chrIX	217609	217605	+	3UTR	SEC28	YIL076W	sense	217605	217609	4	19.8227	14.5755	0	2	3.43632
chrIX	221122	221130	+	CUTs	XUT_9F-111	572326	sense	221081	221328	247	81.9143	12.5349	128	63	5.50261
chrIX	275073	275073	+	intergenic_region	INT_0_2389	INT_0_2389	sense	275073	275074	1	2.04057	2.04057	-1	1	2.04057
chrIX	278237	278237	+	3UTR	APQ12	YIL040W	sense	278237	278238	1	3.78963	2.9151	0	2	2.9151
chrIX	310915	310915	+	intergenic_region	INT_0_2414	INT_0_2414	sense	310911	310925	14	3.78963	2.04057	5	3	3.49812
chrIX	363746	363746	+	CDS	DJP1	YIR004W	sense	363746	363747	1	2.04057	2.04057	-1	1	2.04057
chrIX	370349	370349	+	tRNA_100_nt_upstream	INT_0_2465	INT_0_2465	sense	370348	370350	2	3.78963	3.49812	-1	1	3.78963
chrXI	26443	26437	+	3UTR	URA1	YKL216W	sense	26433	26443	10	11.0774	4.08114	7	6	2.4671
chrXI	38708	38707	+	snoRNA_300_nt_upstream	INT_0_5039	INT_0_5039	sense	38695	38749	54	47.8076	24.4868	6	8	15.5589
chrXI	38935	38995	+	snoRNA_1000_nt_downstream	CUT226	ST1920	sense	38907	39617	710	1191.98	141.091	226	164	53.0387
chrXI	48041	48041	+	3UTR	CBT1	YKL208W	sense	48041	48063	22	7.28775	2.9151	4	5	2.13816
chrXI	55752	55749	+	3UTR	EAP1	YKL204W	sense	55749	55752	3	6.99624	4.08114	2	3	2.22725
chrXI	67645	67642	+	SUTs	SUT221	ST1926	sense	67618	67696	78	63.5492	12.5349	41	25	2.48837
chrXI	67772	67772	+	XUTs	SUT221	ST1926	sense	67755	67780	25	9.03681	2.04057	8	7	6.68174
chrXI	83015	83015	+	intron	YKL190W_intron	intergenic	sense	83002	83016	14	3.78963	2.62359	10	2	3.78963
chrXI	86120	86120	+	3UTR	HYM1	YKL189W	sense	86120	86184	64	7.28775	2.33208	55	9	2.09998
chrXI	98465	98465	+	3UTR	INT_0_5079	INT_0_5079	sense	98465	98466	1	2.04057	2.04057	-1	1	2.04057
chrXI	127121	127121	+	3UTR	EBP2	YKL172W	sense	127120	127123	3	3.20661	2.33208	0	2	2.9151
chrXI	143722	143855	+	5UTR	SUT228	ST1948	sense	143657	144002	345	95.3238	6.12171	181	93	3.32557
chrXI	144434	144434	+	CDS	PIR3	YKL163W	sense	144434	144485	51	4.66416	2.04057	42	7	4.08114
chrXI	152934	152911	+	XUTs	SUT229	ST1950	sense	152877	152967	90	27.1104	5.8302	44	13	5.12267
chrXI	165255	165275	+	antisense_CDS	INT_0_5124	INT_0_5124	sense	165122	165665	543	59.468	2.04057	328	104	38.7541
chrXI	166058	166054	+	intergenic_region	INT_0_5124	INT_0_5124	sense	166026	166068	42	23.3208	6.41322	24	18	9.59741
chrXI	176579	176579	+	intergenic_region	XUT_11F-77	572483	sense	176537	176582	45	14.284	2.9151	38	11	3.05451
chrXI	177386	177386	+	CDS	LTV1	YKL143W	sense	177379	177388	9	4.95567	2.62359	6	3	4.37265
chrXI	218604	218587	+	antisense_CDS	INT_0_5166	INT_0_5166	sense	218587	218625	38	9.32832	3.78963	18	6	2.95906
chrXI	241928	241928	+	antisense_CDS	INT_0_5185	INT_0_5185	sense	241912	241938	26	4.08114	2.04057	12	5	3.78963
chrXI	246446	246445	+	CUTs	CUT229	ST1983	sense	246283	246491	208	32.9406	2.9151	142	54	9.35444
chrXI	247860	247860	+	intergenic_region	INT_0_5188	INT_0_5188	sense	247718	247871	153	17.1991	4.08114	73	18	3.87541
chrXI	248604	248602	+	intergenic_region	INT_0_5188	INT_0_5188	sense	248584	248620	36	7.87077	2.9151	4	4	7.57926
chrXI	248882	248885	+	5UTR	HSL1	YKL101W	sense	248849	248916	67	39.3539	9.03681	33	20	25.5815
chrXI	251456	251456	+	CDS	HSL1	YKL101W	sense	251456	251492	36	5.24718	2.04057	35	6	4.08114
chrXI	253533	253536	+	3UTR	HSL1	YKL101W	sense	253493	253555	62	131.763	29.734	12	13	2.86997
chrXI	264365	264365	+	3UTR	MBR1	YKL093W	sense	264364	264372	8	4.37265	2.04057	6	2	2.33208
chrXI	283280	283288	+	snoRNA_1000_nt_downstream	YKL081W_intron	intergenic	sense	283259	283334	75	32.9406	8.45379	37	14	32.6491
chrXI	283418	283417	+	snoRNA_1000_nt_downstream	YKL081W_intron	intergenic	sense	283358	283436	78	609.547	176.655	5	7	132.935
chrXI	317641	317703	+	5UTR	MNR2	YKL064W	sense	317623	317829	206	94.1577	16.3246	150	72	3.97192
chrXI	321450	321450	+	3UTR	MNR2	YKL064W	sense	321448	321454	6	4.95567	2.9151	1	3	4.37265
chrXI	342704	342704	+	3UTR	SFK1	YKL051W	sense	342704	342710	6	5.53869	2.33208	5	5	2.00452
chrXI	342810	342810	+	intergenic_region	INT_0_5274	INT_0_5274	sense	342810	342924	114	11.3689	2.04057	72	18	11.0774
chrXI	364676	364676	+	snoRNA_300_nt_upstream	CUT234	ST2027	sense	364667	364696	29	58.5935	26.2359	6	8	17.818
chrXI	364726	364726	+	snoRNA_300_nt_upstream	CUT234	ST2027	sense	364718	364734	16	20.9887	3.78963	5	7	20.6972
chrXI	364875	364948	+	snoRNA	SNR69	snR69	sense	364872	365337	465	515.973	46.9331	312	237	98.5
chrXI	365484	365429	+	snoRNA_1000_nt_downstream	INT_0_5290	INT_0_5290	sense	365367	365708	341	81.9143	2.9151	184	104	53.4539
chrXI	369288	369290	+	3UTR	RGT1	YKL038W	sense	369244	369307	63	51.3058	14.867	25	15	2.77168
chrXI	432771	432765	+	3UTR	RPL14A	YKL006W	sense	432764	432771	7	9.91134	6.12171	5	3	3.4745
chrXI	440101	440106	+	CUTs	CUT238	ST2050	sense	440058	440116	58	17.4906	3.78963	29	15	15.7415
chrXI	462787	462787	+	SUTs	XUT_11F-207	572503	sense	462780	462788	8	4.37265	2.9151	1	6	4.00904
chrXI	463944	463943	+	5UTR	PRY2	YKR013W	sense	463923	464067	144	26.2359	2.33208	88	37	7.929
chrXI	465259	465249	+	intergenic_region	INT_0_5360	INT_0_5360	sense	465247	465275	28	27.6935	10.4944	10	10	2.41571
chrXI	490086	490168	+	CUTs	XUT_11F-216	572506	sense	490085	490455	370	109.025	4.37265	246	115	27.6179
chrXI	495921	495921	+	CDS	SAP190	YKR028W	sense	495921	495938	17	3.20661	2.33208	3	2	2.9151
chrXI	517921	517920	+	tRNA_100_nt_upstream	CUT243	ST2076	sense	517888	517934	46	6.12171	2.33208	7	6	5.8302
chrXI	534117	534148	+	SUTs	XUT_11F-230	572507	sense	534073	534289	216	49.5567	2.04057	128	62	8.06581
chrXI	559120	559120	+	3UTR	KTR2	YKR061W	sense	559120	559183	63	11.0774	2.33208	42	14	4.49499
chrXI	578901	578901	+	tRNA_100_nt_upstream	XUT_11F-252	572510	sense	578891	578902	11	3.20661	2.04057	2	3	3.20661
chrXI	584823	584823	+	3UTR	MSA2	YKR077W	sense	584823	584844	21	4.66416	2.33208	17	3	3.11815
chrXI	591511	591510	+	3UTR	MTD1	YKR080W	sense	591510	591552	42	10.2029	2.62359	33	13	5.04843
chrXI	615657	615657	+	5UTR	INT_0_5476	INT_0_5476	sense	615539	615666	127	21.2802	3.20661	93	25	5.87993
chrVI	8714	8714	+	intergenic_region	INT_0_3003	INT_0_3003	sense	8708	8741	33	10.2029	2.62359	21	14	9.61983
chrVI	38930	38930	+	antisense_CDS	INT_0_3022	INT_0_3022	sense	38898	38949	51	7.28775	2.33208	27	9	6.41322
chrVI	74660	74660	+	intergenic_region	INT_0_3041	INT_0_3041	sense	74639	74696	57	10.4944	2.04057	34	10	7.79536
chrVI	90823	90823	+	intergenic_region	SUT103	ST0990	sense	90820	90841	21	6.70473	2.33208	11	6	6.41322
chrVI	107792	107778	+	3UTR	HSP12	YFL014W	sense	107730	107811	81	34.3982	10.2029	24	12	6.5147
chrVI	110569	110564	+	5UTR	SUT105	ST0998	sense	110351	110709	358	70.2539	5.8302	174	72	11.8786
chrVI	115071	115071	+	CDS	AUA1	YFL010W-A	sense	115071	115160	89	20.1142	2.33208	82	30	7.57264
chrVI	208425	208425	+	3UTR	ECO1	YFR027W	sense	208424	208426	2	3.20661	2.04057	0	2	3.20661
chrXVI	75448	75448	+	SUTs	XUT_16F-27	573092	sense	75405	75454	49	17.4906	4.66416	8	9	16.6161
chrXVI	79674	79674	+	SUTs	XUT_16F-30	573094	sense	79641	79734	93	11.3689	2.62359	34	10	11.0774
chrXVI	87009	87011	+	3UTR	YPL245W	YPL245W	sense	86983	87046	63	216.883	68.5049	9	10	3.81887
chrXVI	99258	99258	+	XUTs	XUT_16F-36	573097	sense	99247	99267	20	5.24718	2.33208	3	5	4.95567
chrXVI	121752	121752	+	5UTR	NEW1	YPL226W	sense	121739	121853	114	7.57926	2.33208	83	11	6.68174
chrXVI	126600	126594	+	3UTR	INT_0_8486	INT_0_8486	sense	126591	126600	9	11.6604	4.08114	5	7	2.31634
chrXVI	173926	173959	+	snoRNA_1000_nt_downstream	YPL198W_intron	intergenic	sense	173544	174139	595	711.867	211.928	148	80	85.8428
chrXVI	220559	220563	+	antisense_CDS	INT_0_8566	INT_0_8566	sense	220549	220607	58	12.8264	2.9151	16	11	4.42023
chrXVI	250674	250673	+	CUTs	CUT410	ST3401	sense	250669	250695	26	16.0331	3.78963	20	10	3.03715
chrXVI	283123	283114	+	intergenic_region	INT_0_8606	INT_0_8606	sense	283113	283126	13	17.4906	9.61983	8	6	2.02165
chrXVI	298581	298581	+	antisense_CDS	INT_0_8619	INT_0_8619	sense	298565	298583	18	7.57926	2.62359	12	8	3.41511
chrXVI	316557	316556	+	3UTR	KAP120	YPL125W	sense	316556	316557	1	8.7453	6.41322	0	2	2.33208
chrXVI	337451	337456	+	3UTR	YPL114W	YPL114W	sense	337436	337477	41	13.118	8.45379	19	5	12.8264
chrXVI	369569	369569	+	SUTs	XUT_16F-151	573115	sense	369569	369590	21	3.78963	2.33208	10	4	3.49812
chrXVI	393770	393770	+	intergenic_region	INT_0_8686	INT_0_8686	sense	393765	393774	9	5.24718	2.33208	5	5	4.00904
chrXVI	405449	405511	+	intron	YPL081W_intron	intergenic	sense	405420	405538	118	51.0143	3.78963	76	42	8.30445
chrXVI	405806	405806	+	CDS	RPS9A	YPL081W	sense	405570	405929	359	47.2246	2.62359	238	78	46.9331
chrXVI	412496	412492	+	intron	YPL075W_intron	intergenic	sense	412414	412580	166	26.5274	4.08114	114	31	8.59081
chrXVI	413114	413114	+	CDS	GCR1	YPL075W	sense	413094	413138	44	7.28775	2.62359	10	5	6.99624
chrXVI	415578	415558	+	3UTR	GCR1	YPL075W	sense	415554	415594	40	55.6784	14.5755	7	8	2.05341
chrXVI	420062	420062	+	3UTR	UBP16	YPL072W	sense	420057	420070	13	4.37265	2.04057	4	4	3.11815
chrXVI	434210	434215	+	3UTR	ALD6	YPL061W	sense	434210	434230	20	19.8227	7.28775	19	12	2.35013
chrXVI	454338	454396	+	CUTs	CUT420	ST3469	sense	454293	454577	284	66.7558	2.62359	183	93	25.3906
chrXVI	455445	455454	+	intergenic_region	INT_0_8735	INT_0_8735	sense	455429	455472	43	16.6161	3.20661	17	9	4.67722
chrXVI	482769	482769	+	5UTR	XUT_16F-193	573124	sense	482704	482831	127	24.7784	2.33208	53	31	2.87829
chrXVI	503429	503425	+	5UTR	RMI1	YPL024W	sense	503424	503429	5	102.029	37.8963	2	4	2.194
chrXVI	510603	510603	+	intergenic_region	INT_0_8784	INT_0_8784	sense	510603	510638	35	6.12171	3.49812	6	4	4.45449
chrXVI	517685	517702	+	CDS	CTF19	YPL018W	sense	517606	517814	208	95.0323	5.24718	79	64	17.3725
chrXVI	569215	569213	+	intergenic_region	INT_0_8825	INT_0_8825	sense	569209	569238	29	7.28775	2.33208	6	6	6.99624
chrXVI	581993	581993	+	tRNA_100_nt_upstream	XUT_16F-233	573133	sense	581971	582015	44	7.28775	2.04057	10	9	6.99624
chrXVI	608640	608640	+	CUTs	XUT_16F-243	573136	sense	608626	608648	22	4.08114	2.04057	18	4	3.49812
chrXVI	624552	624552	+	antisense_CDS	INT_0_8865	INT_0_8865	sense	624545	624568	23	3.49812	2.04057	11	3	3.20661
chrXVI	642128	642136	+	5UTR	GLN1	YPR035W	sense	642027	642272	245	53.6378	3.20661	123	50	4.29038
chrXVI	689649	689651	+	tRNA_100_nt_downstream	INT_0_8920	INT_0_8920	sense	689648	689813	165	30.0255	2.33208	147	40	12.3916
chrXVI	698351	698405	+	3UTR	YPR076W	YPR076W	sense	698318	698488	170	49.2652	6.12171	125	34	4.7483
chrXVI	742790	742790	+	CDS	RPN7	YPR108W	sense	742788	742791	3	2.9151	2.62359	-1	1	2.9151
chrXVI	744362	744362	+	tRNA_100_nt_downstream	YPR108W-A	YPR108W-A	sense	744358	744495	137	27.4019	2.9151	81	33	2.43687
chrXVI	795963	795972	+	intergenic_region	INT_0_9007	INT_0_9007	sense	795958	795983	25	52.1803	19.5312	14	14	3.9645
chrXVI	810607	810608	+	tRNA_100_nt_upstream	INT_0_9016	INT_0_9016	sense	810571	810627	56	26.5274	8.7453	12	8	26.2359
chrXVI	822079	822089	+	snoRNA_1000_nt_downstream	CUT433	ST3594	sense	821824	822356	532	1689.88	61.2171	235	193	49.3342
chrXVI	833629	833629	+	intergenic_region	INT_0_9039	INT_0_9039	sense	833617	833630	13	4.95567	2.9151	6	4	4.95567
chrXVI	835542	835534	+	3UTR	INT_0_9042	INT_0_9042	sense	835534	835542	8	6.12171	2.33208	7	6	2.17157
chrXVI	860023	860020	+	3UTR	KRE6	YPR159W	sense	860020	860023	3	18.9482	10.7859	1	3	2.49452
chrXVI	877277	877277	+	CUTs	CUT434	ST3608	sense	877092	877342	250	30.0255	2.62359	171	58	29.734
chrXVI	930191	930191	+	SUTs	SUT430	ST3628	sense	930191	930192	1	2.04057	2.04057	0	2	2.04057
chrX	72696	72696	+	3UTR	YJL193W	YJL193W	sense	72696	72748	52	23.6123	10.4944	4	6	3.05451
chrX	74316	74316	+	CDS	RPS14B	YJL191W	sense	74087	74408	321	225.629	12.8264	125	106	34.4332
chrX	74469	74479	+	CDS	RPS14B	YJL191W	sense	74455	74619	164	25.9444	2.33208	107	35	25.6529
chrX	90789	90789	+	CDS	RPL17B	YJL177W	sense	90665	90899	234	78.4162	8.45379	75	49	21.0671
chrX	96864	96864	+	XUTs	XUT_10F-42	572383	sense	96864	97073	209	34.3982	2.9151	146	59	6.25411
chrX	101847	101847	+	XUTs	XUT_10F-44	572384	sense	101847	101936	89	16.6161	2.9151	74	26	12.4726
chrX	122016	122016	+	3UTR	INT_0_4552	INT_0_4552	sense	122016	122021	5	4.95567	2.33208	4	4	3.4745
chrX	126490	126476	+	intergenic_region	XUT_10F-55	572388	sense	126410	126500	90	27.4019	8.16228	56	18	7.76752
chrX	129075	129074	+	intergenic_region	INT_0_4557	INT_0_4557	sense	129075	129096	21	6.99624	4.08114	13	6	6.70473
chrX	141448	141448	+	CUTs	CUT202	ST1735	sense	141436	141465	29	7.57926	3.49812	16	8	2.96966
chrX	142866	142866	+	XUTs	XUT_10F-68	572393	sense	142858	142867	9	5.24718	2.62359	2	3	5.24718
chrX	182347	182390	+	CUTs	XUT_10F-87	572399	sense	182285	182424	139	31.4831	3.78963	63	29	3.17754
chrX	207580	207580	+	3UTR	MDV1	YJL112W	sense	207580	207592	12	11.9519	3.20661	11	8	2.50565
chrX	233874	233873	+	tRNA_100_nt_upstream	MEF2	YJL102W	sense	233873	233882	9	16.0331	9.32832	1	3	2.44229
chrX	234010	234010	+	tRNA	tR(ACG)J	tR(ACG)J	sense	234005	234026	21	28.2765	20.9887	2	4	9.16353
chrX	274798	274798	+	3UTR	EXO70	YJL085W	sense	274792	274808	16	7.57926	2.62359	9	4	3.24542
chrX	289826	289824	+	SUTs	SUT209	ST1778	sense	289809	289990	181	20.1142	4.37265	134	27	19.8227
chrX	317143	317141	+	3UTR	RRG10	YJL062W-A	sense	317141	317143	2	8.45379	4.08114	1	3	2.22725
chrX	326276	326276	+	3UTR	YHC3	YJL059W	sense	326274	326277	3	6.41322	2.9151	0	2	4.08114
chrX	377442	377442	+	3UTR	INT_0_4737	INT_0_4737	antisense	377442	377474	32	5.8302	2.33208	3	5	2.11588
chrX	407413	407412	+	3UTR	INT_0_4765	INT_0_4765	sense	407408	407425	17	20.6972	14.284	3	3	5.84652
chrX	409466	409466	+	intergenic_region	INT_0_4767	INT_0_4767	sense	409466	409493	27	4.95567	2.33208	3	4	4.27631
chrX	414001	414001	+	CUTs	CUT213	ST1815	sense	413887	414123	236	29.151	2.33208	153	47	28.8595
chrX	423160	423154	+	antisense_CDS	INT_0_4780	INT_0_4780	sense	423108	423236	128	53.0548	3.78963	48	38	5.75902
chrX	432475	432475	+	intergenic_region	INT_0_4784	INT_0_4784	sense	432473	432651	178	13.118	2.62359	164	21	12.8264
chrX	433216	433216	+	3UTR	COX16	YJL003W	sense	433215	433248	33	6.70473	2.33208	20	6	2.09998
chrX	438721	438721	+	3UTR	AVT1	YJR001W	sense	438721	438725	4	5.24718	2.62359	3	5	3.49812
chrX	445741	445741	+	intergenic_region	INT_0_4793	INT_0_4793	sense	445726	445747	21	6.99624	2.33208	8	6	6.70473
chrX	450697	450697	+	3UTR	POL31	YJR006W	sense	450697	450713	16	3.20661	2.33208	2	2	2.62359
chrX	456211	456222	+	5UTR	INT_0_4804	INT_0_4804	antisense	456201	456405	204	45.4756	2.62359	115	52	5.31113
chrX	467209	467209	+	3UTR	YJR018W	YJR018W	sense	467178	467233	55	15.45	7.28775	13	8	6.94901
chrX	468555	468555	+	3UTR	YJR020W	YJR020W	sense	468549	468598	49	7.28775	2.9151	42	9	2.6727
chrX	532218	532218	+	CDS	RAD7	YJR052W	sense	532218	532219	1	2.62359	2.62359	-1	1	2.62359
chrX	533819	533819	+	3UTR	RAD7	YJR052W	sense	533819	533821	2	3.78963	2.33208	0	2	2.6727
chrX	585911	585910	+	CUTs	CUT217	ST1866	sense	585887	585937	50	16.6161	5.53869	4	5	16.3246
chrX	617850	617850	+	tRNA_100_nt_upstream	INT_0_4922	INT_0_4922	sense	617709	617858	149	21.2802	2.62359	123	27	16.0362
chrX	619146	619146	+	3UTR	RSM26	YJR101W	sense	619146	619150	4	3.78963	2.33208	0	2	2.44997
chrX	620874	620890	+	CDS	URA8	YJR103W	sense	620728	621047	319	87.453	2.62359	174	108	28.5406
chrX	664026	664335	+	snoRNA_1000_nt_downstream	INT_0_4967	INT_0_4967	sense	663889	665070	1181	922.629	53.3463	763	542	41.0246
chrX	697020	697020	+	3UTR	YJR141W	YJR141W	sense	697020	697021	1	2.04057	2.04057	-1	1	2.04057
chrVII	37617	37676	+	3UTR	BRR6	YGL247W	sense	37606	37677	71	12.2434	2.33208	58	17	2.6727
chrVII	64303	64303	+	CUTs	XUT_7F-31	572070	sense	64302	64370	68	23.3208	3.49812	38	22	3.91006
chrVII	95809	95799	+	5UTR	MIG2	YGL209W	sense	95799	95819	20	6.12171	2.62359	9	3	3.81814
chrVII	115416	115416	+	tRNA_100_nt_upstream	INT_0_3273	INT_0_3273	sense	115372	115425	53	6.12171	2.04057	23	8	5.8302
chrVII	139642	139635	+	3UTR	INT_0_3288	INT_0_3288	sense	139616	139642	26	50.1397	34.6897	4	4	2.6232
chrVII	145245	145245	+	3UTR	COX13	YGL191W	sense	145234	145261	27	3.20661	2.04057	8	3	2.9151
chrVII	183906	183906	+	CDS	ROK1	YGL171W	sense	183906	183914	8	2.33208	2.04057	-1	1	2.04057
chrVII	281246	281246	+	CUTs	XUT_7F-133	572085	sense	281183	281336	153	22.1548	2.33208	67	31	10.0226
chrVII	284271	284270	+	intergenic_region	INT_0_3390	INT_0_3390	sense	284252	284284	32	52.4718	14.867	8	9	52.1803
chrVII	295786	295786	+	3UTR	INT_0_3402	INT_0_3402	sense	295785	295795	10	4.08114	2.33208	0	2	3.78963
chrVII	317079	317169	+	snoRNA_1000_nt_downstream	USE1	YGL098W	sense	317074	317463	389	881.526	206.098	187	155	61.2088
chrVII	319914	319915	+	tRNA_100_nt_downstream	INT_0_3420	INT_0_3420	sense	319909	319928	19	11.6604	2.62359	5	6	11.3689
chrVII	320526	320511	+	SUTs	SUT114	ST1139	sense	320193	320606	413	89.4936	13.118	271	97	7.17408
chrVII	323281	323276	+	3UTR	SRM1	YGL097W	sense	323258	323288	30	6.41322	2.33208	4	3	2.22725
chrVII	346229	346184	+	snoRNA	SNR10	snR10	sense	346109	346229	120	39.6454	17.7821	74	26	5.56812
chrVII	346254	346381	+	snoRNA_1000_nt_downstream	INT_0_3438	INT_0_3438	sense	346246	346918	672	4123.12	431.143	262	236	105.586
chrVII	385162	385254	+	3UTR	PUS2	YGL063W	sense	385162	385393	231	27.4019	3.78963	161	46	3.76607
chrVII	388873	388876	+	3UTR	PYC1	YGL062W	sense	388873	388898	25	9.32832	3.20661	5	5	3.76607
chrVII	435099	435099	+	intergenic_region	SUT119	ST1183	sense	435096	435133	37	7.87077	5.24718	16	4	6.68174
chrVII	439871	439871	+	5UTR	INT_0_3524	INT_0_3524	sense	439862	439904	42	6.12171	3.20661	28	6	5.8302
chrVII	484289	484285	+	3UTR	CUT144	ST1195	sense	484271	484295	24	8.16228	3.20661	2	4	3.60814
chrVII	484604	484604	+	CUTs	CUT144	ST1195	sense	484518	484705	187	20.9887	2.62359	121	33	7.29852
chrVII	484807	484831	+	CUTs	CUT144	ST1195	sense	484778	485189	411	69.6709	4.08114	299	101	17.5952
chrVII	508141	508141	+	3UTR	MUQ1	YGR007W	sense	508141	508153	12	3.78963	2.04057	9	2	2.6727
chrVII	514393	514393	+	3UTR	YGR012W	YGR012W	sense	514393	514394	1	2.33208	2.33208	-1	1	2.33208
chrVII	520993	520993	+	3UTR	MSB2	YGR014W	sense	520991	520996	5	6.41322	2.33208	4	4	3.74177
chrVII	545232	545255	+	snoRNA_300_nt_upstream	CUT146	ST1216	sense	545231	545280	49	36.1472	3.20661	40	29	35.8557
chrVII	545588	545631	+	snoRNA_1000_nt_downstream	INT_0_3603	INT_0_3603	sense	545577	546170	593	2555.09	558.533	304	241	125.918
chrVII	548048	548048	+	5UTR	INT_0_3606	INT_0_3606	antisense	548037	548065	28	5.53869	2.33208	12	5	2.6727
chrVII	554034	554029	+	3UTR	TIM21	YGR033C	antisense	554029	554034	5	35.2727	24.4868	0	2	2.14978
chrVII	555326	555326	+	intergenic_region	INT_0_3608	INT_0_3608	sense	555274	555333	59	11.9519	2.9151	23	11	8.90899
chrVII	556911	556929	+	5UTR	INT_0_3610	INT_0_3610	sense	556896	556944	48	20.1142	6.70473	25	9	4.13053
chrVII	559442	559467	+	CUTs	XUT_7F-261	572097	sense	559405	559570	165	83.9549	9.91134	69	49	4.67722
chrVII	582905	582905	+	intergenic_region	INT_0_3628	INT_0_3628	sense	582889	582908	19	7.28775	3.78963	7	6	6.12171
chrVII	592145	592121	+	3UTR	SCM4	YGR049W	sense	592121	592161	40	9.32832	3.49812	24	6	3.18668
chrVII	606104	606104	+	5UTR	CUT149	ST1236	sense	605938	606178	240	52.1803	2.33208	149	72	23.787
chrVII	609470	609473	+	snoRNA_300_nt_upstream	INT_0_3647	INT_0_3647	sense	609450	609517	67	118.936	13.701	36	31	77.6991
chrVII	609696	609791	+	snoRNA	SNR48	snR48	sense	609692	610086	394	1616.13	501.397	197	121	127.713
chrVII	631434	631434	+	intergenic_region	INT_0_3667	INT_0_3667	sense	631431	631450	19	5.53869	3.78963	8	3	5.24718
chrVII	639707	639707	+	intergenic_region	INT_0_3673	INT_0_3673	sense	639707	639710	3	4.08114	2.33208	1	3	3.78963
chrVII	666207	666207	+	intergenic_region	INT_0_3693	INT_0_3693	sense	666206	666231	25	4.08114	2.33208	14	4	2.89542
chrVII	700607	700605	+	tRNA_100_nt_upstream	CUT153	ST1268	sense	700582	700621	39	18.6566	7.57926	11	10	18.3651
chrVII	703382	703495	+	3UTR	YGR107W	YGR107W	sense	703343	703597	254	48.0992	2.33208	156	67	5.34539
chrVII	728053	728055	+	antisense_CDS	INT_0_3739	INT_0_3739	sense	728014	728152	138	117.187	24.1953	52	43	3.69569
chrVII	731071	731071	+	tRNA_100_nt_upstream	INT_0_3741	INT_0_3741	sense	731067	731081	14	4.66416	2.04057	8	6	4.37265
chrVII	733689	733693	+	intergenic_region	INT_0_3747	INT_0_3747	sense	733589	734064	475	99.1134	5.24718	207	112	12.9435
chrVII	735926	735925	+	intergenic_region	INT_0_3748	INT_0_3748	sense	735912	735939	27	13.9925	2.9151	4	5	13.701
chrVII	739697	739697	+	CUTs	CUT155	ST1284	sense	739674	739703	29	12.5349	3.20661	7	7	12.2434
chrVII	763741	763741	+	intergenic_region	INT_0_3776	INT_0_3776	sense	763741	763751	10	4.37265	3.49812	1	2	4.08114
chrVII	767194	767215	+	intergenic_region	INT_0_3779	INT_0_3779	sense	767123	767393	270	259.444	19.8227	132	110	21.9755
chrVII	846831	846831	+	3UTR	YGR174W-A	YGR174W-A	sense	846821	846838	17	4.37265	2.33208	11	4	3.20724
chrVII	851029	851029	+	XUTs	XUT_7F-384	572117	sense	851029	851031	2	4.08114	2.33208	1	3	2.62359
chrVII	879824	879827	+	intergenic_region	INT_0_3864	INT_0_3864	sense	879732	879961	229	43.1435	3.20661	94	52	42.852
chrVII	964941	964941	+	antisense_CDS	INT_0_3935	INT_0_3935	sense	964941	964971	30	2.9151	2.04057	15	3	2.62359
chrVII	974776	974776	+	5UTR	XUT_7F-439	572128	sense	974776	974791	15	5.8302	4.37265	0	2	3.00678
chrVII	979770	979770	+	antisense_CDS	INT_0_3945	INT_0_3945	sense	979760	979779	19	2.62359	2.04057	8	2	2.33208
chrVII	996766	996759	+	3UTR	YGR251W	YGR251W	sense	996759	996774	15	20.9887	14.284	6	5	2.17545
chrVII	1000823	1000823	+	CUTs	CUT166	ST1369	sense	1000818	1000853	35	6.99624	2.04057	12	8	6.70473
chrVII	1004328	1004328	+	tRNA_100_nt_downstream	INT_0_3964	INT_0_3964	sense	1004291	1004349	58	19.8227	5.8302	36	17	19.5312
chrVII	1055722	1055722	+	CDS	YOR1	YGR281W	sense	1055713	1055731	18	2.9151	2.04057	9	3	2.62359
chrVII	1059759	1059759	+	antisense_CDS	XUT_7F-469	572133	sense	1059637	1059885	248	38.7708	3.20661	163	60	5.69026
chrVII	1083741	1083751	+	intergenic_region	INT_0_4017	INT_0_4017	sense	1083675	1083752	77	30.6086	6.41322	62	19	3.11815
chrIII	23989	23990	+	3UTR	ADF1	YCL058W-A	sense	23966	24002	36	115.438	52.7633	2	4	2.73501
chrIII	32548	32541	+	CDS	SPB1	YCL054W	sense	32541	32548	7	6.12171	3.78963	6	2	2.33208
chrIII	41383	41393	+	intergenic_region	INT_0_834	INT_0_834	sense	41378	41558	180	60.0511	19.2397	32	24	4.41857
chrIII	83228	83228	+	intergenic_region	INT_0_866	INT_0_866	sense	83228	83229	1	3.49812	2.62359	0	2	2.62359
chrIII	84707	84707	+	intergenic_region	INT_0_868	INT_0_868	sense	84688	84710	22	9.61983	2.62359	13	7	2.17157
chrIII	107526	107526	+	3UTR	VMA9	YCL005W-A	sense	107526	107541	15	6.70473	2.33208	10	7	2.15872
chrIII	164308	164308	+	CUTs	CUT047	ST0315	sense	164289	164378	89	14.5755	8.45379	21	11	14.284
chrIII	177307	177323	+	snoRNA_1000_nt_downstream	INT_0_957	INT_0_957	sense	177282	177567	285	424.73	83.0804	168	119	84.5966
chrIII	179284	179285	+	CUTs	CUT048	ST0318	sense	179259	179304	45	20.6972	6.99624	5	7	20.4057
chrIII	186153	186153	+	3UTR	INT_0_960	INT_0_960	antisense	186109	186154	45	8.16228	2.33208	40	10	2.87829
chrIV	117115	117112	+	3UTR	ARF1	YDL192W	sense	117111	117115	4	23.6123	19.2397	-1	1	3.34087
chrIV	148049	148049	+	intergenic_region	INT_0_1159	INT_0_1159	sense	148020	148058	38	6.41322	2.33208	14	6	5.8302
chrIV	167580	167580	+	antisense_CDS	INT_0_1173	INT_0_1173	sense	167576	167598	22	8.7453	4.66416	3	4	8.45379
chrIV	190736	190736	+	intergenic_region	INT_0_1192	INT_0_1192	sense	190700	190746	46	4.95567	2.62359	28	5	4.66416
chrIV	218428	218411	+	3UTR	RPL35B	YDL136W	sense	218409	218428	19	22.1548	13.701	9	6	2.76815
chrIV	302814	302814	+	intergenic_region	INT_0_1273	INT_0_1273	sense	302810	302826	16	4.37265	2.04057	9	5	4.08114
chrIV	331186	331185	+	CDS	BDF2	YDL070W	sense	331175	331234	59	27.1104	7.57926	10	11	26.8189
chrIV	332357	332354	+	CDS	BDF2	YDL070W	sense	332343	332403	60	30.6086	4.66416	43	20	4.17103
chrIV	349354	349354	+	CDS	USO1	YDL058W	sense	349354	349357	3	4.08114	3.78963	-1	1	3.78963
chrIV	350977	350977	+	CDS	USO1	YDL058W	sense	350975	350995	20	4.66416	2.04057	17	5	2.33861
chrIV	359512	359512	+	tRNA_100_nt_upstream	INT_0_1317	INT_0_1317	sense	359507	359521	14	11.0774	4.37265	5	7	10.7859
chrIV	359814	359812	+	intergenic_region	INT_0_1318	INT_0_1318	sense	359812	359819	7	32.3576	9.03681	5	7	2.20497
chrIV	372037	372034	+	3UTR	NPC2	YDL046W	sense	372034	372037	3	33.2321	27.6935	-1	1	2.30824
chrIV	433307	433304	+	3UTR	GRX6	YDL010W	sense	433304	433307	3	23.0293	16.6161	0	2	2.6727
chrIV	503693	503693	+	CDS	MIC14	YDR031W	sense	503693	503694	1	2.33208	2.33208	-1	1	2.33208
chrIV	520905	520904	+	tRNA_100_nt_upstream	INT_0_1447	INT_0_1447	sense	520884	520914	30	13.4095	4.37265	6	7	13.118
chrIV	523171	523171	+	3UTR	ARO3	YDR035W	sense	523166	523199	33	6.99624	2.33208	14	9	2.19543
chrIV	551537	551545	+	5UTR	INT_0_1466	INT_0_1466	sense	551474	551754	280	51.8888	4.66416	142	62	9.85557
chrIV	579258	579258	+	intergenic_region	INT_0_1497	INT_0_1497	sense	579258	579260	2	2.9151	2.33208	1	2	2.33208
chrIV	593199	593184	+	3UTR	SNF11	YDR073W	sense	593184	593246	62	26.2359	6.12171	25	14	2.24406
chrIV	602191	602150	+	intergenic_region	INT_0_1516	INT_0_1516	sense	602150	602191	41	32.0661	4.95567	37	24	2.07134
chrIV	616945	616945	+	antisense_CDS	SUT057	ST0538	sense	616809	616992	183	41.9774	2.33208	117	57	8.68626
chrIV	621913	621913	+	intergenic_region	INT_0_1530	INT_0_1530	sense	621913	621920	7	3.78963	2.33208	6	4	2.9151
chrIV	668981	668981	+	intergenic_region	INT_0_1556	INT_0_1556	sense	668981	669037	56	13.9925	3.49812	44	18	4.18722
chrIV	671089	671095	+	intergenic_region	INT_0_1556	INT_0_1556	sense	671063	671146	83	50.4312	23.9038	17	17	8.11354
chrIV	730393	730389	+	3UTR	RGP1	YDR137W	sense	730389	730400	11	9.03681	3.78963	4	4	2.15301
chrIV	734929	734929	+	3UTR	MTQ2	YDR140W	sense	734922	734952	30	3.78963	2.04057	24	5	2.6727
chrIV	806614	806614	+	5UTR	HSP42	YDR171W	sense	806614	806629	15	5.24718	3.78963	3	3	4.95567
chrIV	817678	817678	+	intergenic_region	INT_0_1656	INT_0_1656	sense	817678	817723	45	5.8302	2.33208	33	8	3.62723
chrIV	899318	899323	+	intergenic_region	INT_0_1707	INT_0_1707	sense	899309	899327	18	12.5349	4.37265	10	6	3.30157
chrIV	899504	899503	+	intergenic_region	INT_0_1707	INT_0_1707	sense	899474	899523	49	10.2029	3.49812	38	9	4.54358
chrIV	911464	911464	+	3UTR	YDR222W	YDR222W	sense	911464	911477	13	6.99624	4.95567	0	2	3.0736
chrIV	917309	917306	+	3UTR	ADK1	YDR226W	sense	917307	917309	2	7.57926	4.95567	1	3	2.40543
chrIV	931116	931131	+	5UTR	LYS4	YDR234W	sense	931027	931222	195	73.752	4.95567	71	56	10.8632
chrIV	948538	948538	+	3UTR	AMD2	YDR242W	sense	948538	948543	5	3.20661	2.04057	1	2	2.40543
chrIV	992766	992766	+	tRNA_100_nt_upstream	INT_0_1774	INT_0_1774	sense	992706	992781	75	32.6491	13.4095	13	11	16.4816
chrIV	992828	992828	+	tRNA_100_nt_upstream	INT_0_1774	INT_0_1774	sense	992803	992829	26	4.66416	2.04057	0	2	2.9151
chrIV	1013043	1013043	+	3UTR	BSC2	YDR275W	sense	1013043	1013074	31	3.20661	2.33208	16	2	2.62359
chrIV	1023104	1023104	+	intergenic_region	INT_0_1804	INT_0_1804	sense	1023033	1023179	146	20.4057	2.04057	117	32	9.2208
chrIV	1144953	1144952	+	3UTR	MSN5	YDR335W	sense	1144952	1144953	1	12.5349	10.2029	-1	1	2.33208
chrIV	1146133	1146138	+	3UTR	YDR336W	YDR336W	sense	1146133	1146154	21	6.12171	2.04057	10	5	5.34539
chrIV	1162933	1162933	+	SUTs	XUT_4F-524	571825	sense	1162926	1162946	20	10.2029	2.62359	9	9	2.27179
chrIV	1202044	1202044	+	intergenic_region	INT_0_1927	INT_0_1927	sense	1202044	1202062	18	6.12171	4.37265	2	2	5.8302
chrIV	1202529	1202519	+	3UTR	SEM1	YDR363W-A	sense	1202519	1202536	17	11.0774	3.78963	12	9	2.03969
chrIV	1241138	1241147	+	intergenic_region	INT_0_1956	INT_0_1956	sense	1241130	1241216	86	18.3651	3.20661	43	17	18.0736
chrIV	1243225	1243225	+	5UTR	EFT2	YDR385W	sense	1243151	1243276	125	26.2359	3.49812	90	32	4.3555
chrIV	1254974	1254974	+	3UTR	SAC7	YDR389W	sense	1254972	1254996	24	6.12171	3.78963	3	4	4.45449
chrIV	1270357	1270212	+	CDS	HPT1	YDR399W	sense	1270026	1270484	458	127.681	3.78963	310	156	72.831
chrIV	1302683	1302699	+	CUTs	CUT091	ST0731	sense	1302663	1302762	99	31.4831	6.12171	48	23	4.67722
chrIV	1319758	1319758	+	CUTs	CUT092	ST0735	sense	1319641	1319846	205	46.9331	2.62359	99	51	23.7573
chrIV	1323469	1323469	+	3UTR	RPN9	YDR427W	sense	1323469	1323471	2	7.87077	5.8302	0	2	2.13816
chrIV	1324425	1324425	+	CUTs	CUT093	ST0738	sense	1324409	1324455	46	7.28775	3.20661	12	10	6.99624
chrIV	1330789	1330788	+	intergenic_region	INT_0_2020	INT_0_2020	sense	1330766	1330806	40	27.4019	10.2029	4	6	27.1104
chrIV	1385431	1385431	+	3UTR	MFA1	YDR461W	sense	1385422	1385452	30	18.6566	10.2029	3	4	9.35444
chrIV	1388577	1388562	+	3UTR	STP1	YDR463W	sense	1388562	1388577	15	21.2802	16.6161	0	2	3.05451
chrIV	1403066	1403163	+	snoRNA_1000_nt_downstream	INT_0_2071	INT_0_2071	antisense	1403012	1403462	450	3389.1	283.931	219	183	51.9567
chrIV	1414384	1414391	+	3UTR	SNF1	YDR477W	sense	1414379	1414401	22	15.1585	4.37265	18	9	2.61195
chrIV	1422641	1422641	+	3UTR	INT_0_2087	INT_0_2087	sense	1422641	1422643	2	3.20661	2.33208	1	2	2.13816
chrIV	1456720	1456720	+	antisense_CDS	SUT078	ST0779	sense	1456720	1456721	1	2.33208	2.33208	-1	1	2.33208
chrXIV	10631	10626	+	intergenic_region	INT_0_6974	INT_0_6974	sense	10613	10648	35	13.701	3.20661	20	13	10.2453
chrXIV	88871	88869	+	3UTR	PCL1	YNL289W	sense	88867	88874	7	13.118	6.41322	3	5	2.19161
chrXIV	89136	89138	+	snoRNA_300_nt_upstream	INT_0_7030	INT_0_7030	sense	89134	89162	28	816.228	329.115	4	6	25.6194
chrXIV	89306	89321	+	snoRNA	SNR40	snR40	sense	89306	89382	76	113.98	62.9662	61	27	8.14337
chrXIV	109098	109095	+	3UTR	HCH1	YNL281W	sense	109096	109098	2	14.5755	10.4944	0	2	2.07876
chrXIV	109102	109104	+	3UTR	HCH1	YNL281W	sense	109099	109107	8	8.16228	2.33208	4	6	2.40543
chrXIV	161394	161394	+	XUTs	XUT_14F-52	572835	sense	161394	161395	1	2.62359	2.33208	-1	1	2.33208
chrXIV	198512	198512	+	CUTs	CUT321	ST2759	sense	198475	198555	80	11.6604	2.9151	46	18	11.3689
chrXIV	229924	229992	+	3UTR	SSU72	YNL222W	sense	229897	229997	100	14.284	3.20661	67	15	2.7889
chrXIV	234258	234258	+	CUTs	CUT325	ST2773	sense	234258	234276	18	57.719	38.4793	2	4	5.26521
chrXIV	241416	241413	+	3UTR	YNL217W	YNL217W	sense	241414	241416	2	13.118	6.12171	1	3	3.56359
chrXIV	244308	244308	+	3UTR	RAP1	YNL216W	sense	244308	244309	1	2.9151	2.33208	0	2	2.33208
chrXIV	255163	255164	+	intergenic_region	INT_0_7145	INT_0_7145	sense	255163	255202	39	10.7859	2.62359	8	7	3.20724
chrXIV	278076	278076	+	CDS	CHS1	YNL192W	sense	278076	278077	1	2.62359	2.62359	-1	1	2.62359
chrXIV	282125	282227	+	5UTR	INT_0_7164	INT_0_7164	sense	282121	282417	296	137.01	5.8302	150	110	34.8193
chrXIV	303448	303447	+	3UTR	RPS3	YNL178W	sense	303445	303448	3	9.61983	6.70473	0	2	2.9151
chrXIV	308248	308248	+	CDS	YNL174W	YNL174W	sense	308184	308294	110	16.6161	3.78963	77	18	16.3246
chrXIV	322198	322206	+	intergenic_region	INT_0_7190	INT_0_7190	sense	322198	322296	98	9.03681	2.04057	60	8	4.45449
chrXIV	330921	330933	+	3UTR	YNL162W-A	YNL162W-A	sense	330919	330941	22	17.7821	5.8302	11	7	2.35826
chrXIV	340917	340917	+	3UTR	IGO1	YNL157W	sense	340917	340920	3	6.12171	2.33208	2	4	2.13816
chrXIV	343468	343510	+	3UTR	YNL155W	YNL155W	sense	343466	343511	45	20.9887	5.53869	29	14	2.23761
chrXIV	352704	352704	+	3UTR	MFA2	YNL145W	sense	352701	352710	9	7.28775	3.20661	2	4	6.99624
chrXIV	357447	357444	+	5UTR	MEP2	YNL142W	sense	357444	357447	3	14.284	11.0774	0	2	3.20661
chrXIV	357460	357476	+	CDS	MEP2	YNL142W	sense	357448	357583	135	50.7227	4.08114	53	44	5.25428
chrXIV	415761	415722	+	intron	YNL112W_intron	intergenic	sense	415545	415786	241	102.32	36.1472	194	51	7.42416
chrXIV	416464	416464	+	intergenic_region	INT_0_7267	INT_0_7267	sense	416464	416485	21	7.28775	2.62359	14	8	6.41447
chrXIV	442940	442940	+	tRNA_100_nt_upstream	INT_0_7287	INT_0_7287	sense	442906	442956	50	10.2029	5.53869	9	6	9.91134
chrXIV	454598	454598	+	CDS	NST1	YNL091W	sense	454598	454608	10	3.49812	2.33208	9	3	2.62359
chrXIV	500675	500661	+	CUTs	CUT337	ST2871	sense	500575	500830	255	113.106	14.5755	98	55	10.1405
chrXIV	525798	525798	+	intergenic_region	INT_0_7351	INT_0_7351	sense	525795	525823	28	5.53869	2.62359	7	5	5.24718
chrXIV	568046	568046	+	tRNA_100_nt_upstream	INT_0_7382	INT_0_7382	sense	568006	568054	48	13.9925	2.9151	14	10	13.701
chrXIV	585921	585919	+	snoRNA	NME1	NME1	sense	585853	585984	131	371.967	46.3501	28	30	20.0452
chrXIV	586174	586278	+	snoRNA	SNR66	snR66	sense	586174	586388	214	552.12	41.1029	199	140	54.1802
chrXIV	586429	586466	+	snoRNA_1000_nt_downstream	CUT342	ST2901	sense	586410	586733	323	292.968	13.118	185	141	149.077
chrXIV	587201	587201	+	CUTs	CUT343	ST2902	sense	587197	587213	16	2.9151	2.33208	11	2	2.62359
chrXIV	587346	587346	+	SUTs	SUT335	ST2903	sense	587292	587456	164	30.317	3.49812	93	41	29.734
chrXIV	602247	602246	+	tRNA_100_nt_upstream	INT_0_7415	INT_0_7415	sense	602237	602251	14	9.03681	3.49812	4	6	8.7453
chrXIV	614529	614529	+	3UTR	YNL010W	YNL010W	sense	614527	614540	13	6.99624	2.04057	10	6	4.45449
chrXIV	647033	647033	+	intergenic_region	INT_0_7456	INT_0_7456	sense	647019	647038	19	4.37265	2.04057	6	4	4.08114
chrXIV	716307	716333	+	snoRNA_1000_nt_downstream	INT_0_7504	INT_0_7504	sense	716288	716721	433	1340.65	132.637	188	153	41.7995
chrXIV	726001	726015	+	XUTs	XUT_14F-289	572867	sense	726001	726016	15	11.6604	3.49812	13	6	2.42972
chrXII	67671	67671	+	3UTR	YLL037W	YLL037W	sense	67671	67743	72	8.7453	4.08114	44	8	8.45379
chrXII	84608	84608	+	intergenic_region	INT_0_5554	INT_0_5554	sense	84593	84609	16	2.33208	2.04057	-1	1	2.33208
chrXII	99053	99053	+	CUTs	CUT246	ST2136	sense	99005	99070	65	9.61983	2.33208	57	16	9.03681
chrXII	150342	150342	+	3UTR	DNM1	YLL001W	sense	150342	150358	16	6.12171	2.62359	6	2	2.53906
chrXII	168886	168886	+	intergenic_region	INT_0_5607	INT_0_5607	sense	168803	168949	146	19.2397	3.78963	79	34	14.4771
chrXII	188746	188745	+	CUTs	CUT250	ST2162	sense	188648	188889	241	28.8595	2.9151	114	45	14.4029
chrXII	199498	199532	+	snoRNA_1000_nt_downstream	INT_0_5631	INT_0_5631	sense	199258	199786	528	1538.59	56.8445	180	163	33.9034
chrXII	225275	225275	+	intergenic_region	INT_0_5651	INT_0_5651	sense	225244	225352	108	16.3246	4.95567	32	13	3.06246
chrXII	231677	231664	+	intergenic_region	INT_0_5659	INT_0_5659	sense	231538	231788	250	114.563	7.87077	98	68	15.8742
chrXII	235670	235740	+	SUTs	SUT252	ST2174	sense	235617	235756	139	12.8264	2.9151	99	16	8.209
chrXII	257940	257944	+	3UTR	YLR057W	YLR057W	sense	257938	257947	9	11.0774	3.49812	6	6	2.42213
chrXII	260794	260794	+	5UTR	SUT255	ST2183	sense	260794	260841	47	12.8264	3.78963	15	9	12.5349
chrXII	263593	263579	+	intron	YLR061W_intron	intergenic	sense	263509	263601	92	31.4831	4.37265	43	24	31.1916
chrXII	366344	366340	+	snRNA	SNR6	snR6	sense	366285	366655	370	2528.27	371.384	14	16	56.8079
chrXII	371593	371552	+	3UTR	YLR112W	YLR112W	sense	371544	371593	49	15.7415	4.37265	40	12	2.89542
chrXII	371627	371627	+	3UTR	YLR112W	YLR112W	sense	371594	371744	150	28.2765	2.33208	104	41	3.28947
chrXII	374245	374245	+	intergenic_region	INT_0_5752	INT_0_5752	sense	374245	374291	46	7.57926	2.33208	39	10	4.17609
chrXII	388693	388693	+	CDS	YLR120W-A	YLR120W-A	sense	388601	388694	93	19.5312	14.284	8	5	14.9226
chrXII	388799	388799	+	3UTR	YLR120W-A	YLR120W-A	sense	388716	389321	605	159.164	5.53869	390	192	19.684
chrXII	429515	429515	+	3UTR	YLR143W	YLR143W	sense	429515	429516	1	2.04057	2.04057	-1	1	2.04057
chrXII	434152	434273	+	3UTR	YLR146W-A	YLR146W-A	sense	434150	434353	203	30.9001	4.37265	140	41	3.26318
chrXII	450753	450777	+	intergenic_region	SUT264	ST2248	sense	450684	450823	139	22.1548	2.9151	81	22	14.1271
chrXII	459928	459928	+	intergenic_region	INT_0_5819	INT_0_5819	sense	459878	459986	108	36.4388	2.04057	82	52	16.5707
chrXII	460085	460085	+	XUTs	XUT_12F-188	572606	sense	460048	460146	98	17.7821	2.04057	66	21	2.96966
chrXII	460591	460556	+	XUTs	XUT_12F-188	572606	sense	460409	460618	209	1043.9	144.297	72	70	44.7115
chrXII	499532	499530	+	intergenic_region	INT_0_5850	INT_0_5850	sense	499530	499535	5	12.2434	4.37265	3	5	2.19161
chrXII	542392	542414	+	CUTs	CUT265	ST2269	sense	542169	542579	410	49.2652	2.04057	241	82	11.2253
chrXII	543288	543287	+	XUTs	XUT_12F-209	572611	sense	543262	543301	39	31.4831	8.45379	10	11	8.76978
chrXII	546181	546181	+	CDS	NOP56	YLR197W	sense	546181	546193	12	3.20661	2.33208	2	2	2.9151
chrXII	547479	547479	+	CDS	NOP56	YLR197W	sense	547479	547480	1	2.62359	2.62359	-1	1	2.62359
chrXII	549274	549274	+	CDS	YKE2	YLR200W	sense	549274	549275	1	2.04057	2.04057	-1	1	2.04057
chrXII	591745	591744	+	XUTs	XUT_12F-231	572615	sense	591744	591758	14	14.867	5.8302	6	7	2.97641
chrXII	599042	599042	+	intergenic_region	INT_0_5919	INT_0_5919	sense	599042	599047	5	3.20661	2.33208	2	2	2.62359
chrXII	659671	659671	+	CDS	YLR257W	YLR257W	sense	659671	659672	1	2.33208	2.33208	-1	1	2.33208
chrXII	669436	669436	+	intergenic_region	SUT279	ST2307	sense	669325	669575	250	67.9218	5.53869	116	63	14.7635
chrXII	705182	705182	+	5UTR	INT_0_6002	INT_0_6002	sense	705182	705190	8	3.78963	2.9151	0	2	3.49812
chrXII	716862	716862	+	CDS	GUF1	YLR289W	sense	716862	716863	1	2.33208	2.33208	-1	1	2.33208
chrXII	719869	719841	+	CUTs	CUT269	ST2322	sense	719789	720005	216	88.036	6.41322	106	67	57.463
chrXII	797112	797111	+	tRNA_100_nt_upstream	INT_0_6075	INT_0_6075	sense	797090	797124	34	20.4057	5.53869	8	7	20.1142
chrXII	805606	805606	+	intergenic_region	INT_0_6086	INT_0_6086	sense	805530	805650	120	24.7784	3.49812	55	25	24.4868
chrXII	815934	815934	+	CDS	YLR342W-A	YLR342W-A	sense	815931	815984	53	14.5755	3.20661	31	13	2.42522
chrXII	816114	816114	+	3UTR	YLR342W-A	YLR342W-A	sense	816114	816145	31	10.2029	4.95567	10	5	3.39227
chrXII	827075	827080	+	antisense_CDS	INT_0_6099	INT_0_6099	sense	826999	827216	217	67.3388	2.9151	84	61	67.0473
chrXII	836328	836342	+	3UTR	BUD8	YLR353W	sense	836328	836369	41	9.91134	3.78963	13	6	2.25069
chrXII	840113	840129	+	CUTs	CUT273	ST2352	sense	839950	840280	330	68.5049	4.95567	137	67	25.9474
chrXII	856095	856095	+	5UTR	RPS22B	YLR367W	sense	856006	856137	131	666.1	325.617	8	10	84.7467
chrXII	856940	856969	+	snoRNA_1000_nt_downstream	YLR367W_intron	intergenic	sense	856922	857073	151	268.189	149.253	113	48	40.9368
chrXII	899406	899471	+	snoRNA_1000_nt_downstream	ECM19	YLR390W	sense	899373	900140	767	2358.9	318.912	189	170	73.5537
chrXII	912432	912431	+	CUTs	CUT276	ST2380	sense	912415	912492	77	6.41322	2.62359	54	6	6.12171
chrXII	1002511	1002513	+	5UTR	IMD3	YLR432W	sense	1002369	1002709	340	698.166	61.2171	94	85	72.7095
chrXII	1007184	1007179	+	3UTR	TSR2	YLR435W	sense	1007165	1007191	26	16.6161	4.37265	10	9	2.13816
chrXII	1057196	1057196	+	intergenic_region	INT_0_6257	INT_0_6257	sense	1057192	1057197	5	2.62359	2.33208	-1	1	2.62359
chrV	10318	10318	+	CUTs	CUT103	ST0806	sense	10318	10327	9	2.62359	2.04057	0	2	2.33208
chrV	45040	45040	+	3UTR	PCM1	YEL058W	sense	45039	45092	53	7.28775	2.62359	45	12	4.58176
chrV	61172	61178	+	snoRNA_300_nt_upstream	INT_0_2575	INT_0_2575	sense	61112	61332	220	216.009	33.8152	12	13	17.98
chrV	61602	61525	+	snoRNA_1000_nt_downstream	INT_0_2577	INT_0_2577	sense	61405	61621	216	1692.22	246.617	169	97	84.3061
chrV	61813	61823	+	snoRNA_1000_nt_downstream	INT_0_2578	INT_0_2578	sense	61769	61924	155	699.916	154.5	39	38	213.816
chrV	62167	62167	+	snoRNA_1000_nt_downstream	INT_0_2578	INT_0_2578	sense	62120	62216	96	14.867	4.08114	30	8	13.3635
chrV	78063	78063	+	3UTR	YEF1	YEL041W	sense	78061	78074	13	6.12171	2.9151	10	3	2.6727
chrV	85258	85265	+	antisense_CDS	INT_0_2593	INT_0_2593	sense	85238	85343	105	51.8888	16.9076	31	24	19.7111
chrV	100067	100067	+	tRNA_100_nt_upstream	INT_0_2606	INT_0_2606	sense	100063	100069	6	2.9151	2.04057	1	2	2.33208
chrV	117027	117025	+	3UTR	URA3	YEL021W	sense	117025	117027	2	23.3208	20.6972	-1	1	2.62359
chrV	131511	131511	+	intergenic_region	INT_0_2630	INT_0_2630	sense	131497	131517	20	9.32832	4.95567	1	3	9.03681
chrV	227069	227068	+	3UTR	PHM8	YER037W	sense	227068	227069	1	35.2727	32.9406	-1	1	2.33208
chrV	239020	239058	+	CUTs	CUT109	ST0883	sense	238778	239202	424	68.5049	2.04057	288	110	68.2133
chrV	250221	250221	+	tRNA_100_nt_upstream	INT_0_2733	INT_0_2733	sense	250205	250235	30	22.4463	7.87077	5	7	21.8633
chrV	269423	269394	+	SUTs	XUT_5F-128	571968	sense	269335	269577	242	160.331	49.5567	37	34	3.42829
chrV	271614	271614	+	XUTs	XUT_5F-129	571969	sense	271614	271618	4	2.9151	2.04057	2	3	2.40543
chrV	284487	284487	+	SUTs	XUT_5F-139	571971	sense	284487	284506	19	3.20661	2.62359	-1	1	2.9151
chrV	290937	290934	+	3UTR	RRT13	YER066W	sense	290923	290941	18	16.0331	6.12171	6	5	2.82118
chrV	378854	378854	+	antisense_CDS	INT_0_2851	INT_0_2851	sense	378854	378862	8	3.49812	2.33208	4	3	3.20661
chrV	397841	397839	+	intergenic_region	INT_0_2859	INT_0_2859	sense	397839	397841	2	27.4019	23.6123	-1	1	2.17157
chrV	425130	425106	+	snoRNA_1000_nt_downstream	INT_0_2879	INT_0_2879	sense	424882	425868	986	2336.74	182.485	319	283	25.9342
chrV	438629	438629	+	tRNA_100_nt_upstream	INT_0_2893	INT_0_2893	sense	438617	438635	18	6.70473	3.20661	11	5	6.12171
chrV	441930	441930	+	3UTR	YER137W-A	YER137W-A	sense	441897	441934	37	6.41322	2.04057	8	6	6.12171
chrV	442501	442317	+	ncRNA	SCR1	SCR1	sense	442024	442519	495	1791.62	133.803	407	366	10.4477
chrV	442584	442584	+	intergenic_region	INT_0_2898	INT_0_2898	sense	442558	442683	125	26.2359	2.04057	71	31	25.9444
chrV	461857	461857	+	XUTs	XUT_5F-218	571984	sense	461855	461867	12	4.66416	2.33208	4	3	4.37265
chrV	469389	469387	+	tRNA_100_nt_upstream	INT_0_2920	INT_0_2920	sense	469384	469399	15	6.99624	2.33208	4	3	6.70473
chrV	484751	484723	+	intergenic_region	INT_0_2930	INT_0_2930	sense	484640	484944	304	51.3058	4.66416	173	62	7.30815
chrV	504835	504834	+	SUTs	XUT_5F-239	571989	sense	504802	504848	46	23.6123	12.2434	12	10	10.6908
chrV	510287	510286	+	5UTR	PAB1	YER165W	sense	510253	510308	55	18.0736	2.33208	35	21	17.4906
chrV	566842	566842	+	3UTR	YER187W	YER187W	sense	566842	566844	2	2.9151	2.62359	-1	1	2.62359
chrV	566906	566895	+	intergenic_region	INT_0_2990	INT_0_2990	sense	566872	566906	34	15.45	5.24718	24	11	9.35444
chrII	24830	24830	-	3UTR	ECM21	YBL101C	sense	24817	24831	14	3.20661	2.04057	12	2	3.20661
chrII	167735	167733	-	CDS	YBL028C	YBL028C	sense	167733	167735	2	6.41322	4.08114	1	2	2.33208
chrII	176169	176169	-	CDS	MCM2	YBL023C	sense	176169	176170	1	2.33208	2.33208	-1	1	2.33208
chrII	235103	235115	-	antisense_CDS	INT_0_361	INT_0_361	sense	235096	235196	100	76.3756	9.03681	88	53	2.04011
chrII	235718	235699	-	CDS	HTA2	YBL003C	sense	235486	235723	237	100.279	5.8302	121	88	38.0859
chrII	235780	235772	-	CDS	HTA2	YBL003C	sense	235745	235810	65	40.5199	7.28775	36	30	8.38255
chrII	266564	266472	-	intergenic_region	INT_0_391	INT_0_391	sense	266472	266590	118	21.8633	3.49812	112	25	2.28586
chrII	301261	301261	-	intergenic_region	INT_0_416	INT_0_416	sense	301242	301281	39	4.66416	2.33208	8	4	4.37265
chrII	307100	307138	-	snoRNA_1000_nt_downstream	CUT447	ST3762	sense	306931	307209	278	390.915	70.8369	73	53	179.071
chrII	356755	356751	-	3UTR	INT_0_468	INT_0_468	sense	356751	356755	4	9.32832	6.12171	3	3	3.20661
chrII	390160	390143	-	3UTR	XUT_2R-172	571674	sense	390051	390171	120	31.1916	7.87077	82	20	9.35444
chrII	391165	391101	-	3UTR	YBR076C-A	YBR076C-A	sense	390937	391327	390	235.832	23.3208	190	134	3.80527
chrII	398477	398477	-	3UTR	INT_0_501	INT_0_501	sense	398477	398480	3	4.37265	2.33208	2	3	2.62359
chrII	418515	418515	-	3UTR	INT_0_515	INT_0_515	sense	418515	418516	1	4.95567	3.49812	0	2	3.49812
chrII	427053	427031	-	3UTR	YBR090C	YBR090C	sense	427031	427053	22	39.3539	21.8633	20	12	2.42972
chrII	457584	457576	-	antisense_CDS	INT_0_540	INT_0_540	sense	457556	457660	104	22.7378	4.66416	65	25	2.14372
chrII	457734	457730	-	3UTR	INT_0_540	INT_0_540	sense	457730	457735	5	10.4944	3.78963	4	5	2.25509
chrII	486841	486841	-	antisense_CDS	INT_0_561	INT_0_561	sense	486833	486861	28	6.70473	2.62359	4	4	3.67496
chrII	486993	486989	-	intergenic_region	INT_0_561	INT_0_561	sense	486989	486993	4	5.53869	2.62359	3	4	2.9151
chrII	534834	534834	-	XUTs	XUT_2R-226	571678	sense	534834	534870	36	3.78963	2.33208	28	3	3.20661
chrII	549264	549240	-	CUTs	CUT456	ST3840	sense	549090	549315	225	58.302	9.91134	123	58	16.6208
chrII	571363	571358	-	3UTR	INT_0_615	INT_0_615	sense	571358	571363	5	5.53869	2.9151	4	3	2.40543
chrII	612162	612162	-	3UTR	PGI1	YBR196C	sense	612162	612173	11	2.9151	2.04057	8	3	2.62359
chrII	679387	679381	-	3UTR	INT_0_701	INT_0_701	sense	679377	679387	10	43.7265	22.7378	2	4	2.53203
chrII	680691	680690	-	snRNA	LSR1	LSR1	sense	680674	680692	18	32.0661	20.6972	2	4	2.74979
chrII	680961	680714	-	snRNA	LSR1	LSR1	sense	680696	680961	265	604.883	494.109	-1	1	3.70666
chrII	697422	697422	-	5UTR	INT_0_714	INT_0_714	antisense	697416	697426	10	4.08114	2.04057	5	4	3.49812
chrII	723142	723142	-	intergenic_region	INT_0_738	INT_0_738	sense	723138	723174	36	4.66416	2.33208	4	3	4.37265
chrII	791895	791895	-	SUTs	XUT_2R-343	571693	sense	791895	791898	3	2.33208	2.04057	-1	1	2.04057
chrII	792034	792034	-	SUTs	XUT_2R-343	571693	sense	792034	792035	1	4.66416	4.66416	-1	1	4.66416
chrXIII	14332	14331	-	3UTR	INT_0_6275	INT_0_6275	sense	14332	14337	5	3.20661	2.9151	-1	1	2.9151
chrXIII	39931	39927	-	3UTR	INT_0_6294	INT_0_6294	sense	39926	39931	5	5.53869	3.20661	3	2	2.33208
chrXIII	45929	45918	-	CUTs	XUT_13R-20	572770	sense	45900	45982	82	20.6972	5.53869	41	16	6.68174
chrXIII	67697	67712	-	snoRNA_1000_nt_downstream	INT_0_6315	INT_0_6315	sense	67515	67769	254	327.366	99.1134	58	52	41.6495
chrXIII	110414	110414	-	CUTs	CUT760	ST6165	sense	110290	110501	211	33.8152	3.20661	113	44	33.5237
chrXIII	153202	153202	-	3UTR	OGG1	YML060W	antisense	153201	153219	18	4.95567	2.62359	1	3	4.66416
chrXIII	163308	163314	-	snoRNA_1000_nt_downstream	IMD4	YML056C	sense	163290	163465	175	315.997	93.8662	18	19	68.9174
chrXIII	163509	163511	-	snoRNA_1000_nt_downstream	YML056C_intron	intergenic	sense	163491	163537	46	222.422	90.0766	25	20	72.1628
chrXIII	171470	171470	-	intergenic_region	SUT719	ST6184	sense	171470	171481	11	3.78963	2.33208	2	3	3.20724
chrXIII	196237	196237	-	tRNA_100_nt_upstream	INT_0_6409	INT_0_6409	sense	196228	196306	78	11.3689	2.9151	38	12	11.0774
chrXIII	222916	222915	-	3UTR	RPS18B	YML026C	sense	222915	222916	1	4.66416	2.62359	0	2	2.04057
chrXIII	258689	258689	-	XUTs	XUT_13R-108	572779	sense	258689	258691	2	10.4944	4.08114	1	3	3.60814
chrXIII	259303	259302	-	tRNA_100_nt_upstream	INT_0_6455	INT_0_6455	sense	259303	259305	2	5.24718	4.08114	1	2	4.08114
chrXIII	261555	261537	-	3UTR	INT_0_6456	INT_0_6456	sense	261534	261555	21	11.0774	6.99624	17	5	3.11815
chrXIII	321284	321284	-	tRNA_100_nt_upstream	INT_0_6510	INT_0_6510	sense	321282	321301	19	6.12171	2.33208	5	5	4.81085
chrXIII	352480	352508	-	CUTs	CUT767	ST6236	sense	352476	352577	101	17.4906	2.9151	75	20	8.7605
chrXIII	412937	412925	-	3UTR	INT_0_6579	INT_0_6579	sense	412925	412938	13	18.0736	6.12171	11	9	2.0587
chrXIII	433086	433086	-	CUTs	CUT773	ST6258	sense	433086	433106	20	6.12171	2.04057	3	4	4.45449
chrXIII	463670	463656	-	intergenic_region	INT_0_6616	INT_0_6616	sense	463635	463794	159	56.5529	10.2029	88	34	2.29609
chrXIII	499880	499888	-	snoRNA_1000_nt_downstream	ASC1	YMR116C	sense	499861	499985	124	455.339	169.95	81	57	115.817
chrXIII	502077	502076	-	intergenic_region	INT_0_6646	INT_0_6646	sense	502061	502083	22	6.70473	3.49812	6	6	4.45449
chrXIII	554469	554466	-	3UTR	INT_0_6685	INT_0_6685	sense	554466	554583	117	32.0661	4.08114	91	30	2.32218
chrXIII	556539	556475	-	5UTR	NDE1	YMR145C	sense	556306	556552	246	72.8775	8.16228	126	60	3.5399
chrXIII	640602	640602	-	antisense_CDS	INT_0_6759	INT_0_6759	sense	640602	640628	26	4.66416	2.04057	16	4	4.00904
chrXIII	649460	649446	-	CUTs	INT_0_6762	INT_0_6762	sense	649385	649637	252	54.8039	3.49812	137	68	54.5124
chrXIII	654430	654440	-	XUTs	XUT_13R-293	572810	sense	654411	654486	75	19.5312	2.62359	42	18	2.93997
chrXIII	667219	667224	-	5UTR	RAD14	YMR201C	sense	667216	667274	58	33.2321	4.08114	22	18	10.6908
chrXIII	709991	709991	-	antisense_CDS	INT_0_6803	INT_0_6803	sense	709991	710003	12	5.53869	2.62359	7	5	5.24718
chrXIII	720757	720757	-	3UTR	INT_0_6810	INT_0_6810	sense	720757	720762	5	3.78963	2.33208	4	2	2.33208
chrXIII	725822	725820	-	intergenic_region	INT_0_6814	INT_0_6814	sense	725820	725822	2	12.2434	9.03681	0	2	2.09998
chrXIII	744883	744881	-	antisense_CDS	INT_0_6826	INT_0_6826	sense	744855	744900	45	17.4906	6.12171	18	11	16.0331
chrXIII	752913	752913	-	intergenic_region	INT_0_6832	INT_0_6832	sense	752894	752915	21	3.49812	2.62359	2	2	3.20661
chrXIII	758817	758816	-	CDS	YMR244C-A	YMR244C-A	sense	758816	758840	24	24.1953	6.41322	19	14	2.13816
chrXIII	762083	762036	-	snoRNA_1000_nt_downstream	INT_0_6842	INT_0_6842	sense	761702	762162	460	1164.58	237.289	171	143	23.3073
chrXIII	789295	789291	-	3UTR	TIF11	YMR260C	sense	789291	789295	4	24.1953	19.5312	-1	1	2.6727
chrXIII	914808	914808	-	CUTs	CUT793	ST6405	sense	914808	914809	1	2.04057	2.04057	-1	1	2.04057
chrI	45575	45575	-	intergenic_region	INT_0_83	INT_0_83	sense	45569	45582	13	2.9151	2.04057	5	2	2.62359
chrI	57867	57875	-	3UTR	INT_0_92	INT_0_92	sense	57710	57890	180	518.596	107.859	14	16	2.50759
chrI	80247	80247	-	antisense_CDS	INT_0_112	INT_0_112	sense	80220	80250	30	6.12171	2.62359	8	7	5.53869
chrI	84589	84589	-	3UTR	PRP45	YAL032C	sense	84588	84594	6	3.49812	2.33208	4	2	2.62359
chrI	100355	100355	-	CDS	MAK16	YAL025C	sense	100348	100359	11	4.95567	2.04057	6	3	2.50565
chrI	134092	134092	-	3UTR	MDM10	YAL010C	sense	134092	134126	34	6.41322	3.49812	4	3	2.15872
chrI	139314	139314	-	3UTR	INT_0_146	INT_0_146	sense	139290	139315	25	6.41322	2.9151	17	9	4.89994
chrVIII	34514	34513	-	intergenic_region	INT_0_4044	INT_0_4044	sense	34509	34563	54	41.3944	13.118	19	11	2.47928
chrVIII	34693	34693	-	intergenic_region	INT_0_4044	INT_0_4044	sense	34692	34712	20	9.91134	2.9151	6	6	3.14996
chrVIII	34739	34739	-	3UTR	INT_0_4044	INT_0_4044	sense	34728	34761	33	233.208	98.2389	5	6	2.38047
chrVIII	94989	94989	-	3UTR	INT_0_4085	INT_0_4085	sense	94989	94996	7	8.16228	3.78963	6	5	2.18675
chrVIII	116795	116795	-	intergenic_region	INT_0_4109	INT_0_4109	sense	116765	116869	104	12.2434	3.49812	69	14	7.82718
chrVIII	147660	147668	-	intergenic_region	INT_0_4134	INT_0_4134	sense	147640	147695	55	12.2434	2.04057	22	10	3.42439
chrVIII	168721	168721	-	3UTR	INT_0_4149	INT_0_4149	sense	168721	168723	2	4.08114	2.04057	1	3	2.33208
chrVIII	168734	168730	-	3UTR	INT_0_4149	INT_0_4149	sense	168730	168734	4	85.7039	77.2502	-1	1	3.5231
chrVIII	290823	290822	-	3UTR	CUT648	ST5174	sense	290822	290823	1	25.9444	23.6123	-1	1	2.33208
chrVIII	326643	326643	-	3UTR	INT_0_4268	INT_0_4268	sense	326643	326647	4	3.49812	2.04057	3	3	2.13816
chrVIII	354379	354379	-	SUTs	XUT_8R-172	572285	sense	354353	354385	32	4.08114	2.04057	21	5	3.78963
chrVIII	381107	381078	-	CUTs	CUT650	ST5198	sense	380866	381198	332	36.7303	4.08114	175	56	33.4087
chrVIII	429601	429594	-	intergenic_region	INT_0_4357	INT_0_4357	sense	429579	429601	22	9.91134	3.78963	8	6	2.33861
chrVIII	441686	441686	-	CUTs	CUT653	ST5218	sense	441585	441768	183	26.5274	2.62359	136	45	26.2359
chrVIII	450373	450373	-	CUTs	CUT655	ST5220	sense	450133	450548	415	53.0548	4.08114	206	82	15.1174
chrVIII	487652	487651	-	3UTR	CUT657	ST5231	sense	487652	487653	1	2.9151	2.33208	0	2	2.33208
chrVIII	543569	543569	-	intergenic_region	INT_0_4441	INT_0_4441	sense	543569	543570	1	2.04057	2.04057	-1	1	2.04057
chrXV	17098	17095	-	3UTR	INT_0_7573	INT_0_7573	sense	17095	17098	3	9.32832	6.70473	2	3	2.62359
chrXV	40688	40688	-	intergenic_region	INT_0_7590	INT_0_7590	sense	40684	40709	25	4.95567	3.49812	2	2	3.56359
chrXV	70975	70975	-	intergenic_region	INT_0_7613	INT_0_7613	sense	70964	70976	12	4.37265	2.62359	7	4	4.37265
chrXV	71544	71544	-	XUTs	XUT_15R-47	573015	sense	71540	71545	5	2.62359	2.04057	0	2	2.62359
chrXV	81574	81574	-	3UTR	INT_0_7622	INT_0_7622	sense	81574	81601	27	5.8302	2.62359	26	6	4.37265
chrXV	93219	93190	-	intergenic_region	INT_0_7634	INT_0_7634	sense	93190	93222	32	27.1104	12.8264	9	8	2.1609
chrXV	94157	94157	-	intron	YOL120C_intron	intergenic	sense	94121	94197	76	592.057	291.802	3	5	108.511
chrXV	101035	101035	-	CUTs	XUT_15R-66	573021	sense	101028	101119	91	12.2434	2.33208	42	16	3.42439
chrXV	136062	136042	-	snoRNA_1000_nt_downstream	INT_0_7666	INT_0_7666	sense	135672	136105	433	776	110.191	173	133	177.801
chrXV	153750	153750	-	3UTR	INT_0_7681	INT_0_7681	sense	153750	153766	16	4.66416	2.33208	11	5	2.17157
chrXV	231850	231842	-	3UTR	INT_0_7736	INT_0_7736	sense	231805	231856	51	20.9887	7.28775	19	7	3.79523
chrXV	252879	252879	-	intergenic_region	INT_0_7754	INT_0_7754	sense	252879	252880	1	2.62359	2.62359	-1	1	2.62359
chrXV	267699	267699	-	intergenic_region	INT_0_7768	INT_0_7768	sense	267654	267788	134	20.4057	7.28775	72	21	13.1726
chrXV	294511	294511	-	antisense_CDS	INT_0_7785	INT_0_7785	sense	294505	294524	19	4.66416	2.04057	5	5	4.37265
chrXV	310866	310866	-	3UTR	INT_0_7798	INT_0_7798	sense	310849	310867	18	3.78963	2.33208	15	3	3.78963
chrXV	313464	313464	-	CDS	TOP1	YOL006C	sense	313458	313467	9	6.41322	2.33208	7	4	4.45449
chrXV	315689	315689	-	3UTR	INT_0_7803	INT_0_7803	sense	315685	315753	68	55.0954	20.4057	61	23	2.16841
chrXV	338773	338773	-	3UTR	INT_0_7821	INT_0_7821	sense	338773	338777	4	4.66416	2.04057	3	4	2.22725
chrXV	356193	356193	-	SUTs	XUT_15R-169	573033	sense	356101	356196	95	19.2397	3.49812	51	21	5.10957
chrXV	371111	371078	-	SUTs	INT_0_7848	INT_0_7848	sense	371012	371111	99	29.151	6.99624	38	24	3.50215
chrXV	379619	379618	-	CUTs	CUT835	ST6740	sense	379590	379627	37	10.4944	6.12171	7	6	9.91134
chrXV	407923	407879	-	snoRNA_1000_nt_downstream	INT_0_7882	INT_0_7882	sense	407240	408064	824	1273.9	177.238	195	185	45.9725
chrXV	409923	409409	-	snoRNA_300_nt_upstream	YOR041C	YOR041C	sense	408652	409926	1274	556.201	15.1585	713	476	19.7448
chrXV	426394	426394	-	intergenic_region	INT_0_7902	INT_0_7902	sense	426374	426400	26	7.28775	2.33208	11	9	6.99624
chrXV	489880	489880	-	3UTR	INT_0_7951	INT_0_7951	sense	489880	489881	1	3.20661	3.20661	-1	1	3.20661
chrXV	502856	502856	-	antisense_CDS	INT_0_7960	INT_0_7960	sense	502854	502895	41	8.16228	2.04057	26	11	6.41447
chrXV	506749	506749	-	3UTR	YOR097C	YOR097C	sense	506743	506769	26	4.08114	2.33208	20	3	3.20661
chrXV	522368	522321	-	SUTs	XUT_15R-249	573051	sense	522080	522523	443	114.272	2.33208	258	142	14.9289
chrXV	552042	552040	-	3UTR	YOR121C	YOR121C	sense	552040	552042	2	15.1585	12.2434	-1	1	2.9151
chrXV	577704	577704	-	intergenic_region	INT_0_8015	INT_0_8015	sense	577704	577717	13	22.1548	7.87077	11	7	2.14519
chrXV	594489	594489	-	tRNA_100_nt_upstream	INT_0_8031	INT_0_8031	sense	594479	594522	43	9.32832	2.04057	32	10	8.7453
chrXV	609567	609567	-	3UTR	INT_0_8039	INT_0_8039	sense	609567	609571	4	3.20661	2.33208	3	2	2.33208
chrXV	611888	611888	-	intergenic_region	INT_0_8040	INT_0_8040	sense	611872	611896	24	10.4944	5.8302	7	4	10.2029
chrXV	618598	618598	-	5UTR	YOR152C	YOR152C	sense	618588	618646	58	19.5312	2.04057	16	15	5.18817
chrXV	626575	626573	-	3UTR	ISN1	YOR155C	sense	626573	626576	3	6.70473	3.49812	1	2	2.11588
chrXV	632468	632468	-	antisense_CDS	INT_0_8051	INT_0_8051	sense	632468	632497	29	8.16228	5.8302	14	4	7.21628
chrXV	638666	638666	-	3UTR	PNS1	YOR161C	sense	638552	638743	191	27.6935	2.62359	114	42	8.97262
chrXV	643125	643125	-	antisense_CDS	INT_0_8062	INT_0_8062	sense	643108	643137	29	7.57926	2.04057	20	9	3.03715
chrXV	648882	648882	-	CDS	RPS28A	YOR167C	sense	648882	648884	2	3.20661	2.33208	1	2	2.33208
chrXV	670446	670446	-	intergenic_region	INT_0_8084	INT_0_8084	sense	670324	670486	162	29.4425	3.49812	108	39	4.26769
chrXV	680569	680543	-	snoRNA_1000_nt_downstream	CUT853	ST6838	sense	680183	680685	502	233.791	28.8595	241	146	25.9447
chrXV	759302	759252	-	snoRNA_1000_nt_downstream	INT_0_8143	INT_0_8143	sense	758788	759426	638	1687.84	445.719	196	181	66.6907
chrXV	769546	769546	-	antisense_CDS	INT_0_8152	INT_0_8152	sense	769535	769630	95	11.9519	2.33208	63	18	11.6604
chrXV	783269	783269	-	antisense_CDS	INT_0_8164	INT_0_8164	sense	783267	783282	15	5.24718	2.04057	5	5	4.54358
chrXV	784540	784419	-	CUTs	CUT862	ST6874	sense	784003	784604	601	99.1134	2.33208	382	155	22.6511
chrXV	820339	820339	-	intergenic_region	INT_0_8195	INT_0_8195	sense	820292	820431	139	12.5349	3.20661	90	23	12.2434
chrXV	837603	837603	-	XUTs	XUT_15R-366	573064	sense	837577	837604	27	4.66416	2.04057	14	6	4.66416
chrXV	841935	841915	-	snoRNA_1000_nt_downstream	CAF20	YOR276W	antisense	841499	841982	483	1077.42	372.55	105	89	34.5301
chrXV	843575	843575	-	3UTR	INT_0_8212	INT_0_8212	sense	843572	843577	5	6.12171	2.62359	1	3	2.8636
chrXV	930554	930554	-	intergenic_region	INT_0_8277	INT_0_8277	sense	930554	930560	6	4.37265	2.62359	5	3	2.93997
chrXV	944252	944252	-	CUTs	CUT868	ST6931	sense	944032	944331	299	42.852	2.04057	142	62	42.5605
chrXV	953645	953612	-	CUTs	CUT869	ST6933	sense	953426	953894	468	76.6671	2.62359	241	107	19.4513
chrXV	978055	978055	-	CDS	TYE7	YOR344C	sense	977906	978131	225	24.4868	2.04057	150	40	24.1953
chrXV	1013138	1013135	-	3UTR	INT_0_8337	INT_0_8337	sense	1013135	1013138	3	6.12171	3.78963	2	3	2.33208
chrXV	1017726	1017729	-	3UTR	INT_0_8340	INT_0_8340	sense	1017722	1017732	10	9.03681	3.49812	3	5	2.49452
chrXV	1027933	1027946	-	SUTs	SUT800	ST6959	sense	1027886	1027985	99	50.1397	6.12171	78	47	3.58704
chrIX	22842	22842	-	3UTR	INT_0_2196	INT_0_2196	sense	22839	22843	4	3.49812	2.62359	0	2	3.49812
chrIX	89863	89862	-	3UTR	INT_0_2240	INT_0_2240	sense	89862	89863	1	8.7453	6.41322	0	2	2.33208
chrIX	127321	127321	-	XUTs	XUT_9R-53	572357	sense	127226	127338	112	25.3614	6.12171	54	25	12.7695
chrIX	127393	127393	-	XUTs	XUT_9R-53	572357	sense	127359	127513	154	34.1067	2.04057	113	45	11.7187
chrIX	172227	172217	-	3UTR	YIL102C-A	YIL102C-A	sense	172215	172247	32	7.87077	3.20661	9	4	3.15864
chrIX	177271	177271	-	5UTR	XBP1	YIL101C	sense	177185	177354	169	27.985	2.9151	89	40	12.6953
chrIX	179689	179689	-	3UTR	INT_0_2305	INT_0_2305	sense	179689	179712	23	5.53869	2.33208	7	4	3.43632
chrIX	185965	185954	-	CUTs	CUT662	ST5291	sense	185939	185981	42	12.2434	2.62359	35	9	6.08781
chrIX	186297	186296	-	3UTR	INT_0_2312	INT_0_2312	sense	186297	186306	9	6.41322	2.9151	8	6	2.37573
chrIX	186469	186466	-	3UTR	INT_0_2312	INT_0_2312	sense	186466	186469	3	9.61983	7.28775	2	2	2.33208
chrIX	200429	200429	-	3UTR	YIL086C	YIL086C	sense	200429	200433	4	5.53869	2.33208	3	5	2.89542
chrIX	231301	231301	-	intergenic_region	INT_0_2350	INT_0_2350	sense	231277	231331	54	10.7859	2.33208	48	15	3.24542
chrIX	231340	231339	-	3UTR	INT_0_2350	INT_0_2350	sense	231339	231340	1	54.8039	51.3058	-1	1	3.49812
chrIX	300073	300073	-	5UTR	SSM4	YIL030C	sense	300060	300084	24	3.20661	2.04057	14	3	2.9151
chrIX	349800	349803	-	CUTs	CUT667	ST5349	sense	349668	349936	268	42.269	2.04057	108	54	23.8872
chrIX	372695	372695	-	3UTR	INT_0_2466	INT_0_2466	sense	372684	372749	65	5.53869	2.9151	48	7	5.24718
chrIX	381989	381989	-	CUTs	CUT669	ST5357	sense	381528	382066	538	62.6747	2.04057	331	113	31.7754
chrIX	420934	420934	-	3UTR	INT_0_2511	INT_0_2511	sense	420932	420935	3	4.37265	2.33208	1	3	3.4745
chrIX	421998	421998	-	3UTR	INT_0_2513	INT_0_2513	sense	421998	421999	1	2.04057	2.04057	-1	1	2.04057
chrXI	24126	24136	-	SUTs	XUT_11R-12	572526	sense	24096	24222	126	17.4906	2.62359	83	22	7.16768
chrXI	64022	64022	-	CDS	MNN4	YKL201C	sense	64022	64028	6	2.62359	2.33208	-1	1	2.33208
chrXI	96002	95985	-	CUTs	CUT703	ST5643	sense	95967	96150	183	34.3982	2.62359	119	52	19.5441
chrXI	143524	143524	-	intergenic_region	INT_0_5107	INT_0_5107	sense	143460	143596	136	16.0331	2.9151	108	22	4.00904
chrXI	164380	164354	-	3UTR	GPM1	YKL152C	sense	164176	164493	317	108.15	8.45379	119	80	22.4749
chrXI	165922	165898	-	CDS	YKL151C	YKL151C	sense	165781	165932	151	39.9369	4.37265	82	43	3.7028
chrXI	245807	245808	-	intergenic_region	INT_0_5187	INT_0_5187	sense	245769	245844	75	29.734	6.99624	12	11	29.4425
chrXI	269622	269618	-	3UTR	INT_0_5207	INT_0_5207	sense	269616	269622	6	9.91134	4.95567	3	4	3.24542
chrXI	281285	281285	-	CDS	RRP14	YKL082C	sense	281285	281299	14	2.33208	2.04057	-1	1	2.04057
chrXI	281780	281765	-	CDS	RRP14	YKL082C	sense	281765	281781	16	6.41322	2.9151	14	5	2.22725
chrXI	286073	286073	-	CUTs	CUT711	ST5707	sense	285580	286088	508	48.3907	2.04057	377	102	15.7498
chrXI	286184	286184	-	CUTs	CUT711	ST5707	sense	286109	286206	97	17.1991	3.20661	62	22	5.5363
chrXI	316152	316154	-	antisense_CDS	INT_0_5247	INT_0_5247	sense	316121	316174	53	21.5717	8.45379	14	10	3.90214
chrXI	334191	334190	-	intergenic_region	INT_0_5264	INT_0_5264	sense	334190	334191	1	4.95567	2.62359	0	2	2.33208
chrXI	345964	345963	-	3UTR	YKL050C	YKL050C	sense	345963	345964	1	18.6566	16.3246	-1	1	2.33208
chrXI	360015	360015	-	intergenic_region	INT_0_5282	INT_0_5282	sense	359961	360020	59	6.41322	2.04057	25	8	6.12171
chrXI	417297	417231	-	intergenic_region	INT_0_5322	INT_0_5322	sense	417231	417299	68	37.6048	9.32832	44	19	2.00452
chrXI	431033	430815	-	snoRNA	SNR87	snR87	sense	430355	431142	787	673.097	34.6897	451	351	33.5249
chrXI	431221	431220	-	snoRNA_300_nt_upstream	INT_0_5333	INT_0_5333	sense	431164	431245	81	384.793	220.382	6	8	53.4134
chrXI	513467	513469	-	tRNA_100_nt_upstream	INT_0_5392	INT_0_5392	sense	513443	513550	107	19.2397	3.49812	82	22	2.82689
chrXI	514057	514056	-	SUTs	XUT_11R-223	572559	sense	514036	514179	143	64.1322	19.8227	79	20	7.13805
chrXI	537309	537309	-	CDS	YSR3	YKR053C	sense	537309	537310	1	2.04057	2.04057	-1	1	2.04057
chrXI	556654	556886	-	CUTs	INT_0_5422	INT_0_5422	sense	556654	557174	520	242.828	13.118	421	239	13.898
chrXI	558991	558922	-	snoRNA_1000_nt_downstream	INT_0_5426	INT_0_5426	sense	558475	559271	796	1197.23	76.3756	221	207	39.1932
chrXI	565148	565115	-	3UTR	INT_0_5432	INT_0_5432	sense	565088	565157	69	25.6529	4.95567	42	24	2.19363
chrXI	579682	579674	-	3UTR	INT_0_5442	INT_0_5442	sense	579673	579703	30	12.2434	2.9151	11	6	2.0602
chrXI	608775	608781	-	intergenic_region	INT_0_5470	INT_0_5470	sense	608752	608809	57	22.4463	8.45379	21	8	6.77083
chrXI	614113	614113	-	CUTs	CUT729	ST5827	sense	613994	614224	230	26.8189	3.78963	149	43	4.14729
chrXI	617796	617796	-	intergenic_region	INT_0_5475	INT_0_5475	sense	617795	617797	2	3.78963	2.33208	1	3	3.4745
chrVI	27157	27158	-	XUTs	XUT_6R-17	572052	sense	27152	27163	11	10.7859	4.37265	2	3	10.2029
chrVI	38708	38708	-	3UTR	INT_0_3021	INT_0_3021	sense	38708	38721	13	5.53869	2.9151	9	5	2.00452
chrVI	52973	52971	-	3UTR	INT_0_3028	INT_0_3028	sense	52971	52973	2	11.3689	9.32832	-1	1	2.04057
chrVI	74504	74504	-	5UTR	INT_0_3041	INT_0_3041	antisense	74504	74563	59	14.284	2.62359	30	17	2.91567
chrVI	114945	114944	-	3UTR	INT_0_3080	INT_0_3080	sense	114944	114945	1	54.2209	52.1803	-1	1	2.04057
chrVI	137622	137622	-	tRNA_100_nt_upstream	INT_0_3095	INT_0_3095	sense	137616	137669	53	8.45379	4.08114	29	7	8.16228
chrVI	148654	148648	-	intergenic_region	INT_0_3097	INT_0_3097	sense	148598	148673	75	13.9925	2.62359	26	11	13.701
chrVI	210772	210772	-	tRNA_100_nt_upstream	INT_0_3143	INT_0_3143	sense	210764	210783	19	8.7453	2.62359	10	7	7.87077
chrVI	216542	216536	-	3UTR	INT_0_3145	INT_0_3145	sense	216537	216542	5	23.9038	17.4906	0	2	3.26663
chrVI	224574	224576	-	CDS	QCR6	YFR033C	sense	224534	224625	91	34.3982	9.32832	47	13	2.27379
chrVI	239058	239053	-	3UTR	INT_0_3162	INT_0_3162	sense	239053	239059	6	10.4944	6.99624	4	5	2.59845
chrVI	251971	251969	-	CUTs	CUT580	ST4736	sense	251906	251973	67	22.1548	5.24718	15	13	18.9482
chrXVI	44462	44462	-	3UTR	KEL3	YPL263C	sense	44462	44468	6	2.9151	2.62359	-1	1	2.62359
chrXVI	56007	56007	-	5UTR	THI21	YPL258C	sense	55925	56105	180	24.1953	2.33208	111	37	15.6544
chrXVI	56336	56336	-	tRNA_100_nt_upstream	INT_0_8436	INT_0_8436	sense	56306	56386	80	25.6529	8.7453	15	10	25.3614
chrXVI	90458	90401	-	3UTR	INT_0_8460	INT_0_8460	sense	90401	90458	57	15.45	9.91134	43	9	5.53869
chrXVI	105642	105654	-	CUTs	CUT879	ST6996	sense	105594	105837	243	75.7926	7.87077	146	77	18.1462
chrXVI	131487	131487	-	CUTs	CUT882	ST7005	sense	131297	131996	699	81.3313	2.04057	467	146	33.7732
chrXVI	163808	163801	-	CUTs	CUT886	ST7017	sense	163738	163839	101	36.7303	4.66416	38	23	5.22011
chrXVI	190997	190975	-	CUTs	CUT888	ST7026	sense	190796	191036	240	58.0105	5.53869	113	60	13.2298
chrXVI	192422	192422	-	antisense_CDS	INT_0_8542	INT_0_8542	sense	192312	192622	310	28.8595	2.33208	216	57	11.9056
chrXVI	195748	195748	-	3UTR	MRN1	YPL184C	sense	195740	195762	22	7.87077	2.9151	17	6	3.62723
chrXVI	204499	204499	-	CUTs	CUT890	ST7031	sense	204491	204500	9	3.49812	2.04057	3	4	3.49812
chrXVI	246389	246389	-	intergenic_region	INT_0_8582	INT_0_8582	sense	246384	246416	32	5.24718	2.62359	5	5	4.95567
chrXVI	281054	281057	-	snoRNA_1000_nt_downstream	INT_0_8602	INT_0_8602	sense	281000	281192	192	307.543	72.8775	16	17	14.9842
chrXVI	289529	289529	-	3UTR	UME1	YPL139C	sense	289525	289551	26	4.66416	2.04057	18	5	2.8636
chrXVI	337369	337366	-	3UTR	INT_0_8643	INT_0_8643	sense	337365	337369	4	38.1878	30.9001	-1	1	2.78406
chrXVI	369775	369774	-	3UTR	INT_0_8671	INT_0_8671	sense	369774	369775	1	41.3944	39.0623	-1	1	2.33208
chrXVI	419876	419876	-	antisense_CDS	INT_0_8703	INT_0_8703	sense	419874	419885	11	4.66416	2.33208	8	3	3.11815
chrXVI	428655	428655	-	3UTR	CWC27	YPL064C	sense	428655	428668	13	4.95567	2.62359	4	3	2.6727
chrXVI	434134	434134	-	intergenic_region	INT_0_8715	INT_0_8715	sense	434132	434139	7	5.24718	3.20661	0	2	3.05451
chrXVI	444236	444236	-	SUTs	XUT_16R-184	573180	sense	444235	444237	2	3.78963	2.33208	0	2	2.62359
chrXVI	444433	444433	-	CUTs	CUT899	ST7104	sense	444426	444456	30	4.66416	2.33208	1	2	4.37265
chrXVI	445611	445606	-	intergenic_region	INT_0_8726	INT_0_8726	sense	445605	445612	7	7.87077	4.08114	4	3	2.22725
chrXVI	493021	493021	-	CDS	YPL031C_intron	intergenic	sense	492920	493058	138	8.16228	2.62359	104	14	7.87077
chrXVI	574035	574035	-	antisense_CDS	INT_0_8826	INT_0_8826	sense	573979	574093	114	14.867	4.95567	29	11	5.1398
chrXVI	608514	608514	-	3UTR	INT_0_8852	INT_0_8852	sense	608501	608523	22	9.03681	3.20661	8	7	3.34087
chrXVI	622694	622696	-	tRNA_100_nt_upstream	INT_0_8863	INT_0_8863	sense	622684	622720	36	17.1991	4.95567	6	7	16.9076
chrXVI	639162	639160	-	CUTs	CUT906	ST7170	sense	639043	639184	141	29.151	4.95567	98	33	26.4597
chrXVI	696992	696992	-	intergenic_region	INT_0_8928	INT_0_8928	sense	696848	697041	193	43.435	9.91134	122	48	10.4094
chrXVI	718702	718632	-	snoRNA	ASR1	YPR093C	sense	718317	718716	399	762.59	219.799	157	134	17.6492
chrXVI	718885	718881	-	snoRNA_1000_nt_downstream	ASR1	YPR093C	sense	718821	718899	78	482.158	234.083	12	14	21.0379
chrXVI	719112	719106	-	snoRNA_1000_nt_downstream	ASR1	YPR093C	sense	719075	719134	59	709.244	170.533	18	20	87.8378
chrXVI	719290	719289	-	snoRNA_300_nt_upstream	ASR1	YPR093C	sense	719265	719303	38	63.8407	34.1067	10	11	20.8088
chrXVI	728871	728804	-	3UTR	INT_0_8954	INT_0_8954	sense	728804	728871	67	16.0331	6.70473	57	14	2.37573
chrXVI	741494	741494	-	CDS	YTH1	YPR107C	sense	741494	741504	10	4.08114	2.62359	0	2	3.49812
chrXVI	804509	804448	-	intergenic_region	INT_0_9015	INT_0_9015	sense	804415	804509	94	37.6048	11.3689	55	19	2.8636
chrXVI	819642	819639	-	intergenic_region	INT_0_9025	INT_0_9025	sense	819636	819667	31	10.7859	3.78963	13	6	3.43632
chrXVI	828342	828342	-	intergenic_region	INT_0_9034	INT_0_9034	sense	828307	828350	43	5.53869	2.33208	24	9	5.24718
chrXVI	838932	838932	-	CDS	TPO3	YPR156C	sense	838930	838955	25	3.78963	2.04057	22	5	3.20661
chrXVI	839830	839830	-	5UTR	TPO3	YPR156C	sense	839708	839860	152	17.4906	4.37265	80	22	8.7605
chrXVI	878019	878019	-	CUTs	SUT844	ST7250	sense	877869	878380	511	64.1322	2.04057	315	114	63.8407
chrXVI	882918	882918	-	3UTR	YPR170C	YPR170C	sense	882907	882928	21	18.9482	5.8302	7	8	18.6566
chrXVI	900053	900053	-	intergenic_region	INT_0_9089	INT_0_9089	sense	900035	900057	22	19.8227	4.95567	6	8	17.4906
chrX	79599	79599	-	5UTR	SWE1	YJL187C	sense	79571	79692	121	28.568	8.7453	34	16	28.2765
chrX	83341	83341	-	intergenic_region	INT_0_4513	INT_0_4513	sense	83298	83381	83	25.0699	11.3689	19	11	11.359
chrX	116075	116075	-	tRNA_100_nt_upstream	INT_0_4545	INT_0_4545	sense	116065	116118	53	24.7784	15.7415	13	8	18.7089
chrX	116601	116601	-	XUTs	XUT_10R-39	572425	sense	116599	116604	5	3.78963	2.04057	1	2	3.20661
chrX	117541	117541	-	SUTs	XUT_10R-39	572425	sense	117536	117546	10	4.66416	2.9151	0	2	4.37265
chrX	118783	118799	-	CDS	YJL160C	YJL160C	sense	118701	118858	157	45.1841	2.33208	82	49	44.8925
chrX	121927	121925	-	intergenic_region	INT_0_4551	INT_0_4551	sense	121923	121973	50	32.0661	11.6604	44	19	2.12119
chrX	136204	136204	-	5UTR	INO1	YJL153C	sense	136174	136296	122	25.0699	2.9151	105	36	2.54542
chrX	139541	139463	-	snoRNA_1000_nt_downstream	INT_0_4567	INT_0_4567	sense	139028	139602	574	4438.82	867.825	239	225	88.4662
chrX	139758	139755	-	snoRNA_1000_nt_downstream	INT_0_4569	INT_0_4569	sense	139752	139809	57	166.452	66.7558	1	3	2.15784
chrX	139868	139854	-	snoRNA	SNR190	snR190	sense	139836	139954	118	18.6566	2.33208	73	29	8.41899
chrX	139992	139993	-	snoRNA_300_nt_upstream	CUT677	ST5426	sense	139975	140052	77	132.054	56.2614	21	16	24.1077
chrX	144437	144437	-	SUTs	XUT_10R-52	572427	sense	144437	144452	15	3.49812	2.04057	14	3	2.33208
chrX	172824	172810	-	5UTR	XUT_10F-82	572396	antisense	172599	172922	323	343.69	30.317	160	129	74.9628
chrX	180682	180668	-	intergenic_region	INT_0_4602	INT_0_4602	sense	180575	180770	195	38.7708	3.20661	94	53	12.5999
chrX	191130	191130	-	3UTR	RPE1	YJL121C	sense	191003	191171	168	26.2359	2.04057	84	36	23.5197
chrX	195051	194999	-	5UTR	NCA3	YJL116C	sense	194897	195075	178	56.8445	11.0774	85	52	3.98848
chrX	220502	220502	-	intergenic_region	INT_0_4631	INT_0_4631	sense	220485	220530	45	5.24718	2.04057	33	6	4.66416
chrX	227948	227929	-	snoRNA_1000_nt_downstream	CUT681	ST5458	sense	227515	228110	595	2453.06	90.9511	182	178	57.0763
chrX	228156	228156	-	snoRNA	SNR37	snR37	sense	228132	228221	89	10.2029	2.33208	47	13	9.08717
chrX	254584	254584	-	intergenic_region	INT_0_4651	INT_0_4651	sense	254584	254600	16	6.70473	2.62359	15	4	4.08114
chrX	294096	294096	-	CUTs	PRY3	YJL078C	sense	294096	294097	1	2.62359	2.33208	-1	1	2.33208
chrX	349106	348918	-	snoRNA_1000_nt_downstream	YJL047C-A	YJL047C-A	sense	348528	349189	661	887.356	53.3463	454	379	59.8016
chrX	349304	349302	-	snoRNA_300_nt_upstream	YJL047C-A	YJL047C-A	sense	349246	349309	63	16.0331	4.95567	14	8	15.7415
chrX	397274	397253	-	3UTR	PET130	YJL023C	sense	397253	397282	29	11.9519	4.37265	20	6	2.05592
chrX	414018	414002	-	3UTR	CUT690	ST5511	sense	413973	414019	46	6.12171	2.33208	26	3	3.62723
chrX	419790	419790	-	3UTR	INT_0_4777	INT_0_4777	sense	419789	419793	4	6.70473	2.62359	1	3	2.6727
chrX	424579	424579	-	tRNA_100_nt_upstream	INT_0_4783	INT_0_4783	sense	424573	424594	21	11.3689	6.41322	12	9	10.7859
chrX	434830	434830	-	SUTs	SUT636	ST5519	sense	434809	434838	29	38.1878	10.2029	5	7	37.8963
chrX	436441	436441	-	intergenic_region	INT_0_4789	INT_0_4789	sense	436434	436444	10	5.24718	2.33208	4	4	3.78963
chrX	548374	548374	-	intergenic_region	INT_0_4873	INT_0_4873	sense	548374	548394	20	3.78963	3.49812	-1	1	2.6727
chrX	651092	651092	-	CUTs	CUT699	ST5593	sense	651060	651141	81	6.99624	2.62359	54	9	6.70473
chrX	703072	703072	-	5UTR	RPS4A	YJR145C	sense	703054	703073	19	5.8302	2.9151	9	4	5.8302
chrVII	35252	35252	-	CUTs	CUT584	ST4748	sense	35011	35254	243	20.9887	2.9151	160	36	20.6972
chrVII	55967	55944	-	5UTR	CUT585	ST4753	sense	55621	56101	480	239.33	6.70473	200	155	37.7864
chrVII	72327	72318	-	antisense_CDS	INT_0_3239	INT_0_3239	sense	72295	72479	184	66.4643	15.7415	98	40	2.21424
chrVII	73964	73965	-	tRNA_100_nt_upstream	INT_0_3244	INT_0_3244	sense	73951	74005	54	130.596	24.4868	11	12	119.202
chrVII	89932	89930	-	3UTR	INT_0_3258	INT_0_3258	antisense	89930	89932	2	19.2397	15.1585	0	2	3.11815
chrVII	94417	94447	-	CUTs	CUT586	ST4765	sense	94222	94601	379	235.832	9.61983	134	120	32.7203
chrVII	110525	110525	-	tRNA_100_nt_downstream	INT_0_3272	INT_0_3272	sense	110501	110542	41	7.28775	2.04057	24	11	4.58176
chrVII	144261	144261	-	intergenic_region	INT_0_3291	INT_0_3291	sense	144250	144306	56	20.4057	11.0774	7	8	20.1142
chrVII	145347	145347	-	3UTR	INT_0_3291	INT_0_3291	sense	145322	145359	37	7.87077	5.8302	0	2	4.96358
chrVII	191857	191857	-	3UTR	YGL165C	YGL165C	sense	191854	191881	27	4.95567	2.33208	25	7	2.22725
chrVII	210051	210051	-	CUTs	CUT591	ST4798	sense	209937	210052	115	13.701	2.04057	93	19	13.701
chrVII	220898	220897	-	3UTR	INT_0_3347	INT_0_3347	sense	220898	220900	2	4.37265	3.49812	1	2	3.49812
chrVII	276854	276854	-	CUTs	CUT593	ST4816	sense	276732	276942	210	20.4057	2.33208	112	37	20.1142
chrVII	278740	278740	-	3UTR	NAB2	YGL122C	sense	278737	278741	4	3.49812	3.20661	-1	1	3.49812
chrVII	280603	280599	-	3UTR	INT_0_3388	INT_0_3388	sense	280599	280612	13	6.99624	2.62359	3	4	2.09998
chrVII	314224	314224	-	CUTs	CUT595	ST4826	sense	314110	314277	167	33.2321	3.49812	62	38	12.5839
chrVII	319038	319032	-	intergenic_region	INT_0_3416	INT_0_3416	sense	319023	319068	45	14.5755	3.20661	21	7	2.42522
chrVII	328830	328834	-	3UTR	VPS45	YGL095C	sense	328830	328836	6	5.8302	2.33208	3	4	3.17383
chrVII	343098	343098	-	5UTR	NBP35	YGL091C	sense	343098	343118	20	6.99624	2.33208	17	7	3.81814
chrVII	346886	346886	-	intron	YGL087C_intron	intergenic	sense	346883	346899	16	4.66416	2.62359	12	3	3.78963
chrVII	365001	364997	-	snoRNA_1000_nt_downstream	YGL076C_intron	intergenic	sense	364946	365066	120	439.306	78.7077	54	56	43.7509
chrVII	365141	365140	-	snoRNA_1000_nt_downstream	YGL076C_intron	intergenic	sense	365101	365166	65	285.388	195.895	6	8	163.369
chrVII	366262	366295	-	snoRNA_1000_nt_downstream	INT_0_3455	INT_0_3455	sense	366132	366428	296	528.799	106.401	116	100	40.38
chrVII	366570	366564	-	snoRNA_300_nt_upstream	INT_0_3456	INT_0_3456	sense	366518	366622	104	106.11	55.3869	36	25	13.7835
chrVII	381420	381420	-	intergenic_region	INT_0_3468	INT_0_3468	sense	381420	381449	29	5.53869	2.62359	17	6	2.6727
chrVII	415867	415868	-	3UTR	INT_0_3497	INT_0_3497	sense	415867	415884	17	7.87077	4.08114	0	2	2.38634
chrVII	437411	437410	-	3UTR	RPL24A	YGL031C	sense	437410	437411	1	23.3208	20.6972	-1	1	2.62359
chrVII	439660	439661	-	intergenic_region	INT_0_3523	INT_0_3523	sense	439622	439696	74	10.2029	3.20661	15	7	9.91134
chrVII	515923	515935	-	CUTs	CUT603	ST4888	sense	515790	516060	270	69.0879	2.33208	168	87	52.563
chrVII	533961	533952	-	intergenic_region	INT_0_3592	INT_0_3592	sense	533881	533961	80	15.7415	2.62359	47	21	2.73344
chrVII	535029	535029	-	CUTs	XUT_7R-243	572183	sense	534908	535194	286	60.3426	6.41322	83	45	5.61812
chrVII	544371	544369	-	SUTs	XUT_7R-245	572184	sense	544356	544372	16	10.2029	3.78963	9	6	4.13053
chrVII	544715	544713	-	tRNA_100_nt_upstream	INT_0_3601	INT_0_3601	sense	544694	544752	58	63.2577	14.284	10	10	62.9662
chrVII	559327	559326	-	intergenic_region	INT_0_3613	INT_0_3613	sense	559268	559491	223	180.736	39.3539	103	43	2.17023
chrVII	574691	574691	-	intergenic_region	INT_0_3619	INT_0_3619	sense	574657	574785	128	20.9887	2.04057	72	26	9.48807
chrVII	577040	577040	-	XUTs	XUT_7R-264	572188	sense	577040	577043	3	2.9151	2.62359	-1	1	2.62359
chrVII	591997	592013	-	3UTR	YGR050C	YGR050C	sense	591997	592017	20	6.99624	2.62359	15	4	2.79418
chrVII	608728	608728	-	CUTs	CUT609	ST4914	sense	608566	608816	250	39.0623	2.04057	173	69	38.7708
chrVII	643000	642997	-	3UTR	INT_0_3675	INT_0_3675	sense	642993	643006	13	10.7859	3.20661	8	6	3.22951
chrVII	646986	646986	-	intergenic_region	INT_0_3680	INT_0_3680	sense	646965	647011	46	5.8302	2.33208	25	7	4.27631
chrVII	652984	652984	-	5UTR	PDC6	YGR087C	sense	652984	653007	23	3.49812	2.62359	2	2	3.20661
chrVII	656373	656276	-	CUTs	CUT610	ST4934	sense	656152	656386	234	90.6596	7.28775	138	77	5.83476
chrVII	700958	700957	-	tRNA	tK(UUU)G2	tK(UUU)G2	sense	700957	700994	37	13.4095	3.49812	10	9	13.118
chrVII	732876	732921	-	CDS	MEP1	YGR121C	sense	732743	733044	301	60.6341	2.62359	149	82	21.2788
chrVII	739327	739326	-	CUTs	CUT617	ST4959	sense	739208	739360	152	32.0661	10.4944	65	23	31.7746
chrVII	761789	761789	-	CUTs	CUT620	ST4967	sense	761581	761949	368	78.1247	2.04057	240	121	29.511
chrVII	781377	781376	-	SUTs	INT_0_3786	INT_0_3786	sense	781377	781390	13	7.87077	3.49812	7	3	2.5699
chrVII	795530	795530	-	5UTR	INT_0_3802	INT_0_3802	antisense	795530	795533	3	2.9151	2.62359	-1	1	2.62359
chrVII	801614	801613	-	SUTs	XUT_7R-365	572206	sense	801453	801746	293	53.0548	2.33208	159	81	4.24349
chrVII	810635	810633	-	XUTs	XUT_7R-374	572207	sense	810633	810644	11	8.16228	2.62359	2	4	2.17157
chrVII	857554	857554	-	tRNA_100_nt_upstream	INT_0_3853	INT_0_3853	sense	857541	857569	28	9.32832	3.20661	10	9	9.03681
chrVII	879160	879160	-	3UTR	YGR190C	YGR190C	sense	878986	879299	313	53.3463	2.33208	170	76	30.4019
chrVII	882571	882571	-	5UTR	YGR190C	YGR190C	sense	882571	882625	54	6.12171	2.9151	20	6	5.8302
chrVII	939469	939458	-	snRNA	SNR7-L	snR7-L	sense	939397	939557	160	119.811	21.8633	95	55	11.6575
chrVII	952320	952319	-	3UTR	INT_0_3926	INT_0_3926	sense	952319	952320	1	20.4057	18.3651	-1	1	2.04057
chrVII	958737	958759	-	intergenic_region	INT_0_3930	INT_0_3930	sense	958472	958803	331	63.8407	2.9151	189	84	9.39754
chrVII	974006	974006	-	CUTs	CUT630	ST5041	sense	973909	974066	157	18.0736	2.04057	109	33	11.6453
chrVII	998310	998310	-	3UTR	INT_0_3956	INT_0_3956	sense	998310	998320	10	2.62359	2.04057	8	2	2.33208
chrVII	1048220	1048220	-	antisense_CDS	INT_0_3989	INT_0_3989	sense	1048220	1048221	1	2.62359	2.62359	-1	1	2.62359
chrVII	1057443	1057438	-	intergenic_region	INT_0_3993	INT_0_3993	sense	1057438	1057443	5	17.1991	11.9519	3	3	3.43632
chrVII	1058909	1058908	-	3UTR	INT_0_3996	INT_0_3996	sense	1058908	1058909	1	5.53869	2.9151	0	2	2.62359
chrVII	1081790	1081790	-	CDS	COS6	YGR295C	sense	1081790	1081791	1	6.70473	6.70473	-1	1	5.12267
chrIII	39647	39646	-	3UTR	INT_0_831	INT_0_831	sense	39645	39662	17	39.9369	22.7378	13	10	2.06527
chrIII	82535	82535	-	tRNA_100_nt_upstream	tE(UUC)C	tE(UUC)C	sense	82535	82546	11	5.24718	2.04057	6	6	4.95567
chrIII	82595	82596	-	tRNA_100_nt_upstream	INT_0_867	INT_0_867	sense	82568	82670	102	26.2359	4.08114	39	22	25.6529
chrIII	107479	107413	-	snoRNA_1000_nt_downstream	INT_0_883	INT_0_883	sense	107095	107519	424	861.412	149.253	146	139	14.3974
chrIII	120826	120822	-	3UTR	CIT2	YCR005C	sense	120822	120828	6	5.8302	2.62359	3	2	2.06527
chrIII	123483	123482	-	tRNA_100_nt_downstream	INT_0_904	INT_0_904	sense	123254	123574	320	2035.32	420.649	6	8	114.827
chrIII	124578	124578	-	XUTs	XUT_3R-54	571727	sense	124462	124802	340	63.2577	2.33208	233	90	36.0814
chrIII	141131	141131	-	3UTR	INT_0_920	INT_0_920	sense	141131	141135	4	5.53869	2.62359	3	4	2.6727
chrIII	142259	142208	-	snoRNA_1000_nt_downstream	YCR015C	YCR015C	sense	141933	142372	439	1856.34	155.083	125	126	8.23672
chrIII	147747	147728	-	intergenic_region	INT_0_924	INT_0_924	sense	147728	147922	194	51.0143	5.53869	133	48	3.81188
chrIII	153934	153935	-	3UTR	INT_0_931	INT_0_931	sense	153899	153947	48	25.3614	6.12171	16	10	4.25652
chrIII	168906	168910	-	intergenic_region	INT_0_949	INT_0_949	sense	168889	168929	40	32.6491	8.7453	19	14	2.69699
chrIII	169736	169735	-	intergenic_region	INT_0_949	INT_0_949	sense	169727	169764	37	8.45379	2.62359	6	6	4.00904
chrIII	178584	178550	-	snoRNA_1000_nt_downstream	INT_0_959	INT_0_959	sense	178198	178612	414	730.233	114.563	114	86	55.7703
chrIII	204478	204475	-	CDS	TAF2	YCR042C	sense	204475	204478	3	9.32832	4.66416	2	3	4.27631
chrIII	218247	218247	-	3UTR	CTR86	YCR054C	sense	218244	218277	33	4.66416	2.04057	9	3	4.37265
chrIII	228083	228081	-	3UTR	INT_0_996	INT_0_996	sense	228019	228113	94	24.1953	2.9151	36	21	23.9038
chrIII	242515	242507	-	3UTR	INT_0_1007	INT_0_1007	sense	242507	242524	17	30.6086	11.3689	13	11	2.30405
chrIII	258781	258781	-	intergenic_region	INT_0_1018	INT_0_1018	sense	258765	258785	20	6.12171	2.9151	3	4	5.8302
chrIII	298579	298584	-	CDS	GIT1	YCR098C	sense	298502	298680	178	29.151	3.78963	104	38	9.44989
chrIII	310674	310674	-	intergenic_region	INT_0_1050	INT_0_1050	sense	310624	310675	51	8.16228	2.9151	26	9	7.87077
chrIII	310722	310722	-	intergenic_region	INT_0_1050	INT_0_1050	sense	310700	310723	23	4.08114	2.04057	0	2	4.08114
chrIV	18689	18689	-	5UTR	AAD4	YDL243C	sense	18683	18701	18	3.78963	2.62359	11	2	3.20661
chrIV	125587	125589	-	CDS	YDL187C	YDL187C	sense	125577	125608	31	7.57926	2.9151	8	5	6.68174
chrIV	130150	130031	-	intergenic_region	INT_0_1143	INT_0_1143	sense	129923	130166	243	58.885	8.16228	140	53	2.1827
chrIV	144265	144255	-	3UTR	AIR2	YDL175C	sense	144206	144293	87	25.0699	8.16228	12	9	2.77048
chrIV	149125	149133	-	intergenic_region	INT_0_1161	INT_0_1161	sense	149087	149137	50	16.0331	2.62359	44	13	2.6232
chrIV	173851	173851	-	3UTR	INT_0_1181	INT_0_1181	sense	173806	173859	53	9.32832	2.33208	23	12	4.15753
chrIV	215384	215465	-	CUTs	XUT_4R-81	571871	sense	215300	215667	367	89.7851	5.24718	254	126	13.2342
chrIV	221888	221875	-	intergenic_region	INT_0_1212	INT_0_1212	sense	221875	221917	42	17.7821	6.41322	20	13	4.84426
chrIV	235935	235934	-	intergenic_region	INT_0_1220	INT_0_1220	sense	235932	235949	17	3.49812	2.33208	1	2	3.20661
chrIV	247721	247723	-	5UTR	YDL119C	YDL119C	sense	247588	247849	261	122.434	7.87077	117	80	111.986
chrIV	263246	263246	-	3UTR	INT_0_1240	INT_0_1240	sense	263246	263248	2	6.41322	3.20661	0	2	3.43632
chrIV	282011	282011	-	3UTR	INT_0_1254	INT_0_1254	sense	282011	282016	5	4.66416	2.33208	0	2	2.07876
chrIV	292335	292335	-	CUTs	CUT482	ST4093	sense	292321	292337	16	5.53869	3.78963	6	4	5.24718
chrIV	323215	323066	-	snoRNA_1000_nt_downstream	INT_0_1289	INT_0_1289	sense	322881	323243	362	1009.5	67.0473	215	198	20.6478
chrIV	323568	323562	-	snoRNA_300_nt_upstream	INT_0_1291	INT_0_1291	sense	323517	323584	67	164.703	48.0992	20	21	39.6684
chrIV	365881	365868	-	5UTR	KNH1	YDL049C	sense	365746	365967	221	51.3058	3.20661	108	51	5.84652
chrIV	366647	366647	-	3UTR	INT_0_1325	INT_0_1325	sense	366635	366649	14	11.0774	2.33208	7	8	2.51548
chrIV	414966	414955	-	3UTR	INT_0_1367	INT_0_1367	sense	414952	414966	14	32.6491	13.701	10	9	2.22725
chrIV	428480	428480	-	CUTs	CUT492	ST4150	sense	428409	428544	135	17.4906	2.9151	101	33	17.1991
chrIV	442494	442495	-	intergenic_region	INT_0_1392	INT_0_1392	sense	442488	442525	37	8.16228	2.33208	13	7	7.87077
chrIV	443906	443831	-	SUTs	XUT_4R-190	571883	sense	443544	444017	473	83.3719	3.78963	319	120	29.2969
chrIV	446613	446613	-	3UTR	INT_0_1395	INT_0_1395	sense	446608	446614	6	3.78963	2.33208	4	2	3.4745
chrIV	458410	458410	-	3UTR	INT_0_1404	INT_0_1404	sense	458410	458429	19	6.41322	2.9151	9	6	2.22725
chrIV	488937	488935	-	tRNA_100_nt_upstream	XUT_4R-212	571887	sense	488925	488982	57	32.9406	9.61983	8	7	24.9452
chrIV	524903	524905	-	intergenic_region	INT_0_1452	INT_0_1452	sense	524882	524966	84	32.6491	5.24718	13	13	32.3576
chrIV	527288	527288	-	3UTR	KRS1	YDR037W	antisense	527288	527305	17	7.57926	2.33208	16	7	3.17383
chrIV	540508	540500	-	3UTR	INT_0_1457	INT_0_1457	sense	540482	540537	55	41.9774	11.6604	19	16	8.68626
chrIV	541577	541402	-	snoRNA_1000_nt_downstream	YDR042C	YDR042C	sense	540946	541674	728	1294.01	50.7227	336	296	45.6209
chrIV	541775	541775	-	snoRNA_300_nt_upstream	INT_0_1460	INT_0_1460	sense	541730	541787	57	19.2397	2.04057	40	22	18.9482
chrIV	556539	556539	-	CUTs	CUT497	ST4187	sense	556506	556542	36	12.2434	6.41322	8	6	11.9519
chrIV	562481	562481	-	5UTR	CDC34	YDR054C	sense	562406	562689	283	30.0255	2.33208	175	52	29.734
chrIV	598407	598407	-	intergenic_region	INT_0_1511	INT_0_1511	sense	598391	598429	38	8.7453	2.33208	34	10	7.28775
chrIV	602653	602653	-	CDS	SHU2	YDR078C	sense	602653	602664	11	4.37265	2.04057	6	4	4.08114
chrIV	616714	616711	-	3UTR	INT_0_1526	INT_0_1526	sense	616711	616714	3	51.0143	45.4756	-1	1	2.30824
chrIV	643938	643938	-	intergenic_region	INT_0_1543	INT_0_1543	sense	643929	643954	25	15.1585	6.70473	14	7	3.24542
chrIV	645190	645190	-	tRNA	tQ(UUG)D2	tQ(UUG)D2	sense	645180	645192	12	4.08114	2.33208	5	4	3.78963
chrIV	655564	655556	-	3UTR	INT_0_1548	INT_0_1548	sense	655554	655564	10	22.1548	13.4095	6	7	2.22725
chrIV	665315	665315	-	3UTR	TMS1	YDR105C	sense	665289	665320	31	5.8302	2.04057	8	5	2.8636
chrIV	678089	678089	-	3UTR	ALT2	YDR111C	sense	678089	678104	15	4.37265	3.20661	12	3	3.74177
chrIV	703886	703921	-	CUTs	XUT_4R-303	571901	sense	703707	704116	409	220.09	4.66416	223	161	25.8361
chrIV	733441	733440	-	3UTR	INT_0_1601	INT_0_1601	sense	733440	733441	1	12.8264	10.4944	-1	1	2.33208
chrIV	751117	751118	-	CUTs	CUT508	ST4251	sense	751074	751128	54	27.4019	10.2029	7	7	27.1104
chrIV	763859	763859	-	3UTR	INT_0_1617	INT_0_1617	sense	763840	763860	20	4.08114	2.33208	17	5	4.08114
chrIV	768333	768338	-	CUTs	CUT509	ST4255	sense	768298	768379	81	89.2021	9.32832	43	39	2.14978
chrIV	769399	769399	-	intergenic_region	INT_0_1623	INT_0_1623	sense	769361	769448	87	9.91134	2.04057	34	11	9.61983
chrIV	769812	769834	-	CUTs	CUT510	ST4257	sense	769548	769981	433	82.4973	2.04057	247	121	41.8722
chrIV	802077	802077	-	CDS	SEC7	YDR170C	sense	802069	802078	9	2.33208	2.04057	-1	1	2.33208
chrIV	802768	802767	-	tRNA	tQ(UUG)D3	tQ(UUG)D3	sense	802758	802789	31	11.6604	4.08114	7	7	11.3689
chrIV	815973	815973	-	antisense_CDS	INT_0_1654	INT_0_1654	sense	815907	815984	77	10.2029	2.33208	58	14	9.91134
chrIV	831732	831725	-	3UTR	ATC1	YDR184C	sense	831725	831802	77	23.3208	7.28775	61	21	2.03022
chrIV	840410	840410	-	intergenic_region	INT_0_1672	INT_0_1672	sense	840403	840411	8	3.49812	2.04057	2	3	3.49812
chrIV	840502	840492	-	3UTR	INT_0_1672	INT_0_1672	sense	840492	840502	10	9.61983	7.28775	9	3	2.33208
chrIV	856868	856868	-	3UTR	RAV2	YDR202C	sense	856868	856876	8	3.78963	3.49812	-1	1	3.49812
chrIV	892126	892116	-	CUTs	XUT_4R-364	571910	sense	891937	892193	256	77.8332	4.66416	118	73	77.5417
chrIV	914703	914703	-	CDS	HTB1	YDR224C	sense	914637	914787	150	13.118	2.04057	83	23	5.34539
chrIV	915983	915983	-	intergenic_region	INT_0_1720	INT_0_1720	sense	915910	916003	93	12.8264	3.78963	50	15	4.45449
chrIV	945753	945753	-	intergenic_region	INT_0_1740	INT_0_1740	sense	945718	945769	51	5.53869	2.04057	28	8	4.95567
chrIV	964630	964629	-	5UTR	MET32	YDR253C	sense	964630	964662	32	6.70473	2.33208	6	4	5.87993
chrIV	965298	965297	-	antisense_CDS	INT_0_1758	INT_0_1758	sense	965298	965299	1	2.62359	2.33208	-1	1	2.33208
chrIV	965424	965427	-	3UTR	XUT_4R-393	571915	sense	965379	965447	68	10.2029	4.37265	18	6	3.24542
chrIV	968008	968008	-	3UTR	INT_0_1760	INT_0_1760	sense	968007	968011	4	6.99624	4.66416	2	2	4.95567
chrIV	974503	974498	-	3UTR	INT_0_1764	INT_0_1764	sense	974493	974541	48	13.118	4.08114	35	10	2.60906
chrIV	1013106	1013018	-	intergenic_region	INT_0_1793	INT_0_1793	sense	1012848	1013107	259	56.2614	4.95567	195	72	3.82953
chrIV	1024939	1024935	-	intergenic_region	INT_0_1805	INT_0_1805	sense	1024935	1024939	4	13.118	5.24718	3	4	2.40543
chrIV	1038072	1038071	-	3UTR	INT_0_1813	INT_0_1813	sense	1038072	1038073	1	6.41322	6.41322	-1	1	6.41322
chrIV	1059094	1059094	-	intergenic_region	INT_0_1825	INT_0_1825	sense	1059085	1059159	74	9.61983	2.04057	49	13	9.32832
chrIV	1095388	1095388	-	tRNA	tF(GAA)D	tF(GAA)D	sense	1095359	1095412	53	20.9887	2.62359	35	23	20.1142
chrIV	1125244	1125244	-	3UTR	INT_0_1866	INT_0_1866	sense	1125244	1125245	1	2.62359	2.33208	-1	1	2.33208
chrIV	1166198	1166178	-	CUTs	CUT523	ST4362	sense	1165964	1166311	347	96.4898	7.57926	158	93	15.2067
chrIV	1172263	1172246	-	3UTR	INT_0_1901	INT_0_1901	sense	1172220	1172263	43	20.4057	4.95567	27	17	2.72409
chrIV	1176033	1176025	-	3UTR	INT_0_1904	INT_0_1904	sense	1176025	1176033	8	11.3689	4.08114	7	7	2.08804
chrIV	1195157	1195156	-	3UTR	EAF1	YDR359C	sense	1195155	1195164	9	15.45	7.87077	4	4	2.04383
chrIV	1220946	1220950	-	3UTR	INT_0_1937	INT_0_1937	sense	1220909	1220955	46	21.2802	3.20661	35	17	2.18675
chrIV	1267347	1267347	-	intergenic_region	INT_0_1975	INT_0_1975	sense	1267347	1267348	1	2.04057	2.04057	-1	1	2.04057
chrIV	1269407	1269407	-	CUTs	CUT528	ST4397	sense	1269307	1269573	266	26.2359	2.04057	161	45	19.8225
chrIV	1272170	1272170	-	intergenic_region	INT_0_1977	INT_0_1977	sense	1272169	1272174	5	4.66416	2.33208	0	2	4.37265
chrIV	1311736	1311736	-	intergenic_region	INT_0_2001	INT_0_2001	sense	1311726	1311766	40	9.03681	4.95567	24	5	7.75082
chrIV	1315035	1315012	-	3UTR	INT_0_2007	INT_0_2007	sense	1315011	1315035	24	14.867	7.87077	8	6	3.56359
chrIV	1319361	1319361	-	3UTR	DYN2	YDR424C	sense	1319358	1319366	8	5.53869	2.33208	6	5	3.56359
chrIV	1321501	1321493	-	antisense_CDS	INT_0_2012	INT_0_2012	sense	1321305	1321646	341	97.0728	3.20661	182	102	96.7813
chrIV	1345327	1345327	-	intergenic_region	INT_0_2032	INT_0_2032	sense	1345327	1345332	5	3.20661	2.62359	-1	1	2.62359
chrIV	1359062	1359062	-	intergenic_region	INT_0_2041	INT_0_2041	sense	1359056	1359101	45	6.12171	2.9151	9	6	5.8302
chrIV	1417303	1417303	-	intergenic_region	INT_0_2083	INT_0_2083	sense	1417303	1417319	16	4.95567	2.04057	2	3	4.66416
chrIV	1449966	1449964	-	antisense_CDS	INT_0_2106	INT_0_2106	sense	1449964	1450024	60	13.118	2.9151	39	12	3.22296
chrIV	1471443	1471443	-	3UTR	INT_0_2126	INT_0_2126	sense	1471443	1471450	7	4.37265	2.04057	5	5	2.17157
chrIV	1471482	1471478	-	3UTR	YDR514C	YDR514C	sense	1471476	1471482	6	9.61983	5.24718	3	5	4.00904
chrIV	1476477	1476470	-	5UTR	EMI2	YDR516C	sense	1476290	1476588	298	121.56	9.03681	95	76	7.61535
chrIV	1487270	1487268	-	3UTR	INT_0_2142	INT_0_2142	sense	1487268	1487270	2	16.9076	13.118	0	2	3.78963
chrIV	1491788	1491788	-	snoRNA_1000_nt_downstream	YDR526C	YDR526C	sense	1491762	1491824	62	12.5349	4.66416	24	12	10.9581
chrIV	1492452	1492449	-	snoRNA_1000_nt_downstream	YDR526C	YDR526C	sense	1492020	1492570	550	678.927	141.091	47	36	16.1193
chrIV	1495830	1495830	-	antisense_CDS	INT_0_2156	INT_0_2156	sense	1495799	1495831	32	6.12171	2.04057	17	6	6.12171
chrXIV	27166	27166	-	3UTR	INT_0_6984	INT_0_6984	sense	27134	27185	51	6.12171	2.9151	20	4	2.52421
chrXIV	31512	31512	-	CUTs	CUT795	ST6412	sense	31341	31521	180	21.5717	2.62359	98	32	13.9362
chrXIV	63404	63401	-	3UTR	INT_0_7012	INT_0_7012	sense	63401	63404	3	72.003	60.3426	-1	1	2.13816
chrXIV	94871	94871	-	intergenic_region	INT_0_7033	INT_0_7033	sense	94789	94895	106	6.41322	2.33208	77	9	6.12171
chrXIV	110763	110763	-	XUTs	XUT_14R-40	572883	sense	110763	110789	26	5.53869	2.62359	17	5	5.24718
chrXIV	117068	117068	-	3UTR	INT_0_7054	INT_0_7054	sense	117068	117078	10	5.24718	2.04057	8	5	3.05451
chrXIV	172425	172433	-	3UTR	INT_0_7086	INT_0_7086	sense	172412	172467	55	31.1916	8.7453	23	14	5.73516
chrXIV	172511	172510	-	3UTR	INT_0_7086	INT_0_7086	sense	172504	172540	36	35.2727	14.867	7	6	5.34539
chrXIV	174327	174333	-	5UTR	NRD1	YNL251C	sense	174308	174510	202	69.6709	3.78963	118	71	8.79762
chrXIV	191931	191931	-	antisense_CDS	INT_0_7097	INT_0_7097	sense	191927	191970	43	4.08114	2.33208	35	4	3.78963
chrXIV	204899	204900	-	XUTs	INT_0_7106	INT_0_7106	sense	204892	204906	14	18.6566	11.0774	6	5	2.50565
chrXIV	214763	214763	-	intergenic_region	INT_0_7112	INT_0_7112	sense	214725	214773	48	9.91134	3.49812	12	7	9.61983
chrXIV	222616	222585	-	3UTR	INT_0_7120	INT_0_7120	sense	222585	222616	31	13.4095	9.91134	25	4	2.6727
chrXIV	224938	224938	-	CDS	SQS1	YNL224C	sense	224938	224962	24	3.20661	2.04057	13	3	2.9151
chrXIV	230162	230061	-	snRNA	SNR19	snR19	sense	229991	230189	198	884.15	214.843	118	94	3.23885
chrXIV	251116	251116	-	5UTR	YNL211C	YNL211C	sense	251096	251244	148	9.03681	2.33208	123	16	2.50565
chrXIV	275701	275701	-	CUTs	CUT806	ST6487	sense	275494	275867	373	65.8813	2.04057	221	100	37.5848
chrXIV	304818	304809	-	3UTR	INT_0_7180	INT_0_7180	sense	304807	304818	11	22.4463	12.5349	8	8	2.6727
chrXIV	322123	322120	-	3UTR	INT_0_7191	INT_0_7191	sense	322118	322134	16	19.2397	6.70473	12	8	2.44997
chrXIV	340950	340947	-	3UTR	INT_0_7204	INT_0_7204	sense	340947	340971	24	16.0331	6.41322	5	5	2.00452
chrXIV	352757	352757	-	3UTR	INT_0_7218	INT_0_7218	sense	352757	352762	5	2.9151	2.04057	3	2	2.62359
chrXIV	371107	371089	-	antisense_CDS	INT_0_7234	INT_0_7234	sense	371089	371117	28	10.4944	4.95567	17	7	2.92326
chrXIV	426858	426848	-	5UTR	LEU4	YNL104C	sense	426683	427006	323	148.379	8.16228	116	85	6.92719
chrXIV	505635	505639	-	intergenic_region	INT_0_7338	INT_0_7338	sense	505603	505685	82	13.9925	4.08114	19	12	2.99087
chrXIV	507153	507157	-	5UTR	YDJ1	YNL064C	sense	507005	507281	276	161.205	6.99624	131	93	7.02537
chrXIV	515349	515349	-	3UTR	INT_0_7345	INT_0_7345	sense	515349	515373	24	6.70473	4.37265	20	3	4.00904
chrXIV	525622	525622	-	CUTs	XUT_14R-219	572916	sense	525434	525769	335	50.1397	2.62359	230	82	16.3225
chrXIV	570006	570006	-	tRNA_100_nt_upstream	INT_0_7386	INT_0_7386	sense	569997	570023	26	8.16228	2.04057	9	8	7.87077
chrXIV	587003	587001	-	3UTR	INT_0_7403	INT_0_7403	sense	586975	587058	83	26.8189	10.2029	14	11	4.2954
chrXIV	611754	611743	-	3UTR	INT_0_7423	INT_0_7423	sense	611743	611755	12	18.6566	9.61983	3	4	2.06918
chrXIV	625981	625981	-	intergenic_region	INT_0_7436	INT_0_7436	sense	625956	626034	78	21.5717	5.8302	46	16	2.13816
chrXIV	628889	628889	-	intergenic_region	INT_0_7437	INT_0_7437	sense	628884	628906	22	6.41322	2.9151	9	7	6.12171
chrXIV	631840	631839	-	tRNA_100_nt_downstream	INT_0_7440	INT_0_7440	sense	631819	631843	24	37.6048	10.4944	10	12	7.22843
chrXIV	635835	635835	-	SUTs	SUT753	ST6584	sense	635795	635897	102	18.3651	4.08114	49	17	5.17835
chrXIV	655788	655788	-	CDS	ACC1	YNR016C	sense	655784	655805	21	7.87077	3.49812	2	3	7.57926
chrXIV	663760	663759	-	intergenic_region	INT_0_7466	INT_0_7466	sense	663737	663784	47	8.45379	2.33208	9	6	4.67722
chrXIV	677086	677086	-	3UTR	INT_0_7475	INT_0_7475	sense	677086	677091	5	8.7453	3.49812	4	4	2.33861
chrXIV	707266	707266	-	CUTs	XUT_14R-308	572932	sense	707113	707386	273	27.6935	2.33208	200	51	11.4197
chrXIV	713907	713907	-	3UTR	MSO1	YNR049C	sense	713881	713914	33	6.12171	2.04057	6	4	4.08114
chrXIV	721772	721772	-	snoRNA_1000_nt_downstream	NOG2	YNR053C	sense	721757	721828	71	48.9737	16.9076	29	25	22.1834
chrXIV	723192	723192	-	3UTR	INT_0_7508	INT_0_7508	sense	723192	723199	7	3.20661	2.04057	5	3	2.62359
chrXIV	728171	728171	-	intergenic_region	INT_0_7513	INT_0_7513	sense	728167	728172	5	3.49812	2.33208	0	2	3.49812
chrXII	131039	131039	-	3UTR	INT_0_5583	INT_0_5583	sense	131005	131082	77	14.5755	3.20661	42	16	2.89542
chrXII	131098	131097	-	3UTR	INT_0_5583	INT_0_5583	sense	131097	131098	1	12.2434	10.2029	-1	1	2.04057
chrXII	154177	154177	-	intergenic_region	INT_0_5598	INT_0_5598	sense	154174	154201	27	7.28775	2.04057	11	5	2.29088
chrXII	165341	165333	-	3UTR	INT_0_5604	INT_0_5604	sense	165328	165341	13	12.2434	7.87077	7	6	2.8636
chrXII	178606	178598	-	3UTR	INT_0_5615	INT_0_5615	sense	178592	178607	15	15.7415	5.53869	12	9	2.30405
chrXII	184110	184109	-	3UTR	INT_0_5619	INT_0_5619	sense	184109	184110	1	18.9482	15.7415	-1	1	3.20661
chrXII	231406	231406	-	intergenic_region	INT_0_5658	INT_0_5658	sense	231387	231413	26	4.66416	2.9151	8	4	4.37265
chrXII	264810	264813	-	CUTs	CUT733	ST5906	sense	264648	265081	433	67.0473	2.33208	251	96	27.8203
chrXII	318054	318034	-	3UTR	INT_0_5719	INT_0_5719	sense	318030	318147	117	44.3095	5.24718	97	28	2.10196
chrXII	341126	341126	-	intergenic_region	INT_0_5734	INT_0_5734	sense	340829	341198	369	38.7708	2.62359	280	70	38.4793
chrXII	348400	348306	-	snoRNA_1000_nt_downstream	INT_0_5740	INT_0_5740	sense	347946	348430	484	390.04	18.6566	214	157	61.6103
chrXII	348531	348538	-	snoRNA_300_nt_upstream	INT_0_5741	INT_0_5741	sense	348517	348604	87	166.161	41.1029	12	14	23.6367
chrXII	351089	351081	-	CDS	MDN1	YLR106C	sense	351081	351102	21	16.0331	4.08114	14	6	2.43406
chrXII	364027	364025	-	CUTs	CUT734	ST5938	sense	363905	364096	191	64.4237	7.57926	74	60	11.5995
chrXII	402539	402538	-	3UTR	INT_0_5773	INT_0_5773	sense	402531	402583	52	6.12171	2.9151	6	4	3.34087
chrXII	449949	449949	-	intergenic_region	INT_0_5813	INT_0_5813	sense	449947	449950	3	17.1991	16.6161	-1	1	8.7605
chrXII	488875	488875	-	intergenic_region	INT_0_5835	INT_0_5835	sense	488875	488876	1	3.78963	3.78963	-1	1	3.78963
chrXII	489747	489747	-	antisense_CDS	INT_0_5835	INT_0_5835	sense	489743	489750	7	4.08114	2.04057	3	4	3.78963
chrXII	501181	501181	-	3UTR	INT_0_5852	INT_0_5852	sense	501179	501182	3	3.49812	2.04057	1	3	3.20661
chrXII	549400	549400	-	3UTR	INT_0_5886	INT_0_5886	sense	549399	549402	3	4.95567	2.33208	1	3	2.07876
chrXII	563452	563449	-	3UTR	INT_0_5896	INT_0_5896	sense	563449	563453	4	10.2029	3.78963	3	3	2.29088
chrXII	587564	587563	-	3UTR	INT_0_5912	INT_0_5912	sense	587563	587564	1	7.87077	5.53869	0	2	2.33208
chrXII	628554	628551	-	intergenic_region	INT_0_5946	INT_0_5946	sense	628490	628656	166	42.269	3.20661	88	35	2.74906
chrXII	657706	657712	-	CUTs	XUT_12R-237	572666	sense	657504	657830	326	70.5454	2.9151	172	81	46.0086
chrXII	669152	669153	-	intergenic_region	INT_0_5975	INT_0_5975	sense	669152	669194	42	11.0774	3.20661	26	11	3.89768
chrXII	672514	672535	-	CUTs	CUT744	ST6023	sense	672353	672742	389	90.9511	3.20661	211	121	90.6596
chrXII	747206	747207	-	intergenic_region	INT_0_6042	INT_0_6042	sense	747161	747261	100	15.7415	5.24718	18	10	15.45
chrXII	783430	783424	-	5UTR	TMA10	YLR327C	sense	783404	783432	28	10.7859	3.20661	14	7	2.13816
chrXII	789580	789580	-	CUTs	CUT747	ST6063	sense	789580	789627	47	7.28775	2.33208	25	11	6.99624
chrXII	793263	793263	-	CUTs	CUT748	ST6065	sense	793214	793361	147	20.9887	2.04057	101	32	8.62552
chrXII	794265	794278	-	snoRNA_1000_nt_downstream	CUT748	ST6065	sense	794018	794505	487	616.544	18.9482	280	222	19.218
chrXII	794820	794836	-	snoRNA_1000_nt_downstream	INT_0_6078	INT_0_6078	sense	794651	794980	329	1251.74	120.394	114	99	22.9478
chrXII	795145	795142	-	snoRNA_300_nt_upstream	INT_0_6079	INT_0_6079	sense	795096	795173	77	85.1209	28.2765	11	13	21.6043
chrXII	806830	806830	-	intergenic_region	INT_0_6087	INT_0_6087	sense	806830	806838	8	4.08114	2.62359	1	3	3.78963
chrXII	808178	808178	-	SUTs	SUT707	ST6070	sense	808178	808181	3	4.08114	2.9151	2	2	2.9151
chrXII	827868	827848	-	CDS	DIC1	YLR348C	sense	827643	827947	304	89.7851	7.57926	144	81	12.8206
chrXII	855338	855338	-	XUTs	XUT_12R-313	572679	sense	855222	855447	225	34.3982	3.20661	155	59	34.1067
chrXII	877568	877567	-	intergenic_region	INT_0_6145	INT_0_6145	sense	877564	877607	43	11.3689	3.20661	5	7	11.0774
chrXII	888778	888776	-	3UTR	INT_0_6148	INT_0_6148	sense	888775	888778	3	31.7746	25.9444	-1	1	4.45449
chrXII	931620	931620	-	intron	YLR406C_intron	intergenic	sense	931483	931768	285	38.1878	2.04057	162	72	37.6048
chrXII	963121	963121	-	tRNA_100_nt_upstream	INT_0_6201	INT_0_6201	sense	963111	963134	23	12.5349	4.37265	8	7	11.6604
chrXII	1001783	1001749	-	5UTR	ATG23	YLR431C	sense	1001641	1001901	260	46.0586	2.62359	130	59	3.68082
chrXII	1013771	1013771	-	3UTR	INT_0_6225	INT_0_6225	sense	1013756	1013773	17	3.78963	2.04057	12	4	3.20661
chrXII	1038822	1038822	-	3UTR	INT_0_6244	INT_0_6244	sense	1038822	1038824	2	9.03681	4.37265	0	2	2.87829
chrXII	1052347	1052347	-	XUTs	XUT_12R-389	572692	sense	1052305	1052377	72	9.91134	2.33208	48	11	4.89994
chrXII	1052440	1052440	-	XUTs	XUT_12R-389	572692	sense	1052430	1052441	11	7.57926	5.53869	0	2	4.34313
chrV	15614	15659	-	CUTs	CUT541	ST4488	sense	15394	15865	471	129.43	4.37265	189	119	53.8184
chrV	52118	52061	-	snoRNA_1000_nt_downstream	INT_0_2565	INT_0_2565	sense	51607	52217	610	1479.12	615.669	323	216	68.4777
chrV	68801	68801	-	3UTR	GLY1	YEL046C	sense	68726	68836	110	19.5312	2.04057	69	27	11.0249
chrV	100238	100244	-	intergenic_region	INT_0_2607	INT_0_2607	sense	100215	100310	95	38.7708	5.53869	55	29	2.65245
chrV	117066	117066	-	intergenic_region	INT_0_2613	INT_0_2613	sense	117064	117179	115	9.03681	2.33208	72	14	8.7453
chrV	117665	117666	-	intergenic_region	INT_0_2616	INT_0_2616	sense	117640	117727	87	26.2359	5.24718	53	17	3.12987
chrV	117908	117887	-	ncRNA	RPR1	RPR1	sense	117783	117997	214	69.0879	6.41322	125	55	15.018
chrV	122291	122291	-	antisense_CDS	INT_0_2622	INT_0_2622	sense	122291	122298	7	3.49812	2.04057	5	4	2.09998
chrV	122311	122311	-	intergenic_region	INT_0_2622	INT_0_2622	sense	122311	122314	3	8.45379	4.37265	2	3	2.04907
chrV	131221	131220	-	tRNA_100_nt_upstream	INT_0_2631	INT_0_2631	sense	131209	131224	15	9.03681	2.9151	6	6	8.16228
chrV	139746	140262	-	CDS	GCN4	YEL009C	sense	139724	140319	595	122.143	7.87077	540	152	3.62723
chrV	167322	167322	-	CUTs	CUT549	ST4536	sense	167290	167430	140	216.3	30.6086	113	49	7.38981
chrV	210635	210635	-	3UTR	INT_0_2702	INT_0_2702	sense	210618	210638	20	8.16228	4.66416	8	4	2.13816
chrV	225121	225121	-	CDS	ARB1	YER036C	sense	225075	225240	165	25.9444	2.04057	95	37	25.6529
chrV	237438	237434	-	3UTR	INT_0_2721	INT_0_2721	sense	237433	237438	5	44.018	31.4831	1	3	2.39429
chrV	239820	239820	-	3UTR	INT_0_2724	INT_0_2724	sense	239796	239834	38	11.3689	2.62359	23	10	10.1562
chrV	239917	239906	-	3UTR	INT_0_2724	INT_0_2724	sense	239905	239920	15	114.272	37.3133	7	8	2.34969
chrV	258592	258588	-	3UTR	INT_0_2741	INT_0_2741	sense	258588	258592	4	17.7821	7.28775	1	3	2.00452
chrV	258628	258622	-	3UTR	PIC2	YER053C	sense	258620	258629	9	52.7633	32.6491	2	4	2.03908
chrV	281125	281125	-	intergenic_region	INT_0_2762	INT_0_2762	sense	281125	281160	35	4.08114	2.62359	27	4	3.78963
chrV	301723	301722	-	3UTR	CUT559	ST4588	sense	301722	301723	1	9.32832	6.99624	0	2	2.33208
chrV	302658	302620	-	CUTs	CUT560	ST4590	sense	302399	302658	259	124.766	19.5312	73	54	3.13261
chrV	312289	312289	-	3UTR	INT_0_2793	INT_0_2793	sense	312289	312296	7	5.8302	2.62359	4	3	3.24542
chrV	366565	366565	-	XUTs	XUT_5R-168	572019	sense	366565	366572	7	4.95567	3.78963	0	2	4.08114
chrV	409276	409275	-	CUTs	CUT564	ST4623	sense	409266	409298	32	9.03681	2.9151	22	10	8.01809
chrV	416287	416292	-	CUTs	CUT566	ST4626	sense	416011	416344	333	84.2464	4.37265	216	109	48.1085
chrV	431127	431134	-	snoRNA_1000_nt_downstream	INT_0_2881	INT_0_2881	sense	431008	431341	333	330.281	68.2133	199	70	15.4362
chrV	432557	432557	-	CUTs	CUT568	ST4631	sense	432418	432748	330	47.8076	2.04057	175	66	27.2281
chrV	438811	438811	-	intergenic_region	INT_0_2892	INT_0_2892	sense	438766	438817	51	6.99624	2.62359	15	7	6.70473
chrV	438984	438983	-	intergenic_region	INT_0_2892	INT_0_2892	sense	438848	439052	204	12.8264	2.62359	147	23	12.5349
chrV	462434	462434	-	CDS	YER145C-A	YER145C-A	sense	462422	462444	22	5.8302	3.49812	9	4	5.53869
chrV	469616	469614	-	3UTR	INT_0_2919	INT_0_2919	sense	469615	469616	1	42.852	38.1878	-1	1	4.66416
chrV	490707	490707	-	5UTR	YER158C	YER158C	sense	490578	490837	259	20.4057	2.04057	158	39	10.2453
chrV	491399	491392	-	3UTR	INT_0_2935	INT_0_2935	sense	491392	491399	7	30.0255	8.45379	3	5	2.01816
chrV	491416	491410	-	3UTR	BUR6	YER159C	sense	491410	491417	7	42.5605	20.9887	5	7	2.01844
chrV	509808	509715	-	CUTs	CUT570	ST4651	sense	509562	509842	280	42.269	3.49812	164	68	7.69736
chrV	544643	544700	-	CUTs	CUT571	ST4660	sense	544468	544970	502	106.984	2.9151	286	152	32.5178
chrV	549662	549660	-	3UTR	INT_0_2973	INT_0_2973	sense	549657	549666	9	22.7378	11.9519	3	4	2.49452
chrV	565497	565492	-	intergenic_region	INT_0_2987	INT_0_2987	sense	565466	565497	31	13.4095	6.99624	5	5	3.26663

## Sheet: rrp6_delta_DRS
chromosome	peak coord	center of mass coordinate for cluster	strand	annotation type	gene name	gene ID	strandedness	cluster start	cluster end	cluster width	total cluster reads	peak height (reads)	width around peak accounting for 80.0% of signal	distinct number of three prime ends accounting for 80.0% of signal	fold upregulation
chrIX	28588	28587.5	+	intergenic_region	XUT_9F-4	572304	sense	28381	28615	234	259	34	119	43	5.16
chrIX	28709	28709.8	+	intergenic_region	INT_0_2200	INT_0_2200	sense	28638	28777	139	49	10	65	19	48
chrIX	46063	46063	+	3UTR	BNR1	YIL159W	sense	46062	46064	2	6	5	-1	1	6
chrIX	96976	96976.8	+	snoRNA_300_nt_upstream	INT_0_2244	INT_0_2244	sense	96953	97013	60	1565	477	3	5	312.8
chrIX	97247	97246.6	+	snoRNA	FLX1	YIL134W	sense	97239	97268	29	1698	630	20	10	30.2
chrIX	97411	97405.2	+	snoRNA_300_nt_downstream	FLX1	YIL134W	sense	97305	97554	249	1663	69	134	114	110.6
chrIX	143067	143070	+	CDS	HIS5	YIL116W	sense	143063	143074	11	15	5	6	4	13
chrIX	163047	163047	+	3UTR	YIL108W	YIL108W	sense	163045	163052	7	8	4	4	3	2.33333
chrIX	167567	167567	+	3UTR	MOB1	YIL106W	sense	167567	167569	2	7	4	1	3	5
chrIX	188241	188342	+	CUTs	CUT188	ST1616	sense	188209	188674	465	153	4	367	102	152
chrIX	217609	217609	+	3UTR	SEC28	YIL076W	sense	217609	217610	1	5	5	-1	1	5
chrIX	221131	221131	+	CUTs	XUT_9F-111	572326	sense	221131	221133	2	5	4	1	2	4
chrIX	244001	244054	+	XUTs	XUT_9F-120	572329	sense	243999	244155	156	103	10	111	42	3.77778
chrIX	249952	249952	+	5UTR	VHR1	YIL056W	sense	249951	249954	3	10	4	2	4	4
chrIX	255143	255143	+	CDS	RHR2	YIL053W	sense	255101	255300	199	74	8	101	36	73
chrIX	310915	310914	+	intergenic_region	INT_0_2414	INT_0_2414	sense	310855	310946	91	41	16	35	9	40
chrIX	333635	333665	+	intergenic_region	INT_0_2436	INT_0_2436	sense	333629	333674	45	51	11	32	20	2.77778
chrIX	343011	343011	+	antisense_CDS	INT_0_2446	INT_0_2446	sense	342988	343012	24	13	4	22	7	6.5
chrIX	370350	370350	+	tRNA_100_nt_upstream	INT_0_2465	INT_0_2465	sense	370326	370352	26	17	7	12	6	16
chrIX	388456	388456	+	SUTs	XUT_9F-189	572341	sense	388453	388457	4	7	5	1	3	7
chrXIII	13878	13847.4	+	SUTs	XUT_13F-3	572694	sense	13652	13935	283	175	6	191	72	12.4286
chrXIII	15431	15431	+	CUTs	CUT280	ST2419	sense	15420	15474	54	14	4	41	9	13
chrXIII	22127	22127	+	antisense_CDS	INT_0_6282	INT_0_6282	sense	22098	22141	43	16	5	24	8	15
chrXIII	30370	30370	+	SUTs	SUT286	ST2423	sense	30358	30374	16	14	5	9	5	12
chrXIII	78332	78330	+	CUTs	CUT284	ST2440	sense	78330	78332	2	11	6	1	3	5
chrXIII	92017	92014.8	+	intergenic_region	INT_0_6334	INT_0_6334	sense	91998	92025	27	103	13	17	17	101
chrXIII	149069	149074	+	antisense_CDS	SUT293	ST2464	sense	149057	149135	78	60	12	52	22	9.83333
chrXIII	247564	247568	+	CUTs	CUT291	ST2496	sense	247559	247586	27	23	6	3	4	3.66667
chrXIII	256012	256005	+	3UTR	YAP1	YML007W	sense	256005	256012	7	21	15	0	2	6
chrXIII	297171	297172	+	snoRNA_300_nt_upstream	SUT298	ST2513	sense	297155	297243	88	576	331	3	2	575
chrXIII	297428	297427	+	snoRNA	SNR78	snR78	sense	297359	297441	82	1897	694	9	11	172.364
chrXIII	297591	297610	+	snoRNA	SNR77	snR77	sense	297566	297693	127	8052	1471	53	45	217.568
chrXIII	297850	297862	+	snoRNA_300_nt_downstream	YMR013W-A	YMR013W-A	sense	297828	297897	69	998	191	28	24	142.429
chrXIII	298002	298003	+	snoRNA	YMR013W-A	YMR013W-A	sense	298000	298047	47	2334	668	2	4	106.045
chrXIII	298243	298236	+	snoRNA	YMR013W-A	YMR013W-A	sense	298192	298254	62	218	43	27	16	215
chrXIII	298474	298468	+	snoRNA	SNR73	snR73	sense	298407	298497	90	4123	515	48	39	216.947
chrXIII	298669	298688	+	snoRNA	YMR013W-A	YMR013W-A	sense	298561	298741	180	3047	508	51	47	29.8529
chrXIII	349618	349618	+	intergenic_region	INT_0_6530	INT_0_6530	sense	349590	349633	43	36	5	31	12	11.3333
chrXIII	349928	349928	+	intergenic_region	INT_0_6530	INT_0_6530	sense	349923	349968	45	16	4	22	7	7.5
chrXIII	352333	352333	+	tRNA_100_nt_upstream	tF%28GAA%29M_intron	intergenic	sense	352322	352354	32	15	4	24	8	14
chrXIII	363000	362999	+	tRNA_100_nt_upstream	INT_0_6541	INT_0_6541	sense	362945	363008	63	117	31	9	11	38.6667
chrXIII	379250	379250	+	intergenic_region	INT_0_6546	INT_0_6546	sense	379236	379282	46	23	4	25	13	21
chrXIII	413782	413782	+	5UTR	RCO1	YMR075W	sense	413782	413783	1	4	4	-1	1	4
chrXIII	426405	426405	+	3UTR	SEC14	YMR079W	sense	426405	426406	1	7	5	0	2	5
chrXIII	436020	436020	+	3UTR	ADH3	YMR083W	sense	436020	436021	1	5	4	0	2	4
chrXIII	481372	481368	+	XUTs	XUT_13F-209	572733	sense	481368	481372	4	11	7	3	2	2
chrXIII	493929	493930	+	CUTs	XUT_13F-213	572734	sense	493845	493936	91	38	8	59	14	37
chrXIII	501315	501315	+	CUTs	CUT300	ST2578	sense	501262	501324	62	21	4	38	13	20
chrXIII	512131	512129	+	SUTs	SUT307	ST2583	sense	512129	512131	2	37	18	0	2	2.71429
chrXIII	512136	512141	+	SUTs	SUT307	ST2583	sense	512132	512145	13	99	31	8	9	2.30769
chrXIII	514059	514059	+	3UTR	PKR1	YMR123W	sense	514059	514067	8	5	4	7	2	4
chrXIII	535863	535863	+	CUTs	CUT302	ST2592	sense	535831	535864	33	16	4	29	9	7.5
chrXIII	626284	626284	+	snoRNA_300_nt_upstream	YMR182W-A	YMR182W-A	sense	626227	626320	93	1185	751	1	3	118.2
chrXIII	626672	626674	+	snoRNA_300_nt_downstream	YMR182W-A	YMR182W-A	sense	626660	626748	88	115	18	58	20	10.3636
chrXIII	626789	626830	+	snoRNA_300_nt_downstream	INT_0_6752	INT_0_6752	sense	626776	626995	219	590	31	90	68	49.0833
chrXIII	652738	652733	+	snoRNA	SNR11	snR11	sense	652485	652790	305	1274	118	158	123	8.8951
chrXIII	652856	652856	+	snoRNA_300_nt_downstream	CUT306	ST2634	sense	652819	652917	98	348	19	47	43	347
chrXIII	653072	653027	+	CUTs	CUT306	ST2634	sense	652955	653193	238	286	23	120	65	142.5
chrXIII	653889	653889	+	intergenic_region	XUT_13F-286	572748	sense	653888	653916	28	37	11	9	8	6
chrXIII	655057	655057	+	5UTR	YMR196W	YMR196W	sense	655010	655093	83	18	4	46	11	8.5
chrXIII	675674	675674	+	intergenic_region	INT_0_6788	INT_0_6788	sense	675669	675679	10	67	14	4	6	2.27586
chrXIII	749236	749236	+	antisense_CDS	INT_0_6829	INT_0_6829	sense	749236	749301	65	19	9	38	7	9
chrXIII	751985	751990	+	CDS	YHM2	YMR241W	sense	751916	751996	80	46	4	68	21	5
chrXIII	785055	785055	+	XUTs	XUT_13F-339	572754	sense	785055	785091	36	10	5	30	4	4.5
chrXIII	808023	808023	+	intergenic_region	INT_0_6881	INT_0_6881	sense	808018	808036	18	14	5	8	6	4.33333
chrXIII	814454	814454	+	CUTs	CUT310	ST2684	sense	814448	814456	8	9	6	1	3	8
chrXIII	830846	830845	+	antisense_CDS	INT_0_6896	INT_0_6896	sense	830845	830846	1	10	6	0	2	4
chrXIII	861807	861801	+	CUTs	XUT_13F-370	572761	sense	861772	861808	36	21	5	26	9	20
chrXIII	878852	878852	+	3UTR	UBP15	YMR304W	sense	878852	878853	1	5	5	0	2	5
chrII	5866	5866	+	CDS	YBL109W	YBL109W	sense	5847	5879	32	19	4	10	8	2.57143
chrII	13977	13977	+	intergenic_region	INT_0_223	INT_0_223	sense	13971	13979	8	12	4	1	3	4
chrII	88075	88076.2	+	snoRNA_300_nt_upstream	INT_0_264	INT_0_264	sense	88064	88117	53	98	28	37	12	97
chrII	88277	88355.7	+	snoRNA	SNR56	snR56	sense	88243	88481	238	5264	482	190	155	137.553
chrII	88514	88528.7	+	snoRNA_300_nt_downstream	INT_0_265	INT_0_265	sense	88504	88573	69	43	5	41	16	42
chrII	153743	153743	+	intergenic_region	INT_0_312	INT_0_312	sense	153743	153753	10	7	6	-1	1	6
chrII	164981	164981	+	SUTs	SUT006	ST0081	sense	164949	164990	41	20	5	28	9	19
chrII	292942	292953	+	antisense_CDS	INT_0_411	INT_0_411	sense	292936	292992	56	30	4	30	14	29
chrII	307021	307034	+	CUTs	CUT012	ST0122	sense	306978	307064	86	57	15	65	19	56
chrII	308865	308871	+	ncRNA	TLC1	TLC1	sense	308858	308921	63	64	7	32	23	2.69565
chrII	326744	326744	+	CUTs	CUT015	ST0129	sense	326726	326765	39	14	4	21	8	13
chrII	336911	336911	+	XUTs	XUT_2F-132	571615	sense	336901	336927	26	13	4	10	7	3
chrII	338756	338756	+	antisense_CDS	INT_0_451	INT_0_451	sense	338743	338764	21	7	4	11	3	6
chrII	350858	350858	+	tRNA	tQ(UUG)B	tQ(UUG)B	sense	350838	350862	24	13	4	17	7	12
chrII	366623	366623	+	CUTs	XUT_2F-146	571621	sense	366623	366666	43	19	5	31	10	4.5
chrII	376678	376678	+	CUTs	CUT021	ST0143	sense	376669	376734	65	27	4	43	16	26
chrII	382838	382835	+	3UTR	HSP26	YBR072W	sense	382816	382838	22	58	23	1	3	3.18182
chrII	392034	392038	+	XUTs	XUT_2F-166	571627	sense	392006	392227	221	96	5	132	43	23.75
chrII	408081	408082	+	intergenic_region	XUT_2F-169	571628	sense	408081	408098	17	25	4	15	11	5.75
chrII	423734	423745	+	CUTs	CUT024	ST0154	sense	423702	423842	140	156	8	71	48	155
chrII	424895	424894	+	3UTR	RFC5	YBR087W	sense	424894	424895	1	10	6	0	2	4
chrII	443881	443888	+	3UTR	MMS4	YBR098W	sense	443881	443890	9	16	5	7	4	2.6
chrII	453832	453832	+	SUTs	SUT017	ST0164	sense	453822	453852	30	17	5	21	7	5.33333
chrII	457840	457835	+	3UTR	AIM3	YBR108W	sense	457835	457840	5	13	5	4	4	2
chrII	483914	483940	+	CUTs	CUT026	ST0172	sense	483834	484110	276	111	6	202	61	9.16667
chrII	571784	571816	+	CUTs	CUT028	ST0199	sense	571681	571941	260	128	4	187	63	127
chrII	576675	576675	+	CUTs	CUT029	ST0201	sense	576591	576770	179	44	4	124	27	43
chrII	596051	596051	+	5UTR	YPC1	YBR183W	sense	596051	596074	23	19	9	9	5	2.42857
chrII	596164	596164	+	CDS	YPC1	YBR183W	sense	596129	596261	132	58	5	71	26	8
chrII	605900	605900	+	intergenic_region	INT_0_646	INT_0_646	sense	605898	605945	47	13	4	31	8	4
chrII	614789	614789	+	CUTs	XUT_2F-242	571637	sense	614641	614804	163	74	4	140	40	72
chrII	615222	615222	+	XUTs	XUT_2F-242	571637	sense	615214	615256	42	11	5	26	5	2
chrII	645098	645098	+	tRNA_100_nt_upstream	XUT_2F-258	571639	sense	645091	645099	8	12	7	0	2	12
chrII	723721	723721	+	3UTR	SRB6	YBR253W	sense	723721	723724	3	7	5	0	2	2
chrII	727043	727043	+	antisense_CDS	INT_0_742	INT_0_742	sense	727038	727045	7	18	4	4	5	3.4
chrII	727428	727428	+	antisense_CDS	INT_0_742	INT_0_742	sense	727428	727465	37	9	4	31	4	8
chrII	777873	777873	+	3UTR	YBR287W	YBR287W	sense	777873	777874	1	6	4	0	2	4
chrII	779301	779302	+	antisense_CDS	INT_0_782	INT_0_782	sense	779222	779312	90	43	5	68	15	41
chrII	779552	779552	+	intergenic_region	INT_0_782	INT_0_782	sense	779552	779553	1	6	6	0	2	6
chrVI	74662	74661	+	intergenic_region	INT_0_3041	INT_0_3041	sense	74645	74685	40	90	30	9	9	8.8
chrVI	104721	104721	+	antisense_CDS	INT_0_3069	INT_0_3069	sense	104705	104722	17	7	4	0	2	7
chrVI	110602	110606	+	5UTR	SUT105	ST0998	sense	110528	110712	184	76	9	157	33	5.35714
chrVI	115101	115101	+	CDS	AUA1	YFL010W-A	sense	115101	115198	97	37	4	76	21	18
chrVI	164960	164960	+	intergenic_region	INT_0_3112	INT_0_3112	sense	164949	164970	21	11	4	8	4	3.33333
chrVI	223420	223420	+	antisense_CDS	INT_0_3149	INT_0_3149	sense	223355	223421	66	22	4	41	13	22
chrI	18273	18273	+	intergenic_region	INT_0_60	INT_0_60	sense	18273	18289	16	7	4	9	2	3
chrI	30777	30777	+	CUTs	XUT_1F-15	571568	sense	30752	30822	70	19	4	58	13	18
chrI	30904	30903	+	CUTs	XUT_1F-15	571568	sense	30890	30905	15	14	5	2	4	13
chrI	142247	142247	+	snoRNA_300_nt_upstream	EFB1	YAL003W	sense	142247	142253	6	14	8	1	3	12
chrI	142336	142336	+	snoRNA_300_nt_upstream	YAL003W_intron	intergenic	sense	142336	142363	27	8	5	22	3	7
chrI	142484	142485	+	snoRNA	YAL003W_intron	intergenic	sense	142455	142514	59	8324	1583	22	24	320.115
chrI	142612	142608	+	snoRNA_300_nt_downstream	YAL003W_intron	intergenic	sense	142556	142642	86	2962	727	22	24	185.062
chrI	156005	156005	+	CDS	SWD1	YAR003W	sense	156005	156006	1	5	4	0	2	4
chrI	166202	166202	+	tRNA_100_nt_upstream	INT_0_160	INT_0_160	sense	166166	166211	45	88	15	9	10	21.75
chrI	227777	227777	+	CDS	IMD1	YAR073W	sense	227761	227778	17	7	4	7	2	7
chrXII	67671	67670.8	+	3UTR	YLL037W	YLL037W	sense	67670	67693	23	33	11	18	7	31
chrXII	99067	99067.8	+	CUTs	CUT246	ST2136	sense	98996	99102	106	53	11	63	20	26
chrXII	109661	109661	+	CUTs	CUT248	ST2139	sense	109661	109712	51	15	4	33	7	14
chrXII	127338	127338	+	3UTR	YEH1	YLL012W	sense	127338	127344	6	16	10	0	2	2.5
chrXII	158127	158138	+	SUTs	SUT247	ST2152	sense	158112	158197	85	96	7	62	34	95
chrXII	158249	158249	+	SUTs	SUT247	ST2152	sense	158221	158306	85	33	5	57	16	32
chrXII	168886	168885	+	intergenic_region	INT_0_5607	INT_0_5607	sense	168848	168896	48	39	10	10	10	38
chrXII	199243	199256	+	snoRNA	SNR30	snR30	sense	199203	199317	114	53	4	83	28	52
chrXII	199531	199537	+	snoRNA_300_nt_downstream	INT_0_5631	INT_0_5631	sense	199392	199723	331	7854	337	129	123	75.5096
chrXII	203278	203278	+	intergenic_region	INT_0_5634	INT_0_5634	sense	203249	203299	50	24	5	24	11	23
chrXII	230207	230207	+	3UTR	YLR041W	YLR041W	sense	230127	230244	117	40	4	92	27	39
chrXII	230601	230604	+	3UTR	YLR041W	YLR041W	sense	230592	230651	59	85	16	43	14	3.95238
chrXII	231724	231699	+	SUTs	SUT251	ST2173	sense	231530	231798	268	170	6	166	74	15.3636
chrXII	249317	249317	+	CUTs	CUT254	ST2180	sense	249315	249336	21	19	5	12	8	17
chrXII	260805	260805	+	5UTR	SUT255	ST2183	sense	260805	260815	10	10	4	7	6	9
chrXII	366312	366321	+	snRNA	SNR6	snR6	sense	366293	366347	54	1152	169	24	20	164.286
chrXII	371292	371292	+	3UTR	YLR112W	YLR112W	sense	371286	371313	27	16	4	8	7	15
chrXII	388899	388885	+	3UTR	YLR120W-A	YLR120W-A	sense	388784	388956	172	142	7	133	64	141
chrXII	389173	389178	+	3UTR	YLR120W-A	YLR120W-A	sense	389072	389199	127	50	4	97	25	49
chrXII	390390	390390	+	3UTR	YLR120W-A	YLR120W-A	sense	390389	390401	12	12	4	10	5	3.33333
chrXII	390432	390431	+	intergenic_region	INT_0_5761	INT_0_5761	sense	390431	390434	3	27	14	1	3	3.125
chrXII	396993	396993	+	CUTs	CUT258	ST2227	sense	396993	396994	1	5	5	-1	1	5
chrXII	410728	410792	+	CDS	PDC5	YLR134W	sense	410719	410803	84	33	5	71	15	3.55556
chrXII	412536	412535	+	3UTR	PDC5	YLR134W	sense	412515	412536	21	25	16	1	3	4.5
chrXII	450101	450101	+	SUTs	SUT264	ST2248	sense	450032	450254	222	63	7	134	34	62
chrXII	450822	450822	+	intergenic_region	INT_0_5814	INT_0_5814	sense	450819	450839	20	28	12	0	2	5.4
chrXII	451440	451440	+	intergenic_region	INT_0_5814	INT_0_5814	sense	451440	451441	1	4	4	-1	1	4
chrXII	459929	459929	+	intergenic_region	INT_0_5819	INT_0_5819	sense	459862	459991	129	30	6	93	16	4.83333
chrXII	460527	460531	+	XUTs	XUT_12F-188	572606	sense	460422	460593	171	4613	753	39	40	242.684
chrXII	490651	490651	+	intergenic_region	INT_0_5839	INT_0_5839	sense	490644	490653	9	17	7	5	4	8
chrXII	499471	499471	+	3UTR	RPS31	YLR167W	sense	499471	499472	1	5	4	0	2	4
chrXII	542220	542220	+	CUTs	CUT265	ST2269	sense	542193	542264	71	43	6	43	17	42
chrXII	542334	542334	+	CUTs	CUT265	ST2269	sense	542334	542504	170	45	8	112	27	22
chrXII	543393	543393	+	XUTs	XUT_12F-209	572611	sense	543393	543431	38	21	4	36	11	10
chrXII	547479	547479	+	CDS	NOP56	YLR197W	sense	547479	547480	1	5	5	-1	1	5
chrXII	645882	645881	+	antisense_CDS	INT_0_5959	INT_0_5959	sense	645863	645894	31	27	5	13	11	26
chrXII	657271	657271	+	XUTs	XUT_12F-257	572620	sense	657270	657272	2	7	5	0	2	6
chrXII	669436	669406	+	SUTs	SUT279	ST2307	sense	669370	669502	132	75	7	111	38	14.4
chrXII	669574	669574	+	antisense_CDS	INT_0_5976	INT_0_5976	sense	669530	669621	91	26	4	60	17	25
chrXII	675097	675097	+	CUTs	CUT267	ST2310	sense	675074	675113	39	77	16	17	12	6.33333
chrXII	705160	705160	+	5UTR	INT_0_6002	INT_0_6002	sense	705160	705292	132	45	4	97	28	5.5
chrXII	719882	719878	+	CUTs	CUT269	ST2322	sense	719778	719921	143	75	9	84	33	73
chrXII	793848	793848	+	tRNA_100_nt_upstream	INT_0_6074	INT_0_6074	sense	793790	793856	66	49	10	39	12	6
chrXII	797112	797111	+	tRNA_100_nt_upstream	INT_0_6075	INT_0_6075	sense	797104	797114	10	51	20	2	4	49
chrXII	827112	827102	+	antisense_CDS	INT_0_6099	INT_0_6099	sense	826944	827197	253	207	14	137	71	25.75
chrXII	856095	856096	+	5UTR	RPS22B	YLR367W	sense	856068	856134	66	541	253	6	7	60
chrXII	856985	856971	+	snoRNA_300_nt_downstream	YLR367W_intron	intergenic	sense	856922	856994	72	62	16	44	11	61
chrXII	857055	857055	+	snoRNA_300_nt_downstream	YLR367W_intron	intergenic	sense	857019	857074	55	22	7	11	5	10.5
chrXII	874973	874973	+	SUTs	SUT281	ST2367	sense	874968	875011	43	12	4	34	6	2.75
chrXII	899408	899510	+	snoRNA_300_nt_downstream	ECM19	YLR390W	sense	899337	899951	614	5719	478	165	113	121.638
chrXII	899980	899980	+	5UTR	ECM19	YLR390W	sense	899977	900024	47	14	4	28	9	13
chrXII	906900	906900	+	CUTs	CUT275	ST2377	sense	906889	906924	35	33	8	8	9	3.2
chrXII	911373	911371	+	CUTs	SUT282	ST2379	sense	911349	911383	34	34	9	5	7	4.125
chrXII	912470	912470	+	CUTs	CUT276	ST2380	sense	912468	912512	44	24	8	33	9	4.4
chrXII	993006	993006	+	intergenic_region	INT_0_6215	INT_0_6215	sense	993006	993007	1	4	4	-1	1	4
chrXII	1002511	1.00256e+06	+	5UTR	IMD3	YLR432W	sense	1002461	1002747	286	880	64	130	107	97.6667
chrXII	1018008	1018008	+	intergenic_region	INT_0_6228	INT_0_6228	sense	1017991	1018009	18	12	4	8	6	6
chrXII	1028366	1028366	+	intergenic_region	CUT277	ST2405	sense	1028317	1028367	50	13	5	23	6	13
chrXII	1039142	1039142	+	intergenic_region	INT_0_6245	INT_0_6245	sense	1039141	1039143	2	5	4	1	3	5
chrXIV	43407	43407	+	antisense_CDS	INT_0_6997	INT_0_6997	sense	43384	43527	143	21	4	116	13	20
chrXIV	89137	89136.7	+	snoRNA_300_nt_upstream	INT_0_7030	INT_0_7030	sense	89096	89146	50	2048	831	2	4	170.5
chrXIV	89369	89352.9	+	snoRNA	SNR40	snR40	sense	89216	89375	159	657	185	63	18	38.5294
chrXIV	90025	90025	+	intergenic_region	INT_0_7032	INT_0_7032	sense	90025	90026	1	8	4	0	2	4
chrXIV	145820	145820	+	CUTs	CUT317	ST2745	sense	145766	145823	57	16	5	49	7	15
chrXIV	169983	169983	+	5UTR	INT_0_7084	INT_0_7084	sense	169889	170039	150	49	4	111	28	5.33333
chrXIV	218327	218315	+	CUTs	CUT322	ST2768	sense	218191	218446	255	105	6	138	47	104
chrXIV	234372	234397	+	5UTR	CUT325	ST2773	sense	234323	234469	146	85	5	114	35	84
chrXIV	282196	282208	+	5UTR	YNL190W	YNL190W	sense	282181	282291	110	56	13	52	21	55
chrXIV	322215	322215	+	intergenic_region	INT_0_7190	INT_0_7190	sense	322196	322229	33	9	5	18	4	2.66667
chrXIV	335331	335331	+	3UTR	CBK1	YNL161W	sense	335321	335374	53	30	7	20	8	2.63636
chrXIV	349169	349169	+	CUTs	CUT332	ST2815	sense	349102	349213	111	39	4	80	21	38
chrXIV	357499	357492	+	CDS	MEP2	YNL142W	sense	357461	357527	66	56	7	31	19	6.11111
chrXIV	374187	374187	+	SUTs	XUT_14F-142	572850	sense	374179	374212	33	13	4	24	5	12
chrXIV	412580	412579	+	intergenic_region	INT_0_7263	INT_0_7263	sense	412565	412584	19	18	7	2	4	17
chrXIV	415572	415572	+	intron	YNL112W_intron	intergenic	sense	415565	415596	31	50	18	6	6	3.76923
chrXIV	416465	416465	+	intergenic_region	INT_0_7267	INT_0_7267	sense	416454	416467	13	18	5	9	5	3.4
chrXIV	439571	439571	+	intergenic_region	INT_0_7283	INT_0_7283	sense	439548	439584	36	22	4	10	9	2.1
chrXIV	442940	442939	+	tRNA_100_nt_upstream	INT_0_7287	INT_0_7287	sense	442914	442942	28	18	5	12	7	17
chrXIV	452320	452320	+	5UTR	NST1	YNL091W	sense	452320	452321	1	5	4	0	2	4
chrXIV	462357	462357	+	5UTR	TCB2	YNL087W	sense	462357	462358	1	6	4	0	2	4
chrXIV	500670	500666	+	CUTs	CUT337	ST2871	sense	500587	500784	197	1361	565	31	27	170
chrXIV	525913	525912	+	intergenic_region	INT_0_7351	INT_0_7351	sense	525911	525927	16	16	8	3	3	15
chrXIV	560565	560565	+	3UTR	NCE103	YNL036W	sense	560563	560572	9	19	11	1	3	4.5
chrXIV	568047	568047	+	tRNA_100_nt_upstream	INT_0_7382	INT_0_7382	sense	568045	568050	5	48	21	3	4	20
chrXIV	585917	585913	+	snoRNA	NME1	NME1	sense	585781	585939	158	241	24	43	32	240
chrXIV	586178	586268	+	snoRNA	SNR66	snR66	sense	586167	586388	221	2653	283	200	123	120.409
chrXIV	586469	586471	+	snoRNA_300_nt_downstream	CUT342	ST2901	sense	586427	586689	262	892	59	115	79	178.2
chrXIV	587388	587388	+	SUTs	SUT335	ST2903	sense	587320	587444	124	43	4	78	23	42
chrXIV	602248	602248	+	tRNA_100_nt_upstream	INT_0_7415	INT_0_7415	sense	602224	602250	26	17	5	18	9	15
chrXIV	662511	662509	+	XUTs	XUT_14F-269	572865	sense	662495	662531	36	49	13	7	7	48
chrXIV	695460	695460	+	intergenic_region	INT_0_7487	INT_0_7487	sense	695458	695465	7	15	6	1	3	14
chrXIV	716308	716306	+	snoRNA_300_nt_downstream	INT_0_7504	INT_0_7504	sense	716290	716338	48	5390	527	12	14	384.929
chrXIV	716408	716449	+	snoRNA_300_nt_downstream	INT_0_7504	INT_0_7504	sense	716365	716654	289	2725	253	127	97	12
chrXIV	716693	716693	+	CUTs	CUT350	ST2954	sense	716685	716694	9	8	5	7	4	8
chrX	74279	74304	+	CDS	RPS14B	YJL191W	sense	74174	74399	225	669	34	103	86	333.5
chrX	74457	74466.7	+	CDS	RPS14B	YJL191W	sense	74455	74592	137	112	8	77	41	111
chrX	96965	96975	+	intergenic_region	XUT_10F-42	572383	sense	96890	97015	125	122	8	73	46	4.84
chrX	122041	122041	+	intergenic_region	INT_0_4552	INT_0_4552	sense	122041	122049	8	12	5	4	3	11
chrX	142863	142863	+	XUTs	XUT_10F-68	572393	sense	142862	142866	4	9	4	2	3	3
chrX	174011	174052	+	antisense_CDS	INT_0_4599	INT_0_4599	sense	173988	174110	122	47	4	94	25	46
chrX	180933	180940	+	CUTs	XUT_10F-86	572398	sense	180849	180979	130	82	5	87	38	3.85714
chrX	182347	182342	+	CUTs	XUT_10F-87	572399	sense	182311	182365	54	43	11	24	9	5.25
chrX	187055	187055	+	CUTs	CUT207	ST1750	sense	187055	187276	221	73	8	188	48	36
chrX	197226	197222	+	3UTR	ASF1	YJL115W	sense	197222	197226	4	9	5	3	2	2
chrX	234126	234125	+	intergenic_region	INT_0_4640	INT_0_4640	sense	234106	234132	26	45	11	17	12	44
chrX	291116	291116	+	intergenic_region	SUT209	ST1778	sense	291116	291123	7	10	4	6	4	2.66667
chrX	295084	295083	+	3UTR	YJL077W-A	YJL077W-A	sense	295083	295086	3	30	9	1	3	2.3
chrX	317108	317108	+	3UTR	RRG10	YJL062W-A	sense	317105	317112	7	11	5	3	4	3.33333
chrX	350032	350032	+	antisense_CDS	CUT211	ST1797	sense	349997	350037	40	10	4	24	6	4.5
chrX	398969	398969	+	CUTs	CUT212	ST1812	sense	398967	399021	54	15	4	50	8	3.5
chrX	413954	413954	+	CUTs	CUT213	ST1815	sense	413913	413989	76	23	4	29	12	22
chrX	414024	414032	+	CUTs	CUT213	ST1815	sense	414011	414053	42	31	4	26	17	30
chrX	414202	414202	+	intergenic_region	INT_0_4771	INT_0_4771	sense	414157	414249	92	18	5	50	10	4.25
chrX	422966	422966	+	tRNA	EMT3	tM(CAU)J2	sense	422958	422975	17	10	4	12	6	9
chrX	423151	423162	+	antisense_CDS	INT_0_4780	INT_0_4780	sense	423143	423179	36	213	29	18	19	3.02857
chrX	432475	432475	+	intergenic_region	INT_0_4784	INT_0_4784	sense	432441	432477	36	16	7	17	5	7
chrX	436279	436279	+	intergenic_region	INT_0_4791	INT_0_4791	sense	436258	436280	22	7	4	20	3	7
chrX	445617	445615	+	intergenic_region	INT_0_4793	INT_0_4793	sense	445594	445654	60	43	9	44	21	42
chrX	456130	456130	+	intergenic_region	INT_0_4805	INT_0_4805	sense	456130	456184	54	36	7	45	19	3.88889
chrX	456258	456250	+	CDS	MET3	YJR010W	sense	456221	456342	121	72	5	89	36	3.22727
chrX	458783	458771	+	CUTs	CUT214	ST1830	sense	458620	458906	286	166	6	179	67	9.70588
chrX	464383	464382	+	3UTR	YJR015W	YJR015W	sense	464382	464383	1	14	10	0	2	4
chrX	466909	466942	+	CDS	YJR018W	YJR018W	sense	466784	467171	387	260	9	228	109	259
chrX	467210	467212	+	3UTR	YJR018W	YJR018W	sense	467206	467214	8	51	18	2	4	3.125
chrX	467265	467284	+	3UTR	YJR018W	YJR018W	sense	467218	467365	147	64	8	113	30	21
chrX	516424	516424	+	3UTR	NUP85	YJR042W	sense	516424	516435	11	7	4	5	3	2
chrX	526205	526205	+	SUTs	SUT215	ST1845	sense	526204	526207	3	13	7	1	3	12
chrX	526373	526384	+	CDS	CYC1	YJR048W	sense	526345	526494	149	232	19	52	38	57.75
chrX	585910	585911	+	CUTs	CUT217	ST1866	sense	585894	585922	28	57	13	5	7	9.33333
chrX	609551	609551	+	intergenic_region	SUT216	ST1871	sense	609547	609575	28	44	13	9	11	14.3333
chrX	613584	613584	+	CUTs	CUT219	ST1875	sense	613533	613663	130	67	6	93	35	33
chrX	617848	617849	+	tRNA_100_nt_upstream	INT_0_4922	INT_0_4922	sense	617829	617856	27	20	5	8	7	19
chrX	620787	620791	+	CDS	URA8	YJR103W	sense	620756	620844	88	187	15	46	39	93
chrX	620879	620891	+	CDS	URA8	YJR103W	sense	620868	620949	81	61	7	61	25	60
chrX	633021	633021	+	intergenic_region	INT_0_4937	INT_0_4937	sense	633006	633023	17	13	5	9	6	12
chrX	637735	637735	+	3UTR	INT_0_4941	INT_0_4941	sense	637735	637736	1	4	4	-1	1	4
chrX	640860	640860	+	CDS	YJR116W	YJR116W	sense	640820	640873	53	16	4	32	9	15
chrX	640960	640960	+	CDS	YJR116W	YJR116W	sense	640937	640967	30	13	4	9	7	12
chrX	664026	664024	+	snoRNA_300_nt_downstream	INT_0_4967	INT_0_4967	sense	663960	664032	72	203	117	15	11	28.8571
chrX	664090	664171	+	snoRNA_300_nt_downstream	CUT221	ST1893	sense	664055	664378	323	473	16	217	141	157.333
chrX	664693	664711	+	CUTs	CUT221	ST1893	sense	664403	664999	596	1060	29	245	185	352
chrX	666851	666851	+	antisense_CDS	INT_0_4970	INT_0_4970	sense	666851	666852	1	4	4	-1	1	4
chrXVI	30427	30427	+	3UTR	ATP15	YPL271W	sense	30427	30429	2	8	7	-1	1	3.5
chrXVI	75447	75446	+	SUTs	XUT_16F-27	573092	sense	75411	75486	75	47	11	17	11	46
chrXVI	79675	79673.8	+	SUTs	XUT_16F-30	573094	sense	79655	79700	45	99	33	7	7	7
chrXVI	95719	95719	+	SUTs	XUT_16F-35	573096	sense	95687	95729	42	13	6	28	5	11
chrXVI	100246	100246	+	3UTR	YAR1	YPL239W	sense	100246	100247	1	5	4	0	2	4
chrXVI	108220	108220	+	3UTR	SSO1	YPL232W	sense	108220	108221	1	12	6	0	2	6
chrXVI	121550	121547	+	intergenic_region	INT_0_8482	INT_0_8482	sense	121542	121552	10	34	10	6	6	30
chrXVI	139628	139625	+	antisense_CDS	INT_0_8499	INT_0_8499	sense	139624	139628	4	32	25	0	2	2.33333
chrXVI	143804	143804	+	5UTR	XUT_16R-66	573167	antisense	143780	143811	31	17	4	21	9	16
chrXVI	173547	173547	+	snoRNA_300_nt_upstream	YPL198W_intron	intergenic	sense	173535	173554	19	16	4	9	7	15
chrXVI	173925	173925	+	snoRNA_300_nt_upstream	RPL7B	YPL198W	sense	173593	174097	504	14381	5854	2	4	312.609
chrXVI	181215	181215	+	3UTR	DDC1	YPL194W	sense	181215	181219	4	5	4	3	2	4
chrXVI	194263	194270	+	3UTR	MF(ALPHA)1	YPL187W	sense	194239	194294	55	151	51	23	17	149
chrXVI	194371	194369	+	3UTR	MF(ALPHA)1	YPL187W	sense	194354	194388	34	218	55	11	13	217
chrXVI	218659	218659	+	intron	YPL175W_intron	intergenic	sense	218656	218704	48	14	5	31	6	13
chrXVI	220205	220204	+	3UTR	SPT14	YPL175W	sense	220204	220205	1	16	12	0	2	4
chrXVI	244066	244066	+	SUTs	XUT_16F-95	573104	sense	244066	244068	2	7	4	0	2	2
chrXVI	252824	252824	+	antisense_CDS	CUT411	ST3402	sense	252819	252831	12	9	4	7	4	7
chrXVI	256889	256889	+	intergenic_region	INT_0_8588	INT_0_8588	sense	256887	256896	9	6	4	6	2	2.5
chrXVI	326395	326395	+	intergenic_region	INT_0_8635	INT_0_8635	sense	326362	326396	34	10	4	17	6	10
chrXVI	337471	337472	+	3UTR	YPL114W	YPL114W	sense	337446	337481	35	135	47	21	14	4.1875
chrXVI	352849	352936	+	CUTs	XUT_16F-145	573113	sense	352849	353008	159	80	5	103	36	3.59091
chrXVI	369620	369620	+	SUTs	XUT_16F-151	573115	sense	369620	369621	1	5	4	0	2	4
chrXVI	383068	383068	+	3UTR	YPL088W	YPL088W	sense	383068	383069	1	7	4	0	2	4
chrXVI	405449	405507	+	CDS	RPS9A	YPL081W	sense	405437	405523	86	65	6	66	26	4.57143
chrXVI	405630	405633	+	CDS	RPS9A	YPL081W	sense	405570	405648	78	40	6	56	19	39
chrXVI	405692	405692	+	CDS	RPS9A	YPL081W	sense	405676	405777	101	66	5	64	33	21.6667
chrXVI	405813	405813	+	CDS	RPS9A	YPL081W	sense	405798	405832	34	28	6	18	11	27
chrXVI	426094	426094	+	5UTR	INT_0_8706	INT_0_8706	sense	426083	426228	145	53	5	121	28	50
chrXVI	443365	443365	+	XUTs	XUT_16F-175	573117	sense	443365	443369	4	8	4	0	2	7
chrXVI	454449	454449	+	CUTs	CUT420	ST3469	sense	454384	454601	217	72	4	158	43	71
chrXVI	454772	454772	+	antisense_CDS	INT_0_8733	INT_0_8733	sense	454741	454887	146	27	4	87	16	26
chrXVI	457015	457016	+	intergenic_region	INT_0_8737	INT_0_8737	sense	457014	457017	3	13	7	0	2	4.33333
chrXVI	517684	517747	+	CDS	CTF19	YPL018W	sense	517613	517859	246	100	8	127	44	12.375
chrXVI	569214	569212	+	intergenic_region	INT_0_8825	INT_0_8825	sense	569187	569220	33	64	13	5	7	7
chrXVI	572455	572455	+	intergenic_region	INT_0_8827	INT_0_8827	sense	572437	572463	26	17	4	14	8	16
chrXVI	581996	581996	+	tRNA_100_nt_upstream	XUT_16F-233	573133	sense	581970	582002	32	22	7	6	7	21
chrXVI	608834	608827	+	XUTs	XUT_16F-243	573136	sense	608810	608835	25	14	5	17	5	4.33333
chrXVI	613386	613387	+	antisense_CDS	INT_0_8855	INT_0_8855	sense	613368	613397	29	28	8	14	10	2.25
chrXVI	642127	642092	+	5UTR	GLN1	YPR035W	sense	642055	642135	80	58	8	57	25	28.5
chrXVI	676164	676164	+	CUTs	CUT428	ST3544	sense	676035	676177	142	42	4	104	25	41
chrXVI	689797	689789	+	intergenic_region	INT_0_8920	INT_0_8920	sense	689755	689806	51	41	6	35	15	20
chrXVI	698358	698343	+	3UTR	YPR076W	YPR076W	sense	698320	698371	51	163	15	30	22	2.875
chrXVI	773775	773775	+	intergenic_region	INT_0_8984	INT_0_8984	sense	773774	773780	6	21	16	0	2	19
chrXVI	810608	810608	+	tRNA_100_nt_upstream	INT_0_9016	INT_0_9016	sense	810584	810616	32	19	9	13	6	17
chrXVI	819374	819374	+	intergenic_region	INT_0_9026	INT_0_9026	sense	819373	819399	26	10	4	19	4	4.5
chrXVI	821923	821903	+	snoRNA	SNR45	snR45	sense	821819	821941	122	212	53	77	23	211
chrXVI	822079	822115	+	snoRNA_300_nt_downstream	INT_0_9029	INT_0_9029	sense	821962	822288	326	4381	249	109	99	145.967
chrXVI	876938	876936	+	CUTs	CUT434	ST3608	sense	876932	876972	40	32	6	33	17	3.875
chrXVI	877319	877319	+	XUTs	CUT434	ST3608	sense	877192	877385	193	45	4	142	29	44
chrXVI	892083	892083	+	intergenic_region	INT_0_9083	INT_0_9083	sense	892083	892085	2	8	5	1	3	3
chrXVI	906745	906745	+	3UTR	INT_0_9094	INT_0_9094	sense	906745	906746	1	4	4	-1	1	4
chrXVI	933208	933208	+	3UTR	YPR196W	YPR196W	sense	933205	933209	4	5	4	2	2	5
chrV	45521	45521	+	CUTs	CUT105	ST0815	sense	45470	45569	99	30	4	67	18	29
chrV	45800	45802	+	CUTs	CUT105	ST0815	sense	45793	45804	11	28	11	1	3	4.5
chrV	54062	54062	+	antisense_CDS	INT_0_2570	INT_0_2570	sense	54045	54206	161	43	4	122	27	42
chrV	61171	61172.3	+	snoRNA_300_nt_upstream	INT_0_2575	INT_0_2575	sense	61133	61216	83	1125	386	4	6	59.1053
chrV	61441	61454.2	+	snoRNA	SNR67	snR67	sense	61429	61532	103	294	48	92	41	293
chrV	61602	61601.8	+	snoRNA_300_nt_downstream	INT_0_2577	INT_0_2577	sense	61553	61608	55	996	258	4	6	993
chrV	61850	61841.4	+	snoRNA	SNR53	snR53	sense	61786	61902	116	1189	82	51	48	396
chrV	62167	62167	+	intergenic_region	INT_0_2578	INT_0_2578	sense	62099	62183	84	25	5	48	11	24
chrV	70317	70317	+	3UTR	IES6	YEL044W	sense	70316	70318	2	6	5	-1	1	6
chrV	85258	85256.8	+	antisense_CDS	INT_0_2593	INT_0_2593	sense	85221	85299	78	69	24	20	12	68
chrV	100064	100064	+	tRNA_100_nt_upstream	INT_0_2606	INT_0_2606	sense	100062	100066	4	10	7	2	3	9
chrV	117682	117682	+	intergenic_region	INT_0_2617	INT_0_2617	sense	117682	117683	1	6	6	-1	1	6
chrV	124760	124759	+	3UTR	GTT3	YEL017W	sense	124756	124760	4	27	21	0	2	6
chrV	131511	131511	+	intergenic_region	INT_0_2630	INT_0_2630	sense	131506	131515	9	11	5	6	4	10
chrV	138692	138692	+	tRNA	tR(UCU)E	tR(UCU)E	sense	138681	138694	13	12	4	11	6	10
chrV	153664	153610	+	CDS	MNN1	YER001W	sense	153564	153748	184	96	5	138	44	95
chrV	214096	214096	+	3UTR	INT_0_2707	INT_0_2707	sense	214096	214098	2	7	5	0	2	2
chrV	238967	238980	+	CUTs	CUT109	ST0883	sense	238911	239184	273	104	8	203	58	51.5
chrV	250221	250221	+	tRNA_100_nt_upstream	INT_0_2733	INT_0_2733	sense	250207	250225	18	46	13	6	6	44
chrV	269423	269422	+	SUTs	XUT_5F-128	571968	sense	269421	269423	2	24	15	0	2	9
chrV	269486	269485	+	antisense_CDS	INT_0_2751	INT_0_2751	sense	269443	269510	67	53	9	46	19	4.72727
chrV	285241	285210	+	SUTs	XUT_5F-139	571971	sense	285185	285241	56	35	7	53	12	2.33333
chrV	302584	302584	+	intergenic_region	INT_0_2783	INT_0_2783	sense	302581	302599	18	14	5	14	5	12
chrV	317106	317106	+	5UTR	CUT111	ST0906	sense	316897	317108	211	86	5	184	55	28
chrV	322755	322773	+	ncRNA	SRG1	SRG1	sense	322714	322826	112	123	8	76	42	17.2857
chrV	332538	332538	+	intergenic_region	INT_0_2814	INT_0_2814	sense	332519	332545	26	8	4	14	4	7
chrV	351401	351401	+	3UTR	RAD51	YER095W	sense	351401	351408	7	6	4	3	2	2.5
chrV	395522	395522	+	CUTs	CUT115	ST0927	sense	395433	395533	100	26	6	42	14	25
chrV	425026	424989	+	snoRNA	SNR4	snR4	sense	424794	425056	262	709	81	134	71	118
chrV	425129	425165	+	snoRNA_300_nt_downstream	INT_0_2879	INT_0_2879	sense	425077	425534	457	4689	557	131	113	9.12062
chrV	425604	425606	+	antisense_CDS	INT_0_2880	INT_0_2880	sense	425568	425797	229	60	4	162	32	58
chrV	439278	439278	+	intergenic_region	INT_0_2894	INT_0_2894	sense	439252	439294	42	16	5	15	8	15
chrV	442036	442036	+	ncRNA	SCR1	SCR1	sense	442022	442068	46	19	4	33	8	18
chrV	442145	442126	+	ncRNA	SCR1	SCR1	sense	442089	442172	83	113	10	68	35	112
chrV	442335	442354	+	ncRNA	SCR1	SCR1	sense	442202	442512	310	1650	76	230	169	149.909
chrV	484643	484643	+	intergenic_region	INT_0_2930	INT_0_2930	sense	484614	484787	173	93	15	104	32	8.36364
chrV	501328	501328	+	CUTs	CUT119	ST0953	sense	501315	501371	56	20	4	47	10	4.75
chrV	504834	504834	+	SUTs	XUT_5F-239	571989	sense	504795	504855	60	31	11	31	12	30
chrV	510287	510290	+	5UTR	PAB1	YER165W	sense	510253	510314	61	94	13	23	23	46.5
chrV	563300	563299	+	SUTs	SUT100	ST0970	sense	563189	563300	111	25	5	50	12	5
chrXV	18673	18670	+	XUTs	XUT_15F-9	572945	sense	18616	18673	57	25	9	13	6	5.33333
chrXV	18689	18703	+	intergenic_region	XUT_15F-9	572945	sense	18681	18704	23	42	10	13	11	4.1
chrXV	19166	19166	+	intergenic_region	INT_0_7576	INT_0_7576	sense	19154	19167	13	9	5	1	3	7
chrXV	22338	22313.1	+	CUTs	XUT_15F-10	572946	sense	22272	22442	170	106	5	138	52	8.75
chrXV	31447	31442.7	+	antisense_CDS	INT_0_7583	INT_0_7583	sense	31423	31454	31	50	11	23	14	48
chrXV	33542	33543.5	+	XUTs	XUT_15F-18	572948	sense	33529	33588	59	73	16	43	17	3.6
chrXV	33837	33672.4	+	SUTs	XUT_15F-18	572948	sense	33652	33840	188	126	13	166	43	3.57143
chrXV	81409	81419	+	intergenic_region	INT_0_7623	INT_0_7623	sense	81406	81447	41	22	4	37	9	6.33333
chrXV	88090	88090	+	CDS	HRP1	YOL123W	sense	88086	88107	21	15	5	17	7	13
chrXV	88180	88180	+	CDS	HRP1	YOL123W	sense	88150	88250	100	24	4	69	14	23
chrXV	108262	108262	+	3UTR	MSB4	YOL112W	sense	108261	108263	2	11	5	0	2	7
chrXV	110162	110162	+	intergenic_region	INT_0_7650	INT_0_7650	sense	110158	110174	16	9	4	11	4	2.66667
chrXV	136652	136652	+	3UTR	CUT357	ST3012	sense	136613	136673	60	22	4	23	12	21
chrXV	162280	162280	+	3UTR	YOL085W-A	YOL085W-A	sense	162276	162311	35	21	5	25	8	3.33333
chrXV	168500	168498	+	5UTR	ATG19	YOL082W	sense	168444	168588	144	63	10	96	24	62
chrXV	180586	180586	+	antisense_CDS	INT_0_7698	INT_0_7698	sense	180568	180588	20	19	9	11	6	5.66667
chrXV	189628	189628	+	3UTR	MDM20	YOL076W	sense	189628	189629	1	4	4	-1	1	4
chrXV	193850	193850	+	antisense_CDS	INT_0_7705	INT_0_7705	sense	193840	193859	19	19	5	12	8	9
chrXV	234294	234293	+	snoRNA_300_nt_upstream	INT_0_7738	INT_0_7738	sense	234276	234308	32	323	135	2	4	322
chrXV	234555	234559	+	snoRNA	SNR81	snR81	sense	234541	234907	366	8333	4192	5	7	189.364
chrXV	241646	241646	+	SUTs	XUT_15F-112	572961	sense	241645	241730	85	32	4	70	19	15.5
chrXV	259358	259358	+	snoRNA_300_nt_upstream	INT_0_7762	INT_0_7762	sense	259358	259359	1	4	4	-1	1	4
chrXV	259411	259410	+	snoRNA_300_nt_upstream	INT_0_7762	INT_0_7762	sense	259402	259416	14	55	20	4	6	54
chrXV	259444	259443	+	snoRNA_300_nt_upstream	INT_0_7762	INT_0_7762	sense	259441	259449	8	24	9	3	4	23
chrXV	259577	259675	+	snoRNA	SNR50	snR50	sense	259569	259979	410	2759	399	234	138	68.95
chrXV	274899	274903	+	5UTR	INT_0_7773	INT_0_7773	sense	274877	274992	115	87	8	71	32	86
chrXV	282094	282096	+	tRNA_100_nt_upstream	XUT_15F-129	572963	sense	282092	282100	8	13	6	4	2	12
chrXV	345946	345946	+	3UTR	INT_0_7827	INT_0_7827	sense	345939	345952	13	26	7	8	7	3.57143
chrXV	349068	349068	+	intergenic_region	SUT361	ST3088	sense	349068	349081	13	6	4	0	2	2.5
chrXV	414477	414477	+	antisense_CDS	INT_0_7892	INT_0_7892	sense	414477	414478	1	7	4	0	2	4
chrXV	426705	426708	+	intergenic_region	INT_0_7901	INT_0_7901	sense	426692	426768	76	21	4	45	11	20
chrXV	427833	427833	+	CDS	YOR053W	YOR053W	sense	427824	427835	11	8	4	6	3	3.5
chrXV	427876	427876	+	CDS	YOR053W	YOR053W	sense	427876	427954	78	40	4	63	26	19.5
chrXV	458665	458665	+	XUTs	XUT_15F-217	572976	sense	458542	458699	157	46	4	113	26	15
chrXV	463080	463092	+	CUTs	CUT379	ST3133	sense	463066	463147	81	44	4	34	18	43
chrXV	469274	469274	+	3UTR	UFE1	YOR075W	sense	469274	469283	9	5	4	8	2	4
chrXV	495026	495014	+	5UTR	ECM3	YOR092W	sense	494967	495064	97	92	9	56	29	29.6667
chrXV	515288	515292	+	CDS	RAS1	YOR101W	sense	515283	515329	46	72	7	29	20	71
chrXV	578574	578574	+	CDS	BAG7	YOR134W	sense	578574	578587	13	7	4	0	2	3
chrXV	578641	578641	+	CDS	BAG7	YOR134W	sense	578589	578709	120	50	4	69	25	49
chrXV	580301	580309	+	CDS	IDH2	YOR136W	sense	580257	580369	112	51	5	57	23	25
chrXV	581596	581596	+	3UTR	IDH2	YOR136W	sense	581596	581597	1	6	6	-1	1	6
chrXV	611849	611849	+	intergenic_region	INT_0_8041	INT_0_8041	sense	611840	611883	43	19	5	18	8	18
chrXV	624473	624460	+	3UTR	PDR5	YOR153W	sense	624459	624473	14	49	17	12	9	2.66667
chrXV	683714	683714	+	3UTR	INT_0_8102	INT_0_8102	sense	683714	683744	30	15	4	8	6	2.33333
chrXV	710133	710133	+	tRNA_100_nt_upstream	INT_0_8111	INT_0_8111	sense	710118	710134	16	14	4	12	7	13
chrXV	736308	736308	+	3UTR	PTP2	YOR208W	sense	736308	736309	1	7	4	0	2	4
chrXV	762875	762875	+	CDS	HER1	YOR227W	sense	762822	762883	61	21	4	54	13	20
chrXV	780376	780393	+	snoRNA	SNR17A	snR17a	sense	780362	780427	65	55	9	50	19	54
chrXV	780590	780588	+	snoRNA	SNR17A	snR17a	sense	780475	780625	150	192	19	74	36	63.6667
chrXV	798542	798542	+	3UTR	INT_0_8176	INT_0_8176	sense	798542	798549	7	9	4	5	4	8
chrXV	798619	798617	+	intergenic_region	INT_0_8176	INT_0_8176	sense	798617	798621	4	10	5	1	2	4.5
chrXV	802550	802550	+	SUTs	SUT378	ST3236	sense	802534	802552	18	10	5	16	4	3
chrXV	815898	815898	+	3UTR	GCD1	YOR260W	sense	815898	815903	5	11	4	4	5	3.5
chrXV	822369	822369	+	3UTR	PNT1	YOR266W	sense	822369	822370	1	5	4	0	2	4
chrXV	832611	832605	+	snoRNA	SNR8	snR8	sense	832417	832655	238	3991	641	12	12	181.364
chrXV	832719	832721	+	snoRNA_300_nt_downstream	INT_0_8205	INT_0_8205	sense	832677	832822	145	617	56	82	64	615
chrXV	842622	842726	+	snoRNA_300_nt_downstream	INT_0_8213	INT_0_8213	sense	842590	842946	356	6193	423	186	145	62.5455
chrXV	930738	930907	+	antisense_CDS	INT_0_8279	INT_0_8279	sense	930684	930955	271	131	6	177	66	5.2
chrXV	980615	980615	+	tRNA_100_nt_upstream	INT_0_8311	INT_0_8311	sense	980609	980617	8	31	8	2	4	26
chrXV	1004167	1004167	+	SUTs	SUT388	ST3302	sense	1004131	1004177	46	14	5	25	7	13
chrXV	1025643	1025643	+	3UTR	YOR366W	YOR366W	sense	1025643	1025645	2	9	5	0	2	2.66667
chrXV	1025652	1025652	+	3UTR	YOR366W	YOR366W	sense	1025647	1025654	7	13	4	5	5	3.66667
chrXV	1034545	1034545	+	intergenic_region	INT_0_8353	INT_0_8353	sense	1034534	1034555	21	21	4	10	7	6.66667
chrXV	1059581	1059581	+	CDS	FIT2	YOR382W	sense	1059580	1059582	2	7	4	1	3	7
chrIII	39387	39388.6	+	CUTs	CUT040	ST0280	sense	39377	39469	92	57	7	52	21	14
chrIII	39523	39524	+	intergenic_region	INT_0_832	INT_0_832	sense	39503	39525	22	12	5	1	3	12
chrIII	41394	41394	+	intergenic_region	INT_0_834	INT_0_834	sense	41347	41434	87	62	8	29	19	6.77778
chrIII	46995	46995	+	3UTR	MGR1	YCL044C	antisense	46995	46996	1	14	14	-1	1	14
chrIII	62838	62838	+	3UTR	LSB5	YCL034W	sense	62838	62841	3	7	4	2	3	5
chrIII	132118	132151	+	CUTs	CUT044	ST0307	sense	132102	132188	86	50	6	61	23	49
chrIII	157345	157345	+	intergenic_region	INT_0_936	INT_0_936	sense	157345	157360	15	6	4	6	2	2.5
chrIII	164308	164309	+	CUTs	CUT047	ST0315	sense	164236	164317	81	60	19	43	16	59
chrIII	169164	169164	+	XUTs	XUT_3F-78	571711	sense	169075	169165	90	46	5	86	29	7.66667
chrIII	177307	177324	+	snoRNA	SNR65	snR65	sense	177278	177575	297	2760	588	136	97	162.294
chrIII	179283	179285	+	CUTs	CUT048	ST0318	sense	179281	179293	12	38	8	6	7	37
chrIII	197767	197769	+	antisense_CDS	INT_0_966	INT_0_966	sense	197604	197923	319	108	5	217	67	35.6667
chrIII	201187	201186	+	CDS	YCR041W	YCR041W	sense	201180	201187	7	13	8	5	5	4.33333
chrVII	74573	74574	+	SUTs	SUT111	ST1062	sense	74549	74606	57	18	4	25	8	3.4
chrVII	115416	115334	+	intergenic_region	INT_0_3273	INT_0_3273	sense	115283	115424	141	98	6	124	41	12.125
chrVII	131312	131312	+	3UTR	DSD1	YGL196W	sense	131311	131313	2	5	4	0	2	5
chrVII	141424	141424	+	antisense_CDS	INT_0_3288	INT_0_3288	sense	141424	141425	1	5	4	0	2	4
chrVII	166938	166963	+	5UTR	CUT130	ST1087	sense	166936	167013	77	39	6	72	20	12.6667
chrVII	205576	205576	+	tRNA_100_nt_upstream	tL%28CAA%29G1_intron	intergenic	sense	205559	205586	27	20	5	19	10	18
chrVII	226235	226261	+	CUTs	CUT132	ST1106	sense	226159	226331	172	96	4	118	51	95
chrVII	281285	281275	+	CUTs	XUT_7F-133	572085	sense	281229	281345	116	71	12	78	27	8.75
chrVII	284271	284271	+	intergenic_region	INT_0_3390	INT_0_3390	sense	284256	284274	18	29	11	6	6	28
chrVII	287010	287010	+	intergenic_region	CUT136	ST1123	sense	286996	287050	54	18	5	24	8	4.25
chrVII	304033	304029	+	antisense_CDS	INT_0_3406	INT_0_3406	sense	304001	304071	70	43	5	33	17	42
chrVII	317228	317192	+	snoRNA_300_nt_downstream	USE1	YGL098W	sense	317055	317495	440	2774	221	118	102	34.6625
chrVII	320451	320451	+	SUTs	SUT114	ST1139	sense	320451	320452	1	4	4	-1	1	4
chrVII	346250	346387	+	snoRNA	SNR10	snR10	sense	346202	346805	603	9875	519	268	214	98.74
chrVII	392027	392027	+	3UTR	YBP2	YGL060W	sense	392027	392028	1	6	4	0	2	4
chrVII	396039	396039	+	antisense_CDS	INT_0_3479	INT_0_3479	sense	396039	396041	2	6	4	0	2	5
chrVII	405412	405412	+	tRNA_100_nt_upstream	INT_0_3489	INT_0_3489	sense	405409	405415	6	10	8	2	2	9
chrVII	427513	427513	+	CUTs	CUT143	ST1181	sense	427474	427565	91	32	4	66	20	31
chrVII	428127	428127	+	intergenic_region	INT_0_3514	INT_0_3514	sense	428126	428129	3	7	4	0	2	6
chrVII	461419	461419	+	3UTR	ATE1	YGL017W	sense	461419	461420	1	4	4	-1	1	4
chrVII	465051	465051	+	3UTR	KAP122	YGL016W	sense	465049	465057	8	9	4	5	4	3.5
chrVII	485068	485068	+	intergenic_region	INT_0_3553	INT_0_3553	sense	484903	485105	202	56	4	131	34	54
chrVII	521053	521054	+	intergenic_region	INT_0_3578	INT_0_3578	sense	521048	521055	7	18	7	4	5	4.5
chrVII	545233	545235	+	snoRNA_300_nt_upstream	CUT146	ST1216	sense	545224	545276	52	695	238	8	6	173.5
chrVII	545588	545619	+	snoRNA_300_nt_downstream	INT_0_3603	INT_0_3603	sense	545576	546087	511	5453	1066	197	144	160.353
chrVII	559454	559454	+	CUTs	XUT_7F-261	572097	sense	559454	559455	1	8	6	0	2	6
chrVII	559677	559677	+	intergenic_region	INT_0_3614	INT_0_3614	sense	559677	559778	101	34	5	81	19	4.125
chrVII	567963	568147	+	intergenic_region	INT_0_3617	INT_0_3617	sense	567946	568159	213	106	5	180	60	2.1875
chrVII	568197	568203	+	intergenic_region	INT_0_3617	INT_0_3617	sense	568187	568227	40	23	4	20	10	2.44444
chrVII	582944	582944	+	intergenic_region	INT_0_3628	INT_0_3628	sense	582937	582946	9	10	4	4	4	8
chrVII	605962	606002	+	CUTs	XUT_7F-276	572100	sense	605939	606017	78	48	5	51	24	2.9375
chrVII	606102	606104	+	5UTR	CUT149	ST1236	sense	606045	606222	177	127	12	84	44	42
chrVII	609465	609467	+	snoRNA_300_nt_upstream	INT_0_3647	INT_0_3647	sense	609456	609508	52	75	19	42	15	73
chrVII	609611	609611	+	snoRNA	SNR48	snR48	sense	609611	609625	14	11	4	10	5	10
chrVII	609696	609697	+	snoRNA	SNR48	snR48	sense	609690	609714	24	1048	439	2	4	346
chrVII	609851	609875	+	snoRNA_300_nt_downstream	INT_0_3649	INT_0_3649	sense	609757	610097	340	1750	112	213	145	218.625
chrVII	640968	640968	+	CDS	YGR079W	YGR079W	sense	640966	640971	5	8	4	3	3	7
chrVII	700607	700607	+	tRNA_100_nt_upstream	CUT153	ST1268	sense	700597	700613	16	30	10	9	7	29
chrVII	703531	703531	+	3UTR	YGR107W	YGR107W	sense	703457	703576	119	55	4	73	27	54
chrVII	733768	733749	+	intergenic_region	INT_0_3747	INT_0_3747	sense	733723	733903	180	88	6	106	45	87
chrVII	735924	735924	+	intergenic_region	INT_0_3748	INT_0_3748	sense	735920	735931	11	18	5	8	7	17
chrVII	739695	739694	+	CUTs	CUT155	ST1284	sense	739686	739703	17	50	11	8	9	49
chrVII	739990	739978	+	CDS	ASN2	YGR124W	sense	739946	740049	103	56	8	40	16	55
chrVII	741785	741784	+	3UTR	ASN2	YGR124W	sense	741784	741785	1	11	7	0	2	4
chrVII	761325	761324	+	5UTR	INT_0_3772	INT_0_3772	sense	761317	761329	12	16	9	0	2	2.5
chrVII	763746	763746	+	intergenic_region	INT_0_3776	INT_0_3776	sense	763746	763747	1	5	5	-1	1	5
chrVII	767161	767190	+	intergenic_region	INT_0_3779	INT_0_3779	sense	767120	767377	257	97	4	176	53	96
chrVII	794351	794353	+	tRNA_100_nt_upstream	INT_0_3801	INT_0_3801	sense	794344	794354	10	20	6	5	6	9.5
chrVII	845247	845247	+	intergenic_region	INT_0_3840	INT_0_3840	sense	845247	845290	43	11	5	30	5	2.5
chrVII	879824	879830	+	intergenic_region	INT_0_3864	INT_0_3864	sense	879745	879904	159	88	7	95	40	87
chrVII	884702	884707	+	CUTs	CUT160	ST1331	sense	884660	884818	158	103	6	76	39	102
chrVII	888640	888640	+	intergenic_region	INT_0_3874	INT_0_3874	sense	888635	888641	6	7	4	4	3	6
chrVII	903437	903437	+	SUTs	XUT_7F-414	572125	sense	903390	903438	48	16	4	22	6	4
chrVII	962711	962711	+	CUTs	CUT163	ST1356	sense	962562	962743	181	69	4	128	36	68
chrVII	995421	995421	+	CUTs	CUT165	ST1366	sense	995421	995422	1	5	4	0	2	4
chrVII	1000949	1000949	+	CDS	ENO1	YGR254W	sense	1000947	1000967	20	14	4	12	8	13
chrVII	1001032	1001032	+	CDS	ENO1	YGR254W	sense	1001032	1001067	35	36	4	33	21	32
chrXI	26401	26401	+	3UTR	URA1	YKL216W	sense	26401	26402	1	8	4	0	2	4
chrXI	36654	36653	+	3UTR	TRP3	YKL211C	antisense	36653	36654	1	30	25	-1	1	5
chrXI	38708	38705.5	+	snoRNA_300_nt_upstream	INT_0_5039	INT_0_5039	sense	38683	38714	31	107	30	12	8	106
chrXI	38935	38989.5	+	snoRNA	SNR64	snR64	sense	38885	39382	497	5536	708	196	116	553.5
chrXI	49003	49003	+	3UTR	AIM27	YKL207W	sense	49003	49004	1	6	4	0	2	4
chrXI	71028	71028	+	antisense_CDS	INT_0_5057	INT_0_5057	sense	70956	71032	76	24	7	70	10	23
chrXI	144403	144403	+	CDS	PIR3	YKL163W	sense	144403	144407	4	8	4	3	3	6
chrXI	144428	144427	+	CDS	PIR3	YKL163W	sense	144416	144429	13	24	13	1	3	3
chrXI	144431	144433	+	CDS	PIR3	YKL163W	sense	144430	144434	4	19	6	3	5	3.75
chrXI	144435	144457	+	CDS	PIR3	YKL163W	sense	144435	144475	40	23	5	21	11	2.44444
chrXI	146887	146887	+	intergenic_region	INT_0_5109	INT_0_5109	sense	146884	146906	22	29	11	17	8	2.77778
chrXI	165412	165328	+	antisense_CDS	INT_0_5124	INT_0_5124	sense	165153	165489	336	236	7	224	106	78.3333
chrXI	166058	166031	+	intergenic_region	INT_0_5124	INT_0_5124	sense	166027	166068	41	210	45	24	23	4.40426
chrXI	166127	166131	+	intergenic_region	INT_0_5124	INT_0_5124	sense	166111	166165	54	90	23	22	11	14.8333
chrXI	219827	219827	+	tRNA_100_nt_upstream	INT_0_5168	INT_0_5168	sense	219825	219832	7	14	8	4	4	13
chrXI	224749	224765	+	CUTs	CUT228	ST1976	sense	224741	224766	25	32	6	20	12	4
chrXI	226151	226151	+	intergenic_region	INT_0_5173	INT_0_5173	sense	226136	226169	33	14	4	22	8	4.33333
chrXI	230700	230800	+	SUTs	SUT233	ST1978	sense	230700	230803	103	56	9	99	28	3.6
chrXI	246383	246402	+	CUTs	CUT229	ST1983	sense	246233	246467	234	82	4	167	48	80
chrXI	248604	248602	+	intergenic_region	INT_0_5188	INT_0_5188	sense	248599	248623	24	36	10	4	5	7
chrXI	261935	261935	+	3UTR	CWP1	YKL096W	sense	261923	261936	13	10	4	10	6	10
chrXI	273389	273389	+	3UTR	CUE2	YKL090W	sense	273389	273392	3	6	4	1	2	5
chrXI	283280	283280	+	snoRNA	YKL081W_intron	intergenic	sense	283234	283285	51	653	212	3	5	316.5
chrXI	283413	283414	+	snoRNA_300_nt_downstream	YKL081W_intron	intergenic	sense	283362	283429	67	1210	302	9	11	134.333
chrXI	303166	303134	+	tRNA_100_nt_downstream	INT_0_5232	INT_0_5232	sense	303095	303229	134	54	5	81	31	13
chrXI	317735	317744	+	5UTR	MNR2	YKL064W	sense	317683	317825	142	58	11	112	24	28.5
chrXI	335657	335654	+	CUTs	CUT232	ST2017	sense	335592	335733	141	77	5	100	38	76
chrXI	364676	364676	+	snoRNA_300_nt_upstream	CUT234	ST2027	sense	364661	364690	29	835	346	3	5	834
chrXI	364726	364725	+	snoRNA_300_nt_upstream	CUT234	ST2027	sense	364716	364735	19	79	12	7	9	78
chrXI	364892	364925	+	snoRNA	SNR69	snR69	sense	364870	365306	436	8215	1131	164	139	432.316
chrXI	365410	365430	+	5UTR	INT_0_5290	INT_0_5290	sense	365382	365576	194	175	8	108	63	174
chrXI	382942	382942	+	CDS	YKL030W	YKL030W	sense	382919	382967	48	31	6	16	9	29
chrXI	421265	421266	+	CUTs	CUT237	ST2044	sense	421243	421274	31	35	8	22	10	17
chrXI	458792	458792	+	intergenic_region	INT_0_5354	INT_0_5354	sense	458787	458807	20	17	5	9	6	2.5
chrXI	490163	490142	+	CUTs	XUT_11F-216	572506	sense	490126	490248	122	79	7	96	32	26
chrXI	490319	490316	+	CUTs	CUT241	ST2067	sense	490288	490333	45	45	7	29	21	41
chrXI	490372	490381	+	CUTs	CUT241	ST2067	sense	490369	490464	95	73	4	72	33	12
chrXI	491145	491144	+	intergenic_region	INT_0_5377	INT_0_5377	sense	491138	491151	13	45	23	2	4	2.31579
chrXI	517921	517921	+	tRNA_100_nt_upstream	CUT243	ST2076	sense	517918	517924	6	21	6	1	3	19
chrXI	526855	526855	+	5UTR	INT_0_5408	INT_0_5408	sense	526830	526857	27	12	4	7	4	11
chrXI	530555	530555	+	3UTR	TRK2	YKR050W	sense	530551	530556	5	7	4	0	2	5
chrXI	534074	534074	+	SUTs	XUT_11F-230	572507	sense	534074	534096	22	11	5	7	5	3.33333
chrXI	534139	534139	+	SUTs	XUT_11F-230	572507	sense	534119	534167	48	47	10	25	14	5.75
chrXI	535531	535531	+	SUTs	XUT_11F-230	572507	sense	535531	535534	3	10	4	2	4	4
chrXI	559035	559034	+	3UTR	KTR2	YKR061W	sense	559034	559035	1	25	20	0	2	5
chrXI	578899	578899	+	tRNA_100_nt_upstream	XUT_11F-252	572510	sense	578894	578905	11	42	15	5	6	41
chrXI	580809	580824	+	3UTR	YKR075W-A	YKR075W-A	sense	580801	580948	147	67	11	105	27	5.07692
chrXI	615657	615650	+	5UTR	INT_0_5476	INT_0_5476	sense	615644	615657	13	20	5	9	8	15
chrIV	21577	21577	+	3UTR	YDL241W	YDL241W	sense	21577	21578	1	8	4	0	2	4
chrIV	57187	57178.6	+	CUTs	CUT049	ST0365	sense	57138	57205	67	52	8	40	18	51
chrIV	74396	74396	+	CUTs	XUT_4F-43	571744	sense	74396	74498	102	36	17	34	11	7
chrIV	80717	80717	+	SUTs	XUT_4F-50	571745	sense	80717	80731	14	11	4	6	6	3.33333
chrIV	92511	92511	+	3UTR	YDL206W	YDL206W	sense	92511	92541	30	15	4	10	7	2.33333
chrIV	130280	130280	+	intergenic_region	INT_0_1144	INT_0_1144	sense	130279	130288	9	10	5	1	3	4.5
chrIV	148048	148049	+	intergenic_region	INT_0_1159	INT_0_1159	sense	148030	148051	21	17	4	3	5	8
chrIV	160991	160991	+	intergenic_region	INT_0_1167	INT_0_1167	sense	160991	160998	7	6	4	0	2	5
chrIV	167580	167580	+	antisense_CDS	INT_0_1173	INT_0_1173	sense	167576	167584	8	14	6	4	5	13
chrIV	211332	211332	+	intergenic_region	INT_0_1201	INT_0_1201	sense	211330	211333	3	13	12	-1	1	13
chrIV	219811	219795	+	XUTs	XUT_4F-115	571751	sense	219764	219834	70	84	12	39	27	16.6
chrIV	226947	226947	+	intergenic_region	INT_0_1214	INT_0_1214	sense	226947	226953	6	9	5	5	4	3.5
chrIV	239498	239498	+	intergenic_region	XUT_4F-127	571753	sense	239498	239512	14	9	4	11	4	2.66667
chrIV	246553	246553	+	3UTR	YFH1	YDL120W	sense	246553	246555	2	9	4	1	3	3
chrIV	302811	302811	+	intergenic_region	INT_0_1273	INT_0_1273	sense	302799	302812	13	12	6	1	3	12
chrIV	331186	331186	+	CDS	BDF2	YDL070W	sense	331175	331204	29	56	13	6	8	55
chrIV	332353	332360	+	CDS	BDF2	YDL070W	sense	332347	332381	34	51	9	23	11	50
chrIV	359512	359512	+	tRNA_100_nt_upstream	INT_0_1317	INT_0_1317	sense	359507	359514	7	13	5	3	4	10
chrIV	366029	366029	+	intergenic_region	INT_0_1324	INT_0_1324	sense	366029	366060	31	8	4	29	4	2.33333
chrIV	367207	367207	+	antisense_CDS	INT_0_1324	INT_0_1324	sense	367175	367208	33	7	4	19	3	7
chrIV	501658	501658	+	SUTs	XUT_4F-248	571774	sense	501641	501661	20	22	6	3	5	10.5
chrIV	520906	520906	+	tRNA_100_nt_upstream	INT_0_1447	INT_0_1447	sense	520869	520907	38	16	4	3	5	7.5
chrIV	545872	545872	+	intergenic_region	INT_0_1464	INT_0_1464	sense	545826	545876	50	15	4	28	8	14
chrIV	682056	682077	+	antisense_CDS	INT_0_1564	INT_0_1564	sense	682056	682131	75	27	6	62	11	26
chrIV	698123	698123	+	3UTR	INT_0_1576	INT_0_1576	antisense	698123	698130	7	11	4	2	4	9
chrIV	700339	700336	+	CDS	YDR124W	YDR124W	sense	700333	700389	56	31	5	38	18	6
chrIV	770401	770434	+	3UTR	HOM2	YDR158W	sense	770376	770622	246	132	5	167	67	131
chrIV	807830	807828	+	3UTR	HSP42	YDR171W	sense	807828	807832	4	34	15	2	3	4.16667
chrIV	892985	892985	+	CDS	AHA1	YDR214W	sense	892959	893109	150	34	4	96	20	33
chrIV	899318	899318	+	intergenic_region	INT_0_1707	INT_0_1707	sense	899318	899341	23	12	8	6	3	5.5
chrIV	931142	931138	+	5UTR	LYS4	YDR234W	sense	931116	931192	76	90	7	53	32	17.8
chrIV	935319	935319	+	3UTR	PRP42	YDR235W	sense	935319	935320	1	4	4	-1	1	4
chrIV	952593	952593	+	3UTR	PEX5	YDR244W	sense	952592	952594	2	17	9	0	2	5.5
chrIV	977583	977583	+	XUTs	XUT_4F-447	571812	sense	977520	977585	65	24	9	40	11	2.75
chrIV	980049	980049	+	XUTs	XUT_4F-449	571814	sense	980042	980082	40	21	5	29	8	6.66667
chrIV	992766	992763	+	tRNA_100_nt_upstream	INT_0_1774	INT_0_1774	sense	992710	992775	65	92	17	28	25	45.5
chrIV	1012077	1.01208e+06	+	5UTR	INT_0_1791	INT_0_1791	sense	1012048	1012083	35	25	6	11	6	24
chrIV	1050532	1050516	+	XUTs	XUT_4F-491	571818	sense	1050507	1050557	50	43	14	26	13	2.625
chrIV	1059447	1059447	+	intergenic_region	INT_0_1824	INT_0_1824	sense	1059438	1059448	10	12	5	8	5	10
chrIV	1189535	1189535	+	5UTR	CUT086	ST0691	sense	1189534	1189536	2	7	5	0	2	7
chrIV	1189605	1189605	+	5UTR	CUT086	ST0691	sense	1189544	1189624	80	58	5	62	33	14.25
chrIV	1238341	1238350	+	CUTs	CUT087	ST0706	sense	1238313	1238365	52	50	14	27	10	2.33333
chrIV	1239092	1239089	+	CUTs	CUT087	ST0706	sense	1239089	1239099	10	34	7	7	9	2.46154
chrIV	1243232	1243242	+	CDS	EFT2	YDR385W	sense	1243218	1243262	44	45	4	26	17	44
chrIV	1267236	1267236	+	SUTs	SUT073	ST0718	sense	1267223	1267245	22	11	4	14	6	10
chrIV	1267492	1267492	+	CDS	UTP5	YDR398W	sense	1267487	1267620	133	48	4	73	24	7.83333
chrIV	1270119	1.27012e+06	+	CDS	HPT1	YDR399W	sense	1270080	1270157	77	64	9	28	19	63
chrIV	1270210	1270210	+	CDS	HPT1	YDR399W	sense	1270179	1270254	75	44	4	53	22	43
chrIV	1270357	1270357	+	CDS	HPT1	YDR399W	sense	1270290	1270371	81	46	4	54	23	45
chrIV	1302690	1302683	+	CUTs	CUT091	ST0731	sense	1302680	1302735	55	63	20	28	13	2.69565
chrIV	1319753	1319778	+	intergenic_region	CUT092	ST0735	sense	1319693	1319846	153	58	6	111	28	14.25
chrIV	1330451	1330446	+	3UTR	YDR433W	YDR433W	sense	1330446	1330451	5	12	7	4	3	2.5
chrIV	1361051	1361051	+	CUTs	CUT096	ST0749	sense	1361050	1361053	3	8	4	2	3	6
chrIV	1403042	1.40312e+06	+	snoRNA	SNR13	snR13	sense	1403005	1403466	461	3967	446	196	143	305.077
chrIV	1410323	1410323	+	intergenic_region	INT_0_2077	INT_0_2077	sense	1410314	1410324	10	9	4	7	4	9
chrIV	1411963	1411963	+	intergenic_region	SUT076	ST0765	sense	1411951	1411964	13	13	4	11	8	13
chrVIII	53203	53203	+	3UTR	INT_0_4053	INT_0_4053	sense	53203	53221	18	9	5	12	4	2
chrVIII	82298	82298	+	antisense_CDS	INT_0_4079	INT_0_4079	sense	82183	82346	163	58	5	125	34	57
chrVIII	102624	102625	+	CDS	HSE1	YHL002W	sense	102571	102679	108	37	6	60	16	2.57143
chrVIII	123091	123119	+	SUTs	SUT153	ST1417	sense	122903	123213	310	129	5	222	70	128
chrVIII	146145	146144	+	3UTR	YHR020W	YHR020W	sense	146144	146145	1	16	12	0	2	4
chrVIII	167670	167672	+	CDS	YHR028W-A	YHR028W-A	sense	167665	167711	46	22	5	10	7	5.25
chrVIII	168857	168857	+	intergenic_region	INT_0_4150	INT_0_4150	sense	168857	168858	1	5	4	0	2	4
chrVIII	217952	217952	+	3UTR	YHR056W-A	YHR056W-A	sense	217937	217954	17	9	6	14	2	8
chrVIII	262826	262826	+	antisense_CDS	INT_0_4231	INT_0_4231	sense	262826	262827	1	4	4	-1	1	4
chrVIII	294347	294335	+	SUTs	XUT_8F-131	572242	sense	294268	294411	143	111	9	96	35	109
chrVIII	294519	294519	+	SUTs	XUT_8F-131	572242	sense	294473	294520	47	9	4	45	5	8
chrVIII	324555	324544	+	3UTR	GRE3	YHR104W	sense	324544	324556	12	17	10	10	3	2.14286
chrVIII	362191	362246	+	CDS	FUR1	YHR128W	sense	362120	362353	233	184	10	141	67	183
chrVIII	381814	381839	+	snoRNA_300_nt_downstream	INT_0_4322	INT_0_4322	sense	381748	381948	200	3730	190	62	61	69.0556
chrVIII	381990	382004	+	snoRNA_300_nt_downstream	INT_0_4322	INT_0_4322	sense	381972	382026	54	101	10	28	22	49.5
chrVIII	382054	382057	+	antisense_CDS	INT_0_4322	INT_0_4322	sense	382049	382102	53	54	5	31	21	53
chrVIII	411136	411135	+	snoRNA_300_nt_upstream	LIN1	YHR156C	antisense	411120	411176	56	290	116	6	6	144.5
chrVIII	411342	411423	+	snoRNA	SNR71	snR71	sense	411313	411790	477	3295	356	229	179	94.1143
chrVIII	412348	412355	+	antisense_CDS	CUT181	ST1523	sense	412255	412396	141	263	58	16	17	11.9091
chrVIII	462066	462018	+	CUTs	CUT182	ST1540	sense	461793	462131	338	110	5	242	62	6.41176
chrVIII	467078	467078	+	tRNA_100_nt_downstream	YHR180W-A	YHR180W-A	sense	467071	467079	8	11	4	5	6	10
chrVIII	517235	517235	+	SUTs	SUT173	ST1563	sense	517235	517240	5	9	8	-1	1	4
chrVIII	554388	554417	+	5UTR	IMD2	YHR216W	sense	554361	554534	173	763	39	96	64	29.3077
chrVIII	554676	554676	+	CDS	IMD2	YHR216W	sense	554612	554677	65	27	4	49	17	27
chrIX	56312	56312	-	antisense_CDS	INT_0_2221	INT_0_2221	sense	56287	56331	44	21	7	32	9	5
chrIX	73972	73972	-	3UTR	INT_0_2229	INT_0_2229	sense	73972	73974	2	5	4	1	2	4
chrIX	98333	98333	-	intergenic_region	INT_0_2249	INT_0_2249	sense	98333	98334	1	6	4	0	2	4
chrIX	135378	135392	-	antisense_CDS	INT_0_2270	INT_0_2270	sense	135344	135520	176	89	9	116	41	44
chrIX	177287	177287	-	intergenic_region	XBP1	YIL101C	sense	177213	177358	145	45	4	111	26	4.88889
chrIX	309268	309268	-	3UTR	YIL024C	YIL024C	sense	309268	309269	1	4	4	-1	1	4
chrIX	338189	338189	-	intergenic_region	INT_0_2442	INT_0_2442	sense	338188	338194	6	6	4	4	2	5
chrIX	342050	342047	-	CUTs	CUT666	ST5346	sense	341935	342081	146	71	10	107	28	70
chrIX	342128	342128	-	CUTs	CUT666	ST5346	sense	342119	342161	42	19	5	23	10	18
chrIX	362797	362797	-	CUTs	CUT668	ST5353	sense	362754	362896	142	102	5	87	50	33.6667
chrIX	381771	381763	-	5UTR	GAT4	YIR013C	sense	381593	381810	217	149	5	104	63	148
chrIX	381891	381891	-	CUTs	CUT669	ST5357	sense	381871	381936	65	46	4	46	23	42
chrXIII	32997	32997	-	antisense_CDS	INT_0_6294	INT_0_6294	sense	32997	33008	11	6	4	3	2	5
chrXIII	43702	43702	-	5UTR	TAF8	YML114C	sense	43694	43715	21	24	8	10	8	23
chrXIII	45929	45909	-	CUTs	XUT_13R-20	572770	sense	45880	45991	111	134	46	39	22	2.14516
chrXIII	67535	67574.3	-	snoRNA_300_nt_downstream	NUP188	YML103C	sense	67490	67632	142	73	4	92	34	72
chrXIII	67697	67704.2	-	snoRNA_300_nt_downstream	INT_0_6315	INT_0_6315	sense	67664	67769	105	2787	1195	41	38	214.308
chrXIII	67994	67992.9	-	snoRNA_300_nt_upstream	INT_0_6316	INT_0_6316	sense	67986	68010	24	41	17	3	4	40
chrXIII	92116	92116	-	intergenic_region	INT_0_6335	INT_0_6335	sense	92116	92117	1	5	5	-1	1	5
chrXIII	110408	110421	-	CUTs	CUT760	ST6165	sense	110302	110487	185	76	6	127	32	75
chrXIII	141507	141507	-	CDS	SMA2	YML066C	sense	141433	141535	102	43	4	70	25	5.25
chrXIII	153082	153082	-	3UTR	OGG1	YML060W	antisense	153082	153087	5	7	4	4	3	5
chrXIII	163309	163314	-	snoRNA_300_nt_downstream	IMD4	YML056C	sense	163289	163372	83	1827	431	13	14	57.0625
chrXIII	163509	163522	-	snoRNA_300_nt_downstream	YML056C_intron	intergenic	sense	163475	163538	63	772	167	24	14	770
chrXIII	184032	184032	-	tRNA_100_nt_upstream	INT_0_6404	INT_0_6404	sense	184031	184046	15	17	4	13	7	14
chrXIII	196232	196235	-	tRNA_100_nt_upstream	INT_0_6409	INT_0_6409	sense	196227	196249	22	30	6	10	8	29
chrXIII	220649	220649	-	XUTs	XUT_13R-87	572776	sense	220595	220673	78	20	4	53	11	19
chrXIII	258559	258559	-	5UTR	GIS4	YML006C	sense	258545	258570	25	17	4	21	7	16
chrXIII	259304	259304	-	tRNA_100_nt_upstream	INT_0_6455	INT_0_6455	sense	259304	259308	4	7	6	-1	1	6
chrXIII	273111	273111	-	intergenic_region	INT_0_6466	INT_0_6466	sense	273111	273113	2	7	5	0	2	6
chrXIII	279788	279775	-	intergenic_region	PLB2	YMR006C	sense	279775	279813	38	30	8	21	7	2.07143
chrXIII	321301	321301	-	tRNA_100_nt_upstream	INT_0_6510	INT_0_6510	sense	321290	321305	15	10	6	10	2	9
chrXIII	349497	349499	-	CDS	SUB1	YMR039C	sense	349431	349519	88	54	7	70	21	53
chrXIII	349641	349641	-	5UTR	SUB1	YMR039C	sense	349632	349650	18	19	5	14	10	17
chrXIII	352480	352503	-	CUTs	CUT767	ST6236	sense	352480	352519	39	27	5	24	12	3.71429
chrXIII	354705	354705	-	antisense_CDS	INT_0_6535	INT_0_6535	sense	354683	354757	74	24	4	47	16	7.66667
chrXIII	379022	379022	-	intergenic_region	INT_0_6548	INT_0_6548	sense	379018	379028	10	6	4	5	2	5
chrXIII	412892	412891	-	5UTR	IRC21	YMR073C	sense	412891	412894	3	15	9	0	2	2.8
chrXIII	433082	433082	-	CUTs	CUT773	ST6258	sense	433082	433098	16	39	20	4	6	3.8
chrXIII	472713	472712	-	3UTR	YMR102C	YMR102C	sense	472712	472713	1	11	7	0	2	4
chrXIII	472725	472723	-	3UTR	YMR102C	YMR102C	sense	472716	472725	9	52	17	7	9	3.88889
chrXIII	480765	480765	-	tRNA_100_nt_upstream	INT_0_6629	INT_0_6629	sense	480758	480766	8	5	4	6	2	5
chrXIII	494619	494622	-	5UTR	MED11	YMR112C	sense	494561	494638	77	32	4	40	14	15.5
chrXIII	496191	496191	-	antisense_CDS	INT_0_6640	INT_0_6640	sense	496191	496194	3	5	4	2	2	4
chrXIII	499881	499880	-	snoRNA_300_nt_downstream	ASC1	YMR116C	sense	499872	499900	28	914	322	3	5	304.333
chrXIII	499959	499963	-	snoRNA_300_nt_downstream	YMR116C_intron	intergenic	sense	499921	499987	66	3553	639	23	24	221.375
chrXIII	507367	507367	-	3UTR	ADE17	YMR120C	sense	507367	507377	10	7	4	0	2	2
chrXIII	545415	545415	-	CUTs	CUT776	ST6292	sense	545289	545472	183	42	4	114	26	41
chrXIII	596580	596580	-	3UTR	INT_0_6723	INT_0_6723	sense	596575	596581	6	10	5	1	3	7
chrXIII	619205	619205	-	SUTs	XUT_13R-279	572809	sense	619205	619212	7	11	4	6	5	3.5
chrXIII	628426	628408	-	antisense_CDS	INT_0_6753	INT_0_6753	sense	628206	628561	355	197	10	219	82	196
chrXIII	649594	649594	-	CUTs	CUT782	ST6325	sense	649594	649631	37	13	4	30	7	12
chrXIII	654875	654872	-	CUTs	CUT783	ST6328	sense	654858	654915	57	45	6	37	17	3.14286
chrXIII	658323	658323	-	3UTR	CUT784	ST6329	sense	658323	658326	3	9	4	2	3	3
chrXIII	667219	667223	-	5UTR	RAD14	YMR201C	sense	667213	667291	78	141	21	19	20	140
chrXIII	671666	671666	-	3UTR	PFK2	YMR205C	sense	671666	671668	2	6	4	0	2	2.5
chrXIII	744884	744879	-	antisense_CDS	INT_0_6826	INT_0_6826	sense	744877	744895	18	32	13	6	6	4.42857
chrXIII	745693	745711	-	antisense_CDS	INT_0_6826	INT_0_6826	sense	745568	745758	190	79	4	128	45	78
chrXIII	762083	762035	-	antisense_CDS	INT_0_6841	INT_0_6841	sense	761590	762136	546	4910	949	133	94	17.4043
chrXIII	808281	808288	-	tRNA	CDC65	tQ(CUG)M	sense	808252	808301	49	29	5	33	15	28
chrXIII	863532	863532	-	3UTR	INT_0_6920	INT_0_6920	sense	863530	863533	3	8	4	1	3	8
chrXIII	881855	881855	-	antisense_CDS	INT_0_6936	INT_0_6936	sense	881855	881858	3	7	4	1	2	6
chrXIII	897991	897991	-	intergenic_region	INT_0_6945	INT_0_6945	sense	897986	897993	7	8	4	5	3	3.5
chrXIII	902501	902501	-	intergenic_region	INT_0_6948	INT_0_6948	sense	902455	902542	87	31	5	75	13	2.30769
chrXIII	914460	914460	-	CDS	FET4	YMR319C	sense	914449	914461	12	8	5	10	4	8
chrII	84422	84422	-	3UTR	INT_0_261	INT_0_261	sense	84422	84431	9	5	4	8	2	2
chrII	105238	105238	-	3UTR	INT_0_278	INT_0_278	sense	105238	105246	8	10	6	7	4	2
chrII	109936	109936	-	3UTR	CMC2	YBL059C-A	sense	109936	109943	7	6	4	6	2	2
chrII	137743	137743	-	intergenic_region	INT_0_300	INT_0_300	sense	137719	137766	47	35	8	20	9	16.5
chrII	143786	143785	-	3UTR	INT_0_305	INT_0_305	sense	143785	143786	1	10	6	0	2	4
chrII	216317	216317	-	CDS	SLA1	YBL007C	sense	216317	216352	35	11	4	32	4	2.25
chrII	235710	235701	-	CDS	HTA2	YBL003C	sense	235584	235724	140	220	12	106	61	219
chrII	235771	235768	-	CDS	HTA2	YBL003C	sense	235752	235835	83	80	15	31	19	9.75
chrII	254867	254853	-	5UTR	FLR1	YBR008C	sense	254853	254868	15	25	7	13	7	2.4
chrII	278840	278841	-	CUTs	CUT445	ST3752	sense	278832	278859	27	24	9	10	7	3.28571
chrII	289532	289532	-	antisense_CDS	INT_0_408	INT_0_408	sense	289531	289535	4	10	4	2	4	9
chrII	291741	291774	-	CDS	OLA1	YBR025C	sense	291703	291845	142	114	4	78	49	111
chrII	307101	307131	-	snoRNA_300_nt_downstream	CUT447	ST3762	sense	306878	307264	386	5120	995	72	64	189.593
chrII	343855	343855	-	antisense_CDS	INT_0_454	INT_0_454	sense	343818	343972	154	58	4	107	32	57
chrII	349341	349343	-	antisense_CDS	INT_0_457	INT_0_457	sense	349328	349366	38	17	4	33	8	4
chrII	375756	375756	-	intergenic_region	INT_0_484	INT_0_484	sense	375756	375757	1	4	4	-1	1	4
chrII	389517	389517	-	intergenic_region	INT_0_493	INT_0_493	sense	389513	389528	15	9	4	13	4	8
chrII	390090	390090	-	intergenic_region	INT_0_493	INT_0_493	sense	390083	390129	46	21	4	40	12	9.5
chrII	390160	390159	-	3UTR	XUT_2R-172	571674	sense	390157	390181	24	23	7	4	5	3.66667
chrII	391165	391137	-	3UTR	YBR076C-A	YBR076C-A	sense	391081	391172	91	445	114	20	21	2.1407
chrII	391174	391213	-	3UTR	YBR076C-A	YBR076C-A	sense	391174	391266	92	75	22	37	20	2.11765
chrII	449062	449062	-	antisense_CDS	INT_0_534	INT_0_534	sense	448924	449110	186	66	4	151	39	64
chrII	533045	533050	-	intergenic_region	INT_0_585	INT_0_585	sense	533026	533088	62	30	5	37	13	29
chrII	539541	539541	-	CUTs	CUT455	ST3836	sense	539315	539558	243	68	4	149	44	67
chrII	549204	549204	-	CUTs	CUT456	ST3840	sense	549203	549291	88	38	4	59	19	4.11111
chrII	558209	558209	-	intergenic_region	INT_0_604	INT_0_604	sense	558191	558252	61	22	4	32	13	5.25
chrII	559751	559751	-	intergenic_region	INT_0_604	INT_0_604	sense	559714	559752	38	10	5	29	3	10
chrII	613843	613843	-	CDS	PGI1	YBR196C	sense	613787	613856	69	35	4	50	17	34
chrII	651248	651248	-	intergenic_region	INT_0_679	INT_0_679	sense	651248	651249	1	4	4	-1	1	4
chrII	679409	679408	-	3UTR	INT_0_701	INT_0_701	sense	679408	679409	1	17	13	0	2	4
chrII	680717	680715	-	snRNA	INT_0_702	INT_0_702	sense	680687	680752	65	361	85	21	19	180
chrII	689307	689307	-	XUTs	XUT_2R-288	571685	sense	689307	689308	1	4	4	-1	1	4
chrII	726740	726740	-	CDS	YBR255C-A	YBR255C-A	sense	726731	726795	64	22	4	51	12	21
chrII	804535	804535	-	5UTR	MAL31	YBR298C	sense	804535	804536	1	4	4	-1	1	4
chrVI	74516	74516	-	5UTR	INT_0_3041	INT_0_3041	antisense	74516	74524	8	9	4	6	3	2
chrVI	94950	94950	-	CDS	FRS2	YFL022C	sense	94873	94960	87	40	4	51	24	39
chrVI	131175	131175	-	ncRNA	SUT527	ST4699	sense	131130	131238	108	41	4	82	22	20
chrVI	137622	137622	-	tRNA_100_nt_upstream	INT_0_3095	INT_0_3095	sense	137616	137642	26	32	9	13	11	31
chrVI	201770	201770	-	3UTR	INT_0_3134	INT_0_3134	sense	201770	201771	1	4	4	-1	1	4
chrVI	205064	205064	-	tRNA_100_nt_upstream	INT_0_3138	INT_0_3138	sense	205062	205065	3	5	4	1	2	5
chrVI	210778	210778	-	tRNA_100_nt_upstream	INT_0_3143	INT_0_3143	sense	210777	210787	10	15	6	2	4	14
chrVI	251968	251969	-	CUTs	CUT580	ST4736	sense	251942	251998	56	75	18	5	7	74
chrVI	263525	263525	-	CUTs	XUT_6R-115	572066	sense	263442	263526	84	23	4	59	13	23
chrI	62604	62604	-	intergenic_region	INT_0_96	INT_0_96	sense	62602	62605	3	12	10	-1	1	11
chrI	67703	67703	-	5UTR	CLN3	YAL040C	sense	67652	67707	55	17	4	31	9	16
chrI	67769	67769	-	5UTR	CLN3	YAL040C	sense	67734	67839	105	31	5	61	15	30
chrI	151595	151595	-	intergenic_region	INT_0_154	INT_0_154	sense	151594	151596	2	9	4	0	2	5
chrXII	77066	77066	-	3UTR	INT_0_5551	INT_0_5551	sense	77066	77079	13	9	4	8	4	2
chrXII	87252	87252	-	intergenic_region	INT_0_5555	INT_0_5555	sense	87237	87269	32	6	4	16	2	5
chrXII	115661	115661	-	CUTs	CUT730	ST5860	sense	115661	115663	2	5	4	1	2	4
chrXII	131039	131018	-	intergenic_region	INT_0_5583	INT_0_5583	sense	131018	131064	46	78	30	23	16	2.20588
chrXII	147319	147319	-	antisense_CDS	INT_0_5593	INT_0_5593	sense	147319	147449	130	23	4	108	13	11
chrXII	167999	167999	-	tRNA	tS(AGA)L	tS(AGA)L	sense	167999	168009	10	5	4	9	2	4
chrXII	228763	228765	-	3UTR	INT_0_5653	INT_0_5653	sense	228728	228774	46	94	17	14	14	2.43243
chrXII	228775	228788	-	3UTR	YLR040C	YLR040C	sense	228775	228789	14	32	15	9	5	2.81818
chrXII	230521	230521	-	5UTR	YLR042C	YLR042C	sense	230521	230522	1	7	4	0	2	4
chrXII	231361	231361	-	intergenic_region	INT_0_5658	INT_0_5658	sense	231360	231362	2	7	4	0	2	7
chrXII	254885	254885	-	antisense_CDS	INT_0_5675	INT_0_5675	sense	254884	254910	26	11	4	13	5	10
chrXII	259493	259493	-	5UTR	SHM2	YLR058C	sense	259493	259494	1	8	4	0	2	4
chrXII	264762	264818	-	antisense_CDS	INT_0_5683	INT_0_5683	sense	264672	264938	266	228	11	146	80	18.8333
chrXII	340944	340963	-	5UTR	ICT1	YLR099C	sense	340888	341030	142	70	5	95	32	34.5
chrXII	348425	348325	-	CDS	SEN2	YLR105C	sense	348035	348430	395	1835	191	190	131	87.2857
chrXII	348603	348599	-	snoRNA_300_nt_upstream	INT_0_5741	INT_0_5741	sense	348530	348614	84	1009	492	6	8	201.6
chrXII	361803	361804	-	CDS	MDN1	YLR106C	sense	361799	361824	25	35	7	10	7	34
chrXII	369520	369520	-	intergenic_region	INT_0_5747	INT_0_5747	sense	369520	369521	1	6	4	0	2	4
chrXII	459965	459963	-	rRNA	NTS1-2	NTS1-2	sense	459957	459987	30	33	15	5	5	8
chrXII	489750	489747	-	antisense_CDS	INT_0_5835	INT_0_5835	sense	489740	489750	10	5800	4919	-1	1	35.24
chrXII	501185	501185	-	3UTR	INT_0_5852	INT_0_5852	sense	501185	501186	1	5	4	0	2	4
chrXII	505592	505523	-	CUTs	CUT738	ST5973	sense	505346	505633	287	94	7	185	53	93
chrXII	523045	523045	-	antisense_CDS	INT_0_5869	INT_0_5869	sense	523031	523067	36	9	4	23	5	8
chrXII	538433	538433	-	intergenic_region	INT_0_5875	INT_0_5875	sense	538432	538437	5	17	7	3	4	2.2
chrXII	540697	540695	-	intergenic_region	INT_0_5879	INT_0_5879	sense	540695	540698	3	24	8	1	3	2.25
chrXII	541551	541551	-	CDS	YLR194C	YLR194C	sense	541551	541552	1	5	4	0	2	4
chrXII	543364	543360	-	CUTs	CUT740	ST5985	sense	543333	543415	82	50	6	40	24	49
chrXII	570649	570649	-	3UTR	INT_0_5902	INT_0_5902	sense	570649	570655	6	6	5	-1	1	2.5
chrXII	628556	628557	-	3UTR	INT_0_5946	INT_0_5946	sense	628556	628586	30	19	4	27	7	2
chrXII	657073	657073	-	tRNA_100_nt_upstream	INT_0_5965	INT_0_5965	sense	657073	657076	3	6	5	-1	1	5
chrXII	657680	657692	-	CUTs	XUT_12R-237	572666	sense	657583	657787	204	122	7	84	46	121
chrXII	659794	659794	-	intergenic_region	INT_0_5967	INT_0_5967	sense	659794	659802	8	11	4	7	5	8
chrXII	672544	672510	-	CUTs	CUT744	ST6023	sense	672379	672594	215	130	7	114	55	129
chrXII	687762	687762	-	tRNA_100_nt_downstream	INT_0_5993	INT_0_5993	sense	687762	687769	7	8	5	3	3	2.33333
chrXII	718146	718146	-	3UTR	INT_0_6017	INT_0_6017	sense	718146	718147	1	9	6	0	2	6
chrXII	721669	721669	-	intergenic_region	INT_0_6021	INT_0_6021	sense	721669	721677	8	13	5	7	6	2
chrXII	788413	788413	-	antisense_CDS	INT_0_6069	INT_0_6069	sense	788412	788414	2	5	4	0	2	5
chrXII	794030	794029	-	CUTs	CUT748	ST6065	sense	794017	794035	18	43	7	11	10	42
chrXII	794265	794323	-	CUTs	CUT748	ST6065	sense	794136	794516	380	3631	137	184	168	17.3636
chrXII	794695	794686	-	snoRNA_300_nt_downstream	INT_0_6077	INT_0_6077	sense	794650	794701	51	357	73	26	15	178
chrXII	794820	794870	-	snoRNA_300_nt_downstream	INT_0_6078	INT_0_6078	sense	794815	794961	146	1439	125	113	69	130.727
chrXII	795143	795142	-	snoRNA_300_nt_upstream	INT_0_6079	INT_0_6079	sense	795106	795177	71	249	75	19	14	248
chrXII	827868	827847	-	CDS	DIC1	YLR348C	sense	827731	827960	229	167	9	161	62	3.07407
chrXII	855248	855286	-	XUTs	XUT_12R-313	572679	sense	855131	855428	297	110	4	218	59	54.5
chrXII	877568	877568	-	intergenic_region	INT_0_6145	INT_0_6145	sense	877566	877614	48	28	8	32	10	27
chrXII	906653	906653	-	5UTR	ART10	YLR392C	sense	906648	906657	9	9	6	7	3	8
chrXII	921597	921595	-	CDS	BDF1	YLR399C	sense	921562	921630	68	36	5	52	14	35
chrXII	930297	930297	-	antisense_CDS	INT_0_6177	INT_0_6177	sense	930286	930306	20	8	4	17	4	7
chrXII	949181	949172	-	3UTR	YLR412C-A	YLR412C-A	sense	949153	949202	49	34	5	33	11	3
chrXII	949887	949887	-	3UTR	YLR412C-A	YLR412C-A	sense	949831	949952	121	34	4	103	20	31
chrXII	963121	963121	-	tRNA_100_nt_upstream	INT_0_6201	INT_0_6201	sense	963113	963163	50	36	12	11	7	17.5
chrXII	988053	988058	-	CUTs	CUT755	ST6114	sense	988017	988080	63	40	6	43	14	19.5
chrXII	1025461	1025461	-	SUTs	SUT711	ST6123	sense	1025461	1025463	2	5	4	1	2	4
chrXII	1038824	1038824	-	3UTR	INT_0_6244	INT_0_6244	sense	1038824	1038825	1	5	4	0	2	4
chrXII	1042997	1.043e+06	-	5UTR	CUT756	ST6129	sense	1042887	1043095	208	77	5	162	46	7.6
chrXII	1058504	1058504	-	antisense_CDS	INT_0_6256	INT_0_6256	sense	1058504	1058505	1	5	5	0	2	5
chrXIV	31511	31481.3	-	CUTs	CUT795	ST6412	sense	31416	31536	120	82	10	62	29	5.78571
chrXIV	64752	64750.7	-	CUTs	CUT797	ST6426	sense	64743	64753	10	17	5	4	5	14
chrXIV	86882	86882	-	CUTs	CUT799	ST6432	sense	86837	86897	60	31	4	48	18	30
chrXIV	89551	89561.5	-	intergenic_region	INT_0_7028	INT_0_7028	sense	89483	89599	116	68	7	74	28	67
chrXIV	129384	129384	-	3UTR	INT_0_7061	INT_0_7061	antisense	129384	129386	2	9	4	1	3	3.5
chrXIV	135839	135839	-	3UTR	INT_0_7063	INT_0_7063	sense	135839	135854	15	16	5	4	5	2.14286
chrXIV	172440	172440	-	3UTR	INT_0_7086	INT_0_7086	sense	172418	172467	49	415	61	20	20	2.67097
chrXIV	172511	172531	-	3UTR	INT_0_7086	INT_0_7086	sense	172510	172552	42	117	40	9	8	2.14815
chrXIV	174344	174347	-	5UTR	NRD1	YNL251C	sense	174267	174427	160	78	12	94	29	25.6667
chrXIV	185048	185048	-	CUTs	CUT804	ST6459	sense	184951	185074	123	62	5	95	36	61
chrXIV	191931	191931	-	antisense_CDS	INT_0_7097	INT_0_7097	sense	191928	191932	4	9	4	2	3	6
chrXIV	199035	199036	-	CDS	NAR1	YNL240C	sense	199033	199047	14	13	4	3	4	12
chrXIV	216448	216448	-	CDS	PDR16	YNL231C	sense	216445	216452	7	7	5	3	2	6
chrXIV	229992	229992	-	intergenic_region	INT_0_7123	INT_0_7123	sense	229991	229995	4	11	4	1	3	10
chrXIV	230037	230041	-	intergenic_region	INT_0_7123	INT_0_7123	sense	230032	230057	25	44	12	19	9	41
chrXIV	230122	230122	-	snRNA	SNR19	snR19	sense	230117	230143	26	16	6	5	6	15
chrXIV	250561	250561	-	5UTR	YNL211C	YNL211C	sense	250560	250562	2	6	4	0	2	5
chrXIV	256721	256721	-	3UTR	RTT106	YNL206C	sense	256721	256738	17	7	4	15	2	3
chrXIV	275591	275591	-	CUTs	CUT806	ST6487	sense	275576	275643	67	21	5	52	9	5
chrXIV	317921	317921	-	3UTR	FMP41	YNL168C	sense	317904	317926	22	12	4	18	5	5.5
chrXIV	334740	334746	-	antisense_CDS	INT_0_7197	INT_0_7197	sense	334668	334819	151	65	4	101	40	64
chrXIV	349241	349241	-	3UTR	INT_0_7213	INT_0_7213	sense	349241	349242	1	5	5	-1	1	5
chrXIV	355141	355141	-	5UTR	YNL144C	YNL144C	sense	355113	355142	29	12	5	17	5	12
chrXIV	358911	358872	-	CUTs	CUT807	ST6511	sense	358782	358978	196	74	5	142	43	14.6
chrXIV	379257	379257	-	intergenic_region	INT_0_7241	INT_0_7241	sense	379257	379278	21	6	4	19	2	5
chrXIV	412668	412668	-	3UTR	INT_0_7264	INT_0_7264	sense	412666	412671	5	23	9	1	3	10.5
chrXIV	426788	426788	-	5UTR	LEU4	YNL104C	sense	426629	426800	171	50	4	130	26	49
chrXIV	426858	426884	-	5UTR	LEU4	YNL104C	sense	426846	426992	146	100	13	110	45	3.09375
chrXIV	500714	500714	-	intergenic_region	INT_0_7332	INT_0_7332	sense	500713	500726	13	8	4	0	2	7
chrXIV	505603	505603	-	intergenic_region	INT_0_7338	INT_0_7338	sense	505603	505635	32	16	4	30	8	2.8
chrXIV	505750	505750	-	3UTR	INT_0_7338	INT_0_7338	sense	505750	505751	1	4	4	-1	1	4
chrXIV	507205	507191	-	5UTR	YDJ1	YNL064C	sense	507004	507286	282	151	12	165	52	18.75
chrXIV	529315	529318	-	CUTs	CUT817	ST6555	sense	529180	529417	237	122	8	152	57	121
chrXIV	547239	547239	-	XUTs	XUT_14R-232	572920	sense	547233	547249	16	11	4	13	5	10
chrXIV	558894	558894	-	CDS	IDH1	YNL037C	sense	558891	558915	24	14	4	18	8	13
chrXIV	558966	558966	-	CDS	IDH1	YNL037C	sense	558949	559082	133	75	5	83	37	74
chrXIV	570009	570009	-	tRNA_100_nt_upstream	INT_0_7386	INT_0_7386	sense	570000	570027	27	33	4	17	14	32
chrXIV	602425	602423	-	CDS	YNL017C	YNL017C	sense	602408	602457	49	32	5	29	12	31
chrXIV	619552	619552	-	CDS	SIS1	YNL007C	sense	619471	619584	113	36	4	70	20	17.5
chrXIV	638883	638883	-	3UTR	ATG3	YNR007C	sense	638883	638914	31	7	4	10	3	6
chrXIV	647069	647069	-	intergenic_region	INT_0_7457	INT_0_7457	sense	647068	647079	11	22	8	7	5	21
chrXIV	652332	652331	-	intergenic_region	INT_0_7459	INT_0_7459	sense	652331	652332	1	10	6	0	2	4
chrXIV	654591	654591	-	3UTR	INT_0_7460	INT_0_7460	sense	654587	654597	10	19	5	6	7	6
chrXIV	655789	655790	-	CDS	ACC1	YNR016C	sense	655764	655817	53	48	16	21	11	47
chrXIV	663759	663762	-	intergenic_region	INT_0_7466	INT_0_7466	sense	663736	663775	39	43	14	5	6	4.2
chrXIV	707267	707267	-	CUTs	XUT_14R-308	572932	sense	707266	707312	46	12	4	43	7	11
chrXIV	708122	708122	-	antisense_CDS	INT_0_7498	INT_0_7498	sense	708074	708151	77	24	4	46	10	23
chrXIV	713995	713995	-	3UTR	LYS9	YNR050C	sense	713995	713996	1	4	4	-1	1	4
chrXIV	721777	721776	-	snoRNA_300_nt_downstream	NOG2	YNR053C	sense	721767	721802	35	56	10	24	14	11
chrXIV	727805	727805	-	intergenic_region	INT_0_7513	INT_0_7513	sense	727805	727806	1	9	5	0	2	5
chrXIV	736174	736174	-	XUTs	SUT756	ST6613	sense	736116	736175	59	22	4	44	14	22
chrX	29608	29608	-	intergenic_region	INT_0_4469	INT_0_4469	sense	29608	29631	23	17	4	17	8	16
chrX	63399	63399	-	CUTs	CUT671	ST5388	sense	63327	63431	104	40	4	88	23	38
chrX	79600	79601.6	-	5UTR	SWE1	YJL187C	sense	79580	79635	55	112	20	32	16	111
chrX	83341	83341	-	intergenic_region	INT_0_4513	INT_0_4513	sense	83319	83377	58	15	5	28	7	14
chrX	116075	116081	-	tRNA_100_nt_upstream	INT_0_4545	INT_0_4545	sense	116073	116106	33	88	21	21	17	87
chrX	117541	117541	-	SUTs	XUT_10R-39	572425	sense	117537	117546	9	14	4	2	4	13
chrX	118769	118777	-	CDS	YJL160C	YJL160C	sense	118719	118846	127	162	18	66	41	32.2
chrX	122012	122012	-	3UTR	INT_0_4551	INT_0_4551	sense	122011	122042	31	28	4	26	13	2.08333
chrX	136235	136235	-	5UTR	INO1	YJL153C	sense	136176	136287	111	55	8	62	22	4.41667
chrX	139542	139519	-	CUTs	CUT676	ST5423	sense	139167	139573	406	52696	12615	14	16	321.311
chrX	139757	139757	-	snoRNA_300_nt_downstream	INT_0_4569	INT_0_4569	sense	139746	139768	22	171	67	2	4	56.6667
chrX	139993	140025	-	snoRNA_300_nt_upstream	CUT677	ST5426	sense	139990	140069	79	465	109	59	36	116
chrX	160562	160562	-	intergenic_region	INT_0_4591	INT_0_4591	sense	160562	160578	16	11	4	1	3	9
chrX	172824	172800	-	5UTR	INT_0_4596	INT_0_4596	antisense	172609	172917	308	1931	248	159	117	385.8
chrX	180646	180675	-	intergenic_region	INT_0_4602	INT_0_4602	sense	180591	180767	176	201	12	83	45	25
chrX	191084	191084	-	CDS	RPE1	YJL121C	sense	190978	191143	165	58	4	116	28	28
chrX	209817	209817	-	3UTR	INT_0_4622	INT_0_4622	sense	209817	209818	1	7	4	0	2	4
chrX	224755	224756	-	SUTs	XUT_10R-84	572432	sense	224755	224757	2	9	4	0	2	4
chrX	224794	224786	-	SUTs	XUT_10R-84	572432	sense	224785	224797	12	35	10	9	9	2.38462
chrX	227927	227917	-	antisense_CDS	INT_0_4634	INT_0_4634	sense	227665	228092	427	5951	383	183	161	160.811
chrX	236741	236741	-	intergenic_region	INT_0_4641	INT_0_4641	sense	236680	236860	180	58	6	144	28	57
chrX	236961	236959	-	intergenic_region	INT_0_4641	INT_0_4641	sense	236917	236977	60	60	18	15	12	29.5
chrX	280024	280026	-	CUTs	CUT685	ST5473	sense	280019	280099	80	48	8	52	19	47
chrX	293933	293937	-	CDS	PRY3	YJL078C	sense	293915	294080	165	59	4	134	29	7.25
chrX	316928	316930	-	antisense_CDS	INT_0_4690	INT_0_4690	sense	316900	316957	57	39	7	31	17	2.375
chrX	317014	317014	-	XUTs	XUT_10R-114	572437	sense	317014	317043	29	30	5	17	13	2.33333
chrX	337105	337105	-	CUTs	CUT689	ST5493	sense	337038	337202	164	37	4	121	22	36
chrX	349106	348958	-	CDS	UBX6	YJL048C	sense	348513	349148	635	4803	426	462	344	62.3636
chrX	349192	349192	-	snoRNA	SNR60	snR60	sense	349171	349214	43	13	4	28	6	12
chrX	349305	349304	-	snoRNA_300_nt_upstream	YJL047C-A	YJL047C-A	sense	349284	349353	69	938	342	5	6	187.4
chrX	361081	361081	-	XUTs	XUT_10R-136	572444	sense	361014	361083	69	20	5	40	8	4
chrX	424596	424596	-	tRNA_100_nt_upstream	INT_0_4783	INT_0_4783	sense	424596	424599	3	5	4	2	2	4
chrX	434830	434831	-	SUTs	SUT636	ST5519	sense	434811	434847	36	48	12	3	5	47
chrX	442673	442673	-	3UTR	INT_0_4794	INT_0_4794	sense	442670	442688	18	80	28	3	5	3.95
chrX	442753	442752	-	3UTR	INT_0_4794	INT_0_4794	sense	442752	442758	6	12	5	2	3	5.5
chrX	442763	442762	-	3UTR	INT_0_4794	INT_0_4794	sense	442761	442763	2	12	7	0	2	5
chrX	450419	450424	-	CUTs	CUT691	ST5523	sense	450235	450477	242	82	5	169	45	81
chrX	461600	461600	-	XUTs	XUT_10R-181	572448	sense	461600	461609	9	9	4	5	4	8
chrX	496980	496979	-	5UTR	RAV1	YJR033C	sense	496979	496981	2	10	5	0	2	9
chrX	535034	535034	-	CUTs	XUT_10R-203	572451	sense	534890	535086	196	59	10	136	32	11.6
chrX	535358	535358	-	CUTs	XUT_10R-203	572451	sense	535338	535400	62	21	4	44	11	20
chrX	620146	620075	-	XUTs	XUT_10R-242	572459	sense	619937	620146	209	71	6	137	41	3.42105
chrX	649278	649290	-	intergenic_region	INT_0_4953	INT_0_4953	sense	649265	649291	26	13	5	20	4	4.33333
chrX	650731	650738	-	CUTs	CUT699	ST5593	sense	650700	650794	94	41	4	47	17	13.3333
chrX	717195	717195	-	intergenic_region	INT_0_4993	INT_0_4993	sense	717195	717196	1	5	4	0	2	4
chrX	717465	717465	-	intergenic_region	INT_0_4993	INT_0_4993	sense	717459	717491	32	12	4	25	6	11
chrX	717617	717617	-	CUTs	CUT700	ST5610	sense	717589	717642	53	9	4	42	5	8
chrX	717826	717826	-	CUTs	CUT700	ST5610	sense	717823	717827	4	11	5	1	3	11
chrXVI	40030	40030	-	antisense_CDS	INT_0_8416	INT_0_8416	sense	40015	40088	73	49	6	44	15	2.66667
chrXVI	55983	55979.2	-	5UTR	THI21	YPL258C	sense	55886	56001	115	59	7	77	27	58
chrXVI	56024	56024	-	5UTR	THI21	YPL258C	sense	56023	56055	32	17	4	18	7	16
chrXVI	56336	56336.2	-	tRNA_100_nt_upstream	INT_0_8436	INT_0_8436	sense	56331	56348	17	65	18	4	6	31.5
chrXVI	74682	74682	-	CDS	ICY2	YPL250C	sense	74594	74711	117	47	4	69	27	46
chrXVI	75488	75488	-	intergenic_region	INT_0_8449	INT_0_8449	sense	75488	75492	4	9	7	1	2	8
chrXVI	105654	105652	-	CUTs	CUT879	ST6996	sense	105624	105744	120	157	14	58	37	155
chrXVI	105767	105767	-	CUTs	CUT879	ST6996	sense	105767	105863	96	42	8	60	18	2.92857
chrXVI	107773	107821	-	CUTs	CUT880	ST6997	sense	107654	108059	405	217	8	226	95	216
chrXVI	117768	117768	-	CUTs	CUT881	ST7000	sense	117732	117839	107	47	4	64	23	23
chrXVI	128396	128396	-	3UTR	INT_0_8487	INT_0_8487	sense	128394	128398	4	11	4	2	4	4.5
chrXVI	131776	131670	-	CUTs	CUT882	ST7005	sense	131473	131962	489	278	10	347	127	277
chrXVI	163805	163807	-	CUTs	CUT886	ST7017	sense	163804	163810	6	29	8	3	5	27
chrXVI	190968	190950	-	CUTs	INT_0_8539	INT_0_8539	sense	190819	190998	179	143	7	103	51	5.83333
chrXVI	204966	204955	-	CUTs	CUT890	ST7031	sense	204931	204990	59	40	7	50	16	39
chrXVI	205163	205174	-	intergenic_region	INT_0_8554	INT_0_8554	sense	205163	205194	31	17	4	22	5	15
chrXVI	215892	215892	-	3UTR	INT_0_8562	INT_0_8562	sense	215892	215893	1	5	5	-1	1	5
chrXVI	256812	256714	-	CDS	PRM4	YPL156C	sense	256626	256813	187	130	18	132	40	2.15517
chrXVI	281060	281058	-	snoRNA_300_nt_downstream	INT_0_8602	INT_0_8602	sense	281039	281069	30	166	34	11	11	82.5
chrXVI	281273	281273	-	snoRNA	SNR17B	snR17b	sense	281230	281295	65	28	4	48	13	27
chrXVI	338984	338985	-	tRNA_100_nt_upstream	XUT_16R-143	573174	sense	338980	339018	38	21	6	26	7	20
chrXVI	352187	352187	-	CDS	SSE1	YPL106C	sense	352075	352233	158	45	4	94	28	43
chrXVI	352703	352703	-	3UTR	INT_0_8657	INT_0_8657	sense	352703	352721	18	8	4	17	3	2.5
chrXVI	443585	443585	-	SUTs	XUT_16R-184	573180	sense	443580	443623	43	37	8	20	14	3.27273
chrXVI	474932	474932	-	3UTR	SSN3	YPL042C	sense	474916	474933	17	6	4	0	2	5
chrXVI	481006	480964	-	antisense_CDS	INT_0_8757	INT_0_8757	sense	480841	481106	265	124	5	162	58	7.23529
chrXVI	504206	504206	-	3UTR	INT_0_8781	INT_0_8781	sense	504206	504208	2	6	4	1	2	4
chrXVI	533421	533421	-	3UTR	INT_0_8798	INT_0_8798	sense	533421	533425	4	5	4	3	2	2
chrXVI	545555	545555	-	antisense_CDS	INT_0_8804	INT_0_8804	sense	545555	545564	9	6	4	0	2	5
chrXVI	565452	565451	-	3UTR	INT_0_8820	INT_0_8820	sense	565447	565452	5	23	13	2	3	3.33333
chrXVI	565543	565543	-	3UTR	INT_0_8820	INT_0_8820	sense	565529	565555	26	9	4	13	4	7
chrXVI	565557	565556	-	3UTR	INT_0_8820	INT_0_8820	sense	565556	565557	1	27	18	0	2	9
chrXVI	613235	613235	-	3UTR	YME1	YPR024W	antisense	613235	613237	2	7	4	1	2	4
chrXVI	622694	622696	-	tRNA_100_nt_upstream	INT_0_8863	INT_0_8863	sense	622690	622707	17	60	18	7	9	59
chrXVI	637242	637242	-	3UTR	INT_0_8867	INT_0_8867	sense	637242	637244	2	11	7	0	2	3
chrXVI	638917	639030	-	CDS	HTS1	YPR033C	sense	638855	639114	259	158	5	175	75	157
chrXVI	644799	644799	-	SUTs	SUT829	ST7171	sense	644653	644801	148	37	4	112	24	35
chrXVI	644844	644844	-	SUTs	SUT829	ST7171	sense	644822	644861	39	23	4	30	13	22
chrXVI	685361	685373	-	CDS	SPE3	YPR069C	sense	685280	685394	114	39	5	81	21	38
chrXVI	694796	694796	-	CDS	TKL1	YPR074C	sense	694755	694808	53	30	4	30	14	29
chrXVI	696992	696973	-	intergenic_region	INT_0_8928	INT_0_8928	sense	696940	697041	101	55	9	84	22	7.71429
chrXVI	718670	718566	-	CDS	YPR091C	YPR091C	sense	718316	718712	396	1750	69	189	139	14.822
chrXVI	718885	718883	-	snoRNA_300_nt_downstream	ASR1	YPR093C	sense	718861	718911	50	443	182	2	4	221
chrXVI	719131	719128	-	snoRNA_300_nt_downstream	ASR1	YPR093C	sense	719085	719171	86	4301	1120	7	9	2150
chrXVI	719294	719293	-	snoRNA_300_nt_upstream	ASR1	YPR093C	sense	719271	719331	60	332	113	6	6	331
chrXVI	752675	752675	-	antisense_CDS	INT_0_8972	INT_0_8972	sense	752651	752753	102	44	4	74	22	42
chrXVI	752830	752830	-	CUTs	CUT912	ST7212	sense	752775	752898	123	41	4	56	19	40
chrXVI	775903	775903	-	tRNA_100_nt_upstream	INT_0_8986	INT_0_8986	sense	775900	775909	9	15	4	7	5	13
chrXVI	785709	785709	-	3UTR	INT_0_8994	INT_0_8994	sense	785709	785711	2	6	4	1	2	4
chrXVI	828342	828342	-	intergenic_region	INT_0_9034	INT_0_9034	sense	828213	828356	143	38	6	86	17	37
chrXVI	834075	834070	-	CUTs	CUT917	ST7239	sense	834065	834124	59	41	6	44	20	40
chrXVI	874581	874564	-	CUTs	INT_0_9061	INT_0_9061	sense	874473	874720	247	125	8	144	50	124
chrXVI	877988	877974	-	SUTs	SUT844	ST7250	sense	877949	878030	81	46	5	60	19	45
chrXVI	878122	878122	-	CUTs	CUT920	ST7251	sense	878053	878131	78	47	4	40	24	46
chrXVI	878233	878234	-	CUTs	CUT920	ST7251	sense	878170	878338	168	152	13	98	56	151
chrXVI	880433	880433	-	tRNA_100_nt_upstream	INT_0_9070	INT_0_9070	sense	880431	880445	14	13	5	11	4	11
chrXVI	882920	882920	-	3UTR	YPR170C	YPR170C	sense	882916	882927	11	43	11	5	7	41
chrXVI	909507	909507	-	intergenic_region	INT_0_9092	INT_0_9092	sense	909504	909509	5	6	4	1	2	5
chrXVI	916983	916983	-	3UTR	INT_0_9098	INT_0_9098	sense	916983	916984	1	4	4	0	2	4
chrV	15435	15435	-	CUTs	CUT541	ST4488	sense	15435	15454	19	14	4	7	5	13
chrV	15686	15613.8	-	CUTs	CUT541	ST4488	sense	15482	15771	289	511	21	144	96	169.667
chrV	51689	51689	-	intergenic_region	INT_0_2564	INT_0_2564	sense	51601	51701	100	20	4	78	14	19
chrV	52118	52030.6	-	intergenic_region	INT_0_2564	INT_0_2564	sense	51723	52136	413	2329	431	256	169	61.2632
chrV	58766	58774	-	antisense_CDS	INT_0_2571	INT_0_2571	sense	58742	58818	76	25	4	70	13	24
chrV	68740	68740	-	3UTR	GLY1	YEL046C	sense	68738	68806	68	28	4	59	15	27
chrV	100247	100248	-	intergenic_region	INT_0_2607	INT_0_2607	sense	100244	100324	80	59	10	17	13	2.7619
chrV	101362	101353	-	intergenic_region	INT_0_2607	INT_0_2607	sense	101323	101427	104	40	6	73	20	7.6
chrV	117380	117380	-	CDS	YEL020C-B	YEL020C-B	sense	117318	117403	85	49	6	51	26	48
chrV	117663	117666	-	intergenic_region	INT_0_2616	INT_0_2616	sense	117635	117767	132	560	137	40	35	69.625
chrV	117856	117856	-	ncRNA	RPR1	RPR1	sense	117812	117871	59	24	4	39	11	23
chrV	117903	117898	-	ncRNA	RPR1	RPR1	sense	117894	117908	14	48	8	11	10	45
chrV	118022	118022	-	ncRNA	RPR1	RPR1	sense	117947	118030	83	18	4	80	10	16
chrV	140201	140201	-	5UTR	GCN4	YEL009C	sense	140200	140288	88	55	8	49	28	54
chrV	152085	152085	-	intergenic_region	INT_0_2652	INT_0_2652	sense	152077	152133	56	34	4	49	18	16
chrV	160433	160433	-	intergenic_region	INT_0_2658	INT_0_2658	sense	160414	160446	32	12	4	25	5	4.5
chrV	167005	167005	-	CUTs	CUT549	ST4536	sense	166978	167014	36	14	4	15	5	13
chrV	167323	167330	-	CUTs	CUT549	ST4536	sense	167317	167351	34	120	16	25	18	119
chrV	178191	178204	-	antisense_CDS	INT_0_2674	INT_0_2674	sense	178009	178257	248	102	5	175	59	100
chrV	211784	211784	-	CDS	MIG3	YER028C	sense	211704	211836	132	37	4	92	21	36
chrV	221737	221737	-	intergenic_region	INT_0_2710	INT_0_2710	sense	221712	221777	65	35	7	46	17	34
chrV	222556	222556	-	CUTs	CUT551	ST4554	sense	222556	222595	39	32	5	34	19	15.5
chrV	225171	225164	-	CDS	ARB1	YER036C	sense	225057	225226	169	98	7	90	43	97
chrV	268036	268054	-	CDS	FCY2	YER056C	sense	267952	268175	223	79	4	130	39	15.6
chrV	272006	272044	-	antisense_CDS	INT_0_2753	INT_0_2753	sense	271938	272116	178	91	5	114	45	90
chrV	281517	281519	-	intergenic_region	INT_0_2762	INT_0_2762	sense	281510	281524	14	22	6	6	7	21
chrV	281597	281597	-	CUTs	CUT557	ST4583	sense	281595	281616	21	20	7	19	8	17
chrV	288584	288584	-	tRNA_100_nt_upstream	INT_0_2770	INT_0_2770	sense	288582	288588	6	13	5	2	4	12
chrV	302274	302304	-	CDS	YER071C	YER071C	sense	302210	302358	148	43	4	116	21	42
chrV	302390	302390	-	5UTR	CUT560	ST4590	sense	302390	302416	26	12	4	7	6	11
chrV	302453	302453	-	CUTs	CUT560	ST4590	sense	302453	302462	9	6	5	-1	1	5
chrV	303027	303047	-	CUTs	CUT561	ST4591	sense	303007	303116	109	41	5	79	22	39
chrV	303154	303154	-	CUTs	CUT561	ST4591	sense	303137	303158	21	10	4	17	6	9
chrV	319519	319519	-	CUTs	XUT_5R-151	572016	sense	319450	319559	109	29	4	84	18	13.5
chrV	332376	332376	-	3UTR	SBH1	YER087C-B	sense	332376	332389	13	11	9	-1	1	2
chrV	409275	409276	-	CUTs	CUT564	ST4623	sense	409222	409303	81	29	4	61	13	27
chrV	416200	416244	-	CUTs	CUT566	ST4626	sense	416078	416352	274	173	6	148	76	86
chrV	425072	425072	-	3UTR	INT_0_2879	INT_0_2879	antisense	425072	425073	1	4	4	-1	1	4
chrV	431130	431127	-	snoRNA_300_nt_downstream	INT_0_2881	INT_0_2881	sense	431028	431212	184	1873	533	6	8	312
chrV	431321	431322	-	snoRNA_300_nt_upstream	CUT567	ST4630	sense	431271	431346	75	90	20	19	16	9.88889
chrV	432646	432631	-	antisense_CDS	INT_0_2884	INT_0_2884	sense	432496	432695	199	107	9	156	57	106
chrV	432731	432731	-	CUTs	CUT568	ST4631	sense	432720	432755	35	16	4	14	8	15
chrV	438811	438811	-	intergenic_region	INT_0_2892	INT_0_2892	sense	438796	438845	49	23	8	24	9	22
chrV	438984	438984	-	intergenic_region	INT_0_2892	INT_0_2892	sense	438896	438992	96	34	6	60	19	33
chrV	462434	462434	-	CDS	YER145C-A	YER145C-A	sense	462434	462435	1	4	4	-1	1	4
chrV	509786	509732	-	CUTs	CUT570	ST4651	sense	509708	509807	99	68	8	59	24	2.09375
chrV	525849	525849	-	intergenic_region	INT_0_2955	INT_0_2955	sense	525849	525850	1	12	8	0	2	8
chrV	540357	540357	-	CDS	TMT1	YER175C	sense	540357	540361	4	5	4	3	2	4
chrV	544779	544727	-	CUTs	CUT571	ST4660	sense	544600	544805	205	190	11	138	63	189
chrV	544899	544899	-	CUTs	CUT571	ST4660	sense	544827	545016	189	55	5	141	29	54
chrV	561327	561327	-	3UTR	YER186C	YER186C	sense	561327	561331	4	7	5	1	2	3
chrV	565495	565496	-	intergenic_region	INT_0_2987	INT_0_2987	sense	565475	565514	39	18	6	20	6	17
chrV	568867	568867	-	intergenic_region	INT_0_2991	INT_0_2991	sense	568867	568868	1	5	5	0	2	5
chrXV	5358	5358	-	XUTs	XUT_15R-7	573007	sense	5358	5383	25	12	4	18	5	3.66667
chrXV	39502	39502	-	SUTs	XUT_15R-33	573013	sense	39502	39505	3	5	4	2	2	2
chrXV	79473	79473	-	CDS	YGK3	YOL128C	sense	79424	79474	50	27	4	35	15	26
chrXV	94157	94158.1	-	intron	YOL120C_intron	intergenic	sense	94151	94196	45	413	136	5	7	103
chrXV	136062	136066	-	snoRNA_300_nt_downstream	YOL098C	YOL098C	sense	135763	136092	329	8495	2186	22	24	303.321
chrXV	136262	136262	-	snoRNA_300_nt_upstream	INT_0_7667	INT_0_7667	sense	136247	136275	28	162	92	1	3	53.6667
chrXV	159393	159393	-	CUTs	CUT826	ST6675	sense	159357	159398	41	22	4	18	10	5.25
chrXV	159535	159535	-	3UTR	ADH1	YOL086C	sense	159535	159536	1	4	4	-1	1	4
chrXV	167508	167502	-	intergenic_region	INT_0_7691	INT_0_7691	sense	167473	167513	40	55	10	24	15	53
chrXV	202653	202653	-	3UTR	INT_0_7714	INT_0_7714	sense	202653	202654	1	4	4	-1	1	4
chrXV	231851	231851	-	3UTR	INT_0_7736	INT_0_7736	sense	231851	231853	2	15	13	-1	1	4.66667
chrXV	234344	234344	-	CUTs	CUT831	ST6698	sense	234243	234401	158	57	4	110	39	56
chrXV	267719	267724	-	intergenic_region	INT_0_7768	INT_0_7768	sense	267542	267762	220	52	4	161	31	51
chrXV	303328	303328	-	intergenic_region	INT_0_7793	INT_0_7793	sense	303328	303329	1	6	4	0	2	4
chrXV	310866	310853	-	3UTR	INT_0_7798	INT_0_7798	sense	310853	310866	13	21	10	10	6	2.75
chrXV	324318	324318	-	CDS	IZH2	YOL002C	sense	324274	324328	54	12	4	32	7	11
chrXV	326093	326093	-	XUTs	INT_0_7810	INT_0_7810	sense	326079	326097	18	10	4	13	5	4.5
chrXV	338625	338624	-	5UTR	TSR3	YOR006C	sense	338620	338636	16	29	11	7	5	2.54545
chrXV	363861	363837	-	CUTs	CUT834	ST6732	sense	363644	363949	305	101	7	191	53	20
chrXV	407923	407846	-	CUTs	CUT839	ST6751	sense	407380	408097	717	7145	740	218	204	26.2647
chrXV	409715	409466	-	5UTR	YOR041C	YOR041C	sense	408987	409738	751	816	15	566	289	40.7
chrXV	409767	409767	-	snoRNA	YOR041C	YOR041C	sense	409760	409780	20	160	52	9	7	2.03846
chrXV	409922	409922	-	snoRNA_300_nt_upstream	YOR041C	YOR041C	sense	409909	409942	33	659	235	2	4	328.5
chrXV	421817	421816	-	intergenic_region	INT_0_7897	INT_0_7897	sense	421809	421825	16	22	7	5	6	21
chrXV	463748	463745	-	intergenic_region	INT_0_7932	INT_0_7932	sense	463739	463789	50	30	6	23	14	29
chrXV	479555	479555	-	CDS	YOR082C	YOR082C	sense	479523	479615	92	29	5	46	17	28
chrXV	483936	483936	-	CDS	TCB1	YOR086C	sense	483935	483960	25	16	7	22	6	15
chrXV	522274	522286	-	SUTs	XUT_15R-249	573051	sense	522182	522361	179	144	7	97	48	143
chrXV	538573	538573	-	3UTR	INT_0_7988	INT_0_7988	sense	538573	538574	1	4	4	-1	1	4
chrXV	552026	552026	-	CDS	YOR121C	YOR121C	sense	552026	552034	8	7	5	4	2	3
chrXV	577716	577716	-	intergenic_region	INT_0_8015	INT_0_8015	sense	577716	577728	12	9	5	9	4	2.66667
chrXV	601005	600999	-	intergenic_region	INT_0_8031	INT_0_8031	sense	600991	601019	28	22	5	13	7	3.5
chrXV	605280	605279	-	3UTR	PNO1	YOR145C	sense	605279	605280	1	13	9	0	2	4
chrXV	618600	618598	-	5UTR	YOR152C	YOR152C	sense	618593	618622	29	48	7	15	13	47
chrXV	680569	680477	-	CUTs	CUT853	ST6838	sense	680353	680579	226	694	61	172	112	17.7436
chrXV	680669	680668	-	snoRNA_300_nt_downstream	INT_0_8094	INT_0_8094	sense	680662	680684	22	28	7	7	6	27
chrXV	680979	680979	-	snoRNA_300_nt_upstream	INT_0_8096	INT_0_8096	sense	680974	680990	16	24	18	2	2	23
chrXV	689133	689148	-	antisense_CDS	INT_0_8101	INT_0_8101	sense	689111	689255	144	89	5	92	39	4.19048
chrXV	748924	748924	-	CDS	RUD3	YOR216C	sense	748916	748936	20	9	4	18	5	8
chrXV	759307	759187	-	antisense_CDS	INT_0_8142	INT_0_8142	sense	758810	759389	579	3236	225	242	193	215.667
chrXV	769546	769546	-	antisense_CDS	INT_0_8152	INT_0_8152	sense	769541	769609	68	32	6	45	13	31
chrXV	784442	784401	-	CUTs	CUT862	ST6874	sense	784198	784462	264	111	9	179	55	110
chrXV	784486	784486	-	CUTs	CUT862	ST6874	sense	784486	784504	18	8	4	14	4	7
chrXV	820339	820339	-	intergenic_region	INT_0_8195	INT_0_8195	sense	820320	820345	25	11	4	23	6	10
chrXV	841935	841832	-	CDS	YOR277C	YOR277C	sense	841490	841942	452	2107	219	204	131	105.25
chrXV	874490	874490	-	intergenic_region	INT_0_8235	INT_0_8235	sense	874489	874496	7	6	4	5	2	5
chrXV	903518	903518	-	XUTs	XUT_15R-399	573068	sense	903490	903533	43	17	4	13	9	16
chrXV	923128	923128	-	3UTR	FRT1	YOR324C	sense	923128	923129	1	8	7	-1	1	7
chrXV	944173	944173	-	antisense_CDS	INT_0_8285	INT_0_8285	sense	944133	944241	108	48	4	70	23	47
chrXV	953621	953617	-	CUTs	CUT869	ST6933	sense	953597	953702	105	56	5	92	28	55
chrXV	978075	978075	-	5UTR	TYE7	YOR344C	sense	977894	978093	199	91	4	157	47	90
chrXV	1027951	1027951	-	SUTs	SUT800	ST6959	sense	1027895	1027970	75	14	4	51	9	2.16667
chrXV	1076120	1076120	-	intergenic_region	INT_0_8385	INT_0_8385	sense	1076088	1076121	33	15	6	28	9	15
chrIII	15279	15279	-	intergenic_region	INT_0_812	INT_0_812	sense	15279	15305	26	10	4	22	4	9
chrIII	39619	39619	-	3UTR	INT_0_831	INT_0_831	sense	39617	39642	25	23	7	16	9	2.2
chrIII	43553	43553	-	3UTR	INT_0_833	INT_0_833	sense	43553	43562	9	7	4	6	2	3
chrIII	77908	77908	-	CDS	AGP1	YCL025C	sense	77908	77986	78	43	7	58	22	3.23077
chrIII	82596	82597	-	tRNA_100_nt_upstream	INT_0_867	INT_0_867	sense	82590	82604	14	71	16	5	7	69
chrIII	107163	107163	-	CDS	YCL007C	YCL007C	sense	107139	107229	90	48	4	57	23	47
chrIII	107332	107366	-	snoRNA_300_nt_downstream	YCL007C	YCL007C	sense	107285	107482	197	848	44	115	84	29.2069
chrIII	107789	107789	-	snoRNA_300_nt_upstream	INT_0_885	INT_0_885	sense	107783	107803	20	56	26	3	5	55
chrIII	123482	123483	-	tRNA_100_nt_downstream	INT_0_904	INT_0_904	sense	123476	123541	65	74	19	19	11	73
chrIII	124729	124721	-	XUTs	XUT_3R-54	571727	sense	124650	124811	161	95	7	64	32	47
chrIII	142259	142184	-	CDS	YCR015C	YCR015C	sense	141914	142369	455	2755	308	102	92	3.49049
chrIII	168349	168349	-	tRNA	tQ(UUG)C	tQ(UUG)C	sense	168337	168352	15	17	5	12	6	15
chrIII	178501	178503	-	snoRNA_300_nt_downstream	CUT466	ST3983	sense	178306	178597	291	3050	420	47	42	169.389
chrIII	216558	216558	-	intergenic_region	INT_0_987	INT_0_987	sense	216558	216559	1	6	4	0	2	4
chrIII	218173	218173	-	3UTR	CTR86	YCR054C	sense	218172	218190	18	8	4	16	4	2.33333
chrIII	224279	224279	-	intergenic_region	INT_0_993	INT_0_993	sense	224275	224281	6	8	4	2	3	3.5
chrIII	224745	224745	-	XUTs	XUT_3R-106	571731	sense	224745	224746	1	6	4	0	2	4
chrIII	228085	228084	-	3UTR	INT_0_996	INT_0_996	sense	228067	228157	90	80	11	38	19	79
chrIII	289465	289465	-	intergenic_region	INT_0_1035	INT_0_1035	sense	289465	289466	1	6	6	-1	1	6
chrIII	298542	298557	-	CDS	GIT1	YCR098C	sense	298502	298608	106	52	6	39	22	51
chrIII	300598	300598	-	3UTR	XUT_3R-136	571735	sense	300598	300599	1	7	7	-1	1	7
chrVII	55931	55927.5	-	CDS	MTO1	YGL236C	sense	55601	56162	561	726	16	242	156	60.4167
chrVII	72295	72295	-	antisense_CDS	INT_0_3239	INT_0_3239	sense	72283	72307	24	24	5	13	9	2.55556
chrVII	73963	73967.3	-	tRNA_100_nt_upstream	INT_0_3244	INT_0_3244	sense	73953	74032	79	157	27	31	19	39
chrVII	94417	94413.5	-	CUTs	CUT586	ST4765	sense	94285	94629	344	492	24	110	92	49.1
chrVII	97052	97052	-	SUTs	SUT536	ST4767	sense	97052	97066	14	6	4	0	2	5
chrVII	131067	131075	-	CUTs	XUT_7R-63	572154	sense	131050	131188	138	94	6	87	36	46
chrVII	144262	144262	-	intergenic_region	INT_0_3291	INT_0_3291	sense	144256	144273	17	37	18	4	5	36
chrVII	148113	148113	-	intergenic_region	INT_0_3295	INT_0_3295	sense	148113	148114	1	7	5	0	2	5
chrVII	163288	163287	-	3UTR	INT_0_3309	INT_0_3309	sense	163287	163306	19	15	6	9	4	2.33333
chrVII	164940	164940	-	CDS	TOS3	YGL179C	sense	164940	164943	3	8	5	0	2	7
chrVII	165636	165636	-	SUTs	SUT539	ST4788	sense	165636	165639	3	6	4	0	2	5
chrVII	166832	166832	-	intergenic_region	INT_0_3312	INT_0_3312	sense	166831	166833	2	5	4	0	2	5
chrVII	209953	209984	-	CUTs	INT_0_3334	INT_0_3334	sense	209943	210046	103	48	7	63	23	7.83333
chrVII	260228	260228	-	antisense_CDS	INT_0_3372	INT_0_3372	sense	260209	260229	20	11	4	3	4	4.5
chrVII	274686	274686	-	3UTR	MON1	YGL124C	sense	274686	274695	9	10	5	7	4	2.25
chrVII	276775	276802	-	5UTR	CUT593	ST4816	sense	276764	276920	156	86	6	87	39	85
chrVII	286841	286841	-	intergenic_region	INT_0_3391	INT_0_3391	sense	286826	286848	22	14	4	18	7	13
chrVII	287254	287255	-	tRNA_100_nt_downstream	INT_0_3394	INT_0_3394	sense	287232	287293	61	68	8	19	18	8.375
chrVII	337275	337270	-	CUTs	CUT596	ST4830	sense	337184	337388	204	71	5	115	37	70
chrVII	343075	343086	-	5UTR	NBP35	YGL091C	sense	343073	343119	46	45	8	43	17	44
chrVII	344424	344424	-	antisense_CDS	INT_0_3434	INT_0_3434	sense	344417	344441	24	32	5	13	10	31
chrVII	344610	344613	-	intergenic_region	INT_0_3434	INT_0_3434	sense	344519	344630	111	176	15	59	33	58.3333
chrVII	345183	345183	-	intergenic_region	INT_0_3436	INT_0_3436	sense	345183	345204	21	22	8	4	5	5.25
chrVII	365141	365113	-	snoRNA_300_nt_downstream	RPL7A	YGL076C	sense	364963	365183	220	4227	1372	118	75	352.167
chrVII	365281	365281	-	snoRNA_300_nt_upstream	YGL076C_intron	intergenic	sense	365268	365377	109	39	4	83	20	38
chrVII	365430	365432	-	snoRNA_300_nt_upstream	YGL076C_intron	intergenic	sense	365412	365482	70	41	6	39	14	40
chrVII	366262	366266	-	snoRNA_300_nt_downstream	INT_0_3455	INT_0_3455	sense	366035	366414	379	7628	1730	12	14	155.653
chrVII	366570	366568	-	snoRNA_300_nt_upstream	INT_0_3456	INT_0_3456	sense	366513	366625	112	420	77	10	12	7.46429
chrVII	370511	370511	-	CUTs	CUT599	ST4844	sense	370454	370573	119	33	4	76	19	32
chrVII	370600	370600	-	CUTs	CUT599	ST4844	sense	370597	370607	10	24	5	6	6	2.5
chrVII	412436	412437	-	tRNA_100_nt_upstream	INT_0_3496	INT_0_3496	sense	412428	412471	43	47	10	17	14	46
chrVII	515826	515829	-	CUTs	CUT603	ST4888	sense	515738	515866	128	59	5	63	28	58
chrVII	515968	515947	-	CUTs	CUT603	ST4888	sense	515890	516067	177	113	10	99	45	112
chrVII	524996	524996	-	5UTR	YGR018C	YGR018C	sense	524991	524999	8	6	4	2	2	5
chrVII	535068	535057	-	CUTs	XUT_7R-243	572183	sense	534939	535203	264	129	7	157	59	7.11111
chrVII	544272	544273	-	SUTs	XUT_7R-245	572184	sense	544202	544355	153	66	5	101	32	2.73913
chrVII	559323	559323	-	intergenic_region	INT_0_3613	INT_0_3613	sense	559323	559324	1	4	4	-1	1	4
chrVII	568691	568691	-	intergenic_region	INT_0_3619	INT_0_3619	sense	568691	568692	1	4	4	-1	1	4
chrVII	608654	608672	-	CUTs	CUT609	ST4914	sense	608593	608709	116	94	5	63	39	93
chrVII	656307	656235	-	antisense_CDS	INT_0_3686	INT_0_3686	sense	656135	656376	241	168	6	167	67	3.47917
chrVII	667393	667384	-	CUTs	CUT611	ST4935	sense	667232	667652	420	119	5	302	68	118
chrVII	702287	702280	-	CUTs	XUT_7R-315	572197	sense	702048	702368	320	126	7	185	58	125
chrVII	732966	732966	-	5UTR	MEP1	YGR121C	sense	732961	732989	28	25	5	20	9	2.66667
chrVII	739327	739323	-	intergenic_region	INT_0_3751	INT_0_3751	sense	739215	739418	203	230	53	77	38	229
chrVII	781376	781376	-	SUTs	INT_0_3786	INT_0_3786	sense	781376	781387	11	14	4	8	5	2
chrVII	795530	795530	-	5UTR	INT_0_3802	INT_0_3802	antisense	795529	795533	4	9	4	3	4	7
chrVII	801624	801624	-	SUTs	XUT_7R-365	572206	sense	801531	801646	115	40	6	70	18	39
chrVII	808354	808353	-	intergenic_region	INT_0_3815	INT_0_3815	sense	808353	808354	1	15	9	0	2	6
chrVII	809399	809399	-	CDS	RTS3	YGR161C	sense	809398	809406	8	10	6	6	3	3
chrVII	848490	848490	-	5UTR	ERG1	YGR175C	sense	848490	848495	5	7	5	0	2	3
chrVII	857555	857555	-	tRNA_100_nt_upstream	INT_0_3853	INT_0_3853	sense	857552	857562	10	13	4	6	6	12
chrVII	858583	858583	-	CDS	YGR182C	YGR182C	sense	858583	858597	14	13	4	8	5	2
chrVII	879159	879146	-	3UTR	YGR190C	YGR190C	sense	879055	879210	155	136	10	135	55	135
chrVII	879256	879256	-	3UTR	YGR190C	YGR190C	sense	879232	879297	65	22	6	24	10	21
chrVII	904596	904601	-	CDS	PCT1	YGR202C	sense	904490	904645	155	60	5	112	32	59
chrVII	939468	939484	-	snRNA	SNR7-L	snR7-L	sense	939454	939535	81	75	11	52	18	72
chrVII	958566	958580	-	intergenic_region	INT_0_3930	INT_0_3930	sense	958536	958681	145	90	8	110	35	11.125
chrVII	1023336	1023336	-	antisense_CDS	INT_0_3976	INT_0_3976	sense	1023336	1023349	13	7	4	12	3	5
chrVII	1057241	1057241	-	antisense_CDS	INT_0_3993	INT_0_3993	sense	1057241	1057242	1	4	4	-1	1	4
chrVII	1071868	1071868	-	intergenic_region	INT_0_4005	INT_0_4005	sense	1071855	1071869	14	7	6	0	2	7
chrXI	24136	24130	-	SUTs	XUT_11R-12	572526	sense	24092	24163	71	70	19	24	15	4.3125
chrXI	55848	55848	-	intergenic_region	INT_0_5049	INT_0_5049	sense	55847	55851	4	10	4	2	4	3
chrXI	95967	95967.4	-	CUTs	CUT703	ST5643	sense	95799	96102	303	160	7	158	68	158
chrXI	112938	112940	-	3UTR	INT_0_5085	INT_0_5085	sense	112914	112974	60	340	121	3	5	18.8333
chrXI	113023	113023	-	3UTR	INT_0_5085	INT_0_5085	sense	113011	113026	15	16	7	3	5	7
chrXI	127027	127027	-	SUTs	SUT659	ST5649	sense	127012	127040	28	21	9	13	8	2.5
chrXI	157626	157626	-	XUTs	XUT_11R-63	572531	sense	157553	157632	79	31	7	41	14	30
chrXI	157678	157678	-	XUTs	XUT_11R-63	572531	sense	157661	157754	93	24	5	59	13	11.5
chrXI	164295	164274	-	3UTR	GPM1	YKL152C	sense	164164	164325	161	128	11	97	41	127
chrXI	164357	164361	-	3UTR	GPM1	YKL152C	sense	164349	164380	31	50	5	17	15	23.5
chrXI	165933	165936	-	5UTR	YKL151C	YKL151C	sense	165933	165952	19	15	4	7	5	4.66667
chrXI	203107	203108	-	intergenic_region	INT_0_5155	INT_0_5155	sense	203096	203132	36	33	6	15	11	32
chrXI	224606	224606	-	intergenic_region	INT_0_5172	INT_0_5172	sense	224606	224609	3	6	5	-1	1	5
chrXI	245808	245809	-	intergenic_region	INT_0_5187	INT_0_5187	sense	245804	245844	40	105	35	3	5	104
chrXI	259966	259966	-	SUTs	SUT664	ST5696	sense	259959	259988	29	15	4	21	6	13
chrXI	286162	286144	-	CUTs	CUT711	ST5707	sense	286120	286185	65	38	5	46	18	6.16667
chrXI	308953	308953	-	SUTs	SUT671	ST5715	sense	308953	308960	7	5	4	6	2	4
chrXI	338646	338646	-	CDS	DEF1	YKL054C	sense	338537	338706	169	51	5	118	31	6
chrXI	430750	430791	-	intron	YKL006C-A_intron	intergenic	sense	430407	430951	544	612	22	348	160	50.9167
chrXI	431034	431019	-	snoRNA_300_nt_downstream	INT_0_5332	INT_0_5332	sense	430972	431148	176	174	23	94	34	86.5
chrXI	431222	431222	-	snoRNA_300_nt_upstream	INT_0_5333	INT_0_5333	sense	431191	431235	44	942	363	1	3	94.1
chrXI	436799	436799	-	intergenic_region	INT_0_5337	INT_0_5337	sense	436796	436800	4	7	4	2	2	7
chrXI	454147	454147	-	3UTR	RSC4	YKR008W	antisense	454147	454187	40	10	4	39	6	2
chrXI	462938	462939	-	intergenic_region	INT_0_5357	INT_0_5357	sense	462931	462942	11	21	4	7	7	6.33333
chrXI	468895	468895	-	intergenic_region	INT_0_5362	INT_0_5362	sense	468892	468940	48	30	4	20	12	29
chrXI	513467	513465	-	tRNA_100_nt_upstream	INT_0_5392	INT_0_5392	sense	513464	513474	10	74	29	6	8	2.25
chrXI	514057	514057	-	SUTs	XUT_11R-223	572559	sense	514053	514094	41	68	23	15	10	67
chrXI	554269	554279	-	CUTs	CUT723	ST5804	sense	554210	554338	128	84	6	83	39	20.5
chrXI	556654	556664	-	antisense_CDS	INT_0_5422	INT_0_5422	sense	556581	556781	200	151	23	91	40	75
chrXI	557040	557049	-	CUTs	CUT724	ST5805	sense	557008	557189	181	79	5	94	35	38.5
chrXI	558565	558565	-	CUTs	CUT725	ST5806	sense	558536	558577	41	11	4	18	6	10
chrXI	558996	558919	-	antisense_CDS	CUT725	ST5806	sense	558626	559031	405	3037	183	188	172	92
chrXI	608775	608775	-	intergenic_region	INT_0_5470	INT_0_5470	sense	608775	608790	15	12	5	7	4	5.5
chrXI	625291	625291	-	antisense_CDS	INT_0_5478	INT_0_5478	sense	625137	625296	159	44	4	112	24	43
chrXI	626245	626245	-	intergenic_region	INT_0_5478	INT_0_5478	sense	626245	626246	1	4	4	-1	1	4
chrIV	22072	22072	-	CUTs	XUT_4R-9	571861	sense	22005	22153	148	45	5	76	26	43
chrIV	125319	125319	-	intergenic_region	INT_0_1140	INT_0_1140	sense	125303	125357	54	14	4	38	6	12
chrIV	125587	125587	-	CDS	YDL187C	YDL187C	sense	125575	125593	18	21	7	10	7	3
chrIV	125607	125607	-	CDS	YDL187C	YDL187C	sense	125607	125624	17	8	4	16	4	3
chrIV	137536	137547	-	antisense_CDS	INT_0_1150	INT_0_1150	sense	137505	137614	109	73	4	76	34	5.53846
chrIV	144224	144224	-	intergenic_region	INT_0_1155	INT_0_1155	sense	144224	144225	1	4	4	-1	1	4
chrIV	215525	215525	-	CUTs	XUT_4R-81	571871	sense	215371	215538	167	61	5	147	37	30
chrIV	215658	215643	-	CUTs	XUT_4R-81	571871	sense	215640	215668	28	41	11	17	9	3.63636
chrIV	221896	221896	-	intergenic_region	INT_0_1212	INT_0_1212	sense	221896	221898	2	6	4	1	2	4
chrIV	247650	247645	-	5UTR	YDL119C	YDL119C	sense	247590	247657	67	40	5	36	15	37
chrIV	247726	247723	-	5UTR	YDL119C	YDL119C	sense	247681	247788	107	79	7	76	33	78
chrIV	292267	292257	-	intergenic_region	INT_0_1261	INT_0_1261	sense	292151	292335	184	103	9	114	46	14
chrIV	301398	301398	-	3UTR	INT_0_1271	INT_0_1271	sense	301398	301401	3	6	5	-1	1	5
chrIV	302371	302370	-	3UTR	YDL085C-A	YDL085C-A	sense	302370	302371	1	10	6	0	2	4
chrIV	312822	312821	-	3UTR	INT_0_1282	INT_0_1282	sense	312818	312833	15	17	5	5	6	2.66667
chrIV	323065	323078	-	snoRNA_300_nt_downstream	INT_0_1289	INT_0_1289	sense	322872	323220	348	2249	114	179	140	42.3962
chrIV	323244	323244	-	snoRNA	SNR63	snR63	sense	323242	323252	10	7	4	7	3	6
chrIV	323572	323570	-	snoRNA_300_nt_upstream	INT_0_1291	INT_0_1291	sense	323530	323614	84	578	252	4	6	115.4
chrIV	345158	345162	-	CUTs	CUT486	ST4119	sense	345106	345188	82	49	5	37	23	48
chrIV	352332	352332	-	CUTs	CUT487	ST4120	sense	352281	352333	52	23	4	22	10	21
chrIV	356881	356881	-	5UTR	PSA1	YDL055C	sense	356793	356902	109	33	4	70	18	32
chrIV	365733	365733	-	CDS	KNH1	YDL049C	sense	365715	365753	38	17	4	25	10	16
chrIV	365813	365814	-	CDS	KNH1	YDL049C	sense	365777	365873	96	85	6	67	30	7
chrIV	370975	370975	-	SUTs	SUT462	ST4129	sense	370975	370991	16	6	5	-1	1	2.5
chrIV	415003	415003	-	3UTR	RPN4	YDL020C	sense	415002	415004	2	7	4	0	2	5
chrIV	416647	416647	-	CDS	RPN4	YDL020C	sense	416596	416660	64	20	4	43	13	19
chrIV	443648	443647	-	intergenic_region	INT_0_1392	INT_0_1392	sense	443592	443656	64	60	14	40	18	4.21429
chrIV	443727	443725	-	XUTs	XUT_4R-190	571883	sense	443712	443753	41	40	7	15	13	7.6
chrIV	470488	470488	-	intergenic_region	INT_0_1411	INT_0_1411	sense	470474	470583	109	46	5	59	17	3.46154
chrIV	488934	488936	-	tRNA_100_nt_upstream	XUT_4R-212	571887	sense	488930	488961	31	76	23	7	9	75
chrIV	524903	524903	-	intergenic_region	INT_0_1452	INT_0_1452	sense	524857	524920	63	57	14	23	14	55
chrIV	541003	541003	-	CDS	YDR042C	YDR042C	sense	540989	541026	37	18	4	21	7	17
chrIV	541603	541536	-	CDS	YDR042C	YDR042C	sense	541106	541673	567	3911	673	209	145	60.1538
chrIV	541739	541741	-	snoRNA_300_nt_upstream	INT_0_1460	INT_0_1460	sense	541736	541744	8	24	6	5	7	21
chrIV	541778	541778	-	snoRNA_300_nt_upstream	INT_0_1460	INT_0_1460	sense	541767	541784	17	613	402	1	2	612
chrIV	556373	556344	-	CDS	TPI1	YDR050C	sense	556085	556455	370	275	12	230	101	274
chrIV	562524	562524	-	5UTR	CDC34	YDR054C	sense	562390	562567	177	57	16	93	24	56
chrIV	578309	578309	-	intergenic_region	INT_0_1494	INT_0_1494	sense	578308	578310	2	6	4	0	2	5
chrIV	598394	598403	-	intergenic_region	INT_0_1511	INT_0_1511	sense	598370	598430	60	59	8	35	19	7.25
chrIV	614183	614186	-	3UTR	INT_0_1524	INT_0_1524	sense	614183	614188	5	16	6	3	5	3.25
chrIV	614190	614190	-	3UTR	INT_0_1524	INT_0_1524	sense	614189	614193	4	13	8	0	2	5.5
chrIV	628758	628758	-	intergenic_region	INT_0_1536	INT_0_1536	sense	628752	628759	7	11	4	4	5	11
chrIV	661041	661041	-	antisense_CDS	INT_0_1552	INT_0_1552	sense	661041	661046	5	7	4	2	2	6
chrIV	703871	703870	-	CUTs	XUT_4R-303	571901	sense	703736	704078	342	326	13	172	91	162.5
chrIV	720653	720653	-	intergenic_region	INT_0_1591	INT_0_1591	sense	720646	720654	8	9	6	3	3	8
chrIV	734417	734417	-	antisense_CDS	INT_0_1602	INT_0_1602	sense	734417	734418	1	4	4	-1	1	4
chrIV	748479	748479	-	3UTR	SWI5	YDR146C	sense	748479	748482	3	6	4	2	2	4
chrIV	751117	751117	-	CUTs	CUT508	ST4251	sense	751092	751128	36	21	6	8	7	20
chrIV	763982	763982	-	3UTR	INT_0_1617	INT_0_1617	sense	763982	763984	2	8	6	0	2	7
chrIV	768325	768325	-	CUTs	CUT509	ST4255	sense	768289	768329	40	23	6	9	7	3.14286
chrIV	768359	768359	-	3UTR	CUT509	ST4255	sense	768358	768361	3	9	6	0	2	8
chrIV	769771	769776	-	CUTs	CUT510	ST4257	sense	769730	769824	94	63	4	59	31	62
chrIV	769855	769857	-	CUTs	CUT510	ST4257	sense	769845	769949	104	41	5	65	18	40
chrIV	784415	784419	-	CUTs	CUT512	ST4261	sense	784275	784564	289	232	15	163	90	115.5
chrIV	802782	802782	-	tRNA	tQ(UUG)D3	tQ(UUG)D3	sense	802765	802783	18	21	4	13	9	21
chrIV	802870	802875	-	tRNA_100_nt_upstream	INT_0_1645	INT_0_1645	sense	802865	802879	14	20	5	12	8	4.25
chrIV	815975	815975	-	antisense_CDS	INT_0_1654	INT_0_1654	sense	815961	815987	26	46	10	16	9	6.42857
chrIV	840302	840302	-	antisense_CDS	INT_0_1672	INT_0_1672	sense	840302	840304	2	9	4	1	3	5
chrIV	892140	892104	-	CUTs	XUT_4R-364	571910	sense	892002	892260	258	169	15	194	68	168
chrIV	907284	907284	-	CDS	YDR220C	YDR220C	sense	907283	907288	5	12	7	1	3	11
chrIV	915858	915858	-	antisense_CDS	INT_0_1720	INT_0_1720	sense	915802	915917	115	38	9	72	19	37
chrIV	981117	981116	-	tRNA_100_nt_upstream	INT_0_1773	INT_0_1773	sense	981114	981123	9	21	6	4	5	20
chrIV	1004528	1004528	-	CUTs	CUT516	ST4314	sense	1004474	1004529	55	25	4	33	14	7.33333
chrIV	1012929	1.01293e+06	-	antisense_CDS	INT_0_1793	INT_0_1793	sense	1012809	1012940	131	45	6	95	24	44
chrIV	1054638	1054637	-	CDS	HDA2	YDR295C	sense	1054637	1054655	18	11	5	0	2	3.33333
chrIV	1078618	1078618	-	3UTR	INT_0_1838	INT_0_1838	sense	1078618	1078638	20	8	4	17	4	3.5
chrIV	1095389	1095389	-	tRNA	tF(GAA)D	tF(GAA)D	sense	1095376	1095412	36	26	6	11	10	25
chrIV	1166229	1.16622e+06	-	CUTs	CUT523	ST4362	sense	1166174	1166265	91	65	12	54	24	31.5
chrIV	1233187	1233187	-	3UTR	YDR379C-A	YDR379C-A	sense	1233185	1233188	3	7	4	0	2	7
chrIV	1266195	1266195	-	3UTR	INT_0_1971	INT_0_1971	sense	1266195	1266214	19	7	5	0	2	6
chrIV	1300430	1300430	-	CUTs	CUT532	ST4410	sense	1300419	1300584	165	43	4	102	26	41
chrIV	1311739	1.31175e+06	-	intergenic_region	INT_0_2001	INT_0_2001	sense	1311738	1311766	28	21	6	22	7	10
chrIV	1321501	1.32151e+06	-	antisense_CDS	INT_0_2012	INT_0_2012	sense	1321391	1321627	236	93	9	163	48	91
chrIV	1325433	1325433	-	3UTR	INT_0_2017	INT_0_2017	sense	1325433	1325438	5	6	4	0	2	5
chrIV	1359061	1.35906e+06	-	intergenic_region	INT_0_2041	INT_0_2041	sense	1359060	1359067	7	10	4	5	3	9
chrIV	1418453	1418453	-	intergenic_region	INT_0_2083	INT_0_2083	sense	1418453	1418456	3	6	4	0	2	5
chrIV	1420267	1420267	-	3UTR	CWC21	YDR482C	sense	1420267	1420270	3	5	4	2	2	2
chrIV	1450017	1450017	-	antisense_CDS	INT_0_2106	INT_0_2106	sense	1450013	1450018	5	10	4	3	4	4.5
chrIV	1462178	1462178	-	3UTR	INT_0_2117	INT_0_2117	sense	1462178	1462179	1	6	5	-1	1	5
chrIV	1468288	1.46829e+06	-	CDS	GNP1	YDR508C	sense	1468265	1468304	39	36	6	12	9	35
chrIV	1476390	1.47645e+06	-	CDS	EMI2	YDR516C	sense	1476379	1476542	163	84	5	122	40	8.3
chrIV	1492455	1.49238e+06	-	5UTR	YDR526C	YDR526C	sense	1492021	1492461	440	788	71	297	164	10.0897
chrIV	1493103	1493102	-	snoRNA_300_nt_upstream	INT_0_2154	INT_0_2154	sense	1493091	1493103	12	31	19	0	2	12
chrVIII	18052	18052	-	intergenic_region	INT_0_4033	INT_0_4033	sense	18052	18068	16	13	4	14	6	2.4
chrVIII	25766	25753.1	-	CDS	YHL037C	YHL037C	sense	25720	25777	57	24	5	30	10	11.5
chrVIII	98819	98819	-	3UTR	SHU1	YHL006C	sense	98819	98832	13	7	4	0	2	6
chrVIII	128263	128263	-	CUTs	XUT_8R-64	572266	sense	128219	128286	67	15	4	53	8	14
chrVIII	168700	168700	-	3UTR	INT_0_4149	INT_0_4149	sense	168700	168702	2	6	4	0	2	2.5
chrVIII	178454	178453	-	antisense_CDS	INT_0_4158	INT_0_4158	sense	178411	178475	64	35	8	38	12	34
chrVIII	208865	208865	-	5UTR	YHR049C-A	YHR049C-A	sense	208847	208912	65	20	4	38	10	19
chrVIII	238081	238080	-	intergenic_region	INT_0_4215	INT_0_4215	sense	238080	238148	68	19	5	42	7	6
chrVIII	242028	242028	-	SUTs	XUT_8R-115	572273	sense	242017	242034	17	7	4	10	3	6
chrVIII	319761	319768	-	CUTs	XUT_8R-157	572282	sense	319747	319822	75	59	5	44	23	58
chrVIII	332560	332560	-	antisense_CDS	INT_0_4273	INT_0_4273	sense	332519	332561	42	15	4	31	8	15
chrVIII	381002	381006	-	CUTs	CUT650	ST5198	sense	380969	381023	54	30	6	35	12	29
chrVIII	381107	381120	-	CUTs	CUT650	ST5198	sense	381091	381172	81	66	8	49	23	63
chrVIII	383332	383332	-	intergenic_region	INT_0_4323	INT_0_4323	sense	383331	383338	7	15	6	5	5	2.6
chrVIII	406612	406612	-	SUTs	SUT591	ST5209	sense	406599	406613	14	14	4	12	7	14
chrVIII	420286	420286	-	3UTR	INT_0_4352	INT_0_4352	sense	420286	420289	3	5	4	2	2	4
chrVIII	450275	450300	-	CUTs	CUT654	ST5219	sense	450218	450373	155	90	6	110	39	22.25
chrVIII	458965	458963	-	intergenic_region	INT_0_4377	INT_0_4377	sense	458948	458970	22	46	12	11	12	11.25
chrVIII	488389	488389	-	3UTR	INT_0_4405	INT_0_4405	sense	488389	488390	1	4	4	-1	1	4

## Sheet: RRP6_FRB_QuantSeq
chromosome	peak coord	center of mass coordinate for cluster	strand	annotation type	gene name	gene ID	strandedness	cluster start	cluster end	cluster width	total cluster reads	peak height (reads)	width around peak accounting for 80.0% of signal	distinct number of three prime ends accounting for 80.0% of signal	fold upregulation
chrII	5878	5878	+	CDS	YBL109W	YBL109W	sense	5878	5901	23	3.04441	2.53701	-1	1	2.79071
chrII	13979	13978	+	intergenic_region	INT_0_223	INT_0_223	sense	13979	13999	20	3.29812	2.53701	8	2	2.79071
chrII	28681	28681	+	3UTR	YBL100W-C	YBL100W-C	sense	28681	28703	22	4.05922	2.28331	19	4	2.64775
chrII	44336	44336	+	antisense_CDS	INT_0_241	INT_0_241	sense	44277	44347	70	5.83513	2.53701	57	8	5.32773
chrII	51900	51900	+	antisense_CDS	INT_0_249	INT_0_249	sense	51855	51958	103	9.89435	2.02961	74	16	9.64065
chrII	79900	79893	+	3UTR	INT_0_257	INT_0_257	antisense	79875	79991	116	91.0787	33.2349	24	17	2.15452
chrII	88083	88082	+	snoRNA_300_nt_upstream	INT_0_264	INT_0_264	sense	88068	88124	56	23.0868	3.29812	29	24	22.8331
chrII	88413	88418	+	snoRNA_1000_nt_downstream	INT_0_265	INT_0_265	sense	88277	88616	339	825.544	37.8015	206	171	143.508
chrII	112857	112857	+	antisense_CDS	INT_0_286	INT_0_286	sense	112838	112864	26	7.61104	4.05922	12	4	7.35734
chrII	117453	117462	+	5UTR	INT_0_289	INT_0_289	sense	117448	117504	56	124.567	80.4233	5	7	3.87283
chrII	169740	169742	+	intergenic_region	INT_0_327	INT_0_327	sense	169660	169848	188	67.4845	15.9832	24	18	67.2308
chrII	171329	171329	+	intergenic_region	INT_0_330	INT_0_330	sense	171321	171336	15	4.31292	2.53701	4	3	4.05922
chrII	227450	227450	+	intergenic_region	INT_0_363	INT_0_363	sense	227195	227464	269	49.218	2.28331	206	82	16.9456
chrII	235201	235227	+	intergenic_region	INT_0_364	INT_0_364	sense	235201	235297	96	105.032	26.1312	38	21	3.63625
chrII	237141	237178	+	3UTR	HTB2	YBL002W	sense	237087	237304	217	704.021	203.215	57	51	2.64442
chrII	244356	244355	+	3UTR	COQ1	YBR003W	sense	244352	244356	4	11.6703	8.87954	0	2	2.79071
chrII	246748	246748	+	3UTR	RCR1	YBR005W	sense	246741	246851	110	10.4018	2.02961	74	16	4.70712
chrII	246926	246923	+	5UTR	UGA2	YBR006W	sense	246912	246943	31	12.1777	4.05922	9	8	11.4166
chrII	254985	254985	+	CUTs	CUT009	ST0108	sense	254985	255002	17	7.10363	2.53701	8	7	2.29472
chrII	257097	257089	+	XUTs	XUT_2F-91	571606	sense	256928	257140	212	38.8163	7.86474	156	31	4.3509
chrII	301947	301947	+	CDS	EDS1	YBR033W	sense	301945	301999	54	5.83513	2.79071	17	5	5.58143
chrII	307044	307045	+	CUTs	CUT012	ST0122	sense	306967	307099	132	35.7719	3.04441	64	31	16.4749
chrII	307411	307411	+	intergenic_region	INT_0_424	INT_0_424	sense	307411	307422	11	9.38695	6.84993	8	4	8.87954
chrII	307646	307646	+	ncRNA	TLC1	TLC1	sense	307640	307675	35	3.55182	2.53701	10	3	3.29812
chrII	308887	308878	+	ncRNA	TLC1	TLC1	sense	308852	308923	71	48.7106	4.56662	56	38	7.61739
chrII	316698	316697	+	3UTR	ATP3	YBR039W	sense	316697	316699	2	9.64065	5.07402	1	3	3.41266
chrII	334206	334206	+	intergenic_region	INT_0_447	INT_0_447	sense	334196	334213	17	6.34253	3.55182	6	2	4.05922
chrII	342715	342715	+	intergenic_region	INT_0_455	INT_0_455	sense	342581	342732	151	18.2665	2.79071	99	26	17.7591
chrII	344495	344494	+	3UTR	YRO2	YBR054W	sense	344472	344541	69	114.927	65.2012	13	13	5.0927
chrII	344602	344616	+	3UTR	YRO2	YBR054W	sense	344568	344661	93	48.9643	6.34253	75	31	7.53139
chrII	350755	350755	+	tRNA_100_nt_upstream	XUT_2F-141	571618	sense	350716	350771	55	7.35734	2.79071	39	9	7.10363
chrII	351905	352152	+	3UTR	YBR056W-A	YBR056W-A	sense	351877	352158	281	343.004	95.3917	38	31	2.80558
chrII	366625	366636	+	CUTs	XUT_2F-146	571621	sense	366312	366737	425	87.5269	12.1777	203	51	15.1805
chrII	373723	373719	+	SUTs	SUT016	ST0142	sense	373718	373743	25	44.144	16.4906	12	10	3.98314
chrII	378658	378658	+	intergenic_region	XUT_2F-154	571624	sense	378621	378740	119	17.7591	5.83513	54	11	3.47991
chrII	379140	379140	+	intergenic_region	INT_0_486	INT_0_486	sense	379047	379141	94	11.924	2.53701	75	14	11.924
chrII	381315	381313	+	3UTR	YBR071W	YBR071W	sense	381313	381315	2	46.4273	29.1756	0	2	2.1182
chrII	382839	382838	+	3UTR	HSP26	YBR072W	sense	382826	382860	34	164.145	91.0787	2	4	8.34366
chrII	395361	395356	+	intergenic_region	INT_0_500	INT_0_500	sense	395293	395423	130	125.582	25.6238	25	24	5.28481
chrII	414200	414223	+	antisense_CDS	INT_0_512	INT_0_512	sense	414145	414226	81	117.717	45.1588	23	13	2.56735
chrII	420172	420176	+	intergenic_region	INT_0_514	INT_0_514	sense	420150	420241	91	16.2369	4.31292	32	11	9.53192
chrII	423723	423711	+	CUTs	CUT024	ST0154	sense	423609	423848	239	67.9919	4.82032	124	73	67.7382
chrII	431687	431775	+	CUTs	XUT_2F-177	571630	sense	431604	431861	257	52.2625	14.7147	122	39	8.68463
chrII	450788	450795	+	3UTR	YMC2	YBR104W	sense	450767	450800	33	23.3405	11.1629	6	5	2.53627
chrII	453586	453605	+	SUTs	SUT017	ST0164	sense	453525	453708	183	241.27	53.2773	22	22	3.81116
chrII	453831	453828	+	SUTs	SUT017	ST0164	sense	453761	453921	160	65.9623	18.2665	106	41	22.8589
chrII	454764	454766	+	5UTR	INT_0_541	INT_0_541	sense	454741	454822	81	92.3473	39.5774	8	10	6.74481
chrII	469636	469636	+	3UTR	RAD16	YBR114W	sense	469636	469683	47	6.84993	2.53701	41	6	2.82427
chrII	477071	477071	+	XUTs	XUT_2F-190	571631	sense	477006	477139	133	10.9092	2.53701	112	16	7.06068
chrII	479257	479254	+	intergenic_region	INT_0_555	INT_0_555	sense	479164	479260	96	23.5942	4.56662	69	18	2.92055
chrII	479376	479384	+	intron	YBR119W_intron	intergenic	sense	479348	479409	61	65.7086	17.5054	15	14	27.0071
chrII	479444	479443	+	CDS	MUD1	YBR119W	sense	479444	479447	3	3.04441	2.28331	1	2	2.79071
chrII	484857	484857	+	antisense_CDS	INT_0_559	INT_0_559	sense	484857	484878	21	3.29812	2.28331	17	3	2.79071
chrII	513743	513743	+	3UTR	YBR137W	YBR137W	sense	513743	513745	2	2.79071	2.53701	-1	1	2.53701
chrII	513842	513842	+	antisense_CDS	INT_0_578	INT_0_578	sense	513831	513901	70	8.87954	2.02961	50	12	7.20189
chrII	536505	536528	+	5UTR	RTC2	YBR147W	sense	536478	536553	75	10.148	3.80552	37	8	8.26099
chrII	537885	537885	+	3UTR	YSW1	YBR148W	sense	537880	537894	14	4.82032	3.80552	4	2	4.56662
chrII	541271	541274	+	antisense_CDS	INT_0_595	INT_0_595	sense	541249	541318	69	16.4906	8.37214	14	7	6.77825
chrII	541465	541465	+	antisense_CDS	INT_0_595	INT_0_595	sense	541459	541475	16	3.29812	2.02961	13	4	3.04441
chrII	546205	546205	+	3UTR	APD1	YBR151W	sense	546164	546219	55	25.8775	8.62584	8	9	4.27877
chrII	556420	556420	+	5UTR	AMN1	YBR158W	sense	556420	556456	36	5.32773	2.79071	9	6	4.82032
chrII	558402	558402	+	intergenic_region	INT_0_606	INT_0_606	sense	558402	558418	16	5.32773	4.05922	1	2	4.02459
chrII	567861	567854	+	intergenic_region	INT_0_612	INT_0_612	sense	567821	567877	56	7.10363	2.53701	36	7	6.59623
chrII	579116	579176	+	3UTR	SEC66	YBR171W	sense	579113	579189	76	28.6682	8.62584	59	19	2.57868
chrII	584856	584842	+	antisense_CDS	INT_0_628	INT_0_628	sense	584823	584858	35	6.34253	3.04441	32	5	3.17731
chrII	603738	603738	+	antisense_CDS	INT_0_644	INT_0_644	sense	603663	603785	122	48.7106	16.4906	72	19	4.21434
chrII	605728	605729	+	intergenic_region	INT_0_646	INT_0_646	sense	605710	605758	48	20.0424	6.08883	19	10	7.50999
chrII	605900	605900	+	intergenic_region	INT_0_646	INT_0_646	sense	605878	605930	52	32.2201	13.9536	15	13	31.9664
chrII	609075	609075	+	3UTR	RIM2	YBR192W	sense	609075	609113	38	3.55182	2.28331	23	4	3.29812
chrII	614877	614890	+	CUTs	XUT_2F-242	571637	sense	614835	614945	110	70.2752	14.461	49	29	10.0797
chrII	615324	615324	+	XUTs	XUT_2F-242	571637	sense	615306	615379	73	7.10363	2.79071	26	7	6.84993
chrII	617453	617459	+	antisense_CDS	INT_0_656	INT_0_656	sense	617449	617481	32	7.61104	2.28331	12	8	6.14279
chrII	620561	620555	+	intergenic_region	INT_0_659	INT_0_659	sense	620555	620639	84	58.605	18.5202	31	21	3.74759
chrII	624902	624902	+	intergenic_region	INT_0_662	INT_0_662	sense	624897	624912	15	6.84993	5.32773	3	2	6.59623
chrII	636739	636739	+	antisense_CDS	INT_0_670	INT_0_670	sense	636677	636766	89	10.9092	2.79071	61	13	6.05201
chrII	644491	644491	+	XUTs	XUT_2F-258	571639	sense	644490	644497	7	9.89435	3.80552	3	3	2.47124
chrII	644506	644506	+	XUTs	XUT_2F-258	571639	sense	644499	644515	16	7.61104	4.05922	6	7	3.29498
chrII	645097	645097	+	tRNA_100_nt_upstream	XUT_2F-258	571639	sense	645059	645163	104	18.2665	3.55182	12	11	18.0128
chrII	679561	679561	+	antisense_CDS	INT_0_700	INT_0_700	sense	679495	679573	78	19.2813	5.83513	26	14	19.0276
chrII	685581	685592	+	antisense_CDS	INT_0_709	INT_0_709	sense	685580	685652	72	16.7443	2.53701	30	14	4.91726
chrII	700152	700152	+	intergenic_region	INT_0_717	INT_0_717	sense	700091	700166	75	6.84993	3.29812	64	8	5.50733
chrII	706901	706901	+	intergenic_region	INT_0_724	INT_0_724	sense	706883	706927	44	18.0128	10.4018	5	5	7.41371
chrII	708202	708268	+	3UTR	GPX2	YBR244W	sense	708157	708326	169	26.1312	4.56662	137	28	2.86244
chrII	712896	712893	+	3UTR	RRT2	YBR246W	sense	712893	712927	34	26.3849	14.461	16	9	2.32101
chrII	716520	716520	+	intergenic_region	INT_0_731	INT_0_731	sense	716515	716544	29	10.6555	7.10363	20	5	10.4018
chrII	716892	716892	+	antisense_CDS	INT_0_731	INT_0_731	sense	716889	716916	27	11.924	10.148	-1	1	8.11978
chrII	720741	720734	+	3UTR	SPO23	YBR250W	sense	720732	720741	9	8.87954	4.05922	6	5	4.82032
chrII	727045	727044	+	antisense_CDS	INT_0_742	INT_0_742	sense	727036	727126	90	27.6534	10.148	34	11	4.72183
chrII	741154	741151	+	3UTR	REI1	YBR267W	sense	741147	741191	44	26.6386	12.9388	7	6	2.6865
chrII	751376	751376	+	3UTR	CHK1	YBR274W	sense	751376	751380	4	5.83513	2.53701	3	3	3.80552
chrII	764970	764970	+	antisense_CDS	INT_0_772	INT_0_772	sense	764952	765013	61	13.4462	4.82032	33	9	11.0147
chrII	773799	773794	+	5UTR	INT_0_778	INT_0_778	sense	773794	773820	26	14.9684	5.32773	25	7	4.97778
chrII	778082	778082	+	3UTR	YBR287W	YBR287W	sense	778079	778121	42	8.37214	4.82032	24	4	8.11844
chrII	778178	778177	+	antisense_CDS	INT_0_782	INT_0_782	sense	778162	778231	69	21.5646	8.11844	16	6	17.7929
chrII	783683	783666	+	3UTR	BSD2	YBR290W	sense	783658	783733	75	116.195	46.681	20	11	2.68894
chrII	786663	786663	+	5UTR	XUT_2R-342	571692	antisense	786662	786664	2	4.05922	3.80552	-1	1	4.05922
chrII	788714	788693	+	intergenic_region	INT_0_790	INT_0_790	sense	788667	788734	67	20.2961	7.61104	45	6	6.97242
chrII	796652	796653	+	intergenic_region	INT_0_793	INT_0_793	sense	796652	796664	12	19.2813	11.4166	5	3	4.67251
chrII	802170	802177	+	3UTR	MAL33	YBR297W	sense	802116	802178	62	79.1548	24.609	23	14	2.56155
chrXIII	14056	13892	+	SUTs	XUT_13F-3	572694	sense	13710	14279	569	125.075	3.80552	350	171	20.0415
chrXIII	14420	14420	+	intergenic_region	INT_0_6276	INT_0_6276	sense	14302	14564	262	26.6386	4.31292	174	41	26.3849
chrXIII	28160	28162	+	intergenic_region	INT_0_6290	INT_0_6290	sense	28160	28173	13	14.9684	7.61104	7	6	6.82532
chrXIII	30370	30370	+	SUTs	SUT286	ST2423	sense	30348	30381	33	10.9092	2.53701	9	9	10.6555
chrXIII	37925	37925	+	3UTR	INT_0_6297	INT_0_6297	sense	37923	37951	28	18.0128	12.9388	9	5	4.94247
chrXIII	39982	39982	+	3UTR	INT_0_6294	INT_0_6294	antisense	39982	39998	16	2.79071	2.28331	-1	1	2.53701
chrXIII	49827	49827	+	3UTR	BUL2	YML111W	sense	49821	49836	15	8.37214	4.31292	4	4	2.44408
chrXIII	57711	57814	+	CUTs	CUT282	ST2434	sense	57662	57898	236	68.2456	6.59623	190	78	7.88442
chrXIII	74338	74336	+	CDS	YML099W-A	YML099W-A	sense	74335	74362	27	10.148	3.29812	11	8	9.89435
chrXIII	78335	78332	+	CUTs	CUT284	ST2440	sense	78297	78341	44	13.1925	5.32773	11	7	4.91038
chrXIII	78603	78603	+	antisense_CDS	INT_0_6325	INT_0_6325	sense	78579	78608	29	3.80552	2.28331	15	3	3.55182
chrXIII	83084	83084	+	5UTR	INT_0_6330	INT_0_6330	sense	83029	83085	56	5.83513	2.02961	34	7	4.05989
chrXIII	85917	85917	+	3UTR	UTP14	YML093W	sense	85909	85919	10	4.56662	2.53701	4	3	4.05922
chrXIII	92019	92018	+	intergenic_region	INT_0_6334	INT_0_6334	sense	91995	92073	78	94.3769	10.6555	18	20	56.1324
chrXIII	111822	111822	+	5UTR	INT_0_6350	INT_0_6350	sense	111813	111889	76	11.4166	5.32773	47	13	9.3201
chrXIII	123235	123235	+	antisense_CDS	INT_0_6356	INT_0_6356	sense	123235	123252	17	2.53701	2.02961	16	2	2.02961
chrXIII	145109	145109	+	3UTR	INT_0_6372	INT_0_6372	sense	145109	145143	34	5.07402	2.28331	19	2	2.8747
chrXIII	147497	147496	+	CUTs	CUT287	ST2463	sense	147381	147533	152	20.8035	3.04441	101	22	2.85957
chrXIII	147749	147746	+	antisense_CDS	INT_0_6376	INT_0_6376	sense	147740	147755	15	8.37214	3.29812	5	4	8.11844
chrXIII	147875	147874	+	antisense_CDS	INT_0_6376	INT_0_6376	sense	147872	147920	48	9.13324	5.32773	2	2	8.62584
chrXIII	148777	148777	+	SUTs	INT_0_6376	INT_0_6376	sense	148610	148805	195	13.4462	5.07402	128	19	13.1925
chrXIII	149026	149018	+	SUTs	SUT293	ST2464	sense	148958	149102	144	82.9603	18.0128	62	27	6.05732
chrXIII	153219	153219	+	3UTR	OGG1	YML060W	sense	153216	153227	11	5.83513	4.82032	-1	1	5.58143
chrXIII	160013	160013	+	intergenic_region	INT_0_6383	INT_0_6383	sense	159986	160095	109	25.1164	6.08883	66	32	4.51269
chrXIII	162190	162185	+	intergenic_region	INT_0_6385	INT_0_6385	sense	162180	162291	111	36.0256	7.86474	34	13	5.14943
chrXIII	169001	169002	+	intergenic_region	INT_0_6392	INT_0_6392	sense	168957	169076	119	48.7106	6.08883	62	40	6.52543
chrXIII	190104	190104	+	intergenic_region	INT_0_6405	INT_0_6405	sense	190098	190150	52	13.4462	6.59623	25	10	7.71631
chrXIII	202277	202296	+	intergenic_region	INT_0_6410	INT_0_6410	sense	202212	202377	165	46.681	8.11844	107	35	2.80892
chrXIII	202575	202575	+	intergenic_region	INT_0_6410	INT_0_6410	sense	202570	202583	13	4.82032	2.02961	9	5	3.81277
chrXIII	202749	202749	+	intergenic_region	INT_0_6410	INT_0_6410	sense	202731	202761	30	22.3257	19.2813	-1	1	18.4284
chrXIII	206895	206894	+	antisense_CDS	INT_0_6414	INT_0_6414	sense	206882	206929	47	12.6851	5.32773	29	9	12.4314
chrXIII	208925	208925	+	intergenic_region	INT_0_6414	INT_0_6414	sense	208920	208944	24	3.29812	2.28331	8	3	3.04441
chrXIII	220846	220913	+	3UTR	INT_0_6423	INT_0_6423	sense	220842	220984	142	79.9159	25.1164	67	43	2.54999
chrXIII	226951	226947	+	intergenic_region	INT_0_6428	INT_0_6428	sense	226918	226961	43	123.045	37.2941	23	20	5.0753
chrXIII	239222	239222	+	3UTR	PSP2	YML017W	sense	239206	239284	78	39.07	25.1164	5	5	5.58767
chrXIII	247558	247561	+	CUTs	CUT291	ST2496	sense	247517	247637	120	22.5794	4.31292	29	12	11.6501
chrXIII	251210	251228	+	3UTR	YML009W-B	YML009W-B	sense	251206	251290	84	43.8903	10.6555	46	16	3.62213
chrXIII	268011	268000	+	intergenic_region	INT_0_6463	INT_0_6463	sense	267912	268017	105	66.9771	10.148	72	40	6.0553
chrXIII	286748	286777	+	3UTR	YMR010W	YMR010W	sense	286667	286853	186	82.7066	23.3405	96	33	6.91658
chrXIII	289949	289949	+	SUTs	SUT297	ST2511	sense	289862	290018	156	17.5054	3.80552	113	20	8.0021
chrXIII	290735	290733	+	tRNA_100_nt_upstream	INT_0_6483	INT_0_6483	sense	290690	290753	63	13.4462	3.55182	43	11	3.23961
chrXIII	297176	297176	+	snoRNA_300_nt_upstream	SUT298	ST2513	sense	297155	297208	53	80.9307	45.1588	13	10	80.677
chrXIII	297420	297421	+	snoRNA_1000_nt_downstream	INT_0_6488	INT_0_6488	sense	297384	297453	69	135.476	40.5922	16	18	135.223
chrXIII	297646	297641	+	snoRNA_1000_nt_downstream	YMR013W-A	YMR013W-A	sense	297585	297703	118	989.181	332.856	33	33	65.513
chrXIII	297880	297874	+	snoRNA_1000_nt_downstream	YMR013W-A	YMR013W-A	sense	297831	297912	81	433.829	138.521	32	32	433.575
chrXIII	297999	298018	+	snoRNA	YMR013W-A	YMR013W-A	sense	297999	298065	66	40.5922	5.32773	48	28	8.41986
chrXIII	298248	298247	+	snoRNA_1000_nt_downstream	YMR013W-A	YMR013W-A	sense	298218	298266	48	41.8607	27.3997	6	7	34.7385
chrXIII	298474	298470	+	snoRNA_1000_nt_downstream	YMR013W-A	YMR013W-A	sense	298409	298512	103	1024.45	225.794	33	35	142.52
chrXIII	298705	298698	+	snoRNA_1000_nt_downstream	INT_0_6494	INT_0_6494	sense	298649	298755	106	116.449	16.7443	37	30	7.93458
chrXIII	300704	300704	+	intergenic_region	INT_0_6495	INT_0_6495	sense	300702	300731	29	5.07402	2.53701	7	4	4.82032
chrXIII	302872	302872	+	XUTs	XUT_13F-137	572715	sense	302836	302881	45	5.83513	2.53701	7	5	5.58143
chrXIII	308751	308751	+	3UTR	INT_0_6499	INT_0_6499	sense	308751	308755	4	3.55182	2.79071	3	2	2.79071
chrXIII	315280	315280	+	5UTR	INT_0_6503	INT_0_6503	sense	315265	315304	39	5.58143	2.02961	29	6	4.31292
chrXIII	319411	319449	+	intergenic_region	INT_0_6507	INT_0_6507	sense	319381	319516	135	17.5054	3.29812	60	20	7.20189
chrXIII	327421	327421	+	3UTR	YMR027W	YMR027W	sense	327406	327432	26	8.87954	3.29812	8	5	3.60095
chrXIII	339428	339424	+	3UTR	ARP9	YMR033W	sense	339424	339430	6	14.2073	5.07402	4	5	2.7412
chrXIII	339500	339504	+	3UTR	INT_0_6521	INT_0_6521	sense	339481	339538	57	42.6218	15.2221	19	12	2.85274
chrXIII	347049	347049	+	intergenic_region	INT_0_6526	INT_0_6526	sense	347010	347057	47	5.83513	2.02961	33	9	5.58143
chrXIII	349128	349128	+	CUTs	CUT295	ST2536	sense	348783	349393	610	88.0343	2.02961	341	166	87.7806
chrXIII	349599	349601	+	intergenic_region	INT_0_6530	INT_0_6530	sense	349544	349710	166	52.2625	13.4462	41	23	27.1395
chrXIII	350938	350945	+	3UTR	YET2	YMR040W	sense	350910	350971	61	17.2517	3.80552	14	12	4.43499
chrXIII	357037	357037	+	intergenic_region	INT_0_6539	INT_0_6539	sense	357027	357050	23	4.31292	2.02961	10	3	4.05922
chrXIII	363001	363000	+	tRNA_100_nt_upstream	INT_0_6541	INT_0_6541	sense	362950	363018	68	27.146	5.83513	30	22	26.8923
chrXIII	363308	363309	+	intergenic_region	INT_0_6542	INT_0_6542	sense	363287	363336	49	23.3405	10.6555	13	8	4.713
chrXIII	368081	368081	+	intergenic_region	INT_0_6544	INT_0_6544	sense	368051	368150	99	15.9832	3.29812	39	12	3.45602
chrXIII	380906	380905	+	3UTR	STB2	YMR053C	antisense	380869	381042	173	30.1904	5.32773	103	32	2.84032
chrXIII	394938	394943	+	3UTR	RNA14	YMR061W	sense	394908	394976	68	22.8331	6.34253	22	14	5.89125
chrXIII	399416	399416	+	3UTR	RIM9	YMR063W	sense	399416	399424	8	2.79071	2.28331	-1	1	2.28331
chrXIII	399707	399718	+	3UTR	AEP1	YMR064W	sense	399707	399761	54	7.86474	3.04441	25	5	7.61104
chrXIII	412268	412338	+	3UTR	ABF2	YMR072W	sense	412264	412422	158	46.681	4.82032	112	41	2.33513
chrXIII	426390	426391	+	3UTR	SEC14	YMR079W	sense	426390	426394	4	6.34253	2.53701	1	3	2.58892
chrXIII	431521	431521	+	XUTs	XUT_13F-195	572728	sense	431490	431544	54	7.61104	2.02961	50	14	5.11899
chrXIII	436162	436162	+	intergenic_region	INT_0_6596	INT_0_6596	sense	436162	436187	25	7.35734	3.55182	8	6	5.93097
chrXIII	438902	438891	+	intergenic_region	INT_0_6598	INT_0_6598	sense	438811	438937	126	60.6346	13.4462	78	25	6.78398
chrXIII	443417	443417	+	3UTR	YMR087W	YMR087W	sense	443417	443435	18	5.58143	2.02961	17	7	3.00079
chrXIII	445487	445487	+	intergenic_region	INT_0_6605	INT_0_6605	sense	445487	445517	30	5.58143	2.79071	11	3	4.23641
chrXIII	450058	450058	+	3UTR	YMR090W	YMR090W	sense	450017	450081	64	13.9536	7.61104	22	6	3.74759
chrXIII	468367	468396	+	3UTR	MUB1	YMR100W	sense	468367	468405	38	21.8183	10.9092	28	9	2.44182
chrXIII	483530	483530	+	intergenic_region	INT_0_6633	INT_0_6633	sense	483530	483555	25	6.34253	2.28331	21	6	5.58143
chrXIII	486328	486356	+	3UTR	ILV2	YMR108W	sense	486326	486373	47	170.741	58.8587	8	10	2.37239
chrXIII	486420	486420	+	intergenic_region	INT_0_6634	INT_0_6634	sense	486410	486444	34	6.34253	2.79071	9	4	6.08883
chrXIII	496363	496363	+	3UTR	FOL3	YMR113W	sense	496363	496374	11	3.04441	2.02961	4	3	2.79071
chrXIII	509775	509759	+	antisense_CDS	INT_0_6653	INT_0_6653	sense	509740	509782	42	12.9388	2.79071	33	12	3.78251
chrXIII	510480	510480	+	intergenic_region	INT_0_6653	INT_0_6653	sense	510417	510499	82	13.9536	4.31292	41	15	13.6999
chrXIII	512198	512219	+	SUTs	SUT307	ST2583	sense	512063	512324	261	111.375	13.1925	126	53	8.41504
chrXIII	512561	512562	+	intergenic_region	INT_0_6657	INT_0_6657	sense	512561	512582	21	12.6851	6.08883	3	3	12.4314
chrXIII	513998	514000	+	3UTR	PKR1	YMR123W	sense	513988	514001	13	8.37214	2.53701	2	3	5.08369
chrXIII	527690	527691	+	intergenic_region	INT_0_6665	INT_0_6665	sense	527668	527719	51	12.9388	3.55182	10	8	7.41371
chrXIII	535678	535678	+	CUTs	CUT301	ST2591	sense	535415	535763	348	31.9664	4.31292	220	50	31.2053
chrXIII	535910	535910	+	CUTs	CUT302	ST2592	sense	535829	535992	163	20.2961	2.02961	120	29	20.0424
chrXIII	536089	536089	+	intergenic_region	INT_0_6670	INT_0_6670	sense	536085	536094	9	4.56662	3.29812	2	2	4.31292
chrXIII	538857	538863	+	3UTR	YMR134W	YMR134W	sense	538829	538911	82	40.8459	11.6703	21	16	2.60702
chrXIII	578819	578819	+	intergenic_region	INT_0_6715	INT_0_6715	sense	578797	578890	93	10.4018	2.53701	73	15	3.755
chrXIII	578947	578937	+	intergenic_region	INT_0_6715	INT_0_6715	sense	578923	578962	39	9.38695	3.29812	18	7	9.13324
chrXIII	599393	599387	+	XUTs	XUT_13F-259	572744	sense	599386	599404	18	7.35734	3.55182	5	4	5.93097
chrXIII	610050	610049	+	3UTR	YMR173W-A	YMR173W-A	sense	610047	610050	3	9.89435	5.83513	0	2	4.05922
chrXIII	610169	610160	+	antisense_CDS	INT_0_6734	INT_0_6734	sense	610108	610178	70	32.9812	11.6703	35	21	5.06015
chrXIII	616529	616525	+	5UTR	MMT1	YMR177W	sense	616516	616561	45	14.461	3.04441	32	11	9.88495
chrXIII	625249	625249	+	5UTR	XUT_13F-274	572747	sense	625248	625250	2	2.79071	2.53701	-1	1	2.79071
chrXIII	626024	626068	+	3UTR	YMR182W-A	YMR182W-A	sense	626003	626130	127	26.6386	3.80552	73	28	4.40586
chrXIII	626285	626286	+	snoRNA_300_nt_upstream	YMR182W-A	YMR182W-A	sense	626232	626339	107	152.982	39.07	48	38	152.728
chrXIII	626881	626835	+	snoRNA_1000_nt_downstream	INT_0_6752	INT_0_6752	sense	626653	627150	497	448.29	16.7443	162	135	30.6619
chrXIII	632028	631987	+	3UTR	YMR185W	YMR185W	sense	631987	632028	41	55.5606	32.7275	16	8	2.2695
chrXIII	634588	634603	+	3UTR	INT_0_6757	INT_0_6757	sense	634583	634656	73	26.6386	3.29812	36	23	3.93381
chrXIII	634732	634732	+	antisense_CDS	INT_0_6757	INT_0_6757	sense	634689	634752	63	9.64065	3.80552	40	9	9.38695
chrXIII	640949	640949	+	antisense_CDS	INT_0_6760	INT_0_6760	sense	640948	640991	43	4.31292	2.53701	31	5	4.05922
chrXIII	652251	652251	+	snoRNA_300_nt_upstream	INT_0_6768	INT_0_6768	sense	652232	652256	24	7.86474	2.53701	3	5	7.61104
chrXIII	653015	652918	+	snoRNA_1000_nt_downstream	CUT307	ST2635	sense	652427	653487	1060	1026.98	28.9219	349	290	87.4732
chrXIII	653887	653895	+	XUTs	XUT_13F-286	572748	sense	653845	653983	138	80.4233	27.6534	28	22	18.5931
chrXIII	654021	654021	+	5UTR	ICY1	YMR195W	sense	654009	654089	80	10.9092	4.31292	48	10	10.4018
chrXIII	669922	669922	+	3UTR	TOM40	YMR203W	sense	669922	669924	2	3.55182	2.02961	1	2	2.02961
chrXIII	669934	669933	+	3UTR	TOM40	YMR203W	sense	669932	669940	8	11.1629	6.84993	0	2	2.27707
chrXIII	669941	669988	+	3UTR	INT_0_6785	INT_0_6785	sense	669941	670000	59	29.4293	15.7295	18	12	2.1182
chrXIII	675678	675677	+	intergenic_region	INT_0_6788	INT_0_6788	sense	675677	675866	189	21.8183	5.07402	151	33	6.43026
chrXIII	696702	696706	+	3UTR	SCJ1	YMR214W	sense	696680	696736	56	12.6851	4.56662	41	11	2.31077
chrXIII	703598	703598	+	antisense_CDS	INT_0_6802	INT_0_6802	sense	703517	703616	99	26.1312	7.86474	76	18	6.00158
chrXIII	713912	713935	+	3UTR	ERG8	YMR220W	sense	713765	713974	209	229.6	90.5713	72	38	2.24748
chrXIII	718588	718571	+	antisense_CDS	INT_0_6809	INT_0_6809	sense	718556	718598	42	28.9219	10.9092	16	13	2.91899
chrXIII	733449	733451	+	CDS	YMR230W-A	YMR230W-A	sense	733430	733580	150	133.701	43.3829	72	34	7.42783
chrXIII	746291	746293	+	5UTR	DFG5	YMR238W	sense	746263	746312	49	31.2053	10.4018	16	12	8.61403
chrXIII	747845	747855	+	intergenic_region	INT_0_6829	INT_0_6829	sense	747828	747881	53	40.3385	7.86474	23	17	3.56038
chrXIII	753203	753203	+	intergenic_region	INT_0_6833	INT_0_6833	sense	753172	753233	61	15.9832	7.35734	44	14	6.56643
chrXIII	758952	758952	+	CDS	YMR245W	YMR245W	sense	758920	759024	104	16.998	9.13324	20	10	11.2971
chrXIII	762101	762096	+	intergenic_region	INT_0_6843	INT_0_6843	sense	762094	762195	101	15.7295	3.80552	40	13	3.17731
chrXIII	764186	764186	+	XUTs	XUT_13F-333	572752	sense	764181	764211	30	5.83513	2.53701	23	7	5.32773
chrXIII	772868	772866	+	3UTR	GAD1	YMR250W	sense	772826	772892	66	39.07	23.5942	9	7	25.948
chrXIII	775406	775406	+	antisense_CDS	INT_0_6853	INT_0_6853	sense	775277	775439	162	16.998	2.28331	139	37	16.7443
chrXIII	790122	790123	+	intergenic_region	INT_0_6864	INT_0_6864	sense	790122	790171	49	12.1777	5.58143	7	4	9.95556
chrXIII	794951	794944	+	CDS	SAP30	YMR263W	sense	794887	794987	100	38.0552	7.61104	40	19	3.5865
chrXIII	795745	795745	+	5UTR	INT_0_6869	INT_0_6869	sense	795691	795781	90	14.9684	2.79071	52	14	2.67078
chrXIII	798412	798412	+	intergenic_region	INT_0_6871	INT_0_6871	sense	798388	798426	38	4.82032	2.28331	15	6	4.56662
chrXIII	803115	803113	+	3UTR	PPA2	YMR267W	sense	803057	803117	60	9.89435	3.04441	54	8	9.64065
chrXIII	805244	805241	+	intergenic_region	INT_0_6878	INT_0_6878	sense	805203	805263	60	23.3405	6.59623	52	13	6.42522
chrXIII	809556	809556	+	intergenic_region	XUT_13F-350	572757	sense	809528	809564	36	8.37214	2.79071	27	7	5.93097
chrXIII	814454	814454	+	CUTs	CUT310	ST2684	sense	814451	814459	8	3.04441	2.02961	1	3	2.79071
chrXIII	831043	831043	+	antisense_CDS	INT_0_6896	INT_0_6896	sense	831020	831069	49	10.9092	6.34253	7	6	10.6555
chrXIII	840144	840144	+	3UTR	YKU70	YMR284W	sense	840143	840185	42	8.87954	3.55182	13	4	4.00105
chrXIII	842405	842402	+	3UTR	INT_0_6905	INT_0_6905	sense	842393	842415	22	21.5646	9.64065	3	4	4.68234
chrXIII	851699	851699	+	CDS	YMR290W-A	YMR290W-A	sense	851680	851703	23	5.58143	4.56662	-1	1	5.32773
chrXIII	854574	854574	+	3UTR	YMR291W	YMR291W	sense	854563	854599	36	22.8331	6.34253	23	13	3.62539
chrXIII	854825	854825	+	intron	YMR292W_intron	intergenic	sense	854817	854849	32	4.56662	2.02961	23	5	3.80552
chrXIII	864918	864918	+	antisense_CDS	CUT312	ST2699	sense	864918	864958	40	5.83513	3.29812	32	6	5.58143
chrXIII	865500	865500	+	intergenic_region	INT_0_6923	INT_0_6923	sense	865500	865507	7	2.53701	2.02961	5	2	2.28331
chrXIII	874551	874550	+	intergenic_region	INT_0_6932	INT_0_6932	sense	874529	874561	32	9.13324	5.32773	4	5	8.87954
chrXIII	878452	878454	+	CDS	UBP15	YMR304W	sense	878417	878468	51	21.5646	7.35734	9	8	21.3109
chrXIII	878957	878957	+	3UTR	UBP15	YMR304W	sense	878946	878968	22	12.1777	4.56662	10	6	2.9329
chrXIII	902705	902723	+	5UTR	INT_0_6949	INT_0_6949	sense	902696	902750	54	20.8035	10.4018	17	8	3.57447
chrXIII	905903	905901	+	3UTR	DIA1	YMR316W	sense	905843	905928	85	677.382	170.234	11	13	4.50667
chrXIII	905970	905972	+	antisense_CDS	INT_0_6953	INT_0_6953	sense	905952	906079	127	54.0384	13.6999	21	15	9.71611
chrXIII	906708	906708	+	XUTs	XUT_13F-390	572765	sense	906708	906730	22	4.31292	3.29812	12	2	4.05922
chrXIII	906866	906864	+	XUTs	XUT_13F-390	572765	sense	906842	906892	50	25.6238	13.1925	4	5	11.6501
chrXIII	906952	906952	+	XUTs	XUT_13F-390	572765	sense	906916	906983	67	12.9388	2.28331	47	15	12.6851
chrXIII	907006	907006	+	intergenic_region	XUT_13F-390	572765	sense	907006	907007	1	3.04441	3.04441	-1	1	3.04441
chrI	9913	9912	+	5UTR	INT_0_52	INT_0_52	sense	9912	9922	10	19.2813	9.64065	1	3	3.45359
chrI	28119	28138	+	XUTs	XUT_1F-14	571567	sense	28106	28143	37	21.5646	5.83513	20	8	2.78014
chrI	30905	30905	+	CUTs	XUT_1F-15	571568	sense	30804	30911	107	14.461	3.55182	88	14	11.8619
chrI	48321	48357	+	3UTR	FLC2	YAL053W	sense	48315	48365	50	162.876	88.7954	5	6	2.09532
chrI	62686	62685	+	3UTR	INT_0_97	INT_0_97	sense	62676	62723	47	8.62584	2.53701	30	12	8.37214
chrI	65594	65594	+	intergenic_region	INT_0_98	INT_0_98	sense	65589	65611	22	8.11844	3.80552	14	6	7.61104
chrI	73634	73634	+	5UTR	YAL037W	YAL037W	sense	73617	73678	61	8.87954	5.07402	16	5	8.62584
chrI	101302	101302	+	intergenic_region	INT_0_124	INT_0_124	sense	101302	101304	2	2.79071	2.53701	-1	1	2.53701
chrI	135083	135083	+	antisense_CDS	INT_0_142	INT_0_142	sense	135083	135084	1	3.04441	3.04441	-1	1	3.04441
chrI	138798	138798	+	5UTR	YAL004W	YAL004W	sense	138792	138947	155	26.1312	9.13324	98	35	8.30988
chrI	139236	139236	+	tRNA	YAL004W	YAL004W	sense	139191	139274	83	23.3405	2.28331	42	25	23.0868
chrI	142589	142576	+	snoRNA_1000_nt_downstream	YAL003W_intron	intergenic	sense	142451	142640	189	1413.37	165.413	130	94	76.6129
chrI	143462	143509	+	snoRNA_1000_nt_downstream	CUT003	ST0035	sense	143454	143796	342	118.986	22.5794	203	65	4.4654
chrI	154041	154041	+	3UTR	NUP60	YAR002W	sense	154039	154081	42	8.62584	2.53701	39	6	4.08511
chrI	156842	156842	+	3UTR	SWD1	YAR003W	sense	156827	156853	26	4.05922	2.53701	16	4	3.55182
chrI	156903	156897	+	antisense_CDS	INT_0_158	INT_0_158	sense	156866	156920	54	23.3405	9.38695	38	12	6.35461
chrI	159915	159909	+	3UTR	SEN34	YAR008W	sense	159906	160011	105	25.6238	15.7295	30	12	2.94195
chrI	166195	166197	+	tRNA_100_nt_upstream	INT_0_160	INT_0_160	sense	166165	166220	55	61.9031	14.2073	22	20	61.6494
chrI	176271	176271	+	intergenic_region	INT_0_169	INT_0_169	sense	176271	176294	23	6.34253	3.55182	16	5	6.08883
chrI	181221	181225	+	tRNA	SUP56	tL(CAA)A	sense	181200	181262	62	30.6979	4.31292	33	21	30.4441
chrI	186771	186798	+	3UTR	YAR029W	YAR029W	sense	186748	186844	96	48.7106	12.1777	59	18	2.93172
chrI	189260	189260	+	intergenic_region	INT_0_185	INT_0_185	sense	189260	189304	44	6.84993	3.80552	33	5	6.08883
chrI	198437	198444	+	XUTs	XUT_1F-90	571576	sense	198437	198445	8	6.34253	3.55182	6	3	4.41292
chrVIII	7935	7935	+	3UTR	COS8	YHL048W	sense	7935	7936	1	2.02961	2.02961	-1	1	2.02961
chrVIII	8117	8109	+	intergenic_region	INT_0_4025	INT_0_4025	sense	8044	8147	103	27.3997	4.31292	37	18	27.146
chrVIII	27983	27983	+	3UTR	MUP3	YHL036W	sense	27983	27991	8	4.56662	3.80552	-1	1	4.05922
chrVIII	53174	53174	+	3UTR	RIM101	YHL027W	sense	53156	53190	34	9.89435	3.55182	22	11	3.60095
chrVIII	54709	54709	+	intergenic_region	INT_0_4054	INT_0_4054	sense	54705	54710	5	5.83513	5.58143	-1	1	5.83513
chrVIII	76777	76777	+	SUTs	SUT149	ST1403	sense	76752	76797	45	11.6703	5.58143	26	11	11.4166
chrVIII	77407	77407	+	CUTs	CUT172	ST1404	sense	77392	77414	22	7.86474	2.53701	9	7	7.61104
chrVIII	92566	92570	+	intergenic_region	INT_0_4084	INT_0_4084	sense	92564	92583	19	7.61104	2.53701	5	3	3.0714
chrVIII	102628	102572	+	CDS	HSE1	YHL002W	sense	102569	102704	135	33.996	4.82032	81	35	3.20138
chrVIII	107596	107595	+	3UTR	OSH7	YHR001W	sense	107570	107687	117	34.7571	15.2221	51	18	2.36128
chrVIII	124011	124010	+	SUTs	SUT153	ST1417	sense	123992	124022	30	6.84993	4.56662	10	3	5.58143
chrVIII	158752	158752	+	antisense_CDS	INT_0_4141	INT_0_4141	sense	158730	158753	23	2.79071	2.02961	3	2	2.79071
chrVIII	160627	160675	+	intergenic_region	INT_0_4143	INT_0_4143	sense	160612	160696	84	28.9219	10.4018	55	14	3.73995
chrVIII	171746	171746	+	CUTs	CUT176	ST1434	sense	170992	171892	900	63.679	2.02961	667	144	63.4253
chrVIII	176953	176984	+	3UTR	YHR033W	YHR033W	sense	176945	177033	88	55.8143	21.3109	12	9	4.06918
chrVIII	183797	183797	+	3UTR	PUT2	YHR037W	sense	183797	183800	3	2.79071	2.28331	-1	1	2.53701
chrVIII	192805	192801	+	3UTR	NCP1	YHR042W	sense	192801	192825	24	13.6999	6.34253	6	3	2.45519
chrVIII	207502	207502	+	5UTR	INT_0_4180	INT_0_4180	sense	207483	207512	29	7.10363	2.02961	18	4	6.84993
chrVIII	212253	212255	+	intergenic_region	INT_0_4186	INT_0_4186	sense	212138	212293	155	23.5942	4.31292	61	19	7.855
chrVIII	233576	233633	+	intergenic_region	INT_0_4209	INT_0_4209	sense	233546	233727	181	66.7234	11.924	63	25	2.29326
chrVIII	238165	238165	+	intergenic_region	INT_0_4214	INT_0_4214	sense	238155	238204	49	7.10363	2.02961	23	6	6.84993
chrVIII	261830	261816	+	intergenic_region	INT_0_4231	INT_0_4231	sense	261804	261846	42	16.7443	3.29812	35	13	15.9832
chrVIII	268314	268330	+	3UTR	LRP1	YHR081W	sense	268303	268336	33	97.675	72.0512	8	10	2.90496
chrVIII	272504	272504	+	SUTs	SUT161	ST1471	sense	272471	272604	133	14.7147	2.79071	72	21	7.5461
chrVIII	281338	281344	+	3UTR	RTC3	YHR087W	sense	281321	281357	36	112.136	77.8863	4	6	4.70712
chrVIII	296505	296505	+	intergenic_region	XUT_8F-131	572242	sense	296490	296541	51	14.7147	10.148	15	5	6.03688
chrVIII	296674	296686	+	intergenic_region	INT_0_4260	INT_0_4260	sense	296674	296737	63	8.37214	3.80552	35	7	8.11844
chrVIII	297318	297318	+	intergenic_region	INT_0_4260	INT_0_4260	sense	297308	297353	45	6.59623	3.29812	34	4	4.56662
chrVIII	314323	314323	+	3UTR	XUT_8F-134	572243	sense	314315	314326	11	4.56662	2.53701	2	3	4.31292
chrVIII	323386	323386	+	5UTR	GRE3	YHR104W	sense	323386	323426	40	7.86474	4.56662	22	6	7.61104
chrVIII	324530	324524	+	3UTR	GRE3	YHR104W	sense	324508	324530	22	55.8143	27.146	7	8	2.71997
chrVIII	324531	324531	+	3UTR	GRE3	YHR104W	sense	324531	324543	12	8.11844	2.02961	4	6	2.34515
chrVIII	326780	326782	+	3UTR	TRR2	YHR106W	sense	326775	326783	8	11.1629	3.80552	2	4	3.38913
chrVIII	330266	330263	+	5UTR	INT_0_4274	INT_0_4274	sense	330250	330284	34	25.8775	7.10363	15	9	4.99291
chrVIII	333092	333083	+	3UTR	ERP5	YHR110W	sense	333082	333092	10	10.9092	3.04441	8	8	2.98474
chrVIII	336118	336097	+	3UTR	UBA4	YHR111W	sense	336033	336149	116	32.7275	11.1629	44	14	4.52857
chrVIII	337965	338021	+	3UTR	YHR113W	YHR113W	sense	337959	338070	111	33.996	6.59623	55	19	2.8747
chrVIII	340486	340486	+	antisense_CDS	INT_0_4282	INT_0_4282	sense	340486	340508	22	5.58143	2.02961	15	5	5.32773
chrVIII	362092	362092	+	3UTR	YHR127W	YHR127W	sense	362092	362105	13	7.61104	5.83513	0	2	4.94247
chrVIII	370722	370742	+	3UTR	NSG1	YHR133C	antisense	370700	370751	51	13.4462	2.79071	28	12	5.53086
chrVIII	374650	374655	+	intergenic_region	INT_0_4311	INT_0_4311	sense	374650	374675	25	9.89435	3.04441	13	6	9.64065
chrVIII	377434	377431	+	antisense_CDS	INT_0_4315	INT_0_4315	sense	377424	377465	41	9.89435	5.32773	11	4	8.04917
chrVIII	380546	380508	+	5UTR	XUT_8F-168	572250	sense	380490	380606	116	12.1777	2.79071	61	10	4.14815
chrVIII	381917	381873	+	snoRNA_1000_nt_downstream	INT_0_4322	INT_0_4322	sense	381733	381948	215	729.898	28.6682	150	140	98.3906
chrVIII	381973	381988	+	snoRNA_1000_nt_downstream	INT_0_4322	INT_0_4322	sense	381970	382167	197	214.124	29.9367	87	73	213.87
chrVIII	382394	382412	+	snoRNA_1000_nt_downstream	INT_0_4322	INT_0_4322	sense	382201	382531	330	81.6918	6.08883	230	104	81.4381
chrVIII	394496	394496	+	antisense_CDS	INT_0_4335	INT_0_4335	sense	394450	394523	73	10.4018	3.80552	27	12	5.29551
chrVIII	411136	411140	+	snoRNA_300_nt_upstream	LIN1	YHR156C	antisense	411081	411201	120	156.534	62.9179	34	30	93.201
chrVIII	411593	411601	+	snoRNA_1000_nt_downstream	CUT180	ST1522	sense	411316	412570	1254	612.435	18.2665	747	402	53.1537
chrVIII	412794	412794	+	intergenic_region	INT_0_4347	INT_0_4347	sense	412758	412840	82	11.1629	5.58143	13	9	9.10827
chrVIII	413598	413611	+	3UTR	intergenic	intergenic	sense	413549	413679	130	45.4125	11.4166	37	20	11.7825
chrVIII	420349	420341	+	intergenic_region	INT_0_4351	INT_0_4351	sense	420302	420358	56	16.4906	7.35734	42	13	4.84161
chrVIII	424657	424658	+	3UTR	SOL3	YHR163W	sense	424657	424660	3	8.11844	3.04441	2	3	2.91253
chrVIII	424825	424828	+	antisense_CDS	INT_0_4356	INT_0_4356	sense	424784	424912	128	27.3997	3.80552	67	29	22.6648
chrVIII	445576	445567	+	intergenic_region	INT_0_4366	INT_0_4366	sense	445567	445596	29	24.8627	15.9832	15	11	3.59338
chrVIII	452821	452951	+	5UTR	CTR2	YHR175W	sense	452804	453013	209	74.3345	12.1777	160	63	2.81143
chrVIII	453130	453130	+	CDS	CTR2	YHR175W	sense	453074	453168	94	11.4166	2.02961	43	15	11.1629
chrVIII	453677	453685	+	3UTR	CTR2	YHR175W	sense	453577	453778	201	360.002	60.3809	41	35	5.52135
chrVIII	453902	453908	+	3UTR	YHR175W-A	YHR175W-A	sense	453808	454020	212	91.0787	34.2497	69	30	47.2624
chrVIII	455638	455637	+	3UTR	FMO1	YHR176W	sense	455637	455638	1	9.64065	6.59623	0	2	3.04441
chrVIII	467073	467075	+	tRNA_100_nt_downstream	YHR180W-A	YHR180W-A	sense	467069	467125	56	35.2645	5.07402	12	14	35.0108
chrVIII	487851	487851	+	antisense_CDS	INT_0_4404	INT_0_4404	sense	487851	487863	12	6.84993	4.05922	2	4	5.50733
chrVIII	493715	493710	+	3UTR	UTP9	YHR196W	sense	493710	493715	5	21.3109	12.4314	2	4	2.1805
chrVIII	493798	493817	+	intergenic_region	INT_0_4410	INT_0_4410	sense	493782	493868	86	19.2813	6.08883	45	11	5.29551
chrVIII	497516	497516	+	XUTs	XUT_8F-226	572255	sense	497514	497524	10	5.83513	3.80552	4	2	5.58143
chrVIII	500148	500147	+	antisense_CDS	INT_0_4417	INT_0_4417	sense	500040	500154	114	16.7443	4.31292	97	16	6.88416
chrVIII	500397	500395	+	antisense_CDS	INT_0_4417	INT_0_4417	sense	500322	500410	88	38.8163	11.4166	11	11	26.8306
chrVIII	517197	517196	+	SUTs	SUT173	ST1563	sense	517187	517227	40	3.29812	2.28331	9	3	3.04441
chrVIII	520725	520725	+	3UTR	CRG1	YHR209W	sense	520691	520747	56	4.82032	3.04441	22	5	4.56662
chrVIII	530688	530688	+	intergenic_region	INT_0_4439	INT_0_4439	sense	530688	530712	24	7.61104	5.58143	15	3	7.35734
chrVIII	554316	554412	+	5UTR	IMD2	YHR216W	sense	554199	554723	524	339.199	17.7591	250	188	14.0095
chrVIII	556151	556150	+	3UTR	IMD2	YHR216W	sense	556145	556199	54	476.705	204.737	9	11	7.29647
chrXV	4137	4137	+	CDS	YOL164W-A	YOL164W-A	sense	4126	4193	67	6.08883	2.28331	50	9	5.83513
chrXV	10468	10468	+	3UTR	YOL163W	YOL163W	sense	10456	10501	45	7.86474	4.56662	7	3	4.53901
chrXV	10831	10832	+	intergenic_region	INT_0_7568	INT_0_7568	sense	10789	10844	55	20.2961	10.6555	3	5	9.17888
chrXV	16830	16830	+	XUTs	XUT_15F-6	572944	sense	16830	16837	7	2.79071	2.53701	-1	1	2.53701
chrXV	18743	18743	+	intergenic_region	INT_0_7576	INT_0_7576	sense	18723	18781	58	5.07402	2.53701	24	6	4.02459
chrXV	22514	22440	+	XUTs	XUT_15F-10	572946	sense	22129	22678	549	109.853	10.6555	255	120	19.0638
chrXV	31448	31444	+	antisense_CDS	INT_0_7583	INT_0_7583	sense	31384	31459	75	28.6682	5.07402	25	17	28.1608
chrXV	35498	35508	+	3UTR	ZPS1	YOL154W	sense	35471	35567	96	45.4125	13.9536	31	19	4.98064
chrXV	40760	40760	+	CDS	FRE7	YOL152W	sense	40760	40772	12	4.56662	2.28331	11	4	3.29812
chrXV	43292	43292	+	intergenic_region	INT_0_7591	INT_0_7591	sense	43245	43303	58	9.13324	2.28331	52	11	8.62584
chrXV	50237	50237	+	antisense_CDS	INT_0_7600	INT_0_7600	sense	50226	50345	119	7.10363	2.28331	75	14	6.84993
chrXV	71119	71123	+	intergenic_region	INT_0_7614	INT_0_7614	sense	71048	71160	112	21.8183	4.31292	81	22	2.90399
chrXV	77357	77352	+	3UTR	ALR1	YOL130W	sense	77352	77366	14	26.8923	13.9536	5	7	2.05936
chrXV	78259	78259	+	3UTR	VPS68	YOL129W	sense	78259	78263	4	3.80552	2.53701	3	2	2.53701
chrXV	81403	81404	+	intergenic_region	INT_0_7623	INT_0_7623	sense	81380	81479	99	145.878	31.459	26	24	3.77593
chrXV	81759	81759	+	XUTs	XUT_15F-42	572954	sense	81688	81833	145	13.4462	2.53701	83	20	7.86761
chrXV	82221	82221	+	antisense_CDS	INT_0_7624	INT_0_7624	sense	82221	82232	11	4.05922	2.53701	5	3	2.64775
chrXV	89589	89590	+	3UTR	HRP1	YOL123W	sense	89587	89593	6	30.6979	13.6999	2	4	2.47124
chrXV	89594	89649	+	3UTR	HRP1	YOL123W	sense	89594	89673	79	24.1016	6.59623	60	24	5.23977
chrXV	101193	101193	+	3UTR	MSN1	YOL116W	sense	101193	101198	5	3.80552	2.02961	4	2	2.02961
chrXV	101262	101254	+	3UTR	XUT_15R-66	573021	antisense	101223	101265	42	27.146	5.83513	18	12	6.75177
chrXV	101761	101761	+	CDS	PAP2	YOL115W	sense	101756	101777	21	8.87954	2.79071	9	8	3.00079
chrXV	126079	126079	+	antisense_CDS	INT_0_7660	INT_0_7660	sense	126074	126099	25	8.87954	5.83513	3	5	8.62584
chrXV	144069	144103	+	CUTs	CUT359	ST3015	sense	144021	144141	120	49.9791	15.4758	36	12	3.27817
chrXV	162283	162282	+	3UTR	YOL085W-A	YOL085W-A	sense	162278	162319	41	17.2517	4.56662	32	14	11.8266
chrXV	185852	185869	+	3UTR	ATP19	YOL077W-A	sense	185844	186066	222	49.9791	8.11844	108	52	6.91946
chrXV	202712	202712	+	antisense_CDS	INT_0_7713	INT_0_7713	sense	202697	202767	70	16.2369	8.37214	3	3	3.92491
chrXV	218736	218718	+	3UTR	GPD2	YOL059W	sense	218717	218769	52	36.533	10.9092	20	12	3.60599
chrXV	223058	223097	+	3UTR	YOL057W	YOL057W	sense	223053	223141	88	35.5182	4.31292	44	23	2.41336
chrXV	234294	234293	+	snoRNA_300_nt_upstream	INT_0_7738	INT_0_7738	sense	234268	234328	60	14.2073	2.53701	25	16	13.9536
chrXV	234555	234577	+	snoRNA_1000_nt_downstream	INT_0_7741	INT_0_7741	sense	234533	235021	488	516.536	151.713	119	111	93.7075
chrXV	240358	240345	+	antisense_CDS	INT_0_7745	INT_0_7745	sense	240345	240390	45	11.6703	7.10363	12	3	4.76596
chrXV	240533	240533	+	antisense_CDS	INT_0_7745	INT_0_7745	sense	240520	240541	21	5.07402	4.05922	2	2	4.82032
chrXV	251258	251258	+	intergenic_region	INT_0_7753	INT_0_7753	sense	251258	251283	25	4.56662	2.79071	3	2	4.31292
chrXV	254994	254994	+	antisense_CDS	INT_0_7757	INT_0_7757	sense	254973	254995	22	4.82032	3.29812	9	4	4.56662
chrXV	255047	255069	+	intergenic_region	INT_0_7757	INT_0_7757	sense	255018	255132	114	17.2517	2.53701	49	15	16.998
chrXV	256221	256201	+	3UTR	PRE6	YOL038W	sense	256196	256221	25	24.1016	12.6851	19	12	3.17731
chrXV	256660	256648	+	5UTR	YOL036W	YOL036W	sense	256627	256688	61	36.2793	6.34253	34	15	4.42331
chrXV	259412	259420	+	snoRNA_300_nt_upstream	INT_0_7762	INT_0_7762	sense	259394	259459	65	95.138	25.3701	32	24	94.8843
chrXV	259579	259807	+	snoRNA_1000_nt_downstream	SNR50	snR50	sense	259577	260136	559	386.641	21.5646	323	195	50.4066
chrXV	266783	266783	+	antisense_CDS	INT_0_7767	INT_0_7767	sense	266760	266849	89	12.4314	2.02961	64	19	12.1777
chrXV	274741	274740	+	tRNA	tS(GCU)O	tS(GCU)O	sense	274664	274761	97	19.7887	4.05922	47	23	19.535
chrXV	274853	274867	+	tRNA_100_nt_downstream	INT_0_7773	INT_0_7773	sense	274811	275025	214	167.443	15.4758	91	72	116.325
chrXV	282098	282098	+	tRNA_100_nt_upstream	XUT_15F-129	572963	sense	282098	282106	8	10.9092	9.64065	-1	1	10.6555
chrXV	298920	298920	+	3UTR	IRC10	YOL015W	sense	298897	299016	119	15.9832	2.53701	110	20	4.48082
chrXV	299481	299479	+	5UTR	INT_0_7788	INT_0_7788	sense	299473	299488	15	10.6555	5.83513	2	2	8.68463
chrXV	300850	300844	+	CDS	YOL013W-B	YOL013W-B	sense	300814	300924	110	16.4906	2.79071	41	13	5.21404
chrXV	301180	301186	+	tRNA	YOL013W-A	YOL013W-A	sense	301128	301217	89	67.2308	6.84993	32	32	66.9771
chrXV	301337	301336	+	intergenic_region	INT_0_7792	INT_0_7792	sense	301328	301338	10	14.461	3.55182	5	7	2.54184
chrXV	301384	301387	+	antisense_CDS	INT_0_7792	INT_0_7792	sense	301384	301424	40	12.4314	3.80552	26	12	2.54184
chrXV	316309	316305	+	CUTs	CUT368	ST3076	sense	316241	316348	107	60.8883	7.61104	32	24	60.6346
chrXV	321868	321868	+	antisense_CDS	INT_0_7806	INT_0_7806	sense	321806	321903	97	40.8459	21.3109	29	17	9.41424
chrXV	329103	329094	+	3UTR	RRP6	YOR001W	sense	329057	329240	183	586.557	237.464	63	58	3.57834
chrXV	331477	331477	+	3UTR	YSP3	YOR003W	sense	331477	331488	11	7.35734	4.05922	2	4	7.10363
chrXV	334637	334637	+	antisense_CDS	INT_0_7817	INT_0_7817	sense	334600	334645	45	6.59623	4.31292	5	4	6.34253
chrXV	338739	338739	+	intergenic_region	INT_0_7820	INT_0_7820	sense	338736	338781	45	3.29812	2.02961	27	4	3.04441
chrXV	345929	345940	+	3UTR	TIR4	YOR009W	sense	345923	345952	29	66.216	20.5498	11	12	4.44139
chrXV	360456	360461	+	3UTR	YOR015W	YOR015W	sense	360398	360531	133	43.3829	15.4758	48	12	3.46245
chrXV	382982	382982	+	3UTR	STI1	YOR027W	sense	382982	383026	44	4.05922	2.02961	38	6	3.80552
chrXV	383109	383105	+	intergenic_region	INT_0_7860	INT_0_7860	sense	383079	383154	75	20.2961	3.55182	42	15	7.60628
chrXV	383272	383255	+	intergenic_region	INT_0_7860	INT_0_7860	sense	383188	383290	102	56.8291	22.3257	65	25	15.7453
chrXV	383339	383339	+	intergenic_region	INT_0_7860	INT_0_7860	sense	383333	383418	85	23.0868	10.6555	39	14	22.8331
chrXV	383574	383560	+	antisense_CDS	INT_0_7860	INT_0_7860	sense	383513	383576	63	9.64065	2.79071	49	10	9.38695
chrXV	389551	389551	+	intergenic_region	INT_0_7868	INT_0_7868	sense	389538	389562	24	6.08883	2.53701	10	5	2.70659
chrXV	392523	392533	+	3UTR	YOR032W-A	YOR032W-A	sense	392393	392735	342	69.5141	5.83513	188	85	13.1425
chrXV	402678	402678	+	3UTR	CYC2	YOR037W	sense	402678	402704	26	6.34253	3.04441	14	5	4.23641
chrXV	402817	402816	+	3UTR	CYC2	YOR037W	sense	402788	402831	43	20.8035	11.4166	5	5	5.09693
chrXV	413699	413693	+	3UTR	IRC23	YOR044W	sense	413693	413710	17	18.2665	5.32773	11	9	2.89216
chrXV	414478	414446	+	antisense_CDS	INT_0_7892	INT_0_7892	sense	414283	414539	256	209.811	68.2456	166	91	10.6685
chrXV	430199	430199	+	intergenic_region	INT_0_7905	INT_0_7905	sense	430196	430206	10	7.86474	3.29812	2	4	7.61104
chrXV	438910	438886	+	antisense_CDS	INT_0_7913	INT_0_7913	sense	438724	438992	268	66.4697	4.82032	123	57	12.5648
chrXV	446123	446123	+	CUTs	CUT377	ST3128	sense	446096	446139	43	6.34253	2.02961	29	5	6.08883
chrXV	447116	447116	+	5UTR	CUT377	ST3128	sense	447065	447177	112	11.1629	2.02961	65	14	4.55414
chrXV	447237	447233	+	5UTR	CYT1	YOR065W	sense	447215	447332	117	11.4166	3.55182	38	14	9.3201
chrXV	451702	451702	+	intergenic_region	INT_0_7925	INT_0_7925	sense	451702	451748	46	3.29812	2.02961	26	4	3.04441
chrXV	484769	484769	+	antisense_CDS	INT_0_7950	INT_0_7950	sense	484759	484780	21	5.83513	3.80552	11	4	5.58143
chrXV	487375	487373	+	tRNA_100_nt_upstream	INT_0_7950	INT_0_7950	sense	487355	487380	25	12.4314	2.28331	9	10	12.1777
chrXV	494927	494932	+	3UTR	TMA46	YOR091W	sense	494814	495068	254	90.825	26.8923	92	53	3.7704
chrXV	507111	507111	+	SUTs	XUT_15F-249	572980	sense	507087	507118	31	4.05922	2.02961	6	3	3.29812
chrXV	515259	515283	+	CDS	RAS1	YOR101W	sense	515174	515434	260	46.4273	2.02961	150	74	45.9199
chrXV	516456	516489	+	3UTR	RAS1	YOR101W	sense	516432	516558	126	33.7423	5.32773	43	16	2.85309
chrXV	520359	520358	+	intergenic_region	INT_0_7977	INT_0_7977	sense	520355	520375	20	2.79071	2.02961	6	2	2.53701
chrXV	522691	522690	+	3UTR	RGS2	YOR107W	sense	522687	522705	18	8.62584	2.53701	2	4	8.11844
chrXV	528810	528802	+	3UTR	INP53	YOR109W	sense	528797	528810	13	21.0572	12.9388	4	5	2.60702
chrXV	544835	544832	+	intergenic_region	INT_0_7989	INT_0_7989	sense	544785	544876	91	26.8923	5.32773	17	15	22.2411
chrXV	546467	546456	+	3UTR	RPT5	YOR117W	sense	546444	546490	46	134.715	43.6366	23	19	2.18881
chrXV	546539	546539	+	intergenic_region	INT_0_7992	INT_0_7992	sense	546539	546556	17	3.80552	2.53701	5	3	3.55182
chrXV	552232	552230	+	3UTR	GCY1	YOR120W	sense	552213	552257	44	43.1292	13.4462	12	9	6.88416
chrXV	564368	564368	+	3UTR	RGA1	YOR127W	sense	564368	564369	1	3.80552	2.53701	0	2	2.53701
chrXV	564397	564406	+	intergenic_region	INT_0_8008	INT_0_8008	sense	564397	564444	47	26.1312	6.84993	36	7	2.63484
chrXV	571885	571885	+	tRNA_100_nt_upstream	XUT_15F-269	572983	sense	571882	571896	14	3.55182	2.02961	4	3	3.29812
chrXV	577942	577935	+	5UTR	BAG7	YOR134W	sense	577932	578007	75	22.8331	8.37214	33	15	6.73286
chrXV	578396	578408	+	5UTR	BAG7	YOR134W	sense	578356	578445	89	18.5202	6.08883	30	11	4.76596
chrXV	578574	578532	+	CDS	BAG7	YOR134W	sense	578479	578623	144	59.8735	11.4166	94	31	24.8889
chrXV	580100	580094	+	3UTR	BAG7	YOR134W	sense	580081	580111	30	25.1164	7.61104	18	10	10.3792
chrXV	580163	580164	+	3UTR	BAG7	YOR134W	sense	580162	580177	15	13.1925	7.10363	4	4	12.9388
chrXV	580244	580244	+	5UTR	INT_0_8019	INT_0_8019	sense	580228	580375	147	13.1925	2.28331	108	22	12.9388
chrXV	581635	581632	+	3UTR	INT_0_8022	INT_0_8022	sense	581632	581652	20	29.4293	20.8035	4	3	2.76811
chrXV	600770	600766	+	intergenic_region	INT_0_8032	INT_0_8032	sense	600713	600797	84	30.6979	6.08883	43	17	7.41371
chrXV	600910	600908	+	intergenic_region	INT_0_8032	INT_0_8032	sense	600904	600928	24	9.13324	5.07402	5	3	8.87954
chrXV	609636	609634	+	intergenic_region	INT_0_8038	INT_0_8038	sense	609632	609663	31	5.83513	3.04441	3	2	3.32861
chrXV	618108	618108	+	XUTs	XUT_15F-288	572986	sense	618095	618145	50	5.32773	2.28331	21	7	5.07402
chrXV	626639	626632	+	3UTR	SLP1	YOR154W	sense	626629	626639	10	5.32773	2.53701	6	3	2.79071
chrXV	647155	647158	+	antisense_CDS	INT_0_8066	INT_0_8066	sense	647132	647208	76	27.146	6.08883	7	9	4.49059
chrXV	651907	651907	+	CDS	YOR170W	YOR170W	sense	651905	651927	22	6.84993	5.32773	1	2	6.08883
chrXV	659765	659765	+	3UTR	MED4	YOR174W	sense	659765	659815	50	6.34253	2.53701	27	6	4.87187
chrXV	670712	670712	+	intergenic_region	INT_0_8085	INT_0_8085	sense	670595	670713	118	13.1925	3.55182	78	14	5.00666
chrXV	685562	685570	+	3UTR	TUF1	YOR187W	sense	685517	685590	73	30.9516	11.6703	22	15	3.66147
chrXV	689461	689461	+	intergenic_region	INT_0_8104	INT_0_8104	sense	689461	689462	1	2.02961	2.02961	-1	1	2.02961
chrXV	692181	692153	+	3UTR	SPR1	YOR190W	sense	692152	692188	36	15.4758	4.82032	33	13	3.30191
chrXV	692292	692292	+	3UTR	SPR1	YOR190W	sense	692277	692304	27	4.05922	2.28331	13	4	3.55182
chrXV	710133	710107	+	tRNA_100_nt_upstream	INT_0_8111	INT_0_8111	sense	710073	710145	72	30.4441	5.58143	59	29	9.69485
chrXV	725046	725046	+	3UTR	DED1	YOR204W	sense	725017	725051	34	7.61104	3.80552	9	5	7.35734
chrXV	736296	736303	+	3UTR	PTP2	YOR208W	sense	736284	736348	64	28.4145	13.9536	11	7	4.0538
chrXV	738901	738906	+	intergenic_region	INT_0_8130	INT_0_8130	sense	738850	738972	122	93.6158	21.8183	47	27	5.26688
chrXV	745580	745587	+	intergenic_region	INT_0_8135	INT_0_8135	sense	745520	745613	93	19.2813	5.58143	11	9	3.97163
chrXV	745891	745887	+	antisense_CDS	INT_0_8135	INT_0_8135	sense	745847	745920	73	12.6851	5.32773	24	7	12.4314
chrXV	749781	749781	+	CDS	RFC1	YOR217W	sense	749763	749791	28	8.11844	4.05922	11	6	7.86474
chrXV	753049	753049	+	antisense_CDS	INT_0_8138	INT_0_8138	sense	753038	753071	33	9.38695	6.08883	9	3	8.87954
chrXV	756296	756391	+	3UTR	RCN2	YOR220W	sense	756259	756476	217	331.841	101.988	44	21	2.83883
chrXV	758408	758408	+	CDS	ODC2	YOR222W	sense	758383	758674	291	20.5498	2.53701	188	43	9.41424
chrXV	770084	770088	+	3UTR	WTM2	YOR229W	sense	770083	770089	6	6.84993	3.29812	3	3	4.08511
chrXV	772311	772317	+	3UTR	WTM1	YOR230W	sense	772310	772384	74	27.9071	9.13324	20	12	7.21513
chrXV	775516	775516	+	intergenic_region	INT_0_8159	INT_0_8159	sense	775513	775548	35	9.64065	4.82032	3	4	3.56243
chrXV	778546	778546	+	intergenic_region	INT_0_8161	INT_0_8161	sense	778546	778555	9	3.04441	2.53701	-1	1	2.79071
chrXV	780595	780577	+	snoRNA	SNR17A	snR17a	sense	780467	780659	192	88.5417	15.7295	76	53	4.55021
chrXV	783391	783391	+	intergenic_region	INT_0_8166	INT_0_8166	sense	783391	783396	5	3.29812	2.79071	-1	1	3.04441
chrXV	788894	788961	+	antisense_CDS	INT_0_8170	INT_0_8170	sense	788882	789028	146	49.218	9.13324	91	32	3.14472
chrXV	798702	798693	+	antisense_CDS	INT_0_8176	INT_0_8176	sense	798605	798740	135	227.57	93.3621	28	19	5.02093
chrXV	798837	798837	+	antisense_CDS	INT_0_8176	INT_0_8176	sense	798832	798901	69	5.58143	2.02961	51	10	5.32773
chrXV	811571	811567	+	intergenic_region	INT_0_8187	INT_0_8187	sense	811567	811571	4	6.84993	3.29812	3	5	2.47124
chrXV	816181	816160	+	antisense_CDS	INT_0_8191	INT_0_8191	sense	816122	816198	76	30.6979	8.62584	52	19	12.7092
chrXV	818497	818497	+	intergenic_region	INT_0_8193	INT_0_8193	sense	818490	818503	13	4.31292	2.53701	1	3	4.05922
chrXV	826272	826268	+	CUTs	CUT389	ST3246	sense	826073	826500	427	57.8439	2.28331	212	104	57.5902
chrXV	832611	832617	+	snoRNA_1000_nt_downstream	INT_0_8205	INT_0_8205	sense	832521	833018	497	1132.27	99.1972	184	151	81.4778
chrXV	839415	839379	+	antisense_CDS	INT_0_8209	INT_0_8209	sense	839367	839485	118	20.8035	5.83513	54	17	3.89942
chrXV	842794	842807	+	snoRNA_1000_nt_downstream	INT_0_8213	INT_0_8213	sense	842599	843162	563	1515.86	120.254	168	155	90.3868
chrXV	850130	850127	+	3UTR	RDL1	YOR285W	sense	850127	850130	3	14.7147	9.89435	2	4	2.51537
chrXV	850210	850220	+	intergenic_region	INT_0_8223	INT_0_8223	sense	850206	850256	50	38.8163	8.87954	29	17	8.82585
chrXV	850974	850978	+	3UTR	INT_0_8224	INT_0_8224	sense	850971	850999	28	133.954	96.4065	3	5	4.01544
chrXV	868138	868145	+	antisense_CDS	INT_0_8232	INT_0_8232	sense	868130	868199	69	35.5182	6.84993	29	20	5.88861
chrXV	869163	869163	+	5UTR	INT_0_8234	INT_0_8234	sense	869160	869213	53	8.11844	2.02961	24	9	7.86474
chrXV	880757	880757	+	CDS	YOR300W	YOR300W	sense	880757	880759	2	3.04441	2.79071	-1	1	2.79071
chrXV	884212	884209	+	3UTR	CPA1	YOR303W	sense	884209	884213	4	17.5054	6.59623	2	4	2.02192
chrXV	891653	891653	+	SUTs	SUT379	ST3271	sense	891633	891672	39	5.07402	2.02961	20	5	4.02459
chrXV	923191	923191	+	CUTs	CUT393	ST3280	sense	923165	923381	216	18.5202	3.04441	145	27	9.53192
chrXV	929556	929556	+	CDS	MYO2	YOR326W	sense	929551	929593	42	6.84993	3.80552	14	5	6.59623
chrXV	930680	930679	+	intergenic_region	INT_0_8279	INT_0_8279	sense	930678	930680	2	5.83513	3.55182	0	2	2.28331
chrXV	930814	930782	+	antisense_CDS	INT_0_8279	INT_0_8279	sense	930682	930947	265	77.6326	8.87954	160	59	4.19514
chrXV	931787	931787	+	5UTR	INT_0_8280	INT_0_8280	antisense	931731	931788	57	5.07402	2.79071	19	5	5.07402
chrXV	949634	949634	+	intergenic_region	INT_0_8290	INT_0_8290	sense	949631	949644	13	9.89435	4.31292	8	6	9.64065
chrXV	966321	966327	+	intergenic_region	INT_0_8300	INT_0_8300	sense	966272	966356	84	100.466	15.9832	61	31	2.49015
chrXV	966585	966591	+	intergenic_region	INT_0_8300	INT_0_8300	sense	966546	966647	101	15.7295	3.80552	43	11	7.17836
chrXV	976353	976353	+	tRNA_100_nt_upstream	INT_0_8307	INT_0_8307	sense	976335	976381	46	5.83513	2.79071	11	5	5.32773
chrXV	976499	976496	+	tRNA_100_nt_downstream	INT_0_8308	INT_0_8308	sense	976453	976511	58	38.3089	5.32773	25	20	38.0552
chrXV	980773	980773	+	tRNA	tP(UGG)O3	tP(UGG)O3	sense	980720	980805	85	33.7423	3.29812	37	30	33.4886
chrXV	992861	992861	+	3UTR	CIN1	YOR349W	sense	992861	992883	22	11.4166	4.56662	13	7	2.27707
chrXV	995178	995178	+	CUTs	XUT_15F-448	573001	sense	995149	995183	34	5.32773	2.02961	20	7	4.56662
chrXV	1004168	1004168	+	SUTs	SUT388	ST3302	sense	1004143	1004261	118	13.1925	3.55182	61	17	12.6851
chrXV	1025641	1025653	+	3UTR	YOR366W	YOR366W	sense	1025630	1025689	59	21.5646	8.37214	29	11	6.84343
chrXV	1039469	1039469	+	3UTR	INT_0_8356	INT_0_8356	antisense	1039469	1039482	13	5.32773	3.04441	8	3	2.5721
chrXV	1048141	1048155	+	3UTR	ATF1	YOR377W	sense	1048107	1048244	137	50.2328	23.0868	63	21	7.19459
chrXV	1059045	1059042	+	3UTR	YOR381W-A	YOR381W-A	sense	1059042	1059083	41	10.6555	4.05922	3	5	5.4279
chrXV	1066197	1066195	+	3UTR	YOR385W	YOR385W	sense	1066195	1066210	15	155.011	107.062	10	12	2.04367
chrXV	1066453	1066369	+	3UTR	YOR385W	YOR385W	sense	1066217	1066453	236	337.676	47.4421	200	83	6.58485
chrIX	24163	24163	+	XUTs	XUT_9F-4	572304	sense	24162	24170	8	7.86474	3.29812	6	4	5.07402
chrIX	28588	28596	+	intergenic_region	INT_0_2200	INT_0_2200	sense	28447	28801	354	86.2584	28.6682	152	62	8.34966
chrIX	41506	41509	+	3UTR	YIL161W	YIL161W	sense	41506	41575	69	21.0572	11.924	21	8	3.06383
chrIX	48094	48094	+	3UTR	YIL156W-B	YIL156W-B	sense	48094	48220	126	13.9536	2.79071	85	22	2.7234
chrIX	85051	85058	+	intergenic_region	INT_0_2238	INT_0_2238	sense	85020	85069	49	9.13324	3.55182	21	5	5.29551
chrIX	95010	95007	+	intergenic_region	INT_0_2244	INT_0_2244	sense	94979	95015	36	38.3089	14.2073	8	5	6.76904
chrIX	96976	96974	+	snoRNA_300_nt_upstream	INT_0_2244	INT_0_2244	sense	96944	97014	70	383.343	192.306	14	16	266.541
chrIX	97268	97247	+	snoRNA_1000_nt_downstream	FLX1	YIL134W	sense	97246	97268	22	52.0088	21.5646	20	11	15.8865
chrIX	97443	97439	+	snoRNA_1000_nt_downstream	FLX1	YIL134W	sense	97289	97920	631	284.145	8.11844	291	211	131.682
chrIX	98418	98503	+	3UTR	FLX1	YIL134W	sense	98330	98728	398	70.0215	5.83513	304	86	8.56626
chrIX	127641	127641	+	5UTR	INT_0_2265	INT_0_2265	sense	127641	127705	64	5.83513	2.02961	44	9	5.58143
chrIX	144243	144243	+	intergenic_region	INT_0_2278	INT_0_2278	sense	144243	144247	4	3.80552	3.04441	0	2	3.55182
chrIX	165974	165974	+	intergenic_region	INT_0_2292	INT_0_2292	sense	165953	166049	96	8.87954	2.28331	56	10	5.14421
chrIX	167753	167753	+	CDS	YIL105W-A	YIL105W-A	sense	167726	167787	61	10.148	2.79071	26	10	9.89435
chrIX	173141	173141	+	3UTR	DPH1	YIL103W	sense	173141	173148	7	3.29812	2.53701	4	2	3.04441
chrIX	177834	177834	+	intergenic_region	INT_0_2306	INT_0_2306	sense	177806	177857	51	8.11844	2.28331	19	10	7.86474
chrIX	203201	203201	+	CUTs	CUT189	ST1621	sense	203171	203240	69	8.87954	2.28331	51	14	8.62584
chrIX	214976	214976	+	intergenic_region	INT_0_2336	INT_0_2336	sense	214942	214979	37	5.32773	2.02961	5	3	4.05922
chrIX	217764	217766	+	intergenic_region	INT_0_2339	INT_0_2339	sense	217744	217846	102	37.0404	10.6555	56	17	3.7456
chrIX	241064	241059	+	intergenic_region	INT_0_2355	INT_0_2355	sense	241056	241064	8	31.9664	10.148	5	7	2.33546
chrIX	248937	248936	+	tRNA_100_nt_downstream	INT_0_2369	INT_0_2369	sense	248900	248949	49	28.4145	4.56662	24	12	28.1608
chrIX	252152	252152	+	antisense_CDS	INT_0_2371	INT_0_2371	sense	252152	252159	7	2.28331	2.02961	-1	1	2.02961
chrIX	261004	261004	+	3UTR	DFG10	YIL049W	sense	260999	261070	71	6.08883	2.02961	52	10	4.87187
chrIX	268412	268412	+	CDS	YIL046W-A	YIL046W-A	sense	268412	268414	2	2.28331	2.02961	-1	1	2.02961
chrIX	275073	275073	+	intergenic_region	INT_0_2389	INT_0_2389	sense	275073	275101	28	7.10363	5.83513	-1	1	6.84993
chrIX	280079	280063	+	intergenic_region	INT_0_2395	INT_0_2395	sense	280059	280082	23	12.4314	3.55182	15	10	5.64854
chrIX	287749	287740	+	intergenic_region	INT_0_2400	INT_0_2400	sense	287664	287765	101	60.3809	25.8775	52	21	13.9448
chrIX	292275	292275	+	SUTs	XUT_9F-139	572334	sense	292237	292290	53	19.535	5.58143	12	13	8.04917
chrIX	303667	303664	+	3UTR	YIL028W	YIL028W	sense	303660	303713	53	18.2665	6.08883	14	6	7.51962
chrIX	310915	310915	+	intergenic_region	INT_0_2414	INT_0_2414	sense	310847	310928	81	6.84993	3.80552	37	7	6.59623
chrIX	314826	314826	+	intergenic_region	INT_0_2421	INT_0_2421	sense	314804	314833	29	7.10363	2.02961	8	7	6.84993
chrIX	318186	318186	+	intergenic_region	INT_0_2424	INT_0_2424	sense	318186	318200	14	4.82032	2.02961	13	5	3.04441
chrIX	333635	333635	+	3UTR	YIL012W	YIL012W	sense	333600	333677	77	18.0128	3.55182	30	18	17.7591
chrIX	335771	335771	+	antisense_CDS	INT_0_2439	INT_0_2439	sense	335763	335778	15	5.58143	2.02961	6	5	5.32773
chrIX	343045	343045	+	antisense_CDS	INT_0_2446	INT_0_2446	sense	343042	343068	26	7.35734	2.02961	18	7	5.93097
chrIX	350091	350091	+	3UTR	CFD1	YIL003W	sense	350088	350105	17	7.61104	3.29812	13	3	2.8747
chrIX	355593	355602	+	3UTR	YIL001W	YIL001W	sense	355551	355619	68	18.2665	2.79071	37	17	6.26635
chrIX	388457	388452	+	SUTs	XUT_9F-189	572341	sense	388452	388457	5	7.10363	3.55182	4	3	3.55182
chrIX	398440	398439	+	3UTR	MRS1	YIR021W	sense	398436	398440	4	47.6958	42.3681	-1	1	4.44823
chrIX	398484	398483	+	3UTR	MRS1	YIR021W	sense	398464	398558	94	10.4018	3.29812	31	9	10.148
chrIX	399700	399700	+	intergenic_region	INT_0_2493	INT_0_2493	sense	399694	399704	10	4.56662	2.53701	3	3	3.29812
chrIX	402738	402738	+	3UTR	DAL81	YIR023W	sense	402738	402751	13	5.58143	3.04441	12	6	2.00053
chrIX	402808	402808	+	3UTR	INT_0_2496	INT_0_2496	sense	402806	402838	32	5.07402	3.04441	9	5	3.35382
chrIX	406217	406217	+	intergenic_region	INT_0_2498	INT_0_2498	sense	406202	406218	16	4.05922	2.02961	4	3	4.05922
chrXI	38708	38705	+	snoRNA_300_nt_upstream	INT_0_5039	INT_0_5039	sense	38684	38758	74	61.142	26.6386	19	16	60.8883
chrXI	39095	39081	+	snoRNA_1000_nt_downstream	CUT226	ST1920	sense	38901	39407	506	634.761	19.7887	261	192	71.5896
chrXI	55929	55929	+	intergenic_region	INT_0_5051	INT_0_5051	sense	55929	55945	16	7.61104	6.84993	-1	1	7.10363
chrXI	67591	67592	+	SUTs	SUT221	ST1926	sense	67563	67603	40	19.0276	7.61104	22	10	18.7739
chrXI	67765	67763	+	XUTs	SUT221	ST1926	sense	67655	67788	133	82.4529	21.0572	72	30	7.98021
chrXI	74705	74705	+	tRNA_100_nt_downstream	INT_0_5060	INT_0_5060	sense	74699	74726	27	8.11844	2.28331	11	10	7.86474
chrXI	77209	77228	+	intergenic_region	INT_0_5062	INT_0_5062	sense	77202	77337	135	59.3661	16.2369	78	33	5.56028
chrXI	86269	86169	+	antisense_CDS	INT_0_5069	INT_0_5069	sense	86151	86287	136	15.9832	2.53701	112	24	5.0511
chrXI	106990	106981	+	intergenic_region	INT_0_5082	INT_0_5082	sense	106917	107002	85	233.913	65.2012	38	22	2.08426
chrXI	108907	108905	+	intergenic_region	INT_0_5083	INT_0_5083	sense	108777	108933	156	26.8923	5.07402	125	20	3.67155
chrXI	137951	137951	+	XUTs	XUT_11F-58	572480	sense	137946	137964	18	4.05922	2.53701	11	4	3.80552
chrXI	143717	143717	+	5UTR	SUT228	ST1948	sense	143705	143721	16	4.31292	2.02961	10	7	4.05922
chrXI	145750	145749	+	3UTR	PIR3	YKL163W	sense	145748	145756	8	6.84993	4.05922	0	2	2.1182
chrXI	152934	152945	+	XUTs	SUT229	ST1950	sense	152873	153032	159	53.7847	15.9832	107	30	5.32073
chrXI	154888	154889	+	intergenic_region	INT_0_5114	INT_0_5114	sense	154872	155022	150	43.1292	26.1312	31	13	7.45784
chrXI	158437	158439	+	3UTR	APE2	YKL157W	sense	158396	158513	117	20.0424	4.05922	72	16	2.66484
chrXI	166058	166076	+	intergenic_region	INT_0_5124	INT_0_5124	sense	166023	166338	315	192.306	39.8311	157	64	17.4291
chrXI	166443	166449	+	5UTR	MCR1	YKL150W	sense	166375	166569	194	48.2032	5.83513	110	43	25.0213
chrXI	167640	167634	+	antisense_CDS	INT_0_5128	INT_0_5128	sense	167589	167758	169	35.7719	4.05922	94	33	6.73974
chrXI	175803	175796	+	3UTR	YKL145W-A	YKL145W-A	sense	175796	175803	7	30.4441	15.9832	5	5	2.41475
chrXI	176061	176061	+	XUTs	XUT_11F-77	572483	sense	176030	176062	32	9.38695	2.79071	24	8	9.13324
chrXI	176579	176571	+	intergenic_region	XUT_11F-77	572483	sense	176532	176717	185	131.671	26.6386	42	24	9.14358
chrXI	178523	178519	+	3UTR	LTV1	YKL143W	sense	178494	178611	117	24.1016	8.62584	63	19	4.14815
chrXI	179338	179337	+	3UTR	CUT227	ST1961	sense	179338	179354	16	4.05922	3.55182	-1	1	3.80552
chrXI	190673	190675	+	antisense_CDS	INT_0_5146	INT_0_5146	sense	190616	190683	67	8.37214	3.04441	24	5	7.86474
chrXI	196365	196365	+	XUTs	XUT_11F-88	572486	sense	196345	196380	35	4.31292	2.28331	8	3	3.80552
chrXI	197656	197656	+	antisense_CDS	INT_0_5153	INT_0_5153	sense	197614	197686	72	10.6555	8.11844	4	2	6.05201
chrXI	210521	210521	+	5UTR	INT_0_5161	INT_0_5161	sense	210496	210545	49	15.2221	4.82032	34	9	5.68064
chrXI	218604	218599	+	antisense_CDS	INT_0_5166	INT_0_5166	sense	218587	218630	43	77.3789	35.2645	17	16	6.57075
chrXI	219826	219827	+	tRNA_100_nt_upstream	INT_0_5168	INT_0_5168	sense	219812	219850	38	6.84993	2.02961	7	5	6.59623
chrXI	221137	221136	+	3UTR	SBA1	YKL117W	sense	221136	221137	1	7.61104	5.58143	0	2	2.02961
chrXI	221225	221226	+	intergenic_region	INT_0_5170	INT_0_5170	sense	221205	221287	82	43.3829	19.0276	23	13	6.20853
chrXI	226119	226135	+	intergenic_region	INT_0_5173	INT_0_5173	sense	226119	226159	40	9.38695	2.79071	31	7	9.13324
chrXI	243097	243097	+	intergenic_region	INT_0_5185	INT_0_5185	sense	243097	243103	6	2.28331	2.02961	-1	1	2.02961
chrXI	248882	248884	+	5UTR	HSL1	YKL101W	sense	248871	248916	45	40.3385	14.461	9	8	5.36384
chrXI	258045	258045	+	3UTR	MTC2	YKL098W	sense	257956	258088	132	33.7423	9.89435	95	15	4.50972
chrXI	262215	262215	+	5UTR	INT_0_5203	INT_0_5203	sense	262193	262225	32	3.80552	2.02961	22	5	3.55182
chrXI	265963	265963	+	3UTR	MBR1	YKL093W	sense	265963	265969	6	5.07402	3.04441	4	3	4.82032
chrXI	273370	273387	+	3UTR	CUE2	YKL090W	sense	273350	273404	54	73.5734	16.7443	17	18	2.50017
chrXI	277250	277244	+	3UTR	INT_0_5213	INT_0_5213	sense	277239	277281	42	10.148	3.80552	21	5	4.1305
chrXI	283414	283411	+	snoRNA_1000_nt_downstream	YKL081W_intron	intergenic	sense	283268	283438	170	538.354	104.018	16	18	74.8785
chrXI	292946	292956	+	3UTR	YKL077W	YKL077W	sense	292940	292975	35	21.5646	5.83513	12	10	2.86982
chrXI	302459	302491	+	3UTR	STB6	YKL072W	sense	302458	302524	66	15.9832	2.28331	41	14	2.73601
chrXI	303161	303161	+	intergenic_region	INT_0_5232	INT_0_5232	sense	303064	303247	183	34.5034	3.04441	95	51	23.8298
chrXI	315500	315500	+	3UTR	YKL066W	YKL066W	sense	315495	315520	25	8.37214	2.53701	13	8	3.28322
chrXI	321450	321450	+	3UTR	MNR2	YKL064W	sense	321450	321461	11	13.4462	9.64065	3	5	6.88416
chrXI	328242	328249	+	CUTs	CUT231	ST2015	sense	328188	328276	88	20.8035	3.55182	26	19	20.5498
chrXI	329578	329576	+	intergenic_region	INT_0_5260	INT_0_5260	sense	329532	329579	47	9.13324	3.04441	11	7	8.87954
chrXI	336400	336400	+	intergenic_region	INT_0_5267	INT_0_5267	sense	336383	336421	38	9.89435	3.55182	18	9	9.64065
chrXI	342778	342805	+	3UTR	INT_0_5274	INT_0_5274	sense	342775	343017	242	28.1608	4.05922	150	44	7.76675
chrXI	364678	364679	+	snoRNA_300_nt_upstream	CUT234	ST2027	sense	364632	364733	101	55.0532	13.6999	49	25	54.2921
chrXI	365063	365083	+	snoRNA_1000_nt_downstream	INT_0_5290	INT_0_5290	sense	364877	365339	462	253.194	6.34253	374	254	131.991
chrXI	365484	365426	+	snoRNA_1000_nt_downstream	INT_0_5290	INT_0_5290	sense	365367	365912	545	120.508	3.80552	291	154	120.254
chrXI	366967	366967	+	CDS	RGT1	YKL038W	sense	366908	367006	98	11.4166	4.56662	23	10	11.1629
chrXI	369282	369281	+	3UTR	RGT1	YKL038W	sense	369271	369322	51	94.8843	21.0572	18	15	3.65782
chrXI	369398	369398	+	CDS	AIM26	YKL037W	sense	369382	369436	54	13.6999	7.10363	7	6	13.4462
chrXI	371559	371559	+	3UTR	UGP1	YKL035W	sense	371559	371561	2	3.55182	2.02961	1	3	2.33002
chrXI	374217	374204	+	3UTR	TUL1	YKL034W	sense	374192	374220	28	15.4758	3.55182	15	9	2.16057
chrXI	375365	375356	+	intergenic_region	INT_0_5297	INT_0_5297	sense	375349	375405	56	60.1272	20.0424	12	10	3.0727
chrXI	379927	379927	+	intergenic_region	INT_0_5299	INT_0_5299	sense	379924	380075	151	20.2961	4.56662	82	25	3.34676
chrXI	389134	389134	+	CUTs	CUT235	ST2037	sense	389134	389191	57	4.05922	2.28331	20	4	3.80552
chrXI	395972	395972	+	3UTR	YKL023W	YKL023W	sense	395961	395991	30	9.89435	6.08883	11	4	4.47176
chrXI	420289	420289	+	CUTs	CUT237	ST2044	sense	420283	420293	10	3.04441	2.53701	-1	1	2.79071
chrXI	427295	427295	+	antisense_CDS	INT_0_5328	INT_0_5328	sense	427260	427300	40	9.64065	8.11844	-1	1	9.38695
chrXI	430721	430718	+	intergenic_region	INT_0_5331	INT_0_5331	sense	430706	430736	30	10.4018	3.55182	7	8	10.148
chrXI	432759	432753	+	3UTR	RPL14A	YKL006W	sense	432725	432765	40	32.2201	7.86474	15	13	2.7859
chrXI	436984	436979	+	intergenic_region	INT_0_5338	INT_0_5338	sense	436972	436997	25	13.4462	5.83513	17	7	5.64854
chrXI	447696	447738	+	SUTs	SUT235	ST2053	sense	447678	447831	153	22.3257	4.05922	79	18	22.072
chrXI	454331	454326	+	intergenic_region	INT_0_5351	INT_0_5351	sense	454318	454359	41	12.6851	4.82032	11	5	12.4314
chrXI	457216	457216	+	intergenic_region	INT_0_5352	INT_0_5352	sense	457213	457233	20	4.05922	2.53701	4	4	3.55182
chrXI	457649	457649	+	intergenic_region	INT_0_5352	INT_0_5352	sense	457649	457680	31	5.07402	2.79071	4	4	4.82032
chrXI	463944	463951	+	5UTR	PRY2	YKR013W	sense	463942	464109	167	24.1016	3.55182	89	29	19.9111
chrXI	471607	471614	+	3UTR	FCJ1	YKR016W	sense	471601	471627	26	17.7591	9.38695	6	3	2.21449
chrXI	473661	473661	+	intergenic_region	INT_0_5364	INT_0_5364	sense	473661	473662	1	2.53701	2.53701	-1	1	2.53701
chrXI	490385	490315	+	CUTs	CUT241	ST2067	sense	490063	490510	447	101.48	2.28331	286	150	23.4768
chrXI	493755	493753	+	3UTR	BCH2	YKR027W	sense	493753	493755	2	35.2645	32.2201	-1	1	3.04441
chrXI	517040	517038	+	3UTR	INT_0_5395	INT_0_5395	antisense	517039	517040	1	9.89435	7.86474	0	2	2.02961
chrXI	526855	526855	+	5UTR	INT_0_5408	INT_0_5408	sense	526829	526894	65	11.6703	7.35734	13	6	11.4166
chrXI	532343	532343	+	3UTR	MRS4	YKR052C	antisense	532295	532344	49	16.7443	7.35734	45	11	3.17731
chrXI	536428	536428	+	antisense_CDS	XUT_11F-231	572508	sense	536423	536437	14	4.05922	2.79071	1	2	3.80552
chrXI	536525	536525	+	antisense_CDS	INT_0_5418	INT_0_5418	sense	536516	536531	15	4.05922	2.02961	8	4	3.80552
chrXI	556456	556456	+	intergenic_region	INT_0_5424	INT_0_5424	sense	556452	556497	45	70.0215	36.7867	2	2	5.29551
chrXI	556537	556532	+	CDS	UTP30	YKR060W	sense	556521	556541	20	12.6851	4.56662	9	8	12.4314
chrXI	559159	559163	+	intergenic_region	INT_0_5427	INT_0_5427	sense	559114	559188	74	14.2073	2.28331	42	14	9.70843
chrXI	577291	577291	+	antisense_CDS	INT_0_5440	INT_0_5440	sense	577211	577438	227	18.0128	5.83513	141	31	8.23746
chrXI	580823	580836	+	3UTR	YKR075W-A	YKR075W-A	sense	580758	580937	179	36.533	6.34253	92	36	12.621
chrXI	596348	596342	+	3UTR	NUP133	YKR082W	sense	596342	596348	6	7.35734	3.29812	5	4	2.1182
chrXI	596396	596396	+	3UTR	INT_0_5460	INT_0_5460	sense	596396	596400	4	4.05922	2.53701	3	3	2.79071
chrXI	603259	603237	+	3UTR	PRP16	YKR086W	sense	603235	603298	63	16.4906	3.80552	53	15	2.05402
chrXI	604553	604553	+	CUTs	CUT245	ST2105	sense	604501	604737	236	22.5794	4.05922	145	36	22.3257
chrXI	612444	612444	+	intergenic_region	INT_0_5473	INT_0_5473	sense	612419	612484	65	24.3553	11.924	15	10	7.18676
chrXI	612540	612538	+	intergenic_region	INT_0_5473	INT_0_5473	sense	612514	612561	47	23.0868	5.32773	14	12	22.8331
chrXI	615681	615676	+	5UTR	PTR2	YKR093W	sense	615548	615733	185	43.3829	10.9092	117	42	4.28684
chrXI	645820	645820	+	intergenic_region	INT_0_5492	INT_0_5492	sense	645820	645823	3	2.28331	2.02961	-1	1	2.02961
chrXI	658283	658283	+	intergenic_region	INT_0_5496	INT_0_5496	sense	658283	658307	24	7.86474	4.56662	16	7	7.61104
chrXI	665394	665394	+	intergenic	intergenic	intergenic	sense	665368	665397	29	9.89435	2.53701	22	9	5.03073
chrXI	665482	665482	+	intergenic	intergenic	intergenic	sense	665478	665483	5	3.29812	2.79071	-1	1	3.29812
chrVI	7645	7645	+	intergenic_region	INT_0_3003	INT_0_3003	sense	7645	7659	14	12.9388	10.148	1	2	12.6851
chrVI	19616	19616	+	intergenic_region	INT_0_3010	INT_0_3010	sense	19602	19630	28	5.07402	2.79071	21	3	4.82032
chrVI	20526	20526	+	intergenic_region	INT_0_3011	INT_0_3011	sense	20507	20533	26	10.6555	7.35734	2	3	10.4018
chrVI	32867	32860	+	intergenic_region	INT_0_3020	INT_0_3020	sense	32858	32951	93	10.4018	3.29812	45	7	8.47281
chrVI	38926	38927	+	antisense_CDS	INT_0_3022	INT_0_3022	sense	38902	38958	56	17.2517	7.35734	22	10	8.86998
chrVI	48985	48987	+	3UTR	YFL041W-A	YFL041W-A	sense	48968	49005	37	43.6366	31.459	2	3	2.16924
chrVI	55077	55077	+	SUTs	SUT101	ST0982	sense	55077	55080	3	2.53701	2.02961	1	2	2.28331
chrVI	73367	73367	+	antisense_CDS	INT_0_3041	INT_0_3041	sense	73344	73388	44	4.31292	2.02961	31	6	4.05922
chrVI	74661	74661	+	intergenic_region	INT_0_3041	INT_0_3041	sense	74661	74680	19	14.7147	7.61104	3	3	4.23641
chrVI	90977	90977	+	5UTR	BUD27	YFL023W	sense	90969	91016	47	8.87954	5.83513	17	5	8.62584
chrVI	101483	101474	+	tRNA_100_nt_downstream	INT_0_3064	INT_0_3064	sense	101419	101495	76	32.2201	3.55182	39	31	31.9664
chrVI	110569	110568	+	5UTR	SUT105	ST0998	sense	110397	110701	304	59.8735	9.64065	105	47	9.91319
chrVI	126608	126608	+	CDS	BLM10	YFL007W	sense	126608	126637	29	3.80552	2.02961	9	3	3.55182
chrVI	134464	134458	+	3UTR	VTC2	YFL004W	sense	134458	134464	6	10.9092	5.58143	5	5	2.22411
chrVI	134591	134583	+	antisense_CDS	INT_0_3092	INT_0_3092	sense	134505	134600	95	36.7867	14.9684	65	15	3.38913
chrVI	135405	135409	+	XUTs	XUT_6F-62	572043	sense	135391	135465	74	24.3553	5.83513	31	19	20.1229
chrVI	143922	143922	+	intergenic_region	INT_0_3096	INT_0_3096	sense	143922	143930	8	5.58143	5.07402	-1	1	5.32773
chrVI	144064	144064	+	intergenic_region	INT_0_3096	INT_0_3096	sense	144064	144086	22	5.32773	3.29812	9	3	5.07402
chrVI	154415	154412	+	3UTR	INT_0_3103	INT_0_3103	sense	154412	154432	20	24.609	14.9684	3	5	2.54184
chrVI	161649	161649	+	3UTR	FAR7	YFR008W	sense	161634	161689	55	7.35734	4.31292	39	5	5.29551
chrVI	191406	191395	+	3UTR	INT_0_3126	INT_0_3126	antisense	191396	191406	10	13.4462	9.13324	9	6	2.5721
chrVI	191454	191450	+	3UTR	INT_0_3126	INT_0_3126	antisense	191433	191482	49	9.13324	2.79071	22	9	4.00105
chrVI	193825	193822	+	3UTR	YFR020W	YFR020W	sense	193819	193825	6	11.4166	4.31292	4	4	3.29498
chrVI	193847	193895	+	3UTR	YFR020W	YFR020W	sense	193829	193929	100	43.6366	20.5498	47	18	3.75099
chrVI	237400	237400	+	antisense_CDS	INT_0_3161	INT_0_3161	sense	237400	237451	51	4.56662	2.02961	27	6	4.31292
chrVI	240003	240008	+	antisense_CDS	INT_0_3163	INT_0_3163	sense	239988	240053	65	12.1777	2.79071	17	6	11.924
chrVI	243334	243334	+	antisense_CDS	INT_0_3167	INT_0_3167	sense	243325	243335	10	2.53701	2.02961	2	2	2.53701
chrVI	253535	253551	+	3UTR	YFR052C-A	YFR052C-A	antisense	253535	253599	64	41.607	9.38695	39	12	7.50581
chrVI	257009	257009	+	SUTs	SUT107	ST1033	sense	256986	257091	105	11.4166	2.53701	61	16	11.1629
chrVI	262270	262270	+	CUTs	CUT123	ST1034	sense	262264	262279	15	2.79071	2.02961	6	2	2.53701
chrVI	265767	265772	+	intergenic_region	INT_0_3186	INT_0_3186	sense	265724	265776	52	38.5626	8.37214	38	21	2.50654
chrXVI	14989	14989	+	intergenic_region	INT_0_8400	INT_0_8400	sense	14988	15053	65	15.4758	2.53701	42	22	14.9684
chrXVI	26221	26237	+	intergenic_region	INT_0_8410	INT_0_8410	sense	26221	26280	59	10.6555	2.79071	40	7	10.4018
chrXVI	30473	30485	+	3UTR	ATP15	YPL271W	sense	30450	30683	233	105.286	18.2665	81	60	3.13192
chrXVI	73282	73282	+	intergenic_region	INT_0_8444	INT_0_8444	sense	73277	73296	19	6.34253	4.05922	6	4	6.08883
chrXVI	73367	73367	+	antisense_CDS	INT_0_8444	INT_0_8444	sense	73363	73396	33	5.58143	3.04441	14	4	5.32773
chrXVI	75597	75442	+	intergenic_region	SUT392	ST3341	sense	75423	75597	174	32.2201	5.32773	152	40	4.49059
chrXVI	79674	79674	+	SUTs	XUT_16F-30	573094	sense	79632	79675	43	16.7443	5.83513	5	4	7.41371
chrXVI	79880	79868	+	SUTs	XUT_16F-30	573094	sense	79842	79905	63	18.0128	3.29812	22	9	17.5054
chrXVI	82668	82648	+	antisense_CDS	INT_0_8455	INT_0_8455	sense	82613	82670	57	15.7295	3.04441	53	13	5.38377
chrXVI	87009	87003	+	3UTR	YPL245W	YPL245W	sense	86990	87042	52	481.779	144.102	9	11	5.0762
chrXVI	96496	96494	+	XUTs	XUT_16F-35	573096	sense	96442	96505	63	24.1016	4.56662	41	18	5.23977
chrXVI	108235	108234	+	3UTR	SSO1	YPL232W	sense	108235	108236	1	5.32773	3.04441	0	2	3.04441
chrXVI	108367	108369	+	intergenic_region	INT_0_8474	INT_0_8474	sense	108315	108389	74	20.5498	12.1777	14	8	10.591
chrXVI	115113	115113	+	5UTR	INT_0_8477	INT_0_8477	sense	115108	115146	38	8.62584	4.82032	20	7	8.37214
chrXVI	125694	125695	+	intergenic_region	INT_0_8484	INT_0_8484	sense	125659	125710	51	27.3997	8.11844	13	8	5.39638
chrXVI	126626	126625	+	intergenic_region	INT_0_8486	INT_0_8486	sense	126601	126743	142	13.9536	3.04441	62	17	8.17021
chrXVI	136583	136624	+	intergenic_region	INT_0_8497	INT_0_8497	sense	136582	136693	111	70.2752	9.64065	80	52	2.68698
chrXVI	139628	139628	+	antisense_CDS	INT_0_8499	INT_0_8499	sense	139506	139665	159	62.9179	11.924	100	32	2.66937
chrXVI	147218	147201	+	3UTR	INT_0_8503	INT_0_8503	antisense	147201	147231	30	12.1777	5.58143	19	5	2.21449
chrXVI	154541	154542	+	antisense_CDS	INT_0_8509	INT_0_8509	sense	154522	154573	51	11.6703	5.07402	22	8	11.1629
chrXVI	162442	162441	+	3UTR	TYW1	YPL207W	sense	162440	162442	2	8.62584	5.83513	0	2	2.79071
chrXVI	163699	163699	+	intergenic_region	INT_0_8514	INT_0_8514	sense	163699	163734	35	7.61104	2.79071	24	10	7.35734
chrXVI	165868	165868	+	3UTR	HRR25	YPL204W	sense	165868	165884	16	4.56662	2.53701	15	2	2.53701
chrXVI	173692	173691	+	snoRNA_300_nt_upstream	YPL198W_intron	intergenic	sense	173626	173788	162	22.072	8.11844	64	22	21.8183
chrXVI	174061	174020	+	snoRNA_1000_nt_downstream	YPL198W_intron	intergenic	sense	173903	174138	235	55.8143	5.83513	137	48	55.5606
chrXVI	176005	176005	+	3UTR	OXR1	YPL196W	sense	175987	176014	27	5.07402	2.79071	17	4	4.82032
chrXVI	179109	179108	+	3UTR	APL5	YPL195W	sense	179109	179111	2	4.05922	3.04441	0	2	2.47124
chrXVI	183170	183174	+	3UTR	RSA1	YPL193W	sense	183145	183272	127	79.9159	21.3109	25	17	4.15697
chrXVI	212930	212933	+	3UTR	CBC2	YPL178W	sense	212925	212961	36	13.1925	5.07402	22	7	3.85816
chrXVI	220559	220570	+	antisense_CDS	INT_0_8566	INT_0_8566	sense	220491	220673	182	38.5626	8.62584	83	20	8.88469
chrXVI	224213	224213	+	intergenic_region	INT_0_8568	INT_0_8568	sense	224201	224222	21	6.08883	3.55182	11	5	5.83513
chrXVI	224334	224334	+	intergenic_region	INT_0_8568	INT_0_8568	sense	224293	224339	46	6.08883	3.04441	39	7	5.83513
chrXVI	250674	250678	+	CUTs	CUT410	ST3401	sense	250664	250704	40	105.793	34.5034	16	13	33.8913
chrXVI	256161	256160	+	3UTR	TGS1	YPL157W	sense	256160	256161	1	10.6555	8.37214	0	2	2.28331
chrXVI	267986	267986	+	5UTR	INT_0_8595	INT_0_8595	sense	267975	268126	151	23.8479	5.32773	106	22	4.92482
chrXVI	283251	283294	+	intergenic_region	INT_0_8606	INT_0_8606	sense	283150	283360	210	62.9179	7.61104	91	33	9.02063
chrXVI	298581	298578	+	antisense_CDS	INT_0_8619	INT_0_8619	sense	298551	298593	42	39.8311	16.4906	15	9	7.18347
chrXVI	304259	304262	+	CUTs	CUT413	ST3418	sense	304243	304292	49	8.37214	2.28331	28	9	8.11844
chrXVI	305096	305096	+	intergenic_region	INT_0_8624	INT_0_8624	sense	305075	305155	80	8.11844	4.56662	18	7	7.86474
chrXVI	306253	306248	+	3UTR	TAF14	YPL129W	sense	306248	306253	5	11.4166	5.58143	4	5	3.04492
chrXVI	306261	306261	+	3UTR	TAF14	YPL129W	sense	306261	306303	42	11.1629	3.29812	7	7	2.78014
chrXVI	313048	313042	+	intergenic_region	INT_0_8628	INT_0_8628	sense	313042	313055	13	7.86474	4.05922	5	3	2.2695
chrXVI	337451	337451	+	3UTR	YPL114W	YPL114W	sense	337436	337482	46	36.0256	20.5498	19	10	4.8172
chrXVI	357904	357904	+	intergenic_region	INT_0_8660	INT_0_8660	sense	357904	357922	18	5.32773	3.04441	17	5	3.38913
chrXVI	364362	364362	+	XUTs	XUT_16F-148	573114	sense	364327	364371	44	7.61104	3.04441	17	5	5.11899
chrXVI	368073	368049	+	3UTR	PNG1	YPL096W	sense	368048	368073	25	11.1629	5.58143	23	5	4.66005
chrXVI	369969	369969	+	CUTs	CUT416	ST3441	sense	369947	369982	35	4.56662	2.02961	17	6	4.31292
chrXVI	375515	375515	+	CDS	GLR1	YPL091W	sense	375515	375539	24	7.61104	3.80552	19	4	2.5595
chrXVI	377211	377206	+	intergenic_region	INT_0_8678	INT_0_8678	sense	377172	377236	64	30.9516	20.2961	37	13	4.74634
chrXVI	384553	384567	+	3UTR	YDC1	YPL087W	sense	384507	384617	110	157.802	77.3789	39	19	2.1148
chrXVI	393751	393751	+	3UTR	INT_0_8686	INT_0_8686	sense	393751	393754	3	2.79071	2.53701	-1	1	2.53701
chrXVI	405507	405649	+	CDS	RPS9A	YPL081W	sense	405492	405884	392	106.808	2.79071	299	152	63.5461
chrXVI	415579	415586	+	3UTR	GCR1	YPL075W	sense	415552	415625	73	149.684	38.8163	8	8	3.8746
chrXVI	418225	418225	+	intergenic_region	INT_0_8702	INT_0_8702	sense	418215	418240	25	3.29812	2.02961	16	3	3.04441
chrXVI	423052	423066	+	3UTR	MUK1	YPL070W	sense	423040	423141	101	28.9219	5.83513	69	26	3.3244
chrXVI	431553	431531	+	3UTR	TIM50	YPL063W	sense	431529	431559	30	10.4018	3.80552	22	7	2.7234
chrXVI	431584	431590	+	intergenic_region	INT_0_8714	INT_0_8714	sense	431566	431621	55	48.2032	21.3109	28	11	6.22222
chrXVI	454170	454170	+	CUTs	XUT_16F-182	573121	sense	454151	454194	43	5.32773	2.02961	8	4	2.35356
chrXVI	459914	459907	+	5UTR	INT_0_8739	INT_0_8739	sense	459895	459922	27	10.148	4.31292	17	5	9.64065
chrXVI	462266	462268	+	intergenic_region	INT_0_8741	INT_0_8741	sense	462266	462279	13	13.1925	8.37214	1	3	4.91038
chrXVI	465936	465886	+	5UTR	SGF11	YPL047W	sense	465804	465946	142	28.1608	5.83513	106	27	6.0759
chrXVI	472192	472192	+	3UTR	NOP4	YPL043W	sense	472192	472207	15	4.05922	2.53701	14	4	3.04441
chrXVI	472331	472325	+	3UTR	CUT421	ST3479	sense	472317	472361	44	24.8627	7.35734	16	12	24.1016
chrXVI	482362	482362	+	XUTs	XUT_16F-193	573124	sense	482362	482363	1	5.07402	5.07402	-1	1	5.07402
chrXVI	486241	486241	+	3UTR	PMA2	YPL036W	sense	486225	486246	21	4.05922	2.53701	10	4	3.80552
chrXVI	497793	497793	+	3UTR	SUV3	YPL029W	sense	497790	497796	6	5.58143	4.05922	0	2	4.44823
chrXVI	503429	503429	+	5UTR	RMI1	YPL024W	sense	503425	503440	15	11.1629	2.02961	10	11	3.25296
chrXVI	510603	510608	+	intergenic_region	INT_0_8784	INT_0_8784	sense	510603	510648	45	24.1016	10.9092	23	11	12.4444
chrXVI	517702	517702	+	CDS	CTF19	YPL018W	sense	517632	518024	392	54.5458	2.02961	197	88	12.5915
chrXVI	528947	528947	+	3UTR	YPL014W	YPL014W	sense	528887	528967	80	188.246	125.328	1	3	6.32899
chrXVI	535792	535790	+	3UTR	RET3	YPL010W	sense	535790	535792	2	11.6703	4.82032	1	3	2.19967
chrXVI	535795	535794	+	3UTR	RET3	YPL010W	sense	535794	535797	3	49.218	43.3829	-1	1	2.09637
chrXVI	535808	535808	+	3UTR	INT_0_8801	INT_0_8801	sense	535807	535821	14	10.148	2.02961	5	6	5.90071
chrXVI	550427	550454	+	3UTR	INT_0_8804	INT_0_8804	antisense	550399	550489	90	30.6979	7.86474	39	12	3.37768
chrXVI	569212	569218	+	intergenic_region	INT_0_8825	INT_0_8825	sense	569208	569260	52	16.2369	4.05922	22	12	15.9832
chrXVI	581993	581993	+	tRNA_100_nt_upstream	XUT_16F-233	573133	sense	581976	582002	26	13.4462	3.55182	12	11	13.1925
chrXVI	584604	584594	+	3UTR	YPR012W	YPR012W	sense	584454	584747	293	28.1608	3.29812	216	41	16.643
chrXVI	599856	599856	+	5UTR	ATP20	YPR020W	sense	599856	599880	24	6.08883	3.29812	16	3	5.83513
chrXVI	613387	613382	+	antisense_CDS	INT_0_8855	INT_0_8855	sense	613363	613397	34	27.6534	8.11844	21	15	12.7092
chrXVI	615274	615274	+	intergenic_region	INT_0_8855	INT_0_8855	sense	615274	615275	1	2.02961	2.02961	-1	1	2.02961
chrXVI	624552	624543	+	antisense_CDS	INT_0_8865	INT_0_8865	sense	624475	624600	125	60.6346	31.7127	81	24	36.0095
chrXVI	627064	627064	+	intergenic_region	INT_0_8865	INT_0_8865	sense	627035	627082	47	8.62584	5.07402	25	6	8.37214
chrXVI	642128	642137	+	5UTR	GLN1	YPR035W	sense	642089	642331	242	33.996	4.31292	120	38	9.3201
chrXVI	650165	650165	+	intergenic_region	INT_0_8882	INT_0_8882	sense	650165	650182	17	14.7147	8.62584	3	4	9.88495
chrXVI	655116	655116	+	CUTs	CUT427	ST3535	sense	655107	655159	52	31.459	11.924	12	12	14.4744
chrXVI	657415	657404	+	3UTR	MCM16	YPR046W	sense	657398	657415	17	17.5054	6.84993	16	6	2.02192
chrXVI	673559	673559	+	3UTR	BRR1	YPR057W	sense	673559	673574	15	8.11844	6.34253	0	2	4.69031
chrXVI	676164	676091	+	CUTs	CUT428	ST3544	sense	675949	676278	329	33.4886	2.53701	212	59	32.9812
chrXVI	677694	677691	+	3UTR	FCY1	YPR062W	sense	677691	677694	3	7.35734	5.07402	2	3	2.28331
chrXVI	681185	681185	+	3UTR	ROX1	YPR065W	sense	681185	681220	35	5.32773	2.28331	34	6	2.82427
chrXVI	687942	687931	+	3UTR	MED1	YPR070W	sense	687931	687942	11	28.4145	15.4758	10	9	2.84285
chrXVI	689418	689418	+	intergenic_region	INT_0_8919	INT_0_8919	sense	689407	689501	94	8.87954	2.02961	47	11	4.50118
chrXVI	689649	689690	+	tRNA_100_nt_downstream	INT_0_8920	INT_0_8920	sense	689598	689831	233	185.963	26.3849	149	95	110.752
chrXVI	692178	692180	+	antisense_CDS	CUT429	ST3552	sense	692145	692190	45	15.9832	7.61104	8	7	15.4758
chrXVI	709539	709539	+	3UTR	YPR084W	YPR084W	sense	709535	709557	22	11.1629	3.80552	5	6	4.55414
chrXVI	709956	709956	+	intergenic_region	INT_0_8940	INT_0_8940	sense	709936	709964	28	4.05922	2.28331	18	4	3.80552
chrXVI	728964	728964	+	XUTs	INT_0_8955	INT_0_8955	sense	728938	728990	52	6.34253	2.53701	9	6	6.08883
chrXVI	730326	730349	+	3UTR	INT_0_8959	INT_0_8959	sense	730312	730366	54	42.3681	16.4906	23	15	3.25576
chrXVI	733405	733433	+	3UTR	PRE2	YPR103W	sense	733388	733556	168	115.941	39.5774	42	24	3.65872
chrXVI	733623	733623	+	antisense_CDS	INT_0_8962	INT_0_8962	sense	733587	733654	67	9.38695	2.02961	35	11	8.87954
chrXVI	742222	742222	+	intergenic_region	INT_0_8965	INT_0_8965	sense	742217	742256	39	5.83513	2.28331	29	7	5.58143
chrXVI	743981	743983	+	3UTR	INT_0_8967	INT_0_8967	sense	743929	744093	164	178.859	59.6198	54	32	3.00648
chrXVI	744361	744362	+	tRNA_100_nt_downstream	YPR108W-A	YPR108W-A	sense	744353	744504	151	95.138	9.13324	83	59	3.35681
chrXVI	745687	745687	+	3UTR	INT_0_8969	INT_0_8969	sense	745685	745697	12	4.82032	2.53701	10	5	3.38913
chrXVI	745791	745791	+	intergenic_region	INT_0_8969	INT_0_8969	sense	745771	745824	53	18.5202	9.38695	23	12	7.62553
chrXVI	758401	758400	+	3UTR	RGC1	YPR115W	sense	758400	758401	1	4.82032	2.53701	0	2	2.28331
chrXVI	758450	758450	+	intergenic_region	INT_0_8976	INT_0_8976	sense	758415	758457	42	5.83513	3.04441	5	3	5.58143
chrXVI	789151	789151	+	CDS	YLH47	YPR125W	sense	789151	789152	1	2.53701	2.53701	-1	1	2.53701
chrXVI	789639	789639	+	intergenic_region	INT_0_8999	INT_0_8999	sense	789560	789663	103	10.9092	2.02961	74	15	10.6555
chrXVI	795963	795969	+	intergenic_region	INT_0_9007	INT_0_9007	sense	795959	796024	65	124.567	51.7551	14	13	8.99307
chrXVI	804260	804260	+	3UTR	INT_0_9016	INT_0_9016	sense	804240	804264	24	3.80552	2.02961	22	4	3.04441
chrXVI	810607	810608	+	tRNA_100_nt_upstream	INT_0_9016	INT_0_9016	sense	810565	810677	112	34.2497	14.461	48	20	33.996
chrXVI	812808	812808	+	SUTs	XUT_16F-324	573144	sense	812808	812831	23	6.34253	3.80552	22	4	4.56662
chrXVI	812879	812871	+	SUTs	XUT_16F-324	573144	sense	812856	812884	28	8.87954	4.05922	22	5	3.60095
chrXVI	813169	813164	+	antisense_CDS	XUT_16F-324	573144	sense	813115	813169	54	14.2073	8.37214	4	3	4.87187
chrXVI	819373	819361	+	intergenic_region	INT_0_9026	INT_0_9026	sense	819350	819407	57	19.0276	4.31292	46	15	13.0623
chrXVI	822146	822135	+	snoRNA_1000_nt_downstream	CUT433	ST3594	sense	821805	822550	745	830.872	45.4125	248	218	72.2396
chrXVI	822599	822607	+	snoRNA_1000_nt_downstream	ASN1	YPR145W	sense	822574	822850	276	62.4105	3.29812	143	76	62.1568
chrXVI	831060	831023	+	CDS	YPR150W	YPR150W	sense	830829	831168	339	203.976	38.0552	226	82	3.51429
chrXVI	835533	835530	+	3UTR	PIN3	YPR154W	sense	835528	835556	28	44.144	19.2813	8	9	2.47601
chrXVI	844158	844158	+	3UTR	CUR1	YPR158W	sense	844156	844198	42	44.144	8.11844	29	21	2.03299
chrXVI	844211	844211	+	intergenic_region	INT_0_9047	INT_0_9047	sense	844202	844216	14	8.37214	4.82032	0	2	6.56643
chrXVI	850400	850400	+	intergenic_region	INT_0_9048	INT_0_9048	sense	850400	850441	41	7.86474	4.31292	19	9	5.29551
chrXVI	860248	860238	+	intergenic_region	INT_0_9051	INT_0_9051	sense	860174	860312	138	33.996	6.84993	55	18	15.6512
chrXVI	876298	876298	+	antisense_CDS	INT_0_9064	INT_0_9064	sense	876232	876320	88	78.6474	28.4145	48	18	2.86143
chrXVI	877277	877276	+	CUTs	CUT434	ST3608	sense	877083	877345	262	28.4145	2.53701	182	61	28.1608
chrXVI	880238	880239	+	3UTR	JIP5	YPR169W	sense	880238	880270	32	22.5794	7.10363	15	12	2.7412
chrXVI	885671	885671	+	3UTR	BSP1	YPR171W	sense	885671	885676	5	4.56662	4.05922	-1	1	4.31292
chrXVI	920934	920934	+	3UTR	QCR2	YPR191W	sense	920934	920985	51	31.9664	20.0424	7	7	5.29551
chrXVI	933219	933224	+	3UTR	YPR196W	YPR196W	sense	933193	933279	86	25.1164	6.84993	33	18	4.94247
chrXVI	933396	933395	+	intergenic_region	INT_0_9109	INT_0_9109	sense	933378	933427	49	9.38695	2.79071	40	11	8.11844
chrXVI	935869	935868	+	3UTR	SGE1	YPR198W	sense	935869	935870	1	2.28331	2.28331	-1	1	2.28331
chrX	23918	23918	+	intergenic_region	INT_0_4467	INT_0_4467	sense	23872	24045	173	16.4906	2.53701	119	27	3.7657
chrX	24218	24216	+	intergenic_region	INT_0_4467	INT_0_4467	sense	24213	24237	24	9.38695	3.29812	12	5	9.13324
chrX	24281	24281	+	intergenic_region	INT_0_4467	INT_0_4467	sense	24272	24347	75	7.35734	2.53701	38	10	7.10363
chrX	33496	33496	+	3UTR	YJL213W	YJL213W	sense	33495	33506	11	19.7887	8.37214	3	4	8.15508
chrX	50629	50629	+	SUTs	XUT_10F-15	572377	sense	50624	50667	43	6.84993	2.28331	32	11	6.59623
chrX	56422	56426	+	intergenic_region	INT_0_4488	INT_0_4488	sense	56345	56439	94	17.7591	4.31292	80	15	4.23641
chrX	67643	67638	+	3UTR	UBP12	YJL197W	sense	67638	67643	5	47.9495	28.4145	2	4	2.2653
chrX	74698	74328	+	3UTR	RPS14B	YJL191W	sense	74198	74707	509	200.931	37.8015	409	192	2.4555
chrX	74844	74853	+	intergenic_region	INT_0_4504	INT_0_4504	sense	74821	75107	286	83.7214	10.6555	131	55	7.91919
chrX	76700	76689	+	3UTR	RPL39	YJL189W	sense	76667	76731	64	30.4441	9.64065	22	12	7.41371
chrX	83260	83260	+	intergenic_region	INT_0_4512	INT_0_4512	sense	83231	83308	77	11.4166	4.05922	33	12	11.1629
chrX	85512	85512	+	antisense_CDS	INT_0_4515	INT_0_4515	sense	85512	85518	6	3.04441	2.53701	-1	1	2.79071
chrX	90789	90789	+	CDS	RPL17B	YJL177W	sense	90658	90851	193	31.9664	3.29812	132	40	14.7097
chrX	91840	91826	+	5UTR	INT_0_4522	INT_0_4522	sense	91826	91840	14	15.2221	7.86474	8	6	2.0476
chrX	96220	96238	+	3UTR	KRE9	YJL174W	sense	96214	96247	33	60.6346	38.3089	16	15	2.25059
chrX	96864	96996	+	XUTs	XUT_10F-42	572383	sense	96857	97162	305	36.0256	3.04441	216	60	6.49275
chrX	102143	102143	+	CDS	YJL169W	YJL169W	sense	102141	102174	33	5.83513	3.55182	12	6	5.58143
chrX	106291	106298	+	intergenic_region	INT_0_4536	INT_0_4536	sense	106272	106348	76	12.9388	3.04441	40	14	12.6851
chrX	106894	106891	+	3UTR	QCR8	YJL166W	sense	106889	106898	9	20.2961	8.62584	4	6	2.17395
chrX	106950	107051	+	3UTR	QCR8	YJL166W	sense	106899	107111	212	33.996	4.56662	142	41	3.20138
chrX	111693	111742	+	SUTs	SUT203	ST1725	sense	111650	111849	199	15.4758	2.02961	123	30	15.2221
chrX	118955	118946	+	CUTs	CUT199	ST1728	sense	118919	118974	55	9.38695	3.29812	18	6	9.13324
chrX	122202	122201	+	intergenic_region	INT_0_4552	INT_0_4552	sense	122114	122218	104	13.4462	2.79071	45	15	10.8028
chrX	126490	126480	+	intergenic_region	XUT_10F-55	572388	sense	126433	126498	65	41.607	20.8035	39	17	5.3948
chrX	129075	129075	+	intergenic_region	INT_0_4557	INT_0_4557	sense	129069	129086	17	8.37214	7.10363	-1	1	6.77825
chrX	137162	137182	+	CDS	YJL150W	YJL150W	sense	137078	137283	205	28.6682	4.05922	131	37	4.39331
chrX	141393	141393	+	3UTR	RPA34	YJL148W	sense	141393	141403	10	6.84993	2.28331	9	6	4.02459
chrX	141592	141592	+	CUTs	CUT202	ST1735	sense	141580	141621	41	6.59623	2.79071	23	4	5.29551
chrX	141696	141687	+	CUTs	CUT202	ST1735	sense	141646	141707	61	19.2813	3.55182	31	12	6.1102
chrX	142696	142696	+	intergenic_region	CUT203	ST1736	sense	142695	142737	42	6.08883	2.28331	19	7	5.83513
chrX	142866	142864	+	XUTs	XUT_10F-68	572393	sense	142849	142891	42	32.7275	12.9388	2	4	32.4738
chrX	144937	144916	+	3UTR	IDS2	YJL146W	sense	144916	144941	25	10.148	2.53701	24	9	2.1182
chrX	146900	146910	+	3UTR	YJL144W	YJL144W	sense	146886	146975	89	123.806	42.3681	10	11	4.12626
chrX	150745	150745	+	intergenic_region	INT_0_4580	INT_0_4580	sense	150680	150752	72	7.35734	2.79071	52	7	7.10363
chrX	193649	193649	+	3UTR	PHO86	YJL117W	sense	193649	193651	2	2.53701	2.02961	1	2	2.02961
chrX	223473	223479	+	3UTR	IME2	YJL106W	sense	223466	223508	42	8.62584	4.56662	19	3	8.37214
chrX	233874	233873	+	tRNA_100_nt_upstream	MEF2	YJL102W	sense	233870	233896	26	40.8459	18.7739	5	6	2.32132
chrX	234010	234010	+	tRNA	tR(ACG)J	tR(ACG)J	sense	233969	234028	59	16.2369	10.4018	7	7	15.9832
chrX	234120	234122	+	intergenic_region	INT_0_4640	INT_0_4640	sense	234073	234148	75	22.3257	3.29812	30	23	22.072
chrX	242063	242064	+	3UTR	SAP185	YJL098W	sense	242063	242108	45	18.0128	5.07402	34	14	4.94247
chrX	291079	291095	+	SUTs	SUT209	ST1778	sense	291053	291183	130	76.8715	26.3849	45	22	26.6541
chrX	295061	295061	+	3UTR	YJL077W-A	YJL077W-A	sense	295061	295062	1	2.53701	2.53701	-1	1	2.53701
chrX	339397	339402	+	3UTR	TDH1	YJL052W	sense	339379	339513	134	316.112	172.263	20	21	5.73296
chrX	354336	354336	+	tRNA_100_nt_downstream	INT_0_4722	INT_0_4722	sense	354282	354356	74	9.13324	2.02961	42	15	8.87954
chrX	354476	354471	+	intergenic_region	INT_0_4722	INT_0_4722	sense	354417	354524	107	36.0256	3.55182	52	32	18.6667
chrX	355310	355310	+	tRNA_100_nt_upstream	INT_0_4722	INT_0_4722	sense	355287	355319	32	6.84993	2.53701	10	6	6.59623
chrX	383626	383677	+	3UTR	KAR2	YJL034W	sense	383605	383756	151	96.1528	23.5942	63	34	2.74206
chrX	407413	407407	+	3UTR	INT_0_4765	INT_0_4765	sense	407381	407421	40	39.5774	16.4906	25	15	5.13002
chrX	409466	409447	+	intergenic_region	INT_0_4767	INT_0_4767	sense	409402	409493	91	127.358	37.0404	62	20	8.99339
chrX	423157	423150	+	antisense_CDS	INT_0_4780	INT_0_4780	sense	423126	423220	94	62.4105	5.83513	49	39	6.77268
chrX	433394	433394	+	antisense_CDS	INT_0_4787	INT_0_4787	sense	433369	433401	32	4.56662	2.02961	23	5	4.31292
chrX	436123	436160	+	3UTR	PRE3	YJL001W	sense	436058	436202	144	65.9623	17.5054	52	24	2.93815
chrX	436279	436297	+	intergenic_region	INT_0_4791	INT_0_4791	sense	436237	436368	131	92.8547	21.0572	45	36	92.601
chrX	438821	438821	+	intergenic_region	INT_0_4792	INT_0_4792	sense	438821	438846	25	3.29812	2.28331	7	3	3.04441
chrX	440696	440656	+	3UTR	MPP10	YJR002W	sense	440624	440696	72	10.148	3.55182	39	13	6.59623
chrX	441392	441392	+	antisense_CDS	INT_0_4793	INT_0_4793	sense	441352	441407	55	4.31292	2.02961	32	4	4.05922
chrX	441530	441530	+	antisense_CDS	INT_0_4793	INT_0_4793	sense	441530	441569	39	4.56662	2.02961	32	5	3.80552
chrX	445011	445011	+	intergenic_region	INT_0_4793	INT_0_4793	sense	445007	445025	18	3.29812	2.79071	-1	1	3.04441
chrX	445401	445400	+	intergenic_region	INT_0_4793	INT_0_4793	sense	445390	445450	60	15.2221	8.37214	21	5	5.03073
chrX	452152	452152	+	intergenic_region	INT_0_4800	INT_0_4800	sense	452150	452181	31	15.4758	9.64065	6	4	5.29551
chrX	467209	467188	+	3UTR	YJR018W	YJR018W	sense	466814	467507	693	173.532	11.1629	448	233	72.3366
chrX	485586	485604	+	antisense_CDS	INT_0_4828	INT_0_4828	sense	485563	485664	101	17.7591	3.04441	52	11	4.56738
chrX	485751	485751	+	antisense_CDS	INT_0_4828	INT_0_4828	sense	485751	485759	8	2.28331	2.02961	-1	1	2.02961
chrX	486705	486705	+	CUTs	CUT215	ST1837	sense	486695	486729	34	13.9536	6.34253	15	11	13.6999
chrX	494651	494655	+	antisense_CDS	INT_0_4832	INT_0_4832	sense	494651	494672	21	10.6555	4.05922	13	8	10.4018
chrX	497260	497260	+	intergenic_region	INT_0_4834	INT_0_4834	sense	497224	497261	37	3.55182	2.02961	27	4	3.55182
chrX	526372	526347	+	CDS	CYC1	YJR048W	sense	526260	526577	317	74.3345	6.08883	118	72	34.362
chrX	531762	531757	+	tRNA_100_nt_upstream	INT_0_4859	INT_0_4859	sense	531691	531773	82	25.1164	5.32773	31	16	9.43563
chrX	537893	537893	+	intergenic_region	INT_0_4864	INT_0_4864	sense	537893	537978	85	6.84993	2.79071	62	10	3.93381
chrX	557753	557754	+	intergenic_region	INT_0_4880	INT_0_4880	sense	557733	557764	31	37.0404	16.2369	8	9	6.14279
chrX	569585	569561	+	intergenic_region	INT_0_4886	INT_0_4886	sense	569559	569609	50	17.5054	4.56662	29	11	5.14421
chrX	575443	575443	+	antisense_CDS	INT_0_4892	INT_0_4892	sense	575426	575445	19	3.55182	2.28331	15	4	3.29812
chrX	585911	585911	+	CUTs	CUT217	ST1866	sense	585893	585954	61	15.4758	6.34253	3	5	12.7092
chrX	587477	587476	+	intergenic_region	INT_0_4903	INT_0_4903	sense	587473	587536	63	45.4125	30.1904	12	11	8.97715
chrX	609551	609551	+	intergenic_region	SUT216	ST1871	sense	609511	609585	74	66.216	39.8311	5	7	25.0333
chrX	613559	613559	+	CUTs	CUT219	ST1875	sense	613527	613714	187	25.8775	3.29812	131	36	25.6238
chrX	620824	620836	+	CDS	URA8	YJR103W	sense	620704	621372	668	121.523	4.05922	367	173	121.269
chrX	628478	628478	+	3UTR	YJR107W	YJR107W	sense	628436	628483	47	11.924	2.02961	38	11	2.70659
chrX	633014	633017	+	intergenic_region	INT_0_4937	INT_0_4937	sense	633006	633029	23	11.1629	3.29812	14	7	10.9092
chrX	640803	640803	+	3UTR	YJR116W	YJR116W	sense	640803	640832	29	4.05922	2.02961	27	6	3.29812
chrX	643512	643526	+	3UTR	STE24	YJR117W	sense	643498	643561	63	54.7995	11.924	28	17	2.39691
chrX	649508	649507	+	5UTR	INT_0_4955	INT_0_4955	sense	649461	649581	120	67.4845	31.459	23	15	5.10294
chrX	652776	652954	+	intergenic_region	INT_0_4960	INT_0_4960	sense	652724	652971	247	166.428	33.4886	62	38	2.25965
chrX	664026	664566	+	snoRNA_1000_nt_downstream	INT_0_4967	INT_0_4967	sense	663888	665298	1410	1170.32	43.3829	862	685	99.6636
chrX	666624	666624	+	antisense_CDS	INT_0_4970	INT_0_4970	sense	666554	666696	142	18.2665	3.04441	81	22	18.0128
chrX	677544	677541	+	antisense_CDS	INT_0_4976	INT_0_4976	sense	677441	677690	249	62.1568	16.998	137	56	5.74268
chrX	698351	698340	+	3UTR	YJR142W	YJR142W	sense	698334	698369	35	17.2517	6.08883	16	9	5.06856
chrX	701913	701915	+	intergenic_region	INT_0_4986	INT_0_4986	sense	701911	701927	16	7.61104	3.04441	4	3	7.35734
chrX	701956	701956	+	intergenic_region	INT_0_4986	INT_0_4986	sense	701951	701973	22	7.35734	5.07402	4	2	6.59623
chrX	708780	708780	+	intergenic_region	INT_0_4991	INT_0_4991	sense	708780	708781	1	3.80552	3.80552	-1	1	3.80552
chrVII	16541	16541	+	SUTs	SUT108	ST1039	sense	16507	16542	35	9.13324	4.82032	26	4	3.08905
chrVII	22241	22241	+	intergenic_region	INT_0_3204	INT_0_3204	sense	22235	22249	14	3.29812	2.02961	7	3	2.79071
chrVII	37135	37133	+	3UTR	PDE1	YGL248W	sense	37127	37247	120	12.1777	2.53701	71	14	8.2963
chrVII	37676	37676	+	3UTR	BRR6	YGL247W	sense	37633	37705	72	19.535	9.64065	36	11	3.49964
chrVII	62056	62056	+	5UTR	TAN1	YGL232W	sense	62028	62155	127	13.9536	5.58143	65	10	13.6999
chrVII	73755	73755	+	3UTR	MTC3	YGL226W	sense	73750	73773	23	11.924	2.79071	17	15	3.35382
chrVII	73829	73829	+	intergenic_region	INT_0_3243	INT_0_3243	sense	73829	73838	9	3.80552	2.53701	6	4	3.29812
chrVII	82956	82952	+	antisense_CDS	INT_0_3253	INT_0_3253	sense	82929	82978	49	17.2517	11.6703	9	3	3.94221
chrVII	97231	97231	+	CUTs	CUT127	ST1072	sense	97220	97236	16	6.08883	2.02961	9	6	5.83513
chrVII	102412	102411	+	intergenic_region	INT_0_3270	INT_0_3270	sense	102403	102438	35	33.7423	15.9832	13	10	6.35461
chrVII	115416	115418	+	tRNA_100_nt_upstream	INT_0_3273	INT_0_3273	sense	115223	115427	204	35.7719	6.34253	170	44	6.17809
chrVII	131326	131327	+	3UTR	DSD1	YGL196W	sense	131279	131382	103	116.195	41.0996	28	20	3.16346
chrVII	145592	145592	+	intergenic_region	INT_0_3293	INT_0_3293	sense	145583	145624	41	6.34253	2.28331	20	6	6.08883
chrVII	145679	145679	+	intergenic_region	INT_0_3293	INT_0_3293	sense	145665	145689	24	4.05922	2.02961	8	4	3.80552
chrVII	163253	163252	+	intergenic_region	INT_0_3310	INT_0_3310	sense	163194	163293	99	15.2221	3.80552	54	13	8.92671
chrVII	166670	166670	+	intergenic_region	XUT_7F-76	572078	sense	166666	166707	41	17.5054	7.10363	5	5	6.00158
chrVII	166955	166955	+	5UTR	YGL177W	YGL177W	sense	166896	167184	288	28.9219	2.28331	174	49	28.6682
chrVII	171388	171388	+	intergenic_region	INT_0_3316	INT_0_3316	sense	171349	171410	61	4.05922	2.02961	27	5	3.55182
chrVII	184239	184239	+	3UTR	ROK1	YGL171W	sense	184220	184241	21	7.35734	2.79071	14	6	2.96548
chrVII	184503	184501	+	CUTs	CUT131	ST1092	sense	184461	184503	42	8.37214	3.55182	4	3	4.82032
chrVII	184895	184895	+	CUTs	CUT131	ST1092	sense	184868	184906	38	8.37214	5.32773	13	5	8.11844
chrVII	185084	185084	+	antisense_CDS	CUT131	ST1092	sense	185084	185101	17	11.924	9.64065	-1	1	9.74374
chrVII	187543	187543	+	3UTR	SUA5	YGL169W	sense	187543	187568	25	10.148	2.53701	17	11	3.17731
chrVII	191995	192003	+	3UTR	CUP2	YGL166W	sense	191995	192036	41	27.146	12.1777	19	13	6.88416
chrVII	204961	204961	+	XUTs	XUT_7F-91	572079	sense	204953	204966	13	3.55182	2.53701	3	2	3.29812
chrVII	205318	205318	+	intergenic_region	INT_0_3337	INT_0_3337	sense	205318	205333	15	11.924	5.83513	6	3	5.06015
chrVII	205601	205601	+	tRNA	tL(CAA)G1	tL(CAA)G1	sense	205563	205645	82	26.1312	2.28331	51	28	25.8775
chrVII	215624	215626	+	3UTR	CDC43	YGL155W	sense	215607	215630	23	51.7551	36.7867	11	8	2.12869
chrVII	227741	227679	+	intergenic_region	INT_0_3353	INT_0_3353	sense	227677	227744	67	31.459	6.34253	60	18	2.74916
chrVII	253274	253288	+	antisense_CDS	INT_0_3366	INT_0_3366	sense	253274	253320	46	25.1164	7.10363	14	7	6.10541
chrVII	257010	257010	+	3UTR	PCL10	YGL134W	sense	257010	257014	4	3.80552	3.04441	-1	1	3.04441
chrVII	267861	267831	+	antisense_CDS	INT_0_3375	INT_0_3375	sense	267752	267877	125	32.7275	10.9092	78	15	6.61939
chrVII	270378	270376	+	XUTs	XUT_7F-126	572083	sense	270372	270435	63	15.2221	5.07402	36	12	4.46336
chrVII	281246	281242	+	CUTs	XUT_7F-133	572085	sense	281000	281411	411	53.531	3.80552	277	84	31.7731
chrVII	284265	284267	+	intergenic_region	INT_0_3390	INT_0_3390	sense	284244	284282	38	30.9516	6.59623	9	10	30.6979
chrVII	286230	286230	+	CUTs	CUT136	ST1123	sense	286189	286231	42	7.10363	2.02961	34	9	7.10363
chrVII	286997	287003	+	CUTs	CUT136	ST1123	sense	286997	287067	70	11.4166	3.29812	36	13	4.34232
chrVII	289598	289598	+	intergenic_region	INT_0_3397	INT_0_3397	sense	289527	289673	146	6.84993	2.02961	107	12	6.59623
chrVII	301551	301551	+	3UTR	NSA1	YGL111W	sense	301550	301552	2	4.31292	2.28331	0	2	2.53701
chrVII	314423	314423	+	intergenic_region	INT_0_3417	INT_0_3417	sense	314423	314460	37	18.2665	4.31292	13	11	2.21165
chrVII	317079	317222	+	snoRNA_1000_nt_downstream	USE1	YGL098W	sense	317076	317861	785	385.88	31.9664	277	180	40.2459
chrVII	318132	318077	+	3UTR	INT_0_3419	INT_0_3419	sense	317915	318156	241	31.7127	4.31292	149	36	21.8881
chrVII	318616	318549	+	3UTR	INT_0_3419	INT_0_3419	sense	318485	318639	154	37.8015	9.38695	109	23	3.26556
chrVII	318922	318860	+	3UTR	INT_0_3419	INT_0_3419	sense	318832	319002	170	20.2961	7.61104	100	20	3.63778
chrVII	319047	319108	+	3UTR	INT_0_3419	INT_0_3419	sense	319030	319177	147	70.5289	16.4906	99	30	5.4328
chrVII	319713	319713	+	tRNA_100_nt_upstream	INT_0_3419	INT_0_3419	sense	319663	319729	66	18.0128	3.29812	43	17	7.41371
chrVII	319920	319917	+	tRNA_100_nt_downstream	INT_0_3420	INT_0_3420	sense	319826	319942	116	148.415	20.5498	8	10	148.162
chrVII	320254	320254	+	SUTs	SUT114	ST1139	sense	320254	320395	141	13.4462	2.02961	122	27	7.86761
chrVII	320526	320526	+	SUTs	SUT114	ST1139	sense	320526	320799	273	30.4441	12.4314	124	31	6.30166
chrVII	328180	328180	+	intergenic_region	INT_0_3426	INT_0_3426	sense	328162	328215	53	12.1777	3.55182	26	14	3.31852
chrVII	346254	346475	+	snoRNA_1000_nt_downstream	INT_0_3438	INT_0_3438	sense	346231	347360	1129	2043.56	109.345	435	369	85.3001
chrVII	374247	374259	+	3UTR	AFT1	YGL071W	sense	374247	374277	30	8.11844	2.28331	25	8	3.28322
chrVII	388892	388892	+	3UTR	SUT117	ST1168	sense	388884	388898	14	4.31292	2.53701	5	2	3.04441
chrVII	400441	400452	+	3UTR	OLE1	YGL055W	sense	400384	400468	84	322.201	120.001	55	29	2.26263
chrVII	403625	403625	+	CDS	YGL052W	YGL052W	sense	403621	403640	19	4.56662	2.53701	13	5	4.31292
chrVII	416097	416097	+	3UTR	RIM8	YGL045W	sense	416097	416107	10	3.55182	2.79071	0	2	3.29812
chrVII	418711	418754	+	3UTR	DST1	YGL043W	sense	418699	418798	99	13.1925	5.83513	42	6	3.17731
chrVII	418847	418847	+	5UTR	INT_0_3501	INT_0_3501	sense	418831	418859	28	10.9092	4.31292	15	8	9.64065
chrVII	419468	419468	+	3UTR	INT_0_3504	INT_0_3504	sense	419462	419500	38	8.62584	4.05922	25	8	4.36879
chrVII	421467	421467	+	intergenic_region	INT_0_3506	INT_0_3506	sense	421219	421607	388	45.9199	2.02961	269	81	45.6662
chrVII	439871	439874	+	5UTR	INT_0_3524	INT_0_3524	sense	439787	439950	163	34.2497	11.4166	69	29	6.45089
chrVII	446398	446398	+	intergenic_region	INT_0_3525	INT_0_3525	sense	446398	446409	11	9.89435	5.58143	3	4	9.64065
chrVII	476277	476277	+	3UTR	YGL010W	YGL010W	sense	476221	476306	85	23.0868	6.34253	23	14	5.60701
chrVII	484807	484863	+	CUTs	CUT144	ST1195	sense	484571	485202	631	111.882	7.86474	424	160	24.5266
chrVII	485293	485275	+	intergenic_region	INT_0_3553	INT_0_3553	sense	485228	485340	112	17.5054	3.04441	63	20	17.2517
chrVII	489557	489512	+	3UTR	COG7	YGL005C	antisense	489479	489579	100	93.6158	30.4441	67	23	2.16527
chrVII	489677	489679	+	intergenic_region	INT_0_3555	INT_0_3555	sense	489677	489711	34	7.86474	3.04441	20	5	7.61104
chrVII	492317	492317	+	intergenic_region	INT_0_3555	INT_0_3555	sense	492302	492372	70	11.6703	3.55182	48	11	4.76596
chrVII	495397	495397	+	3UTR	ERP6	YGL002W	sense	495397	495402	5	5.58143	3.04441	4	2	3.04441
chrVII	504657	504657	+	3UTR	PEX31	YGR004W	sense	504639	504677	38	6.08883	2.02961	31	7	5.83513
chrVII	508544	508544	+	intergenic_region	INT_0_3568	INT_0_3568	sense	508531	508563	32	6.34253	2.53701	14	9	6.08883
chrVII	509009	509009	+	CUTs	CUT145	ST1202	sense	508925	509101	176	16.4906	2.79071	113	26	16.2369
chrVII	516672	516672	+	3UTR	SNU71	YGR013W	sense	516667	516732	65	19.535	3.04441	40	14	2.3674
chrVII	525152	525152	+	5UTR	YGR018C	YGR018C	antisense	525125	525178	53	36.2793	17.7591	28	11	3.47991
chrVII	531152	531154	+	3UTR	MTL1	YGR023W	sense	531142	531204	62	16.2369	6.84993	33	9	3.33617
chrVII	534116	534114	+	intergenic_region	INT_0_3593	INT_0_3593	sense	534113	534117	4	6.84993	3.80552	1	3	2.64775
chrVII	545232	545240	+	snoRNA_300_nt_upstream	CUT146	ST1216	sense	545206	545287	81	42.6218	6.84993	39	30	35.374
chrVII	545588	545588	+	snoRNA_1000_nt_downstream	INT_0_3603	INT_0_3603	sense	545524	545631	107	57.0828	14.2073	16	13	56.8291
chrVII	545892	545984	+	snoRNA_1000_nt_downstream	CUT147	ST1218	sense	545658	546325	667	266.386	9.13324	393	234	31.7125
chrVII	554055	554055	+	intergenic_region	INT_0_3608	INT_0_3608	sense	554047	554077	30	9.89435	6.08883	7	4	3.09584
chrVII	555326	555323	+	intergenic_region	INT_0_3608	INT_0_3608	sense	555274	555336	62	37.0404	4.31292	29	21	36.7867
chrVII	556016	556016	+	intron	YGR034W_intron	intergenic	sense	556014	556024	10	7.61104	3.55182	2	4	7.35734
chrVII	556911	556921	+	5UTR	INT_0_3610	INT_0_3610	sense	556862	556946	84	85.751	28.6682	20	16	10.4976
chrVII	559677	559677	+	intergenic_region	INT_0_3614	INT_0_3614	sense	559647	559783	136	13.6999	3.55182	65	16	13.4462
chrVII	567913	567871	+	intergenic_region	INT_0_3617	INT_0_3617	sense	567829	568426	597	104.271	9.89435	373	123	3.80905
chrVII	580448	580428	+	3UTR	YGR042W	YGR042W	sense	580428	580454	26	18.5202	10.9092	19	6	3.31545
chrVII	582905	582905	+	intergenic_region	INT_0_3628	INT_0_3628	sense	582879	582912	33	10.6555	5.58143	3	4	10.148
chrVII	584668	584668	+	intergenic_region	INT_0_3628	INT_0_3628	sense	584646	584689	43	7.10363	2.28331	15	9	6.84993
chrVII	586392	586487	+	3UTR	TAM41	YGR046W	sense	586384	586504	120	58.3513	24.8627	34	15	2.10899
chrVII	592201	592184	+	antisense_CDS	INT_0_3633	INT_0_3633	sense	592145	592244	99	25.1164	5.83513	57	23	3.54251
chrVII	599319	599319	+	intergenic_region	INT_0_3639	INT_0_3639	sense	599317	599340	23	9.38695	4.82032	18	5	7.62553
chrVII	606129	606115	+	5UTR	CUT149	ST1236	sense	605935	606215	280	52.5162	3.04441	184	72	13.6359
chrVII	609461	609470	+	snoRNA_300_nt_upstream	INT_0_3647	INT_0_3647	sense	609441	609521	80	293.532	44.144	24	23	293.279
chrVII	609892	609868	+	snoRNA_1000_nt_downstream	CUT150	ST1240	sense	609696	610207	511	904.699	99.1972	221	151	188.732
chrVII	631434	631434	+	intergenic_region	INT_0_3667	INT_0_3667	sense	631434	631444	10	9.64065	8.62584	-1	1	6.53113
chrVII	641998	641998	+	5UTR	INT_0_3676	INT_0_3676	sense	641950	642025	75	11.1629	4.56662	39	12	6.50591
chrVII	675783	675783	+	antisense_CDS	INT_0_3701	INT_0_3701	sense	675747	675802	55	4.82032	2.02961	32	5	4.56662
chrVII	682420	682418	+	intergenic_region	INT_0_3707	INT_0_3707	sense	682393	682460	67	147.4	40.3385	23	18	5.25025
chrVII	694577	694545	+	intergenic_region	INT_0_3712	INT_0_3712	sense	694519	694635	116	29.683	7.86474	77	19	3.47991
chrVII	697445	697468	+	3UTR	NOP7	YGR103W	sense	697399	697469	70	59.1124	18.0128	47	20	2.46771
chrVII	697564	697564	+	antisense_CDS	INT_0_3714	INT_0_3714	sense	697554	697565	11	5.07402	2.02961	7	4	5.07402
chrVII	700607	700603	+	tRNA_100_nt_upstream	CUT153	ST1268	sense	700567	700623	56	51.7551	13.6999	16	17	51.5014
chrVII	700751	700754	+	tRNA	tL(GAG)G	tL(GAG)G	sense	700668	700872	204	39.8311	3.04441	109	51	20.6525
chrVII	728053	728042	+	antisense_CDS	INT_0_3739	INT_0_3739	sense	728013	728132	119	494.717	130.656	42	38	8.70966
chrVII	733844	733774	+	5UTR	INT_0_3747	INT_0_3747	sense	733685	734053	368	81.1844	2.79071	200	121	42.2317
chrVII	735923	735924	+	intergenic_region	INT_0_3748	INT_0_3748	sense	735914	735934	20	16.998	4.05922	8	8	16.7443
chrVII	741893	741898	+	3UTR	INT_0_3756	INT_0_3756	sense	741877	741978	101	95.8991	24.8627	67	30	2.57601
chrVII	763677	763675	+	intergenic_region	INT_0_3776	INT_0_3776	sense	763675	763705	30	14.7147	3.55182	12	8	5.48807
chrVII	763741	763740	+	intergenic_region	INT_0_3776	INT_0_3776	sense	763732	763769	37	42.8755	22.8331	5	5	9.36469
chrVII	767194	767222	+	intergenic_region	INT_0_3779	INT_0_3779	sense	767067	767391	324	88.288	5.83513	189	98	73.5017
chrVII	773785	773786	+	3UTR	BTN2	YGR142W	sense	773768	773811	43	147.4	87.0195	4	6	5.85028
chrVII	777913	777910	+	intergenic_region	INT_0_3787	INT_0_3787	sense	777909	777913	4	10.148	7.10363	2	3	3.04441
chrVII	784009	784009	+	intergenic_region	INT_0_3792	INT_0_3792	sense	784009	784066	57	4.82032	2.02961	33	7	3.60095
chrVII	790518	790518	+	3UTR	YGR149W	YGR149W	sense	790480	790578	98	79.1548	20.2961	61	29	2.63505
chrVII	794349	794350	+	tRNA_100_nt_upstream	INT_0_3801	INT_0_3801	sense	794333	794368	35	13.4462	2.02961	13	9	13.1925
chrVII	794494	794493	+	tRNA_100_nt_downstream	INT_0_3802	INT_0_3802	sense	794433	794511	78	23.3405	5.07402	21	17	23.0868
chrVII	800228	800228	+	3UTR	INT_0_3808	INT_0_3808	sense	800222	800271	49	10.6555	2.79071	33	13	3.34024
chrVII	806174	806174	+	CUTs	CUT158	ST1312	sense	806155	806212	57	12.9388	6.59623	10	6	10.591
chrVII	806358	806358	+	intergenic_region	INT_0_3813	INT_0_3813	sense	806325	806361	36	11.4166	4.05922	26	12	11.1629
chrVII	806416	806416	+	antisense_CDS	INT_0_3813	INT_0_3813	sense	806383	806430	47	7.10363	2.02961	25	7	6.59623
chrVII	807884	807884	+	intergenic_region	INT_0_3816	INT_0_3816	sense	807884	807885	1	2.79071	2.53701	-1	1	2.53701
chrVII	811372	811372	+	XUTs	XUT_7F-368	572114	sense	811366	811421	55	9.13324	2.53701	26	10	6.17809
chrVII	832286	832286	+	3UTR	KRE11	YGR166W	sense	832286	832306	20	4.56662	3.04441	3	2	4.05922
chrVII	833359	833355	+	3UTR	CLC1	YGR167W	sense	833356	833424	68	25.8775	7.61104	54	19	2.18881
chrVII	833698	833698	+	antisense_CDS	INT_0_3832	INT_0_3832	sense	833683	833702	19	5.07402	2.28331	18	4	4.05922
chrVII	834614	834614	+	XUTs	XUT_7F-375	572115	sense	834567	834647	80	29.4293	9.89435	53	21	4.39331
chrVII	842280	842280	+	antisense_CDS	INT_0_3838	INT_0_3838	sense	842268	842308	40	8.37214	2.02961	25	6	7.86474
chrVII	845231	845231	+	3UTR	RBG2	YGR173W	sense	845230	845259	29	43.6366	20.2961	7	5	4.23641
chrVII	845540	845540	+	intergenic_region	INT_0_3840	INT_0_3840	sense	845526	845553	27	6.34253	2.79071	7	4	6.08883
chrVII	853669	853669	+	intergenic_region	INT_0_3848	INT_0_3848	sense	853638	853688	50	10.148	2.02961	23	9	5.59811
chrVII	858834	858834	+	antisense_CDS	INT_0_3854	INT_0_3854	sense	858804	858859	55	12.6851	2.28331	37	11	3.05271
chrVII	870191	870190	+	intergenic_region	INT_0_3861	INT_0_3861	sense	870162	870193	31	10.4018	4.82032	28	9	6.88416
chrVII	884807	884804	+	CUTs	CUT160	ST1331	sense	884649	885006	357	66.9771	11.6703	160	75	66.4697
chrVII	886073	886073	+	antisense_CDS	INT_0_3872	INT_0_3872	sense	886036	886099	63	6.08883	3.80552	19	6	5.83513
chrVII	890922	890922	+	antisense_CDS	INT_0_3877	INT_0_3877	sense	890922	891003	81	12.9388	3.80552	46	16	8.64933
chrVII	897393	897397	+	CUTs	CUT161	ST1334	sense	897364	897460	96	11.6703	2.53701	34	8	5.95745
chrVII	903601	903598	+	antisense_CDS	INT_0_3888	INT_0_3888	sense	903540	903637	97	26.6386	11.924	26	24	9.91704
chrVII	913317	913317	+	intergenic_region	INT_0_3897	INT_0_3897	sense	913316	913321	5	3.55182	2.28331	3	3	2.79071
chrVII	921975	921984	+	intergenic_region	INT_0_3905	INT_0_3905	sense	921975	922021	46	11.4166	3.55182	26	9	3.88337
chrVII	922053	922053	+	intergenic_region	INT_0_3905	INT_0_3905	sense	922051	922083	32	23.5942	13.4462	3	4	10.8264
chrVII	936068	936070	+	CDS	YGR219W	YGR219W	sense	936011	936096	85	44.144	14.7147	62	18	4.68234
chrVII	947228	947228	+	intergenic_region	INT_0_3922	INT_0_3922	sense	947227	947236	9	8.87954	7.86474	-1	1	8.62584
chrVII	959907	959907	+	CDS	YHB1	YGR234W	sense	959897	959949	52	5.32773	2.02961	29	6	5.07402
chrVII	964941	964941	+	antisense_CDS	INT_0_3935	INT_0_3935	sense	964931	964977	46	6.08883	2.53701	32	9	5.83513
chrVII	965739	965739	+	intergenic_region	INT_0_3935	INT_0_3935	sense	965738	965756	18	3.55182	2.53701	16	3	3.04441
chrVII	979770	979770	+	antisense_CDS	INT_0_3945	INT_0_3945	sense	979758	979829	71	11.1629	2.02961	24	10	10.9092
chrVII	986833	986833	+	3UTR	SOL4	YGR248W	sense	986820	986865	45	28.1608	10.148	9	8	4.16076
chrVII	989913	989912	+	3UTR	MGA1	YGR249W	sense	989909	989922	13	23.5942	15.9832	6	6	7.1693
chrVII	989952	989964	+	3UTR	MGA1	YGR249W	sense	989944	989989	45	14.461	3.04441	22	14	11.8619
chrVII	990439	990433	+	3UTR	MGA1	YGR249W	sense	990401	990449	48	22.8331	9.38695	17	10	22.3257
chrVII	995421	995421	+	CUTs	CUT165	ST1366	sense	995389	995469	80	6.34253	2.79071	34	9	6.08883
chrVII	1000823	1000836	+	CUTs	CUT166	ST1369	sense	1000802	1000866	64	15.2221	4.05922	17	11	5.68064
chrVII	1002411	1002507	+	intergenic_region	INT_0_3962	INT_0_3962	sense	1002388	1002563	175	411.757	53.2773	121	57	3.38786
chrVII	1004328	1004318	+	tRNA_100_nt_downstream	INT_0_3964	INT_0_3964	sense	1004246	1004344	98	37.5478	5.83513	64	43	37.2941
chrVII	1025965	1025965	+	intergenic_region	INT_0_3978	INT_0_3978	sense	1025946	1025975	29	4.56662	2.02961	8	5	4.31292
chrVII	1043922	1043902	+	antisense_CDS	INT_0_3987	INT_0_3987	sense	1043888	1043928	40	18.5202	5.58143	22	9	3.17731
chrVII	1055722	1055722	+	CDS	YOR1	YGR281W	sense	1055707	1055742	35	9.13324	3.29812	11	7	8.87954
chrVII	1060558	1060558	+	SUTs	XUT_7F-470	572134	sense	1060558	1060628	70	4.82032	2.28331	53	7	4.56662
chrVII	1072234	1072216	+	3UTR	MAL13	YGR288W	sense	1072181	1072234	53	17.7591	6.34253	43	17	3.66612
chrVII	1073227	1073227	+	intergenic_region	INT_0_4006	INT_0_4006	sense	1073198	1073263	65	8.37214	3.29812	37	8	7.86474
chrVII	1080796	1080796	+	3UTR	PAU12	YGR294W	sense	1080792	1080802	10	3.29812	2.28331	3	3	3.04441
chrVII	1083591	1083591	+	intergenic_region	XUT_7F-480	572139	sense	1083591	1083592	1	2.79071	2.79071	-1	1	2.79071
chrIII	27057	27089	+	3UTR	PRD1	YCL057W	sense	27056	27130	74	17.5054	7.35734	31	14	3.27359
chrIII	39525	39525	+	intergenic_region	INT_0_832	INT_0_832	sense	39263	39546	283	27.146	3.80552	209	52	7.01655
chrIII	41383	41394	+	intergenic_region	INT_0_834	INT_0_834	sense	41382	41409	27	29.4293	18.7739	9	9	4.05989
chrIII	41958	41958	+	intergenic_region	INT_0_835	INT_0_835	sense	41955	41970	15	4.31292	2.02961	9	6	4.05922
chrIII	61256	61256	+	intergenic_region	INT_0_847	INT_0_847	sense	61255	61362	107	11.6703	5.07402	66	13	11.4166
chrIII	64736	64736	+	antisense_CDS	INT_0_851	INT_0_851	sense	64685	64818	133	21.0572	7.10363	81	20	4.13554
chrIII	92604	92595	+	intergenic_region	INT_0_871	INT_0_871	sense	92580	92618	38	48.2032	9.38695	28	16	7.92208
chrIII	120355	120355	+	intergenic_region	INT_0_899	INT_0_899	sense	120349	120366	17	3.29812	2.53701	4	2	3.04441
chrIII	120868	120867	+	CUTs	CUT043	ST0303	sense	120868	120886	18	4.56662	2.53701	10	4	3.80552
chrIII	131658	131658	+	intergenic_region	INT_0_912	INT_0_912	sense	131657	131659	2	2.79071	2.53701	-1	1	2.79071
chrIII	151805	151805	+	antisense_CDS	INT_0_928	INT_0_928	sense	151787	151831	44	22.072	11.6703	12	7	5.23321
chrIII	152561	152572	+	intergenic_region	INT_0_928	INT_0_928	sense	152554	152682	128	19.0276	3.04441	56	19	18.7739
chrIII	164308	164308	+	CUTs	CUT047	ST0315	sense	164232	164349	117	24.1016	10.4018	52	18	23.8479
chrIII	168998	168998	+	XUTs	XUT_3F-78	571711	sense	168998	169015	17	5.83513	4.05922	7	2	3.32861
chrIII	169606	169545	+	intergenic_region	INT_0_950	INT_0_950	sense	169544	169637	93	45.6662	16.2369	17	12	3.05773
chrIII	169805	169802	+	intergenic_region	INT_0_950	INT_0_950	sense	169801	169817	16	14.461	6.59623	4	5	2.44054
chrIII	169862	169863	+	intergenic_region	INT_0_950	INT_0_950	sense	169842	169891	49	65.9623	24.1016	8	8	4.89835
chrIII	170250	170250	+	intergenic_region	INT_0_950	INT_0_950	sense	170249	170251	2	5.32773	4.56662	-1	1	5.07402
chrIII	177091	177091	+	snoRNA_300_nt_upstream	INT_0_954	INT_0_954	sense	177083	177133	50	6.84993	2.28331	16	11	6.59623
chrIII	177473	177429	+	snoRNA_1000_nt_downstream	INT_0_957	INT_0_957	sense	177282	177590	308	185.456	12.1777	187	123	85.9049
chrIII	179284	179285	+	CUTs	CUT048	ST0318	sense	179245	179311	66	24.1016	6.08883	30	13	12.4444
chrIII	201544	201544	+	antisense_CDS	INT_0_970	INT_0_970	sense	201511	201575	64	17.7591	7.10363	9	8	17.5054
chrIII	209974	209974	+	3UTR	YCR045W-A	YCR045W-A	sense	209974	209991	17	4.56662	3.55182	2	2	4.31292
chrIII	218392	218436	+	3UTR	THR4	YCR053W	sense	218368	218479	111	95.8991	23.5942	68	28	3.37476
chrIII	220170	220170	+	intergenic_region	INT_0_990	INT_0_990	sense	220137	220191	54	7.10363	2.02961	48	11	6.59623
chrIII	228024	228040	+	tRNA	SUP61	tS(CGA)C	sense	227985	228198	213	62.1568	3.04441	132	72	61.9031
chrIII	240243	240252	+	antisense_CDS	INT_0_1005	INT_0_1005	sense	240243	240273	30	9.38695	2.53701	20	6	8.87954
chrIII	259421	259459	+	3UTR	AHC2	YCR082W	sense	259382	259588	206	140.043	35.2645	41	30	2.29333
chrIII	267275	267275	+	5UTR	INT_0_1027	INT_0_1027	antisense	267262	267284	22	4.56662	2.79071	16	4	3.80552
chrIII	288342	288342	+	antisense_CDS	INT_0_1034	INT_0_1034	sense	288342	288343	1	4.05922	4.05922	-1	1	4.05922
chrIV	21439	21442	+	3UTR	YDL241W	YDL241W	sense	21397	21451	54	30.6979	9.64065	20	8	3.53034
chrIV	21683	21683	+	intergenic_region	INT_0_1065	INT_0_1065	sense	21681	21700	19	4.56662	3.55182	1	2	4.31292
chrIV	21766	21766	+	XUTs	XUT_4F-14	571738	sense	21729	21803	74	13.6999	2.02961	41	14	4.31788
chrIV	48145	48145	+	intergenic_region	INT_0_1084	INT_0_1084	sense	48145	48146	1	2.02961	2.02961	-1	1	2.02961
chrIV	57556	57556	+	antisense_CDS	INT_0_1091	INT_0_1091	sense	57136	57673	537	63.679	2.28331	410	127	52.9551
chrIV	74434	74434	+	CUTs	XUT_4F-43	571744	sense	74316	74561	245	20.8035	2.79071	189	38	10.591
chrIV	77431	77431	+	antisense_CDS	INT_0_1105	INT_0_1105	sense	77419	77465	46	13.9536	5.32773	38	11	12.1777
chrIV	79208	79208	+	3UTR	SHR3	YDL212W	sense	79208	79209	1	3.04441	2.28331	0	2	2.28331
chrIV	88221	88238	+	5UTR	GLE1	YDL207W	sense	88123	88285	162	42.6218	5.58143	137	41	4.21119
chrIV	92489	92474	+	3UTR	YDL206W	YDL206W	sense	92469	92545	76	51.2477	22.8331	37	15	2.33933
chrIV	95964	95964	+	3UTR	RTN2	YDL204W	sense	95956	95981	25	9.89435	5.32773	14	5	3.70686
chrIV	104753	104753	+	intergenic_region	INT_0_1128	INT_0_1128	sense	104700	104772	72	8.87954	3.55182	45	8	5.14421
chrIV	114258	114258	+	3UTR	INT_0_1130	INT_0_1130	antisense	114258	114270	12	4.05922	2.79071	3	2	2.2695
chrIV	117421	117428	+	intergenic_region	INT_0_1136	INT_0_1136	sense	117414	117489	75	41.607	8.87954	48	22	6.90534
chrIV	130216	130259	+	intergenic_region	INT_0_1144	INT_0_1144	sense	130167	130355	188	44.6514	10.6555	163	34	5.79196
chrIV	135737	135737	+	5UTR	YDL180W	YDL180W	sense	135715	135782	67	7.35734	2.02961	25	9	5.93097
chrIV	139450	139450	+	3UTR	PCL9	YDL179W	sense	139397	139481	84	29.683	5.58143	70	22	3.23305
chrIV	148049	148048	+	intergenic_region	INT_0_1159	INT_0_1159	sense	148005	148062	57	22.5794	3.55182	31	20	22.3257
chrIV	160966	160999	+	3UTR	SFA1	YDL168W	sense	160962	161038	76	59.8735	19.535	10	9	2.27367
chrIV	192465	192465	+	CUTs	CUT052	ST0406	sense	192465	192474	9	16.7443	12.9388	0	2	6.25833
chrIV	192654	192664	+	5UTR	LDB17	YDL146W	sense	192565	192713	148	23.8479	3.29812	86	22	16.4161
chrIV	201683	201682	+	3UTR	CCT4	YDL143W	sense	201682	201686	4	9.13324	3.04441	2	4	2.44408
chrIV	201841	201839	+	3UTR	CCT4	YDL143W	sense	201799	201864	65	105.032	50.2328	7	6	10.1723
chrIV	217313	217315	+	intergenic_region	INT_0_1206	INT_0_1206	sense	217309	217372	63	48.2032	18.7739	7	8	3.45121
chrIV	223804	223804	+	3UTR	YDL133W	YDL133W	sense	223800	223807	7	3.04441	2.02961	5	3	2.79071
chrIV	226939	226956	+	intergenic_region	INT_0_1214	INT_0_1214	sense	226913	226974	61	192.559	37.2941	35	30	2.48545
chrIV	227303	227303	+	5UTR	INT_0_1214	INT_0_1214	sense	227296	227319	23	7.10363	3.04441	14	7	6.34253
chrIV	229019	229019	+	intergenic_region	INT_0_1215	INT_0_1215	sense	229012	229041	29	3.29812	2.28331	18	3	3.04441
chrIV	229616	229616	+	intergenic_region	INT_0_1216	INT_0_1216	sense	229594	229645	51	13.1925	3.04441	37	18	4.05989
chrIV	246617	246694	+	3UTR	YFH1	YDL120W	sense	246601	246717	116	41.3533	6.84993	76	37	2.25756
chrIV	256637	256637	+	antisense_CDS	INT_0_1239	INT_0_1239	sense	256625	256640	15	4.56662	3.29812	4	3	4.31292
chrIV	302814	302812	+	intergenic_region	INT_0_1273	INT_0_1273	sense	302746	302856	110	13.9536	4.05922	34	9	13.6999
chrIV	306870	306870	+	intergenic_region	INT_0_1277	INT_0_1277	sense	306787	306894	107	24.3553	13.6999	68	10	9.14679
chrIV	309765	309531	+	intergenic_region	INT_0_1279	INT_0_1279	sense	309465	309772	307	201.692	33.2349	255	81	2.48482
chrIV	331187	331183	+	CDS	BDF2	YDL070W	sense	331151	331203	52	79.9159	17.2517	13	13	79.6622
chrIV	332348	332355	+	CDS	BDF2	YDL070W	sense	332330	332391	61	69.0067	12.1777	29	22	68.753
chrIV	333120	333120	+	3UTR	BDF2	YDL070W	sense	333120	333121	1	3.80552	2.79071	0	2	2.79071
chrIV	333132	333139	+	3UTR	BDF2	YDL070W	sense	333130	333157	27	20.5498	13.4462	10	5	2.39855
chrIV	333203	333191	+	5UTR	INT_0_1298	INT_0_1298	sense	333189	333237	48	194.081	120.001	8	9	3.12415
chrIV	336313	336313	+	3UTR	IDP1	YDL066W	sense	336299	336356	57	10.9092	6.08883	26	7	4.04384
chrIV	336526	336527	+	antisense_CDS	INT_0_1302	INT_0_1302	sense	336478	336538	60	22.5794	6.84993	37	11	6.14279
chrIV	338327	338327	+	antisense_CDS	INT_0_1304	INT_0_1304	sense	338327	338332	5	2.79071	2.02961	4	2	2.02961
chrIV	359512	359512	+	tRNA_100_nt_upstream	INT_0_1317	INT_0_1317	sense	359488	359521	33	8.87954	2.02961	11	8	8.62584
chrIV	359814	359812	+	intergenic_region	INT_0_1318	INT_0_1318	sense	359812	359821	9	44.144	9.64065	5	7	2.10589
chrIV	389149	389146	+	intergenic_region	INT_0_1343	INT_0_1343	sense	389090	389240	150	27.9071	8.62584	60	24	8.24586
chrIV	397360	397355	+	intergenic_region	INT_0_1349	INT_0_1349	sense	397349	397391	42	31.2053	5.32773	10	10	3.00489
chrIV	399237	399262	+	3UTR	PRP9	YDL030W	sense	399220	399280	60	22.5794	4.31292	39	17	3.68567
chrIV	400924	400921	+	3UTR	ARP2	YDL029W	sense	400919	400924	5	8.62584	5.83513	2	3	2.79071
chrIV	400935	400994	+	3UTR	ARP2	YDL029W	sense	400929	401043	114	116.956	52.7699	45	25	2.98238
chrIV	427028	427027	+	3UTR	CDC7	YDL017W	sense	427020	427065	45	4.05922	2.53701	29	4	3.80552
chrIV	428770	428770	+	intergenic_region	INT_0_1378	INT_0_1378	sense	428671	428809	138	8.37214	2.28331	86	13	8.11844
chrIV	431639	431644	+	intergenic_region	INT_0_1380	INT_0_1380	sense	431563	431658	95	21.0572	4.31292	72	26	20.5498
chrIV	439442	439486	+	3UTR	RPT2	YDL007W	sense	439431	439508	77	578.185	111.375	29	26	2.28686
chrIV	443817	443817	+	intergenic_region	INT_0_1394	INT_0_1394	sense	443817	443836	19	5.32773	2.02961	18	5	3.17731
chrIV	453897	453922	+	CUTs	CUT061	ST0485	sense	453868	453987	119	53.0236	11.924	66	29	7.86761
chrIV	456766	456766	+	3UTR	RAD57	YDR004W	sense	456766	456823	57	3.80552	2.02961	21	4	3.55182
chrIV	462876	462874	+	intergenic_region	INT_0_1408	INT_0_1408	sense	462872	462885	13	9.13324	4.05922	3	3	8.87954
chrIV	470610	470610	+	intergenic_region	INT_0_1412	INT_0_1412	sense	470607	470612	5	4.05922	2.79071	1	3	3.80552
chrIV	473871	473850	+	3UTR	PSF1	YDR013W	sense	473849	473871	22	55.5606	49.4717	-1	1	3.63121
chrIV	484055	484055	+	intergenic_region	INT_0_1425	INT_0_1425	sense	484053	484123	70	5.32773	2.28331	50	7	5.07402
chrIV	491042	491039	+	3UTR	SES1	YDR023W	sense	491039	491042	3	53.531	50.7402	-1	1	2.79071
chrIV	491068	491093	+	CDS	FYV1	YDR024W	sense	491068	491151	83	13.4462	3.29812	62	18	4.23641
chrIV	492515	492518	+	intergenic_region	INT_0_1432	INT_0_1432	sense	492495	492532	37	14.461	7.10363	9	5	2.6959
chrIV	506628	506628	+	SUTs	XUT_4F-253	571775	sense	506617	506924	307	51.2477	2.02961	214	82	50.994
chrIV	507902	507902	+	5UTR	INT_0_1442	INT_0_1442	sense	507870	507905	35	8.11844	5.83513	7	3	6.56643
chrIV	509745	509748	+	antisense_CDS	INT_0_1443	INT_0_1443	sense	509652	509789	137	37.5478	8.37214	66	26	5.02219
chrIV	509885	509887	+	antisense_CDS	INT_0_1443	INT_0_1443	sense	509833	509894	61	15.2221	5.07402	17	11	14.9684
chrIV	519827	519831	+	tRNA_100_nt_downstream	tL(UAA)D	tL(UAA)D	sense	519778	519902	124	41.8607	2.53701	73	42	41.607
chrIV	520906	520904	+	tRNA_100_nt_upstream	INT_0_1447	INT_0_1447	sense	520889	520916	27	21.3109	6.59623	6	6	21.0572
chrIV	521699	521699	+	3UTR	YDR034W-B	YDR034W-B	sense	521679	521714	35	19.0276	4.56662	5	7	3.91868
chrIV	527357	527354	+	intergenic_region	INT_0_1453	INT_0_1453	sense	527349	527370	21	20.2961	9.64065	7	3	3.59174
chrIV	527441	527441	+	antisense_CDS	INT_0_1453	INT_0_1453	sense	527429	527464	35	4.82032	2.02961	20	6	4.56662
chrIV	538569	538569	+	intergenic_region	INT_0_1453	INT_0_1453	sense	538553	538586	33	6.59623	3.04441	24	4	4.66005
chrIV	553165	553167	+	5UTR	INT_0_1469	INT_0_1469	sense	553155	553187	32	7.10363	3.55182	4	3	6.84993
chrIV	565112	565121	+	antisense_CDS	INT_0_1483	INT_0_1483	sense	565069	565169	100	11.1629	3.04441	46	10	10.6555
chrIV	574098	574071	+	5UTR	INT_0_1491	INT_0_1491	sense	574064	574098	34	10.4018	5.07402	28	5	3.17731
chrIV	582553	582553	+	3UTR	RRG1	YDR065W	sense	582553	582619	66	10.4018	5.32773	29	7	8.26099
chrIV	583573	583573	+	intergenic_region	INT_0_1501	INT_0_1501	sense	583573	583579	6	4.05922	2.28331	5	4	2.79071
chrIV	588836	588836	+	antisense_CDS	INT_0_1506	INT_0_1506	sense	588777	588903	126	11.4166	2.02961	77	14	11.1629
chrIV	593229	593229	+	3UTR	SNF11	YDR073W	sense	593229	593398	169	30.4441	14.461	75	23	5.95114
chrIV	596837	596830	+	3UTR	TPS2	YDR074W	sense	596797	596885	88	105.286	19.7887	38	23	2.77511
chrIV	602241	602209	+	antisense_CDS	INT_0_1516	INT_0_1516	sense	602152	602286	134	126.343	20.0424	75	45	4.17757
chrIV	618416	618406	+	XUTs	XUT_4F-306	571787	sense	618399	618420	21	8.87954	2.79071	12	8	2.40063
chrIV	640117	640117	+	antisense_CDS	INT_0_1542	INT_0_1542	sense	640116	640134	18	7.61104	4.82032	8	5	6.59623
chrIV	654770	654770	+	3UTR	BMH2	YDR099W	sense	654768	654816	48	544.95	421.905	1	3	5.45298
chrIV	655780	655784	+	antisense_CDS	INT_0_1550	INT_0_1550	sense	655718	655815	97	14.9684	4.05922	61	15	6.14279
chrIV	668589	668577	+	intergenic_region	INT_0_1556	INT_0_1556	sense	668449	668831	382	135.984	32.4738	275	79	2.11415
chrIV	668928	668928	+	intergenic_region	INT_0_1556	INT_0_1556	sense	668883	668929	46	15.2221	3.80552	40	20	2.76287
chrIV	671089	671092	+	intergenic_region	INT_0_1556	INT_0_1556	sense	671066	671146	80	76.3641	44.144	14	12	5.77692
chrIV	673507	673507	+	intergenic_region	INT_0_1559	INT_0_1559	sense	673504	673540	36	7.86474	2.02961	13	6	5.29551
chrIV	682855	682855	+	antisense_CDS	INT_0_1567	INT_0_1567	sense	682796	682911	115	19.535	3.55182	84	33	19.2813
chrIV	688270	688270	+	CDS	VBA4	YDR119W	sense	688270	688290	20	3.29812	2.79071	-1	1	3.04441
chrIV	698102	698090	+	3UTR	KIN1	YDR122W	sense	698074	698153	79	11.6703	2.79071	46	11	4.76596
chrIV	701880	701863	+	antisense_CDS	INT_0_1580	INT_0_1580	sense	701780	701944	164	14.7147	3.29812	95	15	12.0738
chrIV	704589	704590	+	3UTR	SWF1	YDR126W	sense	704498	704628	130	25.6238	6.34253	91	25	2.86244
chrIV	706495	706495	+	CDS	ARO1	YDR127W	sense	706472	706510	38	6.59623	2.28331	16	7	6.08883
chrIV	706798	706798	+	CDS	ARO1	YDR127W	sense	706782	706807	25	9.64065	2.02961	15	13	9.38695
chrIV	713248	713248	+	intergenic_region	INT_0_1585	INT_0_1585	sense	713248	713324	76	10.6555	3.55182	42	12	2.5543
chrIV	720439	720439	+	intergenic_region	INT_0_1590	INT_0_1590	sense	720439	720466	27	4.82032	2.53701	18	7	3.81277
chrIV	730440	730440	+	3UTR	RGP1	YDR137W	sense	730413	730486	73	14.461	3.55182	52	10	3.29498
chrIV	733572	733572	+	XUTs	XUT_4F-348	571797	sense	733572	733598	26	3.80552	2.53701	13	3	3.04441
chrIV	766620	766701	+	3UTR	GIR2	YDR152W	sense	766599	766702	103	29.1756	13.9536	80	18	2.51229
chrIV	770451	770451	+	3UTR	HOM2	YDR158W	sense	770377	770620	243	24.1016	2.02961	142	48	23.8479
chrIV	771624	771624	+	3UTR	HOM2	YDR158W	sense	771623	771626	3	4.82032	2.02961	2	4	3.55182
chrIV	771677	771677	+	intergenic_region	INT_0_1625	INT_0_1625	sense	771677	771706	29	3.80552	2.28331	11	4	2.96548
chrIV	780390	780403	+	3UTR	YDR161W	YDR161W	sense	780353	780438	85	90.825	20.0424	44	23	4.34597
chrIV	786391	786391	+	3UTR	TRM82	YDR165W	sense	786378	786394	16	4.05922	2.02961	4	4	3.80552
chrIV	792097	792106	+	3UTR	CDC37	YDR168W	sense	792097	792150	53	9.64065	3.55182	26	8	7.83735
chrIV	796092	796092	+	intergenic_region	CUT072	ST0581	sense	796038	796163	125	13.4462	5.58143	72	13	13.1925
chrIV	806614	806600	+	5UTR	HSP42	YDR171W	sense	806523	806642	119	49.7254	14.2073	70	22	6.4539
chrIV	807811	807841	+	3UTR	HSP42	YDR171W	sense	807800	807920	120	139.028	24.1016	49	32	5.31494
chrIV	813224	813222	+	antisense_CDS	INT_0_1653	INT_0_1653	sense	813204	813246	42	20.0424	8.62584	25	12	19.7887
chrIV	817673	817698	+	3UTR	INT_0_1656	INT_0_1656	sense	817669	817768	99	52.5162	19.7887	45	27	3.25634
chrIV	829423	829423	+	3UTR	INT_0_1664	INT_0_1664	antisense	829418	829444	26	5.58143	3.55182	11	5	5.32773
chrIV	832831	832834	+	intergenic_region	INT_0_1670	INT_0_1670	sense	832775	832896	121	26.8923	9.38695	40	16	7.41371
chrIV	850283	850268	+	3UTR	REF2	YDR195W	sense	850268	850298	30	51.2477	18.7739	8	8	2.72922
chrIV	851138	851138	+	intergenic_region	INT_0_1681	INT_0_1681	sense	851138	851147	9	3.04441	2.28331	0	2	2.79071
chrIV	893062	893062	+	CDS	AHA1	YDR214W	sense	892796	893211	415	50.994	2.02961	248	97	50.4865
chrIV	893992	893992	+	3UTR	AHA1	YDR214W	sense	893991	894002	11	10.148	3.04441	6	5	2.25059
chrIV	894572	894572	+	intergenic_region	INT_0_1705	INT_0_1705	sense	894572	894608	36	7.61104	3.55182	13	9	7.35734
chrIV	894742	894744	+	intergenic_region	INT_0_1705	INT_0_1705	sense	894657	894785	128	21.3109	3.29812	40	16	21.0572
chrIV	899312	899309	+	intergenic_region	INT_0_1707	INT_0_1707	sense	899252	899339	87	55.5606	19.535	40	12	7.21513
chrIV	899414	899413	+	intergenic_region	INT_0_1707	INT_0_1707	sense	899412	899444	32	7.35734	2.79071	24	6	7.10363
chrIV	899621	899539	+	antisense_CDS	INT_0_1707	INT_0_1707	sense	899474	899648	174	79.4085	17.2517	139	39	18.2989
chrIV	905132	905127	+	intergenic_region	INT_0_1709	INT_0_1709	sense	905113	905165	52	10.9092	3.04441	9	5	5.56028
chrIV	916075	916002	+	3UTR	HTA1	YDR225W	sense	915970	916075	105	20.8035	9.89435	60	15	2.39691
chrIV	916397	916397	+	intergenic_region	INT_0_1721	INT_0_1721	sense	916388	916424	36	8.11844	4.56662	11	6	7.61104
chrIV	917318	917346	+	3UTR	INT_0_1723	INT_0_1723	sense	917291	917402	111	72.8123	9.38695	59	34	2.68056
chrIV	929444	929433	+	intergenic_region	INT_0_1732	INT_0_1732	sense	929433	929444	11	18.2665	6.84993	10	7	4.76596
chrIV	931104	931122	+	5UTR	LYS4	YDR234W	sense	931074	931246	172	55.8143	5.83513	69	45	19.3286
chrIV	933311	933251	+	3UTR	LYS4	YDR234W	sense	933247	933311	64	31.9664	13.9536	14	6	2.68558
chrIV	933375	933375	+	intergenic_region	INT_0_1734	INT_0_1734	sense	933375	933400	25	5.58143	4.05922	2	3	5.32773
chrIV	955696	955676	+	5UTR	INT_0_1749	INT_0_1749	sense	955667	955726	59	11.1629	3.55182	44	7	3.79511
chrIV	957784	957772	+	3UTR	VHS1	YDR247W	sense	957748	957795	47	36.0256	8.37214	28	13	2.43593
chrIV	975116	975069	+	antisense_CDS	INT_0_1765	INT_0_1765	sense	974750	975303	553	101.48	3.29812	338	156	101.227
chrIV	977479	977479	+	XUTs	XUT_4F-447	571812	sense	977453	977516	63	6.84993	2.28331	27	10	6.59623
chrIV	977604	977604	+	XUTs	XUT_4F-447	571812	sense	977583	977632	49	5.07402	2.28331	23	8	4.56662
chrIV	979342	979341	+	intergenic_region	INT_0_1769	INT_0_1769	sense	979340	979364	24	6.84993	2.79071	15	6	6.59623
chrIV	992766	992763	+	tRNA_100_nt_upstream	INT_0_1774	INT_0_1774	sense	992692	992829	137	40.5922	9.38695	30	24	40.3385
chrIV	1011374	1011379	+	3UTR	DON1	YDR273W	sense	1011357	1011413	56	23.8479	12.4314	30	7	6.56643
chrIV	1011458	1011458	+	intergenic_region	INT_0_1791	INT_0_1791	sense	1011440	1011481	41	8.62584	3.29812	24	9	8.37214
chrIV	1012078	1012079	+	5UTR	INT_0_1791	INT_0_1791	sense	1012034	1012093	59	16.4906	2.02961	16	13	15.7295
chrIV	1016990	1016968	+	intergenic_region	INT_0_1797	INT_0_1797	sense	1016942	1017006	64	14.7147	2.28331	58	17	7.01655
chrIV	1023037	1023035	+	intergenic_region	INT_0_1804	INT_0_1804	sense	1023029	1023054	25	15.7295	5.58143	9	6	15.2221
chrIV	1023104	1023102	+	intergenic_region	INT_0_1804	INT_0_1804	sense	1023075	1023227	152	38.3089	8.62584	94	35	31.7731
chrIV	1023378	1023378	+	intergenic_region	INT_0_1804	INT_0_1804	sense	1023369	1023415	46	9.38695	2.79071	28	7	6.99007
chrIV	1052771	1052771	+	antisense_CDS	INT_0_1820	INT_0_1820	sense	1052770	1052772	2	2.28331	2.02961	-1	1	2.28331
chrIV	1068599	1068599	+	intergenic_region	INT_0_1829	INT_0_1829	sense	1068591	1068634	43	8.87954	3.04441	18	6	8.37214
chrIV	1089167	1089167	+	3UTR	SSF2	YDR312W	sense	1089164	1089168	4	3.29812	3.04441	-1	1	3.29812
chrIV	1095623	1095623	+	intergenic_region	INT_0_1849	INT_0_1849	sense	1095599	1095632	33	8.87954	3.29812	23	5	8.62584
chrIV	1108299	1108299	+	5UTR	INT_0_1856	INT_0_1856	sense	1108276	1108329	53	6.59623	2.28331	20	5	6.34253
chrIV	1110100	1110094	+	intergenic_region	INT_0_1860	INT_0_1860	sense	1110035	1110116	81	62.6642	31.459	52	19	5.10861
chrIV	1112355	1112355	+	intergenic_region	INT_0_1861	INT_0_1861	sense	1112355	1112356	1	2.02961	2.02961	-1	1	2.02961
chrIV	1129580	1129565	+	3UTR	UBX5	YDR330W	sense	1129564	1129641	77	33.2349	13.6999	49	17	2.80986
chrIV	1166114	1166114	+	CUTs	XUT_4F-526	571826	sense	1166042	1166270	228	26.1312	2.02961	152	47	15.4326
chrIV	1189495	1189495	+	3UTR	SPC110	YDR356W	sense	1189484	1189507	23	10.9092	5.58143	7	4	4.94247
chrIV	1196630	1196630	+	SUTs	SUT072	ST0693	sense	1196626	1196649	23	3.80552	2.79071	5	3	3.55182
chrIV	1201486	1201486	+	3UTR	ESC2	YDR363W	sense	1201486	1201490	4	4.31292	2.02961	0	2	3.55182
chrIV	1201843	1201843	+	tRNA_100_nt_downstream	INT_0_1927	INT_0_1927	sense	1201833	1201857	24	6.84993	2.02961	9	6	4.58944
chrIV	1202819	1202821	+	intergenic_region	INT_0_1928	INT_0_1928	sense	1202650	1202855	205	118.732	20.8035	158	45	3.43473
chrIV	1213703	1213703	+	3UTR	KEI1	YDR367W	sense	1213703	1213728	25	4.82032	3.55182	5	3	2.1182
chrIV	1213786	1213781	+	intergenic_region	INT_0_1933	INT_0_1933	sense	1213770	1213830	60	19.2813	5.32773	14	13	5.29551
chrIV	1213864	1213864	+	5UTR	YPR1	YDR368W	sense	1213862	1213865	3	2.79071	2.53701	-1	1	2.79071
chrIV	1225309	1225309	+	3UTR	INT_0_1942	INT_0_1942	sense	1225267	1225331	64	8.62584	2.28331	23	9	2.68849
chrIV	1229343	1229373	+	intergenic_region	INT_0_1945	INT_0_1945	sense	1229328	1229537	209	76.1104	9.38695	69	32	3.13536
chrIV	1234132	1234132	+	5UTR	ARO10	YDR380W	sense	1234132	1234154	22	5.32773	3.80552	3	3	5.07402
chrIV	1238195	1238346	+	3UTR	YRA1	YDR381W	sense	1238173	1238426	253	532.519	107.569	146	82	2.97058
chrIV	1241138	1241149	+	intergenic_region	INT_0_1956	INT_0_1956	sense	1241129	1241246	117	41.8607	10.148	41	19	41.607
chrIV	1254974	1254971	+	3UTR	SAC7	YDR389W	sense	1254971	1255009	38	21.0572	11.6703	6	7	2.19967
chrIV	1259958	1259980	+	CDS	SHE9	YDR393W	sense	1259953	1260015	62	11.924	3.55182	37	12	6.08983
chrIV	1263061	1263112	+	3UTR	RPT3	YDR394W	sense	1263005	1263130	125	399.833	132.178	10	12	2.11418
chrIV	1266433	1266433	+	CDS	YDR396W	YDR396W	sense	1266433	1266463	30	5.83513	4.31292	3	2	5.58143
chrIV	1269766	1269766	+	intergenic_region	INT_0_1976	INT_0_1976	sense	1269766	1269782	16	3.29812	2.02961	3	3	3.04441
chrIV	1270840	1270841	+	3UTR	URH1	YDR400W	sense	1270840	1270843	3	5.83513	2.79071	0	2	2.91253
chrIV	1289133	1289133	+	XUTs	XUT_4F-592	571834	sense	1289133	1289146	13	3.29812	2.28331	3	3	3.04441
chrIV	1293267	1293267	+	intergenic_region	INT_0_1990	INT_0_1990	sense	1293196	1293270	74	7.61104	2.28331	61	14	7.10363
chrIV	1302683	1302698	+	CUTs	CUT091	ST0731	sense	1302618	1302801	183	135.73	23.0868	69	43	11.3691
chrIV	1319735	1319744	+	CUTs	XUT_4F-605	571836	sense	1319647	1319908	261	51.2477	4.05922	148	63	19.2564
chrIV	1323513	1323513	+	CUTs	CUT093	ST0738	sense	1323508	1323573	65	7.86474	2.28331	39	8	2.88846
chrIV	1324425	1324440	+	CUTs	CUT093	ST0738	sense	1324425	1324535	110	37.8015	17.5054	58	15	15.6747
chrIV	1330323	1330313	+	3UTR	YDR433W	YDR433W	sense	1330305	1330340	35	81.9455	35.2645	18	16	2.01103
chrIV	1330788	1330783	+	intergenic_region	INT_0_2020	INT_0_2020	sense	1330695	1330828	133	75.8567	11.1629	27	23	21.0408
chrIV	1352421	1352421	+	3UTR	YDR444W	YDR444W	sense	1352418	1352464	46	15.2221	2.79071	23	14	4.1658
chrIV	1360937	1360937	+	intergenic_region	CUT096	ST0749	sense	1360936	1360946	10	11.4166	5.58143	1	3	3.58465
chrIV	1361047	1361076	+	CUTs	CUT096	ST0749	sense	1360982	1361142	160	53.0236	10.6555	72	17	18.3578
chrIV	1379868	1379868	+	intergenic_region	INT_0_2054	INT_0_2054	sense	1379858	1379905	47	5.07402	2.02961	36	6	4.56662
chrIV	1380443	1380443	+	antisense_CDS	INT_0_2054	INT_0_2054	sense	1380443	1380463	20	4.05922	2.53701	4	2	3.80552
chrIV	1383635	1383635	+	intergenic_region	INT_0_2054	INT_0_2054	sense	1383634	1383647	13	3.80552	2.79071	11	3	3.29812
chrIV	1384973	1384973	+	3UTR	TFB3	YDR460W	sense	1384973	1385013	40	14.7147	10.148	4	5	6.03688
chrIV	1403196	1403231	+	snoRNA_1000_nt_downstream	TRS31	YDR472W	sense	1403042	1403616	574	2006.02	99.9583	152	140	167.444
chrIV	1404432	1404432	+	intergenic_region	INT_0_2073	INT_0_2073	sense	1404411	1404440	29	5.83513	2.79071	20	4	5.58143
chrIV	1410773	1410773	+	SUTs	XUT_4F-645	571844	sense	1410759	1410784	25	8.37214	3.04441	13	9	8.11844
chrIV	1411976	1411974	+	intergenic_region	INT_0_2079	INT_0_2079	sense	1411936	1412020	84	64.1864	24.3553	20	17	10.4216
chrIV	1416463	1416454	+	3UTR	INT_0_2082	INT_0_2082	sense	1416454	1416492	38	11.6703	3.04441	14	6	2.5084
chrIV	1422690	1422690	+	5UTR	INT_0_2087	INT_0_2087	sense	1422672	1422712	40	6.84993	2.53701	6	4	6.59623
chrIV	1427922	1427915	+	antisense_CDS	CUT098	ST0771	sense	1427761	1428113	352	50.4865	3.80552	201	88	34.9504
chrIV	1454520	1454520	+	intergenic_region	INT_0_2110	INT_0_2110	sense	1454520	1454521	1	2.28331	2.28331	-1	1	2.28331
chrIV	1466331	1466331	+	SUTs	SUT080	ST0782	sense	1466328	1466350	22	3.55182	2.28331	3	3	3.29812
chrIV	1485591	1485591	+	CUTs	CUT100	ST0791	sense	1485583	1485592	9	3.29812	2.28331	3	2	3.29812
chrIV	1493458	1493458	+	intergenic_region	INT_0_2153	INT_0_2153	sense	1493438	1493527	89	7.10363	2.53701	49	11	6.84993
chrIV	1499560	1499560	+	antisense_CDS	INT_0_2161	INT_0_2161	sense	1499419	1499561	142	23.5942	2.28331	125	31	2.37652
chrIV	1523755	1523755	+	intergenic_region	INT_0_2183	INT_0_2183	sense	1523755	1523756	1	2.79071	2.79071	-1	1	2.79071
chrXIV	45375	45379	+	antisense_CDS	INT_0_7000	INT_0_7000	sense	45370	45416	46	14.7147	5.83513	16	7	3.29498
chrXIV	49540	49540	+	antisense_CDS	INT_0_7002	INT_0_7002	sense	49518	49548	30	4.05922	2.02961	5	4	3.80552
chrXIV	82641	82618	+	3UTR	MSB3	YNL293W	sense	82603	82652	49	44.144	12.6851	23	17	2.62473
chrXIV	84301	84301	+	antisense_CDS	INT_0_7026	INT_0_7026	sense	84269	84377	108	6.08883	2.28331	75	8	5.07402
chrXIV	89136	89150	+	snoRNA_300_nt_upstream	INT_0_7030	INT_0_7030	sense	89097	89386	289	1164.49	595.437	9	11	83.7969
chrXIV	95038	95034	+	3UTR	SEC21	YNL287W	sense	95034	95054	20	13.4462	6.34253	12	9	2.47124
chrXIV	102917	102897	+	intergenic_region	INT_0_7040	INT_0_7040	sense	102831	102949	118	34.7571	3.55182	59	43	6.00158
chrXIV	109095	108939	+	3UTR	HCH1	YNL281W	sense	108717	109095	378	89.3028	42.3681	225	57	5.44261
chrXIV	109123	109254	+	3UTR	HCH1	YNL281W	sense	109104	109455	351	215.646	19.535	240	152	4.51848
chrXIV	121097	121094	+	3UTR	BOR1	YNL275W	sense	121072	121097	25	12.9388	5.07402	12	4	4.10402
chrXIV	140598	140595	+	3UTR	LYP1	YNL268W	sense	140595	140598	3	32.4738	30.1904	-1	1	2.28331
chrXIV	144393	144392	+	3UTR	PIK1	YNL267W	sense	144317	144574	257	38.5626	8.62584	133	38	5.71158
chrXIV	156890	156886	+	3UTR	ORC5	YNL261W	sense	156829	156915	86	24.3553	6.08883	33	15	8.03152
chrXIV	157031	157031	+	3UTR	ORC5	YNL261W	sense	156937	157118	181	13.6999	2.02961	128	20	7.01655
chrXIV	157358	157358	+	antisense_CDS	INT_0_7074	INT_0_7074	sense	157354	157368	14	3.29812	2.02961	7	4	3.04441
chrXIV	187170	187170	+	antisense_CDS	INT_0_7095	INT_0_7095	sense	187079	187230	151	24.3553	8.11844	77	15	4.57339
chrXIV	196288	196299	+	3UTR	ZWF1	YNL241C	antisense	196288	196300	12	9.89435	4.05922	10	5	4.58944
chrXIV	200500	200500	+	5UTR	LAP3	YNL239W	sense	200478	200501	23	5.32773	2.02961	21	8	5.32773
chrXIV	209958	209958	+	antisense_CDS	INT_0_7111	INT_0_7111	sense	209955	209975	20	5.83513	2.28331	9	7	5.58143
chrXIV	228926	228926	+	3UTR	ATG4	YNL223W	sense	228923	228940	17	11.1629	3.04441	9	8	2.84634
chrXIV	229965	229965	+	CUTs	CUT323	ST2771	sense	229948	230139	191	13.1925	3.80552	90	17	4.15494
chrXIV	255147	255152	+	intergenic_region	INT_0_7145	INT_0_7145	sense	255137	255220	83	24.3553	7.61104	31	21	5.03073
chrXIV	270637	270637	+	SUTs	XUT_14F-101	572842	sense	270565	270678	113	10.6555	2.02961	65	16	10.4018
chrXIV	271199	271199	+	CUTs	CUT328	ST2788	sense	271117	271318	201	15.7295	2.79071	105	31	15.2221
chrXIV	279999	280001	+	3UTR	CHS1	YNL192W	sense	279984	280017	33	238.987	145.371	13	12	2.61579
chrXIV	280085	280085	+	intergenic_region	INT_0_7163	INT_0_7163	sense	280070	280105	35	9.38695	3.55182	21	10	8.62584
chrXIV	282125	282125	+	5UTR	INT_0_7164	INT_0_7164	sense	282125	282475	350	61.3957	5.83513	217	89	18.2317
chrXIV	283782	283778	+	intergenic_region	INT_0_7165	INT_0_7165	sense	283671	283873	202	106.555	35.0108	25	16	8.70125
chrXIV	286133	286124	+	3UTR	SRP1	YNL189W	sense	286124	286157	33	29.683	10.148	11	7	2.31803
chrXIV	292224	292224	+	antisense_CDS	INT_0_7170	INT_0_7170	sense	292186	292235	49	8.11844	3.80552	23	6	7.86474
chrXIV	302408	302408	+	CUTs	CUT329	ST2799	sense	302404	302454	50	8.87954	2.02961	30	17	8.62584
chrXIV	303529	303521	+	intergenic_region	INT_0_7179	INT_0_7179	sense	303520	303529	9	52.0088	40.3385	1	3	3.47991
chrXIV	303550	303590	+	intergenic_region	INT_0_7179	INT_0_7179	sense	303531	303715	184	131.925	13.1925	86	51	3.54628
chrXIV	308957	308957	+	antisense_CDS	INT_0_7183	INT_0_7183	sense	308905	308958	53	7.61104	3.80552	21	8	7.61104
chrXIV	322215	322215	+	intergenic_region	INT_0_7190	INT_0_7190	sense	322215	322234	19	3.04441	2.02961	13	2	2.79071
chrXIV	332475	332475	+	5UTR	CBK1	YNL161W	sense	332419	332535	116	13.9536	3.29812	54	15	13.6999
chrXIV	336610	336610	+	CDS	YGP1	YNL160W	sense	336566	336836	270	28.9219	2.02961	171	56	23.9357
chrXIV	337824	337834	+	3UTR	YGP1	YNL160W	sense	337800	337878	78	114.673	30.6979	21	20	4.38215
chrXIV	341018	341027	+	CUTs	CUT331	ST2812	sense	340976	341100	124	81.9455	47.9495	36	14	6.08983
chrXIV	343552	343552	+	intergenic_region	INT_0_7208	INT_0_7208	sense	343547	343555	8	3.29812	2.79071	-1	1	3.04441
chrXIV	360821	360821	+	intergenic_region	INT_0_7229	INT_0_7229	sense	360769	360832	63	9.64065	2.53701	46	10	3.26556
chrXIV	366635	366676	+	3UTR	YSF3	YNL138W-A	sense	366635	366772	137	12.6851	2.02961	98	22	4.32467
chrXIV	374326	374326	+	CUTs	XUT_14F-142	572850	sense	374292	374406	114	22.5794	10.9092	47	14	5.75887
chrXIV	397901	397901	+	intergenic_region	INT_0_7255	INT_0_7255	sense	397867	397932	65	8.87954	5.07402	38	8	7.20189
chrXIV	402965	402965	+	antisense_CDS	INT_0_7259	INT_0_7259	sense	402957	402986	29	7.10363	2.79071	13	6	6.59623
chrXIV	415873	415873	+	intron	YNL112W_intron	intergenic	sense	415873	415913	40	6.59623	2.02961	32	11	6.34253
chrXIV	416377	416443	+	3UTR	DBP2	YNL112W	sense	416332	416551	219	854.466	119.747	46	37	2.20668
chrXIV	418146	418146	+	CUTs	CUT335	ST2841	sense	417993	418228	235	38.5626	2.02961	147	65	38.3089
chrXIV	442940	442938	+	tRNA_100_nt_upstream	INT_0_7287	INT_0_7287	sense	442838	442952	114	15.9832	5.07402	20	11	15.7295
chrXIV	449529	449529	+	3UTR	APP1	YNL094W	sense	449529	449544	15	3.29812	2.28331	4	3	2.54184
chrXIV	449582	449582	+	3UTR	APP1	YNL094W	sense	449546	449656	110	42.8755	17.2517	43	22	5.93097
chrXIV	473198	473191	+	3UTR	SAL1	YNL083W	sense	473179	473227	48	25.8775	9.38695	15	9	4.07347
chrXIV	481272	481272	+	5UTR	INT_0_7317	INT_0_7317	sense	481267	481275	8	4.82032	2.79071	2	2	3.04441
chrXIV	500482	500468	+	3UTR	RPL9B	YNL067W	sense	500467	500482	15	21.3109	11.924	12	10	3.26556
chrXIV	500555	500628	+	3UTR	RPL9B	YNL067W	sense	500536	500789	253	246.598	39.3237	114	78	5.01653
chrXIV	508752	508758	+	3UTR	MTQ1	YNL063W	sense	508629	508770	141	30.1904	6.08883	70	21	2.99196
chrXIV	509021	509021	+	antisense_CDS	INT_0_7342	INT_0_7342	sense	509020	509058	38	9.64065	2.28331	21	9	9.38695
chrXIV	532532	532532	+	3UTR	COX5A	YNL052W	sense	532530	532573	43	12.9388	5.32773	9	8	7.56501
chrXIV	534017	534017	+	3UTR	COG5	YNL051W	sense	534017	534043	26	5.58143	2.02961	25	9	4.31292
chrXIV	534089	534089	+	3UTR	COG5	YNL051W	sense	534089	534112	23	8.62584	7.61104	-1	1	8.37214
chrXIV	542982	542981	+	3UTR	YNL046W	YNL046W	sense	542981	542982	1	51.7551	49.7254	-1	1	2.02961
chrXIV	545171	545176	+	3UTR	LAP2	YNL045W	sense	545136	545182	46	42.8755	10.9092	26	17	2.2103
chrXIV	557024	557013	+	3UTR	BDP1	YNL039W	sense	556950	557051	101	24.8627	7.10363	58	14	3.66903
chrXIV	568049	568049	+	tRNA_100_nt_upstream	INT_0_7382	INT_0_7382	sense	568013	568051	38	11.4166	2.79071	20	12	11.1629
chrXIV	576664	576661	+	intergenic_region	INT_0_7392	INT_0_7392	sense	576620	576695	75	22.5794	6.34253	26	12	3.88337
chrXIV	581711	581716	+	3UTR	CRZ1	YNL027W	sense	581682	581726	44	27.9071	8.87954	22	10	2.66133
chrXIV	581778	581778	+	intergenic_region	INT_0_7397	INT_0_7397	sense	581778	581814	36	8.62584	4.05922	16	8	5.29551
chrXIV	585921	585910	+	snoRNA	NME1	NME1	sense	585792	585949	157	244.822	19.7887	51	51	72.9267
chrXIV	586378	586354	+	snoRNA_1000_nt_downstream	INT_0_7401	INT_0_7401	sense	586174	586388	214	485.077	46.4273	75	75	52.7879
chrXIV	586423	586489	+	snoRNA_1000_nt_downstream	INT_0_7401	INT_0_7401	sense	586412	586861	449	348.332	13.4462	226	182	85.4757
chrXIV	602247	602242	+	tRNA_100_nt_upstream	INT_0_7415	INT_0_7415	sense	602204	602259	55	58.3513	16.4906	13	14	57.8439
chrXIV	604843	604840	+	intergenic_region	INT_0_7418	INT_0_7418	sense	604820	604896	76	39.5774	21.8183	21	11	3.64802
chrXIV	614523	614522	+	3UTR	YNL010W	YNL010W	sense	614522	614523	1	21.8183	19.535	-1	1	2.28331
chrXIV	614559	614563	+	3UTR	YNL010W	YNL010W	sense	614525	614603	78	91.3324	22.072	30	24	2.97045
chrXIV	621529	621741	+	CUTs	CUT346	ST2916	sense	621524	622083	559	71.7975	2.28331	404	113	22.9744
chrXIV	624846	624846	+	intergenic_region	INT_0_7434	INT_0_7434	sense	624846	624850	4	3.04441	2.53701	-1	1	2.53701
chrXIV	628740	628733	+	3UTR	DOM34	YNL001W	sense	628731	628747	16	21.3109	9.89435	6	8	3.38098
chrXIV	638994	638999	+	3UTR	VPS27	YNR006W	sense	638965	639031	66	33.996	5.32773	22	14	2.23588
chrXIV	644328	644333	+	3UTR	CSE2	YNR010W	sense	644320	644352	32	9.64065	3.04441	5	6	2.61245
chrXIV	653270	653269	+	3UTR	YNR014W	YNR014W	sense	653230	653298	68	32.4738	10.148	9	8	6.11391
chrXIV	662501	662502	+	XUTs	XUT_14F-269	572865	sense	662331	662547	216	29.9367	2.79071	138	36	29.683
chrXIV	663875	663875	+	intergenic_region	INT_0_7467	INT_0_7467	sense	663872	663914	42	10.9092	6.34253	14	8	4.04384
chrXIV	669811	669844	+	3UTR	YNR021W	YNR021W	sense	669795	669855	60	179.367	76.1104	32	24	2.14864
chrXIV	670081	670081	+	antisense_CDS	INT_0_7471	INT_0_7471	sense	670046	670097	51	24.3553	19.0276	0	2	24.1016
chrXIV	697694	697694	+	antisense_CDS	INT_0_7491	INT_0_7491	sense	697675	697716	41	7.10363	4.56662	21	4	6.84993
chrXIV	716408	716505	+	snoRNA_1000_nt_downstream	INT_0_7504	INT_0_7504	sense	716283	717034	751	458.692	26.3849	285	231	28.1441
chrXIV	743751	743751	+	intergenic_region	INT_0_7525	INT_0_7525	sense	743750	743755	5	3.55182	3.04441	-1	1	3.29812
chrXIV	764085	764081	+	intergenic_region	CUT353	ST2967	sense	763968	764123	155	26.1312	3.80552	106	37	23.8479
chrXII	48890	48891	+	intergenic_region	INT_0_5537	INT_0_5537	sense	48889	48905	16	52.2625	11.1629	4	6	7.00374
chrXII	67671	67685	+	3UTR	YLL037W	YLL037W	sense	67664	67727	63	18.7739	9.89435	44	11	9.6643
chrXII	91433	91455	+	3UTR	HSP104	YLL026W	sense	91372	91513	141	974.72	374.97	4	6	3.54665
chrXII	91539	91539	+	intergenic_region	INT_0_5558	INT_0_5558	sense	91534	91556	22	5.83513	5.07402	-1	1	5.58143
chrXII	99067	99067	+	CUTs	CUT246	ST2136	sense	98836	99150	314	58.605	2.79071	166	84	48.7187
chrXII	100499	100487	+	intergenic_region	INT_0_5565	INT_0_5565	sense	100449	100541	92	30.1904	9.89435	29	5	20.829
chrXII	121282	121279	+	intergenic_region	INT_0_5578	INT_0_5578	sense	121279	121352	73	10.4018	4.05922	64	8	5.74941
chrXII	136438	136438	+	CDS	YLL006W-A	YLL006W-A	sense	136420	136450	30	4.82032	2.02961	6	3	4.56662
chrXII	146147	146147	+	3UTR	SFI1	YLL003W	sense	146147	146165	18	3.04441	2.28331	4	2	2.79071
chrXII	154365	154365	+	antisense_CDS	INT_0_5597	INT_0_5597	sense	154365	154406	41	6.84993	3.80552	26	5	6.59623
chrXII	165572	165572	+	intergenic_region	INT_0_5605	INT_0_5605	sense	165546	165586	40	10.4018	2.02961	29	10	8.47281
chrXII	184604	184641	+	antisense_CDS	INT_0_5620	INT_0_5620	sense	184604	184664	60	20.8035	3.29812	34	16	3.29951
chrXII	199391	199370	+	snoRNA_1000_nt_downstream	SNR30	snR30	sense	199327	199391	64	10.9092	6.08883	27	5	4.82032
chrXII	199573	199567	+	snoRNA_1000_nt_downstream	INT_0_5631	INT_0_5631	sense	199392	199884	492	1411.09	55.3069	144	143	64.7216
chrXII	221487	221484	+	XUTs	XUT_12F-84	572584	sense	221384	221505	121	14.461	4.82032	55	8	8.47281
chrXII	230678	230677	+	XUTs	XUT_12F-90	572588	sense	230677	230707	30	5.32773	2.28331	7	5	5.07402
chrXII	231655	231661	+	intergenic_region	SUT251	ST2173	sense	231545	231826	281	77.1252	4.05922	113	72	26.7423
chrXII	235670	235647	+	SUTs	SUT252	ST2174	sense	235619	235675	56	14.9684	3.80552	50	14	5.03073
chrXII	243746	243754	+	CUTs	CUT253	ST2176	sense	243730	243808	78	65.4549	11.6703	44	20	5.04054
chrXII	249216	249216	+	CUTs	CUT254	ST2180	sense	249202	249485	283	22.8331	2.02961	196	46	22.3257
chrXII	260794	260793	+	5UTR	SUT255	ST2183	sense	260685	260812	127	9.13324	2.28331	107	16	8.11844
chrXII	262884	262883	+	3UTR	FRS1	YLR060W	sense	262883	262884	1	4.82032	2.79071	0	2	2.02961
chrXII	264234	264250	+	CDS	YLR063W	YLR063W	sense	264198	264254	56	10.6555	2.28331	24	10	10.4018
chrXII	266414	266411	+	3UTR	YLR064W	YLR064W	sense	266410	266429	19	16.4906	7.35734	5	5	3.51176
chrXII	268097	268037	+	antisense_CDS	CUT255	ST2189	sense	267964	268204	240	45.6662	6.34253	171	53	9.47896
chrXII	268307	268307	+	antisense_CDS	INT_0_5689	INT_0_5689	sense	268286	268336	50	5.07402	3.04441	11	4	4.82032
chrXII	281019	281013	+	3UTR	YLR072W	YLR072W	sense	281013	281023	10	10.4018	7.10363	5	2	2.23588
chrXII	283828	283828	+	5UTR	INT_0_5700	INT_0_5700	sense	283797	283938	141	11.1629	2.79071	89	19	7.59023
chrXII	309092	309092	+	antisense_CDS	INT_0_5718	INT_0_5718	sense	309088	309093	5	2.79071	2.28331	-1	1	2.53701
chrXII	320493	320492	+	5UTR	INT_0_5720	INT_0_5720	sense	320479	320541	62	12.9388	4.56662	22	10	3.30969
chrXII	322244	322242	+	3UTR	XDJ1	YLR090W	sense	322211	322268	57	12.1777	5.07402	25	9	5.41319
chrXII	365796	365796	+	3UTR	REX3	YLR107W	sense	365745	365812	67	14.461	6.34253	21	10	4.48082
chrXII	366331	366333	+	snRNA	SNR6	snR6	sense	366283	366681	398	1552.4	232.39	31	30	62.3037
chrXII	369432	369432	+	intergenic_region	INT_0_5748	INT_0_5748	sense	369402	369499	97	27.146	2.28331	49	33	4.31788
chrXII	373081	373088	+	3UTR	HOG1	YLR113W	sense	373069	373124	55	27.9071	9.38695	26	14	2.4477
chrXII	373284	373273	+	intergenic_region	INT_0_5751	INT_0_5751	sense	373210	373301	91	23.3405	8.11844	55	16	23.0868
chrXII	373339	373339	+	intergenic_region	INT_0_5751	INT_0_5751	sense	373339	373418	79	12.9388	5.83513	36	11	12.6851
chrXII	374247	374248	+	intergenic_region	INT_0_5752	INT_0_5752	sense	374234	374291	57	32.7275	6.84993	46	17	9.03767
chrXII	374560	374559	+	intergenic_region	INT_0_5753	INT_0_5753	sense	374485	374646	161	27.3997	2.53701	50	29	27.146
chrXII	388946	388946	+	3UTR	YLR120W-A	YLR120W-A	sense	388714	389338	624	103.256	2.28331	393	169	39.0905
chrXII	390471	390471	+	intergenic_region	INT_0_5761	INT_0_5761	sense	390471	390483	12	3.04441	2.53701	-1	1	2.79071
chrXII	395293	395276	+	3UTR	YLR125W	YLR125W	sense	395238	395313	75	9.13324	2.28331	22	8	3.60095
chrXII	395517	395517	+	CUTs	CUT256	ST2224	sense	395517	395545	28	5.83513	2.28331	15	6	5.58143
chrXII	395584	395580	+	CUTs	CUT256	ST2224	sense	395570	395600	30	8.11844	2.53701	15	7	6.56643
chrXII	397137	397137	+	CUTs	CUT258	ST2227	sense	397118	397185	67	7.86474	2.02961	30	7	7.61104
chrXII	397404	397404	+	antisense_CDS	CUT258	ST2227	sense	397401	397440	39	5.32773	2.02961	30	6	5.07402
chrXII	412536	412544	+	3UTR	PDC5	YLR134W	sense	412485	412561	76	100.719	83.7214	-1	1	3.03916
chrXII	418150	418144	+	3UTR	YLR137W	YLR137W	sense	418144	418173	29	48.7106	19.7887	12	12	2.49739
chrXII	418370	418370	+	3UTR	NHA1	YLR138W	sense	418366	418379	13	3.29812	2.02961	8	3	2.53701
chrXII	426750	426749	+	intergenic_region	INT_0_5793	INT_0_5793	sense	426739	426812	73	113.151	65.7086	4	4	2.61833
chrXII	434249	434248	+	3UTR	YLR146W-A	YLR146W-A	sense	434164	434389	225	35.0108	2.79071	104	43	8.53511
chrXII	448422	448422	+	intergenic_region	INT_0_5809	INT_0_5809	sense	448141	448672	531	71.5438	2.28331	328	128	71.2901
chrXII	450804	450785	+	intergenic_region	INT_0_5814	INT_0_5814	sense	450668	450860	192	61.142	8.87954	99	36	11.0515
chrXII	459893	459893	+	intergenic_region	INT_0_5819	INT_0_5819	sense	459867	459993	126	35.2645	3.04441	68	45	20.8794
chrXII	460065	460065	+	XUTs	INT_0_5819	INT_0_5819	sense	460051	460167	116	19.0276	2.53701	49	24	8.70817
chrXII	460296	460291	+	XUTs	XUT_12F-188	572606	sense	460291	460374	83	13.6999	3.29812	14	13	2.75366
chrXII	460591	460572	+	XUTs	XUT_12F-188	572606	sense	460406	460651	245	1242.63	154.25	102	100	258.739
chrXII	490678	490653	+	intergenic_region	INT_0_5839	INT_0_5839	sense	490604	490716	112	49.9791	14.9684	66	34	3.14521
chrXII	499625	499610	+	5UTR	UPS2	YLR168C	antisense	499587	499708	121	53.2773	27.146	40	25	5.39884
chrXII	500396	500396	+	CDS	YLR169W	YLR169W	sense	500360	500446	86	7.35734	2.02961	44	11	7.10363
chrXII	501173	501165	+	3UTR	INT_0_5852	INT_0_5852	antisense	500803	501189	386	63.1716	7.61104	198	78	62.4105
chrXII	505906	505900	+	3UTR	IDP2	YLR174W	sense	505893	505938	45	41.3533	13.4462	26	9	4.39935
chrXII	513013	512993	+	3UTR	YLR177W	YLR177W	sense	512993	513040	47	99.9583	58.3513	3	5	2.93118
chrXII	516904	516903	+	antisense_CDS	INT_0_5866	INT_0_5866	sense	516883	516961	78	9.38695	4.31292	4	4	6.35461
chrXII	523508	523508	+	intergenic_region	INT_0_5871	INT_0_5871	sense	523491	523572	81	10.6555	2.79071	40	10	4.8248
chrXII	524593	524593	+	intergenic_region	INT_0_5872	INT_0_5872	sense	524493	524609	116	24.1016	4.56662	98	22	2.89695
chrXII	542392	542392	+	CUTs	CUT265	ST2269	sense	542185	542509	324	31.2053	2.53701	218	62	30.9516
chrXII	543288	543327	+	XUTs	XUT_12F-209	572611	sense	543283	543474	191	55.5606	8.37214	128	47	25.6538
chrXII	543590	543584	+	intergenic_region	XUT_12F-209	572611	sense	543538	543655	117	15.4758	2.53701	53	15	15.2221
chrXII	545932	545923	+	intergenic_region	INT_0_5884	INT_0_5884	sense	545889	545943	54	25.8775	8.62584	25	13	2.46303
chrXII	560811	560812	+	3UTR	INT_0_5895	INT_0_5895	sense	560744	560868	124	78.9011	19.7887	32	20	3.95568
chrXII	570981	570978	+	5UTR	YLR217W	YLR217W	sense	570955	571019	64	22.072	5.58143	23	11	21.3109
chrXII	576692	576692	+	5UTR	INT_0_5908	INT_0_5908	sense	576652	576700	48	7.35734	4.05922	21	6	5.93097
chrXII	576746	576746	+	5UTR	CCC1	YLR220W	sense	576738	576771	33	12.6851	3.04441	14	9	4.32467
chrXII	622982	622982	+	3UTR	YLR241W	YLR241W	sense	622978	623016	38	9.13324	3.80552	28	8	6.17809
chrXII	628310	628305	+	tRNA_100_nt_upstream	ERF2	YLR246W	sense	628270	628342	72	27.9071	3.55182	41	22	7.21513
chrXII	628451	628451	+	tRNA_100_nt_upstream	tL%28CAA%29L_intron	intergenic	sense	628431	628501	70	21.8183	2.02961	44	27	21.5646
chrXII	642318	642361	+	3UTR	YLR252W	YLR252W	sense	642305	642468	163	61.9031	9.89435	138	46	5.25228
chrXII	659882	659870	+	3UTR	YLR257W	YLR257W	sense	659870	659882	12	12.6851	9.13324	11	4	2.96548
chrXII	659903	659886	+	3UTR	YLR257W	YLR257W	sense	659887	659903	16	178.352	103.51	5	7	2.01571
chrXII	659989	659994	+	intergenic_region	INT_0_5969	INT_0_5969	sense	659986	660043	57	14.9684	7.86474	22	6	14.7147
chrXII	663249	663249	+	intergenic_region	INT_0_5971	INT_0_5971	sense	663217	663272	55	6.84993	4.82032	18	4	5.50733
chrXII	669444	669425	+	intergenic_region	SUT279	ST2307	sense	669373	669607	234	46.681	4.05922	128	63	46.4273
chrXII	674341	674351	+	3UTR	RPS28B	YLR264W	sense	674288	674364	76	12.6851	2.28331	51	12	12.4314
chrXII	678224	678224	+	CDS	BOP2	YLR267W	sense	678220	678246	26	6.59623	5.58143	-1	1	6.34253
chrXII	706224	706224	+	3UTR	YLR283W	YLR283W	sense	706224	706284	60	10.9092	2.28331	40	10	3.85128
chrXII	719869	719869	+	CUTs	CUT269	ST2322	sense	719765	720118	353	53.531	5.07402	177	85	53.2773
chrXII	722463	722463	+	CUTs	CUT270	ST2323	sense	722274	722500	226	27.146	2.79071	144	46	26.8923
chrXII	724721	724732	+	3UTR	YLR297W	YLR297W	sense	724699	724743	44	49.9791	15.4758	8	7	3.09827
chrXII	728230	728226	+	3UTR	ECM38	YLR299W	sense	728186	728278	92	26.6386	4.31292	44	18	3.05963
chrXII	730604	730608	+	intergenic_region	INT_0_6031	INT_0_6031	sense	730559	730625	66	35.7719	12.1777	47	12	2.45927
chrXII	760431	760430	+	antisense_CDS	INT_0_6048	INT_0_6048	sense	760423	760440	17	8.62584	6.08883	5	3	8.37214
chrXII	760477	760477	+	antisense_CDS	INT_0_6048	INT_0_6048	sense	760461	760484	23	4.82032	3.29812	16	4	4.31292
chrXII	789877	789877	+	intergenic_region	INT_0_6070	INT_0_6070	sense	789829	789890	61	11.4166	2.02961	46	13	2.45266
chrXII	789916	789916	+	intergenic_region	INT_0_6070	INT_0_6070	sense	789916	789941	25	3.55182	2.53701	16	3	3.29812
chrXII	797111	797111	+	tRNA_100_nt_upstream	INT_0_6075	INT_0_6075	sense	797027	797123	96	16.7443	3.04441	52	16	9.83452
chrXII	813986	813988	+	CDS	FKS1	YLR342W	sense	813965	814021	56	24.8627	6.59623	19	13	24.609
chrXII	815966	815967	+	CDS	YLR342W-A	YLR342W-A	sense	815924	816001	77	43.3829	9.13324	31	14	3.15872
chrXII	816125	816126	+	3UTR	YLR342W-A	YLR342W-A	sense	816074	816174	100	37.8015	7.35734	29	18	8.70817
chrXII	817825	817820	+	3UTR	GAS2	YLR343W	sense	817760	817912	152	59.1124	12.1777	30	14	7.44581
chrXII	818075	818075	+	3UTR	XUT_12R-299	572676	antisense	818052	818083	31	8.37214	6.84993	-1	1	7.86474
chrXII	818497	818488	+	intergenic_region	INT_0_6092	INT_0_6092	sense	818444	818545	101	16.7443	5.58143	48	12	16.4906
chrXII	818821	818822	+	intergenic_region	INT_0_6094	INT_0_6094	sense	818784	818888	104	20.0424	2.28331	35	18	19.7887
chrXII	820429	820428	+	5UTR	INT_0_6095	INT_0_6095	sense	820324	820436	112	22.072	5.32773	60	18	2.93815
chrXII	820505	820505	+	5UTR	YLR345W	YLR345W	sense	820479	820531	52	6.84993	3.55182	25	4	6.34253
chrXII	822141	822160	+	3UTR	YLR345W	YLR345W	sense	822138	822268	130	21.8183	5.07402	107	25	3.75099
chrXII	827113	827090	+	antisense_CDS	INT_0_6099	INT_0_6099	sense	826953	827218	265	52.5162	2.79071	100	56	27.2719
chrXII	829484	829517	+	3UTR	ORM2	YLR350W	sense	829481	829553	72	46.9347	9.89435	32	14	2.66952
chrXII	840116	840123	+	CUTs	CUT273	ST2352	sense	839977	840273	296	54.5458	3.04441	116	68	54.2921
chrXII	856095	856093	+	5UTR	RPS22B	YLR367W	sense	856023	856159	136	566.515	163.891	12	14	262.657
chrXII	856940	856940	+	snoRNA_1000_nt_downstream	YLR367W_intron	intergenic	sense	856919	856954	35	9.64065	6.59623	7	5	9.38695
chrXII	857056	857039	+	snoRNA_1000_nt_downstream	YLR367W_intron	intergenic	sense	856982	857070	88	47.9495	13.4462	70	21	47.6958
chrXII	857518	857516	+	snoRNA_1000_nt_downstream	INT_0_6130	INT_0_6130	sense	857464	857541	77	28.1608	15.7295	4	5	27.9071
chrXII	868837	868821	+	antisense_CDS	INT_0_6136	INT_0_6136	sense	868707	868879	172	32.7275	5.07402	102	26	13.5565
chrXII	874973	874973	+	SUTs	SUT281	ST2367	sense	874959	874981	22	5.32773	2.28331	13	5	3.53034
chrXII	876880	876880	+	antisense_CDS	INT_0_6143	INT_0_6143	sense	876879	876886	7	6.59623	4.05922	0	2	6.34253
chrXII	899407	899543	+	snoRNA_1000_nt_downstream	ECM19	YLR390W	sense	899352	900376	1024	1088.12	43.3829	489	390	89.0476
chrXII	903471	903466	+	3UTR	ECM19	YLR390W	sense	903411	903474	63	15.9832	5.07402	10	6	2.71683
chrXII	903496	903505	+	3UTR	ECM19	YLR390W	sense	903493	903509	16	9.64065	2.53701	11	8	2.38298
chrXII	905021	905026	+	antisense_CDS	INT_0_6160	INT_0_6160	sense	904997	905098	101	13.6999	3.04441	33	10	13.4462
chrXII	911377	911373	+	CUTs	SUT282	ST2379	sense	911293	911406	113	21.5646	3.55182	57	21	7.32545
chrXII	912432	912460	+	CUTs	CUT276	ST2380	sense	912415	912558	143	25.1164	4.31292	73	23	24.8627
chrXII	915197	915197	+	antisense_CDS	INT_0_6166	INT_0_6166	sense	915158	915198	40	8.62584	5.58143	3	2	8.37214
chrXII	928077	928077	+	intergenic_region	INT_0_6176	INT_0_6176	sense	928077	928109	32	15.9832	12.4314	1	3	5.96948
chrXII	941217	941217	+	intergenic_region	INT_0_6187	INT_0_6187	sense	941196	941222	26	4.05922	2.02961	23	5	3.80552
chrXII	948145	948145	+	3UTR	CTR3	YLR411W	sense	948145	948154	9	15.2221	10.4018	0	2	4.46336
chrXII	950238	950238	+	intergenic_region	INT_0_6191	INT_0_6191	sense	950177	950326	149	13.1925	2.28331	106	21	10.8028
chrXII	953325	953319	+	3UTR	YLR413W	YLR413W	sense	953320	953325	5	8.87954	5.83513	4	3	2.54184
chrXII	986878	986878	+	3UTR	INT_0_6209	INT_0_6209	antisense	986878	986883	5	3.29812	2.02961	4	3	2.53701
chrXII	991784	991784	+	CDS	CRN1	YLR429W	sense	991760	991794	34	3.80552	2.02961	25	5	3.55182
chrXII	993005	993003	+	intergenic_region	INT_0_6215	INT_0_6215	sense	992997	993065	68	20.2961	6.84993	49	12	9.17888
chrXII	1002511	1002538	+	5UTR	IMD3	YLR432W	sense	1002403	1002947	544	337.423	23.8479	231	183	127.959
chrXII	1004349	1004374	+	3UTR	IMD3	YLR432W	sense	1004340	1004492	152	82.4529	20.0424	63	30	7.00304
chrXII	1007214	1007257	+	intergenic_region	INT_0_6221	INT_0_6221	sense	1007184	1007350	166	101.48	15.7295	94	46	3.32741
chrXII	1015617	1015616	+	antisense_CDS	INT_0_6228	INT_0_6228	sense	1015602	1015645	43	7.61104	2.28331	13	7	3.83924
chrXII	1039142	1039142	+	intergenic_region	INT_0_6245	INT_0_6245	sense	1039106	1039184	78	18.5202	8.62584	41	14	12.7092
chrXII	1043067	1043067	+	CUTs	XUT_12F-404	572633	sense	1043052	1043085	33	6.34253	2.53701	18	8	6.08883
chrXII	1059597	1059597	+	intergenic_region	INT_0_6258	INT_0_6258	sense	1059587	1059601	14	10.4018	3.80552	7	5	7.35734
[truncated: 1,721 more rows]

## Sheet: RRP6_DIS3_FRB_QuantSeq
chromosome	peak coord	center of mass coordinate for cluster	strand	annotation type	gene name	gene ID	strandedness	cluster start	cluster end	cluster width	total cluster reads	peak height (reads)	width around peak accounting for 80.0% of signal	distinct number of three prime ends accounting for 80.0% of signal	fold upregulation	fold upregulation in RRP6-FRB over RRP6/SEN1-FRB
[truncated: 3,316 more rows]

[truncated: 5 more sheets: WT(HHY168)_QuantSeq, xPATs_with_DS_footprint, xPATs_without_DS_footprint, WT_PATs_with_DS_footprint, WT_PATs_without_DS_footprint]
