# Supplementary material for: Common genomic elements promote transcriptional and DNA replication roadblocks
Source: HighWire-hosted journal article supplement (doi:10.1101/gr.204776.116), 2016-08-18
Supplement: Supplemental_Table_S2.xlsx [file Supplemental_Table_S2.xlsx]

## Sheet: Sheet1
snoRNA	strand	chromosome	coordinate of mature three prime end	termination window start	termination window end	total termination region signal	reads for peak	termination region peak	termination region center of mass	previously determined termination site (Schaughency et al., PLoS Genet., 2014)	distance downstream of mature snoRNA terminus for previously determined termination site (Schaughency et al., PLoS Genet., 2014)	difference between this study (center of mass) and Schaughency et al., PLoS Genet., 2014	difference between this study (peak coordinate) and Schaughency et al., PLoS Genet., 2014	does termination site from Schaughency et al., PLoS Genet., 2014 lie within 50 bp of termination region from this study?	DNase I resistant footprint downstream peak
snR83	+	chrXIII	626654	626732	626900	1069.74	45.25	626881	626870	626531	-123	339	350	no	-
snR53	+	chrV	61789	61835	61907	343.233	17.3076	61849	61900	61707	-82	193	142	no	-
snR87	-	chrXI	431030	430550	430867	239.596	5.21314	430682	430716	431096	-66	380	414	no	-
snR43	-	chrIII	107504	107128	107410	795.107	27.3168	107311	107251	107553	-49	302	242	no	-
snR65	+	chrIII	177282	177370	177501	394.53	13.9712	177473	177453	177256	-26	197	217	no	-
snR8	+	chrXV	832521	832546	832713	2403.67	345.735	832612	832650	832499	-22	151	113	no	+
snR81	+	chrXV	234546	234571	234722	819.505	213.947	234588	234657	234528	-18	129	60	no	+
snR85	-	chrXIII	67768	67689	67713	514.432	206.232	67697	67675	67783	-15	108	86	no	+
snR39B	-	chrVII	366374	366258	366278	1364.38	385.564	366262	366260	366381	-7	121	119	no	+
snR63	-	chrIV	323217	322837	323139	619.738	54.6337	322999	322939	323224	-7	285	225	no	-
snR36	-	chrXV	680685	680198	680623	199.35	13.5542	680569	680386	680692	-7	306	123	no	-
snR56	+	chrII	88277	88346	88482	1487.41	78.6141	88413	88437	88276	-1	161	137	no	-
snR31	-	chrXV	841958	841576	841904	571.777	44.833	841889	841730	841956	2	226	67	no	-
snR60	-	chrX	349130	348596	348984	2345.91	47.7523	348885	348812	349128	2	316	243	no	-
snR189	-	chrIII	178610	178345	178520	495.665	30.6532	178497	178431	178587	23	156	90	no	+
snR128	-	chrX	139566	139223	139414	5903.36	199.35	139247	139285	139535	31	250	288	no	-
snR49	+	chrXIV	716284	716380	716666	897.702	34.8237	716408	716555	716317	33	238	91	no	+
snR30	+	chrXII	199389	199498	199651	4110.04	167.237	199583	199596	199426	37	170	157	no	-
snR46	+	chrVII	545566	545733	546101	314.873	9.17512	545892	545965	545603	37	362	289	no	-
snR33	-	chrIII	142364	142059	142269	1503.47	119.485	142259	142144	142316	48	172	57	no	-
snR161	-	chrII	307185	307084	307138	477.106	155.143	307100	307072	307132	53	60	32	yes	+
snR58	-	chrXV	136088	135797	135983	890.404	38.7857	135930	135884	136035	53	151	105	no	-
snR32	+	chrVIII	381727	381794	382007	2223.09	81.9505	381917	381964	381790	63	174	127	no	-
snR69	+	chrXI	364876	364998	365467	594.089	13.9712	365072	365217	364951	75	266	121	no	-
snR42	-	chrXI	559016	558649	558978	504.006	11.6774	558935	558770	558934	82	164	-1	yes	-
snR48	+	chrVII	609696	609819	609941	1857.34	212.487	609892	609909	609780	84	129	112	no	+
snR47	-	chrIV	541602	541233	541471	1961.81	84.8699	541394	541342	541516	86	174	122	no	+
snR5	+	chrXV	842606	842728	842876	3825.61	332.807	842794	842816	842694	88	122	100	no	-
snR37	-	chrX	228094	227785	227993	4203.87	223.122	227948	227859	228003	91	144	55	no	-
snR50	+	chrXV	259578	259777	259925	1217.79	64.0173	259829	259860	259670	92	190	159	no	-
snR79	-	chrXII	348427	348121	348302	678.333	25.6486	348198	348196	348332	95	136	134	no	-
snR82	+	chrVII	317055	317162	317360	656.438	49.6291	317220	317280	317151	96	129	69	no	-
snR10	+	chrVII	346230	346423	346682	4033.92	150.138	346519	346546	346326	96	220	193	no	-
snR34	+	chrXII	899382	899459	899791	1765.58	51.9228	899616	899643	899483	101	160	133	yes	-
snR13	+	chrIV	1403042	1403196	1403302	7866	403.914	1403216	1403252	1403160	118	92	56	no	-
snR45	+	chrXVI	821903	821984	822386	1787.48	94.6705	822146	822230	822025	122	205	121	yes	+
snR35	-	chrXV	759326	758995	759252	947.957	23.7719	759208	759095	759197	129	102	-11	yes	-
snR64	+	chrXI	38911	39027	39183	1334.15	70.0645	39085	39120	39050	139	70	35	yes	+
snR66	+	chrXIV	586175	586323	586629	1581.04	126.783	586378	586462	586314	139	148	64	no	-
snR62	-	chrXV	409765	408994	409451	263.159	6.67281	409158	409256	409624	141	368	466	no	-
snR3	+	chrX	663942	664111	664714	940.867	51.7143	664026	664387	664089	147	298	-63	no	-
snR71	+	chrVIII	411317	411462	411681	855.58	66.1026	411593	411605	411468	151	137	125	yes	-
snR4	+	chrV	424883	424992	425454	2001.64	42.1221	425130	425268	425034	151	234	96	yes	-
snR61	-	chrXII	794486	794134	794391	1646.93	60.6809	794284	794225	794281	205	56	-3	yes	-
snR86	-	chrXIII	762110	761840	762016	1228.21	56.7189	761965	761913	N/A	N/A	108	86	N/A	-
snR51	-	chrXVI	718700	718418	718639	1088.09	50.4632	718504	718491	N/A	N/A	108	86	N/A	-
snR72	+	chrXIII	298651	298676	298782	158.479	19.8099	298707	298745	N/A	N/A	193	142	N/A	+
snR68	+	chrIX	97246	97273	97515	658.732	122.196	97279	97428	N/A	N/A	197	217	N/A	-
snR9	-	chrXV	407948	407630	407891	526.735	23.3548	407887	407734	N/A	N/A	226	67	N/A	-
snR84	-	chrIV	1492477	1492002	1492451	135.75	3.33641	1492411	1492130	N/A	N/A	285	225	N/A	-
snR80	-	chrV	52150	51725	52006	520.688	34.4067	51735	51814	N/A	N/A	302	242	N/A	+
snR11	+	chrXIII	652532	652750	653131	1830.44	46.2926	652955	652969	N/A	N/A	339	350	N/A	-
