# Supplementary material for: Common genomic elements promote transcriptional and DNA replication roadblocks
Source: HighWire-hosted journal article supplement (doi:10.1101/gr.204776.116), 2016-08-18
Supplement: Supplemental_Table_S3.xlsx [file Supplemental_Table_S3.xlsx]

## Sheet: TFIIIB_roadblock_sites
cluster peak strand	cluster peak chromosome	motif start	motif end	motif_strand	motif_sequence	mismatches from consensus	category	criteria for calling site	total cluster signal	distance from motif boundary to cluster peak (bp)	type of region	gene name	gene strand
-	chrIX	336440	336470	-	TTTAAAAAAACATATACTATACAAATAAAC	0	query_pA_signal_upstream_feature	13.7627	6.88134	-29	XUTs	INT_0_2441	sense
-	chrIX	183533	183563	-	CTCTATCAGTACTAATATTAAATTTACATG	0	query_pA_signal_upstream_feature	21.6866	10.8433	-15	intergenic_region	INT_0_2311	sense
+	chrIX	370367	370397	+	ATCAAATTAGTAGTACATAAGATCGAAGTA	0	query_pA_signal_upstream_feature	12.5115	6.25576	-16	intergenic_region	INT_0_2465	sense
+	chrIX	174981	175011	+	CTAGATAAATAGTATAGCTTGATGAAGAGT	0	query_pA_signal_upstream_feature	42.9562	21.4781	-20	intergenic_region	INT_0_2301	sense
-	chrX	543064	543094	-	TTCAATTGTATATGTGTTATGTAGTATACT	0	query_pA_signal_upstream_feature	7.50692	3.75346	-19	intergenic_region	INT_0_4870	sense
-	chrX	524113	524143	-	TCCCATGCCAGGTGGACAGTGTTGTCCTTA	0	query_pA_signal_upstream_feature	10.0616	11.6774	-14	SUTs	SUT640	sense
-	chrX	116030	116060	-	GTTAATTTGGTAAGTAGTACTATTAGGTGT	0	query_pA_signal_upstream_feature	169.74	84.8699	-15	intergenic_region	INT_0_4545	sense
-	chrX	424535	424565	-	ATGATGTATGACTTATATAACATCTATTTC	0	query_pA_signal_upstream_feature	35.8664	17.9332	-14	intergenic_region	INT_0_4783	sense
-	chrX	59192	59222	-	TGTTTGTGGAATATAACCGTTAAAATAGGT	0	query_pA_signal_upstream_feature	5.00461	2.50231	-14	intergenic_region	INT_0_4491	sense
+	chrX	531778	531808	+	TCATTATTTTGTAACTGTACACATAATTGA	0	query_pA_signal_upstream_feature	69.2304	34.6152	-16	3UTR	INT_0_4859	sense
+	chrX	617869	617899	+	AACCAATCAATGATATGCGATTGTTTATGA	0	query_pA_signal_upstream_feature	23.3548	11.6774	-20	intergenic_region	INT_0_4922	sense
+	chrX	414916	414946	+	TTTTTACTTGGTATAATTTTCAGGAATTGA	0	query_pA_signal_upstream_feature	5.00461	2.50231	-23	intergenic_region	INT_0_4771	sense
+	chrX	233889	233919	+	TTTATTGCGACATAGGCATACCTTGCCCTC	0	query_pA_signal_upstream_feature	2.37036	45.6671	-15	3UTR	MEF2	sense
+	chrX	355324	355354	+	GAAATCAAAGCATAGTTTACCTTTAATCCC	0	query_pA_signal_upstream_feature	32.947	16.4735	-14	intergenic_region	INT_0_4722	sense
+	chrX	354194	354224	+	TTGAATTTGTATGATGAAACAAAATTTTTT	0	query_pA_signal_upstream_feature	20.0184	10.0092	-27	intergenic_region	INT_0_4721	sense
+	chrII	350777	350807	+	TTTCAAACCACTCAATTTAAAAAATTGTCA	0	query_pA_signal_upstream_feature	12.0945	6.04724	-22	XUTs	XUT_2F-141	sense
+	chrII	347553	347583	+	AATACAATTAATATAAGTGTGGTTATTGAA	0	query_pA_signal_upstream_feature	4.58756	2.29378	-24	intergenic_region	INT_0_456	sense
+	chrII	645117	645147	+	TAAACTTGACATAGAAAATCTTTAAGGTTA	0	query_pA_signal_upstream_feature	83.4102	41.7051	-15	intergenic_region	INT_0_675	sense
-	chrVI	210727	210757	-	GAAATAATGATAAAGGAATCTTTATATAGC	0	query_pA_signal_upstream_feature	82.9931	41.4966	-15	intergenic_region	INT_0_3143	sense
-	chrVI	158027	158057	-	GTTATTATAGTCCTATAGTTCCTGTAACAA	0	query_pA_signal_upstream_feature	27.1083	13.5542	-17	XUTs	INT_0_3106	sense
-	chrVI	205016	205046	-	TGTAAAGTAAACCTGTATCATTTCTGTTTG	0	query_pA_signal_upstream_feature	13.7627	6.88134	-18	intergenic_region	INT_0_3138	sense
-	chrVI	137579	137609	-	GTTTTACGTAGTCTATTCCGTTTTAAGAGT	0	query_pA_signal_upstream_feature	20.8525	10.4263	-13	intergenic_region	INT_0_3095	sense
-	chrVI	191633	191663	-	TTATGTTTACAACAAAATAGTTTACTTCAT	0	query_pA_signal_upstream_feature	13.7627	6.88134	-22	intergenic_region	INT_0_3128	sense
+	chrVI	101326	101356	+	CTCTCCTATATAAATATTTCTGTTTTTCTT	0	query_pA_signal_upstream_feature	11.6774	5.83871	-15	intergenic_region	INT_0_3061	sense
+	chrI	139102	139132	+	AATTTGTATATATATACATCTATCCGAAAA	0	query_pA_signal_upstream_feature	8.34102	4.17051	-21	5UTR	YAL004W	sense
+	chrI	181091	181121	+	TCAGTGTCCAAATAGTTAAAACATTGTGAC	0	query_pA_signal_upstream_feature	22.5207	11.2604	-15	intergenic_region	INT_0_172	sense
+	chrI	166217	166247	+	GCTTCTAAGCACTTACCATTCCTTCATAAG	0	query_pA_signal_upstream_feature	114.689	57.3445	-22	intergenic_region	INT_0_160	sense
-	chrXV	594445	594475	-	TTTTCATTAATAGTATATAACGTGCTGAGT	0	query_pA_signal_upstream_feature	46.7097	23.3548	-14	intergenic_region	INT_0_8031	sense
+	chrXV	340391	340421	-	TTGCTTTTAGTACGTGTATCGATAAATATC	0	query_pA_signal_upstream_feature	6.67281	3.33641	-10	intergenic_region	INT_0_7820	sense
-	chrXV	854279	854309	-	GTCATACTGACATATCTCATTTTGAGATAC	0	query_pA_signal_upstream_feature	12.5115	6.25576	-15	intergenic_region	INT_0_8228	sense
-	chrXV	111053	111083	-	TAATGTTATAGTGATTGAGATCAGTTTCAC	0	query_pA_signal_upstream_feature	20.8525	10.4263	-15	intergenic_region	INT_0_7652	sense
-	chrXV	226701	226731	-	TGTCATACTGAGGTATGCTATCCTGAGATG	0	query_pA_signal_upstream_feature	7.08986	3.54493	-14	intergenic_region	INT_0_7730	sense
+	chrXV	274623	274653	+	TTTTTAAAGTACTGTTGGGGTGCTCTTGCT	0	query_pA_signal_upstream_feature	31.2788	15.6394	-20	intergenic_region	INT_0_7769	sense
+	chrXV	282114	282144	+	TTATATATCGCTTAAATAGAGGAGTGGATG	0	query_pA_signal_upstream_feature	33.7811	16.8906	-16	XUTs	XUT_15F-129	sense
+	chrXV	980633	980663	+	ATAAAATTATAATACTTCATCTTGAACTTT	0	query_pA_signal_upstream_feature	9.59217	4.79609	-17	intergenic_region	INT_0_8311	sense
+	chrXV	464400	464430	+	AATGCAGTGTGATACTCAAGACTAAGTAGT	0	query_pA_signal_upstream_feature	13.3456	6.67281	-15	intergenic_region	INT_0_7934	sense
+	chrXV	288142	288172	+	ATTAATAATATATATAGACATCAATTCTTG	0	query_pA_signal_upstream_feature	20.9616	14.5968	-30	3UTR	TAT2	sense
+	chrXV	571908	571938	+	TCATATGAAACAAGTATTAATAAAAACACC	0	query_pA_signal_upstream_feature	15.4309	7.71544	-23	XUTs	XUT_15F-269	sense
+	chrXV	976371	976401	+	AATCTGGTATTACTCGAGCCCGTAATACAA	0	query_pA_signal_upstream_feature	20.0184	10.0092	-28	intergenic_region	INT_0_8307	sense
+	chrXV	487389	487419	+	TTTATCGTCATAATAAGTTCTTCATTCGTT	0	query_pA_signal_upstream_feature	42.1221	21.0611	-14	intergenic_region	INT_0_7950	sense
-	chrXIV	569960	569990	-	AGTGACGTTGGTTTGGTAGTGTGGAGGGAC	0	query_pA_signal_upstream_feature	135.542	67.7708	-13	intergenic_region	INT_0_7386	sense
+	chrXIV	104755	104785	+	ACTCATTTTGTTAAGTAGCACTTGTATATC	0	query_pA_signal_upstream_feature	13.3456	6.67281	-15	XUTs	XUT_14F-37	sense
+	chrXIV	442956	442986	+	ACGTATCGTTGTCTAGCGATAAATAATGCT	0	query_pA_signal_upstream_feature	57.136	28.568	-16	intergenic_region	INT_0_7287	sense
+	chrXIV	602262	602292	+	GTGACGTTGGTTTGATAGTGTGGAGGGAGG	0	query_pA_signal_upstream_feature	235.217	117.608	-15	antisense_CDS	INT_0_7415	sense
+	chrXIV	632549	632579	+	CGTGTAGATCATGGAAATCGAACCTTTCAC	0	query_pA_signal_upstream_feature	5.00461	2.50231	-23	intergenic_region	INT_0_7441	sense
+	chrXIV	568065	568095	+	ATCCTTTGATAACAATTTCCTGTGAGACAG	0	query_pA_signal_upstream_feature	13.7627	6.88134	-16	intergenic_region	INT_0_7382	sense
-	chrXIII	572975	573005	-	CTTTTATTGAGTATTAAAGCATTTAATGCT	0	query_pA_signal_upstream_feature	22.5207	11.2604	-19	3UTR	INT_0_6709	sense
-	chrXIII	808337	808367	-	AGGTTCCATAAAACCGGAAGTTTTAGTGTA	0	query_pA_signal_upstream_feature	12.9286	6.46429	-16	intergenic_region	INT_0_6882	sense
-	chrXIII	131916	131946	-	ATAACATTTGTATTAGTAATATTTGTTTAC	0	query_pA_signal_upstream_feature	12.9286	6.46429	-16	intergenic_region	INT_0_6363	sense
-	chrXIII	259259	259289	-	ACCAGAAGGAATCACAAGAAAACAGAATAC	0	query_pA_signal_upstream_feature	6.67281	3.33641	-23	XUTs	XUT_13R-110	sense
-	chrXIII	196190	196220	-	ACTTTTACTATTCGGTGATTCCTTAGTGGC	0	query_pA_signal_upstream_feature	17.9332	8.96659	-17	intergenic_region	INT_0_6409	sense
-	chrXIII	321239	321269	-	TATCCTACATTTATGTTTTCTATACTTCTT	0	query_pA_signal_upstream_feature	9.59217	4.79609	-15	intergenic_region	INT_0_6510	sense
-	chrXIII	183988	184018	-	GTTATATATGGTTAGTTAACTCTATGTTCC	0	query_pA_signal_upstream_feature	34.1982	17.0991	-24	intergenic_region	INT_0_6404	sense
-	chrXIII	379428	379458	-	TTTATTGTGGTTATATTGTTATACAGGTGT	0	query_pA_signal_upstream_feature	20.8525	10.4263	-22	intergenic_region	INT_0_6549	sense
-	chrXIII	480713	480743	-	AACCAGCTCAACATATAAGAATACAAGCTG	0	query_pA_signal_upstream_feature	22.1037	11.0518	-16	intergenic_region	INT_0_6629	sense
+	chrXIII	290751	290781	+	ATAACTCGATAAGGAGTTCTCTACGAAAAA	0	query_pA_signal_upstream_feature	4.82866	8.96659	-18	intergenic_region	INT_0_6483	sense
+	chrXIII	363014	363044	+	GGTAAATGTACTGTATAGCCCAGCATGTTT	0	query_pA_signal_upstream_feature	83.4102	41.7051	-13	intergenic_region	INT_0_6541	sense
-	chrIV	488890	488920	-	TTACATTTAATATAGCGATATTGGGATTAA	0	query_pA_signal_upstream_feature	107.599	53.7996	-17	SUTs	XUT_4R-212	sense
-	chrIV	1257099	1257129	-	GTCTCAAGAATTTATATTACCACAAAACCT	0	query_pA_signal_upstream_feature	6.13876	17.0991	-14	intergenic_region	INT_0_1966	sense
-	chrIV	802822	802852	-	TCAAAGTAACTTATAAAAGCCTAAAAAAGG	0	query_pA_signal_upstream_feature	23.3572	21.6866	-22	intergenic_region	INT_0_1645	sense
-	chrIV	1075564	1075594	-	CCACACCTTTATTAGTTCTTTATGAATCCT	0	query_pA_signal_upstream_feature	36.7005	18.3502	-24	intergenic_region	INT_0_1836	sense
-	chrIV	1150961	1150991	-	CATAGTAATGATATAGAAAACTAGAAACAC	0	query_pA_signal_upstream_feature	7.50692	3.75346	-17	antisense_CDS	INT_0_1884	sense
+	chrIV	520922	520952	+	ATGCTTTGTTCAAGAAGGTACGAAAGAAGG	0	query_pA_signal_upstream_feature	84.6613	42.3307	-16	intergenic_region	INT_0_1447	sense
+	chrIV	83498	83528	+	CAGTCTTGTATTAGTTGTTATCCAACGCTC	0	query_pA_signal_upstream_feature	24.189	12.0945	-28	XUTs	XUT_4F-50	sense
+	chrIV	359527	359557	+	TTTAAAATAACATGGACAAATTTATGTCCA	0	query_pA_signal_upstream_feature	52.5484	26.2742	-23	intergenic_region	INT_0_1317	sense
+	chrIV	1201700	1201730	+	AATTATATGTATTATCCCTTTTTAACCTTT	0	query_pA_signal_upstream_feature	8.34102	4.17051	-16	intergenic_region	INT_0_1926	sense
+	chrIV	884311	884341	+	TACTAATTCCAGTATAAATAACAATGTTAT	0	query_pA_signal_upstream_feature	28.7765	14.3883	-27	intergenic_region	INT_0_1697	sense
+	chrIV	992782	992812	+	CATATTGAGGTATGGTATGTCGATGATAAA	0	query_pA_signal_upstream_feature	106.765	53.3825	-16	intergenic_region	INT_0_1774	sense
+	chrIV	410329	410359	+	TAAGTGCAAACATGTAAGAAAGATTCTCGG	0	query_pA_signal_upstream_feature	6.67281	3.33641	-14	intergenic_region	INT_0_1362	sense
-	chrVIII	475798	475828	-	ATAATAATACGATGTTTAGTAAAGCAGAAA	0	query_pA_signal_upstream_feature	2.8584	7.29839	-13	intergenic_region	INT_0_4395	sense
-	chrXVI	56294	56324	-	TGTCATACTGACGTATCCCATTTTGAGATA	0	query_pA_signal_upstream_feature	75.9033	37.9516	-13	intergenic_region	INT_0_8436	sense
-	chrXVI	775856	775886	-	GATATTGAGATATAACATTCTAGGATAATC	0	query_pA_signal_upstream_feature	18.7673	9.38364	-14	intergenic_region	INT_0_8986	sense
-	chrXVI	338939	338969	-	AAATATTTTGGTGAATTTGCTCGGTACGCG	0	query_pA_signal_upstream_feature	56.7189	28.3595	-12	XUTs	XUT_16R-143	sense
-	chrXVI	622651	622681	-	CTTGGACCATTTATAAAGCACAAGAATGCT	0	query_pA_signal_upstream_feature	74.2351	37.1175	-19	CUTs	INT_0_8863	sense
+	chrXVI	810626	810656	+	TGATTCAGATGTGGAAGCGGTTTTAAAGTC	0	query_pA_signal_upstream_feature	102.177	51.0887	-19	intergenic_region	INT_0_9016	sense
+	chrXVI	744234	744264	+	TCCATGCAGACACTTTGTCCCTTCTTGGAG	0	query_pA_signal_upstream_feature	5.83871	2.91936	-17	CDS	YPR108W-A	sense
+	chrXVI	582012	582042	+	CAAATATTCGTTAGATAAAGATGTTTCGGT	0	query_pA_signal_upstream_feature	37.9516	18.9758	-19	CUTs	XUT_16F-233	sense
+	chrXVI	860329	860359	+	AATGGAACACCTACCATCAATAGAAGTACC	0	query_pA_signal_upstream_feature	14.5968	7.29839	-30	intergenic_region	INT_0_9051	sense
-	chrIII	123668	123698	-	GGGCTGTATCCCAGACTTCAGGCGCTGTTC	0	query_pA_signal_upstream_feature	16.265	8.13249	-10	intergenic_region	INT_0_905	sense
-	chrIII	142791	142821	-	CCGTATACATAATATTGTTGCTTTTCTCGA	0	query_pA_signal_upstream_feature	7.08986	3.54493	-15	snoRNA_300_nt_upstream	INT_0_922	sense
-	chrIII	82553	82583	-	TTATACACCATTAGTTCATCTTTTTATTAA	0	query_pA_signal_upstream_feature	158.479	79.2397	-13	intergenic_region	INT_0_867	sense
+	chrIII	127666	127696	+	CAACATATATTAGTAATACTTTTTCTGTAA	0	query_pA_signal_upstream_feature	32.1129	16.0565	-16	intergenic_region	INT_0_908	sense
+	chrIII	90809	90839	+	AAACGTTATATTTATAGGATAATTATACTC	0	query_pA_signal_upstream_feature	7.50692	3.75346	-25	intergenic_region	INT_0_869	sense
-	chrVII	857511	857541	-	ATCAGATGAGGTAACATTACTTGTACCGCG	0	query_pA_signal_upstream_feature	34.6152	17.3076	-19	intergenic_region	INT_0_3853	sense
-	chrVII	931043	931073	-	GAAGATAAAACTTATTCAGATCTCTTCAAC	0	query_pA_signal_upstream_feature	22.5207	11.2604	-15	intergenic_region	INT_0_3909	sense
-	chrVII	412387	412417	-	TTAGTGGACTCTCATAGGACTCTTGTCCCT	0	query_pA_signal_upstream_feature	35.8664	17.9332	-27	intergenic_region	INT_0_3496	sense
-	chrVII	287475	287505	-	ACAGCTTTCGGGGAGACAAGTAAGAATTTA	0	query_pA_signal_upstream_feature	64.2258	32.1129	-10	intergenic_region	INT_0_3395	sense
-	chrVII	544668	544698	-	TTCATAACTAAAATAGTATGCTATAAGAGT	0	query_pA_signal_upstream_feature	218.952	109.476	-13	intergenic_region	INT_0_3601	sense
-	chrVII	73922	73952	-	TAAACTATGAAGCAAGTATCTTATCTTGGG	0	query_pA_signal_upstream_feature	112.187	56.0933	-17	intergenic_region	INT_0_3244	sense
-	chrVII	185806	185836	-	TATTTTTGATACATATAATAATTTTGAAGC	0	query_pA_signal_upstream_feature	11.2604	5.63019	-18	intergenic_region	INT_0_3325	sense
-	chrVII	701068	701098	-	TTACTAGATAGCAAGTACAAGAGAGTACTA	0	query_pA_signal_upstream_feature	11.6774	5.83871	-14	XUTs	XUT_7R-315	sense
-	chrVII	878835	878865	-	ACAGAATTTCGGCAGACAAGTAAAATGTTA	0	query_pA_signal_upstream_feature	81.742	40.871	-9	3UTR	YGR190C	sense
+	chrVII	731087	731117	+	ATGTTGAGGACTAAGAGAGCCTATATTTTC	0	query_pA_signal_upstream_feature	20.0184	10.0092	-16	intergenic_region	INT_0_3741	sense
+	chrVII	1004166	1004196	+	ATCTTGTTCGATAAAACAACATCACTTTTT	0	query_pA_signal_upstream_feature	2.50231	1.25115	-18	intergenic_region	INT_0_3962	sense
+	chrVII	794367	794397	+	ATATTTTTTATACGTAACGCAGCATCTACC	0	query_pA_signal_upstream_feature	45.0415	22.5207	-16	intergenic_region	INT_0_3801	sense
+	chrVII	423042	423072	+	CTAATAATAACTAATAGTTGCTATAGTCAC	0	query_pA_signal_upstream_feature	4.58756	2.29378	-18	intergenic_region	INT_0_3508	sense
+	chrVII	541800	541830	+	AAACATTGCTATTTAGCTATTTGAAGCCAG	0	query_pA_signal_upstream_feature	5.42166	2.71083	-20	intergenic_region	INT_0_3596	sense
+	chrVII	319731	319761	+	ATACTGACATATCTCATTTTGAGATACAAC	0	query_pA_signal_upstream_feature	26.6913	13.3456	-18	intergenic_region	INT_0_3419	sense
+	chrVII	122219	122249	+	ACATCGTGAGCTATGTTTCCCTGAAATGGG	0	query_pA_signal_upstream_feature	4.58756	2.29378	-16	intergenic_region	INT_0_3280	sense
+	chrVII	115438	115468	+	ATAATGTATATTTAACTAAAACTATTATCG	0	query_pA_signal_upstream_feature	24.606	12.303	-22	intergenic_region	INT_0_3273	sense
+	chrVII	876344	876374	+	TCTTAATTACATATTAAACCTGAGAGGTCA	0	query_pA_signal_upstream_feature	6.67281	3.33641	-17	intergenic_region	INT_0_3861	sense
+	chrVII	700625	700655	+	TCCTTTTATAAATTGCGTTTGCTTTATTCC	0	query_pA_signal_upstream_feature	193.095	96.5473	-18	CUTs	CUT153	sense
-	chrXI	46826	46856	-	TCTGTAAAGTATAGCGGAGCCACAAATTTA	0	query_pA_signal_upstream_feature	5.83871	2.91936	-21	intergenic_region	INT_0_5046	sense
-	chrXI	513423	513453	-	GACGAAATATAAATATTTAAAACTAAGAGA	0	query_pA_signal_upstream_feature	20.4055	33.1555	-14	XUTs	INT_0_5392	sense
-	chrXI	313492	313522	-	TATTTATTCAACCAGATGTGCAGATGTAAC	0	query_pA_signal_upstream_feature	7.50692	3.75346	-23	intergenic_region	INT_0_5245	sense
+	chrXI	308237	308267	-	TTGCTGCACTATAGATATGACTTTAGATGT	0	query_pA_signal_upstream_feature	4.17051	2.08525	-9	intergenic_region	INT_0_5238	sense
+	chrXI	74574	74604	+	TCAAGCATTATTTATATATCTTGTTTTCAA	0	query_pA_signal_upstream_feature	9.59217	4.79609	-26	XUTs	XUT_11F-27	sense
+	chrXI	578915	578945	+	ATTTCGCCTTTATTAGTTATTTATATGAGT	0	query_pA_signal_upstream_feature	27.9424	13.9712	-14	XUTs	XUT_11F-252	sense
+	chrXI	517938	517968	+	TAAAAATATATGATCCAATTCCTAGGACAT	0	query_pA_signal_upstream_feature	12.5115	6.25576	-17	CUTs	CUT243	sense
+	chrXI	219845	219875	+	AAAAGAGCTTGTTATAGTAATCTAAGTGGA	0	query_pA_signal_upstream_feature	27.1083	13.5542	-17	intergenic_region	INT_0_5168	sense
+	chrXI	490918	490948	+	GTGCTGATACTTAGGGTTCTCAATTTTTAA	0	query_pA_signal_upstream_feature	3.75346	1.87673	-22	intergenic_region	INT_0_5376	sense
-	chrV	443295	443325	-	CTTCCATGGTTTGTTACCTTCTTTCCAGTA	0	query_pA_signal_upstream_feature	10.4263	5.21314	-15	intergenic_region	INT_0_2899	sense
-	chrV	551378	551408	-	TGAAACGTTGCTATGATTTCATAATTTATG	0	query_pA_signal_upstream_feature	29.6106	14.8053	-20	3UTR	INT_0_2977	sense
-	chrV	288544	288574	-	TTTTTATATGTCTCTGATAGTGGTTCTTTT	0	query_pA_signal_upstream_feature	194.346	97.1729	-9	intergenic_region	INT_0_2770	sense
-	chrV	131173	131203	-	AGAATAGTGTTGATATATGATAAAATTATT	0	query_pA_signal_upstream_feature	39.2028	19.6014	-15	intergenic_region	INT_0_2631	sense
-	chrV	312115	312145	-	TGCTTATACGGAGGTACCCCGTGTTGAGAT	0	query_pA_signal_upstream_feature	7.50692	3.75346	-29	intergenic_region	INT_0_2793	sense
+	chrV	469407	469437	+	CCTTCTACAAGGTATTTGTTTCTTAAATGT	0	query_pA_signal_upstream_feature	7.50692	3.75346	-21	intergenic_region	INT_0_2920	sense
+	chrV	250236	250266	+	GTCATACTGACGTATCTCATTTTGAGATAC	0	query_pA_signal_upstream_feature	54.6337	27.3168	-14	intergenic_region	INT_0_2733	sense
+	chrV	100083	100113	+	TTATTGTGTTAATAAATAAAGTTAACATCC	0	query_pA_signal_upstream_feature	35.8664	17.9332	-16	intergenic_region	INT_0_2606	sense
+	chrV	438650	438680	+	AGAATTGTAGATATATTCTATTTTTTAATG	0	query_pA_signal_upstream_feature	27.1083	13.5542	-21	intergenic_region	INT_0_2893	sense
-	chrXII	1052164	1052194	-	ATACTACAGGTTATGGTTTTCGTGTGACCT	0	query_pA_signal_upstream_feature	14.1797	7.08986	-13	intergenic_region	INT_0_6251	sense
-	chrXII	963075	963105	-	AAACTGGATGGTGTTCGTATCCTGTATTTC	0	query_pA_signal_upstream_feature	17.8548	33.1555	-16	CUTs	INT_0_6201	sense
-	chrXII	605452	605482	-	CAATCATCTACGGTATAAATAACAATTTAA	0	query_pA_signal_upstream_feature	5.83871	2.91936	-14	intergenic_region	INT_0_5925	sense
-	chrXII	448741	448771	-	AAAGAAGAGAACGTCAACAATTTTAATCGT	0	query_pA_signal_upstream_feature	13.7627	6.88134	-19	intergenic_region	INT_0_5812	sense
+	chrXII	875326	875356	+	TGCAGTTTGATGGGTTGTCTATCTTAGACT	0	query_pA_signal_upstream_feature	53.7996	26.8998	-18	XUTs	XUT_12F-347	sense
+	chrXII	797128	797158	+	AACATTTGGTAAGGTATGAAATAAAATGCG	0	query_pA_signal_upstream_feature	35.0323	17.5161	-18	intergenic_region	INT_0_6075	sense
+	chrXII	818559	818589	+	GGTCAGATGAATAAAGAGCAGGAATTTACT	0	query_pA_signal_upstream_feature	18.3502	9.17512	-22	intergenic_region	INT_0_6092	sense
+	chrXII	784304	784334	+	CACAAAATTTGGACAATATAACGATTCATT	0	query_pA_signal_upstream_feature	5.00461	2.50231	-13	intergenic_region	INT_0_6063	sense
+	chrXII	374305	374335	+	CACTCCGGTATTACTCGAGCCCGTAATAAA	0	query_pA_signal_upstream_feature	6.25576	3.12788	-19	intergenic_region	INT_0_5752	sense
+	chrXII	734752	734782	+	TTTAATATGTCCTATAAGATGTTAACTTGC	0	query_pA_signal_upstream_feature	19.1843	9.59217	-26	intergenic_region	INT_0_6035	sense
+	chrXII	793868	793898	+	ACCTTACTATGAATTGCGTTTTGACACAGG	0	query_pA_signal_upstream_feature	4.71637	4.37903	-20	intergenic_region	INT_0_6074	sense
+	chrXII	628333	628363	+	AAACATTCATTAAAAGGTTCTTTTCGTATA	0	query_pA_signal_upstream_feature	101.343	50.6717	-23	3UTR	ERF2	sense

## Sheet: Reb1p_roadblock_sites
cluster peak strand	cluster peak chromosome	motif start	motif end	motif_strand	motif_sequence	mismatches from consensus	category	criteria for calling site	total cluster signal	distance from motif boundary to cluster peak (bp)	type of region	gene name	gene strand
+	chrVII	609907	609914	+	TTACCCG	0	query_pA_signal_upstream_feature	946.867	1098.93	-15	snoRNA_300_nt_downstream	CUT150	sense
+	chrXV	234603	234610	+	TTACCCT	1	query_pA_signal_upstream_feature	833.268	416.634	-15	snoRNA_300_nt_downstream	INT_0_7741	sense
-	chrII	307076	307083	+	TTACCCG	0	query_pA_signal_upstream_feature	704.399	352.199	-17	snoRNA_300_nt_downstream	CUT447	sense
+	chrXVI	822162	822169	-	TTGCACG	2	query_pA_signal_upstream_feature	652.685	326.342	-16	snoRNA_300_nt_downstream	CUT433	sense
+	chrXIV	500688	500695	+	TTACCCG	0	query_pA_signal_upstream_feature	492.12	246.06	-18	CUTs	CUT337	sense
+	chrXV	832624	832631	+	TTACCCG	0	query_pA_signal_upstream_feature	353.952	1232.39	-12	snoRNA_300_nt_downstream	INT_0_8205	sense
+	chrVII	347056	347063	+	TTACCCT	1	query_pA_signal_upstream_feature	265.661	132.831	-16	intergenic_region	INT_0_3439	sense
-	chrXIII	67674	67681	+	TTACCCG	0	query_pA_signal_upstream_feature	252.823	410.795	-16	snoRNA_300_nt_downstream	INT_0_6315	sense
-	chrV	51712	51719	-	TTACCCG	0	query_pA_signal_upstream_feature	237.302	118.651	-16	CUTs	INT_0_2564	sense
+	chrVII	609944	609951	-	TTAAACG	2	query_pA_signal_upstream_feature	218.952	109.476	-17	snoRNA_300_nt_downstream	CUT150	sense
-	chrXVI	900033	900040	-	TTACCCG	0	query_pA_signal_upstream_feature	212.696	106.348	-17	CUTs	INT_0_9089	sense
-	chrXI	245784	245791	+	TTACCCG	0	query_pA_signal_upstream_feature	203.521	101.76	-16	intergenic_region	INT_0_5187	sense
+	chrXII	501188	501195	+	TTACCCG	0	query_pA_signal_upstream_feature	201.853	100.926	-16	3UTR	DPH5	antisense
+	chrXV	316331	316338	-	TTACCCG	0	query_pA_signal_upstream_feature	160.148	80.0738	-22	CUTs	CUT368	sense
-	chrX	116047	116054	+	TTACCAA	2	query_pA_signal_upstream_feature	143.466	71.7328	-21	intergenic_region	INT_0_4545	sense
-	chrXI	514033	514040	+	TTGCCCG	1	query_pA_signal_upstream_feature	105.514	52.7569	-17	SUTs	XUT_11R-223	sense
-	chrVII	739294	739301	+	TTGCACG	2	query_pA_signal_upstream_feature	103.846	51.9228	-26	CUTs	CUT617	sense
-	chrVI	251948	251955	-	TTACCCG	0	query_pA_signal_upstream_feature	81.742	40.871	-16	CUTs	CUT580	sense
+	chrXIII	510499	510506	-	TTACCCG	0	query_pA_signal_upstream_feature	78.8226	39.4113	-19	intergenic_region	INT_0_6653	sense
+	chrXI	329593	329600	+	TTACCCG	0	query_pA_signal_upstream_feature	75.4862	37.7431	-15	intergenic_region	INT_0_5260	sense
-	chrIV	524880	524887	+	TGACCCG	1	query_pA_signal_upstream_feature	68.3963	34.1982	-16	5UTR	EHD3	sense
+	chrXIV	662526	662533	+	TTACCCG	0	query_pA_signal_upstream_feature	67.9793	33.9896	-15	5UTR	XUT_14F-269	sense
+	chrIV	148065	148072	+	TTACCCT	1	query_pA_signal_upstream_feature	67.5622	33.7811	-16	intergenic_region	INT_0_1159	sense
-	chrXIII	586473	586480	-	TCACCCC	2	query_pA_signal_upstream_feature	66.7281	33.3641	-6	5UTR	INP2	sense
-	chrIII	228040	228047	-	TTAAACG	2	query_pA_signal_upstream_feature	66.3111	33.1555	-28	3UTR	INT_0_996	sense
+	chrXVI	75462	75469	+	TTACCCG	0	query_pA_signal_upstream_feature	65.0599	32.53	-15	SUTs	XUT_16F-27	sense
+	chrVII	284290	284297	-	TTACCCG	0	query_pA_signal_upstream_feature	64.6429	32.3214	-19	5UTR	INT_0_3390	sense
+	chrXIII	298728	298735	+	TTACATG	2	query_pA_signal_upstream_feature	62.8849	102.177	-21	snoRNA_300_nt_downstream	YMR013W-A	sense
-	chrX	434807	434814	+	TTACCCT	1	query_pA_signal_upstream_feature	58.3871	29.1936	-16	SUTs	SUT636	sense
+	chrIII	179306	179313	-	TTACCCG	0	query_pA_signal_upstream_feature	56.7189	28.3595	-21	CUTs	CUT048	sense
-	chrVII	144237	144244	+	TTACCCG	0	query_pA_signal_upstream_feature	54.6337	27.3168	-17	intergenic_region	INT_0_3291	sense
+	chrI	166229	166236	+	TTACCAT	2	query_pA_signal_upstream_feature	52.9655	26.4827	-29	intergenic_region	INT_0_160	sense
-	chrVII	123479	123486	+	TTACCCG	0	query_pA_signal_upstream_feature	50.4632	25.2316	-28	3UTR	INT_0_3282	sense
+	chrXII	840142	840149	-	TTACCCG	0	query_pA_signal_upstream_feature	50.0461	25.0231	-26	CUTs	CUT273	sense
+	chrXII	818831	818838	+	TTTCCCT	2	query_pA_signal_upstream_feature	49.6291	24.8145	-10	intergenic_region	INT_0_6094	sense
-	chrII	340868	340875	-	TTACCCG	0	query_pA_signal_upstream_feature	49.6291	24.8145	-14	CUTs	CUT448	sense
-	chrXVI	105616	105623	-	TTACCCG	0	query_pA_signal_upstream_feature	46.7097	23.3548	-19	CUTs	CUT879	sense
+	chrVII	794374	794381	+	TTATACG	2	query_pA_signal_upstream_feature	43.7903	21.8952	-23	intergenic_region	INT_0_3801	sense
-	chrX	223636	223643	+	TTACCCG	0	query_pA_signal_upstream_feature	43.3733	21.6866	-25	intergenic_region	INT_0_4631	sense
+	chrXIII	653456	653463	+	TTACCCC	1	query_pA_signal_upstream_feature	41.288	20.644	-20	SUTs	XUT_13F-286	sense
-	chrXII	87209	87216	-	TTACTCT	2	query_pA_signal_upstream_feature	40.871	20.4355	-9	intergenic_region	INT_0_5555	sense
+	chrXV	949648	949655	+	TTACCCG	0	query_pA_signal_upstream_feature	39.2028	19.6014	-14	intergenic_region	INT_0_8290	sense
+	chrXI	365177	365184	+	TAATCCG	2	query_pA_signal_upstream_feature	38.7857	19.3929	-18	snoRNA_300_nt_downstream	INT_0_5290	sense
+	chrIV	302832	302839	-	TTACCCG	0	query_pA_signal_upstream_feature	38.3687	19.1843	-18	intergenic_region	INT_0_1273	sense
+	chrXII	198626	198633	+	TTACCCT	1	query_pA_signal_upstream_feature	37.9516	18.9758	-17	snoRNA_300_nt_upstream	INT_0_5629	sense
+	chrIV	1289265	1289272	+	TTCACCG	2	query_pA_signal_upstream_feature	37.9516	18.9758	-23	intergenic_region	XUT_4F-592	sense
-	chrX	79576	79583	+	TCACCCG	1	query_pA_signal_upstream_feature	37.9516	18.9758	-16	5UTR	SWE1	sense
+	chrX	137237	137244	+	TTACCCT	1	query_pA_signal_upstream_feature	35.8664	17.9332	-18	CDS	YJL150W	sense
-	chrXIV	110722	110729	-	TTACCCG	0	query_pA_signal_upstream_feature	35.8664	17.9332	-15	XUTs	XUT_14R-40	sense
+	chrII	605913	605920	+	TTACACC	2	query_pA_signal_upstream_feature	35.4493	17.7247	-13	intergenic_region	INT_0_646	sense
-	chrVII	287482	287489	+	TTACTTG	2	query_pA_signal_upstream_feature	35.0323	17.5161	-26	intergenic_region	INT_0_3395	sense
+	chrXII	797133	797140	-	TTACCAA	2	query_pA_signal_upstream_feature	34.6152	17.3076	-23	intergenic_region	INT_0_6075	sense
-	chrXV	820316	820323	+	TTACCCG	0	query_pA_signal_upstream_feature	34.6152	17.3076	-16	intergenic_region	INT_0_8195	sense
-	chrXIII	628045	628052	+	GTACCCG	1	query_pA_signal_upstream_feature	34.1982	17.0991	-17	intergenic_region	INT_0_6753	sense
+	chrXV	282122	282129	-	TTAAGCG	2	query_pA_signal_upstream_feature	33.7811	16.8906	-24	XUTs	XUT_15F-129	sense
-	chrVII	878842	878849	+	TTACTTG	2	query_pA_signal_upstream_feature	33.3641	16.682	-25	3UTR	YGR190C	sense
-	chrIV	769357	769364	-	TTACCCG	0	query_pA_signal_upstream_feature	32.53	16.265	-18	intergenic_region	INT_0_1623	sense
-	chrIV	215864	215871	+	TTACCCG	0	query_pA_signal_upstream_feature	32.1129	16.0565	-20	CUTs	XUT_4R-81	sense
+	chrXIII	30385	30392	+	TTAACCG	1	query_pA_signal_upstream_feature	30.8618	15.4309	-21	5UTR	SUT286	sense
+	chrXV	544847	544854	+	TTACCCG	0	query_pA_signal_upstream_feature	30.5441	28.3595	-12	intergenic_region	INT_0_7989	sense
+	chrXV	464582	464589	-	TTACCCG	0	query_pA_signal_upstream_feature	30.4447	15.2224	-28	tRNA_100_nt_downstream	YOR072W-B	sense
+	chrIV	167598	167605	-	TTACCCG	0	query_pA_signal_upstream_feature	28.7765	14.3883	-18	5UTR	INT_0_1173	sense
-	chrX	434795	434802	+	TTACGCG	1	query_pA_signal_upstream_feature	28.3595	14.1797	-28	SUTs	SUT636	sense
+	chrXIII	626095	626102	-	TTACCCG	0	query_pA_signal_upstream_feature	28.3595	14.1797	-24	snoRNA_300_nt_upstream	YMR182W-A	sense
-	chrIX	380962	380969	-	TTACCCG	0	query_pA_signal_upstream_feature	27.5254	13.7627	-23	5UTR	GAT4	sense
+	chrVII	767337	767344	+	TTACCCC	1	query_pA_signal_upstream_feature	26.6913	13.3456	-17	intergenic_region	INT_0_3779	sense
-	chrV	178215	178222	+	TTACCCT	1	query_pA_signal_upstream_feature	25.8572	12.9286	-15	CUTs	CUT550	sense
-	chrXI	468874	468881	-	TTACCCG	0	query_pA_signal_upstream_feature	25.4401	12.7201	-19	intergenic_region	INT_0_5362	sense
-	chrXV	267674	267681	+	TTACCCG	0	query_pA_signal_upstream_feature	25.0231	12.5115	-18	5UTR	SIL1	sense
+	chrXI	71047	71054	-	GTACCCG	1	query_pA_signal_upstream_feature	24.606	12.303	-17	antisense_CDS	INT_0_5057	sense
-	chrIV	751094	751101	+	TTGCCCG	1	query_pA_signal_upstream_feature	24.189	12.0945	-18	CUTs	CUT508	sense
+	chrXIV	547391	547398	+	CTTCCCG	2	query_pA_signal_upstream_feature	24.189	12.0945	-24	CDS	YNL042W-B	sense
-	chrXVI	643644	643651	+	TTACCCT	1	query_pA_signal_upstream_feature	23.3548	11.6774	-18	SUTs	SUT829	sense
-	chrVII	374954	374961	+	TTACCCG	0	query_pA_signal_upstream_feature	22.9378	11.4689	-16	intergenic_region	INT_0_3463	sense
+	chrV	287383	287390	-	TAACCCG	1	query_pA_signal_upstream_feature	22.9378	11.4689	-24	SUTs	XUT_5F-139	sense
-	chrV	221710	221717	-	ACACCCG	2	query_pA_signal_upstream_feature	22.9378	11.4689	-21	intergenic_region	INT_0_2710	sense
-	chrXIV	647051	647058	-	TTACCCG	0	query_pA_signal_upstream_feature	22.5207	11.2604	-11	5UTR	PRP2	sense
-	chrXV	421792	421799	+	TTACCCG	0	query_pA_signal_upstream_feature	22.1037	11.0518	-16	intergenic_region	INT_0_7897	sense
-	chrXV	769525	769532	-	TTACCCG	0	query_pA_signal_upstream_feature	21.6866	10.8433	-14	CUTs	INT_0_8152	sense
+	chrII	164996	165003	+	TTACCCG	0	query_pA_signal_upstream_feature	21.2696	10.6348	-20	SUTs	SUT006	sense
-	chrIV	1359038	1359045	+	ATACCCG	1	query_pA_signal_upstream_feature	21.2696	10.6348	-16	intergenic_region	INT_0_2041	sense
+	chrIX	151464	151471	-	TTACCCG	0	query_pA_signal_upstream_feature	20.8525	10.4263	-19	3UTR	SDP1	sense
-	chrVI	130042	130049	-	TTACCCG	0	query_pA_signal_upstream_feature	20.8525	10.4263	-20	XUTs	XUT_6R-53	sense
-	chrXII	877546	877553	-	TTACCCG	0	query_pA_signal_upstream_feature	20.8525	10.4263	-14	intergenic_region	INT_0_6145	sense
-	chrVII	641881	641888	-	TTACCCT	1	query_pA_signal_upstream_feature	20.8525	10.4263	-11	intergenic_region	INT_0_3675	sense
-	chrXII	196680	196687	+	CTACCCG	1	query_pA_signal_upstream_feature	20.3627	14.1797	-19	3UTR	AAT2	sense
+	chrX	467143	467150	-	TTTCACG	2	query_pA_signal_upstream_feature	20.0184	10.0092	-27	CDS	YJR018W	sense
-	chrV	281493	281500	+	TTACCCG	0	query_pA_signal_upstream_feature	19.6014	9.8007	-20	CUTs	INT_0_2762	sense
+	chrXII	912446	912453	-	TCACACG	2	query_pA_signal_upstream_feature	19.6014	9.8007	-14	CUTs	CUT276	sense
-	chrXV	611864	611871	+	TTACCCG	0	query_pA_signal_upstream_feature	19.1843	9.59217	-17	intergenic_region	INT_0_8040	sense
+	chrXII	450394	450401	+	TTCCGCG	2	query_pA_signal_upstream_feature	19.1843	9.59217	-13	SUTs	SUT264	sense
+	chrV	546658	546665	-	TTACCCG	0	query_pA_signal_upstream_feature	19.1649	26.6913	-23	3UTR	INT_0_2971	sense
-	chrXVI	614663	614670	+	TTACCCG	0	query_pA_signal_upstream_feature	18.7673	9.38364	-16	5UTR	SUT826	sense
+	chrXIII	253546	253553	-	TTACCCG	0	query_pA_signal_upstream_feature	18.7673	9.38364	-25	5UTR	SUT296	sense
-	chrXVI	482125	482132	+	TTACCCT	1	query_pA_signal_upstream_feature	17.9332	8.96659	-16	SUTs	SUT818	sense
+	chrV	484660	484667	+	TTACCCT	1	query_pA_signal_upstream_feature	17.9332	8.96659	-18	intergenic_region	INT_0_2930	sense
-	chrXII	948241	948248	-	TTACCCG	0	query_pA_signal_upstream_feature	17.9332	8.96659	-15	intergenic_region	INT_0_6189	sense
-	chrXIV	726027	726034	-	ATACCTG	2	query_pA_signal_upstream_feature	17.9332	8.96659	-9	tRNA_100_nt_downstream	INT_0_7510	sense
+	chrXIV	568063	568070	+	TTATCCT	2	query_pA_signal_upstream_feature	17.0991	8.54954	-14	intergenic_region	INT_0_7382	sense
-	chrIII	123971	123978	-	TTACCCG	0	query_pA_signal_upstream_feature	17.0991	8.54954	-17	intergenic_region	INT_0_905	sense
+	chrV	422635	422642	-	TTGCCCG	1	query_pA_signal_upstream_feature	17.0991	8.54954	-18	CUTs	CUT116	sense
-	chrXV	912637	912644	+	TTACCCT	1	query_pA_signal_upstream_feature	17.0991	8.54954	-19	intergenic_region	INT_0_8269	sense
+	chrXIII	349991	349998	+	TTACCCG	0	query_pA_signal_upstream_feature	16.682	8.34102	-29	intergenic_region	INT_0_6530	sense
-	chrIX	113626	113633	-	TTACCCG	0	query_pA_signal_upstream_feature	16.682	8.34102	-15	intergenic_region	INT_0_2257	sense
+	chrVIII	187800	187807	-	TTACCCT	1	query_pA_signal_upstream_feature	16.265	8.13249	-21	5UTR	INT_0_4163	sense
-	chrV	342718	342725	+	TTACCCG	0	query_pA_signal_upstream_feature	16.265	8.13249	-18	intergenic_region	INT_0_2823	sense
+	chrVIII	272525	272532	-	TTACCCT	1	query_pA_signal_upstream_feature	15.8709	11.0518	-21	SUTs	SUT161	sense
+	chrVI	90842	90849	-	TTACCCG	0	query_pA_signal_upstream_feature	15.8479	7.92397	-19	intergenic_region	SUT103	sense
+	chrXIII	502019	502026	-	TTACCCG	0	query_pA_signal_upstream_feature	15.8479	7.92397	-17	intergenic_region	INT_0_6645	sense
+	chrXII	993028	993035	+	TAACCCT	2	query_pA_signal_upstream_feature	15.272	14.1797	-23	3UTR	INT_0_6215	sense
-	chrIX	160569	160576	+	TTACCCG	0	query_pA_signal_upstream_feature	15.0138	7.50692	-19	intergenic_region	INT_0_2290	sense
+	chrXIII	897746	897753	-	TTACCCG	0	query_pA_signal_upstream_feature	15.0138	7.50692	-18	intergenic_region	INT_0_6941	sense
+	chrXII	722384	722391	-	GTACCAG	2	query_pA_signal_upstream_feature	14.5968	7.29839	-17	CUTs	CUT270	sense
+	chrXV	316565	316572	+	TTACCCG	0	query_pA_signal_upstream_feature	14.5968	7.29839	-17	CUTs	CUT368	sense
+	chrX	585926	585933	+	TTACCCG	0	query_pA_signal_upstream_feature	14.5534	16.8906	-15	CUTs	CUT217	sense
+	chrXII	40552	40559	+	TTACCCG	0	query_pA_signal_upstream_feature	14.1797	7.08986	-19	intergenic_region	INT_0_5527	sense
+	chrVIII	187789	187796	+	ATACCCA	2	query_pA_signal_upstream_feature	14.1797	7.08986	-10	5UTR	INT_0_4163	sense
+	chrIV	1120365	1120372	+	TTACCCG	0	query_pA_signal_upstream_feature	14.1797	7.08986	-12	3UTR	INT_0_1864	antisense
-	chrIV	555364	555371	-	TTTCGCG	2	query_pA_signal_upstream_feature	13.7627	6.88134	-14	5UTR	YDR048C	sense
+	chrV	178680	178687	+	TTACCCG	0	query_pA_signal_upstream_feature	13.7627	6.88134	-23	3UTR	INT_0_2675	sense
+	chrIV	229644	229651	+	TTACACA	2	query_pA_signal_upstream_feature	13.7627	6.88134	-28	3UTR	STF1	sense
-	chrVII	800270	800277	+	TTACCCG	0	query_pA_signal_upstream_feature	13.7627	6.88134	-25	intergenic_region	INT_0_3807	sense
+	chrVIII	39923	39930	+	TTACCCG	0	query_pA_signal_upstream_feature	13.3456	6.67281	-15	intergenic_region	INT_0_4048	sense
+	chrX	339482	339489	+	TTACCCT	1	query_pA_signal_upstream_feature	13.3456	6.67281	-9	3UTR	INT_0_4711	sense
-	chrXV	767795	767802	-	TTAGCCC	2	query_pA_signal_upstream_feature	13.3456	6.67281	-17	5UTR	YOR228C	sense
+	chrIV	1059462	1059469	+	TTACCCG	0	query_pA_signal_upstream_feature	13.3456	6.67281	-20	intergenic_region	INT_0_1824	sense
-	chrXI	98200	98207	-	TTTCCCA	2	query_pA_signal_upstream_feature	13.3456	6.67281	-18	intergenic_region	INT_0_5077	sense
+	chrXIV	479351	479358	+	TTACCCG	0	query_pA_signal_upstream_feature	12.9286	6.46429	-15	intergenic_region	INT_0_7311	sense
+	chrX	146952	146959	-	TTACCCA	1	query_pA_signal_upstream_feature	12.8764	8.96659	-21	3UTR	INT_0_4579	sense
+	chrXVI	730365	730372	+	TTACCCG	0	query_pA_signal_upstream_feature	12.577	14.5968	-16	3UTR	MRPL51	sense
+	chrVII	787096	787103	-	TTACCCG	0	query_pA_signal_upstream_feature	12.5115	6.25576	-17	intergenic_region	INT_0_3796	sense
-	chrX	525900	525907	-	TTACCCT	1	query_pA_signal_upstream_feature	12.5115	6.25576	-15	SUTs	INT_0_4852	sense
+	chrXII	371307	371314	+	TTACCCT	1	query_pA_signal_upstream_feature	12.5115	6.25576	-16	3UTR	YLR112W	sense
+	chrXI	517934	517941	-	TTACAAG	2	query_pA_signal_upstream_feature	12.5115	6.25576	-13	CUTs	CUT243	sense
-	chrXII	1052181	1052188	+	TAACCTG	2	query_pA_signal_upstream_feature	12.5115	6.25576	-19	intergenic_region	INT_0_6251	sense
-	chrIV	442472	442479	-	TTACCCG	0	query_pA_signal_upstream_feature	12.5115	6.25576	-13	intergenic_region	INT_0_1392	sense
-	chrXVI	696971	696978	-	TTACCCT	1	query_pA_signal_upstream_feature	12.0945	6.04724	-14	intergenic_region	INT_0_8928	sense
-	chrXII	669059	669066	+	TTACCCG	0	query_pA_signal_upstream_feature	12.0945	6.04724	-20	intergenic_region	INT_0_5975	sense
-	chrVII	701091	701098	-	TTACTAG	2	query_pA_signal_upstream_feature	11.6774	5.83871	-14	XUTs	XUT_7R-315	sense
-	chrXIII	832113	832120	-	TTACCCG	0	query_pA_signal_upstream_feature	11.6774	5.83871	-16	intergenic_region	INT_0_6897	sense
+	chrVII	584683	584690	+	TTACCCG	0	query_pA_signal_upstream_feature	11.6774	5.83871	-16	intergenic_region	INT_0_3628	sense
-	chrIV	125286	125293	-	TGACCGG	2	query_pA_signal_upstream_feature	11.2604	5.63019	-26	3UTR	INT_0_1140	sense
+	chrVII	191001	191008	-	TTACCCT	1	query_pA_signal_upstream_feature	11.2604	5.63019	-19	intergenic_region	INT_0_3326	sense
-	chrII	723115	723122	+	TGACCCG	1	query_pA_signal_upstream_feature	10.8433	5.42166	-20	intergenic_region	INT_0_738	sense
+	chrV	131530	131537	-	TTACCCG	0	query_pA_signal_upstream_feature	10.8433	5.42166	-19	intergenic_region	INT_0_2630	sense
-	chrIV	629707	629714	+	TTACCCG	0	query_pA_signal_upstream_feature	10.8433	5.42166	-16	CUTs	CUT503	sense
+	chrIX	310939	310946	-	ACACCCG	2	query_pA_signal_upstream_feature	10.8433	5.42166	-24	intergenic_region	INT_0_2414	sense
+	chrXIII	247548	247555	+	TGACCCG	1	query_pA_signal_upstream_feature	10.5557	9.8007	-11	CUTs	CUT291	sense
-	chrXV	618577	618584	-	TTACCCG	0	query_pA_signal_upstream_feature	10.5557	9.8007	-27	5UTR	YOR152C	sense
+	chrV	336011	336018	-	TGACCCG	1	query_pA_signal_upstream_feature	10.4808	7.29839	-28	CDS	YER088W-B	sense
+	chrXVI	758464	758471	+	TTACTTG	2	query_pA_signal_upstream_feature	10.4263	5.21314	-14	intergenic_region	INT_0_8976	sense
-	chrIV	924040	924047	-	TTACCCG	0	query_pA_signal_upstream_feature	10.4263	5.21314	-14	intergenic_region	INT_0_1725	sense
+	chrIX	143085	143092	+	TTACCCG	0	query_pA_signal_upstream_feature	10.4263	5.21314	-18	CDS	HIS5	sense
+	chrXIV	695478	695485	-	TCACCCG	1	query_pA_signal_upstream_feature	10.4263	5.21314	-18	intergenic_region	INT_0_7487	sense
-	chrIV	1075361	1075368	+	TTACACA	2	query_pA_signal_upstream_feature	10.1814	7.08986	-24	tRNA_100_nt_downstream	INT_0_1835	sense
-	chrVII	166641	166648	-	TTACCCT	1	query_pA_signal_upstream_feature	10.0092	5.00461	-15	intergenic_region	INT_0_3312	sense
-	chrVII	35227	35234	+	TTACCCG	0	query_pA_signal_upstream_feature	10.0092	5.00461	-18	CUTs	CUT584	sense
+	chrXIII	302890	302897	+	TTACCCG	0	query_pA_signal_upstream_feature	10.0092	5.00461	-18	XUTs	XUT_13F-137	sense
+	chrVII	640526	640533	+	TTACCCG	0	query_pA_signal_upstream_feature	10.0092	5.00461	-20	intergenic_region	INT_0_3673	sense
+	chrXII	131573	131580	-	TTACCCG	0	query_pA_signal_upstream_feature	10.0092	5.00461	-18	intergenic_region	INT_0_5584	sense
+	chrXI	462913	462920	-	TTACCCG	0	query_pA_signal_upstream_feature	10.0092	5.00461	-20	XUTs	XUT_11F-207	sense
-	chrIV	1469192	1469199	+	TTACCCA	1	query_pA_signal_upstream_feature	10.0092	5.00461	-17	intergenic_region	INT_0_2121	sense
-	chrII	184163	184170	-	TTAAGCG	2	query_pA_signal_upstream_feature	9.76213	33.9896	-21	intergenic_region	INT_0_336	sense
+	chrXI	70688	70695	+	TTGCCCT	2	query_pA_signal_upstream_feature	9.59217	4.79609	-25	intergenic_region	INT_0_5057	sense
+	chrX	355340	355347	+	TTACCTT	2	query_pA_signal_upstream_feature	9.59217	4.79609	-30	intergenic_region	INT_0_4722	sense
+	chrIV	393469	393476	+	TTACCCG	0	query_pA_signal_upstream_feature	9.59217	4.79609	-14	antisense_CDS	INT_0_1346	sense
+	chrX	683629	683636	+	TTACCCG	0	query_pA_signal_upstream_feature	9.59217	4.79609	-20	intergenic_region	INT_0_4978	sense
+	chrVIII	151432	151439	+	TTACCCT	1	query_pA_signal_upstream_feature	9.59217	4.79609	-20	SUTs	XUT_8F-67	sense
+	chrXI	440129	440136	+	TTATACG	2	query_pA_signal_upstream_feature	9.52257	11.0518	-28	CUTs	CUT238	sense
+	chrIX	355632	355639	-	TTTCACG	2	query_pA_signal_upstream_feature	9.43273	8.75807	-19	3UTR	CUT195	sense
+	chrXV	772336	772343	+	ATACACG	2	query_pA_signal_upstream_feature	9.18319	19.1843	-25	3UTR	WTM1	sense
-	chrIII	120637	120644	+	TTACCCG	0	query_pA_signal_upstream_feature	9.17512	4.58756	-23	3UTR	INT_0_901	sense
-	chrXV	759663	759670	+	TTACCCG	0	query_pA_signal_upstream_feature	9.17512	4.58756	-20	snoRNA_300_nt_upstream	INT_0_8145	sense
+	chrXV	976380	976387	+	TTACTCG	1	query_pA_signal_upstream_feature	9.17512	4.58756	-27	intergenic_region	INT_0_8307	sense
-	chrVII	761222	761229	+	TTACCCT	1	query_pA_signal_upstream_feature	9.17512	4.58756	-18	intergenic_region	INT_0_3771	sense
-	chrIV	569947	569954	+	TTACCCG	0	query_pA_signal_upstream_feature	9.17512	4.58756	-19	intergenic_region	INT_0_1489	sense
-	chrVII	511166	511173	-	TTACCCG	0	query_pA_signal_upstream_feature	9.17512	4.58756	-17	intergenic_region	INT_0_3571	sense
-	chrIV	1090257	1090264	+	TTACCCG	0	query_pA_signal_upstream_feature	8.75807	4.37903	-19	3UTR	PIB1	sense
-	chrXV	234112	234119	+	TTATCCG	1	query_pA_signal_upstream_feature	8.75807	4.37903	-20	intergenic_region	INT_0_7739	sense
+	chrXI	581861	581868	+	TTACCCT	1	query_pA_signal_upstream_feature	8.75807	4.37903	-19	CUTs	CUT244	sense
+	chrX	432495	432502	-	TAACCCG	1	query_pA_signal_upstream_feature	8.34102	4.17051	-20	5UTR	INT_0_4784	sense
-	chrXIII	43682	43689	-	TTACCCG	0	query_pA_signal_upstream_feature	8.34102	4.17051	-13	5UTR	TAF8	sense
-	chrX	101089	101096	-	TTTCCCA	2	query_pA_signal_upstream_feature	8.0852	5.63019	-26	3UTR	INT_0_4531	sense
-	chrIII	176633	176640	-	TAGCCCG	2	query_pA_signal_upstream_feature	8.0852	5.63019	-15	5UTR	SYP1	sense
-	chrXI	171648	171655	+	TTACCCG	0	query_pA_signal_upstream_feature	7.92397	3.96198	-21	CDS	YKL147C	sense
-	chrXI	571040	571047	-	TTACCCG	0	query_pA_signal_upstream_feature	7.92397	3.96198	-20	CUTs	INT_0_5437	sense
-	chrX	359864	359871	-	TTACCCG	0	query_pA_signal_upstream_feature	7.92397	3.96198	-16	intergenic_region	INT_0_4727	sense
+	chrXIV	525930	525937	-	ATACCCG	1	query_pA_signal_upstream_feature	7.92397	3.96198	-18	intergenic_region	INT_0_7351	sense
-	chrV	208537	208544	+	TCACCCA	2	query_pA_signal_upstream_feature	7.92397	3.96198	-6	5UTR	CHO1	sense
+	chrXV	340402	340409	+	ATACACG	2	query_pA_signal_upstream_feature	7.92397	3.96198	-21	intergenic_region	INT_0_7820	sense
-	chrII	782451	782458	-	TAACACG	2	query_pA_signal_upstream_feature	7.92397	3.96198	-19	intergenic_region	INT_0_783	sense
+	chrVI	261726	261733	+	TTTCACG	2	query_pA_signal_upstream_feature	7.78575	5.42166	-6	CUTs	CUT123	sense
-	chrXI	451324	451331	+	CTACCCG	1	query_pA_signal_upstream_feature	7.50692	3.75346	-16	intergenic_region	INT_0_5349	sense
-	chrXV	943507	943514	+	TCACCCG	1	query_pA_signal_upstream_feature	7.50692	3.75346	-17	intergenic_region	INT_0_8284	sense
-	chrII	643194	643201	-	GTCCCCG	2	query_pA_signal_upstream_feature	7.50692	3.75346	-9	intergenic_region	INT_0_674	sense
-	chrX	649589	649596	+	TTACCCT	1	query_pA_signal_upstream_feature	7.50692	3.75346	-17	XUTs	XUT_10R-257	sense
-	chrXII	490766	490773	-	TTACCCG	0	query_pA_signal_upstream_feature	7.50692	3.75346	-14	intergenic_region	INT_0_5835	sense
+	chrIV	453916	453923	-	TTACCCG	0	query_pA_signal_upstream_feature	7.38648	15.4309	-19	3UTR	CUT061	sense
+	chrII	582291	582298	+	TTACCCG	0	query_pA_signal_upstream_feature	7.18684	13.3456	-19	5UTR	SWD3	sense
+	chrX	402688	402695	-	TTACCCG	0	query_pA_signal_upstream_feature	7.08986	3.54493	-20	intergenic_region	INT_0_4761	sense
+	chrXIII	851762	851769	-	TTACCCG	0	query_pA_signal_upstream_feature	7.08986	3.54493	-20	CDS	YMR290W-A	sense
-	chrXVI	163780	163787	+	TTACCCG	0	query_pA_signal_upstream_feature	7.05851	11.4689	-18	CUTs	CUT886	sense
-	chrIV	768310	768317	+	GTACCCG	1	query_pA_signal_upstream_feature	6.79423	212.904	-17	3UTR	CUT509	sense
-	chrIV	392624	392631	-	TTATACG	2	query_pA_signal_upstream_feature	6.73766	9.38364	-20	3UTR	SLM3	sense
+	chrXII	424019	424026	-	TTACGCG	1	query_pA_signal_upstream_feature	6.67281	3.33641	-9	CDS	RRN5	sense
+	chrX	355647	355654	+	TTCCACG	2	query_pA_signal_upstream_feature	6.67281	3.33641	-9	intergenic_region	INT_0_4724	sense
+	chrVII	1070096	1070103	-	TCACCCG	1	query_pA_signal_upstream_feature	6.67281	3.33641	-17	intergenic_region	INT_0_4003	sense
+	chrXII	899048	899055	+	TTACCCG	0	query_pA_signal_upstream_feature	6.67281	3.33641	-22	snoRNA_300_nt_upstream	INT_0_6155	sense
+	chrV	101646	101653	-	TTACCCG	0	query_pA_signal_upstream_feature	6.67281	3.33641	-29	intergenic_region	INT_0_2609	sense
+	chrXVI	655127	655134	+	TTTCCCT	2	query_pA_signal_upstream_feature	6.59946	39.8284	-11	CUTs	CUT427	sense
+	chrV	229595	229602	+	TTACCCG	0	query_pA_signal_upstream_feature	6.54516	10.6348	-24	3UTR	YER038W-A	sense
+	chrII	5903	5910	+	TTACCCT	1	query_pA_signal_upstream_feature	6.28849	5.83871	-25	CDS	YBL109W	sense
-	chrXV	1028837	1028844	-	TTACCCG	0	query_pA_signal_upstream_feature	6.28849	8.75807	-17	intergenic_region	INT_0_8351	sense
-	chrXII	566414	566421	+	TTACCCG	0	query_pA_signal_upstream_feature	6.25576	3.12788	-18	3UTR	INT_0_5897	antisense
+	chrIX	350191	350198	-	TTACCCG	0	query_pA_signal_upstream_feature	6.25576	3.12788	-19	3UTR	CFD1	sense
+	chrXI	614302	614309	+	ACACCCG	2	query_pA_signal_upstream_feature	6.25576	3.12788	-11	intergenic_region	INT_0_5473	sense
+	chrXVI	408950	408957	+	TTACCCG	0	query_pA_signal_upstream_feature	6.25576	3.12788	-15	intergenic_region	INT_0_8695	sense
-	chrII	535082	535089	-	TTATACG	2	query_pA_signal_upstream_feature	6.25576	3.12788	-21	intergenic_region	INT_0_589	sense
+	chrI	45647	45654	+	TTTCGCG	2	query_pA_signal_upstream_feature	6.25576	3.12788	-14	intergenic_region	INT_0_84	sense
-	chrIV	889415	889422	-	TGACGCG	2	query_pA_signal_upstream_feature	6.25576	3.12788	-6	intergenic_region	INT_0_1698	sense
-	chrXII	657037	657044	-	GTACCCC	2	query_pA_signal_upstream_feature	6.18867	116.357	-14	XUTs	INT_0_5965	sense
-	chrX	220478	220485	-	TTACCCG	0	query_pA_signal_upstream_feature	5.83871	2.91936	-17	intergenic_region	INT_0_4631	sense
+	chrXIII	104520	104527	-	TTACCCG	0	query_pA_signal_upstream_feature	5.83871	2.91936	-18	intergenic_region	INT_0_6344	sense
+	chrIX	244609	244616	-	TTACCCG	0	query_pA_signal_upstream_feature	5.83871	2.91936	-20	intergenic_region	INT_0_2361	sense
-	chrXIV	214739	214746	+	TTACCCG	0	query_pA_signal_upstream_feature	5.83871	2.91936	-17	intergenic_region	INT_0_7112	sense
+	chrVII	53705	53712	-	TTACCCG	0	query_pA_signal_upstream_feature	5.83871	2.91936	-19	5UTR	INT_0_3228	sense
+	chrX	663590	663597	-	TTACCCT	1	query_pA_signal_upstream_feature	5.83871	2.91936	-18	snoRNA_300_nt_upstream	INT_0_4966	sense
-	chrVI	263299	263306	+	TAACGCG	2	query_pA_signal_upstream_feature	5.83871	2.91936	-24	SUTs	XUT_6R-115	sense
+	chrXI	70249	70256	+	TTGCCTG	2	query_pA_signal_upstream_feature	5.83871	2.91936	-6	SUTs	XUT_11F-26	sense
-	chrVII	611541	611548	-	TTATACG	2	query_pA_signal_upstream_feature	5.83871	2.91936	-29	3UTR	INT_0_3651	sense
-	chrV	443305	443312	-	TTACCTT	2	query_pA_signal_upstream_feature	5.83871	2.91936	-28	intergenic_region	INT_0_2899	sense
+	chrX	587506	587513	+	TCACGCG	2	query_pA_signal_upstream_feature	5.70456	26.4827	-29	intergenic_region	INT_0_4903	sense
-	chrXI	352972	352979	-	TCACCCG	1	query_pA_signal_upstream_feature	5.5698	6.46429	-18	CUTs	CUT717	sense
-	chrVII	1063579	1063586	+	TTGCCCA	2	query_pA_signal_upstream_feature	5.42166	2.71083	-17	3UTR	INT_0_4001	sense
+	chrI	45552	45559	-	TTACCCG	0	query_pA_signal_upstream_feature	5.42166	2.71083	-22	XUTs	XUT_1F-25	sense
-	chrXIII	30001	30008	+	TTACCCG	0	query_pA_signal_upstream_feature	5.42166	2.71083	-15	5UTR	NDI1	sense
-	chrV	431398	431405	-	TTACATG	2	query_pA_signal_upstream_feature	5.42166	2.71083	-29	snoRNA_300_nt_upstream	INT_0_2883	sense
+	chrXVI	789577	789584	+	TTACCCG	0	query_pA_signal_upstream_feature	5.42166	2.71083	-11	3UTR	YLH47	sense
+	chrII	492992	492999	+	TTACCCG	0	query_pA_signal_upstream_feature	5.42166	2.71083	-23	intergenic_region	INT_0_565	sense
-	chrVII	591679	591686	+	TTACCCC	1	query_pA_signal_upstream_feature	5.42166	2.71083	-29	3UTR	XUT_7R-269	sense
-	chrVIII	16696	16703	-	TTATGCG	2	query_pA_signal_upstream_feature	5.42166	2.71083	-23	intergenic_region	INT_0_4033	sense
-	chrIV	1279012	1279019	+	CTACCTG	2	query_pA_signal_upstream_feature	5.42166	2.71083	-10	CUTs	INT_0_1983	sense
+	chrXIII	628884	628891	+	TTACCCG	0	query_pA_signal_upstream_feature	5.21046	6.04724	-30	3UTR	ADD37	sense
-	chrXIV	720856	720863	-	TTACCCG	0	query_pA_signal_upstream_feature	5.09068	3.54493	-28	3UTR	INT_0_7507	sense
-	chrVII	905068	905075	-	TTACCCG	0	query_pA_signal_upstream_feature	5.00461	2.50231	-14	SUTs	XUT_7R-418	sense
+	chrX	414919	414926	+	TTACTTG	2	query_pA_signal_upstream_feature	5.00461	2.50231	-26	intergenic_region	INT_0_4771	sense
+	chrIV	1410351	1410358	-	TGACCCA	2	query_pA_signal_upstream_feature	5.00461	2.50231	-28	intergenic_region	INT_0_2077	sense
+	chrXVI	227980	227987	+	TTACCCT	1	query_pA_signal_upstream_feature	5.00461	2.50231	-14	intergenic_region	INT_0_8570	sense
-	chrX	159728	159735	+	TTGCCCG	1	query_pA_signal_upstream_feature	5.00461	2.50231	-19	CDS	YJL133C-A	sense
-	chrIV	784614	784621	+	TTTCCCA	2	query_pA_signal_upstream_feature	5.00461	2.50231	-17	CUTs	CUT513	sense
-	chrXV	631944	631951	+	TTACCCG	0	query_pA_signal_upstream_feature	5.00461	2.50231	-21	intergenic_region	INT_0_8051	sense
+	chrIV	867714	867721	+	TCACCCG	1	query_pA_signal_upstream_feature	5.00461	2.50231	-17	intergenic_region	INT_0_1692	sense
+	chrXIV	632549	632556	-	CTACACG	2	query_pA_signal_upstream_feature	5.00461	2.50231	-23	intergenic_region	INT_0_7441	sense
+	chrIV	199844	199851	-	TTCCCCG	1	query_pA_signal_upstream_feature	5.00461	2.50231	-30	intergenic_region	INT_0_1195	sense
-	chrIII	236970	236977	+	TTACCCG	0	query_pA_signal_upstream_feature	5.00461	2.50231	-18	intergenic_region	INT_0_1002	sense
-	chrX	436414	436421	+	TAACACG	2	query_pA_signal_upstream_feature	5.00461	2.50231	-23	intergenic_region	INT_0_4789	sense
+	chrXIII	290752	290759	+	TAACTCG	2	query_pA_signal_upstream_feature	4.82866	8.96659	-19	intergenic_region	INT_0_6483	sense
-	chrX	360992	360999	+	TTCCTCG	2	query_pA_signal_upstream_feature	4.79123	3.33641	-16	XUTs	XUT_10R-136	sense
-	chrXV	315665	315672	+	TTACCCG	0	query_pA_signal_upstream_feature	4.79123	36.7005	-17	3UTR	INT_0_7803	sense
-	chrII	768105	768112	+	TTTCACG	2	query_pA_signal_upstream_feature	4.58756	2.29378	-10	intergenic_region	INT_0_774	sense
+	chrIV	304945	304952	+	TTACCCT	1	query_pA_signal_upstream_feature	4.58756	2.29378	-22	3UTR	NDE2	sense
+	chrXVI	393892	393899	-	TAACCCG	1	query_pA_signal_upstream_feature	4.58756	2.29378	-19	intergenic_region	INT_0_8686	sense
+	chrIV	410339	410346	-	TTACATG	2	query_pA_signal_upstream_feature	4.58756	2.29378	-24	intergenic_region	INT_0_1362	sense
-	chrVII	836872	836879	-	TTACCCT	1	query_pA_signal_upstream_feature	4.58756	2.29378	-16	intergenic_region	INT_0_3835	sense
-	chrIII	163742	163749	+	CCACCCG	2	query_pA_signal_upstream_feature	4.58756	2.29378	-18	CDS	YCR025C	sense
-	chrVII	1084288	1084295	-	TTACCCT	1	query_pA_signal_upstream_feature	4.58756	2.29378	-28	intergenic_region	INT_0_4016	sense
+	chrXVI	147277	147284	+	TTACCCG	0	query_pA_signal_upstream_feature	4.49178	4.17051	-21	3UTR	CBP3	sense
+	chrXV	683733	683740	+	TTACCCG	0	query_pA_signal_upstream_feature	4.39196	9.17512	-16	3UTR	INT_0_8102	sense
-	chrXII	263055	263062	+	TTACCGA	2	query_pA_signal_upstream_feature	4.17051	2.08525	-6	intergenic_region	INT_0_5679	sense
+	chrVII	1070109	1070116	+	TTTCCTG	2	query_pA_signal_upstream_feature	4.17051	2.08525	-30	intergenic_region	INT_0_4003	sense
+	chrII	636781	636788	+	TTACCCG	0	query_pA_signal_upstream_feature	4.17051	2.08525	-15	3UTR	INT_0_670	sense
-	chrXVI	627133	627140	-	TTACCCG	0	query_pA_signal_upstream_feature	4.17051	2.08525	-11	intergenic_region	INT_0_8866	sense
-	chrII	241547	241554	+	TTACCCC	1	query_pA_signal_upstream_feature	4.06902	32.1129	-28	3UTR	INT_0_371	sense
+	chrIX	268495	268502	+	TTGCGCG	2	query_pA_signal_upstream_feature	4.0426	9.38364	-22	CDS	YIL046W-A	sense
-	chrXV	153651	153658	-	TTACCCT	1	query_pA_signal_upstream_feature	3.77309	4.37903	-16	3UTR	INT_0_7681	sense
-	chrVI	148610	148617	+	TTTTCCG	2	query_pA_signal_upstream_feature	3.77309	4.37903	-26	intergenic_region	INT_0_3097	sense
-	chrVII	756626	756633	+	TTACCCG	0	query_pA_signal_upstream_feature	3.75346	1.87673	-21	5UTR	PHB1	sense
+	chrIV	1201711	1201718	+	TTATCCC	2	query_pA_signal_upstream_feature	3.75346	1.87673	-27	intergenic_region	INT_0_1926	sense
-	chrVII	733101	733108	+	TTTTCCG	2	query_pA_signal_upstream_feature	3.75346	1.87673	-23	5UTR	MEP1	sense
+	chrXIV	104169	104176	-	TTACCCG	0	query_pA_signal_upstream_feature	3.75346	1.87673	-18	intergenic_region	INT_0_7040	sense
-	chrXIII	303014	303021	-	TTCCCCG	1	query_pA_signal_upstream_feature	3.75346	1.87673	-26	3UTR	SOK2	sense
-	chrXIV	233872	233879	+	TTACCCG	0	query_pA_signal_upstream_feature	3.75346	1.87673	-18	5UTR	POP1	sense
-	chrII	589293	589300	+	TTACCCG	0	query_pA_signal_upstream_feature	3.75346	1.87673	-25	intergenic_region	INT_0_631	sense
+	chrXII	903489	903496	+	TTACCCG	0	query_pA_signal_upstream_feature	3.42373	71.5242	-12	3UTR	ECM19	sense
-	chrV	140265	140272	-	TTGCCCA	2	query_pA_signal_upstream_feature	3.38204	13.3456	-15	3UTR	GCN4	sense
-	chrVII	884310	884317	+	TCACCCA	2	query_pA_signal_upstream_feature	3.33641	1.6682	-15	3UTR	INT_0_3871	sense
-	chrVII	857518	857525	-	TTACTTG	2	query_pA_signal_upstream_feature	3.33641	1.6682	-29	intergenic_region	INT_0_3853	sense
-	chrXVI	38940	38947	+	TTACCCG	0	query_pA_signal_upstream_feature	3.33641	1.6682	-23	intergenic_region	INT_0_8416	sense
+	chrIV	1493224	1493231	+	ATACCCG	1	query_pA_signal_upstream_feature	3.3292	13.1371	-12	3UTR	RBA50	sense
+	chrXIV	117188	117195	+	CTACCTG	2	query_pA_signal_upstream_feature	3.23408	3.75346	-28	3UTR	YNL277W-A	sense
-	chrXIV	258296	258303	-	TTACCCC	1	query_pA_signal_upstream_feature	3.14424	4.37903	-10	CDS	YNL205C	sense
-	chrII	370768	370775	-	TTTCCGG	2	query_pA_signal_upstream_feature	3.08008	5.00461	-14	5UTR	NRG2	sense
-	chrXIV	618356	618363	-	TTACCCT	1	query_pA_signal_upstream_feature	3.06938	8.54954	-11	3UTR	SIS1	sense
-	chrXV	348961	348968	-	TTGCCCC	2	query_pA_signal_upstream_feature	3.05441	3.54493	-18	SUTs	INT_0_7829	sense
+	chrIV	682035	682042	-	TGATCCG	2	query_pA_signal_upstream_feature	3.05441	3.54493	-11	antisense_CDS	INT_0_1564	sense
-	chrII	217277	217284	+	TTCCGCG	2	query_pA_signal_upstream_feature	2.99452	2.08525	-11	intergenic_region	INT_0_358	sense
-	chrVII	974669	974676	+	TAACCCG	1	query_pA_signal_upstream_feature	2.93463	10.2177	-26	3UTR	YGR240C-A	sense
+	chrXI	517156	517163	+	TTCCCCG	1	query_pA_signal_upstream_feature	2.91936	1.45968	-17	3UTR	INT_0_5396	sense
-	chrVIII	381420	381427	-	TTTCCCG	1	query_pA_signal_upstream_feature	2.91936	1.45968	-26	intergenic_region	INT_0_4321	sense
+	chrIV	1384948	1384955	+	TTACCCA	1	query_pA_signal_upstream_feature	2.8584	7.29839	-29	3UTR	TFB3	sense
+	chrXVI	135619	135626	+	TTACGGG	2	query_pA_signal_upstream_feature	2.81966	89.6659	-19	3UTR	FLC1	sense
-	chrXI	339613	339620	+	TTACCCT	1	query_pA_signal_upstream_feature	2.81261	69.856	-7	3UTR	INT_0_5269	sense
-	chrXII	54104	54111	+	TTGCGCG	2	query_pA_signal_upstream_feature	2.69507	5.00461	-27	3UTR	INT_0_5541	sense
-	chrIV	1257106	1257113	-	TTACCAC	2	query_pA_signal_upstream_feature	2.69507	3.12788	-29	intergenic_region	INT_0_1966	sense
+	chrXV	413711	413718	+	TTATACG	2	query_pA_signal_upstream_feature	2.65423	13.5542	-12	3UTR	IRC23	sense
+	chrXIV	663887	663894	+	TTTCCCG	1	query_pA_signal_upstream_feature	2.63892	9.8007	-12	3UTR	TIM23	sense
+	chrVI	129994	130001	+	TTACTCT	2	query_pA_signal_upstream_feature	2.51843	276.505	-16	3UTR	INT_0_3088	sense
+	chrXIII	355221	355228	+	TTATACG	2	query_pA_signal_upstream_feature	2.50231	1.25115	-28	3UTR	INT_0_6537	sense
-	chrXIII	779260	779267	+	TTTCTCG	2	query_pA_signal_upstream_feature	2.50231	1.25115	-15	3UTR	INT_0_6860	sense
-	chrII	728257	728264	+	GTACCCG	1	query_pA_signal_upstream_feature	2.50231	1.25115	-18	intergenic_region	INT_0_744	sense
-	chrIV	238827	238834	-	CTACCCG	1	query_pA_signal_upstream_feature	2.43839	19.8099	-20	3UTR	INT_0_1222	sense
+	chrXIV	68544	68551	+	TTTCCCT	2	query_pA_signal_upstream_feature	2.41865	7.29839	-15	3UTR	TRF5	sense
+	chrXIV	91642	91649	+	TCACCCG	1	query_pA_signal_upstream_feature	2.35818	8.75807	-30	3UTR	CAF40	sense
+	chrXIII	695255	695262	-	TTTGCCG	2	query_pA_signal_upstream_feature	2.15605	2.50231	-30	3UTR	INT_0_6798	sense
+	chrVI	149875	149882	-	TTACCCG	0	query_pA_signal_upstream_feature	2.14223	12.9286	-26	3UTR	LOC1	sense
-	chrXV	1017682	1017689	-	TTACCCT	1	query_pA_signal_upstream_feature	2.11059	81.3249	-25	3UTR	PRE10	sense
-	chrII	203258	203265	+	TAACCCG	1	query_pA_signal_upstream_feature	2.08525	1.04263	-21	intergenic_region	INT_0_347	sense
+	chrVII	584717	584724	+	ATACCCT	2	query_pA_signal_upstream_feature	2.08525	1.04263	-23	intergenic_region	INT_0_3628	sense
+	chrXI	245707	245714	+	TTTCCCA	2	query_pA_signal_upstream_feature	2.08525	1.04263	-14	intergenic_region	INT_0_5185	sense
+	chrVII	371348	371355	+	ATACCGG	2	query_pA_signal_upstream_feature	2.05338	3.33641	-12	3UTR	HSF1	sense
-	chrII	553418	553425	-	TTACGCT	2	query_pA_signal_upstream_feature	2.04172	10.4263	-6	3UTR	SLI15	sense
+	chrXIV	549416	549423	-	TTGCCCA	2	query_pA_signal_upstream_feature	2.01672	22.9378	-24	3UTR	BOP3	sense

## Sheet: Rap1p_roadblock_sites
cluster peak strand	cluster peak chromosome	motif start	motif end	motif_strand	motif_sequence	mismatches from consensus	category	criteria for calling site	total cluster signal	distance from motif boundary to cluster peak (bp)	type of region	gene name	gene strand
-	chrIX	257504	257516	+	ACACCCAAACAA	2	query_pA_signal_upstream_feature	38.3687	19.1843	-18	intergenic_region	INT_0_2375	sense
+	chrIX	290213	290225	+	ACATATATACAT	3	query_pA_signal_upstream_feature	2.24589	3.12788	-23	SUTs	SUT187	sense
+	chrX	142739	142751	-	ACAGTCATACAA	3	query_pA_signal_upstream_feature	6.25576	3.12788	-25	CUTs	CUT203	sense
-	chrX	543077	543089	+	ACACATATACAA	3	query_pA_signal_upstream_feature	7.08986	3.54493	-24	intergenic_region	INT_0_4870	sense
-	chrX	701769	701781	+	ACACACACACAT	2	query_pA_signal_upstream_feature	3.33675	5.42166	-28	3UTR	INT_0_4985	sense
-	chrX	460231	460243	+	AAACCGAAACAT	3	query_pA_signal_upstream_feature	5.83871	2.91936	-28	CDS	YJR012C	sense
-	chrX	434797	434809	+	ACGCGCATACTT	3	query_pA_signal_upstream_feature	57.553	28.7765	-21	SUTs	SUT636	sense
+	chrII	88084	88096	-	ACACCTATCAAT	3	query_pA_signal_upstream_feature	102.177	51.0887	-7	snoRNA_300_nt_upstream	INT_0_264	sense
-	chrII	593085	593097	-	GCATCCATACAT	2	query_pA_signal_upstream_feature	3.75346	1.87673	-29	3UTR	INT_0_634	sense
-	chrII	452422	452434	+	ACGCCCATAATT	3	query_pA_signal_upstream_feature	10.8433	5.42166	-20	intergenic_region	INT_0_538	sense
+	chrII	605915	605927	+	ACACCTGTACAT	2	query_pA_signal_upstream_feature	43.7903	21.8952	-15	intergenic_region	INT_0_646	sense
+	chrVI	90854	90866	-	ACACCCAAACAT	1	query_pA_signal_upstream_feature	5.00461	2.50231	-26	intergenic_region	INT_0_3052	sense
-	chrVI	95636	95648	-	GCACCCACACAC	3	query_pA_signal_upstream_feature	12.5115	6.25576	-13	3UTR	XUT_6R-35	sense
-	chrVI	205043	205055	+	ACAGCAAGACAT	3	query_pA_signal_upstream_feature	13.3456	6.67281	-9	intergenic_region	INT_0_3138	sense
-	chrVI	158066	158078	+	ACACCTTTAAAT	3	query_pA_signal_upstream_feature	10.8433	5.42166	-9	XUTs	INT_0_3106	sense
+	chrXV	161246	161258	-	AAACCCATACAT	1	query_pA_signal_upstream_feature	42.9562	21.4781	-21	5UTR	INT_0_7686	sense
-	chrXV	960345	960357	+	CCACCCATACAC	2	query_pA_signal_upstream_feature	9.59217	4.79609	-17	5UTR	RPA43	sense
+	chrXIV	604869	604881	-	ACAGCCATTCTT	3	query_pA_signal_upstream_feature	3.28667	31.2788	-26	3UTR	PUB1	sense
+	chrXIV	764145	764157	-	GCACCCAGACAC	3	query_pA_signal_upstream_feature	17.5161	8.75807	-22	intergenic_region	INT_0_7539	sense
+	chrXIV	169819	169831	-	ACACCTATACAT	1	query_pA_signal_upstream_feature	2.54534	3.54493	-24	SUTs	XUT_14F-55	sense
+	chrXIV	442956	442968	-	ACAACGATACGT	3	query_pA_signal_upstream_feature	57.136	28.568	-16	intergenic_region	INT_0_7287	sense
-	chrXIV	116903	116915	+	AAACGCTTACAT	3	query_pA_signal_upstream_feature	10.8433	5.42166	-5	intergenic_region	INT_0_7054	sense
-	chrXIV	330949	330961	+	ACATCCTTACAT	2	query_pA_signal_upstream_feature	5.00461	2.50231	-7	XUTs	XUT_14R-128	sense
+	chrXIV	302420	302432	+	ACATCCATACCT	2	query_pA_signal_upstream_feature	15.8479	7.92397	-15	CUTs	CUT329	sense
+	chrXIV	90041	90053	+	CCACCCACACAC	3	query_pA_signal_upstream_feature	8.34102	4.17051	-16	intergenic_region	INT_0_7032	sense
+	chrXIII	298717	298729	+	ACACCCAGACAT	1	query_pA_signal_upstream_feature	13.8452	109.267	-10	snoRNA_300_nt_downstream	YMR013W-A	sense
-	chrIV	1259734	1259746	-	AAACCCATGCAC	3	query_pA_signal_upstream_feature	7.08703	14.8053	-14	SUTs	SUT487	sense
-	chrIV	125478	125490	-	GAACCCATACAC	3	query_pA_signal_upstream_feature	37.9516	18.9758	-13	3UTR	INT_0_1140	sense
+	chrIV	1059470	1059482	-	GAACCCATAAAT	3	query_pA_signal_upstream_feature	10.8433	5.42166	-28	intergenic_region	INT_0_1824	sense
+	chrIV	1289258	1289270	+	ACACCCATTCAC	2	query_pA_signal_upstream_feature	40.4539	20.227	-16	intergenic_region	XUT_4F-592	sense
+	chrIV	229629	229641	+	AAACCCATACAT	1	query_pA_signal_upstream_feature	6.96225	6.46429	-13	3UTR	STF1	sense
+	chrVIII	512239	512251	-	AAACCTATGCAT	3	query_pA_signal_upstream_feature	3.33641	1.6682	-11	intergenic_region	INT_0_4425	sense
-	chrVIII	353468	353480	-	ACACCCAAGCAT	2	query_pA_signal_upstream_feature	7.50692	3.75346	-22	intergenic_region	INT_0_4288	sense
+	chrVIII	25630	25642	+	ACACCCATACAC	1	query_pA_signal_upstream_feature	11.2604	5.63019	-15	intergenic_region	INT_0_4037	sense
+	chrVIII	123761	123773	+	ACATCCCTACTT	3	query_pA_signal_upstream_feature	17.0991	8.54954	-20	SUTs	SUT153	sense
-	chrXVI	866588	866600	-	ACACCCATACAC	1	query_pA_signal_upstream_feature	14.1797	7.08986	-9	3UTR	ORC4	sense
-	chrXVI	172931	172943	+	AAATCCGTACAT	3	query_pA_signal_upstream_feature	5.00461	2.50231	-19	intergenic_region	INT_0_8525	sense
+	chrXVI	121560	121572	+	AAACCCAAACAC	3	query_pA_signal_upstream_feature	7.50692	3.75346	-13	intergenic_region	INT_0_8482	sense
+	chrXVI	406370	406382	+	ACATCCGTACCT	3	query_pA_signal_upstream_feature	21.2696	10.6348	-11	antisense_CDS	INT_0_8693	sense
-	chrIII	178472	178484	-	ACATCTGTACAT	3	query_pA_signal_upstream_feature	182.142	169.114	-13	snoRNA_300_nt_downstream	CUT466	sense
-	chrIII	125535	125547	+	TTAACCATACAT	3	query_pA_signal_upstream_feature	2.50231	1.25115	-17	3UTR	INT_0_907	sense
-	chrVII	649134	649146	-	GAACCCATACAT	2	query_pA_signal_upstream_feature	8.34102	4.17051	-17	intergenic_region	INT_0_3682	sense
-	chrVII	366237	366249	-	ACACCCACACAT	1	query_pA_signal_upstream_feature	2198.28	1099.14	-13	snoRNA_300_nt_downstream	INT_0_3455	sense
+	chrVII	920071	920083	+	AAACCCAAACAT	2	query_pA_signal_upstream_feature	7.08986	3.54493	-12	intergenic_region	INT_0_3901	sense
-	chrVII	191829	191841	+	ATACATATACAT	3	query_pA_signal_upstream_feature	2.09616	7.29839	-16	3UTR	YGL165C	sense
+	chrVII	428141	428153	+	AGACACATACAT	2	query_pA_signal_upstream_feature	7.92397	3.96198	-15	intergenic_region	INT_0_3514	sense
+	chrVII	371354	371366	+	GCACCCATGCAC	3	query_pA_signal_upstream_feature	2.69507	2.50231	-18	3UTR	HSF1	sense
+	chrVII	254327	254339	+	GAACCCATACAT	2	query_pA_signal_upstream_feature	8.75807	4.37903	-13	intergenic_region	INT_0_3368	sense
-	chrVII	884310	884322	+	TCACCCAGACAC	3	query_pA_signal_upstream_feature	2.91936	1.45968	-10	3UTR	INT_0_3871	sense
-	chrXI	642856	642868	-	CCACCCACGCAT	3	query_pA_signal_upstream_feature	9.17512	4.58756	-11	intergenic_region	INT_0_5490	sense
+	chrXI	379140	379152	-	ACTCGCATATAT	3	query_pA_signal_upstream_feature	5.83871	2.91936	-6	intergenic_region	INT_0_5298	sense
+	chrXI	108920	108932	+	ACATCCGTACAT	2	query_pA_signal_upstream_feature	14.3737	16.682	-13	intergenic_region	INT_0_5083	sense
+	chrXI	431493	431505	+	ACACCCATACAC	1	query_pA_signal_upstream_feature	18.7673	9.38364	-17	XUTs	XUT_11F-191	sense
+	chrXI	614302	614314	+	ACACCCGCACAC	3	query_pA_signal_upstream_feature	6.25576	3.12788	-11	intergenic_region	INT_0_5473	sense
-	chrV	221713	221725	-	TCACCCATACAC	2	query_pA_signal_upstream_feature	22.1037	11.0518	-13	intergenic_region	INT_0_2710	sense
-	chrV	311750	311762	-	ACACCCACCGAT	3	query_pA_signal_upstream_feature	7.08986	3.54493	-18	intergenic_region	INT_0_2791	sense
-	chrV	46994	47006	-	ACATCCGTACAC	3	query_pA_signal_upstream_feature	10.0092	5.00461	-13	XUTs	XUT_5R-26	sense
+	chrV	85270	85282	+	ACACCCAGACCT	2	query_pA_signal_upstream_feature	105.514	52.7569	-12	antisense_CDS	INT_0_2593	sense
+	chrV	305984	305996	+	ACACCCACACAT	1	query_pA_signal_upstream_feature	7.50692	3.75346	-25	intergenic_region	INT_0_2787	sense
+	chrV	6348	6360	+	ACACCCACACAC	2	query_pA_signal_upstream_feature	2.91936	1.45968	-16	CDS	YEL074W	sense
+	chrV	53718	53730	+	ACACCCACACAT	1	query_pA_signal_upstream_feature	9.17512	4.58756	-19	intergenic_region	INT_0_2570	sense
+	chrV	85299	85311	+	CCACCCATACCC	3	query_pA_signal_upstream_feature	42.1221	21.0611	-14	antisense_CDS	INT_0_2593	sense
-	chrV	261832	261844	+	ACGCCCACACAC	3	query_pA_signal_upstream_feature	13.8746	28.985	-27	3UTR	INT_0_2745	sense
+	chrV	566953	566965	+	ACTCGAATACAT	3	query_pA_signal_upstream_feature	4.17051	2.08525	-30	intergenic_region	INT_0_2990	sense
-	chrV	431253	431265	+	ACGCCGAAACAT	3	query_pA_signal_upstream_feature	182.668	91.3341	-29	snoRNA_300_nt_upstream	CUT567	sense
-	chrXII	234703	234715	-	GCACCCATACCT	2	query_pA_signal_upstream_feature	6.64783	7.71544	-9	3UTR	INT_0_5661	sense
+	chrXII	48903	48915	-	AGATCCGTACAT	3	query_pA_signal_upstream_feature	11.264	67.9793	-16	intergenic_region	INT_0_5537	sense
-	chrXII	793687	793699	+	CCACCCAAACAT	2	query_pA_signal_upstream_feature	11.6774	5.83871	-18	CUTs	CUT748	sense
+	chrXII	805622	805634	+	ACATCCGAACAT	3	query_pA_signal_upstream_feature	11.6774	5.83871	-14	intergenic_region	INT_0_6086	sense

## Sheet: Abf1p_roadblock_sites
cluster peak strand	cluster peak chromosome	motif start	motif end	motif_strand	motif_sequence	mismatches from consensus	category	criteria for calling site	total cluster signal	distance from motif boundary to cluster peak (bp)	type of region	gene name	gene strand
-	chrXVI	230950	230966	-	TTCAGTAAGAGCTGAA	2	query_pA_signal_upstream_feature	3.75346	1.87673	-21	intergenic_region	INT_0_8573	sense
-	chrXVI	264896	264912	-	TCACATCCGTTAGGAT	2	query_pA_signal_upstream_feature	6.25576	3.12788	-21	intergenic_region	INT_0_8593	sense
-	chrXVI	746953	746969	-	TTCCGTTTATAGTGAC	1	query_pA_signal_upstream_feature	4.58756	2.29378	-13	intergenic_region	INT_0_8970	sense
+	chrXVI	305131	305147	-	TCTCGTCTTGAGTGAT	0	query_pA_signal_upstream_feature	9.59217	4.79609	-28	intergenic_region	INT_0_8624	sense
+	chrXVI	742244	742260	-	CGCCGTCGGTTATGAT	1	query_pA_signal_upstream_feature	6.25576	3.12788	-22	intergenic_region	INT_0_8965	sense
-	chrXVI	56300	56316	-	TGACGTATCCCATTTT	2	query_pA_signal_upstream_feature	66.3111	33.1555	-21	intergenic_region	INT_0_8436	sense
-	chrXVI	128355	128371	-	TCACGGACCTCCAGAT	2	query_pA_signal_upstream_feature	37.5346	18.7673	-29	3UTR	INT_0_8487	sense
-	chrXVI	277693	277709	+	TTTCGTCAAATATGAC	1	query_pA_signal_upstream_feature	5.42166	2.71083	-29	3UTR	INT_0_8601	sense
-	chrXVI	251906	251922	+	TATCGTCGATGGTGAT	0	query_pA_signal_upstream_feature	2.87474	3.33641	-24	3UTR	INT_0_8584	sense
-	chrXVI	824534	824550	+	ATGCGTATCGAACGAT	2	query_pA_signal_upstream_feature	3.33641	1.6682	-18	3UTR	YPR145C-A	sense
+	chrXVI	462279	462295	+	TGTCGTGTCTAGTGAC	1	query_pA_signal_upstream_feature	7.59519	19.3929	-13	intergenic_region	INT_0_8741	sense
+	chrXV	772330	772346	-	GCTCGTGTATAGTGAC	2	query_pA_signal_upstream_feature	3.30973	29.1936	-30	3UTR	WTM1	sense
-	chrXV	61167	61183	-	TAATGCAATACCTGAT	2	query_pA_signal_upstream_feature	2.91965	2.71083	-9	intergenic_region	INT_0_7607	sense
+	chrXV	413705	413721	-	CTACGTATAAAGTGAC	2	query_pA_signal_upstream_feature	2.52395	12.303	-6	3UTR	IRC23	sense
+	chrXV	884240	884256	-	GCCCGTTAATTATGAC	2	query_pA_signal_upstream_feature	2.0213	9.38364	-28	3UTR	CPA1	sense
+	chrXV	1009822	1009838	-	TCACGTACTAAGTGAT	0	query_pA_signal_upstream_feature	4.17051	2.08525	-16	intergenic_region	INT_0_8335	sense
-	chrXV	273823	273839	+	TTTATTTGGAGATGAT	2	query_pA_signal_upstream_feature	4.19232	2.91936	-28	3UTR	INT_0_7771	sense
-	chrXV	366634	366650	+	TTCCGTTTAATATGAC	1	query_pA_signal_upstream_feature	6.25576	3.12788	-21	antisense_CDS	INT_0_7842	sense
-	chrXV	1003345	1003361	+	TATCGTATATGATGAT	0	query_pA_signal_upstream_feature	12.0945	6.04724	-15	CUTs	INT_0_8330	sense
-	chrXV	207297	207313	+	AATCGCAACACGTGAT	2	query_pA_signal_upstream_feature	2.28256	51.9228	-28	3UTR	CRT10	sense
-	chrXV	252797	252813	+	GTTCGTTTTAAGTGAT	1	query_pA_signal_upstream_feature	7.50692	3.75346	-26	intergenic_region	INT_0_7754	sense
-	chrXIV	339469	339485	-	TTCCGTCATTGATGAT	0	query_pA_signal_upstream_feature	3.75346	1.87673	-13	5UTR	ASI2	sense
-	chrXIV	614482	614498	-	TCCTTTATTTTTTGAT	2	query_pA_signal_upstream_feature	3.75346	1.87673	-17	XUTs	INT_0_7425	sense
-	chrXIV	713791	713807	-	GAACGTATTAAATGAG	2	query_pA_signal_upstream_feature	3.05441	3.54493	-24	3UTR	MSO1	sense
-	chrXIV	424685	424701	-	ATACGTGTGGGGTGAC	2	query_pA_signal_upstream_feature	4.96234	24.189	-18	3UTR	INT_0_7275	sense
-	chrXIV	476759	476775	+	TGTCGTCAATAGGGAT	1	query_pA_signal_upstream_feature	4.49178	4.17051	-22	3UTR	INT_0_7312	sense
+	chrXIII	355223	355239	-	TTCCGTACACTCGTAT	2	query_pA_signal_upstream_feature	2.08525	1.04263	-30	3UTR	INT_0_6537	sense
-	chrXIII	196201	196217	-	TTTACTATTCGGTGAT	2	query_pA_signal_upstream_feature	12.5115	6.25576	-20	intergenic_region	INT_0_6409	sense
+	chrXIII	628877	628893	-	TGCGGGTAACCTTGAT	2	query_pA_signal_upstream_feature	5.21046	6.04724	-23	3UTR	ADD37	sense
-	chrXIII	671457	671473	+	CTCCGTTCTTCGTGAT	1	query_pA_signal_upstream_feature	3.03195	16.8906	-15	3UTR	INT_0_6786	sense
+	chrXII	543414	543430	-	AGCCGTTGCTCATGAT	1	query_pA_signal_upstream_feature	25.0231	12.5115	-21	XUTs	XUT_12F-209	sense
+	chrXII	82174	82190	-	AGTCGTTGAAAGTGAT	1	query_pA_signal_upstream_feature	15.8479	7.92397	-12	CDS	FRA1	sense
+	chrXII	260806	260822	-	TGTCGTGATAAATAAT	1	query_pA_signal_upstream_feature	9.59217	4.79609	-12	5UTR	SUT255	sense
+	chrXII	645180	645196	+	TGCCGTCACAGATGAT	0	query_pA_signal_upstream_feature	2.08525	1.04263	-28	intergenic_region	INT_0_5957	sense
-	chrXII	566410	566426	+	TCTGTTACCCGGTGAT	2	query_pA_signal_upstream_feature	6.25576	3.12788	-13	3UTR	INT_0_5897	antisense
-	chrXII	489425	489441	+	TAGTGTAGTGGGTGAC	2	query_pA_signal_upstream_feature	4.58756	2.29378	-26	intergenic_region	INT_0_5835	sense
+	chrXII	912443	912459	+	GTTCGTGTGAAGTGAT	1	query_pA_signal_upstream_feature	32.947	16.4735	-11	CUTs	CUT276	sense
-	chrXI	294474	294490	+	TTTCGTTATATTTCAA	2	query_pA_signal_upstream_feature	2.20505	16.8906	-6	3UTR	INT_0_5226	sense
-	chrXI	313522	313538	+	TTATGTACTCTTTGCT	2	query_pA_signal_upstream_feature	6.67281	3.33641	-7	intergenic_region	INT_0_5245	sense
-	chrXI	461451	461467	+	TATCGTATAATGCGAC	2	query_pA_signal_upstream_feature	4.17051	2.08525	-27	3UTR	INT_0_5355	sense
-	chrX	211805	211821	-	CGTCGTTCCTAGTGAT	1	query_pA_signal_upstream_feature	7.08986	3.54493	-8	intergenic_region	INT_0_4628	sense
-	chrX	419674	419690	-	TAGCGAGAATTTTCAT	2	query_pA_signal_upstream_feature	5.53986	15.4309	-29	3UTR	INT_0_4777	sense
+	chrX	402693	402709	-	TCGCGTCTCATATGTT	1	query_pA_signal_upstream_feature	6.25576	3.12788	-25	intergenic_region	INT_0_4761	sense
-	chrX	640510	640526	-	ATTCGTATGCGATGAC	2	query_pA_signal_upstream_feature	5.42166	2.71083	-18	intergenic_region	INT_0_4946	sense
+	chrX	587505	587521	-	CTTCGTATCGCGTGAT	1	query_pA_signal_upstream_feature	5.70456	26.4827	-28	intergenic_region	INT_0_4903	sense
+	chrX	467140	467156	+	GCTCGTGAAAGGTGAT	1	query_pA_signal_upstream_feature	19.6014	9.8007	-24	CDS	YJR018W	sense
+	chrX	37805	37821	+	TCACGTGGTAAAGGGT	2	query_pA_signal_upstream_feature	2.7849	103.429	-9	3UTR	PEX2	sense
-	chrX	116567	116583	+	TATCGTCTAGAGTGAT	0	query_pA_signal_upstream_feature	2.33572	2.71083	-21	SUTs	XUT_10R-39	sense
-	chrVIII	461557	461573	-	TGCCGTATAGTATGAC	1	query_pA_signal_upstream_feature	9.17512	4.58756	-10	CUTs	CUT656	sense
-	chrVIII	420165	420181	-	TGGAGTTTATATTGTT	2	query_pA_signal_upstream_feature	3.33641	1.6682	-28	3UTR	INT_0_4352	sense
-	chrVIII	227283	227299	-	CTTCGTCGAATGTGAT	1	query_pA_signal_upstream_feature	21.6866	10.8433	-10	intergenic_region	INT_0_4205	sense
-	chrVIII	34292	34308	-	TCCCGTCCCAGGTGAC	1	query_pA_signal_upstream_feature	7.92397	3.96198	-16	intergenic_region	INT_0_4044	sense
+	chrVIII	77428	77444	-	TTGCATGATTCTTGAT	1	query_pA_signal_upstream_feature	12.0945	6.04724	-21	CUTs	CUT172	sense
+	chrVIII	462159	462175	+	TTCCGTCTCGTGTGCT	1	query_pA_signal_upstream_feature	12.5115	6.25576	-15	CUTs	CUT182	sense
-	chrVIII	341621	341637	+	GGCCGTAAACAGTGAT	1	query_pA_signal_upstream_feature	2.91936	1.45968	-15	5UTR	DMA1	sense
+	chrVIII	281347	281363	+	GTTCGTCACACATGAT	1	query_pA_signal_upstream_feature	3.15973	63.8088	-9	3UTR	RTC3	sense
+	chrVII	131385	131401	-	TAACGACTTTATTGAG	2	query_pA_signal_upstream_feature	5.83871	2.91936	-20	3UTR	INT_0_3286	sense
+	chrVII	806190	806206	+	TTCCGTATCTAGCGAT	1	query_pA_signal_upstream_feature	5.83931	5.42166	-16	CUTs	CUT158	sense
+	chrVII	548298	548314	+	TTACAGTAACGGTGAT	2	query_pA_signal_upstream_feature	2.91936	1.45968	-29	CDS	GSC2	sense
-	chrVII	739262	739278	+	TGTGGTCCTTCCTGCT	2	query_pA_signal_upstream_feature	17.9332	8.96659	-18	CUTs	INT_0_3751	sense
-	chrVII	423213	423229	+	TTCCATTTAAAATGAT	1	query_pA_signal_upstream_feature	11.2604	5.63019	-19	XUTs	INT_0_3507	sense
-	chrVII	31778	31794	+	ATTCGTGGTACATGAT	1	query_pA_signal_upstream_feature	5.39013	8.75807	-23	XUTs	INT_0_3211	sense
+	chrVII	36861	36877	+	TTCCATTATTATTGAT	1	query_pA_signal_upstream_feature	2.13894	10.4263	-13	3UTR	PDE1	sense
-	chrV	302568	302584	-	ATACGTGCTCAAAGAT	2	query_pA_signal_upstream_feature	16.1704	22.5207	-28	CUTs	CUT560	sense
+	chrV	509982	509998	-	TTTCGTTAAACATGAT	0	query_pA_signal_upstream_feature	4.17051	2.08525	-16	3UTR	INT_0_2948	sense
-	chrV	51709	51725	+	GGCCGGGTAAAATGAT	2	query_pA_signal_upstream_feature	243.558	121.779	-10	CUTs	INT_0_2564	sense
+	chrV	374841	374857	+	CATCGTAAATCATGAT	1	query_pA_signal_upstream_feature	4.17051	2.08525	-13	intergenic_region	INT_0_2848	sense
+	chrIX	244615	244631	-	ACTTGTTGTCTATGAT	2	query_pA_signal_upstream_feature	5.42166	2.71083	-26	intergenic_region	INT_0_2361	sense
+	chrIX	379930	379946	+	TATCGTCGTTAACGAT	1	query_pA_signal_upstream_feature	7.08986	3.54493	-23	3UTR	SQT1	sense
-	chrIX	148952	148968	+	TTTTTTCTCTTTTGAT	2	query_pA_signal_upstream_feature	4.19232	5.83871	-9	3UTR	INT_0_2281	sense
-	chrIV	1003821	1003837	-	TATCTTGTTTTGTGTT	2	query_pA_signal_upstream_feature	8.34102	4.17051	-26	intergenic_region	INT_0_1783	sense
+	chrIV	682031	682047	-	TCACGTGATCCGAGCT	2	query_pA_signal_upstream_feature	7.08986	3.54493	-7	antisense_CDS	INT_0_1564	sense
+	chrIV	199833	199849	-	CCCCGTGGCAAGTGAT	1	query_pA_signal_upstream_feature	6.25576	3.12788	-19	intergenic_region	INT_0_1195	sense
+	chrIV	977363	977379	-	TGTCGTAGAAAAAGAC	2	query_pA_signal_upstream_feature	4.17051	2.08525	-14	SUTs	XUT_4F-447	sense
+	chrIV	1031772	1031788	-	TGGCGTATACTGCTAT	2	query_pA_signal_upstream_feature	4.49178	4.17051	-26	intergenic_region	INT_0_1807	sense
+	chrIV	453991	454007	-	TCTCATTAGTAATTAT	2	query_pA_signal_upstream_feature	6.17619	11.4689	-27	CUTs	CUT061	sense
+	chrIV	618451	618467	+	TCTCGTGCTCCGTGAC	1	query_pA_signal_upstream_feature	2.85631	25.8572	-30	XUTs	XUT_4F-306	sense
-	chrIV	272048	272064	+	CATCGTCCGAAGTGAT	1	query_pA_signal_upstream_feature	25.0231	12.5115	-16	5UTR	PHO2	sense
-	chrIV	392621	392637	+	CATCGTATAAGGTGAT	1	query_pA_signal_upstream_feature	6.88739	9.59217	-14	3UTR	SLM3	sense
+	chrIV	431608	431624	+	TCACGATGCCGCTGAT	1	query_pA_signal_upstream_feature	21.2696	10.6348	-25	intergenic_region	INT_0_1380	sense
-	chrIV	1293252	1293268	+	ATTCGTCTTGAGTGAT	1	query_pA_signal_upstream_feature	3.69324	7.71544	-19	3UTR	INT_0_1992	sense
+	chrIV	304953	304969	+	ACTCGTTAACAGTGAT	1	query_pA_signal_upstream_feature	4.58756	2.29378	-30	3UTR	NDE2	sense
-	chrIV	1489177	1489193	+	TAGCGTTCAAAATGAC	1	query_pA_signal_upstream_feature	3.21517	28.3595	-15	3UTR	CUT538	sense
-	chrIV	1213685	1213701	+	AATCATTCTCACTGAT	2	query_pA_signal_upstream_feature	7.08986	3.54493	-6	intergenic_region	INT_0_1932	sense
-	chrIII	176629	176645	-	TTTCGTAGCCCGTGAT	0	query_pA_signal_upstream_feature	8.0852	5.63019	-10	5UTR	SYP1	sense
-	chrII	768099	768115	-	ATCCGTGAAACGTGAT	1	query_pA_signal_upstream_feature	4.58756	2.29378	-7	intergenic_region	INT_0_774	sense
-	chrII	535079	535095	+	TTACGTATAAAATGAT	0	query_pA_signal_upstream_feature	7.08986	3.54493	-15	intergenic_region	INT_0_589	sense
-	chrII	782448	782464	+	CATCGTGTTATACGAT	2	query_pA_signal_upstream_feature	7.92397	3.96198	-13	intergenic_region	INT_0_783	sense
-	chrII	100269	100285	+	CTTCGTACGAGATGAG	2	query_pA_signal_upstream_feature	2.05338	60.0553	-13	3UTR	INT_0_276	sense

## Sheet: Reb1p_passive_PATs_upstream
cluster peak strand	cluster peak chromosome	motif start	motif end	motif_strand	motif_sequence	mismatches from consensus	category	criteria for calling site	total cluster signal	distance from motif boundary to cluster peak (bp)	type of region	gene name	gene strand
+	chrIX	165897	165904	+	TTACCCG	0	flanking_window_reference_pA_signal	[0, 0, 0, 0, 0, 0, 0, 0, 0, 0, 0, 0, 0, 0, 0, 0, 0, 0.232119110529, 0, 0, 0, 0, 0.232119110529, 0, 0, 0, 0.232119110529, 0.464238221058, 0, 0, 0, 0, 0, 0, 0, 0, 0, 0, 0, 0, 0, 0, 0, 0, 0, 0, 0, 0, 0, 0, 0, 0, 0, 0, 0, 0, 0, 0, 0, 0, 0, 0, 0, 0, 0, 0, 0, 0, 0, 0, 0, 0, 0, 0, 0, 0, 0]	0	-3	XUTs	XUT_9F-71	sense
+	chrX	295065	295072	+	TTACCCG	0	flanking_window_reference_pA_signal	[0, 0, 0.464238221058, 0.232119110529, 0.232119110529, 1.6248337737, 7.19569242639, 15.3198612949, 0, 1.85695288423, 1.6248337737, 10.4453599738, 0, 0, 1.85695288423, 1.85695288423, 0, 0.464238221058, 0, 0.232119110529, 0, 0, 1.6248337737, 0.696357331587, 0, 0, 0.232119110529, 0, 0, 0, 0, 0.464238221058, 0, 0.232119110529, 0, 0, 0, 0, 0, 0, 0.928476442115, 0, 0, 0, 0.232119110529, 0, 0, 0, 0, 1.6…	67.5622	-23	3UTR	YJL077W-A	sense
-	chrX	450790	450797	+	TTACCCG	0	flanking_window_reference_pA_signal	[0, 0, 0, 0, 0, 0, 0, 2.78542932635, 0, 4.17814398952, 0, 0, 0, 0, 0, 0.464238221058, 0, 0, 0.464238221058, 0, 0, 0, 0, 0, 0, 0, 0, 0, 0, 0, 0, 0, 0, 0, 0, 0, 0, 0, 0, 0, 0, 0, 0, 0, 0, 0, 0, 0, 0, 0, 0, 0, 0, 0, 0, 0, 0, 0, 0, 0, 0, 0, 0, 0, 0, 0, 0, 0, 0, 0, 0, 0, 0, 0, 0, 0, 0]	0	38	intergenic_region	INT_0_4798	sense
+	chrII	111294	111301	+	TTACCCG	0	flanking_window_reference_pA_signal	[0, 0, 0, 0, 0, 0, 0, 0, 0, 0, 0.696357331587, 0, 0.232119110529, 0.928476442115, 0.464238221058, 1.85695288423, 0, 0, 2.32119110529, 0, 0, 0, 2.08907199476, 0, 1.16059555264, 0, 0, 0.464238221058, 0.232119110529, 0, 0.232119110529, 7.42781153692, 0, 0, 0, 0, 0, 0.464238221058, 0, 0, 0.464238221058, 0, 0, 0, 0, 0, 0, 0, 0, 0, 0, 0, 0, 0, 0, 0, 0, 0, 0, 0, 0, 0, 0, 0, 0, 0, 0, 0, 0, 0, 0, 0, 0, 0,…	8.75807	1	3UTR	SHP1	sense
-	chrII	565524	565531	+	TTACCCG	0	flanking_window_reference_pA_signal	[0, 0, 0, 0, 0, 0, 0, 0, 0.232119110529, 2.32119110529, 0, 0, 6.73145420534, 0, 0, 49.6734896532, 0, 0, 35.2821048004, 0, 0, 6.26721598428, 0, 0, 21.3549581687, 0, 0, 8.12416886851, 63.6006362849, 0, 47.8165367689, 0, 0, 1.16059555264, 5.80297776322, 23.4440301634, 0, 16.7125759581, 43.6383927794, 0, 17.6410524002, 134.629084107, 0, 2.08907199476, 1.6248337737, 1.39271466317, 0.696357331587, 1.16…	0	6	intergenic_region	INT_0_610	sense
-	chrI	39092	39099	+	TTACCCG	0	flanking_window_reference_pA_signal	[0, 0, 0.928476442115, 0, 0, 0, 0, 0, 0.696357331587, 0, 0, 0.232119110529, 0, 0, 0, 0, 0, 0.232119110529, 0, 0, 0.232119110529, 0, 0, 0, 0, 0, 0, 0, 0, 0, 0, 0, 0, 0, 0.464238221058, 0, 0, 0.232119110529, 0, 0, 0, 0.464238221058, 0, 0, 0, 0, 0, 0, 0, 0, 0.464238221058, 1.6248337737, 0, 0, 0, 0, 0, 0, 0, 0, 0, 0, 0, 0, 0, 0, 0, 0, 0, 0, 0.464238221058, 0, 0, 0.464238221058, 0, 0, 0]	0	-4	intergenic_region	INT_0_80	sense
-	chrXV	574899	574906	-	TTACCCG	0	flanking_window_reference_pA_signal	[0, 2.32119110529, 3.71390576846, 0, 0, 2.08907199476, 0, 0, 0, 0, 0, 0, 0, 0, 0, 0, 0, 0.464238221058, 0.928476442115, 0.696357331587, 19.9622435055, 0.464238221058, 0.232119110529, 0, 3.48178665793, 0, 0, 0.232119110529, 0, 0.696357331587, 0, 0, 0, 0, 0.696357331587, 0, 0, 0, 0, 0, 0, 0, 0, 0, 0.232119110529, 0, 0, 0, 0, 0, 0, 0, 0, 0, 0, 0, 0, 0, 0.232119110529, 2.08907199476, 0, 0.69635733158…	0	27	intergenic_region	INT_0_8015	sense
+	chrXV	144068	144075	+	TTACCCG	0	flanking_window_reference_pA_signal	[0, 0.232119110529, 0, 0, 0, 0, 0, 0, 0, 0, 0, 0.232119110529, 0.464238221058, 2.78542932635, 0, 0, 0, 0, 0, 0, 0, 0, 0, 0, 0, 2.08907199476, 0, 0, 0, 0, 0.232119110529, 4.87450132111, 0, 0, 0, 0, 0, 0.464238221058, 0, 0, 0, 0, 0.464238221058, 0, 0, 0, 0, 0, 0, 0.232119110529, 2.08907199476, 0, 0, 0, 0, 0, 0, 0, 0.232119110529, 0, 0, 0, 0, 0, 0, 0.232119110529, 0, 0, 0, 0, 0, 0, 0, 0, 0, 0, 0]	6.25576	1	3UTR	TRM10	sense
+	chrXIV	387060	387067	-	TTACCCG	0	flanking_window_reference_pA_signal	[0, 0, 0, 0, 0, 0, 0, 0, 0, 0, 0, 0, 0, 0, 0, 0, 0, 0, 0, 0, 0, 0, 0, 0, 0, 0, 0, 0, 0, 0, 0, 0, 0, 0.464238221058, 0, 0, 0, 0, 0, 0, 0, 0, 0, 0, 0.232119110529, 1.16059555264, 0, 0.232119110529, 0, 0, 0, 0.464238221058, 0.928476442115, 0.232119110529, 0.232119110529, 0.232119110529, 0, 0, 0.232119110529, 4.41026310005, 16.9446950686, 0, 0, 0, 0.696357331587, 0, 0, 0, 0, 0, 0, 0, 0, 0, 0, 0, 0]	0	30	3UTR	FAR11	sense
-	chrXIV	332297	332304	-	TTACCCG	0	flanking_window_reference_pA_signal	[1.85695288423, 0.232119110529, 0.464238221058, 0.232119110529, 0.232119110529, 1.16059555264, 0, 0.696357331587, 2.78542932635, 0, 0, 0, 0, 0, 0, 0, 0, 0, 0, 0, 0, 0, 0.464238221058, 0, 0, 0, 0, 0, 0, 0, 0, 0.464238221058, 0, 0, 0, 0, 0, 0, 0, 0, 0, 0, 0, 0, 0, 0, 0, 0, 0, 0, 0, 0, 0, 0, 0, 0, 0, 0.232119110529, 0, 0, 0, 0, 0, 0, 0, 0.696357331587, 0, 0, 0, 0, 0, 0, 0, 0, 0, 0, 0]	1.04263	39	intergenic_region	INT_0_7197	sense
-	chrXIV	485426	485433	-	TTACCCG	0	flanking_window_reference_pA_signal	[0, 0.928476442115, 1.39271466317, 0, 0, 0, 0, 0, 0, 0, 0, 0, 0, 0, 0, 0, 0, 0, 0, 0, 0.232119110529, 0, 0, 0.232119110529, 0.232119110529, 0, 0, 0, 0, 0, 0, 0.232119110529, 0, 0, 0, 0, 0, 0, 0, 0, 0, 0, 0, 0.232119110529, 0, 0, 0, 0, 0, 0, 0, 0, 0, 0, 0, 0, 0, 0, 0, 0, 0, 0, 0, 0, 0, 0, 0, 0, 0, 0, 0, 0, 0, 0, 0, 0, 0]	0.417051	45	intergenic_region	INT_0_7320	sense
+	chrXIV	456296	456303	+	TTACCCG	0	flanking_window_reference_pA_signal	[0, 0, 0, 0, 0, 0, 0, 0, 0, 0, 0, 0, 0, 0, 0, 0, 0, 0, 0, 0, 0, 0, 0.232119110529, 0, 0.696357331587, 0, 0, 0, 0, 0, 0, 0, 0, 0, 0, 0, 0, 0, 0, 0, 0, 0, 0, 0, 0, 0, 0, 0, 0, 0, 0, 0, 0, 0, 0, 0, 0, 0, 0, 0, 0, 0, 0, 0, 0, 0, 0, 0, 0, 0, 0, 0, 0, 0, 0, 0.232119110529, 0]	1.25115	-6	intergenic_region	INT_0_7297	sense
+	chrXIV	37537	37544	+	TTACCCG	0	flanking_window_reference_pA_signal	[0, 0, 0, 0, 0, 0, 0, 0.464238221058, 0.464238221058, 0, 0, 0, 0, 0, 0, 0, 0, 0, 0.232119110529, 0, 0, 0, 0, 0, 0, 0, 0.232119110529, 0.696357331587, 0, 0, 0, 0, 0, 0, 0, 0.232119110529, 1.85695288423, 8.58840708957, 0, 0, 0.696357331587, 2.55331021582, 0, 0.232119110529, 8.35628797904, 0, 1.6248337737, 16.9446950686, 0, 0, 0, 0, 0.232119110529, 0, 0, 0.232119110529, 0.696357331587, 9.28476442115…	0.834102	17	3UTR	VNX1	sense
+	chrXIII	514017	514024	-	TTACCCG	0	flanking_window_reference_pA_signal	[0, 0, 0, 0, 0, 0, 0, 0, 0, 0, 0.464238221058, 0.464238221058, 0, 2.08907199476, 5.57085865269, 0, 0.696357331587, 0, 0.232119110529, 1.6248337737, 0, 2.08907199476, 0, 0.928476442115, 0, 0.232119110529, 0, 0, 0, 1.39271466317, 0, 0, 0, 4.17814398952, 6.96357331587, 0, 0, 0, 0, 0, 0, 0.232119110529, 0, 0.232119110529, 0.232119110529, 0, 0, 0.232119110529, 0.232119110529, 13.4629084107, 38.5317723…	10.4263	31	3UTR	PKR1	sense
-	chrXIII	266965	266972	-	TTACCCG	0	flanking_window_reference_pA_signal	[0, 0, 0, 0, 0, 0, 0, 0.928476442115, 0, 0, 0, 0, 0, 0, 0, 0.232119110529, 0, 0, 0, 0.232119110529, 0, 0, 0, 0, 0, 0, 0, 0, 0, 0, 0, 0, 0, 0, 0, 0, 0, 0, 0, 0, 0, 0, 0, 0, 0, 0, 0, 0, 0, 0, 0, 0, 0, 0, 0, 0, 0, 0, 0, 0, 0, 0, 0, 0, 0, 0, 0, 0, 0, 0, 0, 0, 0, 0, 0, 0, 0]	1.6682	40	SUTs	XUT_13R-114	sense
-	chrXIII	695214	695221	+	TTACCCG	0	flanking_window_reference_pA_signal	[0, 0, 0, 0, 0, 0, 0, 0.232119110529, 1.16059555264, 0, 0, 0, 2.55331021582, 0, 0.232119110529, 5.33873954216, 0, 0, 0, 0.696357331587, 0, 0, 0, 0, 0.232119110529, 0, 0, 0, 0, 0, 0, 0.232119110529, 0, 0.232119110529, 0, 0, 0, 0, 0.464238221058, 0, 0, 0.464238221058, 0, 0, 0, 0, 0, 0.232119110529, 0, 0, 0.232119110529, 1.16059555264, 0, 0, 0, 0, 0, 0, 0, 0, 0, 0, 0, 0, 0, 0, 0, 0, 0, 0, 0, 0, 0, 0…	0.625576	32	intergenic_region	INT_0_6797	sense
-	chrXIII	564282	564289	+	TTACCCG	0	flanking_window_reference_pA_signal	[0, 0, 0, 0.464238221058, 0, 0.464238221058, 0, 0, 0, 0, 0, 0, 0.928476442115, 0, 0, 4.41026310005, 0, 0, 0, 0, 0.232119110529, 0.464238221058, 3.71390576846, 7.19569242639, 15.3198612949, 0, 3.48178665793, 29.4791270372, 0, 0.464238221058, 0, 0, 0, 0, 0, 0, 0, 0, 0, 0, 0, 0, 0, 0, 0, 0, 0, 0, 0, 0, 0, 0, 0, 0, 0, 0, 0, 0, 0, 0, 0, 0, 0, 0, 0, 0, 0, 0, 0, 0, 0, 0, 0, 0, 0, 0, 0]	0.208525	20	3UTR	INT_0_6696	sense
+	chrXIII	545796	545803	+	TTACCCG	0	flanking_window_reference_pA_signal	[0, 0, 0, 0, 0, 0, 0, 0, 0, 0, 0, 0, 0, 1.85695288423, 0, 0, 0, 0.232119110529, 0, 0, 0, 0, 0, 0.696357331587, 0, 0, 0, 0, 3.48178665793, 0, 1.16059555264, 13.6950275212, 0, 0, 0.232119110529, 0, 0, 0.232119110529, 0.696357331587, 1.85695288423, 0, 0, 0, 0, 0, 0.232119110529, 0, 0.232119110529, 1.16059555264, 0, 0, 0, 0, 0, 0, 0.464238221058, 0.464238221058, 0, 0, 0.232119110529, 0, 0.69635733158…	2.29378	1	3UTR	CIN4	sense
+	chrIV	88115	88122	-	TTACCCG	0	flanking_window_reference_pA_signal	[0, 0, 0, 0, 0, 0, 0, 0, 0, 1.16059555264, 0, 0.464238221058, 7.65993064745, 0, 0, 0, 0, 0, 0, 0.464238221058, 2.08907199476, 22.5155537213, 169.446950686, 206.12177015, 0, 5.10662043163, 0, 3.94602487899, 0.928476442115, 8.35628797904, 10.6774790843, 2.08907199476, 1.39271466317, 17.8731715107, 36.9069385741, 0, 0, 0.696357331587, 0, 0, 0, 0.232119110529, 0, 0.464238221058, 0, 1.16059555264, 0, …	290.267	-7	3UTR	NHP2	sense
+	chrIV	501675	501682	-	TTACCCG	0	flanking_window_reference_pA_signal	[0, 0, 0, 0, 0, 0, 0, 0, 0, 0, 0, 0, 0, 0, 0.232119110529, 0, 0, 0, 0, 0, 0, 0, 0, 0, 0, 0, 0, 0, 0, 0, 0, 0, 0, 0, 0, 0, 0, 0, 0, 0.232119110529, 0, 0, 0, 0, 0, 0.232119110529, 0, 0, 0, 0, 0, 0, 0, 0, 0, 4.41026310005, 0, 0, 0.232119110529, 3.2496675474, 0, 0.232119110529, 0, 0, 0, 0, 0, 0, 0, 0, 0, 0.464238221058, 0, 0, 0.232119110529, 0, 0]	1.25115	25	CUTs	XUT_4F-248	sense
+	chrIV	372100	372107	-	TTACCCG	0	flanking_window_reference_pA_signal	[0, 0, 0, 0, 0, 0, 0, 0, 0, 0, 0, 0, 0, 0, 0, 0, 0, 0, 0, 0, 0, 0, 0, 0, 0, 0, 0, 0.232119110529, 0, 0, 0, 0, 0, 0, 0, 0, 0, 0, 0, 0, 0, 0, 0, 0, 0, 0, 0, 0, 0, 0, 0.232119110529, 0, 0, 0, 0, 0, 0, 0, 0, 0, 0, 0, 0, 0, 0, 0.232119110529, 0, 0, 0.928476442115, 0, 0, 0, 0, 0.464238221058, 0, 0, 0]	0.834102	38	3UTR	INT_0_1330	sense
+	chrIV	38356	38363	-	TTACCCG	0	flanking_window_reference_pA_signal	[0, 0, 0, 0, 0, 0, 0, 0, 0, 0.464238221058, 0, 0, 0.928476442115, 25.7652212687, 0, 0, 3.48178665793, 0, 3.71390576846, 0, 1.16059555264, 0, 1.6248337737, 7.89204975798, 0, 0, 0, 0, 0, 0, 0, 0, 0, 0, 0.232119110529, 0, 0, 0, 0, 0, 0, 0, 0, 0, 0, 0, 0, 0, 0, 0, 0, 0, 0, 0, 0, 0, 0, 0, 0, 0, 0, 0, 0, 0, 0, 0, 0, 0, 0, 0, 0, 0, 0, 0, 0, 0, 0]	81.5334	-17	3UTR	YDL233W	sense
+	chrIV	1369558	1369565	+	TTACCCG	0	flanking_window_reference_pA_signal	[0, 0, 0, 0, 0, 0, 0, 0, 0, 0, 0, 0, 0, 0, 0, 0, 0, 0.232119110529, 0, 0, 0, 0, 0, 0, 0, 0, 0, 0, 0, 0, 0, 1.39271466317, 0, 0, 0, 0, 0, 0, 0, 0, 0, 0, 0, 0, 0, 0, 0, 0, 0, 0, 0, 0, 0, 0, 0, 0, 0, 0, 0, 0, 0, 0, 0, 0, 0, 0, 0, 0, 0, 0, 0, 0, 0, 0, 0, 0, 0]	1.04263	1	3UTR	NHX1	sense
+	chrIV	399205	399212	+	TTACCCG	0	flanking_window_reference_pA_signal	[0, 0, 0, 0, 0, 0.232119110529, 0, 0, 0, 0.232119110529, 0.232119110529, 0, 0, 0.232119110529, 0, 0, 2.08907199476, 0, 0, 4.64238221058, 0, 0, 0.928476442115, 3.94602487899, 0, 0.232119110529, 0, 0, 3.01754843688, 0, 0.232119110529, 1.85695288423, 0, 0, 0.464238221058, 0.464238221058, 0.464238221058, 0.696357331587, 0, 0.464238221058, 1.85695288423, 7.42781153692, 39.2281296794, 0, 19.0337670634,…	8.96659	12	3UTR	PRP9	sense
-	chrIV	1322072	1322079	+	TTACCCG	0	flanking_window_reference_pA_signal	[0, 0, 0, 0, 0, 0.928476442115, 0, 1.6248337737, 0, 0, 0, 2.08907199476, 0, 0, 0, 0.232119110529, 0, 0, 0.696357331587, 0.928476442115, 1.85695288423, 0, 0, 0.464238221058, 0, 0, 0, 0, 0, 0, 0, 0, 0, 0, 0, 0, 0, 0, 0, 0, 0, 0, 0, 0, 0, 0, 0, 0, 0, 0, 0, 0, 0, 0, 0, 0, 0, 0, 0, 0, 0, 0, 0, 0, 0, 0, 0, 0, 0, 0, 0, 0, 0, 0, 0, 0, 0]	0.208525	36	intergenic_region	INT_0_2014	sense
-	chrVIII	443629	443636	-	TTACCCG	0	flanking_window_reference_pA_signal	[0, 0, 0, 0.464238221058, 0, 0, 0, 0, 0, 0, 0, 0, 0, 0.232119110529, 1.16059555264, 0, 0, 0, 0, 0, 2.32119110529, 0, 0, 0, 1.16059555264, 0, 0, 0, 0.696357331587, 0, 1.16059555264, 0, 0, 0.464238221058, 4.17814398952, 0, 0, 0.464238221058, 1.39271466317, 0, 0, 0, 0, 2.32119110529, 5.33873954216, 0, 0, 0, 0.464238221058, 3.01754843688, 0, 0, 0, 0.232119110529, 0, 0, 0, 0, 0, 0.232119110529, 0.4642…	0	3	intergenic_region	INT_0_4364	sense
+	chrVIII	160609	160616	+	TTACCCG	0	flanking_window_reference_pA_signal	[0, 2.32119110529, 0, 0, 0, 0.464238221058, 2.78542932635, 2.55331021582, 36.6748194636, 0, 10.6774790843, 97.2579073116, 0, 5.33873954216, 6.96357331587, 16.0162186265, 45.7274647742, 34.5857474688, 0, 0.928476442115, 1.6248337737, 5.33873954216, 0.464238221058, 0.928476442115, 12.5344319686, 0, 1.85695288423, 31.8003181425, 1.85695288423, 0, 0.464238221058, 8.12416886851, 0, 0.232119110529, 0, …	258.989	-19	3UTR	THR1	sense
-	chrXVI	667526	667533	-	TTACCCG	0	flanking_window_reference_pA_signal	[0, 0, 0, 0, 0.696357331587, 0.232119110529, 0, 0, 0.232119110529, 0, 0, 0, 0, 0, 0, 0, 0, 0, 0, 0, 0, 0, 0, 0, 0, 0, 0, 0, 0, 0, 0, 0, 0, 0, 0, 0, 0, 0, 0, 0, 0, 0, 0, 0, 0, 0, 0, 0, 0, 0, 0, 0, 0, 0, 0, 0, 0, 0, 0, 0, 0, 0, 0, 0, 0, 0, 0, 0, 0, 0, 0, 0, 0, 0, 0, 0, 0]	0	43	intergenic_region	INT_0_8895	sense
-	chrXVI	205083	205090	-	TTACCCG	0	flanking_window_reference_pA_signal	[0, 0, 0, 0, 0.464238221058, 8.8205262001, 0, 0, 0, 0, 0, 0.232119110529, 0.464238221058, 0, 0, 0, 2.08907199476, 5.57085865269, 0, 0.232119110529, 24.3725066055, 0, 0, 0, 0, 0.696357331587, 0, 0.232119110529, 0, 0, 0, 0, 0, 0, 0, 0, 0, 0, 0.232119110529, 0, 0, 0, 0, 0, 0, 0, 0, 0, 0, 0, 0, 0, 0, 0, 0, 0, 0, 0, 0, 0, 0.232119110529, 0, 0, 0, 0, 0, 0, 0, 0, 0, 0, 0, 0, 0, 0, 0, 0]	1.25115	27	intergenic_region	INT_0_8554	sense
+	chrXVI	108355	108362	+	TTACCCG	0	flanking_window_reference_pA_signal	[0, 0, 0, 0, 0.464238221058, 0, 0, 0, 0, 0, 0, 0.232119110529, 0, 0, 0, 0, 0, 0, 0, 0, 0, 0, 0, 0, 0, 0, 0, 0, 0, 0, 0, 0.232119110529, 0, 0, 0, 0, 0, 0.232119110529, 0, 0, 0, 0, 0.696357331587, 0, 0, 0, 0, 0, 0, 0, 0, 0, 0, 0, 0, 0, 0, 0, 0, 0, 0, 0, 0, 0, 0, 0, 0, 0, 0, 0, 0, 0, 0, 0, 0, 0, 0]	0.625576	12	3UTR	INT_0_8474	sense
-	chrXVI	100309	100316	+	TTACCCG	0	flanking_window_reference_pA_signal	[0.232119110529, 0, 0, 0, 0, 0, 0, 0, 1.39271466317, 0, 1.16059555264, 0, 0, 0, 3.71390576846, 7.19569242639, 16.248337737, 0, 0, 0.232119110529, 0.696357331587, 6.03509687375, 0, 0, 0.464238221058, 2.08907199476, 0, 0, 0, 0, 0, 0, 0.464238221058, 1.39271466317, 0, 0, 0, 0.464238221058, 13.6950275212, 0, 0.696357331587, 3.48178665793, 0, 0, 0.232119110529, 0.232119110529, 0, 0, 0, 0, 0, 0, 0, 0, …	0.417051	31	3UTR	INT_0_8464	sense
-	chrXVI	648472	648479	+	TTACCCG	0	flanking_window_reference_pA_signal	[0, 0.232119110529, 0, 0.232119110529, 0, 1.16059555264, 0, 0.696357331587, 0, 0.232119110529, 3.71390576846, 0, 6.49933509481, 0, 0.232119110529, 0, 0, 2.08907199476, 0, 0, 0, 0, 0.232119110529, 0, 0, 0, 1.16059555264, 8.35628797904, 0, 0, 0, 0, 0, 0, 0, 0, 0.232119110529, 0.464238221058, 0.232119110529, 0, 0.464238221058, 3.2496675474, 0, 0, 0, 0.232119110529, 0, 0, 0, 0, 0, 0.696357331587, 0.4…	0	20	intergenic_region	INT_0_8880	sense
+	chrXVI	32895	32902	+	TTACCCG	0	flanking_window_reference_pA_signal	[0, 0, 0, 0, 0, 0, 0, 0, 0, 0, 0, 0.464238221058, 0, 0, 0, 0, 0, 0, 0, 0, 0, 0, 1.85695288423, 0, 0, 0, 0, 0.232119110529, 5.33873954216, 0, 0.232119110529, 9.05264531063, 0, 0.232119110529, 0.232119110529, 16.0162186265, 14.1592657423, 0, 0, 0, 0, 0, 0, 0.696357331587, 0, 0, 0, 0, 0, 0.232119110529, 0, 0, 0, 0, 0, 0.696357331587, 0, 0.232119110529, 0, 0, 0, 0, 0, 0, 0, 0, 0, 0, 0, 0, 0, 0, 0.232…	1.45968	5	3UTR	MDL2	sense
+	chrIII	213948	213955	-	TTACCCG	0	flanking_window_reference_pA_signal	[0, 0, 0, 0, 0, 0.928476442115, 0, 0, 0, 0.232119110529, 0, 0, 0, 0, 0, 0.232119110529, 1.16059555264, 0, 0, 0, 0.464238221058, 0, 0.928476442115, 3.01754843688, 0, 0, 0.232119110529, 0, 0, 0, 0, 0, 0, 0, 0.928476442115, 0, 0, 3.2496675474, 0, 0.928476442115, 0, 0, 0.232119110529, 0.928476442115, 0.232119110529, 0.696357331587, 0.464238221058, 0, 0, 0.928476442115, 0, 0, 0, 0, 0, 0.464238221058, …	6.25576	7	3UTR	ARE1	sense
-	chrVII	1031670	1031677	-	TTACCCG	0	flanking_window_reference_pA_signal	[0.464238221058, 0, 0.232119110529, 0.928476442115, 0, 0, 0, 0.232119110529, 1.85695288423, 0, 0, 0, 0.232119110529, 1.16059555264, 0, 0, 0.232119110529, 0, 0, 0, 0, 0, 0, 0, 0, 0, 0, 0, 0, 0, 0, 1.39271466317, 0, 0, 0, 0, 0, 0, 0, 0, 0, 0, 0, 0, 0, 0, 0, 0, 0, 0, 0, 0, 0, 0, 0, 0, 0, 0, 0, 0, 0, 0, 0, 0, 0, 0, 0, 0, 0, 0, 0, 0, 0, 0, 0, 0, 0]	0	39	intergenic_region	INT_0_3980	sense
-	chrVII	513031	513038	-	TTACCCG	0	flanking_window_reference_pA_signal	[0.232119110529, 0, 0, 0, 0, 0, 0.464238221058, 0, 0, 0, 0, 1.39271466317, 0, 0, 0, 0, 0, 0, 0, 0, 0.232119110529, 0, 0, 0, 0, 0, 0, 0, 0, 0, 0, 0, 0, 0, 0, 0, 0, 0, 0, 0, 0, 0, 0, 0, 0, 0, 0, 0, 0, 0, 0, 0, 0, 0, 0, 0, 0, 0.232119110529, 0.232119110529, 0, 0, 0, 0, 0, 0, 0, 0, 0, 0.232119110529, 0, 0, 0, 0, 0, 0, 0, 0]	0.625576	36	XUTs	XUT_7R-231	sense
+	chrVII	720228	720235	-	TTACCCG	0	flanking_window_reference_pA_signal	[0, 0, 0, 0, 0, 0, 0, 0, 0, 0.232119110529, 0, 0, 0, 0, 0, 0, 0, 0, 0, 0, 0, 0, 0, 10.6774790843, 0, 0, 0, 0, 0, 0, 0, 0, 0, 1.39271466317, 4.64238221058, 0, 0, 5.10662043163, 0, 0.232119110529, 0, 0, 0, 4.87450132111, 8.35628797904, 0, 6.26721598428, 0, 0, 0, 0.464238221058, 0.464238221058, 0.464238221058, 6.49933509481, 0, 0, 0, 0, 0, 0.232119110529, 0, 0.232119110529, 0, 0, 0.464238221058, 0, …	3.96198	-7	3UTR	DAM1	sense
-	chrVII	377317	377324	+	TTACCCG	0	flanking_window_reference_pA_signal	[27.8542932635, 0, 0, 0, 1.6248337737, 0, 0.464238221058, 2.32119110529, 0, 0.232119110529, 1.85695288423, 1.16059555264, 1.16059555264, 0, 0.696357331587, 13.9271466317, 0, 0.696357331587, 2.55331021582, 0, 0.696357331587, 0, 0, 0, 0.464238221058, 0, 0.464238221058, 0, 0, 0, 0, 0, 0, 1.39271466317, 0, 0, 0, 0.928476442115, 0, 0, 0, 1.39271466317, 0, 0, 0, 0, 0, 0, 0, 0, 0, 0, 0, 0, 0, 0, 0, 0, 0…	0	47	intergenic_region	INT_0_3464	sense
+	chrVII	36815	36822	+	TTACCCG	0	flanking_window_reference_pA_signal	[0, 0, 0, 0, 0, 0, 0.232119110529, 0.464238221058, 0, 0.232119110529, 0, 0, 0, 0, 0, 0, 0, 0, 0, 0, 0.232119110529, 0, 0, 0, 0, 0, 0, 0, 4.17814398952, 0, 1.16059555264, 14.1592657423, 0, 0.232119110529, 0, 0.232119110529, 0, 0.232119110529, 7.42781153692, 0, 1.16059555264, 12.0701937475, 0, 0, 1.6248337737, 8.8205262001, 0, 0, 0, 0, 0, 0, 0, 0, 0, 0, 0.232119110529, 0, 0.232119110529, 0.92847644…	5.00461	1	3UTR	PDE1	sense
-	chrVII	217381	217388	+	TTACCCG	0	flanking_window_reference_pA_signal	[0, 0, 3.2496675474, 13.9271466317, 0, 0, 0, 0, 0, 0, 0, 0, 1.85695288423, 0, 0, 0, 0, 0, 0, 0, 0, 0.232119110529, 0, 0.696357331587, 0, 0, 0, 0, 0.928476442115, 1.6248337737, 0, 0, 0, 0, 0, 0.232119110529, 0, 0, 0, 0.464238221058, 0, 0.696357331587, 0, 0, 0, 0, 0, 0.232119110529, 0, 0, 0, 0, 0.232119110529, 0, 0, 0, 0, 0, 0, 0, 0, 0, 0, 0, 0, 0, 0, 0, 0, 0, 0, 0, 0, 0, 0, 0, 0]	0.625576	44	intergenic_region	INT_0_3347	sense
-	chrVII	316664	316671	+	TTACCCG	0	flanking_window_reference_pA_signal	[0, 0, 0, 0, 0, 0, 0, 0, 0, 0.464238221058, 0, 0, 0, 0, 0, 0, 0, 0.232119110529, 0.232119110529, 0, 0, 0, 0, 0, 0, 0, 0.232119110529, 0, 0, 0, 0, 0, 0, 0, 0, 0, 0, 0, 0, 0, 0, 0.232119110529, 0, 0, 0, 0, 0, 0.232119110529, 0, 0, 0, 0, 0, 0, 0, 0, 0, 0, 0, 0, 0, 0, 0, 0, 0, 0, 0, 0, 0, 0, 0, 0, 0, 0, 0, 0, 0]	0.834102	38	intergenic_region	INT_0_3416	sense
+	chrXI	507797	507804	-	TTACCCG	0	flanking_window_reference_pA_signal	[0, 0, 0, 0, 0, 0, 0.464238221058, 0, 0, 0.696357331587, 0.464238221058, 0, 0.928476442115, 0, 0, 1.16059555264, 5.57085865269, 0, 0, 0, 0, 0.232119110529, 14.1592657423, 0, 0.696357331587, 0, 0, 0.232119110529, 0, 0, 0, 0, 0, 0, 0, 0, 0, 0, 0, 0, 0, 0, 0, 0, 0, 0.232119110529, 0, 0, 0, 0, 0, 0, 0, 0, 0, 0, 0, 0, 0, 0, 0, 0, 0, 0, 0, 0, 0, 0, 0, 0, 0, 0, 0, 0, 0, 0, 0]	32.7385	-8	intergenic_region	INT_0_5386	sense
+	chrXI	493760	493767	-	TTACCCG	0	flanking_window_reference_pA_signal	[0, 0, 0, 0, 0, 0, 0, 0, 1.16059555264, 6.49933509481, 0, 24.6046257161, 0, 0, 0.232119110529, 0.232119110529, 1.16059555264, 15.0877421844, 0, 0, 10.2132408633, 0, 2.08907199476, 0, 2.32119110529, 25.9973403792, 0, 1.39271466317, 0, 0, 0, 0, 0, 1.39271466317, 4.17814398952, 0, 0, 0, 0, 0, 0, 0.232119110529, 4.64238221058, 0, 0, 0, 0, 0.464238221058, 1.6248337737, 0, 0, 0, 0, 0, 0, 0, 3.017548436…	53.591	-5	3UTR	BCH2	sense
+	chrXI	178271	178278	-	TTACCCG	0	flanking_window_reference_pA_signal	[0, 0, 0, 0, 0, 0.232119110529, 0, 0, 0, 0, 9.51688353168, 37.1390576846, 0, 0, 0, 0, 13.2307893001, 0, 8.12416886851, 0, 0, 0, 0.464238221058, 0.232119110529, 1.39271466317, 2.78542932635, 0, 0, 0, 0.696357331587, 0, 0, 0, 1.16059555264, 4.87450132111, 0, 0, 1.16059555264, 0, 0, 0, 0.696357331587, 0, 0.232119110529, 1.6248337737, 0, 0, 0, 0, 0, 0, 0, 0, 0, 0, 0, 0.232119110529, 0, 0, 0, 0, 0, 0,…	55.2592	-19	3UTR	LTV1	sense
-	chrXI	174012	174019	+	TTACCCG	0	flanking_window_reference_pA_signal	[0, 0.464238221058, 0, 0.928476442115, 0, 0, 0, 0, 0, 0.232119110529, 0, 0, 0.232119110529, 0, 0, 0, 0, 0, 0, 0, 0, 0, 0, 0, 0, 0, 0, 0, 0, 0, 0, 0, 0, 0, 0, 0, 0, 0, 0, 0, 0, 0, 0, 0, 0, 0, 0, 0, 0, 0, 0, 0, 0, 0, 0, 0, 0, 0, 0, 0, 0, 0, 0, 0, 0, 0, 0, 0, 0, 0, 0, 0, 0, 0, 0, 0, 0]	0.417051	44	intergenic_region	INT_0_5131	sense
-	chrV	196786	196793	-	TTACCCG	0	flanking_window_reference_pA_signal	[0, 0.232119110529, 0, 0, 0, 0, 0, 0, 0, 3.2496675474, 0, 0.232119110529, 0, 0, 0.232119110529, 0, 0, 0, 0, 0.696357331587, 0, 0, 0, 1.16059555264, 0, 0, 0.464238221058, 0, 0.464238221058, 0, 0, 0.464238221058, 1.6248337737, 0, 0, 0.928476442115, 0, 0, 0, 0, 0, 0, 0, 0.232119110529, 0.928476442115, 0, 0, 0, 0, 0, 0, 0, 0, 0, 0, 0, 0, 0, 0, 0, 0, 0.232119110529, 0, 0, 0.232119110529, 0.23211911052…	0.208525	38	intergenic_region	INT_0_2690	sense
-	chrV	128455	128462	-	TTACCCG	0	flanking_window_reference_pA_signal	[0, 0, 0, 0, 0, 0, 0, 0, 0, 0.464238221058, 0, 0, 0, 0, 0.464238221058, 0, 0, 0, 0, 0, 0.232119110529, 0, 0, 1.6248337737, 0, 0, 5.80297776322, 0, 0, 0, 0, 1.39271466317, 6.26721598428, 0.464238221058, 9.05264531063, 0, 0.464238221058, 0.928476442115, 3.2496675474, 1.85695288423, 0, 0, 0, 0.232119110529, 0.464238221058, 0, 0, 0, 0, 0, 0, 0, 0, 0, 0, 0, 0, 0, 0, 0, 0, 0, 0, 0, 0, 0, 0.232119110529…	0	13	CDS	YEL014C	sense
+	chrV	541549	541556	-	TTACCCG	0	flanking_window_reference_pA_signal	[0, 0, 0, 0, 0, 0, 0, 0, 0, 0, 0, 0, 0, 0, 0, 0, 0, 0, 0, 0, 0, 0, 0, 0, 0, 0, 0, 0, 0, 0, 0, 0, 0, 0, 0, 0, 0, 0, 0, 0, 0, 0, 0, 0, 0, 0, 0, 0, 0, 0, 0, 0, 0, 0, 0.232119110529, 1.39271466317, 0, 0, 0, 0, 0.232119110529, 0, 0, 0, 0, 0, 0, 0, 0.232119110529, 0, 0, 0, 0, 0, 0, 0, 0]	0	25	3UTR	YER175W-A	sense
-	chrXII	121210	121217	-	TTACCCG	0	flanking_window_reference_pA_signal	[11.3738364159, 0, 0, 0, 0.696357331587, 16.4804568475, 0, 0, 0, 0.232119110529, 0.232119110529, 0, 0, 0, 0, 0.232119110529, 0.464238221058, 0, 0, 0, 3.48178665793, 21.5870772792, 0, 0.928476442115, 0, 0, 0, 0.232119110529, 0, 0, 0, 0, 0.232119110529, 0, 0.232119110529, 0, 0, 0, 0, 0, 0, 0, 0, 0, 0, 0, 0, 0, 0, 0, 0, 0, 0, 0, 0, 0, 0, 0, 0, 0, 0, 0, 0, 0, 0, 0.232119110529, 0, 0, 0, 0, 0, 0, 0, 0…	0.834102	26	intergenic_region	INT_0_5577	sense
+	chrXII	83417	83424	-	TTACCCG	0	flanking_window_reference_pA_signal	[0, 0, 0, 0, 0, 0, 0, 0, 0, 0, 0, 0, 0, 0, 0, 0, 0, 0, 0, 0, 0, 0, 0, 0, 0, 0, 0, 0, 0, 0, 0, 0, 0, 0, 0, 0, 0, 0, 0, 0, 0, 0, 0, 0, 0, 0, 0, 0, 0, 0, 0, 0, 0, 0, 0, 0, 0, 0, 0, 0, 0, 0, 0.232119110529, 0, 0.232119110529, 0, 0, 0, 0.232119110529, 0, 0, 0, 0, 0.696357331587, 0, 0, 0]	1.25115	43	CDS	FRA1	sense
-	chrXII	208608	208615	+	TTACCCG	0	flanking_window_reference_pA_signal	[0, 0, 1.39271466317, 0, 0, 0.928476442115, 4.87450132111, 0, 0.232119110529, 0, 0.232119110529, 1.85695288423, 0, 0, 0, 0.696357331587, 0, 0, 0, 0, 0, 0, 0, 0, 0.232119110529, 0.232119110529, 0, 0, 0, 0, 0, 0, 0, 0, 0, 0, 0, 0.232119110529, 0, 0, 0, 0, 0, 0, 0, 0, 0, 0, 0, 0, 0, 0, 0, 0, 0, 0, 0, 0, 0, 0, 0, 0, 0, 0, 0, 0, 0, 0, 0, 0, 0, 0, 0, 0, 0, 0, 0]	0.208525	41	intergenic_region	INT_0_5636	sense
-	chrXII	636261	636268	+	TTACCCG	0	flanking_window_reference_pA_signal	[0, 0, 0, 0, 0.232119110529, 5.57085865269, 13.2307893001, 0, 0.232119110529, 0, 1.16059555264, 0.232119110529, 0, 0, 0, 0, 0, 0.232119110529, 1.16059555264, 4.41026310005, 0, 0, 0, 0.696357331587, 0, 0, 0, 0, 0, 0, 0, 0, 0, 0, 0, 0.232119110529, 0.232119110529, 0, 0, 0, 0, 2.32119110529, 0, 0, 0, 0.464238221058, 0, 0, 0, 0, 0, 0, 0, 0, 0, 0, 0, 0, 0, 0, 0, 0, 0, 0, 0, 0, 0, 0, 0, 0, 0, 0, 0, 0, …	0	41	SUTs	SUT700	sense
+	chrXII	559340	559347	+	TTACCCG	0	flanking_window_reference_pA_signal	[0, 0, 0, 0, 0, 0, 0, 0, 0, 0, 0, 0, 0, 0, 0, 0, 0, 0, 0, 0, 0, 0, 0, 0, 0, 0, 0, 0, 3.01754843688, 0, 1.85695288423, 19.0337670634, 0, 0, 0, 0, 6.26721598428, 0, 0, 0, 0, 0, 0, 0, 0.232119110529, 5.10662043163, 0, 0, 0.464238221058, 0, 0, 0, 0, 0.696357331587, 0.696357331587, 0, 0, 0, 0, 0, 0, 0, 0, 0, 0, 0, 0, 0, 0, 0, 0, 0, 0, 0, 0, 0, 0]	0.625576	1	3UTR	HRD3	sense
+	chrIX	27755	27762	+	TTCCCCG	1	flanking_window_reference_pA_signal	[0, 0.232119110529, 0, 0, 0, 0, 0, 0, 0, 0, 0, 0, 0, 0, 0, 0, 0, 0, 0, 0, 0, 0, 0, 0, 0, 0, 0, 0, 0, 0, 0, 0, 0, 0, 0, 0, 0, 0, 0.232119110529, 0, 0, 0, 0, 0, 0, 0, 0, 0, 0, 0.232119110529, 0, 0, 0.464238221058, 0, 0, 0, 0, 0, 0, 0, 0, 0, 0, 0, 0, 0, 0, 0, 0, 0, 0, 0, 0, 0, 0, 0, 0]	1.25115	22	XUTs	XUT_9F-4	sense
-	chrX	705416	705423	-	TCACCCG	1	flanking_window_reference_pA_signal	[0, 0, 0, 0, 0.232119110529, 0, 0, 0, 0, 0, 0, 0, 0, 0, 0, 0, 0.928476442115, 0, 0, 0, 0, 0, 0, 0, 0, 0, 0, 0, 0, 0, 0, 0, 0, 0, 0, 0, 0, 0, 0, 0, 0, 0, 0, 0, 0, 0, 0, 0, 0, 0, 0, 0.696357331587, 0, 0, 0, 0, 0, 0, 0, 0, 0, 0, 0, 0, 0, 0, 0, 0, 0, 0, 0, 0.232119110529, 0, 0.464238221058, 0, 0.232119110529, 0]	0	31	SUTs	SUT650	sense
-	chrX	555753	555760	-	TTACACG	1	flanking_window_reference_pA_signal	[16.7125759581, 0, 0.928476442115, 10.4453599738, 0, 0.232119110529, 0.696357331587, 11.6059555264, 0, 0.696357331587, 24.140387495, 0, 5.80297776322, 0, 0.464238221058, 0.232119110529, 15.3198612949, 0, 0, 0, 1.39271466317, 1.39271466317, 0, 0, 0, 0, 0, 0, 0, 0, 0, 0, 0, 0, 0, 0, 0, 0.232119110529, 0, 0, 0, 0.232119110529, 0, 0, 0.232119110529, 0, 0, 0, 0, 0, 0, 0, 0, 0.232119110529, 0, 0, 0, 0.…	0	37	intergenic_region	INT_0_4878	sense
-	chrX	383680	383687	+	TTACCCT	1	flanking_window_reference_pA_signal	[0, 0, 0, 0, 0, 0, 0, 0.696357331587, 0, 0, 0, 0.232119110529, 0, 0, 0, 0, 0.232119110529, 0, 0, 0, 0, 0, 0, 0, 0.464238221058, 0, 0, 0, 0, 0, 0, 0, 0, 0, 0, 0, 0, 0, 0, 0, 0, 0.928476442115, 0, 0, 0, 0.464238221058, 0, 0.464238221058, 0, 1.16059555264, 0, 0, 0, 0, 0, 0, 0, 0, 0, 0, 0, 0, 0, 0, 0, 0, 0, 0, 0, 0, 0.232119110529, 0, 0, 0, 0, 0, 0]	0	-2	intergenic_region	INT_0_4741	sense
+	chrII	79793	79800	-	TTACCCT	1	flanking_window_reference_pA_signal	[0, 0, 0, 0, 0, 0, 0, 0, 0, 0, 0, 0, 0, 0, 0, 0, 0, 0, 0, 0, 0, 0, 0, 0, 0, 0, 0, 0, 0, 0, 0, 0, 0, 0, 0, 0, 0, 0, 0, 0, 0, 0, 0, 0, 0, 0, 0, 0, 0, 0, 0, 0, 0.232119110529, 0, 0, 0, 0, 0.464238221058, 0, 0, 0, 0, 0, 0, 0, 0, 0, 0, 0.232119110529, 0.696357331587, 0.928476442115, 20.4264817265, 0, 0.696357331587, 25.0688639371, 0, 2.78542932635]	0.208525	44	CDS	NUP170	sense
+	chrII	761094	761101	+	TTACACG	1	flanking_window_reference_pA_signal	[0, 0, 0, 0, 0, 0, 0, 0, 0, 0, 0, 0, 0, 0.464238221058, 2.32119110529, 0, 0, 0, 0, 0, 0, 0, 0.232119110529, 0, 0, 0.464238221058, 0, 0, 0, 0, 0, 0.464238221058, 0, 0, 0, 0, 0.928476442115, 0, 0, 1.16059555264, 0, 0, 0, 0, 0, 0, 0, 0, 0, 0, 0, 0, 0, 0, 0, 0, 0, 0, 0, 0, 0, 0, 0, 0, 0, 0, 0, 0, 0, 0, 0, 0, 0, 0, 0, 0, 0]	1.87673	-16	3UTR	DPB3	sense
-	chrII	392449	392456	+	TTACCCA	1	flanking_window_reference_pA_signal	[0, 0, 0, 0, 0, 0, 0, 0.928476442115, 0, 0, 0, 0, 0.696357331587, 1.6248337737, 0, 0, 0, 0, 0, 0, 0, 0, 0, 0, 0, 0, 0, 0, 0, 0, 0, 0, 0, 0, 0, 0, 0, 0, 0, 0, 0, 0, 0, 0, 0, 0, 0, 0, 0, 0, 0, 0, 0, 0, 0, 0, 0, 0, 0, 0, 0, 0, 0, 0, 0, 0, 0, 0, 0, 0, 0, 0, 0, 0, 0, 0, 0]	0	34	5UTR	SLM4	sense
+	chrII	171166	171173	+	TTATCCG	1	flanking_window_reference_pA_signal	[0, 0, 0, 0, 0, 0, 0, 0, 0, 0, 0, 0, 0, 0, 0.232119110529, 0, 0, 0, 0, 0, 0, 0.232119110529, 0.928476442115, 2.32119110529, 5.10662043163, 0, 9.74900264221, 101.203932191, 0, 0, 2.55331021582, 40.8529634531, 0, 0, 0, 0.232119110529, 0, 0.464238221058, 0, 0, 0, 0, 0, 0, 0, 0, 0.232119110529, 0.232119110529, 0, 0, 0, 0, 0, 1.39271466317, 0, 0, 0, 1.16059555264, 0, 0, 0, 0, 0, 0, 0, 0, 0, 0.23211911…	7.71544	-3	3UTR	RRN10	sense
-	chrVI	123220	123227	-	TTACCCT	1	flanking_window_reference_pA_signal	[0, 0, 0, 0, 0, 0, 0.232119110529, 0.232119110529, 0, 0, 0.928476442115, 0, 0, 1.6248337737, 0, 0, 1.16059555264, 0, 1.85695288423, 12.5344319686, 0, 0, 13.6950275212, 0, 0, 0.232119110529, 0.232119110529, 0.928476442115, 6.26721598428, 0, 0, 0, 0, 0, 0, 0, 0.696357331587, 0.464238221058, 2.55331021582, 0, 0, 0, 0, 0, 1.16059555264, 0, 0, 0.232119110529, 0, 0, 0, 0, 0, 0, 0, 0, 0, 0, 0, 0, 0, 0, …	0	25	intergenic_region	INT_0_3086	sense
+	chrVI	90405	90412	+	TTACCCT	1	flanking_window_reference_pA_signal	[0, 0, 0, 0, 0, 0, 0, 0, 0, 0, 0, 0.464238221058, 0, 0, 0, 0, 0, 0, 0, 0, 0, 0, 0, 0, 0, 0, 0, 0, 0, 0, 0, 0.232119110529, 0, 0, 0, 0, 0, 0, 0, 0, 0, 0, 0, 0.232119110529, 0, 4.87450132111, 0, 0, 0, 0, 0, 0, 0.464238221058, 0, 0.232119110529, 0, 0, 0, 0, 0, 0, 0, 0, 0, 0, 0, 0.464238221058, 0.232119110529, 0, 0, 0, 0, 0, 0, 0, 0, 0]	0.834102	15	SUTs	SUT103	sense
-	chrXV	781639	781646	-	TTACCCT	1	flanking_window_reference_pA_signal	[0, 0.928476442115, 0, 0, 0, 0.464238221058, 0.232119110529, 3.94602487899, 0, 0.232119110529, 2.08907199476, 15.784099516, 0, 0, 0, 0, 0.232119110529, 0.464238221058, 0, 0, 0.232119110529, 0.696357331587, 0, 0, 0, 0, 0, 0, 0, 0.232119110529, 0, 0, 0, 0, 0, 0, 0, 0, 0, 0, 0, 0, 0, 0, 0, 0, 0, 0, 0, 0, 0, 0, 0, 0, 0, 0, 0, 0, 0, 0, 0, 0, 0, 0, 0, 0, 0, 0, 0, 0, 0, 0, 0, 0, 0, 0, 0]	0	36	intergenic_region	INT_0_8164	sense
+	chrXV	357302	357309	-	TGACCCG	1	flanking_window_reference_pA_signal	[0, 0, 0, 0, 0, 0, 0, 0, 0, 0, 0, 0, 0.464238221058, 0, 0, 0, 0.232119110529, 3.2496675474, 0, 0, 3.71390576846, 0, 0, 0, 0.232119110529, 0, 0, 0, 0, 0, 0, 0, 0, 0, 0, 0, 0, 0, 0, 0, 0, 0, 0, 0, 0, 0, 0, 0, 0, 0, 0, 0, 0, 0, 0, 0, 0, 0, 0, 0, 0, 0, 0, 0, 0, 0, 0, 0, 0, 0, 0, 0, 0, 0, 0, 0, 0]	3.33641	-10	3UTR	IRC11	sense
-	chrXV	849517	849524	-	TTCCCCG	1	flanking_window_reference_pA_signal	[0, 0.464238221058, 0, 0, 0, 0.232119110529, 0, 0, 0, 0.232119110529, 1.16059555264, 2.78542932635, 7.65993064745, 0, 0, 0, 0, 0.232119110529, 0.464238221058, 0, 0.464238221058, 0, 0, 0.232119110529, 0, 0, 0, 0, 0, 0, 0, 0, 0, 0, 0, 0, 0, 0, 0, 0, 0, 0, 0, 0, 0, 0, 0, 0, 0.232119110529, 0, 0, 0, 0.928476442115, 0, 0, 0, 0, 0, 0, 0, 0, 0, 0, 0, 0, 0, 0, 0, 0, 0, 0, 0, 0, 0, 0, 0, 0]	0	35	SUTs	XUT_15R-372	sense
-	chrXV	930593	930600	+	TTAACCG	1	flanking_window_reference_pA_signal	[0, 0, 0.232119110529, 3.2496675474, 0, 0, 1.39271466317, 0, 1.39271466317, 7.19569242639, 0, 0.696357331587, 3.2496675474, 0, 4.17814398952, 0, 0, 0.928476442115, 4.17814398952, 0, 0, 0, 0, 1.16059555264, 1.39271466317, 0, 0.232119110529, 0, 0.232119110529, 3.01754843688, 0, 0.696357331587, 0, 12.7665510791, 0, 0, 4.87450132111, 0, 2.32119110529, 0, 3.2496675474, 37.8354150162, 0, 0, 0, 0, 0, 0.…	53.591	6	3UTR	INT_0_8277	sense
-	chrXIV	281656	281663	+	GTACCCG	1	flanking_window_reference_pA_signal	[0, 0, 0, 0, 0, 1.6248337737, 0, 0, 0, 0, 0.232119110529, 0, 0, 0, 0, 0, 0, 0, 0, 0, 0, 0, 0, 0, 0, 0, 0, 0, 0, 0, 0, 0, 0, 0, 0, 0, 0, 0, 0, 0, 0, 0, 0, 0, 0, 0, 0, 0, 0, 0, 0, 0, 0, 0, 0, 0, 0, 0, 0, 0, 0, 0, 0, 0, 0, 0, 0, 0, 0, 0, 0, 0, 0, 0, 0, 0, 0]	0.417051	42	intergenic_region	INT_0_7161	sense
+	chrXIV	96100	96107	+	TTACCCC	1	flanking_window_reference_pA_signal	[0, 0, 0, 0, 0, 0, 0, 0, 0, 0, 0, 0, 0, 0, 0, 0, 0, 0, 0, 0, 0, 0, 0, 0, 0, 0, 0, 0, 0, 0, 0, 0, 0, 0, 0, 0, 0, 3.71390576846, 0, 2.78542932635, 0, 0.232119110529, 0, 0, 0, 0, 0, 0.232119110529, 1.16059555264, 0, 0.232119110529, 0, 0.696357331587, 0, 0, 0, 1.16059555264, 0, 0, 0, 0, 0, 0, 0, 0, 0, 0, 0, 0, 0, 0, 0.464238221058, 0, 0, 0, 0.928476442115, 4.17814398952]	0.208525	46	3UTR	CUS2	sense
-	chrXIV	241459	241466	+	CTACCCG	1	flanking_window_reference_pA_signal	[0, 0, 0.464238221058, 0, 0, 0.232119110529, 0.464238221058, 0.464238221058, 0, 0.232119110529, 0, 0.696357331587, 0, 0.232119110529, 1.16059555264, 1.85695288423, 0, 0.232119110529, 0, 0, 0.232119110529, 0.232119110529, 0, 0, 0, 0, 0, 0, 0, 0, 0, 0, 0, 0, 0, 0, 0, 0, 0, 0, 0, 0, 0, 0, 0, 0, 0, 0, 0, 0, 0, 0, 0, 0, 0, 0, 0, 0, 0, 0, 0, 0, 0, 0, 0, 0, 0, 0, 0, 0, 0, 0, 0, 0, 0, 0, 0]	0.417051	32	XUTs	XUT_14R-89	sense
+	chrXIII	577564	577571	-	TTACCCA	1	flanking_window_reference_pA_signal	[0, 0, 0, 0, 0, 0, 0, 0, 0, 0, 0, 0, 0, 0, 0, 0, 0, 0, 0, 0, 0, 0, 0.232119110529, 2.08907199476, 3.94602487899, 2.08907199476, 0, 1.16059555264, 0, 0, 0, 0, 0, 0.232119110529, 1.16059555264, 0, 0, 0, 0, 0, 0, 0, 0, 0, 0, 0, 0, 0, 0, 0, 0, 0, 0, 0.928476442115, 0, 0, 0, 0, 0.232119110529, 0, 0, 0, 0, 0, 0, 0, 0, 0, 0.464238221058, 0, 0, 0.464238221058, 0, 0, 0, 0, 0]	1.87673	-6	3UTR	HLJ1	sense
-	chrXIII	795653	795660	-	CTACCCG	1	flanking_window_reference_pA_signal	[0.232119110529, 3.94602487899, 0, 1.6248337737, 2.08907199476, 0, 0, 0, 0.696357331587, 0.232119110529, 0, 0, 0, 0, 0, 0, 0, 0, 0.696357331587, 0, 0, 0, 0, 0, 0, 0, 0, 0, 0, 0, 0, 0, 0, 0.232119110529, 0, 0, 0, 0, 0, 0.232119110529, 0, 0, 0, 0, 0, 0, 0, 0, 0, 0, 0, 0, 0, 0, 0, 0, 0, 0, 0, 0, 0, 1.6248337737, 0, 0, 0, 0.232119110529, 0, 0, 0, 0, 0.464238221058, 0, 0, 1.39271466317, 0, 8.356287979…	0	-28	3UTR	INT_0_6867	sense
-	chrXIII	902608	902615	-	TTCCCCG	1	flanking_window_reference_pA_signal	[0, 3.01754843688, 99.8112175274, 0, 0, 0, 1.16059555264, 14.8556230738, 0, 0, 0.464238221058, 8.35628797904, 0, 0, 1.6248337737, 0, 0, 0, 0, 0, 0, 0, 0.232119110529, 0, 0.464238221058, 0, 0, 0, 0, 0, 0, 0, 0, 0, 0, 0, 0, 0, 0, 0, 0, 0, 0, 0, 0, 0, 0, 0, 0, 0, 0, 0, 0, 0, 0, 0, 0, 0, 0, 0, 0, 0, 0, 0, 0, 0, 0, 0, 0, 0, 0, 0, 0, 0, 0, 0, 0]	2.29378	45	intergenic_region	INT_0_6948	sense
+	chrXIII	517357	517364	+	TTACACG	1	flanking_window_reference_pA_signal	[0, 0, 0, 0, 0, 0, 0, 0, 0, 0, 0, 0, 0, 0, 0.232119110529, 0, 0, 0.696357331587, 0.696357331587, 0, 6.26721598428, 0, 0, 0, 0, 0, 0.232119110529, 0, 0, 0, 0, 0.232119110529, 0, 0, 0, 0, 1.85695288423, 0, 0, 14.1592657423, 0, 0, 0, 0, 0, 0, 3.48178665793, 0.232119110529, 0, 0, 0, 0, 3.2496675474, 0, 0, 0, 0, 0.464238221058, 0, 0, 0, 0, 0, 0, 0, 0, 0, 0, 0, 0, 0, 0, 0, 0, 0, 0, 0]	6.04724	9	3UTR	YMR124W	sense
-	chrXIII	135334	135341	+	TAACCCG	1	flanking_window_reference_pA_signal	[0, 0.464238221058, 7.89204975798, 12.0701937475, 29.4791270372, 0, 0.464238221058, 2.08907199476, 19.9622435055, 0, 0.232119110529, 0.696357331587, 0, 0.696357331587, 4.41026310005, 0, 0.232119110529, 0.696357331587, 0, 0, 0, 0, 0, 0, 0, 0, 0, 0, 0, 0, 0, 0, 0, 0, 0, 0, 0, 0, 0, 0, 0, 0, 0, 0, 0, 0, 0, 0, 0, 0, 0, 0, 0, 0, 0, 0, 0, 0, 0, 0, 0, 0, 0, 0, 0, 0, 0, 0, 0, 0, 0, 0, 0, 0, 0, 0, 0]	0	43	intergenic_region	INT_0_6363	sense
-	chrXIII	284709	284716	+	TTCCCCG	1	flanking_window_reference_pA_signal	[0, 0.232119110529, 0, 0, 3.01754843688, 16.4804568475, 0, 0.232119110529, 0, 0.232119110529, 0.696357331587, 0, 0, 1.16059555264, 0, 0.232119110529, 0, 0, 0.232119110529, 0, 0, 0.928476442115, 0, 0, 0, 0, 0, 0, 0, 0, 0, 0, 0, 0, 0, 0, 0, 0, 0, 0, 0, 0.232119110529, 2.32119110529, 0, 0, 0.232119110529, 0, 0, 0.232119110529, 0, 0, 11.6059555264, 0, 0, 0.464238221058, 0.696357331587, 0, 0, 0, 0, 0,…	0	42	intergenic_region	INT_0_6476	sense
+	chrXIII	826599	826606	+	TTACGCG	1	flanking_window_reference_pA_signal	[0, 0, 0, 0, 0, 0, 0, 0, 0, 0, 0, 0, 0, 0, 0, 0, 0, 0, 0, 0, 0, 0, 0, 0, 0, 0, 0, 0, 0, 0, 0, 0.696357331587, 0, 0, 0, 0, 0, 0, 0, 2.08907199476, 0.696357331587, 0, 0, 0, 0, 0, 0, 0, 0, 0, 0, 0, 0, 0, 0, 0, 0, 0, 0, 0, 0, 0, 0, 0, 0, 0, 0, 0, 0, 0, 0, 0, 0, 0, 0, 0, 0]	0	9	3UTR	PGM3	sense
+	chrXIII	263386	263393	+	CTACCCG	1	flanking_window_reference_pA_signal	[0, 0, 0, 0, 0, 0, 0.464238221058, 0, 0, 0, 0, 0, 0, 0, 0, 0, 0, 0, 0.232119110529, 1.85695288423, 0, 0, 0, 0, 0, 0, 0, 0, 0, 0, 0, 0, 0, 0, 0, 0, 0, 0, 0, 0, 0, 0, 0, 0, 0, 0, 0, 0, 0, 0, 0, 0, 0, 0, 0, 0, 0, 0, 0, 0, 0, 0, 0, 0, 0, 0, 0, 0, 0, 0, 0, 0, 0, 0, 0, 0, 0]	4.17051	-11	intergenic_region	INT_0_6459	sense
+	chrIV	694293	694300	-	TTCCCCG	1	flanking_window_reference_pA_signal	[0, 0, 0, 0, 0, 0, 0, 0, 0, 0, 0.696357331587, 0, 0.232119110529, 1.39271466317, 0.232119110529, 0.696357331587, 4.64238221058, 1.16059555264, 6.03509687375, 47.5844176584, 0, 0.232119110529, 0, 0.696357331587, 1.6248337737, 3.01754843688, 0, 0, 0, 0, 0, 0, 0, 0, 0, 0, 0, 0, 0, 0, 0, 0, 0, 0, 0, 0, 0, 0, 0, 0, 0, 0, 0, 0, 0, 0, 0, 0, 0, 0, 0, 0, 0, 0, 0, 0, 0, 0, 0, 0, 0, 0, 0, 0, 0, 0, 0]	61.9321	-11	3UTR	DPB4	sense
+	chrIV	33369	33376	-	TTCCCCG	1	flanking_window_reference_pA_signal	[0, 0, 0.232119110529, 0, 0, 0, 0, 0, 0, 0, 0, 0, 0, 0, 0, 0, 0, 0, 0, 0, 0, 0, 0.464238221058, 0.696357331587, 0.696357331587, 0, 1.39271466317, 3.2496675474, 0.464238221058, 24.3725066055, 1.16059555264, 0, 1.16059555264, 0, 0.696357331587, 0, 0, 1.16059555264, 0, 0, 0, 0, 0, 0, 0.232119110529, 0.464238221058, 0, 0, 0, 0, 0, 0, 0, 0, 0, 0, 0.464238221058, 0.928476442115, 2.08907199476, 0, 0, 11…	1.04263	46	3UTR	PHO13	sense
-	chrIV	861628	861635	-	TTTCCCG	1	flanking_window_reference_pA_signal	[0, 0, 0, 0.464238221058, 1.16059555264, 0, 0, 0.232119110529, 1.39271466317, 0, 0, 0, 0.232119110529, 0, 0, 0, 0.232119110529, 0, 0.232119110529, 0.232119110529, 0.232119110529, 0, 0.696357331587, 0.464238221058, 0, 0, 0, 1.6248337737, 3.2496675474, 0, 0, 4.41026310005, 0, 0, 0, 0, 0, 0, 0.464238221058, 0, 0, 0, 0, 0, 0, 0, 0, 0, 0, 0, 0, 0, 0, 0, 0, 0, 0, 0, 0, 0, 0, 0, 0, 0, 0, 0, 0, 0, 0, 0, …	0	16	intergenic_region	INT_0_1688	sense
-	chrIV	709398	709405	+	TTACCCT	1	flanking_window_reference_pA_signal	[0, 0, 0, 0, 0, 0, 0, 0, 0, 14.6235039633, 0, 0, 7.19569242639, 0, 0, 0.232119110529, 0, 0.232119110529, 0, 1.39271466317, 0, 0, 0, 0, 0, 0.696357331587, 3.2496675474, 0, 2.08907199476, 0, 7.19569242639, 0, 0, 0.696357331587, 11.3738364159, 0, 7.42781153692, 0, 0, 0, 0.232119110529, 0, 0, 0, 0, 0, 0.232119110529, 0.696357331587, 0, 0.696357331587, 0, 0, 0, 0, 0, 0, 0, 0, 0, 0.232119110529, 0, 0, …	0	38	intergenic_region	INT_0_1582	sense
-	chrIV	1185951	1185958	+	TTACCCT	1	flanking_window_reference_pA_signal	[0.928476442115, 0, 0, 0, 0.464238221058, 0.464238221058, 0, 0, 0, 0.232119110529, 0, 0, 0, 0, 0, 0, 0, 0, 0, 1.16059555264, 6.26721598428, 0, 0.232119110529, 0, 0.232119110529, 3.2496675474, 9.74900264221, 0, 0.696357331587, 7.19569242639, 0, 0, 0, 0.696357331587, 1.85695288423, 3.01754843688, 0, 0, 0, 0, 0, 1.16059555264, 0, 0, 0, 7.89204975798, 32.496675474, 0, 0, 3.2496675474, 22.7476728318, …	0	1	intergenic_region	INT_0_1912	sense
+	chrIV	1411975	1411982	+	TTACCCT	1	flanking_window_reference_pA_signal	[0, 0, 0, 0, 0, 0, 0, 0, 0, 0, 0, 0, 0, 0.232119110529, 0, 0, 0, 0, 0, 0, 0, 0, 0, 0, 0, 0, 0, 0.928476442115, 0, 0, 0.928476442115, 3.48178665793, 0, 0, 0, 0, 0, 0, 0, 0, 0, 0, 0, 0, 0, 0, 0, 0, 0, 0, 0, 0, 0, 0, 0, 0, 0, 0.232119110529, 0, 0, 0, 0, 0, 0, 0, 0, 0, 0, 0, 0, 0, 0, 0, 0, 0, 0, 0]	26.0657	1	SUTs	SUT076	sense
+	chrIV	636202	636209	+	TCACCCG	1	flanking_window_reference_pA_signal	[1.39271466317, 0, 1.16059555264, 0, 0, 0, 0.464238221058, 46.4238221058, 0, 14.6235039633, 0, 0.928476442115, 0, 1.16059555264, 3.71390576846, 0, 0, 0, 0, 0, 0, 0, 0.232119110529, 0, 0, 0, 0.232119110529, 0.232119110529, 0.464238221058, 0, 0.232119110529, 1.85695288423, 0, 0, 0, 0, 0, 0, 0.464238221058, 0, 0, 0, 0, 0, 0, 0, 0, 0, 0, 0, 0, 0, 0, 0, 0, 0, 0, 0, 0, 0, 0, 0, 0, 0, 0, 0, 0, 0, 0, 0, …	66.3111	-23	3UTR	YDR094W	sense
-	chrIV	1251803	1251810	+	TTACCCT	1	flanking_window_reference_pA_signal	[0, 0, 0, 0, 0, 0, 0, 0.232119110529, 0, 0, 0, 0.232119110529, 1.6248337737, 0, 0, 0.696357331587, 0.464238221058, 0, 0, 0.232119110529, 0, 0, 0, 0, 0, 0.232119110529, 0, 0, 0, 0, 0, 0, 0, 0, 0, 0, 0, 0, 0, 0, 0, 0, 0, 0, 0, 0, 0, 0, 0, 0, 0, 0, 0, 0, 0, 0, 0, 0, 0, 0, 0, 0, 0, 0, 0, 0, 0, 0, 0, 0, 0, 0, 0, 0, 0, 0, 0]	0	35	intergenic_region	INT_0_1962	sense
-	chrIV	1120325	1120332	+	TTACCAG	1	flanking_window_reference_pA_signal	[0, 0, 0, 0, 0, 0.232119110529, 0, 0, 0, 0, 1.85695288423, 29.2470079266, 0, 0, 0.696357331587, 16.4804568475, 0.696357331587, 4.64238221058, 0, 0, 0, 0, 0, 0, 0.232119110529, 2.32119110529, 8.58840708957, 0, 0, 0, 0, 0.232119110529, 0.232119110529, 0, 0.464238221058, 0.232119110529, 0, 0, 0, 0, 0.232119110529, 3.2496675474, 0, 0, 1.39271466317, 0, 0.232119110529, 0, 0, 0, 0.232119110529, 0, 0, 0…	0	36	intergenic_region	INT_0_1864	sense
-	chrVIII	151408	151415	-	TTACCCT	1	flanking_window_reference_pA_signal	[0, 0.464238221058, 0, 0, 0, 0, 0, 0, 0, 0, 0, 0, 0, 0, 0.464238221058, 0, 0, 0, 0, 0, 0, 0, 0, 0, 0.232119110529, 0, 0, 0, 0, 0, 0, 0, 0, 0, 0, 0, 0, 0, 0, 0, 0, 0, 0, 0, 0.232119110529, 0, 0, 0, 0, 0, 0, 0, 0, 0, 0, 0, 0, 0, 0, 0, 0, 0, 0, 0, 0, 0, 0, 0, 0, 0, 0, 0, 0, 0, 0, 0, 0]	0	46	intergenic_region	INT_0_4139	sense
-	chrVIII	381412	381419	-	TTACCCT	1	flanking_window_reference_pA_signal	[0, 0, 0, 0, 0, 0.464238221058, 0.928476442115, 0, 0, 0, 0, 0, 0.464238221058, 0, 0, 0, 0, 0, 0, 0, 0, 0, 0, 0, 0, 0, 0, 0, 0, 0, 0, 0, 0, 0, 0, 0, 0, 0, 0, 0, 0, 0, 0, 0, 0, 0, 0, 0, 0, 0, 0, 0, 0, 0, 0, 0, 0, 0, 0, 0, 0, 0, 0, 0, 0, 0, 0, 0, 0, 0, 0, 0, 0, 0, 0, 0, 0]	0	41	intergenic_region	INT_0_4321	sense
+	chrVIII	411115	411122	+	TTACGCG	1	flanking_window_reference_pA_signal	[0, 0, 0, 0, 0, 0, 0, 0, 0, 0, 0, 0, 0, 0, 0, 0, 0, 0, 0, 0, 0, 0, 0, 0, 0, 0, 0, 0, 0, 0, 0, 0, 0, 0, 0, 0, 0, 0, 0, 0, 0, 0, 0, 0, 0, 0, 0.232119110529, 0, 0, 0, 0, 0.928476442115, 0, 0, 0, 0, 0, 0, 0, 0, 0, 0, 0, 0, 0, 0, 0, 0, 0, 0, 0, 0, 0, 0, 0, 0, 0]	1.25115	21	snoRNA_300_nt_upstream	LIN1	antisense
+	chrVIII	277818	277825	+	TTACCCT	1	flanking_window_reference_pA_signal	[0, 0, 0, 0, 0, 0, 0, 0, 0, 0.696357331587, 0, 0.232119110529, 0, 0, 0.232119110529, 0.696357331587, 5.33873954216, 0, 0.232119110529, 0, 0.232119110529, 0.696357331587, 0.928476442115, 1.6248337737, 5.57085865269, 7.19569242639, 1.16059555264, 3.01754843688, 1.16059555264, 1.16059555264, 0.232119110529, 4.17814398952, 0, 0, 0, 0, 0, 0, 0, 0, 0, 0, 0, 0, 0, 0, 0, 0, 0, 0, 0, 0, 0, 0, 0, 0, 0, 0, …	15.2224	-5	3UTR	IPI1	sense
+	chrXVI	465731	465738	-	TTACCCT	1	flanking_window_reference_pA_signal	[0, 0.232119110529, 0.232119110529, 0, 0, 0, 0.232119110529, 0, 0, 0, 0, 0, 0, 0, 0, 0, 0, 0.696357331587, 0, 0, 0, 0, 0.232119110529, 0.232119110529, 3.2496675474, 0, 0, 0, 0, 0, 0, 0, 0, 0.232119110529, 0, 0, 0, 0, 0, 0.696357331587, 0, 0, 0, 0.232119110529, 0.464238221058, 0.464238221058, 0, 0.928476442115, 0.232119110529, 0.232119110529, 0, 0, 0.696357331587, 3.01754843688, 16.248337737, 0, 0…	4.37903	46	3UTR	CAM1	sense
+	chrXVI	451554	451561	-	TTACCCT	1	flanking_window_reference_pA_signal	[0, 0, 0, 0, 0, 0, 0.232119110529, 0, 0, 0, 0, 0, 0, 0, 0, 0, 0, 0, 0, 0, 0, 0, 0.232119110529, 0, 0, 0, 0, 0, 0, 0, 0, 0, 0, 0.232119110529, 0.464238221058, 0, 0, 0, 0, 0, 0, 0, 0, 0, 0, 0, 0, 0, 0, 0, 0, 0, 0, 0, 0, 0, 0, 0, 0, 0, 0, 0, 0, 0, 0, 0, 0, 0, 0.232119110529, 0, 0, 0, 0, 0, 0, 0, 0]	0.208525	4	SUTs	XUT_16F-180	sense
-	chrXVI	159695	159702	-	ATACCCG	1	flanking_window_reference_pA_signal	[0, 0, 0, 0.232119110529, 0, 0.928476442115, 18.5695288423, 0, 0, 16.7125759581, 0, 0, 0, 0, 0, 0, 0, 0, 0, 0, 0, 0, 0.696357331587, 0, 0, 0, 0.232119110529, 0, 0, 0, 0, 0.232119110529, 0, 0, 0, 0, 0, 0, 0, 0, 0, 0, 0, 0, 0, 0, 0, 0, 0, 0.232119110529, 0, 0, 0, 0, 0, 0, 0, 0, 0, 0, 0, 0, 0, 0, 0, 0, 0, 0, 0, 0, 0, 0, 0, 0, 0, 0, 0]	0.208525	41	intergenic_region	INT_0_8512	sense
-	chrXVI	641230	641237	+	CTACCCG	1	flanking_window_reference_pA_signal	[0, 0, 0, 0.464238221058, 1.85695288423, 1.39271466317, 0, 0.464238221058, 0, 0, 0, 0, 0, 0, 1.16059555264, 11.838074637, 51.2983234269, 0, 0, 0, 1.6248337737, 0, 0.232119110529, 0, 1.16059555264, 0, 0, 0, 0, 0, 0.232119110529, 16.4804568475, 0, 0, 0, 0, 0, 0, 0, 0, 0, 0.696357331587, 0, 0, 0, 0, 0, 0, 0, 0, 0, 0, 0, 0, 0, 0, 0, 0, 0, 0, 0, 0, 0, 0, 0, 0, 0, 0, 0, 0, 0, 0, 0, 0, 0, 0, 0]	0	31	intergenic_region	INT_0_8872	sense
-	chrVII	87376	87383	-	TAACCCG	1	flanking_window_reference_pA_signal	[0, 0, 0, 0, 0, 0.232119110529, 0, 0, 0.232119110529, 2.55331021582, 0, 2.32119110529, 6.73145420534, 0, 0.928476442115, 6.03509687375, 0, 0, 0, 0, 0, 0, 0, 0.232119110529, 0, 0, 0, 0, 0, 0, 0, 0, 0, 0, 1.39271466317, 0, 0, 0, 0, 0, 0, 0, 0, 0, 0, 0, 0, 0, 0, 0, 0, 0, 0, 0, 0, 0, 0, 0, 0, 0, 0, 0.232119110529, 0, 0.232119110529, 1.6248337737, 0, 0, 0, 0, 0, 0.232119110529, 0, 0, 0, 0, 0, 0]	0	35	intergenic_region	INT_0_3256	sense
-	chrVII	98755	98762	+	ATACCCG	1	flanking_window_reference_pA_signal	[0.928476442115, 2.08907199476, 0, 0.928476442115, 0, 0, 0.232119110529, 2.55331021582, 0, 0, 0, 0, 0, 0, 0, 0, 0, 0, 0, 0, 0.232119110529, 0, 0, 0, 0, 0.464238221058, 0, 0, 0, 0.232119110529, 0, 0, 0, 0, 0, 0, 0, 0, 0, 0, 0, 0, 0, 0, 0, 0, 0, 0, 0, 0, 0, 0, 0, 0, 0, 0, 0.232119110529, 0, 0, 0, 0, 0, 0, 0, 0, 0, 0, 0, 0, 0, 0, 0, 0, 0, 0, 0, 0]	0.834102	40	intergenic_region	INT_0_3268	sense
-	chrVII	832276	832283	+	TTACACG	1	flanking_window_reference_pA_signal	[0, 0, 0, 0, 0.232119110529, 0, 0, 0, 0, 0, 0, 0, 0, 0, 0, 0, 0.928476442115, 0, 0.232119110529, 0, 0, 0, 0, 0, 0, 0, 0, 0.232119110529, 0, 0, 0.232119110529, 0, 0, 0.232119110529, 0, 0.464238221058, 14.6235039633, 0, 2.78542932635, 0, 0.464238221058, 12.7665510791, 0, 0.928476442115, 0, 0, 0, 0, 0, 0, 0.464238221058, 0, 0, 0, 0.232119110529, 0, 0, 0, 0, 0, 0, 0, 0, 0, 0, 0, 0, 0, 0, 0, 0, 0, 0, …	0.208525	11	intergenic_region	INT_0_3830	sense
+	chrVII	393765	393772	+	TTTCCCG	1	flanking_window_reference_pA_signal	[0, 0, 0, 0, 0, 0, 0.232119110529, 0.232119110529, 2.55331021582, 0, 0, 0.464238221058, 0, 1.16059555264, 11.6059555264, 0, 0.696357331587, 0.696357331587, 0, 0, 0, 0, 0.232119110529, 0, 0, 0.232119110529, 0.232119110529, 0, 0.232119110529, 0, 0, 0, 0, 0, 0, 0, 0, 0, 0, 0, 0, 0, 0, 0, 0, 0, 0, 0, 0, 0, 0, 0, 0, 0, 0, 0, 0, 0, 0, 0, 0, 0, 0, 0, 0, 0, 0, 0, 0, 0, 0, 0, 0, 0, 0, 0, 0]	30.2362	-16	3UTR	PKP2	sense
-	chrVII	718728	718735	+	TTGCCCG	1	flanking_window_reference_pA_signal	[4.41026310005, 0, 6.49933509481, 0, 3.2496675474, 0, 0.464238221058, 0, 0, 0.232119110529, 0, 0, 0.232119110529, 0, 0, 0.232119110529, 0, 0, 0, 0, 2.32119110529, 0, 0, 0.232119110529, 0, 0, 0, 0, 0, 0, 0, 0, 0, 0, 0, 0, 0, 0, 0, 0, 0, 0, 0, 0, 0, 0, 0, 0, 0, 0, 0, 0, 0, 0, 0, 0, 0, 0, 0, 0, 0, 0, 0, 0, 0, 0, 0, 0, 0, 0.696357331587, 0, 0, 0, 0, 0.232119110529, 0, 0]	0	45	XUTs	XUT_7R-328	sense
-	chrXI	299253	299260	+	TCACCCG	1	flanking_window_reference_pA_signal	[0, 0, 0.232119110529, 0, 0.232119110529, 0, 0, 0, 0, 0, 0, 0, 0, 0, 0, 0, 0, 0, 0, 0, 0, 0, 0, 0, 0, 0, 0, 0.232119110529, 0, 0, 0, 0, 0, 0.232119110529, 0, 0, 0, 0, 0, 0, 0, 0, 0, 0, 0, 0, 0, 0, 0, 0, 0, 0, 0, 0, 0, 0, 0, 0, 0, 0, 0, 0, 0, 0, 0, 0, 0, 0.232119110529, 0, 0, 0, 0, 0, 0, 0, 0, 0]	0.208525	45	intergenic_region	INT_0_5228	sense
+	chrXI	205398	205405	+	TTACTCG	1	flanking_window_reference_pA_signal	[0, 0, 0, 0, 2.08907199476, 0, 0, 2.32119110529, 0, 1.85695288423, 0, 0, 0, 0, 0, 0, 0, 0, 0, 0, 0, 1.39271466317, 2.55331021582, 0.232119110529, 0.232119110529, 5.10662043163, 1.16059555264, 6.96357331587, 48.5128941005, 4.17814398952, 3.48178665793, 29.4791270372, 0, 0.928476442115, 0, 0, 0, 0.232119110529, 0, 0, 0, 0, 0, 0, 0, 0, 0, 0, 0, 0, 0, 0, 0, 0, 0, 0, 0, 0, 0, 0, 0, 0, 0, 0, 0, 0, 0, 0…	5.00461	-2	3UTR	PGM1	sense
+	chrV	198654	198661	-	TTCCCCG	1	flanking_window_reference_pA_signal	[0, 0, 0, 0, 0, 0, 0, 0, 0, 0.232119110529, 2.32119110529, 31.1039608109, 0, 1.16059555264, 0.232119110529, 0.232119110529, 2.78542932635, 25.3009830476, 135.789679659, 0, 65.6897082797, 0, 0.464238221058, 1.85695288423, 46.6559412163, 0, 4.17814398952, 0, 0.928476442115, 0, 0, 0, 0.232119110529, 0, 0, 0, 0, 0, 0, 0, 0, 0, 0, 1.6248337737, 0, 0, 0, 0, 0, 0, 0, 0, 0, 0.232119110529, 3.01754843688,…	470.642	-12	3UTR	RPN3	sense
-	chrV	73446	73453	-	TTACCCT	1	flanking_window_reference_pA_signal	[0, 0, 0.232119110529, 0, 0, 0, 0, 1.16059555264, 0, 0, 0, 0, 0.464238221058, 0, 0, 0, 0, 0.464238221058, 0.928476442115, 0, 0, 0, 0, 2.55331021582, 0, 0, 0, 1.16059555264, 1.85695288423, 11.838074637, 0, 0, 0, 4.17814398952, 0, 0.464238221058, 2.78542932635, 0, 0, 0, 0, 0, 0, 0, 0, 0, 0, 0, 0, 0, 0, 0, 0.928476442115, 6.96357331587, 0, 0, 0, 0, 0, 2.08907199476, 0, 0, 0, 0.928476442115, 0, 0, 0.…	0.417051	18	intergenic_region	INT_0_2584	sense
+	chrV	160531	160538	+	TTCCCCG	1	flanking_window_reference_pA_signal	[0, 0, 0, 0, 0, 0, 0, 0, 0.232119110529, 0, 0, 5.80297776322, 22.5155537213, 0, 0, 0.232119110529, 0.232119110529, 1.16059555264, 0, 0.696357331587, 0.232119110529, 0, 0, 0, 0, 0.232119110529, 5.57085865269, 55.7085865269, 0, 0.464238221058, 0, 3.01754843688, 32.032437253, 1.16059555264, 12.302312858, 6.03509687375, 0, 0.232119110529, 0.928476442115, 0.232119110529, 0.464238221058, 0, 0, 0, 0, 0,…	50.8802	-3	3UTR	FMP52	sense
-	chrV	205089	205096	+	TAACCCG	1	flanking_window_reference_pA_signal	[0, 0, 0, 0, 0, 0, 0, 0.232119110529, 12.0701937475, 0, 0, 0, 0.232119110529, 1.6248337737, 0, 0.232119110529, 0, 0.232119110529, 0.464238221058, 3.2496675474, 0, 0.696357331587, 2.55331021582, 0, 0.464238221058, 1.6248337737, 1.85695288423, 1.6248337737, 0, 0.464238221058, 1.6248337737, 0.232119110529, 3.01754843688, 0, 0.232119110529, 0.232119110529, 0, 0, 0, 0, 0.232119110529, 0, 0, 0, 0, 0.23…	1.6682	39	intergenic_region	INT_0_2696	sense
+	chrV	167721	167728	+	TTACACG	1	flanking_window_reference_pA_signal	[0, 0, 0, 0, 0, 0, 0, 0, 0, 0, 0, 0, 0, 0, 0, 0, 0, 0, 0.232119110529, 0, 0, 0, 0, 0, 0, 0, 0, 0, 0, 0, 0, 0.696357331587, 0, 0, 0, 0, 0, 0, 0, 0, 0, 0, 0, 0, 0, 0, 0, 0, 0, 0, 0, 0, 0, 0, 0, 0, 0, 0, 0.232119110529, 0, 0, 0, 0, 0, 0, 0, 0, 0, 0, 0, 0, 0, 0, 0, 0, 0, 0]	0.208525	1	XUTs	XUT_5F-75	sense
+	chrV	504940	504947	+	TTACCCT	1	flanking_window_reference_pA_signal	[0, 0, 0, 0, 0, 0, 0, 0, 0, 0, 0, 0, 0, 0, 0, 0, 0, 0, 0, 0, 0, 0, 0, 0, 0, 0, 0, 0, 0, 0, 0, 0, 0, 0, 0, 0, 0, 0, 0, 0, 0, 0, 0, 0, 0, 0, 0, 0, 0, 0, 0, 0, 0, 0, 0, 0, 0, 0, 0, 0, 0, 0, 0, 0, 0, 0, 0, 0, 0, 0.232119110529, 0.232119110529, 2.08907199476, 0, 0, 0, 0, 0.696357331587]	0	41	SUTs	XUT_5F-239	sense
+	chrXII	460061	460068	-	TTAACCG	1	flanking_window_reference_pA_signal	[0, 0, 0.232119110529, 1.16059555264, 0, 0.928476442115, 0, 0, 1.6248337737, 0.696357331587, 0, 0.232119110529, 0.928476442115, 0.464238221058, 0, 0, 0, 0, 0, 0, 0, 0, 0, 0, 0, 0, 0, 0, 0, 0, 0, 0, 0, 0, 0, 0, 0, 0, 0, 0, 0, 0, 0, 0, 0, 0, 0, 0, 0, 0, 0, 0, 0, 0, 0, 0.232119110529, 0, 0, 0.928476442115, 0, 0, 0.232119110529, 0, 0, 0, 0, 0, 0, 0, 0, 0, 0, 0, 0, 0, 0, 0]	11.2604	-22	XUTs	INT_0_5819	sense
-	chrXII	636272	636279	+	TTACCCT	1	flanking_window_reference_pA_signal	[0.232119110529, 0, 0, 0, 0, 0, 0.232119110529, 1.16059555264, 4.41026310005, 0, 0, 0, 0.696357331587, 0, 0, 0, 0, 0, 0, 0, 0, 0, 0, 0, 0.232119110529, 0.232119110529, 0, 0, 0, 0, 2.32119110529, 0, 0, 0, 0.464238221058, 0, 0, 0, 0, 0, 0, 0, 0, 0, 0, 0, 0, 0, 0, 0, 0, 0, 0, 0, 0, 0, 0, 0, 0, 0, 0, 0, 0, 0, 0, 0, 0, 0, 0, 0, 0, 0, 0, 0, 0, 0, 0]	0	39	SUTs	SUT700	sense
-	chrXII	680976	680983	+	TGACCCG	1	flanking_window_reference_pA_signal	[0.232119110529, 0, 0, 0, 0, 0.464238221058, 0, 1.85695288423, 0, 31.5681990319, 0, 0, 6.96357331587, 67.5466611639, 0, 1.16059555264, 8.58840708957, 31.5681990319, 0, 0, 0, 0.696357331587, 0.464238221058, 0.464238221058, 17.1768141791, 0, 0.464238221058, 2.55331021582, 3.94602487899, 0, 0, 0, 0, 0, 0, 0, 0, 0, 0, 0, 0, 0, 0, 0, 0, 0, 0, 0, 0, 0, 0, 0, 0, 0, 0, 0, 0, 0, 0, 0, 0, 0, 0.928476442115…	0	34	CDS	YLR269C	sense
+	chrXII	490666	490673	+	TTACCCT	1	flanking_window_reference_pA_signal	[0, 0, 0, 0, 0, 0, 0, 0, 0, 0.464238221058, 0, 0, 0, 0, 0, 0, 0, 0, 0, 0, 0, 0, 0, 0, 0.232119110529, 0, 0, 0, 0, 0, 0, 0, 0, 0, 0, 0.232119110529, 1.16059555264, 0, 0, 0.232119110529, 0, 0.232119110529, 4.87450132111, 0, 0, 0, 0, 0, 0.464238221058, 0.696357331587, 0, 0.232119110529, 0, 0, 0, 0, 0, 0, 0, 0, 0, 0, 0, 0, 0.696357331587, 0, 0, 0, 0, 0, 0, 0, 0, 0, 0, 0, 0]	5.00461	12	intergenic_region	INT_0_5839	sense
+	chrXII	833559	833566	+	TTACCCT	1	flanking_window_reference_pA_signal	[0, 0, 0, 0, 0, 0, 0, 0, 0, 0, 0, 0, 0, 0, 0, 0, 0, 0.232119110529, 0.928476442115, 0, 0, 0, 0.232119110529, 6.96357331587, 0, 0, 0, 0, 0.232119110529, 0, 0, 0, 0, 0, 0, 0, 0, 0, 0, 0, 0, 0, 0, 0, 0, 0, 0, 0, 0.696357331587, 0, 0, 0, 0, 0, 0, 0, 0, 0, 0, 0, 0, 0, 0, 0, 0, 0, 0.232119110529, 0, 0, 0, 0, 0, 0, 0, 0, 0, 0]	5.42166	-7	3UTR	YLR352W	sense
-	chrXII	490699	490706	+	TTACCCC	1	flanking_window_reference_pA_signal	[0, 0.232119110529, 0, 0, 0, 0, 0, 0, 0, 0, 0, 0, 0.232119110529, 1.16059555264, 0, 0, 0.232119110529, 0, 0.232119110529, 4.87450132111, 0, 0, 0, 0, 0, 0.464238221058, 0.696357331587, 0, 0.232119110529, 0, 0, 0, 0, 0, 0, 0, 0, 0, 0, 0, 0, 0.696357331587, 0, 0, 0, 0, 0, 0, 0, 0, 0, 0, 0, 0, 0, 0, 0, 0, 0, 0, 0, 0, 0, 0, 0, 0, 0, 0, 0, 0, 0, 0, 0, 0, 0, 0, 0]	0.625576	28	intergenic_region	INT_0_5835	sense
+	chrIX	46025	46032	-	TTTCCCT	2	flanking_window_reference_pA_signal	[0, 0, 0, 0, 0, 0, 0, 0, 0, 0.464238221058, 0, 0, 0.232119110529, 0, 0.464238221058, 6.73145420534, 0, 0, 0, 0, 0.928476442115, 0, 0, 2.32119110529, 0.928476442115, 0.464238221058, 0.696357331587, 0, 0, 0, 0, 0, 0, 0, 0, 0, 0, 0, 0, 0, 0, 0, 0, 0, 0, 0, 0, 0, 0, 0, 0, 0, 0, 0, 0, 0, 0, 0, 0, 0, 0, 0, 0, 0, 0, 0, 0, 0.232119110529, 0, 9.98112175274, 0, 0, 0, 0.232119110529, 0, 0, 0.696357331587]	15.0138	39	3UTR	BNR1	sense
+	chrIX	375257	375264	-	TTAAACG	2	flanking_window_reference_pA_signal	[0, 0, 0, 0, 0, 0, 0, 0, 0, 0, 0, 0, 0, 0, 0, 0, 0, 0, 0, 0, 0, 0, 0, 0, 0, 0, 0, 0, 0, 0, 0, 0, 0, 0, 0, 0, 0, 0, 0, 0, 0, 0, 0, 0, 0, 0, 0, 0, 0, 0, 0, 0, 0.232119110529, 0, 0.928476442115, 0.232119110529, 0, 0, 0, 0, 0, 0.232119110529, 0, 0, 0, 0, 0, 0, 0, 0.464238221058, 0, 1.39271466317, 0, 0, 0, 0.696357331587, 8.35628797904]	0	46	3UTR	MSL1	sense
-	chrIX	322077	322084	-	TTACATG	2	flanking_window_reference_pA_signal	[0.696357331587, 0.232119110529, 0, 0.696357331587, 0.232119110529, 0, 0, 0, 0, 0, 0, 0, 1.6248337737, 0.464238221058, 0, 0.232119110529, 0, 0, 0, 0, 0.232119110529, 0, 0.232119110529, 0, 0, 0, 0, 0, 0, 0, 0, 0, 0, 0, 0, 0, 0, 0, 0, 0, 0, 0, 0, 0, 0, 0, 0, 0, 0, 0, 0, 0, 0, 0, 0, 0, 0, 0, 0, 0, 0, 0, 0, 0, 0, 0, 0, 0, 0, 0, 0, 0, 0, 0, 0, 0, 0]	0	35	SUTs	SUT612	sense
-	chrIX	256050	256057	-	TCATCCG	2	flanking_window_reference_pA_signal	[0, 0, 0.464238221058, 7.89204975798, 152.270136507, 0, 0, 0, 0.232119110529, 4.17814398952, 9.05264531063, 0, 0.928476442115, 34.8178665793, 187.088003086, 0, 0, 3.01754843688, 3.01754843688, 8.8205262001, 0, 0, 6.49933509481, 9.74900264221, 0, 0.696357331587, 0, 1.39271466317, 9.05264531063, 0.696357331587, 0, 0, 0, 0.232119110529, 0.232119110529, 0, 0.464238221058, 0.696357331587, 0, 0, 0, 0.2…	0.834102	33	3UTR	INT_0_2372	sense
-	chrIX	26449	26456	+	TTATACG	2	flanking_window_reference_pA_signal	[0, 0, 1.39271466317, 0, 0, 0, 0, 0, 0, 0.232119110529, 0, 0, 0, 0.232119110529, 0.464238221058, 0.696357331587, 0, 0, 2.32119110529, 0, 0, 1.16059555264, 0, 0, 0, 0, 0, 0, 0, 0, 0, 0, 0, 0, 0.696357331587, 0.696357331587, 0, 0, 0, 0, 0, 0, 0, 0.232119110529, 0, 0, 0.232119110529, 0, 0, 0, 0, 0, 0, 0, 0, 0.232119110529, 0, 0, 0, 0, 0, 0, 0, 0, 0, 0, 0, 0, 0, 0, 0.232119110529, 0, 0, 0, 0, 0, 0]	0	29	intergenic_region	INT_0_2199	sense
+	chrIX	39217	39224	+	TTTCACG	2	flanking_window_reference_pA_signal	[0, 0, 0, 0, 0, 2.08907199476, 0, 0, 1.6248337737, 0, 0, 0, 0, 0.696357331587, 3.48178665793, 19.2658861739, 0, 0, 0.696357331587, 0, 0.464238221058, 0, 0.232119110529, 0, 0, 0, 0, 0, 0, 0, 0, 0, 0, 0, 0, 0, 0.232119110529, 0.464238221058, 0, 0, 0, 0, 0, 0, 0, 0, 0, 0, 0, 0, 0, 0, 0, 0, 0, 0, 0, 0, 0, 0, 0, 0, 0, 0, 0, 0, 0, 0, 0, 0, 0, 0, 0, 0, 0, 0, 0]	18.7673	-15	3UTR	SUC2	sense
-	chrX	74834	74841	-	TTACTCA	2	flanking_window_reference_pA_signal	[0, 0, 0.232119110529, 0, 0, 0, 1.6248337737, 0, 0, 0, 0, 0, 0, 0, 0, 0, 0, 0, 0, 0, 0, 0, 0, 0, 0, 0, 0, 0, 0, 0, 0, 0, 0, 0, 0, 0, 0.464238221058, 0, 0, 0, 0, 0, 0, 0, 1.16059555264, 0, 0, 0, 0, 0.464238221058, 2.55331021582, 0, 0.464238221058, 0.232119110529, 0, 0, 0, 0.928476442115, 2.32119110529, 0, 0, 0, 0, 0, 0.232119110529, 0, 0, 0, 0.232119110529, 0.696357331587, 0, 0, 0.232119110529, 0,…	12.5115	-3	3UTR	RPS22A	sense
+	chrX	533797	533804	-	TTTTCCG	2	flanking_window_reference_pA_signal	[0, 0, 0, 0, 0, 0, 0, 0.232119110529, 0, 0, 0, 0, 0, 0, 0, 0, 0.232119110529, 0, 0, 0, 0, 0, 0, 0, 0, 0, 0, 0, 0, 0, 0, 0, 0, 0, 0, 0, 0, 0, 0, 0.464238221058, 0, 0, 0.928476442115, 0, 0, 0.232119110529, 2.32119110529, 0.232119110529, 0, 0, 2.78542932635, 18.3374097318, 0, 0.232119110529, 0, 4.17814398952, 1.39271466317, 7.19569242639, 0, 0.464238221058, 6.49933509481, 0, 1.85695288423, 0, 0, 0, …	0.208525	21	3UTR	RAD7	sense
-	chrX	407409	407416	-	TTAAACG	2	flanking_window_reference_pA_signal	[0, 0, 0.464238221058, 0, 0.232119110529, 0, 0.696357331587, 0, 0.464238221058, 2.08907199476, 0, 1.85695288423, 0, 0.232119110529, 0, 0.232119110529, 0, 0.464238221058, 1.16059555264, 0.464238221058, 0, 0, 0.232119110529, 0.232119110529, 1.39271466317, 0, 0, 0, 0, 0, 0.232119110529, 0, 0, 0, 0, 0, 0, 0, 0, 0, 0.464238221058, 0, 0, 0, 1.6248337737, 0, 0, 0, 0, 0, 0.464238221058, 0, 0, 0, 0, 0, 0,…	0	38	CDS	YJL015C	sense
+	chrX	83891	83898	+	TTACAAG	2	flanking_window_reference_pA_signal	[0, 0, 0, 0, 0, 0, 0, 0, 0, 0, 4.17814398952, 0, 18.5695288423, 0, 0, 0, 0.928476442115, 3.71390576846, 0, 9.51688353168, 0, 0, 0, 1.85695288423, 0, 0, 0, 0, 2.78542932635, 0.464238221058, 3.01754843688, 44.334750111, 0, 4.41026310005, 0, 0, 0.928476442115, 0.696357331587, 1.39271466317, 0, 5.57085865269, 0, 0, 0, 0, 0, 0, 0.928476442115, 0.232119110529, 0, 0, 0, 0, 0, 0, 0, 0, 0, 0, 0, 0, 0, 0, …	29.8191	1	3UTR	GON7	sense
+	chrX	462472	462479	+	TTACTTG	2	flanking_window_reference_pA_signal	[0, 0, 0, 0, 0, 0, 0, 0, 0, 0, 0, 0, 0, 0, 0, 0, 0, 0, 0, 0, 0, 0, 0, 0, 0, 0, 0, 0, 0, 0, 0, 0, 0, 0, 0, 0, 0, 0.464238221058, 0.928476442115, 0, 0, 0, 0, 0, 0, 0, 0, 0, 0, 0, 0, 0, 0, 0, 0, 0, 0, 0, 0, 0, 0, 0, 0, 0.696357331587, 0, 0, 0, 0, 0, 0, 0, 0, 0, 0, 0, 0, 0]	0	8	3UTR	TMA22	sense
+	chrX	705635	705642	+	TTTCCTG	2	flanking_window_reference_pA_signal	[0, 0, 0, 0, 0, 0, 0, 0, 0, 0, 0, 0, 0, 0, 0, 0.232119110529, 0, 0, 0.232119110529, 0, 1.6248337737, 0, 0, 0, 3.01754843688, 1.39271466317, 0, 0, 6.03509687375, 0, 0, 0, 0.232119110529, 3.71390576846, 0.232119110529, 0.232119110529, 0, 0, 0.696357331587, 0, 0, 0, 0, 0, 0, 0, 0, 0, 0, 0, 0, 0, 0, 0, 0, 0, 0, 0, 0.232119110529, 0, 0, 0, 0, 0, 0, 0.232119110529, 1.39271466317, 0, 0, 0, 0, 0, 0, 0, 0…	2.08525	-2	3UTR	HMS2	sense
-	chrX	207618	207625	+	TTGCCCT	2	flanking_window_reference_pA_signal	[4.64238221058, 0, 3.01754843688, 0.232119110529, 0, 3.01754843688, 3.94602487899, 1.16059555264, 0, 0, 0, 0.232119110529, 0, 1.6248337737, 8.12416886851, 0, 0.696357331587, 8.58840708957, 0, 0.696357331587, 13.9271466317, 17.1768141791, 0, 0, 0, 0, 0, 0, 0, 0, 0, 0, 0, 0, 0.928476442115, 0, 0.232119110529, 0, 0, 0, 0, 0.464238221058, 0.232119110529, 0.464238221058, 0, 0, 0, 0, 0, 0, 0, 0, 0, 0, …	0	26	intergenic_region	INT_0_4622	sense
+	chrX	54258	54265	+	TTAACGG	2	flanking_window_reference_pA_signal	[0, 0, 0, 0, 0, 0, 0, 0, 0, 0, 0, 0, 0, 0, 0, 0, 0, 0, 0, 0, 0, 0, 0, 0, 0, 0, 0, 0.232119110529, 1.85695288423, 0, 1.39271466317, 8.35628797904, 0, 0, 0, 0, 0, 0, 0, 0, 0, 0, 0, 0, 0, 0, 0, 0, 0, 0.232119110529, 1.39271466317, 0.232119110529, 0, 0.232119110529, 0.232119110529, 0, 0, 0, 2.32119110529, 25.0688639371, 0, 0, 0, 0, 0.232119110529, 0.696357331587, 0, 0, 0, 0, 0.232119110529, 0, 0, 0, …	1.25115	29	3UTR	PRP21	sense
-	chrX	613088	613095	+	TTATTCG	2	flanking_window_reference_pA_signal	[0, 0.232119110529, 0.232119110529, 0, 0, 0, 0, 0, 0, 0, 0.464238221058, 0, 0, 0.464238221058, 0.232119110529, 0, 0, 0, 0.696357331587, 0, 0.232119110529, 0, 0, 0, 0, 0, 0, 0, 0.464238221058, 0, 0.232119110529, 2.08907199476, 0, 0, 0.464238221058, 2.32119110529, 0, 0, 0, 0, 0, 8.35628797904, 0, 0, 0, 0.696357331587, 0, 0, 0, 0, 0, 0, 0, 0.232119110529, 0, 0, 0.232119110529, 0, 0.232119110529, 0, …	0	6	3UTR	INT_0_4918	sense
+	chrX	68893	68900	+	TTTCCCT	2	flanking_window_reference_pA_signal	[0, 0, 0, 0, 0, 0, 0, 0, 0, 0, 0, 0, 0, 0, 0, 0.232119110529, 0.232119110529, 0, 0, 0, 0.232119110529, 0, 0, 0, 0.928476442115, 0.232119110529, 0, 0, 0, 0, 0, 0, 0, 0, 0, 0, 0, 0, 0, 0, 0, 0, 0, 0, 0, 0, 0, 0, 0, 0, 0, 0, 0, 0, 0, 0, 0, 0, 0, 0, 0, 0, 0, 0, 0, 0, 0, 0, 0, 0, 0, 0, 0, 0, 0, 0, 0]	1.87673	-6	SUTs	SUT200	sense
-	chrII	761020	761027	-	TTATCCC	2	flanking_window_reference_pA_signal	[0, 1.16059555264, 4.17814398952, 0, 0, 0, 0, 0.696357331587, 0, 0, 3.94602487899, 0, 0, 0, 0.696357331587, 0.464238221058, 0, 0, 0, 0, 0, 0, 0, 0, 0, 0, 0, 0, 0, 0, 0, 0, 0, 0, 0, 0, 0, 0, 0, 0, 0, 0, 0, 0, 0, 0, 0, 0, 1.39271466317, 0, 0, 0, 0, 0, 0.232119110529, 0.232119110529, 0.464238221058, 0, 0.464238221058, 0, 0, 0, 0, 0.696357331587, 0, 0, 0, 0, 0, 0, 0, 0, 0, 0, 0, 0, 0]	0	45	intergenic_region	INT_0_770	sense
+	chrII	565492	565499	-	TTATTCG	2	flanking_window_reference_pA_signal	[0, 0, 0, 0, 0, 0, 0, 0, 0, 0, 0, 0, 0, 0, 0, 0, 0, 0, 0, 0, 0.232119110529, 0, 0, 0, 0, 0, 0, 0, 0, 0, 0.232119110529, 2.32119110529, 0, 0, 6.73145420534, 0, 0, 49.6734896532, 0, 0, 35.2821048004, 0, 0, 6.26721598428, 0, 0, 21.3549581687, 0, 0, 8.12416886851, 63.6006362849, 0, 47.8165367689, 0, 0, 1.16059555264, 5.80297776322, 23.4440301634, 0, 16.7125759581, 43.6383927794, 0, 17.6410524002, 134…	0.417051	33	3UTR	YSY6	sense
+	chrII	491226	491233	-	TTGTCCG	2	flanking_window_reference_pA_signal	[0.232119110529, 2.08907199476, 76.367187364, 0, 61.9758025112, 0, 0.232119110529, 0.928476442115, 0, 0.232119110529, 0, 0, 0, 0.464238221058, 0.464238221058, 0, 0.232119110529, 2.55331021582, 0, 0.464238221058, 0, 0, 0, 0, 0, 0, 0, 0, 0, 0, 0, 0.232119110529, 0.464238221058, 0, 0.696357331587, 0, 0, 0, 0, 0.232119110529, 0, 0, 0, 0, 0, 0, 0, 0, 0, 0, 0, 0, 0, 0.232119110529, 0, 0, 0, 0, 0.464238…	121.987	-28	3UTR	INT_0_565	sense
-	chrII	193621	193628	-	TTATACG	2	flanking_window_reference_pA_signal	[0, 0, 0, 0.232119110529, 0, 0, 0, 0, 0, 0.464238221058, 0.464238221058, 0, 0.232119110529, 0, 0, 0, 0, 0, 0, 0, 0, 0.232119110529, 0, 0, 0, 0, 0, 0, 0, 0, 0, 0, 0, 0, 0, 0, 0, 0, 0, 0, 0, 0.464238221058, 0.464238221058, 0, 0, 0, 0, 0, 0, 0, 0, 0, 0, 0, 0, 0, 0, 0, 1.39271466317, 12.7665510791, 0, 3.01754843688, 0, 1.85695288423, 1.85695288423, 18.8016479528, 0, 1.6248337737, 4.41026310005, 13.23…	0	-18	intergenic_region	INT_0_341	sense
-	chrII	171281	171288	+	TTGCCCC	2	flanking_window_reference_pA_signal	[0, 0, 0, 0, 0, 0.232119110529, 1.16059555264, 0, 0, 0, 0, 0, 0, 0, 0, 0.696357331587, 0, 0, 0, 0, 0, 0, 0, 0.232119110529, 0, 0, 0.232119110529, 0.464238221058, 0, 0, 0, 0, 0, 0, 0, 0, 0, 0, 0, 0, 0, 0.232119110529, 0.232119110529, 0.464238221058, 0.232119110529, 0.696357331587, 3.01754843688, 0, 0, 0, 0, 3.71390576846, 0, 0, 0, 0, 0, 0, 0, 0.232119110529, 0, 0, 0, 0, 0, 0, 0, 0, 0, 0, 0.4642382…	0	-4	intergenic_region	INT_0_329	sense
+	chrII	395211	395218	+	TTTCTCG	2	flanking_window_reference_pA_signal	[0, 0, 0, 0, 0.464238221058, 0.928476442115, 0, 0, 0.232119110529, 0.696357331587, 0, 0.232119110529, 0, 0, 0.928476442115, 4.64238221058, 0, 0, 0.464238221058, 6.96357331587, 0, 1.16059555264, 0, 0, 1.6248337737, 0, 0, 0, 0.464238221058, 0, 0, 0, 0, 0, 0, 9.05264531063, 21.3549581687, 0, 0, 0, 0.232119110529, 0.464238221058, 2.32119110529, 0.232119110529, 0, 0, 0.232119110529, 7.42781153692, 154…	25.4401	18	3UTR	ECM33	sense
+	chrII	739666	739673	+	TTACCAC	2	flanking_window_reference_pA_signal	[0, 0, 0, 0, 0, 0, 0, 0, 0, 0, 0, 0, 0, 0, 0, 0, 0, 0, 0, 0, 0, 0, 0, 0, 0, 0, 0, 0.232119110529, 2.32119110529, 0, 0.928476442115, 12.7665510791, 0, 4.87450132111, 7.89204975798, 0, 0, 0, 2.55331021582, 13.2307893001, 15.784099516, 0, 10.2132408633, 0, 0, 0, 0, 0, 3.2496675474, 0.696357331587, 17.4089332897, 0, 0, 0, 0, 0, 3.94602487899, 0, 0, 0, 0, 0, 0, 0, 0, 0, 0, 0, 0, 0, 0, 0, 0, 0, 0, 0, 0]	0.208525	20	3UTR	TSC10	sense
+	chrII	40645	40652	+	TCACGCG	2	flanking_window_reference_pA_signal	[0, 0, 0, 0, 0, 0, 0, 0, 0, 0, 0, 0, 0, 0, 0, 0, 0, 3.01754843688, 0, 0.232119110529, 0.232119110529, 1.16059555264, 0.232119110529, 0, 0, 0.232119110529, 0, 2.55331021582, 4.17814398952, 0, 0, 0.696357331587, 0, 0, 0, 0.464238221058, 0.232119110529, 0, 0, 0, 0, 0, 0, 0.232119110529, 0, 0, 0, 0, 0, 0, 0, 0, 0, 0, 0, 0, 0, 0, 0, 0, 0, 0, 0, 0, 0, 0, 0, 0, 0, 0, 0, 0, 0, 0, 0, 0, 0]	1.6682	-2	3UTR	INT_0_234	antisense
+	chrII	299989	299996	+	TCACACG	2	flanking_window_reference_pA_signal	[0, 0, 0, 0, 0, 0, 0.232119110529, 0, 0, 0, 0, 0, 0.232119110529, 0, 0, 0.696357331587, 0, 0.232119110529, 0, 0.928476442115, 4.87450132111, 0, 0, 0, 0, 0, 0.232119110529, 0, 0, 0, 0, 2.08907199476, 0, 0.232119110529, 0, 0, 0.232119110529, 0, 0, 0, 0, 0, 0.232119110529, 0, 0, 0, 0, 0, 0.696357331587, 0, 0, 0.464238221058, 0, 0, 0, 0, 0, 0, 0, 0, 0, 0, 0, 0, 0, 0, 0, 0.232119110529, 0, 0, 0, 0.232…	5.00461	-10	3UTR	RKM3	sense
-	chrVI	90743	90750	-	TTCTCCG	2	flanking_window_reference_pA_signal	[0, 0, 0, 0, 0, 0, 0.232119110529, 0, 0, 0.232119110529, 0.232119110529, 0, 0.464238221058, 1.39271466317, 0, 0, 0, 0.232119110529, 0, 0.232119110529, 0.232119110529, 0, 0, 0, 0, 0.232119110529, 0, 0, 0, 0, 0, 0, 0, 0, 0, 0, 0, 0, 0, 0, 0, 0, 0, 0, 2.08907199476, 0, 0, 0, 0, 0, 0, 0, 0, 0, 0, 0, 0.232119110529, 0, 0, 1.6248337737, 8.58840708957, 0, 3.48178665793, 0, 0, 0, 0, 0, 0, 0, 0, 0, 0, 0, …	0	-13	5UTR	SUT103	antisense
+	chrVI	90436	90443	+	TGACCTG	2	flanking_window_reference_pA_signal	[0.232119110529, 0, 0, 0, 0, 0, 0, 0, 0, 0, 0, 0, 0.232119110529, 0, 4.87450132111, 0, 0, 0, 0, 0, 0, 0.464238221058, 0, 0.232119110529, 0, 0, 0, 0, 0, 0, 0, 0, 0, 0, 0, 0.464238221058, 0.232119110529, 0, 0, 0, 0, 0, 0, 0, 0, 0, 0, 0, 0, 0, 0, 0, 0, 0, 0, 0, 0, 0, 0, 0, 0, 0, 0, 0, 0, 0, 0, 0, 0, 0, 0, 0, 0, 0, 0, 0, 0]	5.63019	-16	SUTs	SUT103	sense
-	chrI	143448	143455	+	ATACGCG	2	flanking_window_reference_pA_signal	[7.42781153692, 0, 0.464238221058, 0, 0, 0, 0.464238221058, 0.696357331587, 3.2496675474, 0, 0, 0, 0, 0, 0, 0, 0.232119110529, 0, 0.232119110529, 0, 0, 0, 3.71390576846, 0, 12.5344319686, 0, 0, 6.26721598428, 0, 0.464238221058, 0, 0, 0.232119110529, 0.464238221058, 0.232119110529, 0, 219.816797671, 0, 0, 0, 0, 43.1741545584, 0, 1.39271466317, 0.464238221058, 0, 0, 0.232119110529, 0, 0.46423822105…	0	11	intergenic_region	INT_0_150	sense
-	chrI	33052	33059	+	TTCCGCG	2	flanking_window_reference_pA_signal	[0, 0, 1.39271466317, 0, 0, 0, 0, 0, 0, 0, 0.232119110529, 0, 0, 2.32119110529, 0, 0.464238221058, 0, 0, 0, 0.232119110529, 0, 0, 0, 0, 0, 0, 0.232119110529, 0, 0, 0, 0, 0, 0, 0, 0, 0, 0, 0, 0, 0, 0, 0, 0, 0, 0, 0, 0, 0, 0, 0, 0, 0, 0, 0, 0, 0, 0.232119110529, 0, 0, 0, 0, 0, 0, 0, 0, 0, 0, 0, 0, 0, 0, 0, 0, 0, 0, 0, 0]	0.208525	34	SUTs	XUT_1R-18	sense
+	chrXV	307669	307676	-	TTGCGCG	2	flanking_window_reference_pA_signal	[0, 0, 0, 0, 0, 0, 0, 0, 0, 0, 0, 0, 0, 0, 0, 0, 0, 0, 0, 0, 0, 0, 0, 0, 0, 0, 0, 0, 0, 0, 0, 0, 0, 0, 0, 0, 0, 0, 0, 0, 0, 0, 0, 0.696357331587, 3.2496675474, 0, 0, 6.96357331587, 0, 0.232119110529, 0, 0.696357331587, 10.2132408633, 0, 0, 0, 0, 0, 0, 0, 0.464238221058, 0, 0, 0, 0.464238221058, 0, 0, 0, 0, 0, 0.464238221058, 0, 0, 0, 0, 0, 0]	1.6682	22	3UTR	PLB3	sense
+	chrXV	147232	147239	-	TTTCGCG	2	flanking_window_reference_pA_signal	[0, 0, 0, 0, 0, 0, 0, 0, 0, 0, 0, 0, 0, 0, 0, 0, 0, 0, 0, 0, 0, 0, 0, 0, 0, 0, 0, 0, 0, 0, 0, 0, 0, 0.464238221058, 0, 0, 0, 0, 0, 0, 0, 0, 0, 1.6248337737, 0, 0, 0, 0, 0, 0.232119110529, 0, 0, 0, 0, 0, 0, 0, 0, 0, 0, 0, 0, 0, 0, 0, 0, 0, 0, 0, 0, 0, 0, 0, 0, 0, 0, 0]	0	13	3UTR	SPO21	sense
+	chrXV	234509	234516	-	TTCCCCC	2	flanking_window_reference_pA_signal	[0, 0, 0, 0, 0, 0, 0, 0, 0, 0, 0, 0, 0, 0, 0, 0, 0, 0, 0, 0, 0, 0, 0, 0, 0, 0, 0, 0, 0, 0, 0, 0, 0, 0, 0, 0, 0, 0, 0, 0, 0, 0, 0, 0, 0, 0, 0, 0, 0, 0, 0, 0, 0.464238221058, 2.32119110529, 0, 0, 0, 0, 0, 0.232119110529, 0, 0.232119110529, 0.464238221058, 0, 0, 0, 0, 0, 0, 0, 0, 0, 0, 0, 0, 0, 0.232119110529]	0	23	snoRNA	SNR81	sense
-	chrXV	33516	33523	-	CTAGCCG	2	flanking_window_reference_pA_signal	[0, 0, 0.464238221058, 0.464238221058, 0, 0.232119110529, 0, 0, 0.232119110529, 0, 0, 0, 0, 0.464238221058, 0, 0, 0, 0, 0, 0, 0.696357331587, 0, 0, 0, 0, 0, 0, 0, 0, 0, 0, 0, 0, 0, 0, 0, 0, 0, 0.464238221058, 0, 0, 0, 0, 0, 0.464238221058, 0, 0, 0.696357331587, 0, 0, 0, 0, 0, 0, 0, 0, 0.232119110529, 0, 0.232119110529, 0.232119110529, 0, 0, 0, 0, 0.232119110529, 0, 1.16059555264, 0, 0, 1.39271466…	0	-22	intergenic_region	INT_0_7584	sense
+	chrXV	1006902	1006909	-	TTAACAG	2	flanking_window_reference_pA_signal	[0.696357331587, 0, 0, 0, 8.35628797904, 0, 0, 0, 0, 0, 0.696357331587, 3.71390576846, 38.9960105688, 0, 6.49933509481, 0, 0.464238221058, 0.464238221058, 0.464238221058, 0.232119110529, 6.96357331587, 0, 0.464238221058, 19.9622435055, 0, 0, 0.232119110529, 0, 0.696357331587, 0, 0, 0, 0, 0.464238221058, 1.39271466317, 0, 0, 0, 0, 0, 0, 0, 0, 0, 0, 0, 0, 0, 0, 0, 0, 0, 0.232119110529, 0, 0, 0, 0, …	98.2155	-18	3UTR	GDS1	sense
+	chrXV	848226	848233	-	ATACACG	2	flanking_window_reference_pA_signal	[0, 0, 0, 0, 0, 0, 0, 0, 0, 0, 0, 0, 0, 0, 0, 0, 0, 0, 0, 0, 0, 0, 0, 0, 0, 0, 0, 0, 0, 0, 0, 0, 0.232119110529, 0, 1.85695288423, 0, 0, 0, 0, 3.01754843688, 0, 0, 0, 0, 2.78542932635, 0, 0, 0, 0, 0, 0, 0, 0, 0, 0, 0, 0, 0, 0.232119110529, 0.464238221058, 2.08907199476, 0, 0, 0, 0, 0.696357331587, 0, 1.16059555264, 8.12416886851, 0, 0, 3.01754843688, 8.35628797904, 0, 0, 0, 0.464238221058]	0	42	3UTR	YOR283W	sense
-	chrXV	722738	722745	-	TGACACG	2	flanking_window_reference_pA_signal	[0, 0.464238221058, 0, 0, 0, 0, 0, 0, 0.232119110529, 0, 0.464238221058, 0, 0, 0, 0, 0.232119110529, 0.696357331587, 0, 0, 0, 0, 0, 0, 0, 0, 0, 0, 0.232119110529, 0.232119110529, 0, 0, 0.232119110529, 0, 0, 0, 0, 0, 0, 0, 0, 0, 0, 0, 0, 0, 0.464238221058, 0, 0, 0, 0.464238221058, 0, 0.232119110529, 0, 0, 0, 0, 0, 0, 0, 0, 0, 0, 0, 0, 0, 0, 0, 0, 0, 0, 0, 0.232119110529, 0, 0, 0, 1.39271466317, 0]	0.208525	-28	antisense_CDS	INT_0_8122	sense
+	chrXV	533870	533877	+	TGCCCCG	2	flanking_window_reference_pA_signal	[0, 2.55331021582, 16.4804568475, 0, 0, 0.696357331587, 0.464238221058, 0, 1.16059555264, 6.49933509481, 0, 0, 0.232119110529, 0.232119110529, 0, 29.0148888161, 0, 0, 0, 6.26721598428, 0, 0.696357331587, 11.838074637, 0, 0, 0.232119110529, 0, 0, 0, 0, 0.464238221058, 0.696357331587, 0.464238221058, 0, 0.464238221058, 0, 0, 0.696357331587, 1.16059555264, 0, 0, 0, 0, 0, 0, 0, 0, 0, 0, 0, 0, 0, 0, 0…	72.3583	-15	3UTR	CEX1	sense
+	chrXV	571781	571788	+	TATCCCG	2	flanking_window_reference_pA_signal	[0, 0, 0, 0, 0, 0, 0, 0, 0, 0, 0, 0, 0, 0, 0, 0, 0.464238221058, 0, 0, 0, 0, 0, 0, 0, 0, 0, 0, 0, 0, 0, 0, 0, 0, 0, 0, 0, 0.696357331587, 0, 0, 0, 0, 0, 0, 0, 0, 0, 0, 0, 0, 0, 0, 0, 0, 0, 0, 0, 0, 0, 0, 0, 0, 0, 0, 0, 0, 0, 0, 0, 0, 0, 0, 0, 0, 0, 0, 0, 0]	0.208525	6	SUTs	SUT370	sense
+	chrXV	979765	979772	+	TTCCCTG	2	flanking_window_reference_pA_signal	[0.696357331587, 0, 0, 0.464238221058, 0, 0, 0, 0, 0, 0.232119110529, 0.232119110529, 0, 0.232119110529, 0, 0, 0, 0, 0, 0, 0, 0, 0, 0, 0, 0, 0, 0, 0, 0, 0, 0, 0, 0, 0, 0, 0, 0, 0, 0, 0, 0, 0, 0, 0, 0, 0, 0, 0, 0, 0, 0, 0, 0, 0, 0, 0, 0, 0, 0, 0, 0, 0, 0, 0, 0, 0, 0, 0, 0, 0, 0, 0, 0, 0, 0, 0, 0]	1.04263	-30	SUTs	SUT386	sense
-	chrXV	101232	101239	+	TTACTCA	2	flanking_window_reference_pA_signal	[0.232119110529, 0.232119110529, 0, 0, 0, 0, 0.928476442115, 0, 0, 0, 0, 0, 0, 0, 0, 0.696357331587, 0, 0, 0, 0, 0.696357331587, 0, 0, 0, 0, 0, 0, 0, 0, 0, 0, 0.232119110529, 0, 0, 0, 0.464238221058, 0, 0, 0, 0, 0, 1.16059555264, 0, 0, 0.232119110529, 0.232119110529, 0, 0, 0, 0, 0, 0, 0, 0, 0, 0, 0, 0, 0, 0.232119110529, 0, 0, 0, 0, 0, 0, 0, 0.232119110529, 0, 0.232119110529, 0.696357331587, 0, 0…	0	6	SUTs	XUT_15R-66	sense
+	chrXIV	703388	703395	-	GTACCCT	2	flanking_window_reference_pA_signal	[0, 0, 0, 0, 0, 0, 0, 0, 0, 0, 0, 0, 0, 0, 0, 0, 0, 0, 0, 0, 0, 0, 0, 0, 0, 0, 0, 0, 0, 0, 0, 0, 0, 0, 0, 0, 0, 0, 0, 0, 0, 0, 0, 0, 0, 0, 0, 0, 0, 0, 0, 0, 0, 0.928476442115, 0, 0, 0, 0, 0, 0, 0, 0, 0, 0, 0, 0, 0, 0, 0, 0, 0, 0.232119110529, 1.16059555264, 0, 0, 0, 0]	0	42	3UTR	AGA1	sense
-	chrXIV	481108	481115	-	TTTTCCG	2	flanking_window_reference_pA_signal	[0, 0, 0.464238221058, 0.696357331587, 0, 0, 0, 0, 0, 0.232119110529, 0, 0.696357331587, 6.96357331587, 0.464238221058, 0, 0, 0, 0, 0, 0, 0, 0, 0, 0, 0, 0, 0, 0, 0, 0, 0, 0, 0, 0, 0, 0, 0, 0, 0, 0, 0, 0, 0.232119110529, 0, 0, 0, 0, 0, 0, 0, 0, 0, 0, 0, 0, 0, 0, 0, 0, 0, 0, 0, 0, 0, 0, 0, 0, 0, 0, 0.696357331587, 0, 0, 2.55331021582, 2.78542932635, 0, 0, 0]	1.04263	35	intergenic_region	INT_0_7316	sense
+	chrXIV	366600	366607	-	TTAAACG	2	flanking_window_reference_pA_signal	[0, 0, 0, 0, 0, 0, 0, 0, 0, 0, 0, 0, 0, 0, 0, 0, 0.232119110529, 0, 0.464238221058, 0, 0.696357331587, 0, 0, 0, 0.232119110529, 0.464238221058, 0, 0, 0, 0, 0, 0, 0, 0.232119110529, 0.464238221058, 0, 0, 0, 0, 0, 0, 0, 0, 1.39271466317, 0.928476442115, 0, 0.696357331587, 0, 0, 0, 0, 0.232119110529, 0.464238221058, 0.232119110529, 1.16059555264, 0.232119110529, 1.16059555264, 3.48178665793, 3.71390…	1.45968	28	3UTR	YSF3	sense
-	chrXIV	394501	394508	-	TCACACG	2	flanking_window_reference_pA_signal	[0, 0, 0.464238221058, 0, 0, 0, 0, 0.232119110529, 0, 0, 0, 0, 0, 1.85695288423, 0, 0.696357331587, 0.464238221058, 0, 0, 0, 0, 0, 0.232119110529, 0, 0, 0, 0, 0, 0, 0, 0, 0, 0, 0, 0, 0, 0, 0, 0, 0, 0, 0, 0, 0, 0, 0, 0, 0, 0, 0, 0.232119110529, 0, 2.08907199476, 0, 0, 0, 0, 0, 0, 0, 0.232119110529, 0, 0, 0, 0, 0, 0, 0, 0.232119110529, 0, 0, 0, 0, 0, 0, 0, 0]	0.417051	-5	intergenic_region	INT_0_7253	sense
-	chrXIV	708362	708369	+	CTTCCCG	2	flanking_window_reference_pA_signal	[1.39271466317, 0, 0, 0, 0.696357331587, 0, 0, 3.48178665793, 3.01754843688, 0, 1.16059555264, 0, 0.464238221058, 22.0513155002, 87.2767855588, 0, 0, 0.232119110529, 0.928476442115, 6.73145420534, 0, 1.16059555264, 1.6248337737, 0, 1.39271466317, 0, 0.464238221058, 0.232119110529, 0.232119110529, 0, 0.928476442115, 1.16059555264, 0, 0.232119110529, 0, 0.464238221058, 0.464238221058, 0, 0.23211911…	0.208525	33	intergenic_region	INT_0_7498	sense
+	chrXIV	169794	169801	+	TTACACC	2	flanking_window_reference_pA_signal	[0, 0, 0, 0, 0, 0, 0, 0, 0, 0, 0, 0, 0, 0, 0, 0, 0, 0, 0, 0, 0, 0, 0, 0, 0, 0, 0, 0, 0, 0, 0, 0.696357331587, 0, 0.232119110529, 0, 0, 0, 0.232119110529, 0, 0, 0, 0.232119110529, 0, 0, 0, 0, 0, 0, 0, 0, 0, 0, 0, 0, 0, 0, 0, 0, 0, 0, 0, 0, 0, 0, 0, 0, 0, 0, 0, 0, 0, 0, 0, 0, 0, 0, 0]	1.04263	1	SUTs	XUT_14F-55	sense
+	chrXIV	456220	456227	+	CTACTCG	2	flanking_window_reference_pA_signal	[0, 0, 0, 0, 0, 0, 0.928476442115, 0, 0.464238221058, 0, 3.48178665793, 36.9069385741, 0, 0, 0, 3.71390576846, 0, 0, 0.232119110529, 0.232119110529, 3.2496675474, 9.98112175274, 0, 1.16059555264, 0, 0, 0, 0.232119110529, 0.464238221058, 0.232119110529, 0.696357331587, 2.32119110529, 0, 0, 0, 0.232119110529, 0, 0, 0, 0, 0, 0, 0, 0, 0, 0, 0, 0, 0, 0, 0, 0, 0, 0, 0, 0, 0, 0, 0, 0, 0, 0, 0, 0, 0, 0, …	65.894	-19	3UTR	NST1	sense
+	chrXIV	332334	332341	+	TTTCCAG	2	flanking_window_reference_pA_signal	[0, 0, 0, 0, 0, 0, 0, 0, 0, 0, 0.232119110529, 0, 0, 0, 0, 0, 0, 0, 0.696357331587, 0, 0, 0, 0, 0, 0, 0, 0, 0, 0, 0, 0, 0, 0, 0, 0, 0, 0, 0, 0, 0, 0, 0, 0, 0, 0, 0, 0, 0, 0.232119110529, 0, 0, 0, 0, 0, 0, 0, 0, 0, 0, 0, 0, 0, 0, 0, 0, 0, 0, 0, 0, 0, 0, 0, 0, 0, 0, 0, 0]	1.04263	-12	3UTR	INT_0_7198	sense
-	chrXIV	483103	483110	+	TTTACCG	2	flanking_window_reference_pA_signal	[0.464238221058, 0, 0, 0.232119110529, 0, 0, 0, 0, 0, 0, 0, 0, 0, 0, 0, 0, 0, 0, 0, 0, 0, 0, 0, 0, 0, 0, 0, 0, 0.232119110529, 0, 0, 0, 0, 0, 0, 0, 0, 0, 0, 0, 0, 0.232119110529, 0, 0, 0, 0, 0, 0, 0, 0, 0, 0, 0, 0, 0, 0, 0, 0, 0, 0, 0, 0, 0, 0, 0, 0, 0, 0, 0, 0, 0, 0, 0, 0, 0, 0, 0]	0	47	XUTs	XUT_14R-195	sense
+	chrXIV	441349	441356	+	TCGCCCG	2	flanking_window_reference_pA_signal	[0, 0, 0, 0, 0, 0, 0, 0, 0, 0, 0, 0, 0, 0, 0, 0, 0, 0, 0, 0, 0, 0, 0, 0, 0, 0, 0, 0, 0, 0, 0, 0, 0, 0, 0, 0, 0, 0, 0, 0, 0, 0.232119110529, 1.6248337737, 0, 0, 0, 0, 2.55331021582, 0, 0.232119110529, 0, 0, 0, 0, 0, 0, 0, 0, 0, 0, 0, 0, 0, 0, 0, 0, 0, 0, 0, 0, 0, 0, 0, 0, 0, 0, 0]	0	17	5UTR	XUT_14F-166	sense
+	chrXIV	37442	37449	+	TCACCTG	2	flanking_window_reference_pA_signal	[0, 0, 0, 0, 0, 0, 0, 0, 0, 0, 0, 0, 0, 0, 0, 0, 0, 0, 0, 0, 0, 0, 0, 0, 0, 0, 0, 0, 0, 0, 0, 0, 0, 0, 0, 0, 0, 0, 0, 0, 0, 0, 0, 0, 0, 0, 0, 0, 0, 0, 0, 0, 0, 0, 0, 0, 0, 0, 0, 0, 0, 0, 4.17814398952, 0, 0.928476442115, 0, 0, 0, 0, 0, 0, 0, 0, 0, 0, 0, 0]	0	32	CDS	VNX1	sense
-	chrXIV	91653	91660	+	GTACCCC	2	flanking_window_reference_pA_signal	[0, 0, 0.696357331587, 0, 0, 1.39271466317, 0, 0, 0.464238221058, 0, 0, 0.232119110529, 0, 0, 0, 0, 0, 0, 0, 0, 0, 0, 0, 0, 0, 0, 0, 0.232119110529, 0, 0, 0, 0, 0, 0, 0, 0, 0, 0, 0, 0, 0, 0, 0, 0, 0, 0, 0, 0, 0, 0, 0, 0, 0, 0, 0, 0, 0, 0, 0, 0, 0, 0, 0, 0, 0, 0, 0, 0, 0, 0, 0, 0, 0, 0, 0, 0, 0]	0.208525	42	intergenic_region	INT_0_7033	sense
+	chrXIV	366451	366458	+	TTACGCC	2	flanking_window_reference_pA_signal	[0, 0, 0, 0, 0, 0, 0, 0, 0, 0, 0, 0, 0, 0, 0, 0, 0, 0, 0, 0, 0, 0, 0, 0, 0, 0, 0, 0, 0, 0, 0, 0, 0, 0, 0, 0, 0.464238221058, 0, 0, 0, 0, 0, 0, 0, 0, 0, 0, 0, 0, 0, 0, 0, 0, 0, 0, 0, 0, 0, 0, 0, 0, 0, 0, 0, 0, 0, 0, 0, 0, 0, 0.464238221058, 0, 0, 0, 0, 0.232119110529, 0]	0	6	3UTR	YSF3	sense
+	chrXIV	480996	481003	+	TAACCCC	2	flanking_window_reference_pA_signal	[0, 0, 0, 0, 0, 0, 0, 0, 0, 0, 0, 0, 0, 0, 0, 0, 0, 0, 0, 0, 0, 0, 0, 0, 0, 0, 0, 0, 0, 0, 0, 0, 0, 0, 0, 0, 0, 0, 0, 0, 0, 0, 0, 0, 0, 0, 0, 0, 0, 0, 0, 0, 0, 0.464238221058, 0, 0, 0, 0.232119110529, 0.232119110529, 0, 0, 0, 0, 0, 0, 0, 2.32119110529, 0, 0, 0, 0, 0, 0, 0.232119110529, 0, 0, 0]	0	36	CDS	NIS1	sense
+	chrXIII	743546	743553	-	ATACACG	2	flanking_window_reference_pA_signal	[0, 0, 0, 0, 0.464238221058, 0, 0, 0, 0, 0.232119110529, 0, 0, 0, 1.6248337737, 10.6774790843, 0, 0, 0, 0.696357331587, 0, 0, 0, 0, 0.232119110529, 0.464238221058, 1.85695288423, 16.7125759581, 0, 0, 0, 0.464238221058, 0.928476442115, 0.696357331587, 0.464238221058, 0.928476442115, 0, 0.232119110529, 0, 6.73145420534, 27.3900550424, 14.8556230738, 0, 2.08907199476, 12.302312858, 0, 0.696357331587…	8.13249	9	3UTR	TAF9	sense
-	chrXIII	401324	401331	-	TGATCCG	2	flanking_window_reference_pA_signal	[0, 0, 0, 0, 0, 0, 0, 0.232119110529, 0, 0, 0, 0, 2.32119110529, 0, 0, 0, 0.232119110529, 0, 0, 0, 0, 0, 0.464238221058, 0, 0, 0, 0, 0, 0, 0, 0, 0, 0, 0, 0, 0.232119110529, 0, 0, 0, 0, 0, 0, 0, 0, 0, 0, 0, 0, 0, 0, 0, 0, 0, 0, 0, 0, 0, 0, 0, 0, 0, 0, 0, 0, 0, 0.464238221058, 0, 0, 0, 0, 0, 0, 0, 0, 0, 0, 0]	0	35	intergenic_region	INT_0_6568	sense
+	chrXIII	92023	92030	+	TTTTCCG	2	flanking_window_reference_pA_signal	[0, 0, 0, 0, 0, 0, 0, 0, 0, 0, 0, 0, 0, 0, 0, 0, 0, 0, 0, 0, 0, 0, 0, 0, 0, 0.232119110529, 0, 0, 0, 0.232119110529, 0.232119110529, 0.464238221058, 0.232119110529, 0, 0, 0, 0, 0, 0, 0, 0, 0, 0, 0, 0, 0, 0, 0, 0, 0, 0, 0, 0, 0, 0, 0, 0, 0, 0, 0, 0, 0, 0, 0, 0, 0, 0, 0, 0, 0, 0, 0, 0, 0, 0, 0, 0]	68.3963	1	intergenic_region	INT_0_6334	sense
-	chrXIII	442248	442255	+	TTTGCCG	2	flanking_window_reference_pA_signal	[0.928476442115, 1.39271466317, 0, 0, 0.232119110529, 0, 0, 0, 0, 0, 0, 1.6248337737, 0, 0, 0, 0, 0, 0, 0, 0.928476442115, 0, 0, 0, 3.01754843688, 18.8016479528, 0, 1.6248337737, 0, 0, 0, 0.232119110529, 0, 0, 0.232119110529, 0, 0, 0, 0, 0.232119110529, 0, 0, 0, 0, 0, 0, 0, 0, 0, 0, 0, 0, 0, 0, 0, 0, 0, 0, 0, 0, 0, 0, 0, 0, 0, 0, 0, 0, 0, 0, 0, 0, 0, 0, 0, 0, 0, 0]	0.208525	23	CDS	YMR086C-A	sense
+	chrXIII	746038	746045	+	TTTCCCA	2	flanking_window_reference_pA_signal	[0, 0, 0, 0, 0.232119110529, 0, 0, 0, 0, 0, 0, 0, 0, 0, 0, 0, 0, 0, 0, 0, 0, 0, 0, 0, 0, 0, 0, 0.232119110529, 0, 0, 0, 0, 0, 0, 0, 0, 0, 0, 0, 0, 0, 0.464238221058, 0, 0, 0, 0, 0.464238221058, 0, 0, 0, 0, 0, 0.232119110529, 0, 0, 0, 3.01754843688, 9.98112175274, 0, 0, 1.16059555264, 1.16059555264, 2.78542932635, 2.55331021582, 0, 3.2496675474, 0, 0, 0.232119110529, 0, 1.39271466317, 3.9460248789…	0.208525	27	3UTR	BCH1	sense
-	chrXIII	547507	547514	+	TTGCCAG	2	flanking_window_reference_pA_signal	[0, 0, 0, 0.464238221058, 2.78542932635, 0, 0, 0, 0, 1.39271466317, 0, 0, 0, 0, 0.232119110529, 0.232119110529, 0, 0, 0, 0, 0, 0, 0, 0, 0, 0, 0, 0, 0, 0, 0, 0, 0, 0, 0, 0, 0, 0, 0, 0, 0, 0, 0, 0, 0, 0, 0, 0, 0, 0, 0, 0, 0, 0, 0, 0, 0, 0, 0, 0, 0, 0, 0, 0, 0, 0, 0, 0, 0, 0, 0, 0, 0, 0, 0, 0, 0]	0	43	intergenic_region	INT_0_6679	sense
-	chrXIII	650978	650985	+	TTACACC	2	flanking_window_reference_pA_signal	[0, 0, 0.232119110529, 0, 0.464238221058, 0, 0.232119110529, 3.94602487899, 0, 2.08907199476, 0, 0.464238221058, 6.03509687375, 0, 0, 0, 0, 0, 0, 0, 0, 0, 0, 0, 0, 0, 0, 0, 0, 0, 0.232119110529, 0.696357331587, 0, 0, 0, 0, 0, 0, 0, 0, 0.232119110529, 0.232119110529, 0, 0, 0, 0, 0, 0, 0, 0, 0, 0, 0, 0, 0, 0, 0, 0, 0, 0, 0, 0, 0, 0, 0, 0, 0, 0, 0, 0, 0, 0, 0, 0, 0, 0, 0]	1.87673	35	intergenic_region	INT_0_6765	sense
-	chrXIII	743686	743693	+	TTCCGCG	2	flanking_window_reference_pA_signal	[0, 0, 0.464238221058, 0, 0, 0, 0, 1.39271466317, 4.17814398952, 0, 0, 0, 0.232119110529, 0, 0, 0, 0, 2.08907199476, 0, 0, 0, 0, 0, 0, 0, 0, 0, 0.232119110529, 0.464238221058, 0, 0, 0.464238221058, 0, 0, 0, 0, 0, 0, 0, 0, 0, 0, 0.232119110529, 0, 0, 0, 0, 0, 0, 0, 0, 0, 0, 0, 0, 0, 0, 0, 0, 0, 0, 0, 0, 0, 0, 0, 0, 0, 0, 0, 0, 0, 0, 0, 0, 0, 0]	0	39	intergenic_region	INT_0_6826	sense
-	chrXIII	226859	226866	+	TTGCGCG	2	flanking_window_reference_pA_signal	[0, 2.55331021582, 0, 0.928476442115, 0.464238221058, 1.39271466317, 0, 0, 0, 0.232119110529, 0, 0, 0, 0.696357331587, 2.78542932635, 0, 0, 2.08907199476, 5.80297776322, 0, 0.928476442115, 0.232119110529, 0, 3.48178665793, 0, 0, 0.232119110529, 0.232119110529, 0, 0.232119110529, 2.55331021582, 0, 0.464238221058, 0, 0.232119110529, 0, 0, 0, 0, 0, 0.232119110529, 0.232119110529, 0, 0, 0, 0, 0, 0, 0…	0.417051	29	3UTR	RPS17A	antisense
+	chrIV	1521962	1521969	-	TGACCCA	2	flanking_window_reference_pA_signal	[0, 0, 0, 0, 0, 0, 0, 0, 0, 0, 0, 0, 0, 0, 0, 0.232119110529, 0, 0, 0, 0, 0, 0.232119110529, 0, 0, 0, 0, 0.232119110529, 1.6248337737, 0, 0, 0, 0.232119110529, 0, 0, 0, 0.928476442115, 0, 0, 0, 0, 0, 0, 0, 0, 0, 0, 0, 0, 0, 0, 0, 0, 0, 0, 0, 0, 0, 0, 0, 0, 0, 0, 0, 0, 0, 0, 0, 0, 0, 0, 0, 0.232119110529, 0.232119110529, 0, 0, 0, 0]	0.208525	-3	SUTs	SUT085	sense
+	chrIV	255085	255092	-	TTATCAG	2	flanking_window_reference_pA_signal	[0, 0, 0, 0.232119110529, 0, 0, 0, 0.232119110529, 0, 0, 0, 0, 0, 0, 0, 0, 0, 0, 0, 0, 0, 1.16059555264, 0, 0, 0, 0, 0, 0, 0, 0, 0, 0, 0, 0, 0, 0, 0, 0, 0, 0, 0, 0, 0, 0, 0, 0, 0, 0, 0, 0, 0, 0, 0, 0, 0, 0, 0, 0, 0, 0, 0, 0, 0, 0, 0, 0, 0, 0, 0, 0, 0, 0, 0, 0, 0, 0, 0]	2.71083	-9	3UTR	YDL114W-A	sense
+	chrIV	1184453	1184460	-	TAAGCCG	2	flanking_window_reference_pA_signal	[0, 0, 0, 0, 0, 0, 0, 0, 0, 0, 0, 0, 0, 0.464238221058, 0, 0.232119110529, 0, 0, 0.696357331587, 0, 0, 0, 0, 0, 0, 0, 0, 0, 0, 0, 0, 0, 0, 0, 0, 0, 0, 0, 0, 0, 0, 0, 0, 0, 0, 0, 0, 0, 0, 0, 0, 0, 0, 0, 0, 0, 0, 0.696357331587, 0, 0, 0, 0, 0, 0, 0, 0.232119110529, 0, 0, 0.232119110529, 0, 0, 1.16059555264, 0, 0, 0, 0, 0]	0.417051	41	3UTR	TRR1	sense
+	chrIV	992997	993004	-	TTAACGG	2	flanking_window_reference_pA_signal	[0, 0, 0, 0, 0, 0, 0, 0, 0, 0, 0, 0, 0, 0, 0, 0, 0, 0, 0, 0, 0, 0, 0, 0, 0, 0, 0, 0, 0, 0, 0, 0, 0, 0, 0, 0, 0, 0, 0, 0, 0, 0, 0, 0, 0, 0, 0, 0, 0, 0, 0, 0, 0.464238221058, 0.464238221058, 0.232119110529, 1.85695288423, 1.39271466317, 3.48178665793, 2.55331021582, 0, 0, 0.696357331587, 0, 0, 0, 0, 0, 0, 0, 0, 0, 0, 0, 0, 0, 0, 0]	4.58756	27	tRNA_100_nt_downstream	INT_0_1776	sense
+	chrIV	329593	329600	-	CTACACG	2	flanking_window_reference_pA_signal	[0, 0, 0, 0, 0, 0, 0, 0, 0, 0, 0, 0, 0, 0, 0, 0, 0, 0, 0, 0, 0, 0, 0, 0, 0, 0, 0, 0, 0, 0, 0, 0, 0, 0, 0, 0, 0, 0, 0, 0, 0, 0, 0, 0.928476442115, 0, 0.232119110529, 0.696357331587, 0, 0, 0.696357331587, 0, 0, 0, 0.928476442115, 6.03509687375, 0, 0, 0, 0.464238221058, 35.978462132, 3.2496675474, 0, 0.464238221058, 0.232119110529, 4.17814398952, 0, 0, 0, 0, 0, 0, 0.928476442115, 0, 0, 0.23211911052…	0.208525	29	3UTR	CUT055	sense
-	chrIV	1402786	1402793	-	TTGCACG	2	flanking_window_reference_pA_signal	[0, 0.232119110529, 0, 0, 0, 0, 0, 1.16059555264, 0, 0, 0.696357331587, 2.55331021582, 0, 0, 0, 0, 0.232119110529, 0, 0, 0, 0, 0, 0, 0, 0, 0, 0, 0, 0, 0, 0, 0, 0, 0, 0, 1.16059555264, 0, 0, 0.232119110529, 0, 0, 0, 0, 0.464238221058, 2.55331021582, 0, 0, 0, 0, 0, 0, 0, 0, 0, 0, 0, 0, 0, 0.232119110529, 0, 0, 0, 0, 0, 0, 0, 0, 0, 0.232119110529, 0, 0, 0, 0, 0, 0, 0, 0]	0.417051	36	intergenic_region	INT_0_2071	sense
+	chrIV	217213	217220	+	TTACTAG	2	flanking_window_reference_pA_signal	[0, 0, 0, 0, 0, 0, 0, 0, 0, 0, 0, 0, 0, 0.232119110529, 0, 0.464238221058, 3.48178665793, 0, 4.41026310005, 0, 129.986701896, 0, 0, 0, 0, 94.9367162063, 0, 0, 0, 0, 0.928476442115, 6.73145420534, 0, 0, 1.6248337737, 0, 0, 0, 0.232119110529, 13.2307893001, 3.2496675474, 11.3738364159, 289.220411719, 0, 0, 4.87450132111, 0, 0.232119110529, 1.16059555264, 3.94602487899, 5.80297776322, 0, 0, 0.232119…	49.8376	12	3UTR	ARF2	sense
-	chrIV	1055987	1055994	+	TTCCACG	2	flanking_window_reference_pA_signal	[0.928476442115, 0, 0, 0, 0.696357331587, 0, 0, 0, 0.232119110529, 0, 0, 0, 0, 0, 0, 0, 0, 1.16059555264, 5.33873954216, 0, 0, 0, 0, 0, 0, 0, 0, 0, 0.464238221058, 0.232119110529, 0.464238221058, 35.2821048004, 0, 0, 0, 0, 0, 0.696357331587, 0, 0, 0, 0, 0, 0, 0, 0, 0, 0, 0, 0, 0, 0, 0, 0, 0, 0, 0, 0, 0, 0, 0, 0, 0, 0, 0, 0, 0, 0, 0, 0, 0, 0, 0, 0.232119110529, 0, 0, 0]	0	16	intergenic_region	INT_0_1822	sense
+	chrIV	521555	521562	+	TTATGCG	2	flanking_window_reference_pA_signal	[0, 0, 0, 0, 0, 0, 0, 0, 0, 0, 0, 0, 0, 0, 0, 0, 0, 0, 0, 0, 0, 0, 0, 0, 0, 0, 0, 0, 0, 0, 0, 0, 0, 0, 0, 0, 0, 0, 0, 0, 0, 0, 0, 0, 0, 0, 0, 0, 0, 0, 0, 0, 0, 0, 0, 0, 0, 0, 0, 0, 0, 0, 0, 0, 0, 0, 0, 0, 0, 0, 0, 0, 0, 2.32119110529, 0.232119110529, 0, 0]	0.208525	43	3UTR	YDR034W-B	sense
-	chrIV	372055	372062	+	TTACGCA	2	flanking_window_reference_pA_signal	[0, 0, 0, 0, 0, 0, 0.232119110529, 0, 0.464238221058, 1.6248337737, 0, 3.01754843688, 0, 0.928476442115, 38.0675341267, 64.2969936165, 0, 71.0284478218, 0, 2.08907199476, 0.232119110529, 3.2496675474, 94.2403588747, 0, 0, 7.65993064745, 11.6059555264, 19.0337670634, 0, 0, 0, 0, 0, 0, 0.232119110529, 0, 0, 0, 0, 0, 0, 0, 0, 0.232119110529, 0.232119110529, 0.464238221058, 0, 0, 0, 0.232119110529, 0…	0.208525	25	XUTs	XUT_4R-155	sense
-	chrIV	909637	909644	+	TCACCCC	2	flanking_window_reference_pA_signal	[0.232119110529, 2.32119110529, 0, 0, 0.232119110529, 0, 0.232119110529, 0, 0, 0, 0.696357331587, 0, 0, 0.232119110529, 0, 0, 0, 0, 0, 0, 0, 0, 0, 0, 0, 0, 0, 0, 0, 0, 0, 0, 0, 0, 0, 0, 0, 0.928476442115, 0, 0, 0, 1.6248337737, 0, 0, 0, 0, 0.232119110529, 0, 0.232119110529, 0, 0, 0, 0, 0, 0, 0, 0, 0, 0, 0, 0, 0, 0, 0, 0, 0, 0, 0, 0, 0, 0, 0, 0, 0, 0, 0, 0]	0	46	intergenic_region	INT_0_1713	sense
-	chrIV	1238144	1238151	+	TTACCAC	2	flanking_window_reference_pA_signal	[0, 0, 0, 0.464238221058, 1.6248337737, 0, 4.17814398952, 68.9393758271, 0, 0, 82.6344033483, 0, 0, 0, 0, 0, 0, 0, 0.696357331587, 3.01754843688, 0, 0.464238221058, 0, 0, 0, 0, 0.464238221058, 5.33873954216, 0, 0.232119110529, 2.78542932635, 9.98112175274, 0, 0, 9.51688353168, 0, 0, 0.464238221058, 0, 0, 0, 0.464238221058, 0, 0, 0, 0, 0, 0, 0, 0, 1.39271466317, 0, 0, 0.928476442115, 0, 0, 0, 0, 0…	1.04263	37	3UTR	INT_0_1949	sense
-	chrIV	372131	372138	+	TTCCCAG	2	flanking_window_reference_pA_signal	[0, 0, 0, 0, 0, 0, 0.232119110529, 0, 0, 0, 0, 0, 0, 0, 0, 0, 0, 0, 0, 0, 0, 0, 0, 0, 0, 0, 0, 0, 0, 0.232119110529, 0, 0, 0, 0, 0, 0, 0, 0, 0, 0, 0, 0, 0, 0, 0.232119110529, 0, 0, 0.928476442115, 0, 0, 0, 0, 0.464238221058, 0, 0, 0, 0, 0, 0, 0, 0, 0, 0, 0, 0, 0, 0, 0, 0, 0, 0, 0, 0, 0, 0, 0, 0]	0.208525	0	intergenic_region	INT_0_1331	sense
-	chrIV	217313	217320	+	GAACCCG	2	flanking_window_reference_pA_signal	[2.78542932635, 0, 0, 0.232119110529, 0, 0, 0.696357331587, 0, 0.232119110529, 3.71390576846, 0, 0.696357331587, 0, 0, 0.464238221058, 0, 0, 0, 0, 0, 0, 0, 0, 0, 0, 0, 0, 0, 0, 0, 0.232119110529, 0, 0, 0, 0, 0.928476442115, 0, 0, 0, 2.08907199476, 7.65993064745, 0, 0, 0, 0, 0, 0.232119110529, 1.85695288423, 0, 0.464238221058, 0, 0, 0, 0, 0.464238221058, 0, 0, 0, 0, 0, 0, 0.464238221058, 0, 0, 0, …	0	7	intergenic_region	INT_0_1205	sense
+	chrIV	1213646	1213653	+	TTACACT	2	flanking_window_reference_pA_signal	[0, 0, 0, 0, 0, 0, 0, 0, 0, 0, 0, 0, 0, 0, 0, 0, 0, 0, 0, 0, 0.696357331587, 6.96357331587, 0, 3.94602487899, 0, 0.928476442115, 0, 0.232119110529, 0, 0, 2.78542932635, 47.3522985479, 0, 12.9986701896, 0, 1.16059555264, 4.87450132111, 4.87450132111, 0, 0, 0.696357331587, 0, 0, 2.32119110529, 0, 0, 0, 0, 0, 0, 0, 0, 0.464238221058, 0.464238221058, 0, 0, 0, 0.232119110529, 2.78542932635, 3.24966754…	17.5161	1	3UTR	KEI1	sense
-	chrVIII	207369	207376	-	TTTCGCG	2	flanking_window_reference_pA_signal	[15.0877421844, 25.0688639371, 0.696357331587, 6.49933509481, 1.16059555264, 2.08907199476, 3.2496675474, 0.696357331587, 3.01754843688, 0.232119110529, 0.232119110529, 4.87450132111, 1.39271466317, 0, 0, 0, 0, 0, 0, 0, 0, 0, 0, 0, 0, 0, 0, 0, 0, 0, 0, 0, 0, 0, 0, 0, 0, 0, 0, 0, 0, 0, 0, 0, 0, 0, 0, 0, 0, 0, 0, 0, 0, 0, 0, 0, 0, 0, 0, 0, 0, 0, 0, 0, 0, 0, 0, 0, 0, 0, 0, 0, 0, 0, 0, 0, 0]	0.625576	46	CDS	YHR049C-A	sense
-	chrVIII	282558	282565	-	TTACCGT	2	flanking_window_reference_pA_signal	[0, 0.464238221058, 0, 0, 0, 0, 0, 0, 0, 0, 0, 0, 0, 0, 0, 0, 0, 0, 0, 0, 0, 0, 0, 0, 0, 0, 0, 0, 0, 0, 0, 0, 0, 0, 0, 0, 0, 0, 0, 0, 0, 0, 0, 0.464238221058, 0, 0, 0, 0, 0, 0.232119110529, 0.464238221058, 0, 0, 0, 1.39271466317, 0.464238221058, 0.464238221058, 1.16059555264, 1.39271466317, 0.464238221058, 0.232119110529, 0.464238221058, 0, 0, 0, 0, 0, 0, 0, 0, 0, 0, 0, 0, 0, 0, 0]	0.208525	-7	3UTR	GAR1	sense
-	chrVIII	384589	384596	+	TTCCACG	2	flanking_window_reference_pA_signal	[1.6248337737, 0, 0, 0, 0.928476442115, 0, 0.232119110529, 1.85695288423, 0, 0, 3.01754843688, 0, 2.08907199476, 26.2294594898, 0, 130.683059228, 0, 0, 0, 1.16059555264, 4.17814398952, 0, 0, 0, 1.16059555264, 0, 0.464238221058, 0, 1.16059555264, 0, 0, 0, 0, 0.232119110529, 0, 0, 0.232119110529, 0, 0, 0, 0, 0, 0.232119110529, 0, 0, 0.464238221058, 0, 0, 0, 0.696357331587, 1.85695288423, 0, 0, 0, 0…	0	32	SUTs	XUT_8R-189	sense
+	chrVIII	160572	160579	+	TTGACCG	2	flanking_window_reference_pA_signal	[0, 0, 0, 0, 0, 0, 0, 0, 0.232119110529, 0.232119110529, 0, 0, 0, 0, 0.696357331587, 0, 0.464238221058, 0, 0, 0, 0, 0, 0, 0, 0, 0.232119110529, 0, 0, 0, 0, 0, 0, 0, 0, 0, 0, 0, 0, 2.32119110529, 0, 0, 0, 0.464238221058, 2.78542932635, 2.55331021582, 36.6748194636, 0, 10.6774790843, 97.2579073116, 0, 5.33873954216, 6.96357331587, 16.0162186265, 45.7274647742, 34.5857474688, 0, 0.928476442115, 1.62…	2.50231	18	3UTR	THR1	sense
+	chrVIII	281341	281348	+	TTTCGCG	2	flanking_window_reference_pA_signal	[0, 0, 0, 0, 0, 0, 0, 0, 0, 0, 0, 0, 0, 0, 0, 0, 0, 0, 0, 0, 0, 0, 0, 0, 0, 0, 0.696357331587, 19.4980052844, 0, 0, 0, 0, 0.232119110529, 1.16059555264, 0.464238221058, 0, 0, 0, 0, 0.464238221058, 0, 0, 0.696357331587, 0, 0.232119110529, 0, 0, 0, 0, 0, 0, 0, 0, 0, 0, 0, 0, 0, 0, 0, 0, 0, 0, 0, 0, 0, 0, 0, 0, 0, 0, 0, 0, 0, 0, 0, 0]	0	-3	3UTR	RTC3	sense
+	chrVIII	410950	410957	+	TTTCCGG	2	flanking_window_reference_pA_signal	[0, 0, 0, 0, 0, 0, 0, 0, 0.928476442115, 0, 0, 0, 0.464238221058, 0, 0, 0, 0, 0, 2.08907199476, 1.6248337737, 1.6248337737, 1.39271466317, 0.696357331587, 0.696357331587, 0.232119110529, 1.16059555264, 0.464238221058, 0.232119110529, 0, 1.16059555264, 0.696357331587, 0.232119110529, 0, 0.696357331587, 0, 0, 0, 0, 0, 0, 0, 0, 0, 0.232119110529, 0.232119110529, 0, 0, 0, 0.232119110529, 2.7854293263…	13.9712	19	snoRNA_300_nt_upstream	YSP1	sense
+	chrVIII	332147	332154	+	TGACGCG	2	flanking_window_reference_pA_signal	[0, 0, 0.232119110529, 0, 0, 0, 0, 0.232119110529, 0, 0, 0, 0, 0, 0, 0, 0, 0.232119110529, 0, 0, 0, 0, 0, 5.57085865269, 0, 0, 2.78542932635, 0, 0, 0, 0, 0.232119110529, 1.16059555264, 0, 0, 0, 0, 0, 0, 0.232119110529, 0.232119110529, 0, 0, 2.78542932635, 1.39271466317, 0, 0, 0, 0, 0, 0, 0, 0.696357331587, 0, 0, 0, 0, 0, 0, 0, 0, 0, 0, 0, 0, 0, 0, 0, 0, 0, 0, 0, 0, 0, 0, 0, 0, 0]	2.50231	-8	3UTR	ERP5	sense
+	chrVIII	229173	229180	+	TTAGACG	2	flanking_window_reference_pA_signal	[0, 0, 0, 0, 0, 0, 0, 0, 0, 0, 0, 0, 0, 0, 0, 0, 0, 0, 0, 0, 0, 0, 0, 0, 0, 0, 0, 0, 0, 0, 0, 0, 0, 0, 0, 0, 0, 0, 0, 0, 0, 0, 0, 0, 0, 0, 0, 0, 0, 0, 0, 0, 0, 0.232119110529, 0, 0, 0, 0, 0, 0, 0, 0, 0, 0, 0, 0, 0, 0, 0, 0, 0, 0, 0, 0, 0, 0, 0.928476442115]	0	46	intergenic_region	INT_0_4204	sense
-	chrVIII	361883	361890	+	TTTCCCT	2	flanking_window_reference_pA_signal	[0, 0, 1.85695288423, 0, 0, 0, 0, 0, 0, 0, 0, 0, 0, 0.232119110529, 0, 0, 0, 0, 0, 0, 3.2496675474, 13.6950275212, 0, 0, 1.39271466317, 6.26721598428, 0, 0, 0.696357331587, 0, 0.696357331587, 0, 0, 0, 0, 0, 0, 0, 0, 0, 0, 0, 0, 0, 0, 0, 0, 0, 0, 0, 0, 0, 0, 0, 0, 0, 0, 0, 0, 0, 0, 0, 1.16059555264, 0, 0, 0, 0, 0, 0, 0, 0, 0, 0, 0, 0, 0, 0]	0	26	3UTR	INT_0_4298	sense
-	chrXVI	136579	136586	-	TTCCGCG	2	flanking_window_reference_pA_signal	[0, 0, 7.19569242639, 0, 37.6032959057, 122.558890359, 0, 0, 2.08907199476, 22.0513155002, 571.941488343, 704.481500455, 0, 3.01754843688, 2.32119110529, 27.6221741529, 694.964616923, 0, 17.6410524002, 0.232119110529, 0.928476442115, 3.94602487899, 0.232119110529, 0.464238221058, 3.2496675474, 6.49933509481, 0, 0, 0, 0, 0, 0, 0, 0, 0.696357331587, 0, 0.464238221058, 1.16059555264, 1.39271466317, …	0	36	intergenic_region	INT_0_8495	sense
+	chrXVI	857011	857018	-	TTATACG	2	flanking_window_reference_pA_signal	[0, 0, 0, 0, 0, 0, 0, 0, 0, 0, 0, 0, 0, 0, 0, 0, 0, 0, 0, 0, 0, 0, 0, 0, 0, 0, 0, 0, 0, 0, 0, 0, 0.232119110529, 0, 0, 0, 0, 0, 0, 0, 0, 0, 0, 0, 0, 0.464238221058, 0, 0, 0.232119110529, 0.696357331587, 0.232119110529, 0, 0.696357331587, 0.696357331587, 1.39271466317, 0.232119110529, 0.232119110529, 0, 0.464238221058, 0, 0.232119110529, 0, 0, 0, 0, 0, 0.464238221058, 0, 0, 0, 0, 0, 0.464238221058…	2.50231	24	tRNA_100_nt_downstream	INT_0_9050	sense
+	chrXVI	106850	106857	-	TTACCAC	2	flanking_window_reference_pA_signal	[0, 0, 0, 0, 0, 0, 0, 0, 0, 0, 0, 0, 0, 0, 0, 0, 0, 0, 0, 0, 0, 0, 0, 0.232119110529, 0, 0, 0, 0, 0, 0, 0, 0, 0, 0, 0, 0, 0, 0, 0, 0.464238221058, 0, 0.464238221058, 0, 0, 0.232119110529, 0.464238221058, 0, 0, 0, 0, 0, 0, 0, 0, 0, 0, 0.696357331587, 0, 0, 0, 1.85695288423, 0, 0, 0, 1.16059555264, 0, 0, 0, 0, 0, 0, 0, 0, 0, 0, 0, 0]	0	30	CDS	NSL1	sense
+	chrXVI	321875	321882	-	CTTCCCG	2	flanking_window_reference_pA_signal	[0, 0, 0.232119110529, 0.696357331587, 0, 0, 0, 0, 0, 0, 0, 0, 0, 0, 0, 0, 0, 0, 0, 0, 0, 0, 0, 0.232119110529, 0, 0, 0, 0, 0, 0, 0, 0, 0, 0, 0, 0, 0, 0, 0, 0, 0, 0, 0, 0, 0, 0, 0, 0, 0, 0, 0, 0, 0, 0, 0, 0, 0, 0, 0, 0, 0, 0, 0, 0, 0, 0, 0, 0, 0, 0, 0, 0, 0, 0, 0.464238221058, 0, 0]	1.6682	-27	intergenic_region	INT_0_8632	sense
+	chrXVI	860010	860017	+	TTATTCG	2	flanking_window_reference_pA_signal	[0, 0, 0, 0, 0, 0, 0, 0, 0, 0, 0, 0, 0, 0, 0, 0, 0, 0, 0, 0, 0, 0.232119110529, 0, 0, 0, 0, 0, 0.232119110529, 0.232119110529, 0, 0, 0.232119110529, 0, 0, 0, 0, 0, 0, 0.232119110529, 5.10662043163, 0, 2.32119110529, 2.55331021582, 9.28476442115, 4.17814398952, 1.39271466317, 2.55331021582, 1.85695288423, 16.9446950686, 0, 0, 0, 1.39271466317, 0, 0, 0.464238221058, 0, 0, 0, 0.232119110529, 0, 0, 0…	0.208525	18	3UTR	KRE6	sense
-	chrXVI	645419	645426	+	GCACCCG	2	flanking_window_reference_pA_signal	[0, 0.232119110529, 0, 0, 0, 0, 1.6248337737, 0, 0, 0, 0, 0, 0, 0, 0, 0, 0, 0, 0, 0, 0, 0, 0.232119110529, 0.232119110529, 0, 0, 0, 0, 0, 0, 0, 0, 0, 0, 0, 0, 0, 0, 0, 0, 0, 0, 0, 0, 0, 0, 0, 0, 0, 0, 0, 0, 0, 0, 0, 0, 0, 0, 0, 0, 0, 0, 0, 0, 0, 0, 0, 0, 0, 0, 0, 0, 0, 0, 0, 0, 0]	0	41	SUTs	SUT830	sense
-	chrXVI	482764	482771	+	ATACCCA	2	flanking_window_reference_pA_signal	[0, 0, 0, 0, 0, 0, 0, 0.232119110529, 2.08907199476, 0, 0, 0, 0.232119110529, 0.696357331587, 0, 0, 0, 0.464238221058, 0, 0, 0, 0.232119110529, 0, 0, 0, 0, 0, 0, 0, 0, 0, 0, 0, 0, 0, 1.16059555264, 0, 0, 0, 0, 0, 0.232119110529, 0, 0, 0, 0, 0, 0.232119110529, 0, 0, 0, 0, 0, 0, 0, 0, 0.464238221058, 0.232119110529, 0, 0, 0, 0, 0.232119110529, 0, 0, 0, 0, 0, 0, 0.232119110529, 0, 0, 0, 0, 0, 0.2321…	0.625576	39	SUTs	SUT818	sense
+	chrXVI	138366	138373	+	TTAAACG	2	flanking_window_reference_pA_signal	[0, 0, 0, 0.464238221058, 0, 0, 0, 0, 0.232119110529, 0, 0, 0, 0, 0, 0, 0, 0, 0, 0, 0, 0, 0, 0, 0, 0, 0, 0, 0.696357331587, 0, 0, 0, 0, 0, 0, 0, 0, 0, 0, 0, 0, 0, 0, 0, 0, 0, 0, 0, 0, 0, 0, 0, 0, 0, 0, 0, 0, 0, 0, 0, 0, 0, 0, 0, 0, 0, 0, 0, 0, 0, 0, 0, 0, 0, 0, 0, 0, 0]	0.208525	-3	3UTR	PCL8	sense
-	chrXVI	493052	493059	+	TTGCCCA	2	flanking_window_reference_pA_signal	[0, 0.232119110529, 0, 0, 0, 0, 0, 0, 0, 0, 0, 0, 0, 0, 0, 0, 0, 0, 0, 0, 0, 0, 0, 0, 0, 0, 0, 0, 0, 0, 0, 0, 0, 0, 0, 3.01754843688, 0, 0, 0, 0, 0, 0, 0, 0, 0, 0, 0, 0, 0, 0, 0, 0, 0, 0, 0, 0, 0, 0, 0, 0, 0, 0, 0, 0, 0, 0, 0, 0, 0, 0, 0, 0, 0, 0, 0, 0, 0]	0.834102	12	5UTR	PHO85	sense
-	chrXVI	444365	444372	+	TAAACCG	2	flanking_window_reference_pA_signal	[0, 0, 0, 0, 0, 0.232119110529, 0, 0, 0, 0, 0, 0, 0.232119110529, 0, 0, 0, 0, 0.464238221058, 0, 0.464238221058, 0, 0, 0, 0, 0, 0, 0, 0, 0, 0, 0, 0, 0, 0, 0, 0, 0, 0, 0, 0, 0, 0, 0, 0, 0, 0, 0, 0, 0, 0, 0, 0, 0, 0, 0, 0, 0, 0, 0, 0, 0, 0, 0, 0, 0, 0, 0.232119110529, 0, 0, 0, 0, 0, 0, 0, 0, 0, 0]	0.417051	30	CUTs	XUT_16R-184	sense
+	chrXVI	412053	412060	+	ACACCCG	2	flanking_window_reference_pA_signal	[0, 0, 0, 0, 0, 0, 0, 0, 0, 0, 0, 0, 0, 0, 0, 0, 0, 0, 0, 0, 0, 0, 0, 0, 0, 0, 0, 0, 0, 0.232119110529, 0, 1.39271466317, 0, 0, 0, 0, 0, 0, 0, 0, 0, 1.16059555264, 0.696357331587, 0, 2.08907199476, 0, 0, 0, 0, 0, 0, 0, 0, 0, 0, 0, 0, 0, 0, 0, 0, 0, 0, 0, 0, 0, 0, 0, 0, 0, 0, 0, 0, 0, 0, 0, 0]	0.208525	14	3UTR	GPI2	sense
-	chrVII	307271	307278	-	TTAATCG	2	flanking_window_reference_pA_signal	[0.232119110529, 0, 0, 0, 0, 0, 0, 0, 0, 0, 0, 0, 0, 0, 0.232119110529, 0, 0, 0, 0, 0.928476442115, 0.464238221058, 0, 0, 0, 0.696357331587, 2.08907199476, 0, 5.80297776322, 0, 0.232119110529, 0.696357331587, 5.57085865269, 0, 0, 3.2496675474, 0, 0, 1.39271466317, 0, 0, 0.232119110529, 0, 0, 0, 0, 0, 0, 0, 0, 0, 0, 0, 0, 0, 0, 0, 0, 0, 0, 0, 0, 0, 0, 0, 0, 0, 0, 0, 0, 0, 0, 0, 0, 0, 0, 0, 0]	0	20	intergenic_region	INT_0_3408	sense
+	chrVII	591968	591975	-	TTACTAG	2	flanking_window_reference_pA_signal	[0, 0, 0, 0, 0, 0, 0, 0, 0, 0, 0, 0, 0, 0, 0, 0, 0, 0, 0, 0, 0, 0, 0, 0, 0, 0, 0, 0, 0, 0, 0, 0, 0, 0.696357331587, 3.2496675474, 0, 0, 0, 0.464238221058, 0, 3.2496675474, 0, 1.6248337737, 0, 0, 0, 0, 0.464238221058, 0, 0, 0, 0, 2.32119110529, 0, 0, 0, 0, 0, 0, 0, 0, 0, 0, 0, 0, 0, 0, 0, 0, 0.232119110529, 0, 0, 0, 0, 0.232119110529, 0, 0]	0	4	3UTR	SCM4	sense
+	chrVII	422935	422942	-	TTCACCG	2	flanking_window_reference_pA_signal	[0, 0, 0, 0, 0.232119110529, 0, 0, 0, 0, 0, 0.464238221058, 0, 0, 0.232119110529, 0.464238221058, 0, 0.232119110529, 0, 0, 0, 0, 0, 0, 0, 0, 0, 0, 0, 0, 0, 0, 0, 0, 0, 0, 0, 0, 0, 0, 0, 0, 0, 0, 0, 0, 0, 0.464238221058, 0, 0, 0, 0, 0, 0, 0, 0, 0, 0, 0, 0, 0, 0, 0, 0, 0, 0, 0, 0, 0, 0, 0, 0, 0, 0.232119110529, 0, 0, 0, 0]	1.45968	-20	SUTs	SUT118	sense
+	chrVII	227631	227638	+	TTATCGG	2	flanking_window_reference_pA_signal	[0, 0, 0, 0, 0, 0.696357331587, 0, 0, 3.94602487899, 0, 0, 0, 0, 0, 0, 3.94602487899, 0, 0, 0, 0, 0, 0.232119110529, 0, 4.41026310005, 3.48178665793, 0, 1.16059555264, 0, 0.928476442115, 0, 12.302312858, 115.363197933, 0, 1.85695288423, 1.16059555264, 0.464238221058, 1.85695288423, 7.42781153692, 0, 1.39271466317, 0, 0, 0.928476442115, 9.05264531063, 0, 0, 0, 0, 0, 0, 0, 0.232119110529, 0, 0, 0, …	8.75807	1	3UTR	ARO2	sense
-	chrVII	592112	592119	+	TCGCCCG	2	flanking_window_reference_pA_signal	[0, 0, 0, 0, 0, 0, 0, 0.928476442115, 0, 4.87450132111, 0, 0, 0, 0.464238221058, 6.96357331587, 0, 0, 0.232119110529, 3.01754843688, 0, 2.55331021582, 0, 0, 0, 0.232119110529, 0.928476442115, 0.464238221058, 0, 0, 0, 3.71390576846, 0, 0, 0, 0, 0, 0.696357331587, 0, 0, 0, 0.232119110529, 1.16059555264, 0, 0, 0, 0, 0.232119110529, 0.696357331587, 0, 3.01754843688, 0, 0, 0, 0, 0, 0, 0, 0, 0, 0, 0, 0…	0	33	CDS	YGR050C	sense
-	chrVII	548019	548026	+	CTACCCA	2	flanking_window_reference_pA_signal	[0, 0, 0, 0, 0, 0.464238221058, 0, 0, 0, 0, 0, 0, 0, 0, 0, 0.232119110529, 0, 0, 0, 0, 0, 0, 0, 0, 0, 0, 0, 0, 0, 0, 0, 0, 0, 0, 0, 0, 0, 0, 0, 0, 0.232119110529, 0.696357331587, 0, 0, 0, 0, 0, 0.232119110529, 0.696357331587, 0, 0.696357331587, 0.232119110529, 3.71390576846, 0, 0, 0.696357331587, 0.696357331587, 0.232119110529, 0, 0.928476442115, 0, 0, 0, 1.85695288423, 0, 0, 0, 0, 0, 2.089071994…	0	-5	intergenic_region	INT_0_3606	sense
+	chrVII	217325	217332	+	TTAACGG	2	flanking_window_reference_pA_signal	[0, 0, 0, 0, 0, 0, 0, 0, 0, 0, 0, 0, 0, 0, 0, 0, 0, 0, 0, 0, 0, 0, 0, 0, 0, 0, 0, 0, 0, 0, 0, 1.16059555264, 0, 0, 0, 0, 4.64238221058, 0, 0, 0, 0, 0, 0, 0.232119110529, 0, 0, 0, 0, 3.2496675474, 13.9271466317, 0, 0, 0, 0, 0, 0, 0, 0, 1.85695288423, 0, 0, 0, 0, 0, 0, 0, 0, 0.232119110529, 0, 0.696357331587, 0, 0, 0, 0, 0.928476442115, 1.6248337737, 0]	0	19	CDS	PEX14	sense
-	chrVII	123403	123410	+	TTAAGCG	2	flanking_window_reference_pA_signal	[0.232119110529, 0, 0, 0, 0, 0, 0, 0, 0, 0, 0, 0, 0, 0, 0, 0, 0, 0, 0, 0, 0, 0, 0, 0, 0, 0, 0, 0, 0, 0, 0, 0, 0.232119110529, 0, 0, 0, 0, 0, 0, 0, 0, 0.464238221058, 0, 0, 0, 0, 0, 0, 0, 0, 0.232119110529, 0, 0, 0, 0, 0, 0, 0, 0, 0, 0, 0, 0, 0, 0, 0, 0, 0, 0, 0, 0, 0, 0, 0, 0, 0, 0]	0.834102	6	intergenic_region	INT_0_3282	sense
+	chrVII	830295	830302	+	ATACTCG	2	flanking_window_reference_pA_signal	[0, 0, 0, 0.232119110529, 0, 0, 0, 0, 0, 0, 0, 0, 0, 0, 0.464238221058, 0.464238221058, 0, 2.08907199476, 1.6248337737, 0, 1.39271466317, 0, 0, 0, 0.464238221058, 0, 0, 3.94602487899, 13.6950275212, 0, 0, 0.928476442115, 0, 0, 0, 0, 0, 0, 0, 0, 0.232119110529, 0.928476442115, 0, 0, 0, 0, 0.232119110529, 2.55331021582, 10.2132408633, 0, 0, 0, 0, 0.232119110529, 0, 0.696357331587, 0, 0.464238221058…	3.33641	-2	3UTR	MRPS35	sense
+	chrVII	254198	254205	+	TTACTCT	2	flanking_window_reference_pA_signal	[0, 0, 0, 0, 0, 0, 0, 0, 0, 0, 0, 0, 0, 0, 0, 0, 0, 0, 0, 0, 0, 0, 0, 0, 0, 0, 0, 0, 0, 0, 0, 0, 0, 0, 0, 0, 0.232119110529, 0, 0, 0, 0, 0, 0, 0, 0, 0, 0, 0.696357331587, 0, 0, 0, 0.232119110529, 0, 0, 0, 0, 0, 0, 0, 0, 0, 0, 0, 0, 0, 0, 0, 0, 0, 0, 0, 0, 0, 0, 0, 0, 0]	0.208525	17	intergenic_region	INT_0_3368	sense
-	chrVII	591049	591056	+	TTACGTG	2	flanking_window_reference_pA_signal	[0, 0.232119110529, 0.464238221058, 0, 0, 0, 0, 0, 0, 0, 0, 0, 0, 0, 0, 0, 0, 0, 0, 0, 0, 0, 0, 0, 0, 0, 0, 0, 0, 0, 0, 0, 0, 0, 0, 0, 0, 0, 0, 0, 0, 0, 0, 0, 0, 0, 0, 0, 0, 0, 0, 0, 0, 0, 0, 0, 0, 0, 0, 0, 0.232119110529, 0, 0, 0, 0, 0.464238221058, 0, 0, 0, 0, 0, 0, 0, 0, 0, 0, 0]	0	45	SUTs	XUT_7R-269	sense
-	chrVII	905912	905919	+	TTACAAG	2	flanking_window_reference_pA_signal	[0, 0, 0, 0.696357331587, 0.232119110529, 0, 0, 0, 0, 0, 0, 0, 0, 0, 0, 0, 0, 0, 0, 0, 0.232119110529, 0.696357331587, 0, 0, 0, 0, 0, 0, 0, 0, 0, 0, 0, 0, 0, 0, 0, 0, 0, 0, 0, 0, 0, 0, 0, 0, 0, 0, 0.232119110529, 0, 0, 0, 0, 0, 0, 0, 0, 0, 0, 0, 0, 0, 0, 0, 0, 0, 0, 0, 0, 0, 0.232119110529, 0, 0, 0, 0, 0, 0]	0	44	intergenic_region	INT_0_3890	sense
-	chrXI	178313	178320	-	TTCTCCG	2	flanking_window_reference_pA_signal	[0, 1.16059555264, 4.87450132111, 0, 0, 1.16059555264, 0, 0, 0, 0.696357331587, 0, 0.232119110529, 1.6248337737, 0, 0, 0, 0, 0, 0, 0, 0, 0, 0, 0, 0.232119110529, 0, 0, 0, 0, 0, 0, 0, 0, 0, 0, 0.928476442115, 0, 0, 0, 0, 0, 0, 0, 0, 0, 0, 0, 0, 0, 0, 0, 0, 0, 0, 0, 0, 0, 0, 0, 0, 0, 0, 0, 0, 0, 0, 0, 0, 0, 0, 0, 0, 0, 0, 0, 0, 0]	0	45	intergenic_region	INT_0_5135	sense
-	chrXI	552506	552513	-	TTGCTCG	2	flanking_window_reference_pA_signal	[3.2496675474, 0.232119110529, 0.232119110529, 0, 0.464238221058, 12.7665510791, 0, 0, 0, 0.232119110529, 0, 0, 0, 0, 0, 0.232119110529, 0, 0, 0, 0, 0, 0.464238221058, 3.01754843688, 0, 0, 0, 0, 0, 0, 0, 0, 0, 0, 0, 0, 0, 0, 0, 0, 0, 0.232119110529, 0, 0, 0, 0, 0, 0, 0, 0, 0, 0, 0, 0, 0.928476442115, 0, 0, 0, 0, 0, 0, 0, 0, 0, 0, 0, 0, 0, 0, 0, 0, 0, 0, 0, 0, 0, 0, 0]	0.625576	42	intergenic_region	INT_0_5419	sense
+	chrXI	491355	491362	-	TTCCTCG	2	flanking_window_reference_pA_signal	[0, 0, 0, 0, 0, 0, 0, 0, 0, 0, 0, 0, 0, 0, 0, 0, 0, 0, 0, 0, 0.928476442115, 0, 0, 0, 0, 0, 0.232119110529, 0, 0, 0, 0, 0, 0, 0, 0, 0, 0, 0, 0, 0, 0, 0, 0, 0, 0.232119110529, 0, 0.232119110529, 0.232119110529, 0.232119110529, 0, 0.232119110529, 0, 0, 0, 0, 0, 0, 0, 0, 0, 0, 0, 0, 0, 0, 0, 0, 0, 0, 0, 0, 0, 0, 0, 0, 0, 0]	5.00461	-10	5UTR	BCH2	sense
+	chrXI	82786	82793	-	TTCCACG	2	flanking_window_reference_pA_signal	[0, 0, 0, 0, 0, 0, 0, 0, 0, 0, 0, 0, 0, 0, 0, 0, 0, 0, 0, 0, 0, 0, 0, 0, 0, 0, 0, 0, 0, 0, 0, 0, 0, 0, 0, 0, 0, 0, 0, 0, 0, 0, 0, 0, 0, 0, 0, 0, 0, 0, 0, 0.232119110529, 0, 0, 0, 0, 0, 0, 0, 0, 0, 0, 0.232119110529, 0, 0, 0, 0, 0, 0, 0, 0, 0, 0, 0, 0.696357331587, 0, 0]	1.6682	44	3UTR	DPH2	sense
+	chrXI	178230	178237	+	TTAGCCT	2	flanking_window_reference_pA_signal	[0, 0.928476442115, 0, 0, 1.6248337737, 0, 1.85695288423, 0, 0, 0.232119110529, 0.696357331587, 0, 0, 0, 0, 0, 0.232119110529, 0.232119110529, 0, 0, 0, 0, 0, 0, 0, 0, 0, 0, 0, 0, 0, 0, 0, 0, 0, 0, 0, 0, 0, 0, 0, 0, 0, 0, 0, 0, 0.232119110529, 0, 0, 0, 0, 9.51688353168, 37.1390576846, 0, 0, 0, 0, 13.2307893001, 0, 8.12416886851, 0, 0, 0, 0.464238221058, 0.232119110529, 1.39271466317, 2.78542932635…	2.08525	22	3UTR	LTV1	sense
-	chrXI	99811	99818	+	AAACCCG	2	flanking_window_reference_pA_signal	[0.232119110529, 0.232119110529, 0, 0.696357331587, 10.9095981949, 0, 0, 0.232119110529, 3.2496675474, 0, 0, 0.232119110529, 0, 0, 0, 0, 0, 0, 2.55331021582, 0, 0.928476442115, 5.10662043163, 0, 0, 0, 0.232119110529, 0, 0, 0.464238221058, 0, 0.232119110529, 0, 0, 0, 0, 0, 0.464238221058, 0, 0, 0, 0, 0, 0, 0, 0, 0, 0, 0, 0, 0, 0, 0, 0, 0, 0, 0, 0, 0, 0, 0, 0, 0, 0, 0, 0, 0, 0, 0, 0, 0, 0, 0, 0, 0,…	0.417051	43	intergenic_region	INT_0_5080	sense
-	chrXI	106997	107004	+	TTTTCCG	2	flanking_window_reference_pA_signal	[5.10662043163, 0, 3.01754843688, 0, 0, 0.232119110529, 0, 0, 0, 0, 0, 0, 0.232119110529, 0, 0.232119110529, 0, 0, 64.2969936165, 0, 0, 0, 0, 0.928476442115, 0, 0.232119110529, 0.464238221058, 0.464238221058, 0, 0, 0, 0, 0, 0.232119110529, 0, 0, 0, 0, 0, 0, 0, 0, 0, 0.464238221058, 0, 0, 0, 0, 0, 0, 0, 0, 0, 0, 0, 0, 0, 0, 0, 0, 0, 0, 0, 0, 0, 0, 0, 0, 0, 0, 0, 0, 0, 0, 0, 0, 0, 0]	0	30	intergenic_region	INT_0_5080	sense
-	chrXI	280199	280206	+	CTACTCG	2	flanking_window_reference_pA_signal	[0, 0, 0.232119110529, 0, 0, 0, 0, 0, 0, 0, 0, 0, 0, 0, 0, 0, 0, 0, 0.232119110529, 0, 0, 0, 0, 0, 3.48178665793, 0, 0, 0.232119110529, 0, 0, 1.6248337737, 0, 0, 0, 0, 0.464238221058, 0, 0, 0, 0, 0, 0, 0, 0, 0, 0, 0, 0, 0.232119110529, 0, 0, 0, 0, 0, 0, 0, 0, 0, 0, 0.232119110529, 0, 0, 0, 0, 0, 0, 0, 0, 0, 0, 0, 0, 0, 0.232119110529, 0, 0, 0]	0	23	intergenic_region	INT_0_5216	sense
+	chrXI	379184	379191	+	ATACACG	2	flanking_window_reference_pA_signal	[0, 0, 0, 0, 0, 0, 0, 0, 0, 0.232119110529, 0, 0, 0, 0, 0, 0, 0, 0, 0, 0, 0, 0, 0, 0, 0, 0, 0, 0, 0, 0, 0, 0.464238221058, 0, 0, 0, 0, 0, 0.464238221058, 0, 0, 0, 0, 0, 0, 0, 0, 0, 0, 0, 0, 0, 0, 0, 0, 0, 0, 0, 0, 0, 0, 0, 0, 0, 0, 0, 0, 0, 0, 0, 0, 0, 0, 0, 0, 0, 0, 0]	0.208525	1	intergenic_region	INT_0_5298	sense
+	chrXI	465244	465251	+	TTACTCT	2	flanking_window_reference_pA_signal	[0, 0, 0, 0, 0, 0, 0, 0, 0, 0, 0, 0, 0, 0, 0, 0, 0, 0, 0, 0, 0, 0, 0, 0, 0, 0, 0, 0, 0, 0, 0, 5.10662043163, 0, 0, 0, 1.16059555264, 0.232119110529, 0, 0.464238221058, 0, 0.232119110529, 0, 0, 0, 0.464238221058, 6.73145420534, 0.696357331587, 0.232119110529, 0, 0.696357331587, 0.232119110529, 0.232119110529, 0.232119110529, 0.232119110529, 0, 0, 0, 0, 0, 0, 0, 0, 0, 0, 0, 0, 0, 0, 0, 0, 0, 0, 0, …	0	15	intergenic_region	INT_0_5360	sense
-	chrV	128412	128419	-	TTACCTT	2	flanking_window_reference_pA_signal	[0, 0, 0, 0, 0, 0, 0.696357331587, 5.80297776322, 0, 21.8191963897, 0, 0, 0, 1.6248337737, 0, 0, 12.7665510791, 0, 0, 0, 0, 0, 0, 0.232119110529, 0, 0.696357331587, 0, 0, 0, 0, 0, 0.464238221058, 0, 0, 0, 0, 0, 0, 0, 0.232119110529, 0, 0, 0, 0, 0, 0, 0, 0, 0, 0, 0, 0, 0.464238221058, 0, 0, 0, 0, 0.464238221058, 0, 0, 0, 0, 0, 0.232119110529, 0, 0, 1.6248337737, 0, 0, 5.80297776322, 0, 0, 0, 0, 1.…	0	38	CDS	YEL014C	sense
+	chrV	546562	546569	-	GTACACG	2	flanking_window_reference_pA_signal	[0, 0.232119110529, 0, 0, 0, 0, 0, 0, 0, 0.232119110529, 0.232119110529, 0, 0, 0.464238221058, 0.928476442115, 0, 1.39271466317, 0, 3.01754843688, 0, 0, 5.10662043163, 14.8556230738, 0, 0, 0, 0, 0, 0, 0, 0, 0, 0, 0, 0, 0, 0, 0, 0, 0, 0, 0, 1.16059555264, 0, 2.32119110529, 0, 0, 0.696357331587, 0.232119110529, 0.696357331587, 34.3536283583, 428.027639815, 0, 8.8205262001, 9.51688353168, 151.341660…	11.0518	21	3UTR	BMH1	sense
-	chrV	101537	101544	-	GTACCCA	2	flanking_window_reference_pA_signal	[0, 0, 12.5344319686, 71.4926860429, 0, 49.4413705426, 321.484968082, 0, 0, 14.1592657423, 0, 0, 0, 9.98112175274, 0, 5.57085865269, 4.17814398952, 0, 0.232119110529, 4.64238221058, 0, 0.232119110529, 1.16059555264, 0.464238221058, 0, 0, 0, 6.73145420534, 68.475137606, 0, 0, 1.6248337737, 2.32119110529, 8.58840708957, 0, 0, 0, 0.464238221058, 0, 0, 0, 0, 0, 0, 0, 0, 0, 0.232119110529, 0, 0.232119…	0	41	intergenic_region	INT_0_2607	sense
-	chrV	442422	442429	-	TAAACCG	2	flanking_window_reference_pA_signal	[0, 0, 0.232119110529, 0, 0, 0, 0, 0, 0, 0, 0, 0, 0, 0, 0, 0, 0, 0, 0, 0, 0, 0, 0, 0, 0, 0, 0, 0, 0, 0, 0, 0, 0, 0.232119110529, 0, 0, 0, 0, 0.232119110529, 0, 0, 0, 0, 0, 0, 0, 0, 0, 0, 0, 0, 0, 0, 0, 0, 0, 0.232119110529, 0, 0, 0, 0, 0, 0, 0, 0, 0, 0, 0, 0.232119110529, 0.232119110529, 0, 0, 0, 0, 0, 0, 0]	0	45	intergenic_region	INT_0_2896	sense
+	chrV	271517	271524	+	TTACTAG	2	flanking_window_reference_pA_signal	[0, 0, 0, 0.696357331587, 1.6248337737, 0, 0, 0, 0.464238221058, 0, 0, 0, 0, 0, 0, 0, 0, 0.928476442115, 0.232119110529, 0, 0, 0, 0, 0, 0, 0, 0.232119110529, 0.928476442115, 0, 0, 0, 0.232119110529, 0, 0, 2.55331021582, 0, 0.232119110529, 0, 0, 0, 0, 0.232119110529, 0, 0, 0, 0, 0, 0, 0, 0, 0, 0, 0, 0, 0, 0.464238221058, 0, 0, 0, 0, 0, 0, 0, 0, 0, 0, 0, 0, 0, 0, 0, 0, 0, 0, 0, 0, 0]	2.71083	4	SUTs	XUT_5F-129	sense
+	chrV	100373	100380	+	TCACCCA	2	flanking_window_reference_pA_signal	[0, 0, 0, 0, 0.232119110529, 0, 0, 0.464238221058, 0, 0, 0, 0, 0.464238221058, 0, 0.464238221058, 0.232119110529, 0.232119110529, 0, 0, 0, 0.464238221058, 0.464238221058, 0.696357331587, 0, 0, 0, 0, 0, 0, 0, 0.232119110529, 0, 0, 0, 0, 0, 0, 0, 0, 0, 0, 0, 0, 0, 0, 0, 0, 0, 0, 0, 0, 0, 0.232119110529, 0, 0, 0, 0, 0, 0, 0, 0, 0, 0, 0, 0, 0, 0, 0, 0, 0, 0, 0, 0, 0, 0, 0.232119110529, 0]	2.29378	-8	intergenic_region	INT_0_2608	sense
+	chrXII	820220	820227	-	TTATACG	2	flanking_window_reference_pA_signal	[0, 0, 0.464238221058, 13.4629084107, 0, 0, 0, 0, 0.232119110529, 0, 0, 0, 0, 0, 0, 0.232119110529, 0, 0, 0, 0.464238221058, 0, 0.696357331587, 0, 0, 0.464238221058, 1.39271466317, 0, 0, 0, 0, 0, 1.39271466317, 2.55331021582, 0, 4.17814398952, 0, 0, 0, 0, 0.232119110529, 0, 0.928476442115, 4.17814398952, 0, 0, 2.08907199476, 19.0337670634, 0, 0.232119110529, 1.85695288423, 40.6208443425, 94.00823…	9.17512	26	3UTR	RPL26A	sense
+	chrXII	612253	612260	-	CTTCCCG	2	flanking_window_reference_pA_signal	[0, 0, 0, 0, 0, 0, 0, 0, 0, 0, 0, 0, 0, 0, 0, 0, 0, 0, 0, 0, 0, 0, 0, 0, 0, 0, 0, 0, 0, 0, 0, 0, 0, 0, 0, 0, 0, 0, 0, 0, 1.16059555264, 0, 0, 0.232119110529, 0, 0, 0, 0, 0.928476442115, 0, 0, 0, 0, 0, 0, 0.928476442115, 0, 0, 0, 0, 0.232119110529, 0, 0.232119110529, 0, 0, 0, 0, 0, 0, 0, 0, 0, 0, 0, 0, 0, 0]	0	10	3UTR	TOP3	sense
+	chrXII	83441	83448	-	TAACCTG	2	flanking_window_reference_pA_signal	[0, 0, 0, 0, 0, 0, 0, 0, 0, 0, 0, 0, 0, 0, 0, 0, 0, 0, 0, 0, 0, 0, 0, 0, 0, 0, 0, 0, 0, 0, 0, 0, 0, 0, 0, 0, 0, 0, 0.232119110529, 0, 0.232119110529, 0, 0, 0, 0.232119110529, 0, 0, 0, 0, 0.696357331587, 0, 0, 0, 0, 0, 0, 0, 0, 0, 0, 0, 0, 0, 0, 0, 0, 0, 0, 0, 0, 0, 0, 0, 0, 0, 0, 0]	0.417051	19	CDS	FRA1	sense
-	chrXII	866984	866991	-	TTTCGCG	2	flanking_window_reference_pA_signal	[0.232119110529, 0.928476442115, 0, 0, 0, 0, 0.232119110529, 0.696357331587, 0, 0, 0.696357331587, 9.98112175274, 0, 0, 0, 0, 0, 0, 0, 0, 0, 0, 0, 0, 0, 0, 0, 0, 0, 0, 0, 0, 0, 0, 0, 0, 0, 0, 0, 0, 0, 0, 0, 0.232119110529, 0, 0, 0, 0, 0, 0, 0, 0, 0, 0, 0, 0, 0, 0.232119110529, 0, 0, 0, 0, 0, 0, 0, 0, 0, 0, 0, 0, 0, 0, 0, 0, 0, 0, 0]	0	36	intergenic_region	INT_0_6134	sense
-	chrXII	460453	460460	-	TTACCAA	2	flanking_window_reference_pA_signal	[0, 0.232119110529, 0, 0.232119110529, 0, 0.928476442115, 0, 0, 0, 0, 0, 0, 0, 0, 0, 0, 0, 0, 0, 0, 0, 0, 0, 0, 0, 0, 0, 0, 0, 0, 0, 0, 0, 0, 0, 0, 0, 0, 0, 0, 0, 0, 0, 0, 0, 0, 0, 0, 0, 0, 0, 0, 0, 0, 0, 0, 0, 0, 0, 0, 0, 0, 0.232119110529, 0, 0, 0, 0, 0, 0, 0.232119110529, 0, 0, 0, 0, 0, 0, 0]	0.208525	42	intergenic	NTS1-2	sense
+	chrXII	460502	460509	-	TTAACAG	2	flanking_window_reference_pA_signal	[0, 0, 0, 0.232119110529, 0, 0, 0, 0, 0, 0, 0.232119110529, 0, 0, 0, 0, 0, 0, 0, 0, 0, 0, 0, 0, 0, 0, 0, 0, 0, 0, 0, 0, 0, 0, 0, 0, 0, 0, 0, 0, 0, 0, 0, 0, 0, 0, 0, 0, 0, 0, 0, 0, 0, 0, 0, 0, 0.464238221058, 0.232119110529, 0, 0, 0, 0, 0, 0, 0, 0, 0, 0, 0, 0, 0, 0, 0, 0, 0, 0, 0, 0]	91.9597	25	XUTs	XUT_12F-188	sense
+	chrXII	818656	818663	-	GAACCCG	2	flanking_window_reference_pA_signal	[0, 0, 0, 0, 0, 0, 0, 0, 0, 0, 0, 0, 0, 0, 0, 0, 0, 0, 0, 0, 0, 0, 0, 0, 0, 0, 0, 0, 0, 0, 0, 0, 0, 0, 0, 0, 0, 0, 0, 0, 0, 0, 0, 0, 0, 0, 0, 0, 0, 0, 0, 0, 0, 0.696357331587, 0, 0, 0.232119110529, 0, 0, 0, 0, 0, 0, 0, 0.232119110529, 0, 0, 0, 0, 0, 0, 0, 0, 0, 0, 0, 0]	0.417051	23	tRNA	TRR4	sense
-	chrXII	460327	460334	+	TTACGCT	2	flanking_window_reference_pA_signal	[0.232119110529, 0.464238221058, 9.98112175274, 0, 0.464238221058, 0, 0, 0, 0, 2.32119110529, 0, 0, 0, 0, 0, 0, 0.232119110529, 0, 0.232119110529, 0, 0, 0, 0, 0, 0, 0, 0, 0, 0, 0, 0, 0, 0, 0, 0, 0, 0, 0, 0, 0, 0, 0, 0, 0, 0, 0, 0, 0, 0, 0, 0, 0, 0, 0, 0, 0, 0.232119110529, 0, 0, 0, 0, 0, 0, 0, 0, 0, 0, 0, 0, 0, 0, 0, 0, 0, 0, 0, 0]	0	45	intergenic	NTS1-2	sense
-	chrXII	88319	88326	+	TTTCCAG	2	flanking_window_reference_pA_signal	[0.696357331587, 0, 0, 1.85695288423, 2.55331021582, 17.4089332897, 0, 0, 0, 0, 0, 0, 0, 0, 0, 0, 0, 0, 0, 0, 0.464238221058, 0, 0, 0, 3.71390576846, 0.232119110529, 0, 1.39271466317, 4.64238221058, 0, 0.696357331587, 0, 0, 0, 0, 0, 0, 0, 0, 0, 0, 0, 0, 0, 0, 0, 0, 0, 0, 0, 0, 0, 0, 0.232119110529, 0, 0, 0, 0, 0, 0, 0, 0, 0, 0, 0, 0, 0.232119110529, 0, 0, 0, 0, 0, 0, 0, 0, 0, 0]	0	42	intergenic_region	INT_0_5555	sense
+	chrXII	434110	434117	+	TTCCCCC	2	flanking_window_reference_pA_signal	[0, 0, 0, 0, 0, 0, 0, 0, 0, 0, 0, 0, 0, 0, 0, 0, 0, 0, 0, 0, 0.232119110529, 0, 0, 0, 0, 0, 0, 0, 0.232119110529, 0, 0, 0, 0.464238221058, 0, 0, 0, 0.696357331587, 7.89204975798, 0, 2.08907199476, 0, 0, 0, 0.232119110529, 0, 0.464238221058, 0, 0, 0, 0.232119110529, 0, 0, 0, 0, 0, 0, 0.696357331587, 0, 0, 5.10662043163, 0, 0.232119110529, 0.696357331587, 11.1417173054, 0, 0.464238221058, 0, 0, 0, …	0.208525	33	3UTR	YLR146W-A	sense
+	chrXII	523476	523483	+	TGACCGG	2	flanking_window_reference_pA_signal	[0.232119110529, 0, 0, 0, 0, 0, 0.232119110529, 0, 0, 0, 0, 0, 0, 0, 0, 0.232119110529, 0, 0, 0, 0, 0, 0, 0.232119110529, 3.71390576846, 0, 0, 0, 0.232119110529, 2.78542932635, 0, 1.16059555264, 1.6248337737, 0, 0, 0, 0, 0.464238221058, 0, 0, 0, 0, 0, 0, 0, 0, 0, 0, 0, 0, 0, 0, 0.232119110529, 0, 0, 0.232119110529, 0.232119110529, 0, 0, 0, 0, 0, 0.232119110529, 0.464238221058, 0, 0, 0, 0, 0.23211…	4.17051	-7	intergenic_region	INT_0_5871	sense
+	chrXII	949518	949525	+	TTTCCTG	2	flanking_window_reference_pA_signal	[0, 0, 0, 0, 0, 0, 0, 0, 0, 0.232119110529, 0, 0, 0, 0.464238221058, 0, 0, 0, 0, 0.232119110529, 0, 0, 0, 0, 0, 0, 0, 0, 0, 0, 0, 0, 0, 0, 0, 0, 0, 0, 0, 0, 0.928476442115, 0, 0, 0, 0, 0, 0, 0, 0, 0, 0, 0, 0, 0, 0, 0, 0, 0, 0, 0, 0, 0, 0, 0, 0, 0, 0, 0, 0, 0, 0, 0, 0, 0, 0, 0, 0, 0]	0.208525	9	3UTR	BER1	sense
+	chrXII	641125	641132	+	TTACCAT	2	flanking_window_reference_pA_signal	[0, 0, 0, 0, 0, 0, 0, 0, 0, 0, 0, 0, 0, 0, 0, 0, 0, 0.464238221058, 0.928476442115, 0, 0, 0, 0, 0.232119110529, 0, 2.55331021582, 0, 0.232119110529, 0, 1.16059555264, 5.57085865269, 30.4076034793, 0, 4.87450132111, 1.39271466317, 0, 0, 2.08907199476, 6.73145420534, 15.3198612949, 0, 1.16059555264, 1.39271466317, 0, 0, 0.232119110529, 0.232119110529, 1.85695288423, 1.85695288423, 0, 0, 0, 0, 0, 0,…	1.25115	37	3UTR	SSP120	sense
-	chrXII	460560	460567	+	TTTGCCG	2	flanking_window_reference_pA_signal	[0, 0, 0, 0, 0, 0, 0, 0.464238221058, 0.232119110529, 0, 0, 0, 0, 0, 0, 0, 0, 0, 0, 0, 0, 0, 0, 0, 0, 0, 0, 0, 0, 0, 0, 0, 0, 0, 0, 0, 0, 0, 0, 0, 0, 0, 0, 0, 0, 0.232119110529, 0, 0, 0, 0, 0, 0, 0, 0, 0, 0, 0, 0, 0, 0, 0, 0, 0, 0, 0, 0, 0, 0, 0, 0, 0, 0, 0, 0, 0, 0.232119110529, 0]	0	40	intergenic	NTS1-2	sense
+	chrXII	899018	899025	+	GTACCCT	2	flanking_window_reference_pA_signal	[0.232119110529, 0, 1.16059555264, 0, 0, 0.232119110529, 0, 0, 0, 0, 0, 0, 0, 0, 0, 0, 0, 0, 0, 0, 0, 0, 0.232119110529, 0, 0.464238221058, 0, 0, 0, 0, 0, 0, 0, 0, 0, 0, 0, 0, 0, 0, 0, 0, 0, 0, 0, 0, 0, 0, 0, 0, 0, 0, 0, 0.232119110529, 0, 0, 0, 0, 0, 0, 0, 0, 0, 0, 0, 0, 0, 0, 0, 0, 0, 0, 0, 0, 0, 0, 0, 0]	2.91936	-28	snoRNA_300_nt_upstream	INT_0_6155	sense
-	chrXII	83835	83842	+	TTACCTT	2	flanking_window_reference_pA_signal	[0, 0, 14.3913848528, 0, 0, 2.55331021582, 0, 0, 5.80297776322, 0, 0, 6.73145420534, 0, 0, 2.55331021582, 5.80297776322, 0, 2.78542932635, 0.928476442115, 0, 0, 0, 0, 0.696357331587, 0.696357331587, 0, 3.94602487899, 0, 0, 0, 0, 0, 0, 5.33873954216, 0, 0, 0, 0, 0, 0, 0, 0.928476442115, 0, 0, 0, 0, 0, 0, 0, 0, 0, 0, 0, 0, 0, 0, 0, 0, 0, 0, 0, 0, 0, 0, 0, 0, 0, 0, 0, 0, 0, 0, 0, 0, 0, 0, 0]	0	45	intergenic_region	INT_0_5553	sense

## Sheet: Reb1p_passive_RNA_seq
cluster peak strand	cluster peak chromosome	motif start	motif end	motif_strand	motif_sequence	mismatches from consensus	category	criteria for calling site	total cluster signal	distance from motif boundary to cluster peak (bp)	type of region	gene name	gene strand
-	chrX	606542	606549	+	TTACCCG	0	flanking_reference_RNA_seq_expression_values	0.0129389	2.35352	N/A	SUTs	SUT643	sense
-	chrII	668759	668766	+	TTACCCG	0	flanking_reference_RNA_seq_expression_values	0	1.8459	N/A	CDS	TDP1	sense
+	chrXV	109613	109620	-	TTACCCG	0	flanking_reference_RNA_seq_expression_values	4.23564	3.55335	N/A	CDS	SHR5	sense
+	chrXV	837311	837318	-	TTACCCG	0	flanking_reference_RNA_seq_expression_values	1.57548	1.29213	N/A	intergenic_region	INT_0_8206	sense
+	chrXIV	340161	340168	+	TTACCCG	0	flanking_reference_RNA_seq_expression_values	5.43116	4.84548	N/A	CDS	PGA1	sense
+	chrXIV	502347	502354	+	TTACCCG	0	flanking_reference_RNA_seq_expression_values	38.4925	33.6876	N/A	CDS	SUN4	sense
+	chrXIV	335878	335885	+	TTACCCG	0	flanking_reference_RNA_seq_expression_values	2.75677	2.07663	N/A	5UTR	SUT328	sense
+	chrXIV	108280	108287	+	TTACCCG	0	flanking_reference_RNA_seq_expression_values	6.40716	4.98392	N/A	CDS	POP3	sense
+	chrXIII	560786	560793	-	TTACCCG	0	flanking_reference_RNA_seq_expression_values	4.09116	2.76884	N/A	CDS	OSW5	sense
-	chrIV	787500	787507	-	TTACCCG	0	flanking_reference_RNA_seq_expression_values	0	2.49196	N/A	CDS	SEC5	sense
-	chrIV	78091	78098	-	TTACCCG	0	flanking_reference_RNA_seq_expression_values	0.0146645	1.43057	N/A	intergenic_region	INT_0_1107	sense
-	chrIV	949604	949611	+	TTACCCG	0	flanking_reference_RNA_seq_expression_values	0.147496	1.8459	N/A	CDS	PRP28	sense
+	chrIV	176497	176504	+	TTACCCG	0	flanking_reference_RNA_seq_expression_values	1.88385	1.56901	N/A	CDS	YDL156W	sense
-	chrVIII	53288	53295	+	TTACCCG	0	flanking_reference_RNA_seq_expression_values	0	1.61516	N/A	CDS	YHL026C	sense
-	chrXVI	583616	583623	-	TTACCCG	0	flanking_reference_RNA_seq_expression_values	0.109976	4.19941	N/A	CDS	YPR010C-A	sense
-	chrXVI	517141	517148	+	TTACCCG	0	flanking_reference_RNA_seq_expression_values	0	1.33827	N/A	5UTR	VTC3	sense
+	chrXVI	682070	682077	+	TTACCCG	0	flanking_reference_RNA_seq_expression_values	1.45299	1.15368	N/A	CDS	UBA3	sense
+	chrXVI	682609	682616	+	TTACCCG	0	flanking_reference_RNA_seq_expression_values	6.09491	5.3531	N/A	CDS	ISA2	sense
-	chrXVI	592872	592879	+	TTACCCG	0	flanking_reference_RNA_seq_expression_values	0	36.4564	N/A	CDS	TIF6	sense
-	chrXVI	542191	542198	+	TTACCCG	0	flanking_reference_RNA_seq_expression_values	0	2.6304	N/A	CDS	TFC8	sense
-	chrIII	147218	147225	-	TTACCCG	0	flanking_reference_RNA_seq_expression_values	0	5.07621	N/A	CDS	CWH43	sense
+	chrIII	266321	266328	+	TTACCCG	0	flanking_reference_RNA_seq_expression_values	13.7976	12.4137	N/A	CDS	ABP1	sense
+	chrVII	750844	750851	-	TTACCCG	0	flanking_reference_RNA_seq_expression_values	4.85195	3.41491	N/A	CDS	SYF2	sense
+	chrVII	144576	144583	-	TTACCCG	0	flanking_reference_RNA_seq_expression_values	1.83166	1.33827	N/A	3UTR	IME4	sense
-	chrXI	441040	441047	+	TTACCCG	0	flanking_reference_RNA_seq_expression_values	0	15.1364	N/A	CDS	VPS1	sense
+	chrXI	470748	470755	+	TTACCCG	0	flanking_reference_RNA_seq_expression_values	6.35756	5.86072	N/A	CDS	FCJ1	sense
+	chrXI	572399	572406	+	TTACCCG	0	flanking_reference_RNA_seq_expression_values	2.08957	1.66131	N/A	CDS	MET1	sense
+	chrXI	493250	493257	+	TTACCCG	0	flanking_reference_RNA_seq_expression_values	3.00303	2.44581	N/A	CDS	BCH2	sense
-	chrV	533238	533245	+	TTACCCG	0	flanking_reference_RNA_seq_expression_values	0	1.06139	N/A	CDS	BRR2	sense
-	chrV	192226	192233	+	TTACCCG	0	flanking_reference_RNA_seq_expression_values	0	1.79975	N/A	CDS	SPC25	sense
+	chrXII	41052	41059	+	TTACCCG	0	flanking_reference_RNA_seq_expression_values	4.63113	3.87638	N/A	CDS	LDB18	sense
+	chrXII	169585	169592	+	TTACCCG	0	flanking_reference_RNA_seq_expression_values	4.10626	3.09188	N/A	CDS	LOT6	sense
+	chrIX	382359	382366	-	TTACCCT	1	flanking_reference_RNA_seq_expression_values	2.46608	1.98434	N/A	CDS	RPR2	sense
+	chrIX	268943	268950	+	TAACCCG	1	flanking_reference_RNA_seq_expression_values	2.52905	1.47672	N/A	CDS	MET30	sense
-	chrIX	99697	99704	+	TTTCCCG	1	flanking_reference_RNA_seq_expression_values	0.0444228	1.47672	N/A	3UTR	CSM2	sense
-	chrX	663858	663865	-	TGACCCG	1	flanking_reference_RNA_seq_expression_values	0	1.79975	N/A	3UTR	INT_0_4965	sense
-	chrX	180168	180175	-	GTACCCG	1	flanking_reference_RNA_seq_expression_values	0.00172523	2.30737	N/A	5UTR	PBS2	sense
+	chrX	241712	241719	-	TTACCCT	1	flanking_reference_RNA_seq_expression_values	1.59273	1.38442	N/A	3UTR	SAP185	sense
+	chrX	706098	706105	+	TTACCCT	1	flanking_reference_RNA_seq_expression_values	28.4164	23.3044	N/A	CDS	BAT2	sense
+	chrX	192324	192331	+	TTACCCA	1	flanking_reference_RNA_seq_expression_values	1.73419	1.10754	N/A	CDS	YJL118W	sense
-	chrII	392002	392009	-	TTACCCT	1	flanking_reference_RNA_seq_expression_values	0.147497	5.39925	N/A	CDS	YBR076C-A	sense
+	chrII	628160	628167	-	TTACCCT	1	flanking_reference_RNA_seq_expression_values	5.21422	4.06097	N/A	CDS	MCM7	sense
-	chrII	615274	615281	-	TGACCCG	1	flanking_reference_RNA_seq_expression_values	0.00948879	5.44539	N/A	CDS	YBR196C-B	sense
+	chrII	458825	458832	-	TTACCCT	1	flanking_reference_RNA_seq_expression_values	4.47328	3.23032	N/A	CDS	YBR109W-A	sense
+	chrII	739570	739577	+	TTCCCCG	1	flanking_reference_RNA_seq_expression_values	8.81113	1.98434	N/A	CDS	TSC10	sense
-	chrII	60038	60045	+	TTACCCT	1	flanking_reference_RNA_seq_expression_values	0.0508905	201.987	N/A	CDS	RPL23A	sense
-	chrII	376212	376219	+	TTACGCG	1	flanking_reference_RNA_seq_expression_values	0.125503	1.47672	N/A	3UTR	INT_0_484	sense
-	chrVI	184017	184024	-	GTACCCG	1	flanking_reference_RNA_seq_expression_values	0	4.75318	N/A	CDS	YFR018C	sense
-	chrVI	173482	173489	+	TTACCCT	1	flanking_reference_RNA_seq_expression_values	0.0120766	2.35352	N/A	CDS	CMK1	sense
-	chrVI	184143	184150	+	TTACCCT	1	flanking_reference_RNA_seq_expression_values	0	3.32261	N/A	CDS	YFR018C	sense
-	chrVI	224786	224793	+	TTATCCG	1	flanking_reference_RNA_seq_expression_values	0.0487347	38.4869	N/A	3UTR	PHO4	sense
-	chrVI	224494	224501	+	TTACCCT	1	flanking_reference_RNA_seq_expression_values	1.57203	70.9285	N/A	CDS	QCR6	sense
+	chrXV	220285	220292	-	TTACCCT	1	flanking_reference_RNA_seq_expression_values	2.36085	1.8459	N/A	CDS	ARG1	sense
+	chrXV	853975	853982	-	TAACCCG	1	flanking_reference_RNA_seq_expression_values	2.17022	1.56901	N/A	CDS	YOR289W	sense
-	chrXV	639711	639718	-	TTACCCT	1	flanking_reference_RNA_seq_expression_values	0.5611	1.29213	N/A	CDS	YOR161C-C	sense
+	chrXV	1004860	1004867	+	TTACCCT	1	flanking_reference_RNA_seq_expression_values	7.53626	2.76884	N/A	5UTR	GDS1	sense
+	chrXV	109380	109387	+	TGACCCG	1	flanking_reference_RNA_seq_expression_values	2.89564	1.7536	N/A	CDS	SHR5	sense
+	chrXV	168545	168552	+	TGACCCG	1	flanking_reference_RNA_seq_expression_values	1.55478	1.15368	N/A	5UTR	ATG19	sense
-	chrXV	948789	948796	+	TTACCCA	1	flanking_reference_RNA_seq_expression_values	0	11.1215	N/A	CDS	ALA1	sense
-	chrXV	605902	605909	+	TTACCCT	1	flanking_reference_RNA_seq_expression_values	0.0543429	35.9488	N/A	CDS	PNO1	sense
-	chrXIV	216427	216434	-	TTACCCT	1	flanking_reference_RNA_seq_expression_values	0	19.7972	N/A	CDS	PDR16	sense
+	chrXIV	459594	459601	-	TTACCCT	1	flanking_reference_RNA_seq_expression_values	2.27718	1.79975	N/A	CDS	TOP2	sense
+	chrXIV	335709	335716	-	TTACCCA	1	flanking_reference_RNA_seq_expression_values	2.11631	1.8459	N/A	5UTR	SUT328	sense
+	chrXIV	289091	289098	+	TCACCCG	1	flanking_reference_RNA_seq_expression_values	2.49023	2.16893	N/A	CDS	SWT21	sense
-	chrXIV	373447	373454	+	TTACCGG	1	flanking_reference_RNA_seq_expression_values	0.364865	6.64522	N/A	CDS	YNL134C	sense
-	chrXIV	317897	317904	+	TTACCCT	1	flanking_reference_RNA_seq_expression_values	0	1.8459	N/A	3UTR	PSD1	sense
-	chrXIV	350012	350019	+	TGACCCG	1	flanking_reference_RNA_seq_expression_values	0	1.98434	N/A	CDS	ALF1	sense
+	chrXIII	413581	413588	+	TTACCCA	1	flanking_reference_RNA_seq_expression_values	1.84288	1.38442	N/A	intergenic_region	INT_0_6578	sense
+	chrXIII	819980	819987	+	TTACCCT	1	flanking_reference_RNA_seq_expression_values	7.34434	1.43057	N/A	3UTR	DSK2	sense
-	chrIV	451590	451597	-	TTACCCT	1	flanking_reference_RNA_seq_expression_values	0	5.39925	N/A	CDS	NTH1	sense
+	chrIV	677752	677759	-	TTACCCT	1	flanking_reference_RNA_seq_expression_values	5.8288	3.27646	N/A	CDS	FOB1	sense
+	chrIV	544425	544432	-	CTACCCG	1	flanking_reference_RNA_seq_expression_values	1.86703	1.56901	N/A	SUTs	XUT_4F-267	sense
-	chrIV	417922	417929	-	TTACCCC	1	flanking_reference_RNA_seq_expression_values	0	5.3531	N/A	CDS	OSH2	sense
+	chrIV	1378651	1378658	-	TTACCCC	1	flanking_reference_RNA_seq_expression_values	3.18546	2.58425	N/A	CDS	TOM1	sense
-	chrIV	1195295	1195302	+	TTATCCG	1	flanking_reference_RNA_seq_expression_values	0	3.13802	N/A	3UTR	BCP1	sense
-	chrIV	239691	239698	+	TTACACG	1	flanking_reference_RNA_seq_expression_values	0	2.26122	N/A	5UTR	HNT1	sense
-	chrIV	1429167	1429174	+	TCACCCG	1	flanking_reference_RNA_seq_expression_values	0	1.10754	N/A	CDS	RIB3	sense
-	chrIV	1429469	1429476	+	TAACCCG	1	flanking_reference_RNA_seq_expression_values	0	1.93819	N/A	CDS	RIB3	sense
+	chrIV	599893	599900	+	TTACCCT	1	flanking_reference_RNA_seq_expression_values	1.52416	1.19983	N/A	3UTR	RAD55	sense
-	chrIV	363038	363045	+	TTACCCT	1	flanking_reference_RNA_seq_expression_values	0	13.8904	N/A	CDS	SLC1	sense
+	chrIV	129572	129579	+	TTACCCT	1	flanking_reference_RNA_seq_expression_values	27.2692	19.8434	N/A	CDS	TFP1	sense
-	chrVIII	115552	115559	-	TTACTCG	1	flanking_reference_RNA_seq_expression_values	0.124638	3.13802	N/A	3UTR	TIM10	sense
-	chrVIII	98611	98618	+	ATACCCG	1	flanking_reference_RNA_seq_expression_values	0.829791	1.10754	N/A	CDS	SHU1	sense
+	chrXVI	883257	883264	-	TTACCAG	1	flanking_reference_RNA_seq_expression_values	34.9047	1.52286	N/A	5UTR	INT_0_9072	sense
-	chrXVI	832097	832104	-	TTACCCC	1	flanking_reference_RNA_seq_expression_values	0	1.61516	N/A	CDS	URN1	sense
-	chrXVI	666140	666147	-	TCACCCG	1	flanking_reference_RNA_seq_expression_values	0.016821	2.67655	N/A	CDS	YPR053C	sense
-	chrXVI	425382	425389	-	CTACCCG	1	flanking_reference_RNA_seq_expression_values	0	7.33744	N/A	CDS	YPL067C	sense
+	chrXVI	340019	340026	-	TTACCCT	1	flanking_reference_RNA_seq_expression_values	11.4592	8.62956	N/A	CDS	CAR1	sense
-	chrXVI	454324	454331	-	TTACCCA	1	flanking_reference_RNA_seq_expression_values	0.304055	3.92253	N/A	CDS	YPL056C	sense
-	chrXVI	457208	457215	+	TTACCCT	1	flanking_reference_RNA_seq_expression_values	0	7.56817	N/A	CDS	KTR6	sense
+	chrIII	51672	51679	-	TTACCCT	1	flanking_reference_RNA_seq_expression_values	15.3209	12.6905	N/A	3UTR	GLK1	sense
+	chrIII	51265	51272	+	TCACCCG	1	flanking_reference_RNA_seq_expression_values	12.2036	10.1063	N/A	3UTR	GLK1	sense
+	chrVII	905654	905661	-	TAACCCG	1	flanking_reference_RNA_seq_expression_values	3.41793	2.26122	N/A	CDS	YCH1	sense
+	chrVII	676849	676856	-	TTACCCT	1	flanking_reference_RNA_seq_expression_values	2.10208	1.7536	N/A	CDS	TPC1	sense
+	chrVII	576740	576747	-	TTTCCCG	1	flanking_reference_RNA_seq_expression_values	4.38443	3.83023	N/A	3UTR	KSS1	sense
+	chrVII	547389	547396	-	TGACCCG	1	flanking_reference_RNA_seq_expression_values	6.47185	5.2608	N/A	CDS	YGR031W	sense
-	chrVII	1026213	1026220	+	TTACCCT	1	flanking_reference_RNA_seq_expression_values	0.103075	3.96868	N/A	CDS	FOL2	sense
+	chrVII	272983	272990	+	CTACCCG	1	flanking_reference_RNA_seq_expression_values	2.86502	2.49196	N/A	CDS	MET13	sense
+	chrVII	681267	681274	+	TAACCCG	1	flanking_reference_RNA_seq_expression_values	3.66893	3.18417	N/A	CDS	ASK10	sense
+	chrVII	271411	271418	+	TCACCCG	1	flanking_reference_RNA_seq_expression_values	5.19094	3.92253	N/A	CDS	SCS3	sense
+	chrVII	271810	271817	+	TGACCCG	1	flanking_reference_RNA_seq_expression_values	4.00145	1.01524	N/A	CDS	SCS3	sense
+	chrVII	689871	689878	+	TAACCCG	1	flanking_reference_RNA_seq_expression_values	2.85208	1.7536	N/A	CDS	TEL2	sense
-	chrXI	382960	382967	-	CTACCCG	1	flanking_reference_RNA_seq_expression_values	0	16.4285	N/A	CDS	MAE1	sense
+	chrXI	101121	101128	-	TTACCCT	1	flanking_reference_RNA_seq_expression_values	7.68289	5.99916	N/A	CDS	FAS1	sense
-	chrXI	264510	264517	+	TTATCCG	1	flanking_reference_RNA_seq_expression_values	0.0940184	2.12278	N/A	SUTs	SUT665	sense
+	chrXI	651310	651317	+	TTACGCG	1	flanking_reference_RNA_seq_expression_values	1.67425	1.29213	N/A	intergenic_region	INT_0_5493	sense
-	chrXI	65820	65827	+	TTACCCT	1	flanking_reference_RNA_seq_expression_values	0	1.15368	N/A	CDS	MNN4	sense
-	chrXI	580281	580288	+	TTACCCA	1	flanking_reference_RNA_seq_expression_values	0.119031	1.15368	N/A	CDS	YKR075C	sense
-	chrXI	229150	229157	+	TTACCCC	1	flanking_reference_RNA_seq_expression_values	0	6.36834	N/A	CDS	KTI12	sense
-	chrV	570123	570130	-	TTACCCT	1	flanking_reference_RNA_seq_expression_values	0.0306221	1.19983	N/A	intergenic_region	INT_0_2993	sense
-	chrV	192066	192073	-	TCACCCG	1	flanking_reference_RNA_seq_expression_values	0	2.49196	N/A	CDS	SPC25	sense
-	chrV	192170	192177	-	CTACCCG	1	flanking_reference_RNA_seq_expression_values	0	1.79975	N/A	CDS	SPC25	sense
+	chrV	526720	526727	+	TTCCCCG	1	flanking_reference_RNA_seq_expression_values	3.55853	2.7227	N/A	3UTR	ADK2	sense
-	chrV	280242	280249	+	TTACCCT	1	flanking_reference_RNA_seq_expression_values	0.237636	9.96784	N/A	CDS	HOR2	sense
-	chrXII	320209	320216	-	TGACCCG	1	flanking_reference_RNA_seq_expression_values	0.0504621	11.4445	N/A	5UTR	ALT1	sense
+	chrXII	437199	437206	-	TTACCCT	1	flanking_reference_RNA_seq_expression_values	2.19179	1.8459	N/A	CDS	PEP3	sense
-	chrXII	500474	500481	-	TTGCCCG	1	flanking_reference_RNA_seq_expression_values	0	4.384	N/A	3UTR	APS1	sense
-	chrXII	65476	65483	-	TTACCCC	1	flanking_reference_RNA_seq_expression_values	0	2.35352	N/A	3UTR	ENT4	sense
+	chrXII	504210	504217	-	TAACCCG	1	flanking_reference_RNA_seq_expression_values	1.4172	1.24598	N/A	CDS	YLR173W	sense
-	chrXII	212278	212285	-	TTGCCCG	1	flanking_reference_RNA_seq_expression_values	0.0530457	1.01524	N/A	3UTR	MLH2	sense
+	chrXII	83513	83520	-	TTACCCT	1	flanking_reference_RNA_seq_expression_values	6.59045	4.61474	N/A	CDS	FRA1	sense
-	chrXII	197626	197633	-	TTACCCT	1	flanking_reference_RNA_seq_expression_values	0.0362299	31.1956	N/A	CDS	AAT2	sense
+	chrXII	402021	402028	-	TTACCCT	1	flanking_reference_RNA_seq_expression_values	6.69612	5.81457	N/A	CDS	DIP2	sense
-	chrXII	514473	514480	-	TGACCCG	1	flanking_reference_RNA_seq_expression_values	0.111701	48.5009	N/A	CDS	YLR179C	sense
+	chrXII	844049	844056	+	TTACCCT	1	flanking_reference_RNA_seq_expression_values	4.07908	1.70745	N/A	3UTR	RSC2	sense
-	chrXII	130000	130007	+	TTACCCT	1	flanking_reference_RNA_seq_expression_values	0	2.35352	N/A	CDS	PSR1	sense
+	chrXII	399484	399491	+	TTACCCT	1	flanking_reference_RNA_seq_expression_values	2.06067	1.43057	N/A	3UTR	DCN1	sense
+	chrIX	382280	382287	-	TTACCGA	2	flanking_reference_RNA_seq_expression_values	2.79386	2.30737	N/A	CDS	RPR2	sense
+	chrIX	143002	143009	+	TTCACCG	2	flanking_reference_RNA_seq_expression_values	6.54344	4.52244	N/A	CDS	HIS5	sense
+	chrX	451943	451950	-	TTAGGCG	2	flanking_reference_RNA_seq_expression_values	15.076	10.7985	N/A	CDS	SUI2	sense
-	chrX	182001	182008	-	TTTCCAG	2	flanking_reference_RNA_seq_expression_values	0.324324	1.33827	N/A	3UTR	YJL127C-B	sense
+	chrX	339286	339293	-	TTATCCT	2	flanking_reference_RNA_seq_expression_values	4.66434	1.15368	N/A	CDS	TDH1	sense
-	chrX	291235	291242	+	TTACCTC	2	flanking_reference_RNA_seq_expression_values	0	7.8912	N/A	3UTR	PRY3	sense
-	chrX	690714	690721	+	ACACCCG	2	flanking_reference_RNA_seq_expression_values	0	1.43057	N/A	3UTR	INT_0_4980	antisense
+	chrII	170602	170609	-	TTATCAG	2	flanking_reference_RNA_seq_expression_values	11.1556	1.06139	N/A	5UTR	LSM2	sense
-	chrII	668810	668817	-	ATACCAG	2	flanking_reference_RNA_seq_expression_values	0	1.10754	N/A	CDS	TDP1	sense
-	chrII	768881	768888	-	CTACGCG	2	flanking_reference_RNA_seq_expression_values	0	4.43015	N/A	3UTR	SSH1	sense
-	chrII	465876	465883	-	TTTCCCA	2	flanking_reference_RNA_seq_expression_values	0	1.79975	N/A	5UTR	CYC8	sense
+	chrII	628259	628266	-	TTAGCGG	2	flanking_reference_RNA_seq_expression_values	3.78021	2.53811	N/A	CDS	MCM7	sense
+	chrII	172012	172019	+	TTTCACG	2	flanking_reference_RNA_seq_expression_values	3.88156	3.18417	N/A	3UTR	RRN10	sense
-	chrII	576286	576293	+	TTACCTT	2	flanking_reference_RNA_seq_expression_values	0	1.52286	N/A	3UTR	NPL4	sense
-	chrVI	184171	184178	-	GTACCTG	2	flanking_reference_RNA_seq_expression_values	0	3.13802	N/A	CDS	YFR018C	sense
+	chrVI	90289	90296	+	CTACCAG	2	flanking_reference_RNA_seq_expression_values	2.97586	2.44581	N/A	SUTs	SUT103	sense
+	chrVI	97517	97524	+	GTACTCG	2	flanking_reference_RNA_seq_expression_values	10.1757	2.44581	N/A	CDS	GAT1	sense
+	chrI	158942	158949	-	TTTGCCG	2	flanking_reference_RNA_seq_expression_values	2.71795	1.06139	N/A	5UTR	SEN34	sense
-	chrI	33187	33194	-	TAACCCC	2	flanking_reference_RNA_seq_expression_values	0.0340728	1.93819	N/A	SUTs	XUT_1R-18	sense
-	chrXV	427305	427312	-	TAAACCG	2	flanking_reference_RNA_seq_expression_values	0.182002	1.06139	N/A	5UTR	YOR052C	sense
-	chrXV	761561	761568	-	TTTCCGG	2	flanking_reference_RNA_seq_expression_values	0	1.33827	N/A	3UTR	ISU2	sense
+	chrXV	109654	109661	-	CCACCCG	2	flanking_reference_RNA_seq_expression_values	3.95919	2.81499	N/A	CDS	SHR5	sense
-	chrXV	271385	271392	-	TTACGCA	2	flanking_reference_RNA_seq_expression_values	0.0573627	3.13802	N/A	3UTR	YAP7	sense
+	chrXV	304982	304989	-	TTTCCTG	2	flanking_reference_RNA_seq_expression_values	15.6289	13.8442	N/A	5UTR	PLB3	sense
-	chrXV	921519	921526	+	TTATCCT	2	flanking_reference_RNA_seq_expression_values	0	1.66131	N/A	CDS	PRO2	sense
+	chrXV	448515	448522	+	TTACCTA	2	flanking_reference_RNA_seq_expression_values	13.9624	10.1986	N/A	3UTR	CYT1	sense
+	chrXV	424480	424487	+	TTCCGCG	2	flanking_reference_RNA_seq_expression_values	1.94639	1.61516	N/A	SUTs	XUT_15F-200	sense
+	chrXV	882395	882402	+	CTTCCCG	2	flanking_reference_RNA_seq_expression_values	3.28466	2.44581	N/A	3UTR	YOR302W	sense
+	chrXV	1010916	1010923	+	TTGACCG	2	flanking_reference_RNA_seq_expression_values	2.56657	2.07663	N/A	CDS	HAP5	sense
+	chrXV	717165	717172	+	TAACCAG	2	flanking_reference_RNA_seq_expression_values	22.444	14.4441	N/A	CDS	MCA1	sense
+	chrXV	256817	256824	+	CTACCCT	2	flanking_reference_RNA_seq_expression_values	3.66462	2.90729	N/A	CDS	YOL036W	sense
+	chrXV	159396	159403	+	ATACCTG	2	flanking_reference_RNA_seq_expression_values	4.65873	1.98434	N/A	CDS	YOL086W-A	sense
+	chrXV	424538	424545	+	TTCCGCG	2	flanking_reference_RNA_seq_expression_values	1.91835	1.47672	N/A	SUTs	XUT_15F-200	sense
+	chrXV	32475	32482	+	TTAAACG	2	flanking_reference_RNA_seq_expression_values	5.28237	4.4763	N/A	SUTs	SUT350	sense
+	chrXIV	502391	502398	-	TCACCTG	2	flanking_reference_RNA_seq_expression_values	37.8654	33.6876	N/A	CDS	SUN4	sense
-	chrXIV	22787	22794	-	TTACACC	2	flanking_reference_RNA_seq_expression_values	0	1.01524	N/A	3UTR	MDJ2	sense
-	chrXIV	217458	217465	-	TTCCGCG	2	flanking_reference_RNA_seq_expression_values	0	1.70745	N/A	3UTR	ELA1	sense
-	chrXIV	350079	350086	-	TTCCCGG	2	flanking_reference_RNA_seq_expression_values	0	2.12278	N/A	CDS	ALF1	sense
+	chrXIV	357337	357344	+	TTTCACG	2	flanking_reference_RNA_seq_expression_values	2.5256	1.52286	N/A	5UTR	MEP2	sense
+	chrXIV	340033	340040	+	TGACTCG	2	flanking_reference_RNA_seq_expression_values	5.81414	4.75318	N/A	CDS	PGA1	sense
-	chrXIV	318129	318136	+	TCACCAG	2	flanking_reference_RNA_seq_expression_values	0.0905682	10.7062	N/A	CDS	PSD1	sense
-	chrXIII	627824	627831	-	ATACACG	2	flanking_reference_RNA_seq_expression_values	0	1.79975	N/A	5UTR	SSO2	sense
+	chrXIII	804583	804590	-	ATTCCCG	2	flanking_reference_RNA_seq_expression_values	13.1744	9.13718	N/A	CDS	TMA23	sense
+	chrXIII	283881	283888	-	TTACCTT	2	flanking_reference_RNA_seq_expression_values	8.89911	8.16809	N/A	5UTR	INT_0_6474	sense
-	chrXIII	759037	759044	+	TTCCGCG	2	flanking_reference_RNA_seq_expression_values	0	1.24598	N/A	5UTR	YMR244C-A	sense
+	chrXIII	434435	434442	+	TCACTCG	2	flanking_reference_RNA_seq_expression_values	2.22068	1.61516	N/A	intergenic_region	INT_0_6594	sense
+	chrXIII	774208	774215	+	CTCCCCG	2	flanking_reference_RNA_seq_expression_values	1.96881	1.33827	N/A	SUTs	SUT315	sense
-	chrXIII	854730	854737	+	TTCTCCG	2	flanking_reference_RNA_seq_expression_values	0.0901381	1.15368	N/A	SUTs	XUT_13R-389	sense
+	chrXIII	873188	873195	+	TTATTCG	2	flanking_reference_RNA_seq_expression_values	1.67597	1.38442	N/A	SUTs	XUT_13F-375	sense
+	chrXIII	353335	353342	+	TTTCCCT	2	flanking_reference_RNA_seq_expression_values	3.57189	2.7227	N/A	3UTR	ARG80	sense
+	chrIV	176418	176425	-	TTACCAC	2	flanking_reference_RNA_seq_expression_values	1.45213	1.01524	N/A	CDS	YDL156W	sense
+	chrIV	600136	600143	-	TTACCTT	2	flanking_reference_RNA_seq_expression_values	2.18445	1.61516	N/A	3UTR	RAD55	sense
+	chrIV	1337860	1337867	-	GTTCCCG	2	flanking_reference_RNA_seq_expression_values	2.05722	1.19983	N/A	3UTR	THI74	sense
+	chrIV	599985	599992	+	TTCCCCA	2	flanking_reference_RNA_seq_expression_values	2.14736	1.61516	N/A	3UTR	RAD55	sense
+	chrIV	1011764	1011771	+	TTGCACG	2	flanking_reference_RNA_seq_expression_values	1.4241	1.19983	N/A	5UTR	INT_0_1791	sense
+	chrIV	704288	704295	+	TCACTCG	2	flanking_reference_RNA_seq_expression_values	1.94552	1.61516	N/A	3UTR	SWF1	sense
-	chrIV	976662	976669	+	GTACCCA	2	flanking_reference_RNA_seq_expression_values	0.270846	7.0144	N/A	3UTR	SWM1	sense
-	chrIV	393425	393432	+	TTTCCTG	2	flanking_reference_RNA_seq_expression_values	0.142323	2.12278	N/A	CDS	SLM3	sense
-	chrIV	62099	62106	+	TTTCCCT	2	flanking_reference_RNA_seq_expression_values	0.227716	1.01524	N/A	3UTR	FMP45	sense
+	chrIV	599782	599789	+	TTACCTA	2	flanking_reference_RNA_seq_expression_values	1.41935	1.10754	N/A	3UTR	RAD55	sense
+	chrIV	601947	601954	+	TTGCCCT	2	flanking_reference_RNA_seq_expression_values	191.887	160.408	N/A	3UTR	SED1	sense
+	chrVIII	108138	108145	-	TCAGCCG	2	flanking_reference_RNA_seq_expression_values	9.61332	5.53769	N/A	CDS	QCR10	sense
+	chrVIII	175351	175358	-	ATGCCCG	2	flanking_reference_RNA_seq_expression_values	3.11818	2.35352	N/A	CDS	YHR032W-A	sense
-	chrXVI	350145	350152	-	TTTTCCG	2	flanking_reference_RNA_seq_expression_values	0	1.01524	N/A	3UTR	CUT894	sense
-	chrXVI	831953	831960	-	TTACGCT	2	flanking_reference_RNA_seq_expression_values	0	1.52286	N/A	3UTR	URN1	sense
-	chrXVI	451720	451727	-	TTGCTCG	2	flanking_reference_RNA_seq_expression_values	0.0957422	10.4293	N/A	3UTR	SUR1	sense
-	chrXVI	583015	583022	-	TGACGCG	2	flanking_reference_RNA_seq_expression_values	0.00819486	1.38442	N/A	3UTR	YPR010C-A	sense
+	chrXVI	900374	900381	-	ACACCCG	2	flanking_reference_RNA_seq_expression_values	10.2982	8.72186	N/A	CDS	SMX3	sense
+	chrXVI	900226	900233	-	TCACCGG	2	flanking_reference_RNA_seq_expression_values	16.4233	9.32177	N/A	CDS	SMX3	sense
+	chrXVI	758216	758223	-	TGACCCA	2	flanking_reference_RNA_seq_expression_values	2.60151	1.29213	N/A	3UTR	RGC1	sense
+	chrXVI	361596	361603	-	TTTCCCA	2	flanking_reference_RNA_seq_expression_values	3.84921	1.89204	N/A	CDS	ELP4	sense
+	chrXVI	411656	411663	-	TAACACG	2	flanking_reference_RNA_seq_expression_values	1.25374	1.01524	N/A	3UTR	GPI2	sense
-	chrXVI	593429	593436	+	TTACTCT	2	flanking_reference_RNA_seq_expression_values	0.00258785	3.41491	N/A	3UTR	DSS4	sense
-	chrXVI	887947	887954	+	TCACCCA	2	flanking_reference_RNA_seq_expression_values	0	3.46105	N/A	3UTR	YPR174C	sense
+	chrXVI	812958	812965	+	TTCTCCG	2	flanking_reference_RNA_seq_expression_values	1.98348	1.15368	N/A	SUTs	XUT_16F-324	sense
-	chrXVI	927915	927922	+	GTACCCA	2	flanking_reference_RNA_seq_expression_values	0.375647	1.70745	N/A	3UTR	OPT2	sense
-	chrIII	210649	210656	-	TTTCCCT	2	flanking_reference_RNA_seq_expression_values	0.127229	2.81499	N/A	3UTR	BUD23	sense
+	chrIII	157931	157938	-	ATACCGG	2	flanking_reference_RNA_seq_expression_values	1.81571	1.52286	N/A	SUTs	XUT_3F-71	sense
+	chrIII	228888	228895	+	TTTCCCA	2	flanking_reference_RNA_seq_expression_values	1.81872	1.19983	N/A	3UTR	HCM1	sense
-	chrVII	648913	648920	-	ATACGCG	2	flanking_reference_RNA_seq_expression_values	0.0172523	1.56901	N/A	5UTR	RPL11B	sense
-	chrVII	141995	142002	-	ATTCCCG	2	flanking_reference_RNA_seq_expression_values	0	2.39966	N/A	CDS	YGL193C	sense
+	chrVII	516445	516452	-	TTTCCCT	2	flanking_reference_RNA_seq_expression_values	3.32908	2.44581	N/A	CDS	SNU71	sense
-	chrVII	374675	374682	-	TTACCAA	2	flanking_reference_RNA_seq_expression_values	0	15.6901	N/A	CDS	RPB9	sense
-	chrVII	856322	856329	+	TTGCGCG	2	flanking_reference_RNA_seq_expression_values	0	13.1059	N/A	5UTR	RNR4	sense
+	chrVII	516488	516495	+	TTACCGT	2	flanking_reference_RNA_seq_expression_values	2.6028	1.47672	N/A	3UTR	SNU71	sense
+	chrXI	521974	521981	-	CTACCCA	2	flanking_reference_RNA_seq_expression_values	2.38112	1.43057	N/A	5UTR	INT_0_5403	sense
-	chrXI	383008	383015	-	CTAGCCG	2	flanking_reference_RNA_seq_expression_values	0	22.6122	N/A	CDS	MAE1	sense
+	chrXI	94359	94366	-	TTTCCCT	2	flanking_reference_RNA_seq_expression_values	5.40485	4.61474	N/A	5UTR	ASH1	sense
+	chrXI	143948	143955	-	TTGCTCG	2	flanking_reference_RNA_seq_expression_values	1.52502	1.29213	N/A	5UTR	SUT228	sense
+	chrXI	144035	144042	-	TTGCGCG	2	flanking_reference_RNA_seq_expression_values	1.40038	1.19983	N/A	5UTR	SUT228	sense
-	chrXI	93455	93462	+	TTATACG	2	flanking_reference_RNA_seq_expression_values	0	1.93819	N/A	intron	MTR2	sense
-	chrXI	17194	17201	+	TTATCAG	2	flanking_reference_RNA_seq_expression_values	0	1.01524	N/A	3UTR	SRY1	sense
+	chrXI	173750	173757	+	TTATCTG	2	flanking_reference_RNA_seq_expression_values	5.0939	3.5995	N/A	CDS	AVT3	sense
-	chrV	67153	67160	-	GTACCCA	2	flanking_reference_RNA_seq_expression_values	0.0232893	1.61516	N/A	3UTR	GLY1	sense
-	chrV	192314	192321	-	TTAGCAG	2	flanking_reference_RNA_seq_expression_values	0.0258758	2.21507	N/A	CDS	SPC25	sense
+	chrV	490704	490711	+	TTTGCCG	2	flanking_reference_RNA_seq_expression_values	1.78638	1.33827	N/A	SUTs	SUT097	sense
-	chrV	492031	492038	+	TTTTCCG	2	flanking_reference_RNA_seq_expression_values	0	7.33744	N/A	5UTR	BUR6	sense
-	chrV	258013	258020	+	TTAAGCG	2	flanking_reference_RNA_seq_expression_values	0.0310542	1.01524	N/A	3UTR	HOM3	sense
+	chrXII	932903	932910	-	TTATTCG	2	flanking_reference_RNA_seq_expression_values	4.68806	3.5995	N/A	5UTR	YLR407W	sense
-	chrXII	108555	108562	-	TGACCCT	2	flanking_reference_RNA_seq_expression_values	0	2.44581	N/A	3UTR	COX19	sense
-	chrXII	65702	65709	-	TTAAACG	2	flanking_reference_RNA_seq_expression_values	0	1.61516	N/A	3UTR	ENT4	sense
+	chrXII	828502	828509	-	TCGCCCG	2	flanking_reference_RNA_seq_expression_values	1.94466	1.43057	N/A	intergenic_region	INT_0_6102	sense
-	chrXII	1052653	1052660	-	TGACACG	2	flanking_reference_RNA_seq_expression_values	0	1.33827	N/A	XUTs	XUT_12R-389	sense
-	chrXII	65438	65445	-	TTATCAG	2	flanking_reference_RNA_seq_expression_values	0	1.47672	N/A	3UTR	ENT4	sense
-	chrXII	553640	553647	-	TCACCCA	2	flanking_reference_RNA_seq_expression_values	0.0845273	4.384	N/A	CDS	HMX1	sense
+	chrXII	86850	86857	+	TTTCCCA	2	flanking_reference_RNA_seq_expression_values	2.92022	1.24598	N/A	3UTR	TPO1	sense
-	chrXII	187405	187412	+	TTTCCTG	2	flanking_reference_RNA_seq_expression_values	0	1.10754	N/A	5UTR	IZH3	sense
-	chrXII	234925	234932	+	TTACTTG	2	flanking_reference_RNA_seq_expression_values	0.292841	1.01524	N/A	3UTR	STU2	sense
+	chrXII	424076	424083	+	TTGCCCT	2	flanking_reference_RNA_seq_expression_values	1.74972	1.33827	N/A	CDS	RRN5	sense
-	chrXII	710873	710880	+	TTTGCCG	2	flanking_reference_RNA_seq_expression_values	0.111703	3.23032	N/A	3UTR	YLR287C	sense
-	chrXII	108377	108384	+	TTTCCCT	2	flanking_reference_RNA_seq_expression_values	0	4.84548	N/A	3UTR	COX19	sense
+	chrXII	410338	410345	+	TTATGCG	2	flanking_reference_RNA_seq_expression_values	1.39952	1.19983	N/A	3UTR	PDC5	sense

## Sheet: Rap1p_passive_PATs_upstream
cluster peak strand	cluster peak chromosome	motif start	motif end	motif_strand	motif_sequence	mismatches from consensus	category	criteria for calling site	total cluster signal	distance from motif boundary to cluster peak (bp)	type of region	gene name	gene strand
+	chrIX	291730	291742	-	TCACGCATACAT	2	flanking_window_reference_pA_signal	[0, 0, 0, 0, 0, 0, 0, 0, 0, 0, 0, 0, 0, 0, 0, 0, 0, 0, 0, 0, 0, 0, 0, 0, 0, 0, 0, 0, 0, 0.232119110529, 0, 0, 0, 0, 0, 0, 0, 0, 0, 0, 0.232119110529, 0, 0, 0, 0, 0, 0, 0, 0, 0, 0, 0, 0, 0, 0, 0, 0, 0, 0, 0, 0, 0, 0, 0, 0, 0.464238221058, 0, 0, 0, 0, 0, 0, 0, 0, 0, 0, 0, 0.232119110529, 0, 0, 0, 0.232119110529]	0	35	SUTs	XUT_9F-139	sense
-	chrIX	316351	316363	+	GAACCCATACAT	2	flanking_window_reference_pA_signal	[1.16059555264, 0, 0.696357331587, 0, 0, 0, 0.232119110529, 0, 0.232119110529, 0, 0, 0, 0, 0.464238221058, 0, 0, 0, 0, 0, 0, 0, 0, 0, 0, 0, 0, 0, 0, 0, 0, 0, 0, 0, 0, 0, 0, 0, 0, 0.232119110529, 0, 0.464238221058, 0, 0, 0, 0, 0.232119110529, 0, 0, 0, 0, 0, 0, 0, 0, 0, 0, 0, 0, 0, 0.232119110529, 0, 0, 0, 0, 0, 0, 0, 0, 0, 0, 0, 0, 0, 0, 0, 0, 0, 0, 0, 0, 0, 0]	0	52	intergenic_region	INT_0_2422	sense
+	chrIX	165856	165868	+	ACACAAATAGAT	3	flanking_window_reference_pA_signal	[0, 0, 0, 0, 0, 0, 0, 0, 0, 0, 0, 0, 0, 0, 0, 0, 0, 0, 0, 0, 0, 0, 0, 0, 0, 0, 0, 0, 0, 0, 0, 0, 0, 0, 0, 0, 0, 0, 0, 0, 0, 0, 0, 0, 0, 0, 0, 0, 0, 0, 0, 0, 0, 0, 0, 0, 0, 0, 0.232119110529, 0, 0, 0, 0, 0.232119110529, 0, 0, 0, 0.232119110529, 0.464238221058, 0, 0, 0, 0, 0, 0, 0, 0, 0, 0, 0, 0, 0]	0	38	XUTs	XUT_9F-71	sense
+	chrX	159461	159473	-	AAACGGATACAT	3	flanking_window_reference_pA_signal	[0, 0, 0, 0, 0, 0, 0, 0, 0, 0, 0, 0, 0, 0, 0, 0, 0, 0, 0, 0, 0, 0, 0, 0, 0, 0, 0, 0.464238221058, 0, 0, 0, 0, 0, 0, 0, 0, 0, 0, 0, 0, 0, 0, 0, 0.464238221058, 0, 0, 0, 0.232119110529, 0.928476442115, 0, 0, 0, 0, 0, 0, 0, 0, 0, 0, 0, 0, 0, 0, 0, 0, 0, 0, 0, 0, 0, 0, 0, 0, 2.08907199476, 0, 0.464238221058, 0, 0, 0, 0, 0, 0.232119110529]	0.208525	43	3UTR	LCB3	sense
+	chrX	467194	467206	-	ACATACATATAT	3	flanking_window_reference_pA_signal	[0, 0, 0, 0, 0, 0, 0, 0, 0, 0, 0, 0, 0, 0, 0, 0, 0, 0, 0, 0, 0, 0, 0, 0, 0, 0, 0, 0, 0, 0, 0, 0, 0, 0, 0, 0, 0, 0, 0, 0, 0, 0, 0, 0, 0, 0.928476442115, 0, 0.464238221058, 0, 0, 0, 0, 0, 0, 0, 0, 0, 0, 0.232119110529, 0, 0, 0, 0, 0, 0, 0, 0, 0, 0, 0, 0, 0, 0, 0, 0, 0, 0, 0, 0, 0, 0, 0]	4.37903	15	3UTR	YJR018W	sense
-	chrX	345851	345863	+	ACACCCATACAA	1	flanking_window_reference_pA_signal	[6.26721598428, 0, 0.232119110529, 0, 4.41026310005, 0, 0, 1.6248337737, 0, 0, 0, 0, 0.232119110529, 0, 0, 0, 0, 0, 0, 0, 0, 0, 0, 0.464238221058, 3.2496675474, 0, 0, 0.464238221058, 0.232119110529, 0, 0, 0, 0, 0, 0, 0, 0, 0, 0, 0, 0, 0, 0, 0, 0, 0, 0, 0, 0, 0, 0, 0, 0, 0, 0, 0, 0, 0, 0.232119110529, 0, 0, 0, 0, 0, 0, 0, 0, 0, 0, 0, 0, 0, 0, 0, 0, 0, 0, 0, 0, 0, 0, 0]	0	52	intergenic_region	INT_0_4713	sense
+	chrX	640654	640666	+	ATACATATACAT	3	flanking_window_reference_pA_signal	[0, 0, 0, 0, 0, 0, 0, 0, 0, 0, 0, 0, 0, 0, 0, 0, 0, 0, 0, 0, 0, 0, 0, 0, 0, 0, 0, 0, 0, 0, 0, 0, 0, 0, 0, 0, 0, 0, 0, 0, 0, 0, 0, 0, 0, 0, 0, 0, 0, 0, 0, 0, 0, 0, 0.696357331587, 0, 0, 0, 0, 0.232119110529, 0, 0, 0, 0, 0, 0, 0, 0, 0, 0, 0, 0, 0, 0.232119110529, 0, 0, 0, 0, 0, 0, 0, 0]	0	24	3UTR	YJR115W	sense
-	chrII	565538	565550	-	GCATCCATAAAT	3	flanking_window_reference_pA_signal	[0, 49.6734896532, 0, 0, 35.2821048004, 0, 0, 6.26721598428, 0, 0, 21.3549581687, 0, 0, 8.12416886851, 63.6006362849, 0, 47.8165367689, 0, 0, 1.16059555264, 5.80297776322, 23.4440301634, 0, 16.7125759581, 43.6383927794, 0, 17.6410524002, 134.629084107, 0, 2.08907199476, 1.6248337737, 1.39271466317, 0.696357331587, 1.16059555264, 1.16059555264, 0.696357331587, 0.928476442115, 1.16059555264, 0.9284…	0.208525	25	intergenic_region	INT_0_610	sense
+	chrII	171116	171128	-	ATACATATACAT	3	flanking_window_reference_pA_signal	[0, 0, 0, 0, 0, 0, 0, 0, 0, 0, 0, 0, 0, 0, 0, 0, 0, 0, 0, 0, 0, 0, 0, 0, 0, 0, 0, 0, 0, 0, 0, 0, 0, 0, 0, 0, 0, 0, 0, 0, 0, 0, 0, 0, 0, 0, 0, 0, 0, 0, 0, 0, 0, 0, 0, 0, 0, 0, 0, 0, 0, 0, 0, 0, 0.232119110529, 0, 0, 0, 0, 0, 0, 0.232119110529, 0.928476442115, 2.32119110529, 5.10662043163, 0, 9.74900264221, 101.203932191, 0, 0, 2.55331021582, 40.8529634531]	0	47	3UTR	RRN10	sense
+	chrII	220970	220982	-	ATACCCAAAGAT	3	flanking_window_reference_pA_signal	[0, 0, 0, 0, 0, 0, 0, 0, 0, 0, 0, 0, 0, 0, 0, 0, 0, 0, 0, 0, 0, 0, 0, 0, 0, 0, 0, 0, 0, 0, 0, 0, 0, 0, 0, 0, 0, 0, 0, 0, 0, 0.232119110529, 0, 0, 0, 0, 0, 0, 0.232119110529, 0, 0, 0, 0, 0, 0.232119110529, 0, 0, 0, 0, 0, 0, 0, 0, 0, 0, 0, 0, 0, 0, 0, 0, 0, 0, 0, 0, 0, 0, 0, 0, 0, 0.232119110529, 2.32119110529]	0.417051	51	intergenic_region	INT_0_359	sense
+	chrII	491201	491213	-	AAACCCAAAGAT	3	flanking_window_reference_pA_signal	[1.16059555264, 0, 0.232119110529, 0, 0, 0, 0.232119110529, 0, 0.232119110529, 0, 0, 0, 0, 0, 0, 0, 0, 0.232119110529, 0, 0, 0, 0.232119110529, 0, 0.232119110529, 0, 0.232119110529, 2.08907199476, 76.367187364, 0, 61.9758025112, 0, 0.232119110529, 0.928476442115, 0, 0.232119110529, 0, 0, 0, 0.464238221058, 0.464238221058, 0, 0.232119110529, 2.55331021582, 0, 0.464238221058, 0, 0, 0, 0, 0, 0, 0, 0…	1.45968	-3	3UTR	INT_0_565	sense
+	chrII	739629	739641	-	ATACTTATACAT	3	flanking_window_reference_pA_signal	[0, 0, 0, 0, 0, 0, 0, 0, 0, 0, 0, 0, 0, 0, 0, 0, 0, 0, 0, 0, 0, 0, 0, 0, 0, 0, 0, 0, 0, 0, 0, 0, 0, 0, 0, 0, 0, 0, 0, 0, 0, 0, 0, 0, 0, 0, 0, 0, 0, 0, 0, 0, 0, 0, 0, 0, 0, 0, 0, 0, 0, 0, 0, 0, 0.232119110529, 2.32119110529, 0, 0.928476442115, 12.7665510791, 0, 4.87450132111, 7.89204975798, 0, 0, 0, 2.55331021582, 13.2307893001, 15.784099516, 0, 10.2132408633, 0, 0]	0	47	3UTR	TSC10	sense
-	chrII	119222	119234	+	GCACCCACACAT	2	flanking_window_reference_pA_signal	[0, 0, 0, 0, 0, 0, 0, 0, 0, 0.464238221058, 0, 0, 0, 0.232119110529, 0, 0, 0, 0, 0, 0, 0, 0, 0, 0, 0, 0, 0, 0, 0, 0, 0.696357331587, 0, 0, 0, 0, 0.232119110529, 0, 0, 0, 0, 0, 0.464238221058, 0, 0, 0, 0, 0, 0, 0, 0, 0, 0, 0, 0, 0, 0, 0, 0, 0, 0, 0, 0, 0, 0, 0, 0, 0, 0, 0, 0, 0, 0, 0, 0, 0, 0, 0, 0, 0, 0, 0, 0]	1.04263	22	3UTR	INT_0_290	sense
+	chrII	344383	344395	+	AAACACATACAT	2	flanking_window_reference_pA_signal	[0, 0, 0, 0, 0, 0, 0, 0, 0, 0, 0, 0, 0, 0, 0, 0, 0, 0, 0, 0, 0, 0, 0, 0, 0, 0, 0, 0, 0, 0.928476442115, 0, 0, 0, 0, 0, 0.464238221058, 0, 0.696357331587, 0, 0, 0, 0, 0, 0, 0, 0, 0, 0, 0.232119110529, 0, 0, 0, 0.696357331587, 0, 0, 0, 0, 0, 0, 0, 0, 0, 0, 0, 0, 0, 0, 0, 0, 0, 0, 0, 0, 0, 0, 0, 0, 0, 0, 0, 0, 0]	0	-1	3UTR	YRO2	sense
+	chrII	290530	290542	+	ACACACATACAT	1	flanking_window_reference_pA_signal	[0, 0, 0, 0, 0, 0, 0, 0, 0, 0, 0, 0, 0, 0.232119110529, 0, 0, 0, 0, 0, 0, 0, 0, 0, 0, 0, 0, 0, 0, 0, 0, 0, 0, 0, 0, 0, 0, 0, 0, 0, 0.232119110529, 0, 0.696357331587, 0, 0, 0, 0, 0, 0, 0, 0, 0, 0, 0, 0, 0.232119110529, 0, 0, 0, 0.928476442115, 0, 0.232119110529, 0, 0.696357331587, 0, 7.42781153692, 9.28476442115, 0, 1.6248337737, 0, 0, 0, 0.464238221058, 0, 0, 0, 0.232119110529, 0, 0, 0.2321191105…	1.25115	35	3UTR	SCO2	sense
+	chrII	193569	193581	+	ACACATATACAT	2	flanking_window_reference_pA_signal	[0, 0, 0, 0.696357331587, 0, 0, 0.928476442115, 0, 0, 0, 0, 0, 0, 0.232119110529, 0, 0.232119110529, 0, 0.232119110529, 0, 0, 0, 0, 0, 0, 0, 0.232119110529, 0, 0, 0, 0, 0, 0, 0, 0, 0, 0, 0, 0, 0, 0, 0, 0, 0, 0, 0, 0.232119110529, 0, 0, 0, 0, 0, 0.464238221058, 0.464238221058, 0, 0.232119110529, 0, 0, 0, 0, 0, 0, 0, 0, 0.232119110529, 0, 0, 0, 0, 0, 0, 0, 0, 0, 0, 0, 0, 0, 0, 0, 0, 0, 0]	0.834102	-24	3UTR	FUS3	sense
+	chrII	301290	301302	+	ATATACATACAT	3	flanking_window_reference_pA_signal	[0, 0, 0, 0, 0, 0, 0, 0, 0, 0, 0, 0, 0, 0, 0, 0, 0, 0, 0, 0, 0, 0, 0, 0, 0, 0, 0, 0, 0, 0.232119110529, 0, 0, 0, 0, 0, 0, 0, 0, 0, 0, 0, 0, 0, 0, 0, 0, 0, 0, 0, 0, 0, 0, 0, 0, 0.232119110529, 0, 0, 0.696357331587, 5.33873954216, 0, 0, 0, 0.232119110529, 0.464238221058, 1.6248337737, 70.0999713797, 364.659122641, 0, 0, 3.94602487899, 9.28476442115, 0, 0.232119110529, 0.696357331587, 0.232119110529…	1.25115	36	3UTR	RPL4A	sense
-	chrVI	107812	107824	-	ACACACATACAT	1	flanking_window_reference_pA_signal	[0, 0, 0, 0, 0, 0, 0, 0, 0, 0.232119110529, 0, 0, 0, 0, 0, 0, 0, 0.232119110529, 0, 0.232119110529, 2.32119110529, 0, 0.232119110529, 0, 0, 0, 0, 0, 0, 0, 0, 0, 0, 0, 0, 0, 0, 0, 0, 0, 0, 0, 0, 0, 0, 0, 0, 0, 0, 0, 0, 0, 0, 0, 0, 0, 0, 0, 0, 0, 0, 0, 0, 0, 0, 0, 0, 0, 0, 0, 0, 0, 0, 0, 0, 0, 0, 0, 0, 0, 0, 0]	0.208525	32	3UTR	IES1	sense
+	chrVI	84007	84019	+	ACTCCTTTACAT	3	flanking_window_reference_pA_signal	[0, 0, 0, 0, 0, 0, 0, 0, 0, 0, 0, 0, 0.696357331587, 0, 0, 0, 0, 0, 0, 0, 0.464238221058, 0, 0, 0, 0, 0, 0, 0, 0, 0, 0, 0, 0, 0, 0, 0, 0, 0, 0, 0, 0, 0, 0, 0, 0, 0, 0, 0, 0, 0, 0, 0, 0, 0, 0, 0, 0, 0, 0, 0, 0, 0, 0, 0, 0, 0, 0, 0.232119110529, 0, 0, 0, 0, 0, 0, 0, 0, 0, 0, 0, 0, 0, 0]	1.87673	-18	3UTR	STE2	sense
-	chrXV	143948	143960	-	ACGGCCCTACAT	3	flanking_window_reference_pA_signal	[0.232119110529, 1.6248337737, 0, 0, 0.464238221058, 0, 0, 0, 0, 0.232119110529, 1.6248337737, 0, 0, 0, 0, 0, 0.464238221058, 0, 0, 0, 0, 0, 0, 0, 0, 0, 0, 0, 0, 0, 0, 0, 0, 0, 0, 0, 0, 0, 0, 0, 0, 0, 0, 0, 0, 0, 0, 0, 0, 0, 0, 0, 0, 0, 0, 0, 0, 0, 0, 0, 0, 0, 0, 0, 0, 0, 0.464238221058, 0, 0, 0, 0, 0.232119110529, 0, 0.232119110529, 0, 0, 0, 0.232119110529, 0.232119110529, 0.928476442115, 0.2321…	0	51	intergenic_region	INT_0_7673	sense
+	chrXV	391149	391161	-	CCACCCACCCAT	3	flanking_window_reference_pA_signal	[0, 0, 0, 0, 0, 0, 0, 0, 0, 0, 0, 0, 0, 0, 0, 0, 0, 0, 0, 0, 0, 0, 0, 0, 0, 0, 0, 0, 0, 0, 0, 0, 0, 0, 0, 0, 0, 0, 0, 0, 0, 0, 0, 0, 0, 0, 0, 0, 0, 0, 0, 0, 0, 0.232119110529, 0, 0, 0.928476442115, 0, 0, 0, 0, 0, 0, 0, 0, 0, 0, 0, 0, 0, 0, 0, 0, 0, 0, 0, 0, 0, 0, 0, 0, 0]	0.208525	26	5UTR	INT_0_7868	sense
+	chrXV	113259	113271	+	AAACCCATATAT	2	flanking_window_reference_pA_signal	[0, 0, 0, 0, 0, 0, 0, 0, 0, 0, 0, 0, 0, 0, 0, 0, 0, 0, 0, 0, 0, 0.464238221058, 0, 0, 0, 0, 0, 0, 0, 0.464238221058, 0, 0, 0, 0, 0, 0, 0, 0, 0, 0, 0, 0, 0, 0, 0, 0, 0, 0, 0, 0, 0, 0, 0, 0, 0, 0, 0, 0, 0, 0, 0, 0.232119110529, 0, 0, 0, 0, 0, 0.232119110529, 0, 0, 0, 0, 0, 0, 0, 0, 0, 0, 0, 0, 0, 0]	0.625576	-9	3UTR	YOL107W	sense
+	chrXV	624427	624439	+	ATAAACATACAT	3	flanking_window_reference_pA_signal	[0, 0, 0, 0, 0, 0, 0, 0, 0, 0, 0, 0, 0, 0, 0, 0, 0, 0, 0, 0, 0, 0, 0, 0, 0, 0, 0, 0, 0, 0, 0, 0, 0, 0, 0, 0, 0, 0, 0, 0, 0, 0, 0, 0, 0, 0, 0, 0, 0, 0, 0, 0, 0, 0, 0, 0, 0, 0, 0, 0, 0, 0, 0, 0, 0, 0, 0, 0, 0.464238221058, 0, 0, 0, 0, 0, 0, 0.696357331587, 8.8205262001, 0, 0.232119110529, 0, 0, 0.232119110529]	0.417051	46	3UTR	PDR5	sense
+	chrXV	494519	494531	+	ACACGCACACAC	3	flanking_window_reference_pA_signal	[0, 0, 0, 0, 0, 0, 0, 0, 0, 0, 0, 0, 0, 0, 0, 0, 0, 0, 0, 0, 0, 0, 0, 0, 0, 0, 0, 0, 0, 0, 0, 0, 0, 0, 0, 0, 0, 0, 0, 0.232119110529, 0, 1.16059555264, 0, 3.94602487899, 38.2996532373, 0, 0, 5.80297776322, 0, 4.17814398952, 0, 0, 0, 0, 0.232119110529, 0, 0, 0, 0.464238221058, 0.696357331587, 0, 0, 0, 0.232119110529, 4.41026310005, 0, 0, 0.928476442115, 2.78542932635, 0, 0, 0, 0.696357331587, 0.46…	0.417051	14	3UTR	TMA46	sense
+	chrXV	170014	170026	+	ATACACATAAAT	3	flanking_window_reference_pA_signal	[0, 0, 0, 0, 0, 0, 0, 0, 0, 0, 0, 0, 0, 0, 0, 0, 0, 0, 0, 0, 0, 0, 0, 0, 0, 0, 0, 0, 0, 0, 0, 0, 0, 0, 0, 0, 0, 0, 0, 0, 0, 0, 0, 0, 0, 0, 0, 0, 0, 0, 0, 0, 0, 0, 0, 0, 0, 0, 0, 0, 0, 0, 0, 0, 0, 0, 0, 0, 0, 0, 0.232119110529, 0, 0, 0, 0, 0.696357331587, 0, 0, 0, 0, 0.232119110529, 0]	0	45	3UTR	ATG19	sense
+	chrXV	683678	683690	+	ATACATATACAT	3	flanking_window_reference_pA_signal	[0, 0, 0, 0.232119110529, 0, 0.232119110529, 0, 0, 0, 0, 0, 0, 0, 0, 0, 0, 0, 0, 0, 0, 0, 0, 0, 0, 0, 0, 0, 0, 0, 0, 0, 0, 0, 0, 0, 0, 0, 0, 0, 0, 0, 0.232119110529, 0, 0, 0, 0, 0, 0, 0, 0, 0, 0, 0, 0, 0, 0, 0, 0, 0, 0, 0, 0, 0, 0, 0, 0.464238221058, 0.232119110529, 0, 0, 1.39271466317, 0, 0, 0, 0, 0, 0, 0, 0, 0, 0, 0, 0]	2.29378	39	3UTR	YOR186W	sense
-	chrXIV	663770	663782	-	CTACACATACAT	3	flanking_window_reference_pA_signal	[0, 0, 0, 16.7125759581, 0, 0.928476442115, 36.9069385741, 0.232119110529, 0, 0, 0, 0, 0, 0, 0, 0, 0, 0, 0, 0, 0, 0, 0, 0, 0, 0, 0.232119110529, 0, 0, 0, 0, 0, 0, 0, 0, 0, 0, 0, 0, 0, 0, 0, 0, 0, 0, 0, 0, 0, 0, 0, 0, 0, 0, 0, 0, 0, 0, 0, 0, 0, 0, 0, 0, 0, 0, 0, 0, 0, 0, 0, 0, 0, 0, 0, 0, 0, 0, 0, 0, 0, 0.232119110529, 4.87450132111]	0.625576	46	intergenic_region	INT_0_7466	sense
-	chrXIV	486667	486679	-	TCACAGATACAT	3	flanking_window_reference_pA_signal	[0, 0, 0, 1.85695288423, 0, 0, 0, 0, 0, 0, 0, 0, 0, 0, 0, 0, 0, 0, 0, 0, 0, 0, 0, 0, 0, 0, 0, 0, 0, 0, 0, 0, 0, 0, 0, 0, 0, 0, 0.232119110529, 0, 0, 0, 0, 0, 0, 0, 0, 0, 0, 0, 0, 0, 0, 0, 0, 0, 0, 0, 0, 0, 0, 0, 0, 0, 0, 0, 0, 0, 0, 0, 0, 0, 0, 0, 0, 0, 0, 0, 0, 0, 0, 0]	4.58756	49	3UTR	MLF3	sense
+	chrXIV	96102	96114	+	ACCCCCATATCT	3	flanking_window_reference_pA_signal	[0, 0, 0, 0, 0, 0, 0, 0, 0, 0, 0, 0, 0, 0, 0, 0, 0, 0, 0, 0, 0, 0, 0, 0, 0, 0, 0, 0, 0, 0, 0, 0, 0, 0, 0, 3.71390576846, 0, 2.78542932635, 0, 0.232119110529, 0, 0, 0, 0, 0, 0.232119110529, 1.16059555264, 0, 0.232119110529, 0, 0.696357331587, 0, 0, 0, 1.16059555264, 0, 0, 0, 0, 0, 0, 0, 0, 0, 0, 0, 0, 0, 0, 0.464238221058, 0, 0, 0, 0.928476442115, 4.17814398952, 0, 0, 8.58840708957, 0, 0, 0, 1.624…	0.208525	47	3UTR	CUS2	sense
+	chrXIV	352134	352146	+	ACGCCCATAATT	3	flanking_window_reference_pA_signal	[0, 0, 0, 0, 0.232119110529, 0, 0, 0, 0, 0, 1.16059555264, 0, 0, 0, 1.16059555264, 0, 0, 0, 0.232119110529, 0, 0, 0, 0, 0, 0, 0, 0, 0, 0, 0, 0, 0, 0, 0, 0, 0, 0, 0, 0, 0, 0, 0, 0, 0, 0, 0, 0, 0, 0, 0, 0, 0, 0, 0, 0, 0, 0, 0, 0, 0, 0, 0, 0, 0, 0, 0, 0, 0, 0, 0, 0.232119110529, 0, 0, 0, 0, 0, 0, 0, 0, 0, 0, 0]	1.45968	-20	3UTR	YNL146W	sense
-	chrXIV	703272	703284	+	ACCTCCCTACAT	3	flanking_window_reference_pA_signal	[0, 0, 0, 0, 0, 0, 0, 0.232119110529, 2.78542932635, 11.1417173054, 0, 0, 0, 0.696357331587, 4.17814398952, 23.6761492739, 0, 0.232119110529, 0, 1.16059555264, 0.232119110529, 0, 0, 0, 0, 0, 0, 0, 0, 0, 0, 0, 0, 0, 0, 0, 0, 0, 0, 0, 0, 0, 0, 0, 0, 0, 0, 0, 0, 0, 0, 0, 0, 0, 0, 0, 0, 0.232119110529, 0, 0, 0, 0, 0, 0, 0, 0, 0, 0, 0, 0, 0, 0, 0, 0, 0, 0, 0, 0, 0, 0, 0, 0]	0	37	intergenic_region	INT_0_7495	sense
+	chrXIV	556841	556853	+	ATATGCATACAT	3	flanking_window_reference_pA_signal	[0, 0, 0, 0, 0, 0, 0, 0, 0, 0, 0, 0, 0, 0, 0, 0, 0, 0, 0, 0, 0, 0, 0, 0, 0, 0, 0, 0, 0, 0, 0, 0, 0, 0, 0, 0, 0, 0, 0, 0, 0, 0, 0, 0, 0, 0, 0, 0, 0, 0, 0, 0, 0, 0, 0, 0, 0, 0, 0, 0, 0, 0, 0, 0, 0, 0, 0, 0, 0, 0.232119110529, 1.16059555264, 0, 6.96357331587, 79.3847358009, 0, 3.2496675474, 0, 0.696357331587, 4.87450132111, 0, 0.232119110529, 0]	0.208525	43	CDS	BDP1	sense
+	chrXIII	407630	407642	-	CCGCGCATACAT	3	flanking_window_reference_pA_signal	[0, 0, 0, 0, 0, 0, 0, 0, 0, 0, 0, 0, 0, 0, 0, 0, 0, 0, 0, 0, 0, 0, 0, 0, 0, 0, 0, 0, 0, 0, 0, 0, 0, 0, 0, 0, 0, 0, 0, 0, 0, 0, 0, 0, 0, 0, 0, 0, 0, 0, 0, 0, 0, 0, 0, 0, 0, 0, 0, 0, 0, 0, 0, 0, 0, 0, 0, 0, 0, 0, 0, 0.232119110529, 6.96357331587, 0, 0.232119110529, 0, 0.232119110529, 5.57085865269, 0, 0, 0.232119110529, 0]	0.208525	42	3UTR	AVO2	sense
+	chrXIII	746013	746025	-	TGACCTATACAT	3	flanking_window_reference_pA_signal	[0, 0, 0, 0, 0, 0, 0, 0, 0, 0, 0, 0, 0, 0, 0, 0, 0, 0, 0, 0, 0, 0, 0, 0, 0, 0, 0, 0, 0, 0.232119110529, 0, 0, 0, 0, 0, 0, 0, 0, 0, 0, 0, 0, 0, 0, 0, 0, 0, 0, 0, 0, 0, 0, 0.232119110529, 0, 0, 0, 0, 0, 0, 0, 0, 0, 0, 0, 0, 0, 0.464238221058, 0, 0, 0, 0, 0.464238221058, 0, 0, 0, 0, 0, 0.232119110529, 0, 0, 0, 3.01754843688]	0	51	3UTR	BCH1	sense
+	chrXIII	14018	14030	-	ACACCCGTAAAA	3	flanking_window_reference_pA_signal	[0, 0, 0, 0, 0, 0, 0, 0, 0, 0, 0, 0, 0, 0, 0, 0, 0, 0, 0, 0, 0, 0, 0, 0, 0, 0.464238221058, 0, 0, 0, 0, 0, 0, 0, 0.696357331587, 0, 0, 0, 0, 0, 0, 0, 0.464238221058, 0, 0.232119110529, 0, 0, 0, 0, 0, 0, 0.232119110529, 0, 0, 0, 0, 0, 0, 0, 0, 0, 0, 0, 0, 0, 0, 0, 0, 0, 1.16059555264, 0, 0.232119110529, 0, 0, 0.232119110529, 0, 0, 0, 0, 0, 0, 0, 0]	6.25576	38	SUTs	XUT_13F-3	sense
-	chrXIII	226848	226860	+	CCATACATACAT	3	flanking_window_reference_pA_signal	[0, 1.16059555264, 9.28476442115, 0, 5.80297776322, 95.1688353168, 0, 0, 11.6059555264, 5.10662043163, 0, 0, 2.55331021582, 0, 0.928476442115, 0.464238221058, 1.39271466317, 0, 0, 0, 0.232119110529, 0, 0, 0, 0.696357331587, 2.78542932635, 0, 0, 2.08907199476, 5.80297776322, 0, 0.928476442115, 0.232119110529, 0, 3.48178665793, 0, 0, 0.232119110529, 0.232119110529, 0, 0.232119110529, 2.55331021582,…	0.417051	47	3UTR	RPS17A	antisense
-	chrXIII	650980	650992	+	ACACCCGTACAT	1	flanking_window_reference_pA_signal	[0.232119110529, 0, 0.464238221058, 0, 0.232119110529, 3.94602487899, 0, 2.08907199476, 0, 0.464238221058, 6.03509687375, 0, 0, 0, 0, 0, 0, 0, 0, 0, 0, 0, 0, 0, 0, 0, 0, 0, 0.232119110529, 0.696357331587, 0, 0, 0, 0, 0, 0, 0, 0, 0.232119110529, 0.232119110529, 0, 0, 0, 0, 0, 0, 0, 0, 0, 0, 0, 0, 0, 0, 0, 0, 0, 0, 0, 0, 0, 0, 0, 0, 0, 0, 0, 0, 0, 0, 0, 0, 0, 0, 0, 0, 0, 0, 0, 0, 0, 0]	2.08525	42	intergenic_region	INT_0_6765	sense
+	chrXIII	538654	538666	+	ACACACATATAT	2	flanking_window_reference_pA_signal	[0, 0, 0, 0, 0, 0, 0, 0, 0, 0, 0, 0, 0, 0, 0, 0, 0, 0, 0, 0, 0, 0, 0, 0, 0, 0, 0, 0, 0, 0, 0, 0, 0, 0, 0, 0, 0, 0, 0, 0, 0, 0, 0, 0, 0, 0, 0, 0, 0, 0, 0, 0, 0, 0, 0, 0, 0, 0, 0, 0, 0, 0, 0, 0, 0, 0, 0, 0, 0, 0, 0, 0, 0, 0, 0, 0, 0, 0, 0.464238221058, 0, 0.464238221058, 7.19569242639]	0.208525	51	3UTR	YMR134W	sense
+	chrXIII	355081	355093	+	ACTCACATACAC	3	flanking_window_reference_pA_signal	[0, 0, 0.696357331587, 0, 5.57085865269, 0, 0, 0, 0, 2.08907199476, 0, 0.696357331587, 0, 0, 0, 0.928476442115, 0, 0, 0, 0, 0, 0.232119110529, 0.232119110529, 0, 0.232119110529, 0, 0, 0, 0, 0, 0, 0, 0, 0.696357331587, 0, 0.464238221058, 0, 0.232119110529, 0, 0.232119110529, 0, 0, 0, 0, 0, 0, 0, 0, 0, 0, 0, 0, 0, 0, 0, 0, 0, 0, 0, 0, 0, 0, 0, 0, 0, 0.696357331587, 4.87450132111, 0, 0, 0.2321191105…	12.9286	51	3UTR	MCM1	sense
-	chrXIII	553072	553084	+	AGACCCATACAT	1	flanking_window_reference_pA_signal	[0, 0.928476442115, 0, 0, 0, 0, 0.464238221058, 0.232119110529, 0.232119110529, 0, 0, 0.696357331587, 0, 0.232119110529, 0, 0, 0, 0, 0.696357331587, 2.32119110529, 0, 0, 0.232119110529, 0.464238221058, 0.696357331587, 1.6248337737, 0, 0, 0, 0.232119110529, 0, 0, 0, 0, 0, 0, 4.17814398952, 0, 0.928476442115, 2.08907199476, 0, 2.32119110529, 0, 0, 0, 0, 0, 0.232119110529, 0, 0, 0, 0, 0, 0, 0, 0, 0,…	0	16	intergenic_region	INT_0_6685	sense
-	chrXIII	651994	652006	+	CCACCAATACTT	3	flanking_window_reference_pA_signal	[0, 0, 0, 0, 0, 0, 0, 0, 5.33873954216, 0, 0, 0, 0.232119110529, 0, 0, 0, 0.696357331587, 0, 0, 0, 0, 0, 0, 3.48178665793, 0, 0, 0.464238221058, 0, 8.35628797904, 5.33873954216, 0, 0, 0, 0, 0, 0, 0, 0, 0, 0, 0, 0.696357331587, 0, 0, 3.94602487899, 0, 0, 7.19569242639, 0, 0.696357331587, 0, 0.928476442115, 4.64238221058, 101.436051301, 0, 28.086412374, 0, 7.42781153692, 0, 1.6248337737, 4.87450132…	0	-1	intergenic_region	INT_0_6767	sense
-	chrIV	123727	123739	-	ACAAACATACAA	3	flanking_window_reference_pA_signal	[0, 0.464238221058, 0.232119110529, 0, 0, 0, 0, 0.696357331587, 0, 0, 0, 0, 0, 0, 0.232119110529, 0, 0, 0, 0, 0, 0, 0, 0, 0, 0, 0, 0, 0, 0, 0, 0, 0, 0, 0, 0, 0, 0, 0, 0, 0, 0, 0, 0.232119110529, 0.232119110529, 0, 0, 0, 0, 0, 0.232119110529, 1.39271466317, 2.78542932635, 0, 0.232119110529, 0, 0, 0, 0, 0, 0, 0, 0, 0, 0, 0, 0, 0, 0, 0, 0.464238221058, 0, 0, 0, 0, 0, 0, 0, 0, 0, 0, 0, 0]	0.834102	1	3UTR	INT_0_1138	sense
+	chrIV	917220	917232	-	ACTCACATACAA	3	flanking_window_reference_pA_signal	[0, 0, 0, 0, 0, 0, 0, 0, 0, 0, 0, 0, 0, 0.696357331587, 0, 0, 0, 0, 0, 0, 2.08907199476, 0, 0, 4.41026310005, 0, 0, 0, 0, 0, 0, 0.232119110529, 1.6248337737, 5.33873954216, 2.78542932635, 0, 0, 0.464238221058, 2.32119110529, 1.85695288423, 0, 5.33873954216, 22.5155537213, 0, 9.28476442115, 0, 7.65993064745, 0, 1.85695288423, 0, 0, 0.232119110529, 0.232119110529, 0.232119110529, 0.232119110529, 0,…	4.58756	50	3UTR	ADK1	sense
+	chrIV	521666	521678	-	AAACACATGCAT	3	flanking_window_reference_pA_signal	[0, 0, 0, 0, 0, 0, 0, 0, 0, 0, 0, 0, 0, 0, 0, 0, 0, 0, 0, 0, 0, 0, 0, 0, 0, 0, 0, 0, 0, 0, 0, 0, 0, 0, 0, 0, 0, 0, 0, 0, 0, 0.232119110529, 0, 0.696357331587, 0, 0, 0, 0, 0, 0, 0, 0, 0, 0, 0, 0, 0, 0, 0, 1.16059555264, 0, 1.39271466317, 0.464238221058, 0.464238221058, 0, 0.232119110529, 0, 0, 0.232119110529, 0, 0, 0, 0, 0, 0, 0, 0, 0, 0, 0, 0, 0]	0.208525	31	3UTR	YDR034W-B	sense
+	chrIV	217165	217177	-	ACAACTATACAG	3	flanking_window_reference_pA_signal	[0, 0, 0, 0, 0, 0, 1.39271466317, 0, 0.464238221058, 1.39271466317, 0, 0, 0, 0, 0, 0, 1.85695288423, 0, 0, 0.232119110529, 0, 0.696357331587, 0, 1.6248337737, 0, 0, 0, 0, 0, 0, 0, 0, 0, 0, 0, 0, 0, 0, 0, 0, 0, 0.928476442115, 0, 0.696357331587, 0, 0, 0.232119110529, 0, 0, 0, 0, 0, 0, 0, 0, 0, 0, 0, 0, 0, 0, 0.232119110529, 0, 0.464238221058, 3.48178665793, 0, 4.41026310005, 0, 129.986701896, 0, 0…	3.33641	38	3UTR	ARF2	sense
-	chrIV	813037	813049	-	ATATACATACAT	3	flanking_window_reference_pA_signal	[0, 0, 0.232119110529, 0.232119110529, 1.85695288423, 0, 0, 0, 0, 0, 0.232119110529, 0, 0.232119110529, 0, 0, 0, 0, 0, 0.232119110529, 0, 0, 0, 0.464238221058, 3.94602487899, 87.5089046694, 0, 0.232119110529, 0, 0, 0, 0.696357331587, 0, 0, 0, 0, 0, 0, 0.232119110529, 0, 0, 0, 0, 0, 0, 0, 0, 0, 0, 0, 0, 0, 0, 0, 0, 0, 0, 0, 0, 0, 0, 0, 0, 0, 0, 0.232119110529, 0, 0.232119110529, 0, 0, 0.9284764421…	5.00461	28	3UTR	RSM24	sense
+	chrIV	771525	771537	-	ACACATATACTT	3	flanking_window_reference_pA_signal	[0, 0, 0, 0, 0, 0, 0, 0, 0, 0, 0, 0, 0, 0, 0, 0, 0, 0, 0, 0, 0, 0, 0, 0, 0, 0, 0, 0, 0, 0.232119110529, 0, 0, 0, 0, 0, 0, 0, 0, 0, 0, 0, 0, 0, 0, 0, 0, 0, 0, 0, 0, 0, 0, 0, 0, 0, 0, 0, 0, 0.464238221058, 0, 0, 0, 0.232119110529, 6.26721598428, 10.4453599738, 0, 0, 0, 0, 15.5519804054, 84.723475343, 0, 32.496675474, 0, 0.928476442115, 6.03509687375, 1.85695288423, 6.26721598428, 82.1701651272, 0, …	0.208525	51	3UTR	HOM2	sense
+	chrIV	1490882	1490894	-	AGAGCCACACAT	3	flanking_window_reference_pA_signal	[0, 0, 0, 0, 0, 0, 0, 0, 0, 0, 0, 0, 0, 0, 0, 0, 0, 0, 0, 0, 0, 0, 0, 0, 0, 0, 0, 0, 0, 0, 0, 0, 0, 0, 0, 0, 0, 0, 0, 0, 0, 0, 0, 0, 0, 0, 0, 0, 0, 0, 0, 0, 0, 0, 0, 0, 0, 0, 0, 0, 0.232119110529, 1.6248337737, 0, 0, 0, 0, 0.232119110529, 0, 0, 0, 0, 0, 0, 0, 0, 0, 0, 0, 0, 0.232119110529, 0, 0]	0	31	3UTR	SNA2	sense
+	chrIV	1261449	1261461	-	AGAGCCAAACAT	3	flanking_window_reference_pA_signal	[0, 0, 0, 0, 0, 0, 0, 0.232119110529, 0.696357331587, 0, 0, 0.928476442115, 0, 5.33873954216, 0, 0, 0, 2.78542932635, 0, 0, 0, 0, 0, 0, 0, 0, 0, 0.232119110529, 3.01754843688, 0, 0, 0.464238221058, 1.85695288423, 0, 0, 0.464238221058, 1.85695288423, 0, 0, 0.232119110529, 0.696357331587, 0, 0, 0, 0.232119110529, 0, 0, 0, 0, 0, 0, 0, 0, 0, 0, 0, 0, 0, 0, 0, 0, 0, 0, 0, 0, 0, 0, 0, 0, 0, 0, 0, 0, 0,…	3.96198	-17	3UTR	SHE9	sense
-	chrIV	1301125	1301137	-	CAACCCAAACAT	3	flanking_window_reference_pA_signal	[0, 0, 0.464238221058, 0, 0, 0, 0.464238221058, 0, 0, 0.464238221058, 0, 0, 0, 0, 0, 0, 0, 0, 0, 0, 0.464238221058, 0, 0, 0, 0, 0, 0, 0, 0, 0, 0, 0, 0, 0, 0, 0, 0, 0, 0, 0, 0, 0, 0, 0, 0, 0, 0, 0, 0, 0, 0, 0, 0, 0, 0, 0, 0, 0, 0, 0, 0, 0, 0, 0, 0, 0, 0, 0, 0, 0, 0, 0, 0, 0, 0, 0, 0, 0, 0, 0, 0, 0]	1.6682	50	intergenic_region	INT_0_1999	sense
+	chrIV	117369	117381	+	AGACCCATACAT	1	flanking_window_reference_pA_signal	[0, 0, 0, 0, 0, 0, 0, 0, 0, 0, 0, 0, 0, 0, 0, 0, 0, 0, 0, 0, 0, 0, 0, 0, 0, 0, 0, 0, 0, 0, 0, 0, 0, 0, 0, 0, 0, 0, 0, 0, 0, 0, 0, 0, 0, 0, 0, 0, 0, 0, 0, 0, 0, 0, 0, 0, 0, 0, 0, 0, 0, 0, 0, 0, 0, 0, 0, 0.464238221058, 0, 0, 0, 0, 0.232119110529, 0, 0, 0.928476442115, 0, 0, 0.232119110529, 0, 0.232119110529, 0]	0.417051	45	intergenic_region	INT_0_1136	sense
-	chrIV	217313	217325	+	GAACCCGTACAT	3	flanking_window_reference_pA_signal	[2.78542932635, 0, 0, 0.232119110529, 0, 0, 0.696357331587, 0, 0.232119110529, 3.71390576846, 0, 0.696357331587, 0, 0, 0.464238221058, 0, 0, 0, 0, 0, 0, 0, 0, 0, 0, 0, 0, 0, 0, 0, 0.232119110529, 0, 0, 0, 0, 0.928476442115, 0, 0, 0, 2.08907199476, 7.65993064745, 0, 0, 0, 0, 0, 0.232119110529, 1.85695288423, 0, 0.464238221058, 0, 0, 0, 0, 0.464238221058, 0, 0, 0, 0, 0, 0, 0.464238221058, 0, 0, 0, …	0	12	intergenic_region	INT_0_1205	sense
+	chrIV	255034	255046	+	CAACACATACAT	3	flanking_window_reference_pA_signal	[0, 0, 0, 0, 0, 0, 0, 0, 0, 0, 0, 0, 0, 0, 0, 0, 0, 0, 0, 0, 0, 0, 0, 0, 0, 0, 0, 0, 0, 0, 0, 0, 0, 0, 0, 0, 0, 0, 0, 0, 0, 0, 0, 0, 0, 0, 0, 0, 0, 0, 0, 0, 0, 0, 0.232119110529, 0, 0, 0, 0.232119110529, 0, 0, 0, 0, 0, 0, 0, 0, 0, 0, 0, 0, 0, 1.16059555264, 0, 0, 0, 0, 0, 0, 0, 0, 0]	0	42	CDS	YDL114W-A	sense
+	chrIV	694248	694260	+	ACCTACATACAT	3	flanking_window_reference_pA_signal	[0, 0, 0, 0, 0, 0, 0, 0, 0, 0, 0, 0, 0, 0, 0, 0, 0, 0, 0, 0, 0, 0, 0, 0, 0, 0, 0, 0, 0, 0, 0, 0, 0, 0, 0, 0, 0, 0, 0, 0, 0, 0, 0, 0, 0, 0, 0, 0, 0, 0, 0, 0, 0, 0, 0, 0.696357331587, 0, 0.232119110529, 1.39271466317, 0.232119110529, 0.696357331587, 4.64238221058, 1.16059555264, 6.03509687375, 47.5844176584, 0, 0.232119110529, 0, 0.696357331587, 1.6248337737, 3.01754843688, 0, 0, 0, 0, 0, 0, 0, 0, …	0	34	3UTR	DPB4	sense
-	chrIV	579225	579237	+	AGACCCAAACAT	2	flanking_window_reference_pA_signal	[2.08907199476, 7.42781153692, 0, 0, 0.928476442115, 0, 0, 0.464238221058, 0, 0.696357331587, 0, 0, 0, 0, 0, 0.232119110529, 0.232119110529, 0.232119110529, 0.232119110529, 0, 0.232119110529, 0, 0, 0, 0, 4.17814398952, 0, 11.838074637, 0, 0, 0, 0, 0.232119110529, 0, 0.464238221058, 0, 0, 0, 0, 0, 0, 0.232119110529, 0, 0, 0, 0.928476442115, 0, 0, 0, 0, 0, 0, 0, 0, 0, 0, 0, 0, 0, 0, 0, 0, 0, 0, 0, …	0	25	intergenic_region	INT_0_1496	sense
+	chrIV	1322034	1322046	+	ACACACATTCAT	2	flanking_window_reference_pA_signal	[0, 0, 0, 0, 0, 0, 0, 0, 0, 0, 0, 0, 0, 0, 0.232119110529, 0, 0, 0.232119110529, 0, 0, 0, 0, 0, 0, 0, 0, 0.464238221058, 0, 0, 0, 0, 0, 0, 0.928476442115, 0, 1.6248337737, 0, 0, 0, 2.08907199476, 0, 0, 0, 0.232119110529, 0, 0, 0.696357331587, 0.928476442115, 1.85695288423, 0, 0, 0.464238221058, 0, 0, 0, 0, 0, 0, 0, 0, 0, 0, 0, 0, 0, 0, 0, 0, 0, 0, 0, 0, 0, 0, 0, 0, 0, 0, 0, 0, 0, 0]	0	9	3UTR	SNX41	sense
-	chrIV	1229214	1229226	+	ACACACACACAT	2	flanking_window_reference_pA_signal	[0, 0, 0, 0, 0, 0, 0.232119110529, 0, 0, 1.16059555264, 0, 0, 0, 0, 4.17814398952, 0, 0, 0, 0, 0, 0, 0.232119110529, 0, 0, 0.232119110529, 0.928476442115, 0, 0, 0.232119110529, 0.928476442115, 4.41026310005, 0, 0.232119110529, 0.232119110529, 2.78542932635, 0.464238221058, 0, 0, 0, 0.232119110529, 0, 0.232119110529, 0, 0, 0, 0.232119110529, 0, 0, 0, 0, 0, 0, 0, 0, 0, 0, 0, 0, 0, 0, 0, 0, 0, 0, 0,…	0.417051	22	3UTR	LSM6	sense
-	chrIV	630700	630712	+	AAAACCATAGAT	3	flanking_window_reference_pA_signal	[0, 0, 0.232119110529, 0, 0, 0, 0, 0, 0, 0, 0, 0.232119110529, 0, 0, 0, 0, 0, 0, 0, 0, 0, 0, 0, 0, 0, 0, 0.232119110529, 1.85695288423, 0, 0, 8.8205262001, 0, 33.8893901372, 0, 0, 0, 0.232119110529, 10.2132408633, 7.89204975798, 0, 0, 0, 0, 0, 0, 0.232119110529, 0, 0, 0, 0, 0, 0, 0, 0, 0.232119110529, 0.464238221058, 0, 0, 0.464238221058, 0, 0, 0, 0, 0, 0, 0, 0, 0, 0, 0, 0, 0, 0, 0, 0, 0, 0, 0, 0…	0	20	CUTs	CUT503	sense
-	chrIV	1388579	1388591	+	ACACCAATATTT	3	flanking_window_reference_pA_signal	[0, 0, 0.232119110529, 0, 0.232119110529, 0, 2.08907199476, 0, 0.464238221058, 0, 0, 1.85695288423, 0, 0.696357331587, 1.16059555264, 0, 0, 0, 0.696357331587, 15.3198612949, 0, 0, 0, 1.6248337737, 0, 0, 0, 0, 0, 0, 0, 0, 0, 0, 0, 0, 0, 2.08907199476, 35.0499856899, 0, 0, 2.32119110529, 0, 0.464238221058, 7.65993064745, 0, 0, 0.696357331587, 0, 0, 0, 0, 0.232119110529, 0, 0, 0.232119110529, 0, 0, …	0	14	intergenic_region	INT_0_2060	sense
+	chrIV	768428	768440	+	ATACACATACCT	3	flanking_window_reference_pA_signal	[0, 0, 0, 0, 0, 0, 0, 0, 0, 0, 0, 0, 0, 0, 0, 0, 0, 0, 0, 0, 0, 0, 0, 0, 0, 0, 0, 0, 0, 0, 0, 0, 0, 0, 0, 0, 0, 0, 0, 0, 0, 0, 0, 0, 0, 0, 0, 0, 0, 0, 0, 0, 0, 0, 0, 0, 0, 0, 0, 0, 0, 0, 0, 0, 0, 0, 0, 0, 0.232119110529, 0, 0, 0, 0, 0, 0, 0, 0, 0, 0, 0, 0, 1.16059555264]	0	51	intergenic_region	INT_0_1621	sense
+	chrIV	501683	501695	+	ACAAACCTACAT	3	flanking_window_reference_pA_signal	[0, 0, 0, 0, 0, 0, 0.232119110529, 0, 0, 0, 0, 0, 0, 0, 0, 0, 0, 0, 0, 0, 0, 0, 0, 0, 0, 0, 0, 0, 0, 0, 0, 0.232119110529, 0, 0, 0, 0, 0, 0.232119110529, 0, 0, 0, 0, 0, 0, 0, 0, 0, 4.41026310005, 0, 0, 0.232119110529, 3.2496675474, 0, 0.232119110529, 0, 0, 0, 0, 0, 0, 0, 0, 0, 0.464238221058, 0, 0, 0.232119110529, 0, 0, 0.696357331587, 0, 0.232119110529, 0.464238221058, 0, 0, 0, 0, 0.464238221058…	1.25115	17	CUTs	XUT_4F-248	sense
+	chrIV	1384839	1384851	+	ACGCATATACAT	3	flanking_window_reference_pA_signal	[0, 0, 0, 0, 0, 0, 0, 0, 0, 0, 0, 0, 0, 0, 0, 0, 0, 0, 0, 0, 0, 0, 0, 0, 0, 0.464238221058, 0, 0, 0, 0, 0, 0, 0, 0, 0, 0.232119110529, 0, 0, 0, 0, 0, 0, 0, 0, 0, 0, 0, 0, 0, 0.696357331587, 1.39271466317, 0, 0, 0, 0.464238221058, 0.696357331587, 0, 0.232119110529, 0.232119110529, 6.49933509481, 0, 0, 0.232119110529, 0, 0, 0.696357331587, 0, 0, 0.464238221058, 0, 0, 0, 0, 0, 0, 0, 0.232119110529, …	0	29	3UTR	TFB3	sense
-	chrVIII	511991	512003	-	ACATACATACTT	3	flanking_window_reference_pA_signal	[0, 0, 0.232119110529, 0, 0.232119110529, 0, 0, 0, 2.08907199476, 19.2658861739, 0, 0, 1.85695288423, 5.10662043163, 0, 0, 0, 0, 0, 0, 0, 0, 0, 0, 0, 0, 0, 0, 0, 0, 0, 0, 0, 0, 0, 0, 0, 0, 0, 0, 0, 0, 0, 0, 0, 0, 0, 0, 0, 0, 0, 0, 0, 0, 0, 0, 0, 0, 0, 0, 0, 0, 0, 0, 0, 0, 0.232119110529, 0, 0, 0, 0, 0, 0, 0, 0, 0, 0, 0, 0, 0, 0, 0.928476442115]	0	43	SUTs	SUT598	sense
+	chrVIII	241298	241310	-	ACACTTATAAAT	3	flanking_window_reference_pA_signal	[0, 0, 0, 0, 0, 0, 0, 0, 0, 0, 0, 0, 0, 0, 0, 0, 0, 0, 0, 0, 0, 0, 0.464238221058, 0, 0, 0, 0, 0, 0, 0.464238221058, 0, 0.232119110529, 0, 0.464238221058, 0, 0.464238221058, 0, 0, 0, 0, 0, 0, 0, 0, 0, 1.39271466317, 0, 0, 0, 0, 0, 0, 0, 0, 0.696357331587, 0, 0, 0, 0, 0, 0, 0, 0, 0, 0, 0, 0, 0, 0, 0, 0, 0, 0, 0.232119110529, 0, 0, 0, 0, 0, 0.464238221058, 0, 0]	0.208525	15	CDS	ERG7	sense
-	chrVIII	324566	324578	-	TCAACCATACAA	3	flanking_window_reference_pA_signal	[0.928476442115, 2.78542932635, 0.928476442115, 1.16059555264, 19.0337670634, 0.232119110529, 0.464238221058, 0, 0, 0, 0.232119110529, 0, 0, 0, 0, 0.232119110529, 0.232119110529, 1.39271466317, 0, 0, 0, 0, 0, 0, 0, 0, 0, 0, 0.232119110529, 2.55331021582, 0, 0, 0.232119110529, 0, 0.232119110529, 0, 0, 0, 0, 0, 0, 0, 0, 0.464238221058, 0, 0.232119110529, 0.928476442115, 0, 0, 5.80297776322, 9.74900…	0.625576	48	intergenic_region	INT_0_4268	sense
+	chrVIII	518800	518812	+	ACATAGATACAT	3	flanking_window_reference_pA_signal	[0, 0, 0, 0, 0, 0, 0, 0, 0, 0, 0, 0, 0, 0, 0, 0, 0, 0, 0, 0, 0, 0, 0, 0, 0, 0, 0, 0, 0, 0, 0, 0, 0, 0, 0, 0, 0, 0, 0, 0, 0, 0, 0, 0, 0, 0, 0, 0, 0, 0, 0, 0, 0, 0, 0, 0, 0, 0, 0, 0, 0, 0, 0, 0, 0.232119110529, 0, 0.232119110529, 3.01754843688, 0, 0, 0.464238221058, 14.8556230738, 0, 1.39271466317, 14.1592657423, 0, 0.696357331587, 0, 0, 5.80297776322, 0, 0]	0	41	3UTR	BAT1	sense
+	chrVIII	420306	420318	+	ACAACTATATAT	3	flanking_window_reference_pA_signal	[0, 0, 0, 0, 0, 0, 0, 0, 0, 0, 0, 0, 0, 0, 0, 0, 0, 0, 0, 0, 0, 0, 0, 0, 0, 0, 0.464238221058, 0, 0, 0.464238221058, 0, 0, 0, 0, 0, 0.464238221058, 0, 0, 0, 0, 0, 0, 0, 0, 0, 0, 0, 0, 0, 0, 0, 0, 0, 0, 0, 0, 0, 0, 0, 0, 0, 0, 0, 0, 0, 0.232119110529, 0, 0, 0, 0, 0, 0, 0, 1.6248337737, 0, 0, 0, 0, 0, 0, 0, 0]	1.04263	43	3UTR	YHR159W	sense
+	chrXVI	415487	415499	-	ACACACATAAAT	2	flanking_window_reference_pA_signal	[0, 0, 0, 0, 0, 0, 0, 0, 0, 0, 0, 0, 0, 0, 0, 0, 0, 0, 0, 0, 0, 0, 0, 0, 0, 0, 0, 0, 0, 0, 0, 0, 0, 0, 0, 0, 0, 0, 0, 0, 0, 0.696357331587, 0, 0, 0, 0.232119110529, 0, 0, 0.232119110529, 0.232119110529, 0, 0, 0, 0, 0, 0, 0, 0, 0, 0.232119110529, 0, 0, 0, 0, 0, 0, 0, 0, 0, 0, 0, 0, 1.85695288423, 0, 0, 0, 0, 0, 0, 0, 0, 0]	0	42	3UTR	GCR1	sense
-	chrXVI	672355	672367	-	GCACCCAGACAG	3	flanking_window_reference_pA_signal	[0, 0, 0, 0.232119110529, 0, 0, 0, 0, 0, 0, 0, 0, 0, 0, 0, 0, 0, 0, 0, 0.928476442115, 0, 3.2496675474, 0, 0, 0.928476442115, 0, 9.28476442115, 0, 0, 0, 0, 0, 0, 0, 0, 0, 0, 0, 0, 0, 0, 0.232119110529, 0.464238221058, 0, 0, 0.232119110529, 0, 0.232119110529, 0.232119110529, 0.464238221058, 0.232119110529, 0.232119110529, 0, 0, 0, 0, 0, 0, 0, 0, 0, 0, 0, 0, 0.232119110529, 0, 0, 0, 0, 0, 0.2321191…	0.208525	26	CUTs	CUT908	sense
+	chrXVI	73051	73063	-	ACACACATACAC	2	flanking_window_reference_pA_signal	[0, 0, 0, 0, 0, 0, 0, 0, 0, 0, 0, 0, 0, 0, 0, 0, 0, 0, 0, 0, 0, 0, 0, 0, 0, 0, 0, 0, 0, 0, 0, 0, 0, 0, 0, 0, 0, 0, 0, 0, 0, 0, 0, 0, 0, 0, 0, 0, 0, 0, 0, 0, 0, 0, 0, 0, 0, 0, 0, 0, 0, 0, 0, 0, 0.464238221058, 0, 0, 0, 0, 0, 0, 0, 0, 0, 0, 0, 0, 0, 0, 0, 0.232119110529, 1.39271466317]	0	51	intergenic_region	INT_0_8444	sense
+	chrXVI	319197	319209	-	ATGCCCCTACAT	3	flanking_window_reference_pA_signal	[0, 0, 0, 0, 0, 0, 0, 0, 0, 0, 0, 0, 0, 0, 0, 0, 0, 0, 0, 0, 0, 0, 0, 0, 0, 0, 0, 0, 0, 0, 0, 0, 0, 0, 0, 0, 0, 0, 0, 0, 0, 0, 0, 0, 0, 0, 0, 0, 0, 0, 0, 0, 0, 0, 0, 0, 0, 0, 0, 0, 0, 0, 0, 0, 0, 0, 0, 0, 0, 0, 0, 0, 0, 2.08907199476, 0, 0, 0, 0, 0, 0.232119110529, 0.232119110529, 0]	0	43	SUTs	SUT401	sense
-	chrXVI	645352	645364	+	ACATCCATAGAA	3	flanking_window_reference_pA_signal	[0, 0, 0, 1.16059555264, 0, 0, 0, 1.39271466317, 0, 0, 0, 0, 0, 0, 0, 0.928476442115, 0, 0, 0.232119110529, 0.928476442115, 0, 0.464238221058, 2.78542932635, 0, 0.232119110529, 2.32119110529, 0, 0, 0, 0.232119110529, 0, 0, 0, 0, 0, 0, 0, 0, 3.2496675474, 0, 0, 0.696357331587, 0, 0, 0.464238221058, 22.0513155002, 0, 0, 0, 0, 0, 0, 0, 0, 0, 0, 0, 0, 0, 0, 0, 0, 0, 0, 0, 0, 0, 0, 0.232119110529, 0, …	0	7	SUTs	INT_0_8875	sense
+	chrXVI	785746	785758	+	AAACCGATACGT	3	flanking_window_reference_pA_signal	[0, 0, 0, 0, 0, 0, 0, 0, 0, 0, 0, 0, 0, 0, 0, 0, 0, 0, 0, 0, 0, 0, 0, 0, 0, 0, 0, 0, 0, 0, 0, 0, 0, 0, 0, 0, 0, 0, 0, 0, 0, 0, 0, 0, 0, 0, 0, 0, 0, 0, 0, 0, 0, 0, 0, 0, 0, 0, 0, 0, 0, 0, 0, 0, 0, 0, 0, 0, 0, 0, 0, 0, 0, 0.232119110529, 0, 0, 1.16059555264, 0, 0, 0, 0, 0]	0	46	3UTR	INT_0_8994	antisense
-	chrXVI	244188	244200	+	AAACCCATACAC	2	flanking_window_reference_pA_signal	[0, 0, 0, 0, 0.232119110529, 0, 0, 0, 0, 0, 0, 0, 0.232119110529, 0, 0, 0, 0, 0, 0, 0.232119110529, 0, 0, 0, 0, 0.464238221058, 0, 0, 0, 0, 0, 0.464238221058, 0, 0, 0, 0, 0, 0, 0.696357331587, 0, 0, 0, 0, 0, 0, 0, 0, 0, 0, 0, 0, 0, 0, 0, 0, 0, 0, 0, 0, 0, 0, 0, 0, 0, 0, 0, 0, 0, 0, 0, 0, 0, 0, 0, 0, 0, 0, 0, 0, 0, 0, 0, 0]	4.79609	15	3UTR	XUT_16F-95	antisense
+	chrXVI	631279	631291	+	ACACACATATAT	2	flanking_window_reference_pA_signal	[0, 0, 0, 0, 0, 0, 0, 0, 0, 0, 0, 0, 0, 0, 0, 0, 0, 0, 0, 0, 0, 0, 0, 0, 0, 0, 0, 0, 0, 0, 0, 0, 0, 0, 0, 0, 0, 0, 0, 0, 0, 0, 0, 0, 0, 0, 0, 0, 0, 0, 0, 0, 0, 0, 0, 0, 0, 0, 0, 0, 0, 0, 0, 0, 0, 0, 0, 0, 0, 0, 0, 0.232119110529, 0.232119110529, 0, 0, 0, 0.696357331587, 0, 0, 0, 0, 0]	0	46	3UTR	INT_0_8867	antisense
+	chrXVI	205000	205012	+	ACATCTATACAT	2	flanking_window_reference_pA_signal	[0, 0, 0, 0, 0, 0, 0, 0, 0, 0, 0, 0, 0, 0, 0, 0, 0, 0, 0, 0, 0, 0, 0, 0, 0, 0, 0, 0, 0, 0, 0, 0, 0, 0, 0, 0, 0, 0, 0, 0, 0, 0, 0, 0, 0, 0, 0, 0, 0, 0, 0, 0, 0, 0, 0, 0, 0, 0, 0, 0, 0, 0, 0, 0, 0, 0, 0, 0, 0, 0, 0, 0, 0, 0, 0, 0, 0, 0.464238221058, 8.8205262001, 0, 0, 0]	0	48	3UTR	CTI6	sense
-	chrXVI	482764	482776	+	ATACCCATAACT	3	flanking_window_reference_pA_signal	[0, 0, 0, 0, 0, 0, 0, 0.232119110529, 2.08907199476, 0, 0, 0, 0.232119110529, 0.696357331587, 0, 0, 0, 0.464238221058, 0, 0, 0, 0.232119110529, 0, 0, 0, 0, 0, 0, 0, 0, 0, 0, 0, 0, 0, 1.16059555264, 0, 0, 0, 0, 0, 0.232119110529, 0, 0, 0, 0, 0, 0.232119110529, 0, 0, 0, 0, 0, 0, 0, 0, 0.464238221058, 0.232119110529, 0, 0, 0, 0, 0.232119110529, 0, 0, 0, 0, 0, 0, 0.232119110529, 0, 0, 0, 0, 0, 0.2321…	0.625576	44	SUTs	SUT818	sense
-	chrIII	157253	157265	-	ACACCTATTCAC	3	flanking_window_reference_pA_signal	[0.232119110529, 0, 0, 0.696357331587, 0, 0, 0, 0, 0, 0, 0, 0, 0, 0, 0, 0, 0, 0, 0, 0, 0, 0, 0, 0, 0, 0, 0, 0, 0, 0, 0, 0, 0, 0, 0, 0, 0.232119110529, 0, 0, 0, 0, 0, 0, 0, 0, 0, 0, 0, 0, 0, 0, 0, 0, 0, 0, 0, 0, 0, 0, 0, 0, 0, 0, 0, 0, 0, 0, 0, 0, 0, 0, 0, 0, 0, 0, 0, 0, 0, 0, 0, 0, 0]	0.208525	49	3UTR	YCR022C	sense
+	chrIII	210655	210667	-	ACACTTATACAT	2	flanking_window_reference_pA_signal	[0, 0, 0, 0, 0, 0, 0, 0, 0, 0, 0, 0, 0, 0, 0, 0, 0, 0, 0, 0, 0, 0, 0, 0, 0, 0, 0, 0, 0, 0, 0, 0, 0, 0, 0, 0, 0, 0, 0, 0, 0, 0, 0, 0, 0, 0, 0, 0, 0, 0.232119110529, 0, 0, 0, 0, 0, 0, 0, 0, 0, 0, 0, 0, 0, 0, 0, 0, 0, 0, 0, 0, 0, 0, 0, 0, 0.232119110529, 0.232119110529, 0, 0, 0.696357331587, 0, 0, 0]	0	48	XUTs	XUT_3F-99	sense
+	chrIII	52472	52484	-	ACATACATACAT	2	flanking_window_reference_pA_signal	[0, 0, 0, 0, 0, 0, 0, 0, 0, 0, 0, 0, 0, 0, 0, 0, 0, 0, 0, 0, 0, 0, 0, 0, 0, 0, 0, 0, 0, 0.232119110529, 0, 0, 0, 0, 0, 0, 0, 0, 0, 0, 0, 0, 0, 0, 0, 0, 0, 0, 0.232119110529, 0, 0, 0.464238221058, 5.10662043163, 0, 0.464238221058, 0, 0, 0.928476442115, 0, 0, 0.232119110529, 0.232119110529, 0, 0, 0.464238221058, 0, 0, 0, 0, 0, 0.232119110529, 0, 0, 0, 2.08907199476, 35.5142239109, 0, 0, 0, 0.232119…	0.625576	45	3UTR	GLK1	sense
+	chrIII	259318	259330	-	ATACGCATATAT	3	flanking_window_reference_pA_signal	[0, 0, 0, 0, 0, 0, 0, 0, 0, 0, 0, 0, 0, 0, 0, 0, 0, 0, 0, 0, 0, 0, 0, 0, 0, 0, 0, 0, 0, 0, 0, 0, 0, 0, 0, 0, 0, 0, 0, 0, 0, 0, 0, 0, 0, 0, 0.696357331587, 0, 0.696357331587, 0, 0, 0, 0, 0.464238221058, 0, 0, 0, 0, 0, 0, 0, 0, 0, 0, 0, 0.232119110529, 0, 0, 0, 0.232119110529, 0, 0, 1.6248337737, 11.6059555264, 0, 1.6248337737, 0, 0.928476442115, 0, 0, 0, 1.16059555264]	1.04263	43	3UTR	AHC2	sense
+	chrIII	60771	60783	+	ATACATATACAT	3	flanking_window_reference_pA_signal	[0, 0, 0, 0, 0, 0, 0, 0, 0, 0, 0, 0, 0, 0, 0, 0, 0, 0, 0, 0, 0, 0, 0, 0, 0, 0, 0, 0, 0, 0, 0, 0, 0, 0, 0, 0, 0, 0, 0, 0, 0, 0, 0, 0, 0, 0, 0, 0, 0, 0, 0, 0, 0, 0, 0, 0, 0, 0, 0, 0, 0, 0, 0.232119110529, 0, 0.696357331587, 0, 0, 0, 0, 0, 0.464238221058, 0.928476442115, 0.232119110529, 0, 0.464238221058, 0.232119110529, 0.232119110529, 0, 0, 0, 0.928476442115, 0]	0	41	3UTR	GFD2	sense
+	chrVII	227574	227586	-	ATACATATACAT	3	flanking_window_reference_pA_signal	[0, 0, 0, 0, 0, 0, 0, 0, 0, 0, 0, 0, 0, 0, 0, 0, 0, 0, 0, 0, 0, 0, 0, 0, 0, 0, 0, 0, 0, 0, 0, 0, 0, 0, 0, 0, 0, 0, 0, 0, 0, 0, 0, 0, 0, 0, 0, 0.232119110529, 0, 0, 0, 0.232119110529, 0, 0, 1.16059555264, 0, 0, 0, 0, 0, 0, 0, 0.696357331587, 0, 0, 3.94602487899, 0, 0, 0, 0, 0, 0, 3.94602487899, 0, 0, 0, 0, 0, 0.232119110529, 0, 4.41026310005, 3.48178665793]	0.208525	50	3UTR	ARO2	sense
+	chrVII	908825	908837	-	ACATCCATACTT	2	flanking_window_reference_pA_signal	[0, 0, 0, 0, 0, 0, 0, 0, 0, 0, 0, 0, 0, 0, 0, 0.696357331587, 0, 0, 0, 0, 0, 0.232119110529, 0, 0, 0.464238221058, 0, 0, 3.48178665793, 88.669500222, 0, 0, 0, 9.74900264221, 6.26721598428, 0, 1.39271466317, 0.696357331587, 2.32119110529, 0, 0.232119110529, 1.16059555264, 2.78542932635, 0, 5.33873954216, 0, 0, 7.19569242639, 0, 0, 8.8205262001, 0, 0, 1.16059555264, 0, 0, 0, 0.464238221058, 0, 2.08…	1.25115	34	3UTR	ADE3	sense
+	chrVII	131218	131230	-	ACACAATTACAT	3	flanking_window_reference_pA_signal	[0, 0, 0, 0, 0, 0, 0, 0, 0, 0, 0, 0, 0, 0, 0, 0, 0, 0, 0, 0, 0, 0, 0, 0, 0, 0, 0, 0, 0, 0, 0, 0, 0, 0, 0, 0, 0, 0, 0, 0, 0, 0, 0, 0, 0, 0, 0, 0, 0, 0, 0, 0, 0, 0, 0, 0, 0, 0, 0, 0, 0, 0, 0, 0, 0, 0, 0, 0, 0.696357331587, 0, 0, 0, 0, 0, 0.232119110529, 6.26721598428, 26.2294594898, 0, 3.94602487899, 0, 0.464238221058, 0]	0	46	3UTR	DSD1	sense
-	chrVII	94613	94625	+	ACGTACATACAT	3	flanking_window_reference_pA_signal	[0.464238221058, 0.696357331587, 0, 0, 1.6248337737, 0, 4.41026310005, 16.7125759581, 0, 0, 0.696357331587, 0, 0, 0.232119110529, 0.928476442115, 0, 0, 0, 0.232119110529, 0.232119110529, 0, 0.232119110529, 0.464238221058, 0, 0, 0, 0.464238221058, 0, 0, 0, 0, 0, 0, 0, 0, 0, 0, 0, 0, 0, 0, 0.232119110529, 0, 0, 0, 0, 0, 0, 0, 0, 0, 0, 0, 0, 0, 0, 0.232119110529, 0, 0, 0, 0, 0, 0, 0, 0, 0, 0, 0, 0, …	0.417051	45	SUTs	SUT535	sense
+	chrXI	260516	260528	-	GTACACATACAT	3	flanking_window_reference_pA_signal	[0, 0, 0, 0, 0, 0, 0, 0, 0, 0, 0, 0, 0, 0, 0, 0, 0, 0, 0, 0, 0, 0, 0, 0, 0, 0, 0, 0, 0, 0, 0, 0, 0, 0, 0, 0, 0, 0, 0, 0, 0, 0, 0, 0, 0, 0, 0, 0, 0, 0, 0, 0, 0, 0, 0, 0, 0, 0, 0, 0, 0, 0, 0, 0, 0, 0, 0, 0, 0, 0, 0, 0, 0, 0, 0, 0, 0, 1.6248337737, 0, 0, 0, 0]	0.417051	47	XUTs	XUT_11F-113	sense
+	chrXI	491370	491382	-	ACCCCCATAAAA	3	flanking_window_reference_pA_signal	[0, 0, 0, 0, 0, 0.928476442115, 0, 0, 0, 0, 0, 0.232119110529, 0, 0, 0, 0, 0, 0, 0, 0, 0, 0, 0, 0, 0, 0, 0, 0, 0, 0.232119110529, 0, 0.232119110529, 0.232119110529, 0.232119110529, 0, 0.232119110529, 0, 0, 0, 0, 0, 0, 0, 0, 0, 0, 0, 0, 0, 0, 0, 0, 0, 0, 0, 0, 0, 0, 0, 0, 0, 0, 0, 0, 0, 0, 0, 0, 0, 0, 0, 0, 0, 0, 0, 0, 0, 0, 0, 0, 0, 0]	3.54493	-25	5UTR	BCH2	sense
+	chrXI	551431	551443	+	AAATCCGTACAT	3	flanking_window_reference_pA_signal	[0, 0, 0, 0, 0, 0, 0, 0, 0.232119110529, 0.696357331587, 0, 0, 0, 0, 0, 0, 0, 0, 0, 0, 0, 0, 0, 1.6248337737, 0, 0, 0, 0.928476442115, 5.33873954216, 86.5804282273, 0, 0, 0, 0, 0, 0, 0, 0, 0, 0, 0, 0, 0, 0, 0, 7.19569242639, 0, 0, 0, 0, 0.232119110529, 0, 0.928476442115, 0, 0, 0, 0, 0, 0, 0, 0, 0, 0, 0, 0.464238221058, 0, 0.232119110529, 0, 0, 0, 0, 0, 0, 0, 0, 0, 0, 0, 0, 0, 0, 0]	5.63019	-1	3UTR	INT_0_5419	antisense
+	chrXI	465228	465240	+	ACAATCATATAT	3	flanking_window_reference_pA_signal	[0, 0, 0, 0, 0, 0, 0, 0, 0, 0, 0, 0, 0, 0, 0, 0, 0, 0, 0, 0, 0, 0, 0, 0, 0, 0, 0, 0, 0, 0, 0, 0, 0, 0, 0, 0, 0, 0, 0, 0, 0, 0, 0, 0, 0, 0, 0, 5.10662043163, 0, 0, 0, 1.16059555264, 0.232119110529, 0, 0.464238221058, 0, 0.232119110529, 0, 0, 0, 0.464238221058, 6.73145420534, 0.696357331587, 0.232119110529, 0, 0.696357331587, 0.232119110529, 0.232119110529, 0.232119110529, 0.232119110529, 0, 0, 0, …	0	31	3UTR	INT_0_5360	sense
-	chrXI	299253	299265	+	TCACCCGGACAT	3	flanking_window_reference_pA_signal	[0, 0, 0.232119110529, 0, 0.232119110529, 0, 0, 0, 0, 0, 0, 0, 0, 0, 0, 0, 0, 0, 0, 0, 0, 0, 0, 0, 0, 0, 0, 0.232119110529, 0, 0, 0, 0, 0, 0.232119110529, 0, 0, 0, 0, 0, 0, 0, 0, 0, 0, 0, 0, 0, 0, 0, 0, 0, 0, 0, 0, 0, 0, 0, 0, 0, 0, 0, 0, 0, 0, 0, 0, 0, 0.232119110529, 0, 0, 0, 0, 0, 0, 0, 0, 0, 0, 0, 0, 0, 0]	0.208525	50	intergenic_region	INT_0_5228	sense
-	chrV	322025	322037	-	GCACCCAAACAT	2	flanking_window_reference_pA_signal	[0, 0.464238221058, 0, 0, 0, 0.232119110529, 0, 0, 0.232119110529, 0, 0, 0, 0, 0, 0, 0, 0.232119110529, 0, 0, 0, 0, 0, 0, 0, 0.232119110529, 0, 0, 0, 0, 0, 0, 0, 0, 0, 0, 0, 0, 0, 0, 0, 0, 0, 0, 0, 0, 0, 0, 0, 0, 0, 0, 0, 0, 0, 0, 0, 0, 0, 0, 0, 0, 0, 0, 0, 0, 0, 0, 0, 0, 0, 0, 0, 0, 0, 0, 0, 0, 0, 0, 0, 0, 0]	0.417051	51	intergenic_region	INT_0_2803	sense
-	chrV	517622	517634	-	AAACCCACACGT	3	flanking_window_reference_pA_signal	[1.6248337737, 0, 0.696357331587, 0, 0.464238221058, 0, 0.232119110529, 0.696357331587, 5.33873954216, 0, 0, 0, 0, 0.232119110529, 0, 0, 0, 0.232119110529, 0, 0, 0, 0, 0, 0, 0.928476442115, 0, 0, 0, 0, 0, 0, 0, 0, 0, 0, 0, 0, 0, 0, 0, 0, 0, 0, 0, 0, 0, 0, 0, 0, 0, 0, 0, 0, 0, 0, 0, 0, 0, 0, 0, 0, 0, 0, 0, 0, 0, 0.696357331587, 0, 0, 0, 0, 0, 0, 0, 0, 0, 0, 0.232119110529, 0, 0, 0, 0]	0	44	intergenic_region	INT_0_2951	sense
+	chrV	148209	148221	-	AAACCCAGAGAT	3	flanking_window_reference_pA_signal	[0, 0, 0, 0, 0, 0, 0, 0, 0, 0, 0, 0, 0, 0, 0, 0, 0, 0, 0, 0, 0, 0, 0, 0, 0, 0, 0, 0, 0, 0, 0, 0, 0, 0, 0, 0, 0, 0, 0, 0, 0, 0, 0, 0, 0, 0, 0, 0, 0, 0, 0, 0, 0, 0, 0, 0, 0, 0, 0, 0.232119110529, 0, 0, 0, 0, 0, 0.232119110529, 0, 0, 0, 0, 0, 0, 0, 0.696357331587, 0, 0, 0.464238221058, 0, 0, 0, 0, 0]	0	43	3UTR	YEA4	sense
+	chrV	90049	90061	-	ACACATATTCAT	3	flanking_window_reference_pA_signal	[0, 0, 0, 0, 0, 0, 0, 0, 0, 0.232119110529, 0.232119110529, 0.928476442115, 1.85695288423, 0.696357331587, 0, 2.55331021582, 13.2307893001, 0, 0.696357331587, 0, 0, 0, 0, 0, 0, 0, 0, 0, 0.696357331587, 0, 0, 0, 0, 0, 0, 0, 0, 0, 0, 0, 0, 0, 0.464238221058, 0, 1.6248337737, 0, 0, 0, 0, 0.464238221058, 0.928476442115, 5.10662043163, 0, 1.16059555264, 9.28476442115, 0, 0.232119110529, 0.232119110529…	22.1037	-14	3UTR	MCM3	sense
+	chrV	343291	343303	+	ACATTTATACAT	3	flanking_window_reference_pA_signal	[0, 0, 0, 0, 0, 0, 0, 0, 0, 0, 0, 0, 0, 0, 0, 0, 0, 0, 0, 0, 0, 0, 0, 0, 0, 0, 0, 0, 0, 0, 0, 0, 0, 0, 0, 0, 0, 0, 0, 0, 0, 0, 0, 0, 0, 0, 0, 0, 0, 0, 0, 0, 0, 0, 0, 0, 0, 0, 0, 0.696357331587, 0, 0, 0, 0, 0, 0, 0.464238221058, 0, 0, 0, 0, 0.928476442115, 3.2496675474, 0, 0, 0.696357331587, 0.464238221058, 0.232119110529, 0.464238221058, 0.232119110529, 0, 0]	0	42	3UTR	IES5	sense
+	chrV	86283	86295	+	ACACAAATAAAT	3	flanking_window_reference_pA_signal	[0, 0, 0, 0, 0, 0, 0, 0, 0, 0, 0, 0, 0, 0, 0, 0, 0, 0, 0, 0, 0, 0, 0, 0, 0, 0, 0, 0, 0, 0, 0, 0, 0, 0, 0, 0, 0, 0.464238221058, 0, 0, 0, 0, 0, 0, 0, 0, 0, 0, 0, 0, 0.232119110529, 0.696357331587, 0, 0, 0, 0.232119110529, 0, 0.928476442115, 1.16059555264, 0, 0, 0, 0.464238221058, 0, 0, 0, 0, 0, 0, 0, 0, 0, 0, 0, 0, 0, 0, 0, 0, 0, 0, 0]	0.625576	28	3UTR	HYP2	sense
+	chrV	148137	148149	+	AAACTCATTCAT	3	flanking_window_reference_pA_signal	[0, 0, 0, 0, 0, 0, 0, 0, 0, 0, 0, 0.232119110529, 0.928476442115, 0, 0, 0, 0, 0, 0.232119110529, 0, 0, 0, 0, 0, 0, 0, 0, 0, 0, 0, 0, 0, 0, 0, 0, 0, 0, 0, 0, 0, 0, 0, 0, 0, 0, 0, 0, 0, 0, 0, 0, 0, 0, 0, 0, 0, 0, 0, 0, 0, 0, 0, 0, 0, 0, 0, 0, 0, 0, 0, 0, 0, 0, 0, 0, 0, 0, 0, 0, 0, 0, 0]	1.04263	-18	3UTR	GIM4	sense
+	chrV	303275	303287	+	ATACGCATATAT	3	flanking_window_reference_pA_signal	[0, 0, 0, 0, 0, 0, 0, 0, 0, 0, 0, 0, 0, 0, 0, 0, 0, 0, 0, 0, 0, 0, 0, 0, 0, 0, 0, 0, 0, 0, 0, 0, 0, 0, 0, 0, 0, 0, 0, 0.232119110529, 0, 0, 0, 0, 0, 0, 0, 0.464238221058, 0.232119110529, 0, 0.464238221058, 0, 0, 0, 0, 0.232119110529, 0.232119110529, 0, 0, 0, 0, 0.696357331587, 5.80297776322, 0, 0, 0.232119110529, 0.928476442115, 0, 1.85695288423, 6.73145420534, 0, 0, 41.5493207847, 0, 0, 15.08774…	1.25115	42	3UTR	VTC1	sense
+	chrXII	789761	789773	-	ACACAGATATAT	3	flanking_window_reference_pA_signal	[0, 0, 0, 0, 0, 0, 0, 0, 0, 0, 0, 0, 0, 0, 0, 0, 0, 0, 0, 0, 0, 0, 0, 0, 0, 0, 0, 0, 0, 0, 0, 0, 0, 0, 0, 0, 0, 0, 0, 0, 0, 0, 0, 0, 0, 0, 0, 0.232119110529, 0, 0, 0, 0, 0, 0, 0, 0, 0, 0, 0, 0, 0, 0, 0, 0, 0.232119110529, 0.464238221058, 0, 0.928476442115, 0, 0, 0, 0.232119110529, 0, 0.232119110529, 2.55331021582, 0, 3.94602487899, 0, 0, 0, 0.464238221058, 0.696357331587]	0	46	3UTR	CHS5	sense
-	chrXII	499590	499602	-	AGACGCATACAA	3	flanking_window_reference_pA_signal	[0.232119110529, 0.696357331587, 0, 0, 0.232119110529, 0, 0.232119110529, 0.232119110529, 0.232119110529, 0, 0.464238221058, 0, 0, 0, 0, 0.464238221058, 0, 0, 0, 0, 0, 0, 0, 0, 0, 0, 0, 0.232119110529, 1.85695288423, 0, 0, 0, 0, 0, 0, 0, 0, 0, 0, 0, 0.232119110529, 0, 0, 0, 0, 0, 0, 0, 0, 0, 0, 0, 0, 0.464238221058, 0, 0, 0, 0, 0, 0, 0, 0, 0, 0, 0, 0, 0, 0, 0, 0, 0.464238221058, 0, 0.464238221058…	0	-23	CDS	UPS2	sense
-	chrXII	410288	410300	-	GCAACCATACAG	3	flanking_window_reference_pA_signal	[0, 0, 0, 0, 0, 0.464238221058, 0, 0, 0, 0.696357331587, 4.41026310005, 0, 0, 0, 0.464238221058, 0.464238221058, 0.232119110529, 0, 0.232119110529, 0, 0.232119110529, 0.464238221058, 0.232119110529, 0, 0, 1.16059555264, 0, 0.232119110529, 0, 0, 0, 0, 0, 0, 0, 0, 0, 0, 0, 0, 0, 0, 0, 0, 0, 0, 0, 0, 0, 0, 0, 0, 0, 0, 0, 0, 0, 0, 0, 0, 0, 0, 0, 0, 0, 0, 0, 0, 0, 0, 0, 0, 0, 0, 0, 0, 0, 0, 0, 0, 0, 0]	0	42	intergenic_region	INT_0_5780	sense
+	chrXII	434124	434136	-	AAACGCATTCAT	3	flanking_window_reference_pA_signal	[0, 0, 0, 0, 0, 0, 0.232119110529, 0, 0, 0, 0, 0, 0, 0, 0.232119110529, 0, 0, 0, 0.464238221058, 0, 0, 0, 0.696357331587, 7.89204975798, 0, 2.08907199476, 0, 0, 0, 0.232119110529, 0, 0.464238221058, 0, 0, 0, 0.232119110529, 0, 0, 0, 0, 0, 0, 0.696357331587, 0, 0, 5.10662043163, 0, 0.232119110529, 0.696357331587, 11.1417173054, 0, 0.464238221058, 0, 0, 0, 0, 0.696357331587, 0.464238221058, 2.32119…	11.0518	19	3UTR	YLR146W-A	sense
+	chrXII	445325	445337	+	ATATCTATACAT	3	flanking_window_reference_pA_signal	[0, 0, 0, 0, 0, 0, 0, 0, 0, 0, 0, 0, 0, 0, 0, 0, 0, 0, 0, 0, 0, 0, 0, 0, 0, 0, 0, 0, 0, 0, 0, 0, 0, 0, 0, 0, 0, 0, 0, 0, 0, 0, 0, 0, 0, 0, 0, 0, 0, 0, 0, 0.464238221058, 0, 0, 0, 0, 0, 0, 0, 0, 0, 0, 0, 0, 0, 0, 0, 0, 0, 0, 0.464238221058, 0, 0, 0, 0, 0, 0.232119110529, 0, 0, 0, 0, 0]	0.208525	21	CUTs	XUT_12F-184	sense
+	chrXII	559329	559341	+	TCACCCACGCAT	3	flanking_window_reference_pA_signal	[0, 0, 0, 0, 0, 0, 0, 0, 0, 0, 0, 0, 0, 0, 0, 0, 0, 0, 0, 0, 0, 0, 0, 0, 0, 0, 0, 0, 0, 0, 0, 0, 0, 0, 0, 0, 0, 0, 0, 3.01754843688, 0, 1.85695288423, 19.0337670634, 0, 0, 0, 0, 6.26721598428, 0, 0, 0, 0, 0, 0, 0, 0.232119110529, 5.10662043163, 0, 0, 0.464238221058, 0, 0, 0, 0, 0.696357331587, 0.696357331587, 0, 0, 0, 0, 0, 0, 0, 0, 0, 0, 0, 0, 0, 0, 0, 0]	0	12	3UTR	HRD3	sense
+	chrXII	142954	142966	+	ATAACCATACAT	2	flanking_window_reference_pA_signal	[0, 0, 0, 0, 0, 0, 0, 0, 0, 0, 0, 0, 0, 0, 0, 0, 0, 0, 0, 0, 0, 0, 0, 0, 0, 0, 0, 0, 0, 0, 0, 0, 0, 0, 0, 0, 0, 0, 0, 0, 0, 0, 0, 0, 0, 0, 0, 0.232119110529, 0, 0, 0, 0, 0, 0.464238221058, 0, 0.232119110529, 0, 0, 0, 0, 0, 0, 0, 0, 0, 0, 0, 0, 0.232119110529, 4.17814398952, 0, 0, 15.784099516, 0.232119110529, 0, 0, 1.39271466317, 0, 0.232119110529, 0, 0, 0.232119110529]	0	42	3UTR	ORC3	sense
-	chrXII	674053	674065	+	AGACCCATGCAC	3	flanking_window_reference_pA_signal	[0, 0, 0, 0.232119110529, 0, 1.39271466317, 0, 0, 0, 0, 0, 0, 0, 0, 0, 0, 0, 0, 0, 0, 0, 0, 0, 0, 0, 0, 0, 0, 0, 0, 0.232119110529, 0, 0, 0, 0, 0, 0, 0, 0, 0, 0, 0, 0, 0, 0, 0, 0, 0, 0, 0, 0, 0, 0, 0, 0, 0, 0, 0, 0, 0, 0, 0, 0, 0, 0, 0, 0, 0, 0, 0, 0, 0, 0, 0, 0, 0, 0, 0, 0, 0, 0, 0]	0.208525	47	intergenic_region	INT_0_5981	sense
+	chrXII	262964	262976	+	ACATCCATACAT	1	flanking_window_reference_pA_signal	[0, 0, 0, 0, 0, 0.232119110529, 0, 3.01754843688, 0, 0, 0, 0, 0, 0, 0, 0, 0, 0, 0, 0, 0, 0, 0, 0, 0, 0, 0, 0, 0, 0, 0, 0, 0, 0, 0, 0, 0, 0, 0, 0, 0, 0, 0, 0.232119110529, 0, 0, 0, 0.232119110529, 1.85695288423, 0, 0, 0, 0, 0, 0, 0, 0, 0, 0, 0, 0, 0, 0, 0, 0, 0, 0, 0, 0, 0, 0, 0, 0, 0, 0, 0, 0, 0, 0, 0, 0, 0]	6.04724	-23	3UTR	FRS1	sense

## Sheet: Rap1p_passive_RNA_seq
cluster peak strand	cluster peak chromosome	motif start	motif end	motif_strand	motif_sequence	mismatches from consensus	category	criteria for calling site	total cluster signal	distance from motif boundary to cluster peak (bp)	type of region	gene name	gene strand
+	chrIX	382286	382298	-	GCACCCACACAT	2	flanking_reference_RNA_seq_expression_values	2.7503	2.30737	N/A	CDS	RPR2	sense
-	chrIX	99810	99822	-	ACACCAGTACAT	2	flanking_reference_RNA_seq_expression_values	0.117425	1.15368	N/A	3UTR	CSM2	sense
-	chrX	291311	291323	-	ACACCCAACTAT	3	flanking_reference_RNA_seq_expression_values	0	8.81415	N/A	CDS	PRY3	sense
-	chrX	126921	126933	-	ACACCTATAGGT	3	flanking_reference_RNA_seq_expression_values	0.543469	2.90729	N/A	CDS	SSY5	sense
-	chrX	690714	690726	+	ACACCCGTACAC	2	flanking_reference_RNA_seq_expression_values	0	1.43057	N/A	3UTR	INT_0_4980	antisense
-	chrII	391766	391778	-	ACACCTTTTCAT	3	flanking_reference_RNA_seq_expression_values	0.0416174	6.73752	N/A	3UTR	SLM4	sense
-	chrII	164021	164033	-	AGAATCATACAT	3	flanking_reference_RNA_seq_expression_values	0.0782832	24.1351	N/A	5UTR	PET9	sense
-	chrII	496841	496853	-	ATACCCAGACTT	3	flanking_reference_RNA_seq_expression_values	0	2.86114	N/A	CDS	SHE3	sense
+	chrII	172072	172084	-	ACATACATACAG	3	flanking_reference_RNA_seq_expression_values	4.08693	3.36876	N/A	3UTR	RRN10	sense
+	chrII	555613	555625	+	ACTACCATACAT	2	flanking_reference_RNA_seq_expression_values	2.10836	1.7536	N/A	SUTs	SUT020	sense
+	chrII	308057	308069	+	ACACCCACACAC	2	flanking_reference_RNA_seq_expression_values	13.6773	5.30695	N/A	intergenic	TLC1	sense
-	chrII	615186	615198	+	CAACCCATACAT	2	flanking_reference_RNA_seq_expression_values	0.0515051	4.06097	N/A	CDS	YBR197C	sense
-	chrII	663079	663091	+	ACTACAATACAT	3	flanking_reference_RNA_seq_expression_values	0	2.81499	N/A	CDS	YBR220C	sense
-	chrVI	224794	224806	-	ACACCTACACAC	3	flanking_reference_RNA_seq_expression_values	0.0317262	27.6423	N/A	3UTR	PHO4	sense
+	chrVI	192299	192311	-	ACAACCAAACTT	3	flanking_reference_RNA_seq_expression_values	1.79439	1.29213	N/A	5UTR	INT_0_3127	sense
+	chrXV	882401	882413	-	ACACCCTTCCAC	3	flanking_reference_RNA_seq_expression_values	3.11413	2.39966	N/A	3UTR	YOR302W	sense
+	chrXV	1004247	1004259	-	ACACCCTTGCAC	3	flanking_reference_RNA_seq_expression_values	4.57477	2.58425	N/A	5UTR	SUT388	sense
+	chrXV	837299	837311	-	AATCCTATACAT	3	flanking_reference_RNA_seq_expression_values	1.58261	1.33827	N/A	intergenic_region	INT_0_8206	sense
-	chrXV	976747	976759	-	AAACACATACAC	3	flanking_reference_RNA_seq_expression_values	0.0399692	4.75318	N/A	3UTR	TYE7	sense
-	chrXV	931119	931131	-	TCAGGCATACAT	3	flanking_reference_RNA_seq_expression_values	0.0523295	2.44581	N/A	5UTR	SNC2	sense
-	chrXV	877053	877065	-	ACACGTATATAT	3	flanking_reference_RNA_seq_expression_values	0.0321392	1.06139	N/A	3UTR	MBF1	sense
-	chrXV	93404	93416	+	AAACCCTTAGAT	3	flanking_reference_RNA_seq_expression_values	0	26.2117	N/A	CDS	RPL18A	sense
+	chrXIV	66006	66018	-	GCACCCATACCC	3	flanking_reference_RNA_seq_expression_values	13.1792	8.44497	N/A	CDS	TOS6	sense
-	chrXIV	446803	446815	+	ACACCCATATCG	3	flanking_reference_RNA_seq_expression_values	0.423979	1.06139	N/A	CDS	YNL095C	sense
+	chrXIV	336267	336279	+	ACATCGATACTT	3	flanking_reference_RNA_seq_expression_values	2.05562	1.33827	N/A	5UTR	SUT328	sense
-	chrXIV	349343	349355	+	GAACCCATACAT	2	flanking_reference_RNA_seq_expression_values	0.0910587	5.16851	N/A	3UTR	PGA2	sense
-	chrXIV	661531	661543	+	ACACGAATAAAT	3	flanking_reference_RNA_seq_expression_values	0	3.04573	N/A	5UTR	INT_0_7462	antisense
-	chrXIV	498333	498345	+	ACACCAATATTT	3	flanking_reference_RNA_seq_expression_values	0	3.13802	N/A	5UTR	FKH2	sense
+	chrXIV	366424	366436	+	ACATCCATAAAT	2	flanking_reference_RNA_seq_expression_values	4.22949	3.23032	N/A	CDS	YSF3	sense
-	chrXIII	271265	271277	-	ACACAAAAACAT	3	flanking_reference_RNA_seq_expression_values	0.0193665	1.43057	N/A	3UTR	CDC5	sense
-	chrXIII	627817	627829	-	ACACGCACAAAT	3	flanking_reference_RNA_seq_expression_values	0	1.89204	N/A	5UTR	SSO2	sense
-	chrXIII	500975	500987	+	ACATCCGTACAT	2	flanking_reference_RNA_seq_expression_values	0.00453259	1.89204	N/A	3UTR	INT_0_6644	sense
+	chrXIII	804527	804539	+	AGACCCATACTG	3	flanking_reference_RNA_seq_expression_values	14.6403	10.4293	N/A	CDS	TMA23	sense
-	chrIV	1428962	1428974	-	ACACCAATTGAT	3	flanking_reference_RNA_seq_expression_values	0.141739	6.46064	N/A	3UTR	RIB3	sense
-	chrIV	392660	392672	-	ACACCCATGCAT	1	flanking_reference_RNA_seq_expression_values	0.0486203	2.35352	N/A	CDS	SLM3	sense
-	chrIV	431547	431559	-	AAACCCATACAA	2	flanking_reference_RNA_seq_expression_values	0.0346091	1.38442	N/A	intergenic_region	INT_0_1381	sense
-	chrIV	134968	134980	+	ACACCCATCGTT	3	flanking_reference_RNA_seq_expression_values	0.259166	1.19983	N/A	SUTs	XUT_4R-57	sense
+	chrIV	544409	544421	+	TCTACCATACAT	3	flanking_reference_RNA_seq_expression_values	1.86856	1.52286	N/A	SUTs	XUT_4F-267	sense
-	chrIV	976662	976674	+	GTACCCATACAC	3	flanking_reference_RNA_seq_expression_values	0.278121	7.0144	N/A	3UTR	SWM1	sense
+	chrIV	704305	704317	+	ACCGCCATAGAT	3	flanking_reference_RNA_seq_expression_values	1.86485	1.56901	N/A	3UTR	SWF1	sense
-	chrIV	1383435	1383447	+	AGAGCCATTCAT	3	flanking_reference_RNA_seq_expression_values	0.055211	1.70745	N/A	5UTR	PFA5	sense
-	chrIV	62129	62141	+	ACTCCCTTATAT	3	flanking_reference_RNA_seq_expression_values	0.185824	1.01524	N/A	3UTR	FMP45	sense
-	chrVIII	548602	548614	-	AAACCCGTACGT	3	flanking_reference_RNA_seq_expression_values	0	2.58425	N/A	CDS	YHR214C-C	sense
+	chrVIII	175254	175266	+	ACACCCAGTCTT	3	flanking_reference_RNA_seq_expression_values	6.92911	3.87638	N/A	CDS	YHR032W-A	sense
+	chrVIII	175181	175193	+	AGACCCATACAT	1	flanking_reference_RNA_seq_expression_values	8.25173	5.21466	N/A	5UTR	YHR032W-A	sense
-	chrXVI	198306	198318	-	ACTCTTATACAT	3	flanking_reference_RNA_seq_expression_values	0.234446	3.78409	N/A	5UTR	MRN1	sense
-	chrIII	68534	68546	-	AAACCCATGCAC	3	flanking_reference_RNA_seq_expression_values	0	2.49196	N/A	3UTR	BIK1	sense
+	chrIII	238775	238787	+	AGACCCATACAT	1	flanking_reference_RNA_seq_expression_values	2.47507	1.93819	N/A	CDS	ATG15	sense
+	chrVII	905585	905597	-	ACACCCATAGAC	2	flanking_reference_RNA_seq_expression_values	2.7091	2.03049	N/A	CDS	YCH1	sense
+	chrVII	271749	271761	-	ACGCCCAAACAC	3	flanking_reference_RNA_seq_expression_values	8.29458	3.92253	N/A	CDS	SCS3	sense
-	chrVII	482758	482770	-	ACACACATTCAA	3	flanking_reference_RNA_seq_expression_values	0	12.5982	N/A	3UTR	YGL007C-A	sense
-	chrVII	397589	397601	-	ACACACGTCCAT	3	flanking_reference_RNA_seq_expression_values	0.0119496	7.9835	N/A	5UTR	SDS23	sense
-	chrVII	884522	884534	+	ACTCCCTTACGT	3	flanking_reference_RNA_seq_expression_values	0.0053567	2.49196	N/A	CDS	PDX1	sense
+	chrXI	232129	232141	-	AGACCAATAAAT	3	flanking_reference_RNA_seq_expression_values	7.76059	5.81457	N/A	5UTR	HAP4	sense
+	chrXI	488215	488227	-	ACACCCACGCCT	3	flanking_reference_RNA_seq_expression_values	9.04365	6.87596	N/A	CDS	RPC37	sense
+	chrXI	356604	356616	+	ACCACCTTACAT	3	flanking_reference_RNA_seq_expression_values	11.6881	7.8912	N/A	CDS	YKL044W	sense
+	chrV	269127	269139	+	ATTCCCATACAT	2	flanking_reference_RNA_seq_expression_values	5.41161	4.384	N/A	SUTs	XUT_5F-128	sense
-	chrXII	65500	65512	-	ACAGCCGTACAT	2	flanking_reference_RNA_seq_expression_values	0	2.35352	N/A	3UTR	ENT4	sense
-	chrXII	1052690	1052702	-	ACTGCCATACAC	3	flanking_reference_RNA_seq_expression_values	0	1.01524	N/A	XUTs	XUT_12R-389	sense
-	chrXII	388585	388597	-	ACACCCTCACAT	2	flanking_reference_RNA_seq_expression_values	0.395959	1.24598	N/A	3UTR	YPS1	sense
+	chrXII	519211	519223	+	AGACCCATTCAA	3	flanking_reference_RNA_seq_expression_values	3.23691	2.07663	N/A	CDS	SWI6	sense

## Sheet: Abf1p_sites_passive_PATs_upstre
cluster peak strand	cluster peak chromosome	motif start	motif end	motif_strand	motif_sequence	mismatches from consensus	category	criteria for calling site	total cluster signal	distance from motif boundary to cluster peak (bp)	type of region	gene name	gene strand
+	chrIX	355514	355530	-	ATCCGTTCGCAGTGAC	2	flanking_window_reference_pA_signal	[0, 0, 0, 0, 0, 0, 0, 0, 0, 0, 0, 0, 0, 0, 0, 0, 0, 0, 0, 0, 0, 0, 0, 0, 0.232119110529, 2.78542932635, 0, 0, 0, 0, 0, 0.232119110529, 0.696357331587, 0, 0, 0.232119110529, 0, 0, 0, 0, 0, 0, 0, 0.464238221058, 0, 0.232119110529, 0.232119110529, 0, 0, 0, 0, 0, 0, 0, 0, 7.89204975798, 0, 0, 1.39271466317, 3.01754843688, 0, 0.232119110529, 3.01754843688, 3.2496675474, 0.232119110529, 0, 0, 0, 0, 0, …	0.417051	25	3UTR	YIL001W	sense
+	chrIX	375254	375270	+	CTTCGTTTAAAATGAT	1	flanking_window_reference_pA_signal	[0, 0, 0, 0, 0, 0, 0, 0, 0, 0, 0, 0, 0, 0, 0, 0, 0, 0, 0, 0, 0, 0, 0, 0, 0, 0, 0, 0, 0, 0, 0, 0, 0, 0, 0, 0, 0, 0, 0, 0, 0, 0, 0, 0, 0, 0, 0, 0, 0, 0, 0, 0, 0, 0, 0, 0.232119110529, 0, 0.928476442115, 0.232119110529, 0, 0, 0, 0, 0, 0.232119110529, 0, 0, 0, 0, 0, 0, 0, 0.464238221058, 0, 1.39271466317, 0, 0, 0, 0.696357331587, 8.35628797904, 0, 17.8731715107, 0, 0, 0, 2.55331021582]	0	51	3UTR	MSL1	sense
+	chrIX	260992	261008	+	TCACTTTACCACTAAT	2	flanking_window_reference_pA_signal	[0, 0, 0, 0, 0, 0, 0, 0, 0, 0, 0, 0, 0, 0, 0, 0, 0.928476442115, 0, 0, 0, 0.232119110529, 0.232119110529, 5.80297776322, 0, 2.32119110529, 11.6059555264, 0, 0.464238221058, 0.928476442115, 0, 0, 1.16059555264, 0, 0, 0, 0, 0, 0, 0, 0, 0, 0, 0.232119110529, 0, 0, 0, 0, 0, 0, 0, 0, 0, 0, 0, 0, 0, 0, 0, 0, 0, 0, 0, 0, 0.232119110529, 0, 0, 0, 0, 0, 0, 0, 0, 0.464238221058, 0, 0, 0.232119110529, 0, 0,…	13.7627	-5	3UTR	DFG10	sense
+	chrIX	312700	312716	+	ACTCGTTCGCAATGAC	2	flanking_window_reference_pA_signal	[0, 4.41026310005, 19.9622435055, 0, 0, 11.3738364159, 0, 0.464238221058, 0, 0.464238221058, 0.464238221058, 0.232119110529, 5.33873954216, 8.8205262001, 0, 0.696357331587, 1.6248337737, 20.194362616, 0, 6.03509687375, 0, 0, 0.232119110529, 0, 0, 0, 0, 0.464238221058, 2.78542932635, 0, 0, 0, 0, 0.232119110529, 0, 0, 0, 0, 0, 0.232119110529, 0, 0, 0.232119110529, 0.232119110529, 0, 0.232119110529,…	43.7903	-13	3UTR	TIM44	sense
-	chrX	651377	651393	-	TTACGTAACAAATGAT	0	flanking_window_reference_pA_signal	[0, 0, 0, 0, 1.85695288423, 0, 0, 0, 0.232119110529, 0, 0, 0, 0, 0, 0, 0, 0, 0, 0, 0, 0, 0.464238221058, 1.16059555264, 0, 0.464238221058, 0, 0, 0, 0, 3.01754843688, 0, 0, 0, 0, 0, 0, 0, 0, 0, 0, 0, 0, 0, 0, 0, 0, 0, 0, 0, 0, 0, 0, 0, 0, 0, 0, 0, 0, 0, 0, 0, 0, 0, 0, 0, 0, 0, 0, 0, 0, 0, 0, 0, 0, 0, 0, 0, 0, 0, 0, 0, 0, 0, 0, 0, 0]	0	27	intergenic_region	INT_0_4958	sense
+	chrX	335721	335737	-	GATCGTGCATGATGAT	1	flanking_window_reference_pA_signal	[0, 0, 0, 0, 0, 0, 0, 0, 0, 0, 0, 0, 0, 0, 0, 0, 0, 0, 0, 0, 0, 0, 0, 0, 0, 0, 0, 0, 0, 0, 0, 0, 0.928476442115, 0, 0, 0.464238221058, 0, 0, 0.232119110529, 0.232119110529, 0, 0.232119110529, 0.232119110529, 0, 0.232119110529, 1.6248337737, 3.48178665793, 0, 0, 0, 0.232119110529, 0.464238221058, 0, 0, 0, 0, 0, 0.696357331587, 0.464238221058, 0, 0.232119110529, 0, 0.928476442115, 0, 1.39271466317,…	0.417051	16	3UTR	TIM54	sense
+	chrX	54251	54267	-	CGCCGTTAATAGTGAT	1	flanking_window_reference_pA_signal	[0, 0, 0, 0, 0, 0, 0, 0, 0, 0, 0, 0, 0, 0, 0, 0, 0, 0, 0, 0, 0, 0, 0, 0, 0, 0, 0, 0, 0, 0, 0, 0, 0, 0, 0.232119110529, 1.85695288423, 0, 1.39271466317, 8.35628797904, 0, 0, 0, 0, 0, 0, 0, 0, 0, 0, 0, 0, 0, 0, 0, 0, 0, 0.232119110529, 1.39271466317, 0.232119110529, 0, 0.232119110529, 0.232119110529, 0, 0, 0, 2.32119110529, 25.0688639371, 0, 0, 0, 0, 0.232119110529, 0.696357331587, 0, 0, 0, 0, 0.23…	1.25115	36	3UTR	PRP21	sense
+	chrX	83089	83105	-	TAGCGTAATCCCGAAT	2	flanking_window_reference_pA_signal	[0, 0, 0, 0, 0, 0, 0, 0, 0, 0, 0, 0, 0, 0, 0.232119110529, 0, 0, 0, 0, 0, 0, 0, 0, 0, 0, 0, 0, 0, 0, 0, 0, 0, 0, 0, 0, 0, 1.39271466317, 0, 0, 0, 0, 0, 0, 0, 0.232119110529, 0, 0, 0, 0, 0, 0, 0, 0, 0, 0, 0, 0, 0, 0, 0, 0, 0, 0, 0, 0, 0, 0, 0, 0, 0, 0, 0, 0, 0, 0, 0, 0, 0, 0, 0, 0, 0, 0, 0, 0, 0]	0	6	intergenic_region	INT_0_4512	sense
-	chrX	407406	407422	+	TTTCGTTTAACGTGAC	1	flanking_window_reference_pA_signal	[0.232119110529, 0.232119110529, 7.89204975798, 0, 0, 0.464238221058, 0, 0.232119110529, 0, 0.696357331587, 0, 0.464238221058, 2.08907199476, 0, 1.85695288423, 0, 0.232119110529, 0, 0.232119110529, 0, 0.464238221058, 1.16059555264, 0.464238221058, 0, 0, 0.232119110529, 0.232119110529, 1.39271466317, 0, 0, 0, 0, 0, 0.232119110529, 0, 0, 0, 0, 0, 0, 0, 0, 0, 0.464238221058, 0, 0, 0, 1.6248337737, 0…	0	54	CDS	YJL015C	sense
-	chrX	345795	345811	+	TTTCATCAACATTTAT	2	flanking_window_reference_pA_signal	[0, 0, 0, 0.464238221058, 0, 0, 0, 0.928476442115, 0, 0, 0, 0, 0, 1.39271466317, 0, 0, 0, 0, 0, 0, 0, 0, 0, 0, 0, 0, 0, 0, 0.464238221058, 0, 0, 0, 0.232119110529, 0, 0, 0, 0.464238221058, 0, 0, 0, 0, 0.232119110529, 0.232119110529, 7.65993064745, 0, 2.78542932635, 223.530703439, 0, 0, 14.3913848528, 0, 0.232119110529, 2.32119110529, 13.4629084107, 0, 0.232119110529, 6.26721598428, 0, 0.232119110…	0	10	intergenic_region	INT_0_4713	sense
-	chrX	555750	555766	+	GAACGTGTAAAGTGAT	1	flanking_window_reference_pA_signal	[0, 6.49933509481, 1.85695288423, 16.7125759581, 0, 0.928476442115, 10.4453599738, 0, 0.232119110529, 0.696357331587, 11.6059555264, 0, 0.696357331587, 24.140387495, 0, 5.80297776322, 0, 0.464238221058, 0.232119110529, 15.3198612949, 0, 0, 0, 1.39271466317, 1.39271466317, 0, 0, 0, 0, 0, 0, 0, 0, 0, 0, 0, 0, 0, 0, 0, 0.232119110529, 0, 0, 0, 0.232119110529, 0, 0, 0.232119110529, 0, 0, 0, 0, 0, 0, …	0.417051	43	intergenic_region	INT_0_4878	sense
+	chrX	342319	342335	+	TCCCGTAGAACACGAT	1	flanking_window_reference_pA_signal	[0, 0, 0, 0, 0, 0, 0, 0, 0, 0, 0, 0, 0, 0, 0, 0, 0, 0, 0, 0, 0, 0, 0, 0, 0, 0, 0, 0, 0, 0, 0, 0, 0, 0, 0, 0.696357331587, 0, 0, 0, 0, 0, 0, 0, 0, 0, 0, 0, 0, 0, 0, 0, 0, 0.928476442115, 0, 0.928476442115, 12.5344319686, 0, 0, 0, 0, 0, 0, 0, 0, 0.232119110529, 0.232119110529, 0, 0.232119110529, 0, 0, 0, 0, 0, 0, 0, 0, 0, 0, 0, 0, 0, 0, 0, 0, 0, 0]	0.208525	25	3UTR	IRC8	sense
+	chrX	295037	295053	+	TCTCGTAGGGAGCGAT	1	flanking_window_reference_pA_signal	[0, 0, 0, 0, 0, 0, 0, 0, 0, 0, 0, 0, 0, 0, 0.232119110529, 0, 0, 0, 0, 0, 0, 0, 0.232119110529, 0, 0, 0, 0, 0, 0, 0, 0.464238221058, 0.232119110529, 0.232119110529, 1.6248337737, 7.19569242639, 15.3198612949, 0, 1.85695288423, 1.6248337737, 10.4453599738, 0, 0, 1.85695288423, 1.85695288423, 0, 0.464238221058, 0, 0.232119110529, 0, 0, 1.6248337737, 0.696357331587, 0, 0, 0.232119110529, 0, 0, 0, 0,…	0.625576	5	3UTR	YJL077W-A	sense
+	chrX	83886	83902	+	TTTCGTTACAAGTGAT	0	flanking_window_reference_pA_signal	[0, 0, 0, 0, 0, 0, 0, 0, 0, 0, 0, 0, 0, 0, 0, 4.17814398952, 0, 18.5695288423, 0, 0, 0, 0.928476442115, 3.71390576846, 0, 9.51688353168, 0, 0, 0, 1.85695288423, 0, 0, 0, 0, 2.78542932635, 0.464238221058, 3.01754843688, 44.334750111, 0, 4.41026310005, 0, 0, 0.928476442115, 0.696357331587, 1.39271466317, 0, 5.57085865269, 0, 0, 0, 0, 0, 0, 0.928476442115, 0.232119110529, 0, 0, 0, 0, 0, 0, 0, 0, 0, …	28.7765	6	3UTR	GON7	sense
+	chrX	323185	323201	+	TATCTTTTCATTTGAT	1	flanking_window_reference_pA_signal	[0, 0, 0, 0, 0, 0, 0, 0, 0, 0, 0.464238221058, 0, 0, 0, 0, 0, 0, 0.464238221058, 0, 0.232119110529, 0.696357331587, 0, 0.232119110529, 0, 0.696357331587, 0, 0, 0, 0, 0, 0, 0, 0, 0, 0, 0, 0, 0, 0.232119110529, 0, 0, 0, 0, 1.16059555264, 0, 3.71390576846, 0, 0, 0.464238221058, 0, 0, 0, 0, 0, 0.232119110529, 0, 0, 2.55331021582, 0, 1.39271466317, 11.1417173054, 0, 2.78542932635, 3.2496675474, 0, 0, …	8.13249	30	3UTR	NUP82	sense
-	chrII	193677	193693	-	GCCCGTGGCGCGCGAT	2	flanking_window_reference_pA_signal	[0, 0, 1.39271466317, 12.7665510791, 0, 3.01754843688, 0, 1.85695288423, 1.85695288423, 18.8016479528, 0, 1.6248337737, 4.41026310005, 13.2307893001, 0, 0, 0, 0, 0, 0, 0, 0, 0, 0, 0, 0, 0, 0, 0, 0, 0, 0, 0, 0, 0, 0, 0, 0, 0, 0, 0, 0, 0, 0, 0, 0, 0, 0, 0, 0, 0, 0, 0, 0, 0, 0, 0, 0, 0, 0, 0, 0, 0, 0, 0, 0, 0, 0, 0, 0, 0, 0, 0, 0, 0, 0, 0, 0, 0, 0, 0, 0, 0, 0, 0, 0]	0	47	intergenic_region	INT_0_341	sense
+	chrII	299983	299999	-	CGTCGTGTGACGTGAT	1	flanking_window_reference_pA_signal	[0, 0, 0, 0, 0, 0, 0, 0, 0, 0, 0, 0, 0.232119110529, 0, 0, 0, 0, 0, 0.232119110529, 0, 0, 0.696357331587, 0, 0.232119110529, 0, 0.928476442115, 4.87450132111, 0, 0, 0, 0, 0, 0.232119110529, 0, 0, 0, 0, 2.08907199476, 0, 0.232119110529, 0, 0, 0.232119110529, 0, 0, 0, 0, 0, 0.232119110529, 0, 0, 0, 0, 0, 0.696357331587, 0, 0, 0.464238221058, 0, 0, 0, 0, 0, 0, 0, 0, 0, 0, 0, 0, 0, 0, 0, 0.2321191105…	0.834102	-4	3UTR	RKM3	sense
+	chrII	342133	342149	-	TAACGTATGCCGTGAT	0	flanking_window_reference_pA_signal	[0, 0, 0, 0, 0, 0, 0, 0, 0, 0, 0, 0.232119110529, 0, 0, 0, 0, 0, 0, 0, 0, 0, 0, 0, 0, 0, 0, 0, 0, 0, 0, 0, 0, 0, 0, 0, 0, 0, 0, 0, 0, 0, 0, 0, 0, 0, 0, 0, 0, 0, 0.232119110529, 0, 0, 0, 0, 0.232119110529, 0, 0, 0, 0, 0, 0, 0.464238221058, 0.696357331587, 0.232119110529, 0, 0, 0, 0, 0, 0, 0.232119110529, 0.464238221058, 0.232119110529, 0, 0, 0, 0, 0, 0, 0, 0, 0, 0, 0, 0, 0]	0.417051	32	CUTs	CUT017	sense
+	chrII	47264	47280	-	GCCCGTTTAGAATGAT	1	flanking_window_reference_pA_signal	[0, 0, 0, 0, 0, 0, 0, 0, 0, 0, 0, 0, 0, 0, 0, 0, 0, 0, 0, 0, 0, 0, 0, 0, 0, 0, 0, 0, 0, 0, 0, 0, 0, 0, 0, 0, 0, 0.928476442115, 0, 0, 0, 0, 0, 0, 0, 0, 0, 0, 0, 0, 0, 0, 0, 0, 0, 0, 0, 0.232119110529, 0.464238221058, 0, 0, 0, 0, 0, 0, 0, 0, 0.928476442115, 0, 0, 0, 0.232119110529, 0, 0, 0, 0, 0, 0, 0, 0, 0, 0, 0, 0, 0, 0]	0.834102	7	intergenic_region	INT_0_245	sense
+	chrII	40644	40660	-	TACCGTTTCGCGTGAT	0	flanking_window_reference_pA_signal	[0, 0, 0, 0, 0, 0, 0, 0, 0, 0, 0, 0, 0, 0, 0, 0, 0, 0, 3.01754843688, 0, 0.232119110529, 0.232119110529, 1.16059555264, 0.232119110529, 0, 0, 0.232119110529, 0, 2.55331021582, 4.17814398952, 0, 0, 0.696357331587, 0, 0, 0, 0.464238221058, 0.232119110529, 0, 0, 0, 0, 0, 0, 0.232119110529, 0, 0, 0, 0, 0, 0, 0, 0, 0, 0, 0, 0, 0, 0, 0, 0, 0, 0, 0, 0, 0, 0, 0, 0, 0, 0, 0, 0, 0, 0, 0, 0, 0, 0, 0, 0, 0, …	1.6682	-1	3UTR	INT_0_234	antisense
-	chrII	561105	561121	-	TTCCGTATATGACGAT	1	flanking_window_reference_pA_signal	[0, 2.32119110529, 42.9420354478, 0, 0, 0.928476442115, 0, 0.464238221058, 1.85695288423, 0, 0, 0, 0, 0, 0, 0, 0, 0, 0, 0, 0, 0, 0, 0.232119110529, 0, 0, 0, 0, 2.08907199476, 0, 0, 0, 0, 0.928476442115, 0, 0, 0, 0, 0, 1.16059555264, 0, 0, 0, 0.232119110529, 0, 0.232119110529, 0, 0.232119110529, 0, 0.464238221058, 0, 0, 0, 1.39271466317, 0, 0, 0, 0, 0, 0, 0, 0, 0, 0, 0, 0, 0, 0, 0, 0, 0, 0, 0, 0, …	0	54	intergenic_region	INT_0_604	sense
-	chrII	301373	301389	+	GTTCGTTATGTTTAAT	2	flanking_window_reference_pA_signal	[0.696357331587, 0.232119110529, 0.232119110529, 0, 0, 3.71390576846, 5.10662043163, 113.274125938, 242.100232282, 0, 0, 6.26721598428, 111.649292164, 771.331804287, 0, 0, 0, 0, 1.85695288423, 5.10662043163, 0, 0, 0, 2.08907199476, 0, 0, 0, 0.464238221058, 0.696357331587, 0.232119110529, 2.32119110529, 4.87450132111, 16.4804568475, 25.7652212687, 0, 20.8907199476, 0, 0.232119110529, 0, 0.92847644…	3.75346	43	XUTs	XUT_2R-127	sense
+	chrII	172351	172367	+	TTACGTATTAAATGAC	1	flanking_window_reference_pA_signal	[0, 0, 0, 0, 0, 0, 0, 0, 0, 0, 0, 0.232119110529, 0, 0, 0, 0, 0, 0, 0, 0, 0, 0, 0, 0, 0, 0, 0, 0.232119110529, 0, 0, 0, 0.232119110529, 0, 0, 0, 0, 0, 0.232119110529, 0, 0, 0, 0, 0, 0, 0, 0, 0, 0, 0, 0, 0, 0, 0, 0, 0.232119110529, 0, 0.464238221058, 18.1052906213, 0.232119110529, 0, 0, 0, 0, 0, 3.2496675474, 0, 0, 2.08907199476, 0, 0, 0.232119110529, 0, 0, 0, 0, 0, 0, 0, 0, 0, 0, 0, 0, 0, 0, 0]	0.625576	27	3UTR	RRN10	sense
+	chrVI	123194	123210	-	TGACGTTATTAATATT	2	flanking_window_reference_pA_signal	[0, 0, 0, 0, 0, 0, 0, 0, 0, 0, 0, 0, 0, 0, 0, 0, 0, 0, 0, 0, 0, 0, 0.232119110529, 0.232119110529, 0, 0, 0.928476442115, 0, 0, 1.6248337737, 0, 0, 1.16059555264, 0, 1.85695288423, 12.5344319686, 0, 0, 13.6950275212, 0, 0, 0.232119110529, 0.232119110529, 0.928476442115, 6.26721598428, 0, 0, 0, 0, 0, 0, 0, 0.696357331587, 0.464238221058, 2.55331021582, 0, 0, 0, 0, 0, 1.16059555264, 0, 0, 0.23211911…	1.6682	8	3UTR	SMC1	sense
+	chrVI	164890	164906	-	TTACGTAAAAAGTGAT	0	flanking_window_reference_pA_signal	[0, 0, 0, 0, 0, 0, 0, 0, 0, 0, 0, 0, 0, 0, 0, 0, 0, 0, 0, 0, 0, 0, 0, 0.232119110529, 0, 0, 0, 0, 0, 0, 0, 0, 0, 0, 0, 0, 0, 0, 0, 0, 0, 0, 0, 0, 0, 0, 0, 0, 0, 0, 0, 0, 0, 0, 0, 0, 0, 0, 0.232119110529, 0, 0, 0, 0, 1.85695288423, 0, 0, 0, 0, 0, 0, 0.232119110529, 0, 0, 0, 0, 0, 0.928476442115, 6.73145420534, 0, 0.232119110529, 0, 0, 3.01754843688, 0, 0, 0.232119110529]	0.208525	47	3UTR	YFR009W-A	sense
+	chrI	62658	62674	-	TATCGTACAATATGAT	0	flanking_window_reference_pA_signal	[0, 0, 0, 0, 0, 0, 0, 0, 0, 0.464238221058, 0, 1.6248337737, 0, 0.928476442115, 21.1228390581, 0, 4.87450132111, 42.2456781163, 0, 0.232119110529, 0.464238221058, 3.2496675474, 10.6774790843, 35.978462132, 0, 26.4615786003, 0, 0, 0, 0.928476442115, 0, 0.232119110529, 3.01754843688, 0, 0.232119110529, 0, 0, 0, 0, 0.232119110529, 0, 0, 2.55331021582, 0, 6.26721598428, 0, 0, 0, 0, 0.232119110529, 0,…	96.1302	-13	3UTR	ERV46	sense
+	chrI	132086	132102	+	AATCGTGTTAGATGAT	1	flanking_window_reference_pA_signal	[0, 0, 0, 0, 0, 0, 0, 0, 0, 0, 0, 0, 0, 3.01754843688, 0, 0, 8.58840708957, 0, 5.10662043163, 0, 0.464238221058, 2.08907199476, 1.85695288423, 0.696357331587, 32.032437253, 419.903470947, 0, 0, 1.6248337737, 52.226799869, 0, 0, 0.464238221058, 0.232119110529, 0, 0, 0, 1.16059555264, 8.58840708957, 0, 0.928476442115, 0, 1.39271466317, 4.87450132111, 0, 0, 0.232119110529, 3.01754843688, 0, 0, 0, 0,…	29.1936	-5	3UTR	CYS3	sense
-	chrXV	77376	77392	-	TTACGAAAATGGTCAT	2	flanking_window_reference_pA_signal	[0, 0.464238221058, 16.0162186265, 0, 0, 0.464238221058, 8.35628797904, 0, 0, 0, 0, 1.16059555264, 3.2496675474, 0, 25.7652212687, 0, 0.696357331587, 0, 2.32119110529, 0, 0, 6.26721598428, 0, 0.232119110529, 0.928476442115, 0, 0.232119110529, 0, 0, 0, 0, 0, 0, 0, 0, 0, 0, 0, 0, 0, 0, 0, 0, 0, 0, 0, 0, 0, 0, 0, 0, 0, 0, 0, 0, 0, 0, 0, 0, 0, 0, 0, 0, 0, 0, 0, 0, 0, 0, 0, 0, 0, 0, 0, 0, 0, 0.2321191…	0	42	intergenic_region	INT_0_7618	sense
-	chrXV	256219	256235	-	GATCGTATTAAATGAT	1	flanking_window_reference_pA_signal	[0.928476442115, 0, 2.32119110529, 0, 0, 0, 3.71390576846, 0, 0, 0.232119110529, 0, 0.928476442115, 0, 0.232119110529, 0, 0, 0, 0, 0, 0, 0, 0, 0.696357331587, 0, 0, 0, 0.232119110529, 0, 0, 0, 0.232119110529, 0, 0.696357331587, 0, 0, 0, 0.464238221058, 0.928476442115, 0, 0.232119110529, 0, 0, 9.05264531063, 0, 0, 1.39271466317, 10.6774790843, 0, 0, 1.16059555264, 0, 0.232119110529, 0.696357331587…	0	10	intergenic_region	INT_0_7758	sense
+	chrXV	408262	408278	-	CAACGTCTGTGATGAC	2	flanking_window_reference_pA_signal	[0, 0, 0, 0, 0, 0, 0, 0, 0, 0, 0, 0, 0, 0, 0, 0, 0, 0, 0, 0, 0, 0.928476442115, 2.55331021582, 0, 0, 0.232119110529, 4.87450132111, 0, 0, 0.464238221058, 1.85695288423, 3.71390576846, 27.1579359319, 0, 0.464238221058, 14.1592657423, 0, 2.78542932635, 0, 0.232119110529, 0, 0, 0, 0, 0, 0.232119110529, 0, 0, 0, 0, 0, 0, 0, 0, 0, 0, 0, 0, 0, 0, 0.232119110529, 0, 0, 0, 0, 0.464238221058, 0, 0, 0, 0, …	1.25115	2	3UTR	GLO4	sense
-	chrXV	722727	722743	-	ACACGTATAGAATGAT	1	flanking_window_reference_pA_signal	[1.16059555264, 3.2496675474, 0, 3.71390576846, 0, 0.696357331587, 4.17814398952, 0, 0, 0, 0, 0, 0.464238221058, 0, 0, 0, 0, 0, 0, 0.232119110529, 0, 0.464238221058, 0, 0, 0, 0, 0.232119110529, 0.696357331587, 0, 0, 0, 0, 0, 0, 0, 0, 0, 0, 0.232119110529, 0.232119110529, 0, 0, 0.232119110529, 0, 0, 0, 0, 0, 0, 0, 0, 0, 0, 0, 0, 0, 0.464238221058, 0, 0, 0, 0.464238221058, 0, 0.232119110529, 0, 0, …	0.208525	50	antisense_CDS	INT_0_8122	sense
-	chrXV	259749	259765	+	GACCGTTCAGGATGAC	2	flanking_window_reference_pA_signal	[0, 0, 0, 0, 0.232119110529, 0, 0, 0, 0, 0, 0, 0, 0, 0, 0.232119110529, 0, 0, 0.232119110529, 0, 0, 0, 0.232119110529, 0, 0, 0, 0, 0, 0, 0, 0, 0.232119110529, 0, 0, 0, 0, 0, 0, 0, 0.232119110529, 0, 0, 0, 0, 0, 0, 0, 0, 0, 0, 0, 0, 0, 0, 0, 0, 0, 0, 0, 0, 0, 0, 0, 0, 0, 0, 0, 0, 0, 0, 0, 0, 0, 0, 0, 0, 0, 0, 0, 0, 0, 0, 0, 0, 0, 0, 0]	0.208525	52	intergenic_region	INT_0_7761	sense
-	chrXV	874292	874308	+	TCACGTAGAGCATGAC	1	flanking_window_reference_pA_signal	[4.64238221058, 16.248337737, 0, 0.232119110529, 0, 0.928476442115, 1.6248337737, 1.39271466317, 0, 0, 0, 0, 0, 0, 0, 0, 0, 0, 0.232119110529, 0, 0, 0, 0, 0, 0, 0, 0, 0, 0, 0, 0, 0, 0, 0, 0, 0, 0, 0.232119110529, 0, 0, 0, 0, 0, 0, 0, 0.232119110529, 0, 0, 0, 0, 0, 0, 0, 0, 0, 0, 0, 0, 0, 0, 0, 0, 0, 0, 0, 0, 0, 0, 0, 0, 0, 0, 0, 0, 0, 0, 0, 0, 0, 0, 0, 0, 0, 0, 0, 0]	0.625576	55	3UTR	INT_0_8235	sense
-	chrXV	774345	774361	+	ATACGTATTCAGTGAT	1	flanking_window_reference_pA_signal	[0, 0, 0, 0, 0, 0.464238221058, 0, 0, 0.696357331587, 0, 0, 0.928476442115, 17.8731715107, 0, 0, 0.232119110529, 0, 0.464238221058, 0.696357331587, 0.696357331587, 12.9986701896, 0, 0.464238221058, 0, 0, 0, 0, 0, 0, 0, 0.232119110529, 0.696357331587, 3.01754843688, 0, 0, 0, 0, 0, 0.232119110529, 0.232119110529, 0, 0.232119110529, 0, 0, 0.232119110529, 0, 0, 0, 0, 0.232119110529, 0, 0, 0, 0, 0, 0,…	0	44	intergenic_region	INT_0_8157	sense
+	chrXV	144033	144049	+	TATGGTCATTTTTGCT	2	flanking_window_reference_pA_signal	[0, 0, 0, 0, 0, 0, 0, 0, 0, 0, 0, 0, 0, 0, 0, 0, 0, 0, 0, 0, 0, 0, 0, 0, 0, 0, 0, 0, 0, 0, 0, 0, 0, 0, 0, 0, 0.232119110529, 0, 0, 0, 0, 0, 0, 0, 0, 0, 0.232119110529, 0.464238221058, 2.78542932635, 0, 0, 0, 0, 0, 0, 0, 0, 0, 0, 0, 2.08907199476, 0, 0, 0, 0, 0.232119110529, 4.87450132111, 0, 0, 0, 0, 0, 0.464238221058, 0, 0, 0, 0, 0.464238221058, 0, 0, 0, 0, 0, 0, 0.232119110529, 2.08907199476]	0.208525	36	3UTR	TRM10	sense
+	chrXV	533865	533881	+	GCCCGTGCCCCGCGAT	2	flanking_window_reference_pA_signal	[0, 0, 0, 0, 0, 0, 2.55331021582, 16.4804568475, 0, 0, 0.696357331587, 0.464238221058, 0, 1.16059555264, 6.49933509481, 0, 0, 0.232119110529, 0.232119110529, 0, 29.0148888161, 0, 0, 0, 6.26721598428, 0, 0.696357331587, 11.838074637, 0, 0, 0.232119110529, 0, 0, 0, 0, 0.464238221058, 0.696357331587, 0.464238221058, 0, 0.464238221058, 0, 0, 0.696357331587, 1.16059555264, 0, 0, 0, 0, 0, 0, 0, 0, 0, 0…	63.3917	-10	3UTR	CEX1	sense
+	chrXV	99575	99591	+	TTTCGTTTATAGTGAT	0	flanking_window_reference_pA_signal	[0, 0, 0, 0, 0, 0, 0, 0, 0, 0, 0, 0, 0, 0, 0, 0, 0, 0, 0, 0, 0, 0, 0, 0, 0, 0, 0, 0, 0, 0, 0, 0, 0.232119110529, 0.696357331587, 0, 0, 0.232119110529, 2.78542932635, 0, 0.464238221058, 0, 0.232119110529, 0.232119110529, 0.464238221058, 0, 0.232119110529, 0.232119110529, 0.232119110529, 0, 0, 0.232119110529, 0, 0, 0, 0, 0, 0, 0, 0, 0, 0, 0, 0, 0, 0, 0, 0, 0, 0, 0, 0, 0, 0, 0, 0, 0, 0, 0, 0, 0, 0, …	0.208525	7	3UTR	MSN1	sense
+	chrXV	481812	481828	+	TGGCGTGGTTTCTTTT	2	flanking_window_reference_pA_signal	[0, 0, 0, 0, 0.696357331587, 0, 0, 0, 0, 0, 0, 0, 0, 0, 0, 0, 1.85695288423, 13.2307893001, 0, 0, 0, 2.32119110529, 4.64238221058, 0, 0, 0.464238221058, 3.48178665793, 4.41026310005, 0, 1.85695288423, 0, 0.232119110529, 0.464238221058, 0, 0, 0, 0.464238221058, 0.232119110529, 0, 0, 0.464238221058, 0.232119110529, 0, 0, 0, 0, 0.232119110529, 0.464238221058, 0, 0, 0, 0, 0, 0, 0, 0, 0, 0, 0, 0, 0, 0…	33.9896	-13	3UTR	LPX1	sense
+	chrXV	380819	380835	+	ATTCGTGTAGTATGAT	1	flanking_window_reference_pA_signal	[0, 0, 0, 0, 0, 0, 0, 0, 0, 0, 0, 0, 0, 0, 0, 0, 0, 0, 0, 0, 0, 0, 0, 0, 0, 0, 0.232119110529, 0, 0, 0, 0, 0, 0, 0, 0, 0, 0, 0, 0, 0, 0, 0, 0, 0, 0, 0, 0, 0, 0, 0, 0, 0, 0, 0, 0, 0, 0, 0, 0, 0, 0, 0, 0, 0, 0, 0, 0, 0, 0, 0, 0, 0, 0, 0, 0.232119110529, 0, 0, 0.232119110529, 0.232119110529, 0, 0.232119110529, 0, 0, 0, 0, 0]	0.208525	-4	CDS	BUB3	sense
-	chrXIV	228946	228962	-	ATACGTAAAGGATGAT	1	flanking_window_reference_pA_signal	[0.696357331587, 0, 0, 0, 0, 0, 0.232119110529, 0.464238221058, 0, 0, 0.464238221058, 3.48178665793, 0, 0, 0.232119110529, 5.33873954216, 0, 0.232119110529, 0, 0, 0.696357331587, 0.232119110529, 0, 0, 0.232119110529, 0.232119110529, 0, 0.232119110529, 0.464238221058, 0, 1.39271466317, 0, 0, 0, 0.464238221058, 0, 0, 0, 0, 0, 0, 0, 0, 0, 0, 0, 0, 0, 0, 0, 0, 0, 0, 0, 0, 0, 0, 0, 0, 0, 0, 0, 0, 0, 0…	0	41	intergenic_region	INT_0_7123	sense
-	chrXIV	140632	140648	-	TATCGTGAATAATGAC	1	flanking_window_reference_pA_signal	[0.696357331587, 0.232119110529, 0, 0.232119110529, 0, 1.39271466317, 28.086412374, 0, 0.696357331587, 0.928476442115, 1.85695288423, 0, 0.464238221058, 16.4804568475, 0, 0, 0.928476442115, 5.80297776322, 0, 0, 0, 0.232119110529, 0.232119110529, 0, 0, 0, 0.232119110529, 0, 0, 0, 0, 0, 0, 0, 0, 0, 0, 0, 0, 0, 0, 0, 0, 0, 0, 0, 0, 0, 0.464238221058, 0.928476442115, 0, 0.464238221058, 4.17814398952,…	0	50	intergenic_region	INT_0_7064	sense
-	chrXIV	37536	37552	-	GATCGTTGCGGGTAAT	2	flanking_window_reference_pA_signal	[0, 0, 0, 0, 0.232119110529, 0, 0, 0.232119110529, 0, 0, 0, 0, 0, 0, 0, 0, 0, 0, 0.464238221058, 0.464238221058, 0, 0, 0, 0, 0, 0, 0, 0, 0, 0.232119110529, 0, 0, 0, 0, 0, 0, 0, 0.232119110529, 0.696357331587, 0, 0, 0, 0, 0, 0, 0, 0.232119110529, 1.85695288423, 8.58840708957, 0, 0, 0.696357331587, 2.55331021582, 0, 0.232119110529, 8.35628797904, 0, 1.6248337737, 16.9446950686, 0, 0, 0, 0, 0.232119…	0	-2	intergenic_region	INT_0_6992	sense
-	chrXIV	493170	493186	-	CACCGTTTGACGTGAT	1	flanking_window_reference_pA_signal	[45.9595838847, 0, 0, 0, 0, 0, 0, 0, 0, 0, 0, 0, 0, 0, 0, 0, 0, 4.87450132111, 0, 1.16059555264, 0.464238221058, 0, 0.464238221058, 4.64238221058, 0, 0, 0, 0, 0, 0, 0, 0, 0, 0, 0, 0, 0, 0, 0, 0, 0, 0, 0, 0, 0, 0, 0, 0, 0, 0, 0, 0, 0, 0, 0, 0, 0, 0, 0.232119110529, 0, 0, 0, 0, 0, 0, 0, 0, 0, 0, 0, 0, 0, 0.232119110529, 0, 0, 0, 0.464238221058, 0, 0, 0, 0, 0, 0, 0, 0, 0]	0	56	XUTs	INT_0_7326	sense
+	chrXIV	707644	707660	-	TTTCGTATGAGATGAT	0	flanking_window_reference_pA_signal	[0, 0, 0, 0, 0, 0, 0, 0, 0, 0, 0, 0, 0, 0, 0, 0, 0, 0, 0, 0, 0, 0, 0, 0, 0, 0, 0, 0, 0, 0, 0, 0, 0.232119110529, 0, 0, 0, 0, 5.10662043163, 0, 1.85695288423, 0, 0.928476442115, 6.26721598428, 0, 0, 0, 0, 0, 0, 0, 0, 0, 0, 0, 0, 0, 0, 0, 0, 0, 0, 0, 0, 0, 0, 0, 0, 0, 0, 0, 0, 0, 0, 0, 0, 0, 0, 0.464238221058, 0, 0, 0, 0, 0.232119110529, 0, 0, 0]	0	12	3UTR	PET494	sense
-	chrXIV	378598	378614	+	AATCGTGTCGAGCGAT	2	flanking_window_reference_pA_signal	[0, 0.464238221058, 0, 0, 0, 0.232119110529, 0, 3.48178665793, 0, 0, 0, 0, 0.464238221058, 0, 0, 0.464238221058, 0, 0.232119110529, 8.35628797904, 41.3172016741, 0, 0, 0.696357331587, 0.464238221058, 0, 1.85695288423, 22.7476728318, 0, 0.232119110529, 0, 0.928476442115, 0, 0, 0.232119110529, 0.696357331587, 0, 0, 0, 0.232119110529, 2.08907199476, 0, 0, 0, 0, 0, 0, 0, 0, 0, 0, 0, 0, 0.232119110529…	0.208525	37	intergenic_region	INT_0_7241	sense
+	chrXIV	283727	283743	+	CTTCGTCTAGAATGAT	1	flanking_window_reference_pA_signal	[0, 0, 0, 0, 0, 0, 0, 0, 0, 0, 0, 0, 0, 0, 0, 0, 0, 0, 0, 0, 0, 0, 0, 0, 0, 0, 0, 0, 0, 0, 0, 0, 0, 0, 0, 0, 0, 0, 0, 0, 0, 0, 0, 0, 0, 0, 0, 0, 0, 0, 0, 0, 0, 0, 0, 0, 0, 0, 0, 0, 0, 0, 0, 0, 0, 0, 0, 0, 0, 0, 0, 0.232119110529, 0.232119110529, 0.928476442115, 0, 0, 0, 0, 0, 0, 0, 0.464238221058, 1.85695288423, 0, 0.928476442115, 3.01754843688]	0.834102	55	intergenic_region	INT_0_7165	sense
-	chrXIV	466721	466737	+	TACCGTGAGAAACGAT	1	flanking_window_reference_pA_signal	[0.464238221058, 0, 0, 0, 0.928476442115, 0, 0, 0, 0, 0.232119110529, 0.232119110529, 0, 0, 0, 0, 0, 0, 0, 0, 0, 0, 0, 0, 0, 0, 0, 0, 0, 0.928476442115, 0, 0, 0, 0.696357331587, 0, 2.32119110529, 0, 0, 0, 0, 0, 0, 0, 0, 0, 0, 0, 0, 0, 1.6248337737, 0, 0, 0, 0.464238221058, 0.232119110529, 0, 0, 0, 0.696357331587, 0, 0, 0, 0.464238221058, 0, 0, 0.464238221058, 0, 0, 0, 0, 0, 0, 0, 0, 0, 0, 0, 0, 0…	0	22	intergenic_region	INT_0_7306	sense
+	chrXIV	366597	366613	+	TATCGTTTAAAATGAT	0	flanking_window_reference_pA_signal	[0, 0, 0, 0, 0, 0, 0, 0, 0, 0, 0, 0, 0, 0, 0, 0, 0, 0, 0, 0.232119110529, 0, 0.464238221058, 0, 0.696357331587, 0, 0, 0, 0.232119110529, 0.464238221058, 0, 0, 0, 0, 0, 0, 0, 0.232119110529, 0.464238221058, 0, 0, 0, 0, 0, 0, 0, 0, 1.39271466317, 0.928476442115, 0, 0.696357331587, 0, 0, 0, 0, 0.232119110529, 0.464238221058, 0.232119110529, 1.16059555264, 0.232119110529, 1.16059555264, 3.48178665793…	1.45968	31	3UTR	YSF3	sense
+	chrXIV	556876	556892	+	TGTTGTATTATATCAT	2	flanking_window_reference_pA_signal	[0, 0, 0, 0, 0, 0, 0, 0, 0, 0, 0, 0, 0, 0, 0, 0, 0, 0, 0, 0, 0, 0, 0, 0, 0, 0, 0, 0, 0, 0, 0, 0, 0, 0, 0.232119110529, 1.16059555264, 0, 6.96357331587, 79.3847358009, 0, 3.2496675474, 0, 0.696357331587, 4.87450132111, 0, 0.232119110529, 0, 0, 0, 0.464238221058, 0, 0, 0, 0, 0, 0, 0, 0.232119110529, 0.464238221058, 0, 0, 0, 0, 0, 0, 0, 0, 0, 0, 0, 0, 0, 0.232119110529, 0, 0, 0, 0, 0, 0, 0, 0, 0, 0,…	0.208525	8	3UTR	BDP1	sense
-	chrXIV	545073	545089	+	TTCTGTGTCGTGCGAT	2	flanking_window_reference_pA_signal	[0.232119110529, 0.232119110529, 0, 0, 1.16059555264, 8.12416886851, 0, 0, 0, 0.696357331587, 8.8205262001, 36.442700353, 0, 2.32119110529, 0, 0.696357331587, 4.17814398952, 0, 0, 0, 0, 0, 0, 0.232119110529, 0.232119110529, 0.928476442115, 0, 0, 0, 0.232119110529, 0, 0, 0, 0, 0, 0, 0, 0, 0, 0, 0, 0, 0.232119110529, 0, 0, 0, 0, 0, 0, 0, 0, 0, 0, 0, 0, 0, 0, 0, 0, 0, 0, 0, 0, 0, 0, 0, 0, 0, 0, 0, 0…	0	45	3UTR	INT_0_7367	sense
-	chrXIV	394498	394514	+	CAGCGTGTGACATGAT	1	flanking_window_reference_pA_signal	[0, 0, 0.928476442115, 0, 0, 0.464238221058, 0, 0, 0, 0, 0.232119110529, 0, 0, 0, 0, 0, 1.85695288423, 0, 0.696357331587, 0.464238221058, 0, 0, 0, 0, 0, 0.232119110529, 0, 0, 0, 0, 0, 0, 0, 0, 0, 0, 0, 0, 0, 0, 0, 0, 0, 0, 0, 0, 0, 0, 0, 0, 0, 0, 0, 0.232119110529, 0, 2.08907199476, 0, 0, 0, 0, 0, 0, 0, 0.232119110529, 0, 0, 0, 0, 0, 0, 0, 0.232119110529, 0, 0, 0, 0, 0, 0, 0, 0, 0, 0, 0, 0, 0, 0]	0.208525	1	intergenic_region	INT_0_7253	sense
-	chrXIV	500549	500565	+	ATACGTTACAAATGAT	1	flanking_window_reference_pA_signal	[0, 0, 0, 1.16059555264, 0, 0, 0, 0, 0, 0, 0, 0, 0, 0, 0, 0, 0, 0, 0, 0, 0, 0, 0, 0, 0, 0, 0, 0.232119110529, 0, 0, 0, 0, 0, 0, 0, 0, 0, 0, 1.85695288423, 0, 0, 3.71390576846, 0, 0.696357331587, 0.696357331587, 1.39271466317, 8.58840708957, 0, 4.17814398952, 0, 0, 0, 2.55331021582, 3.94602487899, 0, 0.232119110529, 0.232119110529, 0.464238221058, 1.6248337737, 7.42781153692, 0.232119110529, 0, 1.…	0	10	intergenic_region	INT_0_7332	sense
+	chrXIV	255103	255119	+	TGTCGTAACAAATGAC	1	flanking_window_reference_pA_signal	[0, 0, 0, 0, 0, 0, 0, 0, 0, 0, 0, 0, 0, 0, 0, 0, 0, 0, 0, 0, 0, 0, 1.6248337737, 0, 0.464238221058, 4.64238221058, 0, 0.696357331587, 2.55331021582, 0, 0, 0.232119110529, 1.16059555264, 0.928476442115, 38.0675341267, 194.980052844, 0, 0, 226.084013655, 0, 0, 0, 12.5344319686, 28.3185314845, 0, 0, 2.78542932635, 12.0701937475, 0, 0, 0.232119110529, 0, 0, 0, 0, 0, 0, 0, 0, 8.8205262001, 0, 0, 0, 0,…	2.50231	8	3UTR	YNL208W	sense
-	chrXIV	708364	708380	+	TCCCGTCGCGCGTGAT	0	flanking_window_reference_pA_signal	[0, 0, 0.696357331587, 0, 0, 3.48178665793, 3.01754843688, 0, 1.16059555264, 0, 0.464238221058, 22.0513155002, 87.2767855588, 0, 0, 0.232119110529, 0.928476442115, 6.73145420534, 0, 1.16059555264, 1.6248337737, 0, 1.39271466317, 0, 0.464238221058, 0.232119110529, 0.232119110529, 0, 0.928476442115, 1.16059555264, 0, 0.232119110529, 0, 0.464238221058, 0.464238221058, 0, 0.232119110529, 0, 0, 0, 0, …	0.625576	44	intergenic_region	INT_0_7498	sense
-	chrXIII	527610	527626	-	TAATGTTTTGAATTAT	2	flanking_window_reference_pA_signal	[0.928476442115, 15.784099516, 1.39271466317, 0, 0.928476442115, 35.978462132, 0, 0, 0, 23.9082683845, 0, 0, 0, 0, 0.928476442115, 1.39271466317, 0, 0, 0, 0.464238221058, 0, 0, 1.16059555264, 19.9622435055, 0, 0, 0.232119110529, 0.464238221058, 1.6248337737, 4.41026310005, 0, 0, 0, 0, 0.232119110529, 0.464238221058, 0, 0, 0, 0.232119110529, 0, 0.696357331587, 0, 0, 0, 0, 2.55331021582, 0, 0, 0, 0…	0	51	intergenic_region	INT_0_6664	sense
+	chrXIII	517351	517367	-	CTACGTGTAAAGTGAT	1	flanking_window_reference_pA_signal	[0, 0, 0, 0, 0, 0, 0, 0, 0, 0, 0, 0, 0, 0, 0, 0, 0, 0, 0, 0, 0.232119110529, 0, 0, 0.696357331587, 0.696357331587, 0, 6.26721598428, 0, 0, 0, 0, 0, 0.232119110529, 0, 0, 0, 0, 0.232119110529, 0, 0, 0, 0, 1.85695288423, 0, 0, 14.1592657423, 0, 0, 0, 0, 0, 0, 3.48178665793, 0.232119110529, 0, 0, 0, 0, 3.2496675474, 0, 0, 0, 0, 0.464238221058, 0, 0, 0, 0, 0, 0, 0, 0, 0, 0, 0, 0, 0, 0, 0, 0, 0, 0, 0,…	1.87673	15	3UTR	YMR124W	sense
+	chrXIII	135315	135331	-	AATCGTTCTTCGCGAT	2	flanking_window_reference_pA_signal	[0, 0, 0, 0, 0, 0, 0, 0, 0, 0, 0.464238221058, 7.89204975798, 12.0701937475, 29.4791270372, 0, 0.464238221058, 2.08907199476, 19.9622435055, 0, 0.232119110529, 0.696357331587, 0, 0.696357331587, 4.41026310005, 0, 0.232119110529, 0.696357331587, 0, 0, 0, 0, 0, 0, 0, 0, 0, 0, 0, 0, 0, 0, 0, 0, 0, 0, 0, 0, 0, 0, 0, 0, 0, 0, 0, 0, 0, 0, 0, 0, 0, 0, 0, 0, 0, 0, 0, 0, 0, 0, 0, 0, 0, 0, 0, 0, 0, 0, 0, 0…	83.4102	-17	3UTR	DAK1	sense
-	chrXIII	668328	668344	-	CGTCGTCGTAGGTGAT	1	flanking_window_reference_pA_signal	[13.6950275212, 0, 0.928476442115, 9.05264531063, 0, 1.6248337737, 7.89204975798, 0, 2.08907199476, 9.05264531063, 0, 0.232119110529, 0.464238221058, 1.85695288423, 0, 0, 0.696357331587, 1.6248337737, 0.232119110529, 0, 3.2496675474, 0, 2.32119110529, 0, 1.85695288423, 3.01754843688, 0.696357331587, 0.232119110529, 0.232119110529, 0, 0.232119110529, 0, 0, 0, 0.232119110529, 0, 0, 0, 0, 0.23211911…	0	56	intergenic_region	INT_0_6783	sense
+	chrXIII	820028	820044	-	TGATGATATTATTGAT	2	flanking_window_reference_pA_signal	[0, 0, 0, 0, 0, 0, 0, 0, 0, 0, 0, 0, 0, 0, 0, 0, 0, 0, 0, 0, 0, 0, 0, 0, 0, 0, 0, 0, 0, 1.39271466317, 0, 0, 0.928476442115, 0, 0, 0, 0, 0, 0, 0, 0, 0.464238221058, 0, 0, 5.57085865269, 0, 25.9973403792, 0, 0, 19.2658861739, 0, 0.464238221058, 1.16059555264, 8.35628797904, 4.41026310005, 37.8354150162, 0, 4.87450132111, 0, 0.464238221058, 0, 0, 0, 1.39271466317, 0, 1.6248337737, 0, 0, 0, 0, 0.232…	0	25	3UTR	DSK2	sense
+	chrXIII	233290	233306	+	TTACTTATTTATTCAT	2	flanking_window_reference_pA_signal	[0, 0, 0, 0, 0, 0, 0, 0, 0, 0, 0, 0, 0, 0, 0, 0, 0, 0, 0, 0, 0, 0, 0, 0.696357331587, 0, 0, 0.232119110529, 3.48178665793, 0, 0, 0.464238221058, 0.696357331587, 0, 0.232119110529, 0.232119110529, 0.696357331587, 0, 0, 0, 0.232119110529, 0, 0, 0, 0.464238221058, 0, 0, 0, 0.232119110529, 0, 0, 0.232119110529, 3.48178665793, 0, 0, 0, 0.464238221058, 4.41026310005, 0, 0, 0.232119110529, 0, 0.92847644…	2.08525	32	3UTR	YML020W	sense
-	chrXIII	712207	712223	+	TAACGTCATGTCGAAT	2	flanking_window_reference_pA_signal	[0.464238221058, 2.55331021582, 0, 0.232119110529, 0, 0, 0, 0, 0, 0, 0, 0, 0, 0, 0, 0, 0, 0, 0, 0, 0, 0, 0, 0, 0, 0.232119110529, 0, 0, 0, 5.80297776322, 0, 0, 0.232119110529, 0, 0.232119110529, 0, 0, 0, 0, 0, 0, 0, 0, 0, 0, 0, 0, 0, 0, 0, 0, 0, 0, 0, 0, 0, 0, 0, 0, 0, 0, 0, 0, 0, 0, 0, 0, 0, 0, 0, 0, 0, 0, 0, 0, 0, 0, 0, 0, 0, 0, 0, 0, 0, 0, 0]	0	27	intergenic_region	INT_0_6803	sense
+	chrXIII	82920	82936	+	CAACGTAATTTTTTAT	2	flanking_window_reference_pA_signal	[0, 0, 0, 0, 0, 0, 0, 0, 0, 0, 0, 0, 0, 0, 0, 0, 0, 0, 0, 0, 0, 0, 0, 0, 0, 0, 0, 0, 0, 0, 0.232119110529, 0, 0, 0, 0.232119110529, 1.6248337737, 0, 0, 0, 0, 0, 0, 0.232119110529, 1.39271466317, 0, 0, 0.464238221058, 12.302312858, 0, 0.232119110529, 1.16059555264, 1.6248337737, 2.55331021582, 48.28077499, 0, 0.464238221058, 0, 0, 0, 0.232119110529, 3.01754843688, 0, 0.464238221058, 0, 0, 0, 0.232…	0	23	3UTR	GIM5	sense
-	chrXIII	284711	284727	+	CCCCGTCAAGAATGAT	1	flanking_window_reference_pA_signal	[0, 0, 3.01754843688, 16.4804568475, 0, 0.232119110529, 0, 0.232119110529, 0.696357331587, 0, 0, 1.16059555264, 0, 0.232119110529, 0, 0, 0.232119110529, 0, 0, 0.928476442115, 0, 0, 0, 0, 0, 0, 0, 0, 0, 0, 0, 0, 0, 0, 0, 0, 0, 0, 0, 0.232119110529, 2.32119110529, 0, 0, 0.232119110529, 0, 0, 0.232119110529, 0, 0, 11.6059555264, 0, 0, 0.464238221058, 0.696357331587, 0, 0, 0, 0, 0, 0.464238221058, 0,…	0	53	intergenic_region	INT_0_6476	sense
-	chrXIII	743543	743559	+	AGTCGTGTATCGTGAT	1	flanking_window_reference_pA_signal	[8.58840708957, 0, 2.78542932635, 0, 0, 0, 0, 0, 0, 0.464238221058, 0, 0, 0, 0, 0, 0, 0, 0.464238221058, 0, 0, 0, 0, 0.232119110529, 0, 0, 0, 1.6248337737, 10.6774790843, 0, 0, 0, 0.696357331587, 0, 0, 0, 0, 0.232119110529, 0.464238221058, 1.85695288423, 16.7125759581, 0, 0, 0, 0.464238221058, 0.928476442115, 0.696357331587, 0.464238221058, 0.928476442115, 0, 0.232119110529, 0, 6.73145420534, 27.…	0	4	intergenic_region	INT_0_6826	sense
-	chrIV	861617	861633	-	TCCCGTAAGACGTGAT	0	flanking_window_reference_pA_signal	[5.80297776322, 0, 0, 0, 0, 0.464238221058, 0.232119110529, 0, 0, 0, 0, 0, 0, 0, 0.464238221058, 1.16059555264, 0, 0, 0.232119110529, 1.39271466317, 0, 0, 0, 0.232119110529, 0, 0, 0, 0.232119110529, 0, 0.232119110529, 0.232119110529, 0.232119110529, 0, 0.696357331587, 0.464238221058, 0, 0, 0, 1.6248337737, 3.2496675474, 0, 0, 4.41026310005, 0, 0, 0, 0, 0, 0, 0.464238221058, 0, 0, 0, 0, 0, 0, 0, 0…	0	56	intergenic_region	INT_0_1688	sense
+	chrIV	1129418	1129434	-	TCGTGTTATAAGTGCT	2	flanking_window_reference_pA_signal	[0, 0, 0, 0, 0, 0, 0, 0, 0, 0, 0, 0, 0, 0, 0, 0, 0, 0, 0, 0, 0, 0, 0, 0, 0, 0, 0, 0, 0, 0, 0, 0, 0, 0, 0, 0, 0, 0, 0, 0, 0, 0, 0, 0, 0, 0, 0, 0, 0, 0, 0, 0, 0, 0, 0, 0, 0, 0, 2.08907199476, 0, 0.696357331587, 0, 0, 0.232119110529, 1.39271466317, 8.58840708957, 0, 0.232119110529, 0, 0, 0, 1.39271466317, 0, 0, 0, 0, 0, 0, 0, 0, 0, 0, 0.232119110529, 0, 0, 0.232119110529]	0	35	3UTR	UBX5	sense
-	chrIV	372073	372089	-	TGTCATCATATATAAT	2	flanking_window_reference_pA_signal	[0, 2.08907199476, 0.232119110529, 3.2496675474, 94.2403588747, 0, 0, 7.65993064745, 11.6059555264, 19.0337670634, 0, 0, 0, 0, 0, 0, 0.232119110529, 0, 0, 0, 0, 0, 0, 0, 0, 0.232119110529, 0.232119110529, 0.464238221058, 0, 0, 0, 0.232119110529, 0, 0, 0, 0, 0, 0, 0, 0, 0, 0, 0, 0, 0, 0, 0, 0, 0, 0, 0, 0, 0, 0, 0, 0, 0, 0, 0, 0, 0, 0, 0, 0, 0.232119110529, 0, 0, 0, 0, 0, 0, 0, 0, 0, 0, 0, 0, 0, 0,…	0.208525	52	intergenic_region	INT_0_1331	sense
-	chrIV	149238	149254	-	TATCGTTCAACGTGAT	0	flanking_window_reference_pA_signal	[0, 0, 0.232119110529, 0, 0.232119110529, 2.55331021582, 0, 0.928476442115, 0, 0, 0, 0, 0.696357331587, 0, 0, 0.232119110529, 0, 0, 0.232119110529, 0.464238221058, 0, 0, 0, 0, 0, 0, 0, 0, 0.464238221058, 0, 0, 0, 0, 0, 0, 0, 0, 0, 0, 0, 0, 0, 0, 0, 0, 0, 0, 0, 0, 0, 0, 0, 0, 0, 0, 0, 0, 0, 0, 0, 0, 0, 0, 0, 0, 0, 0, 0, 0, 0, 0, 0, 0, 0, 0, 0, 0, 0, 0, 0, 0, 0, 0, 0, 0, 0]	0.625576	51	CDS	GLT1	sense
+	chrIV	1386650	1386666	-	AAACGTCAATAGTGAT	1	flanking_window_reference_pA_signal	[0, 0, 0, 0, 0, 0, 0, 0, 0, 0, 0.464238221058, 0.928476442115, 0, 0, 0.232119110529, 3.71390576846, 0, 11.1417173054, 24.8367448266, 0, 0.696357331587, 0, 0.696357331587, 4.41026310005, 0, 0, 0, 0.928476442115, 1.16059555264, 2.78542932635, 0, 0.232119110529, 19.9622435055, 0, 1.39271466317, 3.71390576846, 0, 0.232119110529, 0.232119110529, 1.85695288423, 0, 0, 0, 0, 0, 0, 0, 0, 0, 0.232119110529…	50.6717	-12	3UTR	MRPL28	sense
-	chrIV	1436782	1436798	-	TTCCGTCAAAAGGGAT	1	flanking_window_reference_pA_signal	[0, 0, 0, 0.464238221058, 0.464238221058, 0, 0, 0, 0, 0, 0.232119110529, 0.928476442115, 0, 0, 0.464238221058, 0.464238221058, 0, 0, 0, 0, 0, 0, 0, 0, 0, 0, 0, 0, 0, 0, 0, 0, 0, 0, 0, 0, 0, 0, 0.232119110529, 1.16059555264, 0, 0, 0, 0, 0, 0, 0, 0, 0, 0.232119110529, 0, 0, 0, 0, 0, 0, 0, 0, 0, 0, 0, 0, 0, 0, 0, 0, 0, 0, 0, 0, 0, 0, 0, 0, 0, 0, 0.232119110529, 0, 0, 0, 0.232119110529, 0, 0, 0, 0, 0]	0	17	intergenic_region	INT_0_2100	sense
-	chrIV	1020499	1020515	-	ATTCGTTGGTAGTGAC	2	flanking_window_reference_pA_signal	[0, 0, 0, 0, 0, 0, 0, 0.232119110529, 0, 1.85695288423, 0.696357331587, 0, 0, 0, 0, 1.39271466317, 0, 0, 0, 0, 0, 0.232119110529, 0, 0, 0, 0.928476442115, 0, 0, 0, 0.696357331587, 0, 0, 0, 0, 0, 0, 0, 0, 0, 0, 0, 0, 0, 0, 0, 0, 0, 0, 0, 0, 0, 0, 0, 0, 0, 0, 0, 0, 0.232119110529, 0.232119110529, 0.928476442115, 0, 0, 0, 0, 0, 0, 0, 0, 0, 0, 0, 0.464238221058, 0, 0, 0, 0, 0, 0, 0, 0, 0, 0, 0, 0, 0]	0	47	intergenic_region	INT_0_1800	sense
-	chrIV	1388632	1388648	-	AAACGTCAAAAGTGAT	1	flanking_window_reference_pA_signal	[0, 0, 0.232119110529, 0, 0, 0.696357331587, 0.696357331587, 0, 0, 0, 0, 0, 0.232119110529, 0, 0, 0, 0, 0, 0, 0, 0, 0, 0, 0, 0, 0, 0, 0, 0, 0, 0, 0, 0, 0, 0, 0, 0, 0, 0, 0, 0, 0, 0, 0, 0, 0, 0, 0, 0, 0, 0, 0, 0, 0, 0, 0, 0, 0, 0, 0, 0, 0, 0, 0, 0, 0, 0, 0, 0, 0, 0, 0, 0, 0, 0, 0, 0, 0, 0, 0, 0, 0, 0, 0, 0, 0]	0	51	intergenic_region	INT_0_2060	sense
-	chrIV	730438	730454	-	CATCGTGCGAAATGAG	2	flanking_window_reference_pA_signal	[0, 0.464238221058, 0.464238221058, 3.01754843688, 0, 0, 0.464238221058, 0.696357331587, 1.39271466317, 0, 0, 0.232119110529, 0.464238221058, 0.232119110529, 0, 0.232119110529, 0, 0, 0, 0.232119110529, 0, 0, 0, 0, 0, 0, 0, 0, 0, 0, 0, 0, 0.232119110529, 0, 0, 0, 0, 0, 0, 0, 0, 0, 0.928476442115, 0, 0, 0, 0, 0.464238221058, 0, 0.696357331587, 0, 0.696357331587, 0, 0, 0, 0, 0, 0, 0, 0, 0, 0, 0, 0, …	0	53	intergenic_region	INT_0_1598	sense
-	chrIV	816646	816662	-	GTTCGTATTATGTGAC	2	flanking_window_reference_pA_signal	[0, 0.464238221058, 0.928476442115, 0, 0, 2.32119110529, 0, 0, 0, 0, 0, 0, 0, 0, 1.6248337737, 0, 0, 0, 1.39271466317, 0, 0, 0.232119110529, 0, 0, 0, 0, 0, 0, 0, 0, 0, 0, 0, 0, 0, 0, 0, 0, 0.464238221058, 0, 0, 0, 0.232119110529, 0, 0, 0, 1.16059555264, 0, 0, 0.464238221058, 0, 0.696357331587, 2.08907199476, 0, 0, 0.464238221058, 0, 0, 4.64238221058, 0, 0, 0, 0, 0, 0, 0, 0, 0, 0.232119110529, 0, …	0.208525	-2	intergenic_region	INT_0_1654	sense
-	chrIV	1402783	1402799	+	TTGCGTGCAAAATGAT	0	flanking_window_reference_pA_signal	[0, 0, 0, 0, 0.232119110529, 0, 0, 0, 0, 0, 1.16059555264, 0, 0, 0.696357331587, 2.55331021582, 0, 0, 0, 0, 0.232119110529, 0, 0, 0, 0, 0, 0, 0, 0, 0, 0, 0, 0, 0, 0, 0, 0, 0, 0, 1.16059555264, 0, 0, 0.232119110529, 0, 0, 0, 0, 0.464238221058, 2.55331021582, 0, 0, 0, 0, 0, 0, 0, 0, 0, 0, 0, 0, 0, 0.232119110529, 0, 0, 0, 0, 0, 0, 0, 0, 0, 0.232119110529, 0, 0, 0, 0, 0, 0, 0, 0, 0, 0, 0, 0, 0, 0]	0.208525	42	intergenic_region	INT_0_2071	sense
-	chrIV	917290	917306	+	TAACGTCCTTAAACAT	2	flanking_window_reference_pA_signal	[0.232119110529, 1.85695288423, 0, 4.41026310005, 0, 0, 0, 0.696357331587, 1.16059555264, 0, 0, 0, 0.464238221058, 0, 0, 6.26721598428, 0, 0, 6.49933509481, 0, 86.8125473378, 0, 0, 1.16059555264, 3.94602487899, 3.71390576846, 0, 0.464238221058, 2.78542932635, 66.8503038323, 303.147558351, 0, 0, 1.85695288423, 3.2496675474, 2.78542932635, 2.55331021582, 16.7125759581, 61.0473260691, 0, 8.588407089…	0	26	intergenic_region	INT_0_1722	sense
+	chrIV	501650	501666	+	ATTCGTGTGTAGCGAT	2	flanking_window_reference_pA_signal	[0, 0, 0, 0, 0, 0, 0, 0, 0, 0, 0, 0, 0, 0, 0, 0, 0, 0, 0, 0, 0, 0, 0, 0, 0, 0, 0, 0, 0, 0, 0, 0, 0, 0, 0, 0, 0, 0, 0, 0.232119110529, 0, 0, 0, 0, 0, 0, 0, 0, 0, 0, 0, 0, 0, 0, 0, 0, 0, 0, 0, 0, 0, 0, 0, 0, 0.232119110529, 0, 0, 0, 0, 0, 0.232119110529, 0, 0, 0, 0, 0, 0, 0, 0, 0, 4.41026310005, 0, 0, 0.232119110529, 3.2496675474, 0]	0.208525	50	CUTs	XUT_4F-248	sense
-	chrIV	251394	251410	+	TTTCGTATTTAGTGAT	0	flanking_window_reference_pA_signal	[0, 0, 0.232119110529, 0, 0, 0, 0.232119110529, 0, 0, 0.696357331587, 1.39271466317, 7.19569242639, 0, 0.232119110529, 0.464238221058, 31.1039608109, 0, 2.55331021582, 0, 0, 0, 0, 0, 0, 0.232119110529, 0, 0, 0, 0, 0.232119110529, 0, 0, 0, 0.232119110529, 3.01754843688, 0, 0, 0, 0, 0, 0.232119110529, 0, 0, 0.696357331587, 0.464238221058, 0, 0, 0, 0, 0, 0, 0, 0, 0, 0, 0, 0, 0, 0, 0, 0, 0, 0, 0, 0, …	0	41	intergenic_region	INT_0_1234	sense
-	chrIV	32161	32177	+	TTCCGTTTTAGTGAAT	2	flanking_window_reference_pA_signal	[0.928476442115, 0, 0.696357331587, 5.10662043163, 0, 0, 0, 0, 0, 0, 0, 0, 0, 0, 0, 0, 0, 0, 0, 0, 0, 0, 0, 0, 0, 0, 0.232119110529, 0, 0, 0, 0, 0, 0, 0, 0, 0, 0, 0, 0, 0, 0, 0, 0, 0, 0, 0, 0, 0, 0, 0, 0, 0, 0, 0, 0, 0, 0, 0, 0, 0, 0, 0, 0, 0, 0, 0, 0, 0, 0, 0, 0, 0, 0, 0, 0, 0, 0, 0, 0, 0, 0, 0, 0, 0, 0, 0]	0.208525	53	intergenic_region	INT_0_1073	sense
+	chrIV	521557	521573	+	ATGCGTACATAGTGAC	2	flanking_window_reference_pA_signal	[0, 0, 0, 0, 0, 0, 0, 0, 0, 0, 0, 0, 0, 0, 0, 0, 0, 0, 0, 0, 0, 0, 0, 0, 0, 0, 0, 0, 0, 0, 0, 0, 0, 0, 0, 0, 0, 0, 0, 0, 0, 0, 0, 0, 0, 0, 0, 0, 0, 0, 0, 0, 0, 0, 0, 0, 0, 0, 0, 0, 0, 0, 0, 0, 0, 0, 0, 0, 0, 0, 0, 2.32119110529, 0.232119110529, 0, 0, 0, 0, 0, 0.232119110529, 0, 0, 0, 0, 0, 0.232119110529, 0]	0.208525	41	3UTR	YDR034W-B	sense
-	chrIV	1189242	1189258	+	TTACGGCCTCTGCGAT	2	flanking_window_reference_pA_signal	[0, 0.232119110529, 0, 0, 0, 0, 1.16059555264, 7.19569242639, 0, 0.928476442115, 0.928476442115, 3.01754843688, 7.42781153692, 0, 0, 0.696357331587, 0.232119110529, 0.232119110529, 0, 0.232119110529, 0, 0, 0, 2.78542932635, 0, 0, 0, 0.232119110529, 0, 0, 0, 0, 0.232119110529, 0.464238221058, 0, 0, 0, 0.696357331587, 0, 0, 0.928476442115, 7.65993064745, 0, 0, 0, 0.464238221058, 0, 0, 0.23211911052…	0	15	CDS	YDR357C	sense
-	chrIV	952565	952581	+	TACAGTCGTCCATAAT	2	flanking_window_reference_pA_signal	[0, 0, 0.232119110529, 0, 0, 0, 0, 0, 0, 0, 0, 0, 0, 0, 0, 0, 0, 0, 0, 0, 0, 0, 0, 0, 0, 0, 0, 0, 0, 0, 0, 0, 0, 0, 0, 0, 0, 0, 0, 0.232119110529, 0.696357331587, 0, 0, 0, 0, 0, 0, 0, 0, 0, 0, 0, 0, 0, 0, 0.232119110529, 0, 0, 0, 0, 0, 0, 0, 0, 0, 0, 0, 0, 0, 3.2496675474, 0, 0.928476442115, 5.57085865269, 0, 0, 0, 0.232119110529, 0, 0, 0, 0, 0, 0, 0, 0, 0]	0.208525	-16	intergenic_region	INT_0_1745	sense
-	chrIV	371038	371054	+	TTACGTTCATCGTGCC	2	flanking_window_reference_pA_signal	[0, 0, 0, 0, 0, 0, 0.232119110529, 0.928476442115, 3.2496675474, 0, 0.696357331587, 0, 0.464238221058, 1.6248337737, 0, 0.696357331587, 0, 0, 0.696357331587, 0, 0, 0, 0, 0.464238221058, 0, 0.232119110529, 0.928476442115, 0, 0, 1.6248337737, 0, 0.928476442115, 0, 0, 0.232119110529, 0, 0, 0, 0, 0, 0, 0.464238221058, 0, 0, 0, 0, 0, 0, 0, 0, 0, 0, 0, 0, 0, 0.232119110529, 0.696357331587, 0, 0, 0, 0, …	0	48	SUTs	SUT462	sense
+	chrIV	859192	859208	+	TTTAGTCAGCTATAAT	2	flanking_window_reference_pA_signal	[0, 0, 0, 0, 0, 0, 0, 0, 0, 0, 0, 0, 0, 0, 0, 0, 0, 0, 0, 0, 0, 0, 0, 0, 0, 0, 0, 0, 0, 0, 0, 0, 0, 0, 0, 0, 0, 0, 0, 0, 0, 0, 0, 0, 0, 0, 0, 0, 0, 0, 0, 0, 0, 0, 0, 0, 0, 0.464238221058, 0, 0, 0, 0, 0, 0.232119110529, 0.232119110529, 0, 0.464238221058, 3.2496675474, 0, 0, 0, 0, 0, 0, 0, 0, 0, 0, 0, 0, 0.232119110529, 0.232119110529, 0, 0, 0, 0]	0	37	3UTR	COQ4	sense
-	chrIV	1261417	1261433	+	TGGTGTAATCCATTAT	2	flanking_window_reference_pA_signal	[0, 0.232119110529, 0, 0, 0, 0, 4.64238221058, 0, 0, 0.232119110529, 0, 0, 0, 0, 0.232119110529, 0.696357331587, 0, 0, 0, 0, 0, 0, 0, 0, 0.232119110529, 0.232119110529, 0, 0, 0, 0.232119110529, 0, 0, 0, 0, 0, 0, 0, 0, 0, 0, 0, 0, 0, 0, 0, 0, 0, 0, 0, 0.232119110529, 0.696357331587, 0, 0, 0.928476442115, 0, 5.33873954216, 0, 0, 0, 2.78542932635, 0, 0, 0, 0, 0, 0, 0, 0, 0, 0.232119110529, 3.0175484…	0	1	SUTs	XUT_4R-515	sense
+	chrIV	462491	462507	+	TTTCGTCAAAAATGCT	1	flanking_window_reference_pA_signal	[0, 0, 0, 0, 0, 0, 0, 0, 0, 0, 0, 0, 0, 0, 0, 0, 0, 0, 0, 0, 0, 0, 0, 0, 0, 0, 0, 0, 0, 0, 0, 0, 0, 0, 0, 0, 0, 0, 0, 0, 0, 0, 0, 0, 0, 0, 0, 0, 0, 0, 0, 0, 0, 0, 0, 0, 0, 0, 0, 0, 0.928476442115, 0, 0, 0, 0.232119110529, 0, 0, 0.696357331587, 0, 0.232119110529, 1.39271466317, 0, 0, 0, 0.232119110529, 0, 0, 0, 1.6248337737, 0, 0, 0.232119110529, 0, 0, 0, 0.232119110529]	0.208525	48	CDS	TRP1	sense
+	chrVIII	332950	332966	-	ATTCGTAATGAGCGAT	2	flanking_window_reference_pA_signal	[0, 0, 0, 0, 0, 0, 0, 0, 0, 0, 0, 0, 0, 0, 0, 0, 0, 0, 0, 0, 0, 0, 0, 0, 0, 0, 0, 0, 0, 0, 0, 0, 0, 0, 0, 0, 0, 0, 0, 0, 0, 0, 0, 0, 0, 0, 0, 0, 0, 0, 0, 0, 0, 0, 0, 0, 0, 0, 0, 0, 1.39271466317, 0, 0.232119110529, 1.16059555264, 1.6248337737, 0, 0.696357331587, 0, 0, 1.6248337737, 0, 0, 0, 0, 0, 0.232119110529, 0, 0, 0, 0, 0.232119110529, 0, 0, 0.232119110529, 1.6248337737, 8.8205262001]	0	55	CDS	ERP5	sense
-	chrVIII	209403	209419	-	GCTCGTATGGAGCGAT	2	flanking_window_reference_pA_signal	[0, 0, 3.48178665793, 0, 0, 0.928476442115, 2.55331021582, 0, 0, 0, 0, 0, 0.232119110529, 0, 0, 0, 0, 0, 0, 0, 0, 0, 0, 0, 0.232119110529, 0.232119110529, 0, 0.232119110529, 0, 0, 0, 0, 0, 0, 0, 0, 0, 0, 0, 0, 0, 0, 0, 0, 0, 0, 0, 0, 0, 0, 0, 0, 0, 0, 0, 0, 0, 0, 0, 0, 0, 0, 0, 0, 0, 0, 0, 0, 0, 0, 0, 0, 0, 0, 0, 0, 0, 0, 0, 0, 0, 0, 0, 0, 0, 0]	0.417051	54	intergenic_region	INT_0_4182	sense
+	chrVIII	332131	332147	-	GATTGTTCTTTGTGAT	2	flanking_window_reference_pA_signal	[0, 0, 0, 0, 0, 0, 0, 0, 0, 0, 0, 0, 0, 0, 0, 0, 0, 0, 0.232119110529, 0, 0, 0, 0, 0.232119110529, 0, 0, 0, 0, 0, 0, 0, 0, 0.232119110529, 0, 0, 0, 0, 0, 5.57085865269, 0, 0, 2.78542932635, 0, 0, 0, 0, 0.232119110529, 1.16059555264, 0, 0, 0, 0, 0, 0, 0.232119110529, 0.232119110529, 0, 0, 2.78542932635, 1.39271466317, 0, 0, 0, 0, 0, 0, 0, 0.696357331587, 0, 0, 0, 0, 0, 0, 0, 0, 0, 0, 0, 0, 0, 0, 0…	0	8	3UTR	ERP5	sense
-	chrVIII	493758	493774	-	ACCCGTCTCAAATGAT	1	flanking_window_reference_pA_signal	[0, 3.01754843688, 5.57085865269, 0, 0, 0.464238221058, 3.94602487899, 0, 0.232119110529, 0, 0.928476442115, 0, 0.696357331587, 4.87450132111, 0, 0, 0, 0, 0, 0, 0, 0, 0, 0, 0, 0, 0, 0, 0, 0, 0, 0, 0, 0, 0, 0, 0, 0, 0, 0.232119110529, 0, 0, 0.464238221058, 0, 0, 0, 0, 0, 0, 0, 0, 0, 0, 0, 0, 0, 0, 0, 0, 0, 0, 0, 0, 0, 0, 0, 0, 0, 0, 0, 0, 0, 0, 0, 0, 0, 0, 0, 0, 0, 0.464238221058, 0, 0, 0, 0, 0]	0.208525	54	intergenic_region	INT_0_4409	sense
+	chrVIII	160574	160590	+	GACCGTTAACGGTTAT	2	flanking_window_reference_pA_signal	[0, 0, 0, 0, 0, 0, 0.232119110529, 0.232119110529, 0, 0, 0, 0, 0.696357331587, 0, 0.464238221058, 0, 0, 0, 0, 0, 0, 0, 0, 0.232119110529, 0, 0, 0, 0, 0, 0, 0, 0, 0, 0, 0, 0, 2.32119110529, 0, 0, 0, 0.464238221058, 2.78542932635, 2.55331021582, 36.6748194636, 0, 10.6774790843, 97.2579073116, 0, 5.33873954216, 6.96357331587, 16.0162186265, 45.7274647742, 34.5857474688, 0, 0.928476442115, 1.62483377…	2.50231	16	3UTR	THR1	sense
+	chrVIII	102484	102500	+	TACCGTTATTAGTGAT	0	flanking_window_reference_pA_signal	[0, 0, 0, 0, 0, 0, 0, 0, 0, 0, 0, 0, 0, 0, 0, 0, 0, 0, 0, 0, 0, 0, 0, 0, 0, 0, 0, 0, 0, 0.232119110529, 2.55331021582, 0, 0.696357331587, 0, 0, 0, 0.696357331587, 0, 0.464238221058, 3.2496675474, 0, 0.232119110529, 0.464238221058, 0.928476442115, 0, 0, 0.464238221058, 0, 0, 0, 0, 0, 0, 0, 0, 0, 0, 0, 0, 0, 0, 0, 0, 0, 0, 0, 0.464238221058, 0, 0.928476442115, 0, 0, 0, 0.464238221058, 4.17814398952…	0	43	intergenic_region	INT_0_4093	sense
-	chrXVI	313097	313113	-	TTTTGTATATTATGAT	1	flanking_window_reference_pA_signal	[0, 0, 0, 0, 0, 0.232119110529, 0, 0, 0, 0, 0, 0, 0, 0, 0.232119110529, 0.232119110529, 0, 0, 0, 0, 0, 0.232119110529, 0, 0, 0.464238221058, 0, 0, 0, 0, 0, 0, 0, 0, 0.232119110529, 0, 0, 0, 0, 0, 0, 0, 0, 0.232119110529, 0, 0, 0, 0, 0, 0, 0.232119110529, 0, 0, 0, 0, 0, 0, 0, 0, 0, 0, 0, 0, 0, 0, 0, 0, 0.464238221058, 0, 0, 0, 0, 0, 0, 0, 0, 0, 0.232119110529, 0, 0, 0, 0, 0, 0, 0, 0, 0]	0	32	intergenic_region	INT_0_8627	sense
+	chrXVI	69115	69131	-	GCTCGTGTTGAGTGAT	1	flanking_window_reference_pA_signal	[0, 0, 0, 0, 0, 0, 0, 0, 0, 0, 0, 0, 0, 0, 0, 0.464238221058, 0, 0, 0, 0, 0, 0, 0.696357331587, 2.78542932635, 0, 0, 3.2496675474, 0, 0, 3.2496675474, 0, 0, 2.32119110529, 0, 0, 0, 0.928476442115, 0, 0, 0, 0, 0, 0, 0, 0, 0, 0, 0, 0, 0, 0, 0, 0, 0, 0, 0, 0, 0, 0, 0, 0, 0, 0, 0, 0, 0, 0, 0, 0, 0, 0, 0, 0, 0, 0, 0, 0, 0, 0, 0, 0, 0, 0, 0, 0, 0]	3.96198	-4	3UTR	BBP1	sense
+	chrXVI	30340	30356	-	GTACGTAAGTTTTCAT	2	flanking_window_reference_pA_signal	[0, 0, 0, 0, 0, 0, 0, 0, 0, 0, 0, 0, 0, 0, 0, 0, 0, 0, 0, 0, 0, 0, 0, 0, 0, 0, 0, 0, 0, 0, 0, 0, 0, 0, 0, 0, 0, 0, 0, 0, 0, 0, 0, 0, 0, 0, 0, 0, 0, 0.464238221058, 0, 0, 0, 0, 0, 0, 0.696357331587, 0, 0, 0, 0.232119110529, 0.232119110529, 0, 0, 0.464238221058, 0, 0, 0.464238221058, 0.464238221058, 0, 0.232119110529, 16.0162186265, 0, 34.3536283583, 0, 0, 6.73145420534, 30.8718417003, 0, 6.4993350…	0	53	3UTR	ATP15	sense
+	chrXVI	885648	885664	-	AAACGTGGGAAGTGAC	2	flanking_window_reference_pA_signal	[0, 0, 0, 0, 0.232119110529, 0, 0, 0, 0, 0.232119110529, 0, 0, 0, 0, 0, 3.01754843688, 0, 5.10662043163, 0, 0.464238221058, 0, 0, 0.232119110529, 0.464238221058, 0, 0, 2.55331021582, 0, 0, 0, 0, 0.928476442115, 5.33873954216, 0, 0.232119110529, 0, 0, 0, 0, 0, 0, 0, 0, 0, 0, 0, 0, 0, 0, 0.232119110529, 0, 0, 0.696357331587, 0.696357331587, 0, 0, 0, 0, 0, 0, 0, 0, 0, 0, 0, 0, 0, 0, 0, 0, 0, 0, 0, 0…	7.92397	2	3UTR	BSP1	sense
-	chrXVI	114441	114457	-	AGACGTACACAATGAT	1	flanking_window_reference_pA_signal	[0, 1.39271466317, 2.08907199476, 1.16059555264, 0.232119110529, 0, 1.6248337737, 13.2307893001, 0.696357331587, 4.41026310005, 27.1579359319, 0, 0.464238221058, 0.232119110529, 0, 2.32119110529, 0, 0, 0, 0.232119110529, 0, 0, 0.696357331587, 0, 0, 0, 0, 0, 0, 0, 0, 0, 0, 0, 0, 0, 0, 0, 0, 0, 0, 0, 0, 0, 0, 0, 0, 0, 0, 0, 0, 0, 0, 0, 0, 0, 0, 0, 0, 0, 0, 0, 0, 0, 0, 0, 0, 0, 0, 0, 0, 0, 0, 0, 0, …	0	46	SUTs	XUT_16R-54	sense
+	chrXVI	32894	32910	-	TATCGATTCGGGTAAT	2	flanking_window_reference_pA_signal	[0, 0, 0, 0, 0, 0, 0, 0, 0, 0, 0, 0, 0.464238221058, 0, 0, 0, 0, 0, 0, 0, 0, 0, 0, 1.85695288423, 0, 0, 0, 0, 0.232119110529, 5.33873954216, 0, 0.232119110529, 9.05264531063, 0, 0.232119110529, 0.232119110529, 16.0162186265, 14.1592657423, 0, 0, 0, 0, 0, 0, 0.696357331587, 0, 0, 0, 0, 0, 0.232119110529, 0, 0, 0, 0, 0, 0.696357331587, 0, 0.232119110529, 0, 0, 0, 0, 0, 0, 0, 0, 0, 0, 0, 0, 0, 0, 0.…	1.45968	6	3UTR	MDL2	sense
-	chrXVI	892204	892220	-	TTCCGTACTTAATGAC	1	flanking_window_reference_pA_signal	[0, 0, 0, 0, 0, 0, 0, 0, 0, 1.16059555264, 0, 0, 0, 0, 0.232119110529, 0, 0, 0, 0.232119110529, 0, 0, 0, 0, 0, 0, 0, 0, 0, 0, 0, 0, 0, 0, 0, 0, 0, 0, 0, 0, 0, 0, 0, 0, 0, 0, 0, 0, 0, 0, 0, 0, 0, 0, 0, 0, 0, 0, 0, 0, 0, 0, 0, 0, 0, 0, 0, 0, 0, 0, 0, 0, 0, 0, 0, 0, 0, 0, 0, 0, 0, 0, 0, 0, 0, 0, 0]	0	47	intergenic_region	INT_0_9084	sense
-	chrXVI	883662	883678	+	CCTCGTTCCATGTGAC	2	flanking_window_reference_pA_signal	[0, 0, 0.464238221058, 0, 0, 0, 0, 0, 0, 0, 0, 0, 0, 0, 0, 0.232119110529, 0, 0, 0, 0, 0, 0, 0, 0, 0, 0, 0, 0, 0, 0, 0, 0, 0, 0, 0, 0, 0, 0, 0, 0, 0, 0, 0, 0, 0, 0, 0, 0, 0, 0, 0, 0.232119110529, 1.85695288423, 4.64238221058, 0, 1.85695288423, 0, 0, 0, 0.464238221058, 0, 0.232119110529, 0, 0, 0.232119110529, 4.17814398952, 0, 0, 0.928476442115, 0, 0, 0, 0, 0, 0, 0, 0, 0, 0, 0, 0, 0, 0, 0, 0, 0]	3.33641	3	intergenic_region	INT_0_9075	sense
+	chrXVI	465665	465681	+	TCATGTCGCCTTTTAT	2	flanking_window_reference_pA_signal	[0, 0, 0, 0, 0, 0, 0, 0, 0, 0, 0, 0, 0, 0, 0, 0, 0, 0, 0, 0, 0, 0, 0, 0, 0, 0, 0, 0, 0, 0, 0, 0, 0, 0, 0, 0, 0, 0, 0, 0, 0, 0, 0, 0, 0, 0, 0, 0, 0, 0, 0, 0, 0, 0, 0, 0, 0, 0, 0, 0, 0, 0, 0, 0, 0, 0, 0, 0.232119110529, 0.232119110529, 0, 0, 0, 0.232119110529, 0, 0, 0, 0, 0, 0, 0, 0, 0, 0, 0.696357331587, 0, 0]	0	53	CDS	CAM1	sense
+	chrXVI	812824	812840	+	TAGCGTGGAAAGCGAG	2	flanking_window_reference_pA_signal	[0, 0, 0, 0, 0, 0, 0, 0, 0, 0, 0, 0, 0, 0, 0.232119110529, 0, 0, 0, 0, 0, 0, 0, 0, 0, 0, 0, 0, 0, 0, 0, 0.232119110529, 0, 0, 0, 0, 0, 0, 0.696357331587, 0, 0, 0, 0, 0, 0, 0, 0, 0, 0, 0, 0, 0, 0, 0, 0, 0, 0, 0, 0, 0, 0, 0, 0, 0.696357331587, 0, 0, 0, 0, 0, 0.232119110529, 0, 0, 0, 0, 0, 0, 0, 0, 0, 0, 0, 0, 0, 0, 0, 0, 1.39271466317]	2.08525	55	SUTs	XUT_16F-324	sense
-	chrXVI	162467	162483	+	TTTCTTTTTTTATGAT	1	flanking_window_reference_pA_signal	[0, 0, 0, 0, 0, 4.41026310005, 0, 0, 0.232119110529, 2.78542932635, 0, 0.928476442115, 2.08907199476, 0, 0.464238221058, 3.48178665793, 0, 0, 0.232119110529, 0, 0, 0, 1.39271466317, 0, 0, 2.32119110529, 0, 0, 0, 0, 0, 0.232119110529, 0, 0, 0, 0, 0, 0, 0.232119110529, 0, 0, 0, 0.232119110529, 0.696357331587, 0, 0, 0, 0, 0, 0, 0.232119110529, 0, 0, 0, 0, 0, 0, 0, 0, 0, 0, 0, 0, 0, 0, 0, 0, 0, 0, 0,…	0.834102	51	3UTR	INT_0_8512	sense
+	chrXVI	244165	244181	+	TCCCTTCCACTCTCAT	2	flanking_window_reference_pA_signal	[0, 0, 0, 0, 0, 0, 0, 0, 0, 0, 0, 0, 0, 0, 0, 0, 0, 0.232119110529, 0, 0, 0, 0, 0, 0, 0, 0.232119110529, 0, 0, 0, 0, 0, 0, 0.232119110529, 0, 0, 0, 0, 0.464238221058, 0, 0, 0, 0, 0, 0.464238221058, 0, 0, 0, 0, 0, 0, 0.696357331587, 0, 0, 0, 0, 0, 0, 0, 0, 0, 0, 0, 0, 0, 0, 0, 0, 0, 0, 0, 0, 0, 0, 0, 0, 0, 0, 0, 0, 0, 0, 0, 0, 0, 0, 0]	0.208525	20	SUTs	XUT_16F-95	sense
+	chrXVI	802078	802094	+	CATCGTTCAAAATGCT	2	flanking_window_reference_pA_signal	[0, 0, 0.232119110529, 0, 0, 0, 0, 0.464238221058, 0, 4.64238221058, 0, 0.928476442115, 0, 0, 0.232119110529, 0, 0, 5.10662043163, 0, 0, 0, 0, 0, 0, 0.232119110529, 2.78542932635, 0, 0, 0, 0, 0, 0, 0, 0, 0, 0, 0, 0, 0, 0, 0, 0, 0, 0, 0, 0, 0, 0, 0, 0, 0, 0, 0, 0, 0, 0, 0, 0, 0, 0, 0, 0, 0, 0, 0, 0, 0, 0, 0, 0.232119110529, 0, 0, 0, 0, 0, 0.232119110529, 0, 0, 0, 0, 0, 0, 0, 0, 0, 0]	5.63019	-13	3UTR	RRP9	sense
+	chrXVI	106846	106862	+	CCTCGTGGTAAATGAT	1	flanking_window_reference_pA_signal	[0, 0, 0, 0, 0, 0, 0, 0, 0, 0, 0, 0, 0, 0, 0, 0, 0, 0, 0, 0, 0, 0, 0, 0, 0, 0, 0, 0.232119110529, 0, 0, 0, 0, 0, 0, 0, 0, 0, 0, 0, 0, 0, 0, 0, 0.464238221058, 0, 0.464238221058, 0, 0, 0.232119110529, 0.464238221058, 0, 0, 0, 0, 0, 0, 0, 0, 0, 0, 0.696357331587, 0, 0, 0, 1.85695288423, 0, 0, 0, 1.16059555264, 0, 0, 0, 0, 0, 0, 0, 0, 0, 0, 0, 0, 0, 0, 0, 0, 0]	0	34	CDS	NSL1	sense
-	chrXVI	730336	730352	+	TGTCCTGAAATATGAC	2	flanking_window_reference_pA_signal	[0, 2.78542932635, 38.5317723478, 0, 0, 5.80297776322, 0, 0, 0.928476442115, 17.6410524002, 0, 0, 0, 0.464238221058, 0.696357331587, 22.7476728318, 0, 0, 0, 0, 0.232119110529, 0.232119110529, 0, 0.464238221058, 0, 0, 0, 0, 0, 0.464238221058, 6.26721598428, 0, 0.232119110529, 0, 0, 0.232119110529, 0, 0, 0, 0, 0, 0, 0, 0, 0.232119110529, 0, 0, 0, 0, 0, 0, 0, 0.696357331587, 0, 0, 0, 0.232119110529,…	0	54	5UTR	YPR099C	sense
-	chrIII	52510	52526	-	GCCCGTTTCCGATGAT	1	flanking_window_reference_pA_signal	[0, 0.232119110529, 0, 0, 0, 0, 0, 0, 0, 0, 0, 0, 0, 0, 0, 0, 0, 0, 0, 0, 0.232119110529, 0, 0, 0.464238221058, 5.10662043163, 0, 0.464238221058, 0, 0, 0.928476442115, 0, 0, 0.232119110529, 0.232119110529, 0, 0, 0.464238221058, 0, 0, 0, 0, 0, 0.232119110529, 0, 0, 0, 2.08907199476, 35.5142239109, 0, 0, 0, 0.232119110529, 0.232119110529, 0, 0, 0, 0, 0, 0, 0, 0, 0, 0, 0, 0, 0, 1.16059555264, 0, 0, …	0.208525	9	intergenic_region	INT_0_841	sense
-	chrIII	186135	186151	-	CGGCGTTGGTAATGAT	1	flanking_window_reference_pA_signal	[0.928476442115, 0.928476442115, 1.16059555264, 4.64238221058, 0, 0, 0.232119110529, 2.78542932635, 7.89204975798, 0, 0.232119110529, 0.928476442115, 2.78542932635, 0, 0.232119110529, 0.232119110529, 0, 0, 0, 0.464238221058, 0.928476442115, 0, 0, 0, 0, 0, 0, 0, 0, 0, 0, 0, 0, 0, 0, 0, 0.232119110529, 0, 0, 0, 0, 0, 0, 0, 0, 0.232119110529, 0, 0, 0, 0, 0, 0, 0, 0, 0, 0, 0, 0.928476442115, 0.232119…	0	48	intergenic_region	INT_0_960	sense
-	chrIII	213988	214004	+	TTTCGATGCCTTTGAT	1	flanking_window_reference_pA_signal	[0, 0, 0, 0, 0.928476442115, 0, 0, 3.2496675474, 0, 0.928476442115, 0, 0, 0.232119110529, 0.928476442115, 0.232119110529, 0.696357331587, 0.464238221058, 0, 0, 0.928476442115, 0, 0, 0, 0, 0, 0.464238221058, 0, 0.232119110529, 0, 0, 0, 0, 0, 0, 0, 0, 0, 0, 0, 0, 0, 0, 0, 0, 0, 0, 0, 0, 0, 0, 0, 0, 0, 0, 0, 0, 0, 0, 0, 0, 0, 0, 0, 0, 0, 0, 0, 0, 0, 0, 0, 0, 0, 0, 0, 0, 0, 0, 0, 0, 0, 0, 0, 0, 0, 0]	0.208525	49	XUTs	INT_0_985	sense
+	chrIII	224821	224837	+	TTCCGTGTATATGGTT	2	flanking_window_reference_pA_signal	[0, 0, 0, 0, 0, 0, 0, 0, 0, 0, 0, 0, 0, 0, 0, 0, 0, 0, 0, 0, 0, 0, 0, 0, 0, 0, 0, 0, 0, 0, 0, 0.232119110529, 0, 0, 0, 0, 0, 0.232119110529, 0, 0, 0, 0, 0, 0, 0, 0, 0, 0, 0.232119110529, 0, 0, 0, 0, 0, 0.464238221058, 0, 0.232119110529, 0, 0, 0, 0, 0.696357331587, 1.39271466317, 0.464238221058, 3.94602487899, 55.9407056375, 0, 3.94602487899, 0.464238221058, 0.232119110529, 0.232119110529, 3.24966…	0	35	3UTR	TAH1	sense
-	chrVII	316612	316628	-	TAACGCTGTCATTAAT	2	flanking_window_reference_pA_signal	[0, 0, 0, 1.39271466317, 0, 0, 0, 0, 0, 0, 0, 0, 0, 0, 0, 0, 0, 0, 0, 1.39271466317, 0, 4.64238221058, 49.6734896532, 0, 0.232119110529, 0.928476442115, 0, 0.232119110529, 0.464238221058, 1.6248337737, 12.5344319686, 0, 0, 0, 0, 0, 0, 0.232119110529, 5.10662043163, 0, 0, 0, 0.464238221058, 0, 0, 0, 0, 0, 0, 0, 0, 0, 0, 0, 0, 0, 0, 0, 0, 0, 0, 0.464238221058, 0, 0, 0, 0, 0, 0, 0, 0.232119110529, 0…	0	34	intergenic_region	INT_0_3416	sense
+	chrVII	523440	523456	-	TGACGGCAATATTGCT	2	flanking_window_reference_pA_signal	[0, 0, 0, 0, 0, 0, 0, 0, 0, 0, 0.232119110529, 0, 0, 0, 0, 0, 0, 0, 0, 0, 0, 0, 0.232119110529, 0, 0, 0, 0, 0, 0, 0.464238221058, 0, 0, 0, 0, 0, 0, 0, 0, 0, 0, 0, 0, 0, 0, 0, 0, 0, 0, 0, 0.232119110529, 0, 0, 0, 0, 0, 0, 0, 0, 0, 0, 0, 0, 0, 0, 0, 0, 0, 0, 0, 0, 0, 0.232119110529, 0, 0, 0, 0, 0, 0, 0, 0, 0, 0.232119110529, 0, 0, 0, 0]	0.417051	-1	3UTR	YGR017W	sense
-	chrVII	832270	832286	-	TATCGTGTAATGTGAT	0	flanking_window_reference_pA_signal	[0, 0.232119110529, 0, 0.232119110529, 0, 0, 0, 0, 0, 0, 0.232119110529, 0, 0, 0, 0, 0, 0, 0, 0, 0, 0, 0, 0.928476442115, 0, 0.232119110529, 0, 0, 0, 0, 0, 0, 0, 0, 0.232119110529, 0, 0, 0.232119110529, 0, 0, 0.232119110529, 0, 0.464238221058, 14.6235039633, 0, 2.78542932635, 0, 0.464238221058, 12.7665510791, 0, 0.928476442115, 0, 0, 0, 0, 0, 0, 0.464238221058, 0, 0, 0, 0.232119110529, 0, 0, 0, 0…	0.417051	14	intergenic_region	INT_0_3830	sense
-	chrVII	98736	98752	-	TATCGTGGTTTGTGAT	0	flanking_window_reference_pA_signal	[0, 0, 0, 0, 0, 0, 0, 0.232119110529, 3.01754843688, 0, 0, 0, 0.232119110529, 0, 1.39271466317, 0, 0, 2.55331021582, 0, 0.928476442115, 2.08907199476, 0, 0.928476442115, 0, 0, 0.232119110529, 2.55331021582, 0, 0, 0, 0, 0, 0, 0, 0, 0, 0, 0, 0, 0.232119110529, 0, 0, 0, 0, 0.464238221058, 0, 0, 0, 0.232119110529, 0, 0, 0, 0, 0, 0, 0, 0, 0, 0, 0, 0, 0, 0, 0, 0, 0, 0, 0, 0, 0, 0, 0, 0, 0, 0, 0.2321191…	0.834102	48	intergenic_region	INT_0_3268	sense
+	chrVII	343162	343178	-	TGGTGTAATTAGTAAT	2	flanking_window_reference_pA_signal	[0, 0, 0, 0, 0, 0, 0, 0, 0.232119110529, 0, 0, 0, 0, 0, 0, 0, 0, 0, 0, 0, 0, 0, 0, 0, 0, 0.232119110529, 0, 0, 0, 0, 0, 0, 0.232119110529, 0, 0, 0.232119110529, 0, 0, 0, 0, 0, 0, 0, 0, 0, 0, 0, 0.232119110529, 0, 0, 0, 0, 0, 0, 0, 0, 0, 0, 0, 0, 0, 0, 0, 0, 0, 0, 0, 0, 0, 0, 0.232119110529, 0, 0, 0, 0, 0, 0.232119110529, 0, 0, 0, 0, 0, 0, 0, 0, 0]	0.625576	-22	intergenic_region	INT_0_3433	sense
+	chrVII	996717	996733	-	AAACGTATATAATGAT	1	flanking_window_reference_pA_signal	[0, 0, 0, 0, 0, 0, 0, 0, 0, 3.71390576846, 0, 0.464238221058, 0, 0, 0, 0, 0.696357331587, 0, 0, 0, 0, 0, 0, 0, 0, 0, 0, 0, 0, 0, 0, 0, 0, 0, 0, 0, 0, 0, 0, 0, 0, 0, 0, 0, 0, 0, 0, 0, 0, 0, 0, 0, 0, 0, 0, 0, 0, 0, 0, 0, 0, 1.39271466317, 5.57085865269, 0, 0, 0, 0, 0, 0, 0, 0.696357331587, 0, 1.6248337737, 0, 0, 0, 0, 0.232119110529, 2.32119110529, 12.7665510791, 0, 0, 0, 0, 0, 0]	1.6682	49	3UTR	YGR251W	sense
+	chrVII	307237	307253	-	TACCATTATCATTTAT	2	flanking_window_reference_pA_signal	[0, 0, 0, 0, 0, 0, 0, 0, 0, 0, 0, 0, 0, 0, 0, 0, 0, 0, 0, 0, 0, 0, 0, 0, 0.232119110529, 0, 0, 0, 0, 0, 0, 0, 0, 0, 0, 0, 0, 0, 0.232119110529, 0, 0, 0, 0, 0.928476442115, 0.464238221058, 0, 0, 0, 0.696357331587, 2.08907199476, 0, 5.80297776322, 0, 0.232119110529, 0.696357331587, 5.57085865269, 0, 0, 3.2496675474, 0, 0, 1.39271466317, 0, 0, 0.232119110529, 0, 0, 0, 0, 0, 0, 0, 0, 0, 0, 0, 0, 0, 0…	0	21	3UTR	INT_0_3408	antisense
+	chrVII	93638	93654	-	CGCCGTACTATATTAT	2	flanking_window_reference_pA_signal	[0, 0, 0, 0, 0, 0, 0, 0, 0, 0, 0, 0, 0, 0, 0, 0, 0.232119110529, 0, 0, 0, 0, 0, 0, 0, 0, 0, 0.232119110529, 0, 0, 0, 0, 1.85695288423, 0, 0, 0.696357331587, 0, 0.232119110529, 0, 0.464238221058, 0.232119110529, 0, 0, 0, 0.232119110529, 0, 0, 0, 0.232119110529, 0.232119110529, 0.232119110529, 0, 0, 0, 0.464238221058, 0, 0, 2.08907199476, 0, 1.6248337737, 0, 0, 0, 0, 0, 0, 0, 0, 0, 0.232119110529, …	0.208525	40	3UTR	YPT32	sense
+	chrVII	601486	601502	+	TTCCGTCAATAGTGAT	0	flanking_window_reference_pA_signal	[0, 0, 0, 0, 0, 0, 0, 0, 0, 0, 0, 0, 0, 0, 0, 0, 0, 0, 0, 0, 0, 0, 0, 0, 0, 0, 0, 0, 0, 0, 0, 0, 0, 0, 0, 0, 0, 0, 0, 0, 0, 0, 0, 0, 0, 0, 0, 0, 0, 0, 0, 0, 0, 0, 0, 0, 0, 0, 0, 0, 0, 0, 0, 0, 0, 0, 0, 0, 0.696357331587, 0.232119110529, 0, 0.232119110529, 0, 0, 0, 0, 0, 0, 0, 0, 0, 0, 0, 0, 0, 0]	0	38	5UTR	INT_0_3640	sense
+	chrVII	319665	319681	+	TGTTGTTCGTTTTGTT	2	flanking_window_reference_pA_signal	[0, 0, 0, 0, 0, 0, 0, 0, 0, 0, 0, 0, 0, 0, 0, 0, 0, 0, 0, 0, 0, 0, 0, 0, 0, 0, 0, 0, 1.39271466317, 0, 0, 0, 0, 0.232119110529, 0.232119110529, 0, 0, 0, 0, 0, 0, 0, 0, 0, 0, 0, 0, 0, 0, 0, 0, 0, 0, 0, 0, 0, 0, 0, 0, 0, 0, 0, 0, 0, 0, 0, 0, 0, 0, 0.232119110529, 0, 0, 0, 0, 0, 0, 0, 0, 0.232119110529, 0, 0, 0, 0, 0, 0, 0]	0.417051	-2	intergenic_region	INT_0_3419	sense
-	chrVII	454643	454659	+	TTCCCGTTATTATGAT	2	flanking_window_reference_pA_signal	[0, 0, 0, 0, 0, 0, 0, 0, 0, 0.232119110529, 0, 0, 0, 0, 0, 0, 0, 0, 0, 0.464238221058, 0, 0, 0.696357331587, 0, 0, 6.96357331587, 0, 0, 0.232119110529, 0, 0, 0.696357331587, 2.55331021582, 0.464238221058, 0.232119110529, 2.08907199476, 12.302312858, 58.9582540743, 15.0877421844, 1.85695288423, 0.928476442115, 9.51688353168, 3.94602487899, 4.64238221058, 0.696357331587, 1.85695288423, 5.3387395421…	0	19	intergenic_region	INT_0_3533	sense
+	chrVII	949091	949107	+	TTTTGTATATATTGAT	1	flanking_window_reference_pA_signal	[0, 0, 0, 0.928476442115, 6.03509687375, 0, 0.232119110529, 0, 0, 3.94602487899, 3.94602487899, 0, 0, 0, 0, 0, 0, 0.464238221058, 0, 0, 0, 0.232119110529, 0, 0, 4.64238221058, 0, 0, 0, 0, 0, 0, 0, 0, 0, 0.232119110529, 0.928476442115, 0, 1.16059555264, 0, 0.464238221058, 0, 0.464238221058, 0.464238221058, 2.08907199476, 0, 0, 0, 0, 0, 0, 0.464238221058, 0, 0, 0, 0, 0, 0, 0, 0, 0, 0, 0, 0, 0, 0, 0…	10.8433	-26	3UTR	DIE2	sense
-	chrVII	1031662	1031678	+	ATACGTTTCGGGTAAT	2	flanking_window_reference_pA_signal	[0.464238221058, 0, 0, 0, 0, 0, 0, 0.928476442115, 0.464238221058, 0, 0.232119110529, 0.928476442115, 0, 0, 0, 0.232119110529, 1.85695288423, 0, 0, 0, 0.232119110529, 1.16059555264, 0, 0, 0.232119110529, 0, 0, 0, 0, 0, 0, 0, 0, 0, 0, 0, 0, 0, 0, 1.39271466317, 0, 0, 0, 0, 0, 0, 0, 0, 0, 0, 0, 0, 0, 0, 0, 0, 0, 0, 0, 0, 0, 0, 0, 0, 0, 0, 0, 0, 0, 0, 0, 0, 0, 0, 0, 0, 0, 0, 0, 0, 0, 0, 0, 0, 0, 0]	0	40	intergenic_region	INT_0_3980	sense
+	chrVII	641893	641909	+	TTTTGTAGGATTTGAA	2	flanking_window_reference_pA_signal	[0, 0, 0, 0, 0, 0, 0, 0, 0, 0.232119110529, 0, 0, 0, 0, 0, 0, 0, 0, 0, 0, 0, 0.464238221058, 0.696357331587, 0, 0, 0.232119110529, 0, 0, 0.232119110529, 0, 0, 0, 0, 0, 0.232119110529, 0.696357331587, 0, 0, 2.55331021582, 0, 0, 0, 0, 0, 0, 0, 0, 0, 0, 0, 0, 0, 0, 0, 0.928476442115, 0, 1.16059555264, 9.05264531063, 0, 93.0797633221, 0, 0, 3.71390576846, 0, 0, 3.94602487899, 12.0701937475, 0, 1.6248…	1.6682	29	3UTR	INT_0_3675	antisense
-	chrVII	278490	278506	+	TTCCGTTTAGAGTGAG	1	flanking_window_reference_pA_signal	[0, 0, 0, 0, 0, 0, 0.928476442115, 1.85695288423, 0, 0.464238221058, 0, 0.232119110529, 1.39271466317, 1.16059555264, 62.4400407323, 52.69103809, 2.32119110529, 68.475137606, 1733.00127921, 1557.98346987, 0, 0, 9.05264531063, 18.1052906213, 0, 0.928476442115, 1.85695288423, 1.85695288423, 1.16059555264, 0, 0, 0, 0.464238221058, 0, 0.464238221058, 0.232119110529, 0, 0, 0, 0, 0, 0.232119110529, 0, …	1.45968	38	3UTR	INT_0_3386	sense
+	chrVII	377262	377278	+	TATAATAAACATTGAT	2	flanking_window_reference_pA_signal	[0, 0.232119110529, 0, 0, 0, 0, 0, 0, 0, 0, 0, 0, 0, 0, 0.232119110529, 0, 0, 0.232119110529, 0.232119110529, 0, 0, 0, 0, 0, 0, 0, 0, 0.928476442115, 0, 0, 0, 0, 0, 0, 0, 0, 0, 0, 0, 0, 0, 0, 0, 3.94602487899, 0, 27.8542932635, 0, 0, 0, 1.6248337737, 0, 0.464238221058, 2.32119110529, 0, 0.232119110529, 1.85695288423, 1.16059555264, 1.16059555264, 0, 0.696357331587, 13.9271466317, 0, 0.69635733158…	0	15	CDS	NPY1	sense
+	chrVII	999289	999305	+	TTTCGTGAATAGTGAT	0	flanking_window_reference_pA_signal	[0, 0, 0, 0, 0, 0, 0, 0, 0, 0, 0, 0, 0, 0, 0, 0, 0, 0, 0, 0, 0, 0, 0, 0, 0, 0, 0, 0, 0, 0, 0, 0, 0, 0, 0, 0.464238221058, 0.232119110529, 0, 0, 0, 0, 0, 0.464238221058, 0, 0, 0, 0, 0, 0, 0, 0, 0, 0, 0, 0, 0, 0, 0, 0, 0, 0, 0, 0, 0, 0, 0, 0, 0, 0, 0, 0, 0, 0, 0, 0, 0, 0, 0, 0, 0, 0, 0, 0, 0, 0, 0]	0.208525	5	intergenic_region	INT_0_3957	sense
+	chrVII	217326	217342	+	TAACGGAAATTGTAAT	2	flanking_window_reference_pA_signal	[0, 0, 0, 0, 0, 0, 0, 0, 0, 0, 0, 0, 0, 0, 0, 0, 0, 0, 0, 0, 0, 0, 0, 0, 0, 0, 0, 0, 0, 0, 1.16059555264, 0, 0, 0, 0, 4.64238221058, 0, 0, 0, 0, 0, 0, 0.232119110529, 0, 0, 0, 0, 3.2496675474, 13.9271466317, 0, 0, 0, 0, 0, 0, 0, 0, 1.85695288423, 0, 0, 0, 0, 0, 0, 0, 0, 0.232119110529, 0, 0.696357331587, 0, 0, 0, 0, 0.928476442115, 1.6248337737, 0, 0, 0, 0, 0, 0.232119110529, 0, 0, 0, 0.464238221…	0	18	CDS	PEX14	sense
-	chrVII	635584	635600	+	TTTCGTATTTAATGAT	0	flanking_window_reference_pA_signal	[0.928476442115, 0, 0.232119110529, 0, 0, 0.464238221058, 0, 0, 1.16059555264, 0, 0, 0, 0.232119110529, 0, 0, 0, 0, 0.464238221058, 0, 0, 0, 0, 0, 0, 0, 0, 0, 0.232119110529, 0, 0.928476442115, 0, 0, 0, 0, 0, 0, 0, 0, 0, 0, 0, 0, 0, 0, 0, 0.928476442115, 0, 0, 0.232119110529, 1.6248337737, 0, 0, 0, 0, 0, 0, 0, 0, 0, 0, 0, 0, 0, 0, 0, 0, 0, 0, 0, 0, 0, 0, 0, 0, 0, 0, 0, 0, 0, 0, 0, 0, 0, 0, 0, 0]	0.417051	7	3UTR	INT_0_3668	sense
+	chrVII	513014	513030	+	TCGCGTTACTATTAAT	1	flanking_window_reference_pA_signal	[0, 0, 0, 0.232119110529, 0, 0.464238221058, 0, 0.232119110529, 0, 0, 0, 0, 0, 0.464238221058, 0, 0, 0, 0, 1.39271466317, 0, 0, 0, 0, 0, 0, 0, 0, 0.232119110529, 0, 0, 0, 0, 0, 0, 0, 0, 0, 0, 0, 0, 0, 0, 0, 0, 0, 0, 0, 0, 0, 0, 0, 0, 0, 0, 0, 0, 0, 0, 0, 0, 0, 0, 0, 0, 0.232119110529, 0.232119110529, 0, 0, 0, 0, 0, 0, 0, 0, 0, 0.232119110529, 0, 0, 0, 0, 0, 0, 0, 0, 0, 0]	2.71083	-12	3UTR	YGR011W	sense
+	chrVII	922019	922035	+	TAGCGTATATAGTGAT	0	flanking_window_reference_pA_signal	[0, 0, 0, 0, 0, 0, 0, 0, 0, 0, 0, 0, 0, 0.232119110529, 0, 0, 0, 0, 0, 0, 0, 0, 0, 0.232119110529, 0, 0, 0, 0, 0, 0, 0, 0, 0, 0, 0, 0, 0, 0, 0, 0, 0, 0, 0, 0, 0, 0, 0, 0, 0, 0, 0, 0, 0, 0, 0, 0, 0, 0, 0, 0, 0, 0, 0, 0, 0.232119110529, 0, 0, 0.696357331587, 0, 0, 0, 0, 0, 0, 0, 0, 0, 0, 0.464238221058, 0.464238221058, 0, 0, 0, 0, 0, 0]	3.75346	37	intergenic_region	INT_0_3905	sense
+	chrXI	583507	583523	-	TTGCGTTAAATATAAT	1	flanking_window_reference_pA_signal	[0, 0, 0, 0, 0, 0, 0, 0, 0, 0, 0, 0, 0, 0, 0, 0, 0, 0, 0, 0, 0, 0, 0, 0, 0, 0, 0, 0, 0, 0, 0, 0, 0, 0, 0, 0, 0, 0, 0.232119110529, 0, 0, 0, 0.232119110529, 0.232119110529, 0, 0, 0.464238221058, 0.232119110529, 0, 0, 0, 0, 0, 0, 0, 0, 0, 0.232119110529, 0, 0, 0, 0, 0, 0, 0.696357331587, 1.16059555264, 0, 0.232119110529, 0, 0, 0, 0, 0, 0, 0, 0, 0, 0, 0, 0, 0, 0.232119110529, 0, 0.232119110529, 0, 0]	0	35	3UTR	ECM4	sense
+	chrXI	549441	549457	-	GTTCGTACATAATGAC	2	flanking_window_reference_pA_signal	[0, 0, 0, 0.928476442115, 0, 0, 0, 0.232119110529, 0.696357331587, 0, 0, 0, 0, 0, 0, 0, 0, 0, 0, 0, 0, 0, 0, 0, 0.696357331587, 0, 0, 0, 0, 0, 0, 0, 0, 0, 0, 0.232119110529, 0, 0, 0, 0, 0, 0, 0, 0, 0, 0, 0, 0, 0, 0, 0, 0, 0, 0, 0, 0, 0, 0, 0.464238221058, 0, 0, 0, 0.232119110529, 0, 0.232119110529, 0, 0, 0, 0, 0, 0, 0, 0, 0, 0, 0, 0, 0, 0, 0, 0, 0, 0, 0, 0, 0]	3.33641	-27	3UTR	RHO4	sense
-	chrXI	210339	210355	-	GCACGTAGTAAGTGAC	2	flanking_window_reference_pA_signal	[0.696357331587, 0, 0, 0.464238221058, 0, 0, 0, 0, 0, 0, 0, 0, 0, 0, 0, 0, 0, 0, 0, 0, 0, 0, 0, 0, 0, 0, 0, 0, 0, 0, 0, 0, 0, 0, 0, 0, 0, 0, 0, 0, 0, 0, 0, 0, 0, 0, 0, 0, 0, 0, 0, 0, 0, 0, 0, 0, 0, 0, 0, 0, 0, 0, 0, 0, 0, 0, 0, 0, 0, 0, 0, 0, 0, 0, 0, 0, 0, 0, 0, 0, 0, 0, 0, 0, 0, 0]	0	56	XUTs	XUT_11R-82	sense
-	chrXI	554738	554754	-	GGATGTTGTTGCTGAT	2	flanking_window_reference_pA_signal	[0, 0, 0, 0, 0, 0, 0, 0.696357331587, 0, 0.696357331587, 0, 0, 0, 4.17814398952, 0, 0, 0, 0, 0, 0, 0, 0, 0, 0, 0, 0, 0.696357331587, 0, 0, 0, 0.232119110529, 0, 0, 0, 0, 0, 0, 0, 0, 0.232119110529, 0, 0, 0, 0, 0.464238221058, 0.232119110529, 0, 0, 0, 0, 0, 0, 0, 0, 0, 0, 0, 0, 0, 0, 0, 0, 0, 0, 0, 0, 0, 0, 0, 0, 0, 0, 0, 0, 0, 0, 0, 0, 0, 0, 0, 0, 0, 0, 0, 0]	0	43	CUTs	CUT723	sense
+	chrXI	452059	452075	-	ATTCGTCAAATGTGAT	1	flanking_window_reference_pA_signal	[0, 0, 0, 0, 0, 0, 0, 0, 0, 0, 0, 0, 0, 0, 0, 0, 0, 0, 0, 0, 0, 0, 0, 0, 0, 0, 0, 0, 0, 0, 0, 0, 1.16059555264, 0, 0, 0, 0, 0, 2.55331021582, 12.302312858, 0, 3.71390576846, 11.6059555264, 0, 0, 0, 0, 0.232119110529, 0, 0.696357331587, 0, 0, 0, 0, 0, 0, 0, 0, 0, 0, 0, 0, 0, 0, 0, 0, 0, 0, 0, 0, 0, 0, 0, 0, 0, 0, 0, 0, 0, 0, 0, 0, 0, 0, 0, 0]	0.208525	9	3UTR	MEH1	sense
+	chrXI	125610	125626	+	CTTCGTATTTAGTGAT	1	flanking_window_reference_pA_signal	[0, 0, 0, 0, 0, 0, 0, 0, 0, 0, 0, 0.696357331587, 0, 0, 0, 0, 0, 0, 0, 0, 0, 0, 0, 0, 0, 0, 0, 0.232119110529, 0, 0, 0, 0, 0, 0, 0, 0, 0, 0, 0, 0, 0, 0, 0, 0, 0, 0, 0, 0, 0, 0, 0, 0, 0, 0, 0, 0, 0, 0, 0, 0.232119110529, 0.464238221058, 2.78542932635, 0, 0, 0, 15.784099516, 0, 0, 0, 0, 0.232119110529, 0, 0, 0, 0, 1.16059555264, 0, 0, 0, 0, 0.232119110529, 0.232119110529, 0.232119110529, 0.46423822…	3.12788	35	3UTR	SNU114	sense
+	chrXI	48020	48036	+	ATGCGTATTATTTGGT	2	flanking_window_reference_pA_signal	[0, 0, 0, 0, 0, 0, 0, 0, 0, 0, 0, 0, 0, 0, 0.232119110529, 0, 0, 0, 0, 0, 0, 0, 0, 0, 0, 0, 0, 0, 0, 0, 0, 0, 0, 0, 0, 0, 0, 0, 0, 0, 0, 0, 0, 0, 0, 0.696357331587, 0.232119110529, 0, 0.928476442115, 1.39271466317, 0, 1.39271466317, 0, 0.464238221058, 1.16059555264, 0, 0, 0, 0, 0, 0, 0, 0, 0.464238221058, 0, 0, 0, 0, 0, 0, 0, 0, 0.232119110529, 0, 0, 0, 0, 0, 0.464238221058, 0, 0, 0, 0, 0, 0, 0]	0	19	3UTR	CBT1	sense
-	chrXI	53553	53569	+	TTACGTAAAGAATGAC	1	flanking_window_reference_pA_signal	[0.696357331587, 0, 0, 0.232119110529, 0.696357331587, 0, 0, 9.98112175274, 0, 0.232119110529, 0.232119110529, 0.928476442115, 0, 0.232119110529, 0, 0, 0.232119110529, 0.232119110529, 0, 0, 0, 0, 0.232119110529, 0, 0, 0, 0, 0, 0.464238221058, 0, 0, 0, 0, 0, 0, 0, 0, 0, 0, 0, 0, 0, 0, 0, 0, 0, 0, 0, 0, 0, 0, 0, 0.232119110529, 0, 0, 0, 0, 0, 0, 0, 0, 0, 0.232119110529, 4.64238221058, 0, 0, 0, 0, 0…	0	-16	intergenic_region	INT_0_5049	sense
+	chrXI	493732	493748	+	TTACGGCGATAATGCT	2	flanking_window_reference_pA_signal	[0, 0, 0.232119110529, 0, 0, 0, 0, 0, 0, 0, 0, 0, 0, 0, 0, 0, 0, 0, 0.232119110529, 0, 0, 0, 0, 0, 0, 0.232119110529, 0, 0, 0, 0, 0, 0, 0, 0, 0, 0, 1.16059555264, 6.49933509481, 0, 24.6046257161, 0, 0, 0.232119110529, 0.232119110529, 1.16059555264, 15.0877421844, 0, 0, 10.2132408633, 0, 2.08907199476, 0, 2.32119110529, 25.9973403792, 0, 1.39271466317, 0, 0, 0, 0, 0, 1.39271466317, 4.17814398952, …	0.417051	23	3UTR	BCH2	sense
-	chrXI	205393	205409	+	TTTCGTTACTCGCGAC	2	flanking_window_reference_pA_signal	[0.232119110529, 0, 0, 0, 0, 0, 0, 0, 0, 0, 0, 0, 0, 0, 0, 0, 0, 0, 0, 2.08907199476, 0, 0, 2.32119110529, 0, 1.85695288423, 0, 0, 0, 0, 0, 0, 0, 0, 0, 0, 0, 1.39271466317, 2.55331021582, 0.232119110529, 0.232119110529, 5.10662043163, 1.16059555264, 6.96357331587, 48.5128941005, 4.17814398952, 3.48178665793, 29.4791270372, 0, 0.928476442115, 0, 0, 0, 0.232119110529, 0, 0, 0, 0, 0, 0, 0, 0, 0, 0, …	0	13	SUTs	SUT663	sense
-	chrXI	288712	288728	+	ATTCGTTTACAATGAT	1	flanking_window_reference_pA_signal	[0, 0, 0, 0, 0, 0, 0, 0.232119110529, 0.232119110529, 0, 0, 0, 0, 0, 0, 1.16059555264, 0, 0, 1.6248337737, 0.464238221058, 0, 0, 0, 0.232119110529, 0, 0, 0, 0, 0, 0, 0, 0, 0, 0, 0, 0, 0, 0, 0, 0, 0, 0, 0, 0, 0, 0, 0, 0, 0, 0, 0, 0, 0, 0, 0, 0, 0, 0, 0, 0, 0, 0, 0, 0, 0, 0, 0, 0, 0, 0, 0, 0, 0, 0, 0, 0, 0, 0, 0, 0, 0, 0, 0, 0, 0, 0]	0.208525	38	intergenic_region	INT_0_5221	sense
-	chrXI	82768	82784	+	TTCCGTGCGAAGTGAC	1	flanking_window_reference_pA_signal	[0, 1.16059555264, 2.08907199476, 10.9095981949, 0, 0, 0.232119110529, 0, 0, 0, 0, 0.232119110529, 2.55331021582, 0, 0, 0, 0, 0.928476442115, 0, 0, 0, 0, 0, 0.232119110529, 0, 0, 0, 0, 0, 0, 0, 0, 0, 0, 0, 0, 0, 0, 0, 0, 0, 0, 0, 0, 0, 0, 0, 0, 0, 0, 0, 0, 0, 0, 0, 0, 0, 0, 0, 0, 0, 0, 0, 0, 0, 0, 0, 0, 0, 0, 0, 0, 0, 0, 0, 0, 0, 0, 0, 0.232119110529, 0, 0, 0, 0, 0, 0]	0	53	intergenic_region	INT_0_5065	sense
+	chrXI	507756	507772	+	TAAAATTTAATATGAT	2	flanking_window_reference_pA_signal	[0, 0, 0, 0, 0, 0, 0, 0, 0, 0, 0, 0, 0, 0, 0, 0, 0, 0, 0, 0, 0, 0, 0, 0, 0, 0, 0, 0, 0, 0, 0.232119110529, 0, 0, 0, 0, 0, 0, 0, 0, 0, 0, 0, 0, 0, 0, 0, 0, 0.464238221058, 0, 0, 0.696357331587, 0.464238221058, 0, 0.928476442115, 0, 0, 1.16059555264, 5.57085865269, 0, 0, 0, 0, 0.232119110529, 14.1592657423, 0, 0.696357331587, 0, 0, 0.232119110529, 0, 0, 0, 0, 0, 0, 0, 0, 0, 0, 0, 0, 0, 0, 0, 0, 0]	0	33	intergenic_region	INT_0_5386	sense
-	chrXI	182608	182624	+	TTCCTTTTAGCATTAT	2	flanking_window_reference_pA_signal	[0, 0, 4.64238221058, 0, 0, 0, 0, 0, 0, 0.232119110529, 0, 0, 0, 0, 0.464238221058, 0, 0, 0, 0, 1.16059555264, 0, 0, 0, 0, 0, 0, 0.232119110529, 0.232119110529, 0, 0, 0, 0.232119110529, 2.55331021582, 0, 0, 0.232119110529, 1.16059555264, 0, 0, 0, 0, 0, 0.232119110529, 0, 0, 0.464238221058, 0.464238221058, 7.65993064745, 0, 1.39271466317, 2.55331021582, 0, 0.232119110529, 2.32119110529, 0, 0, 0, 0…	0	9	intergenic_region	INT_0_5137	sense
-	chrV	416622	416638	-	TCGCTTGATACGTGTT	2	flanking_window_reference_pA_signal	[0, 0, 0, 0, 0, 0, 0, 0, 0.232119110529, 1.6248337737, 0, 0, 7.65993064745, 0, 3.2496675474, 0, 0.232119110529, 0, 0.928476442115, 0.696357331587, 0, 0, 0, 0.232119110529, 0, 0, 0.928476442115, 0, 0.464238221058, 0, 0, 0, 0, 0.464238221058, 0, 0, 0, 0, 0, 0.464238221058, 0, 0, 0, 0, 0, 0, 0, 0, 0, 0, 0, 0, 0, 0, 0.232119110529, 0, 0, 0.928476442115, 0, 0, 0, 0, 0, 0, 0.232119110529, 0, 0, 0, 0, 0…	0	44	intergenic_region	INT_0_2873	sense
-	chrV	512330	512346	-	TGCCGTTAATAATGAG	1	flanking_window_reference_pA_signal	[5.33873954216, 0, 0, 0, 1.16059555264, 15.3198612949, 0, 2.08907199476, 14.3913848528, 0, 0, 4.17814398952, 5.10662043163, 0, 0.232119110529, 0, 0.696357331587, 12.302312858, 0, 0.232119110529, 6.73145420534, 0, 0.232119110529, 0.232119110529, 0.696357331587, 0, 0, 0, 0, 0, 0.232119110529, 0, 0, 0.232119110529, 0, 0, 0, 0, 0, 0, 0, 0, 0, 0, 0, 0.232119110529, 0, 0, 0.696357331587, 0, 0, 0, 0, 0,…	0	51	intergenic_region	INT_0_2949	sense
-	chrV	90101	90117	-	TAACGTATGGCGTGAC	1	flanking_window_reference_pA_signal	[0.464238221058, 0, 1.6248337737, 0, 0, 0, 0, 0.464238221058, 0.928476442115, 5.10662043163, 0, 1.16059555264, 9.28476442115, 0, 0.232119110529, 0.232119110529, 0.696357331587, 1.85695288423, 0, 0, 0, 0, 0, 0, 0, 0, 0, 0, 0, 0, 0, 0, 0, 0, 0, 0, 0, 0, 0, 0, 0, 0, 0, 0, 0, 0, 0, 0, 0, 0, 0, 0, 0, 0, 0, 0, 0, 0, 0, 0, 0, 0, 0, 0, 0, 0, 0, 0, 0, 0, 0, 0, 0, 0, 0, 0, 0, 0, 0, 0, 0, 0, 0, 0, 0, 0]	0	44	intergenic_region	INT_0_2600	sense
-	chrV	202036	202052	-	CATCGTGATGATTCAT	2	flanking_window_reference_pA_signal	[78.9204975798, 110.488696612, 0, 2.08907199476, 0, 0, 4.41026310005, 45.2632265531, 503.002112516, 0, 2.32119110529, 1.85695288423, 12.9986701896, 2.08907199476, 0.928476442115, 14.3913848528, 71.7248051534, 3.71390576846, 7.89204975798, 173.160856455, 0, 0.696357331587, 0, 0.232119110529, 0.232119110529, 0.232119110529, 0.464238221058, 0, 0, 0, 0, 0, 0, 0, 0, 0, 0, 0, 0, 0, 0, 0, 0.232119110529…	0.625576	48	intergenic_region	INT_0_2694	sense
+	chrV	200967	200983	-	TCTTGTTTTCGAAGAT	2	flanking_window_reference_pA_signal	[0, 0, 0, 0, 0, 0, 0, 0, 0, 0, 0, 0, 0, 0, 0, 0, 0, 0, 0, 0, 0, 0.232119110529, 0, 0, 0, 0, 0, 0, 0, 0.232119110529, 0, 0, 0, 0, 0, 0, 35.2821048004, 0, 0, 0, 0, 0.232119110529, 0, 0, 0.464238221058, 0, 0, 0, 0, 0, 0, 0, 0, 0.232119110529, 0, 0, 0, 0, 1.39271466317, 0, 0, 0.696357331587, 0, 0, 0.696357331587, 0, 0, 0, 0, 0, 0.232119110529, 0, 0, 0, 0, 0, 0, 0, 0.232119110529, 0, 0, 0, 0, 0, 0, 0]	0	6	3UTR	SRB4	sense
+	chrV	167715	167731	-	TATCGTGTAAAATGAT	0	flanking_window_reference_pA_signal	[0, 0, 0, 0, 0, 0, 0, 0, 0, 0, 0, 0, 0, 0, 0, 0, 0, 0, 0, 0, 0, 0, 0, 0, 0.232119110529, 0, 0, 0, 0, 0, 0, 0, 0, 0, 0, 0, 0, 0.696357331587, 0, 0, 0, 0, 0, 0, 0, 0, 0, 0, 0, 0, 0, 0, 0, 0, 0, 0, 0, 0, 0, 0, 0, 0, 0, 0, 0.232119110529, 0, 0, 0, 0, 0, 0, 0, 0, 0, 0, 0, 0, 0, 0, 0, 0, 0, 0, 0, 0, 0]	0	7	XUTs	XUT_5F-75	sense
+	chrV	162525	162541	+	TTGCATTAACAGTGAT	1	flanking_window_reference_pA_signal	[0, 0, 0, 0, 0, 0, 0, 0, 0, 0, 0, 0, 0, 0, 0, 0, 0, 0, 0, 0, 0, 0, 0, 0, 0, 0, 0, 0.232119110529, 0.232119110529, 0, 0, 0.696357331587, 0, 0.464238221058, 0, 0.232119110529, 0, 0, 0, 0, 0, 0, 0, 0, 0, 0, 0, 0, 0, 0, 0, 0, 0.464238221058, 0, 0, 0, 3.94602487899, 12.302312858, 0, 0, 0, 0, 0, 0, 0.696357331587, 0.232119110529, 0, 0, 0, 0, 0, 0, 0, 0, 0, 0.464238221058, 0, 1.16059555264, 5.3387395421…	0.208525	27	3UTR	YND1	sense
-	chrV	343354	343370	+	TGTTGTCGTGCCTGAT	1	flanking_window_reference_pA_signal	[0, 0, 0, 0, 0, 0, 0.696357331587, 0, 0, 0, 0, 0, 0, 0.464238221058, 0, 0, 0, 0, 0.928476442115, 3.2496675474, 0, 0, 0.696357331587, 0.464238221058, 0.232119110529, 0.464238221058, 0.232119110529, 0, 0, 0, 0, 1.39271466317, 2.55331021582, 0, 0.232119110529, 4.17814398952, 0, 0, 0, 0, 0, 0, 0, 0.232119110529, 0, 0, 0.232119110529, 0, 0, 0.464238221058, 0, 0, 0.232119110529, 0, 0, 0, 0, 0, 0, 0, 0,…	0	21	CDS	TSC11	sense
-	chrXII	121216	121232	-	TAGCTTCATTTGTGAT	1	flanking_window_reference_pA_signal	[0, 0, 0, 0.232119110529, 0.232119110529, 0, 0, 0, 0, 0.232119110529, 0.464238221058, 0, 0, 0, 3.48178665793, 21.5870772792, 0, 0.928476442115, 0, 0, 0, 0.232119110529, 0, 0, 0, 0, 0.232119110529, 0, 0.232119110529, 0, 0, 0, 0, 0, 0, 0, 0, 0, 0, 0, 0, 0, 0, 0, 0, 0, 0, 0, 0, 0, 0, 0, 0, 0, 0, 0, 0, 0, 0, 0.232119110529, 0, 0, 0, 0, 0, 0, 0, 0, 0, 0.232119110529, 0, 0, 0, 0, 0, 0, 0, 0, 0, 0, 0.23…	1.04263	41	intergenic_region	INT_0_5577	sense
+	chrXII	380684	380700	-	TATCGTTAAAAGTGAG	1	flanking_window_reference_pA_signal	[0, 0, 0, 0, 0, 0, 0, 0, 0, 0, 0, 0, 0, 0, 0, 0, 0, 0, 0, 0, 0, 0, 0, 0, 0, 0, 0, 0, 0, 0, 0, 0, 0, 0, 0, 0, 0, 0, 0, 0, 0, 0.232119110529, 0.232119110529, 0, 0.696357331587, 0, 0.696357331587, 5.57085865269, 0, 1.6248337737, 0.232119110529, 0, 0.232119110529, 1.6248337737, 0, 0, 3.94602487899, 10.6774790843, 0, 0.232119110529, 0, 0.232119110529, 1.85695288423, 0, 0, 0, 0.928476442115, 0, 0, 0, 0…	0	27	3UTR	MSL5	sense
+	chrXII	537056	537072	+	TACCAAAAAAAATGAT	2	flanking_window_reference_pA_signal	[0, 0, 0, 0, 0, 0, 0, 0, 0, 0, 0, 0, 0, 0, 0, 0, 0.232119110529, 0.696357331587, 0, 0, 0, 0, 0, 0.232119110529, 0, 0, 0, 0, 0, 0, 0, 0, 0.232119110529, 0, 0, 0, 0, 0, 0, 0, 0, 0, 0, 0.928476442115, 0, 0, 0, 1.16059555264, 0, 0, 11.6059555264, 0, 0, 0, 0.928476442115, 0.232119110529, 0, 0, 0.232119110529, 1.85695288423, 0, 0.464238221058, 0.928476442115, 8.58840708957, 0, 0, 0.232119110529, 2.3211…	1.45968	41	3UTR	MMR1	sense
-	chrXII	127388	127404	+	CACCGTGCATAACGAT	2	flanking_window_reference_pA_signal	[0, 0.464238221058, 1.16059555264, 0.464238221058, 0, 0, 0, 0, 0, 0, 0, 0, 0, 0, 0, 0, 0, 0.464238221058, 0, 0, 0, 0, 0, 0, 0, 0, 0, 0, 0, 0, 0, 0, 0, 0, 0, 0, 0, 0, 0, 0, 0, 0, 0, 0, 0, 0, 0, 0, 0, 0, 0, 0, 0, 0, 0, 0, 0, 0, 0, 0, 0, 0, 0, 0, 0, 0, 0, 0, 0, 0, 0, 0, 0, 0, 0, 0, 0, 0, 0, 0, 0, 0, 0, 0, 0, 0]	0	54	intergenic_region	INT_0_5580	sense
-	chrXII	523464	523480	+	TTTCGTAATTCATGAC	1	flanking_window_reference_pA_signal	[9.51688353168, 0, 0, 0, 0.232119110529, 0, 0, 0, 0, 0, 0, 0, 0, 0, 0, 0, 0, 0.232119110529, 0, 0, 0, 0, 0.232119110529, 0, 0, 0, 0, 0, 0.232119110529, 0, 0, 0, 0, 0, 0, 0, 0, 0.232119110529, 0, 0, 0, 0, 0, 0, 0.232119110529, 3.71390576846, 0, 0, 0, 0.232119110529, 2.78542932635, 0, 1.16059555264, 1.6248337737, 0, 0, 0, 0, 0.464238221058, 0, 0, 0, 0, 0, 0, 0, 0, 0, 0, 0, 0, 0, 0, 0.232119110529, …	0	56	intergenic_region	INT_0_5869	sense
+	chrXII	505901	505917	+	ACTCGTAACATATGAT	1	flanking_window_reference_pA_signal	[0, 0, 0, 0, 0, 0, 0, 0, 0, 0, 0, 0, 0, 0, 0, 0, 0, 0, 0, 0, 0, 0, 0.232119110529, 0, 0, 0, 0, 0, 0.464238221058, 1.16059555264, 0, 0, 0, 0, 0, 3.2496675474, 0, 0, 0, 0, 0, 0, 0, 0.232119110529, 0, 0, 0, 0, 0, 0, 0, 0, 0, 0, 0, 0, 2.32119110529, 0, 0.232119110529, 0, 1.6248337737, 0, 0, 0, 0, 0, 0, 0, 0, 0, 0, 0, 0, 0, 0, 0, 0, 0, 0, 0, 0, 0, 0, 0, 0, 0]	0.625576	5	3UTR	IDP2	sense
-	chrXII	990620	990636	+	TGTCGTTGTGCGTGAT	0	flanking_window_reference_pA_signal	[0, 0, 0.696357331587, 0, 0, 0, 0, 0, 0, 0, 0, 0, 0, 0, 0, 0, 0, 0.464238221058, 0, 0, 0, 0.696357331587, 6.26721598428, 0, 2.55331021582, 0, 0.232119110529, 6.96357331587, 0, 0, 0, 13.9271466317, 0, 0, 0, 0, 0, 0, 0, 0, 0, 0, 0, 0, 0, 0, 0, 0, 0, 0, 0, 0, 0, 0.464238221058, 0, 0, 0, 0.232119110529, 0, 0, 0.696357331587, 0, 0, 0, 0, 0, 0, 0, 0, 0, 0, 0, 0, 0, 0, 0, 0, 0, 0, 0, 0, 0, 0, 0, 0, 0]	0	25	CDS	YLR428C	sense

## Sheet: Abf1p_sites_passive_RNA_seq
cluster peak strand	cluster peak chromosome	motif start	motif end	motif_strand	motif_sequence	mismatches from consensus	category	criteria for calling site	total cluster signal	distance from motif boundary to cluster peak (bp)	type of region	gene name	gene strand
+	chrIX	251222	251238	+	TGTCGTTTCAAGTGAC	1	flanking_reference_RNA_seq_expression_values	5.32246	3.78409	N/A	CDS	VHR1	sense
-	chrX	284080	284096	-	TATAATGAGCAGTGAT	2	flanking_reference_RNA_seq_expression_values	0	6.55293	N/A	CDS	ARP4	sense
-	chrX	690708	690724	-	GTACGGGTGTGTTGAT	2	flanking_reference_RNA_seq_expression_values	0	1.33827	N/A	3UTR	INT_0_4980	antisense
-	chrX	545317	545333	+	ATGCGTGCAAAATGAT	1	flanking_reference_RNA_seq_expression_values	0.38748	1.52286	N/A	5UTR	APS2	sense
-	chrX	291886	291902	+	CGCCGTTCAAAGTGCT	2	flanking_reference_RNA_seq_expression_values	1.08884	12.7828	N/A	CDS	PRY3	sense
-	chrII	128968	128984	-	ATCCGTAAGAGATGAT	1	flanking_reference_RNA_seq_expression_values	0.0568884	6.82981	N/A	CDS	EDE1	sense
-	chrII	216541	216557	-	CTTCGTAGAAAGTGAC	2	flanking_reference_RNA_seq_expression_values	0	8.02965	N/A	3UTR	LDB7	sense
-	chrII	615255	615271	+	CACCGTCAAGTGCGAT	2	flanking_reference_RNA_seq_expression_values	0.0151181	5.44539	N/A	CDS	YBR196C-B	sense
-	chrVI	44605	44621	+	TTTCGTGTCTCATGAC	1	flanking_reference_RNA_seq_expression_values	0	1.29213	N/A	3UTR	OTU1	sense
+	chrVI	192487	192503	+	ATTCGTTCACTATGAT	1	flanking_reference_RNA_seq_expression_values	2.25327	1.8459	N/A	5UTR	INT_0_3127	sense
-	chrI	33075	33091	+	GGCCGTGCGGGGTGAG	2	flanking_reference_RNA_seq_expression_values	0.292002	1.06139	N/A	SUTs	XUT_1R-18	sense
+	chrXV	970110	970126	-	TGTCGTGATAAACGAT	1	flanking_reference_RNA_seq_expression_values	2.37381	2.12278	N/A	XUTs	XUT_15F-436	sense
-	chrXV	201929	201945	-	CCTCGTTGGTAGTGAT	1	flanking_reference_RNA_seq_expression_values	0.0290406	5.81457	N/A	3UTR	RTG1	sense
-	chrXV	823695	823711	-	TAGCGCCGGAAGTGAT	1	flanking_reference_RNA_seq_expression_values	0	4.29171	N/A	CDS	HRK1	sense
+	chrXV	909801	909817	-	TATCGTAGGCAGTGAC	1	flanking_reference_RNA_seq_expression_values	19.0553	16.3823	N/A	CDS	FAA1	sense
-	chrXV	440380	440396	+	CCCCGTTGATCATGAT	1	flanking_reference_RNA_seq_expression_values	0	2.95343	N/A	CDS	YOR059C	sense
+	chrXIV	340174	340190	+	ACACGTATTGAACGAT	2	flanking_reference_RNA_seq_expression_values	5.54405	4.84548	N/A	CDS	PGA1	sense
+	chrXIV	624512	624528	+	TGTCGTTGAATACGAT	1	flanking_reference_RNA_seq_expression_values	17.3331	15.1364	N/A	CDS	HRB1	sense
+	chrXIV	289621	289637	+	GCTCGTATATTGTGAT	1	flanking_reference_RNA_seq_expression_values	8.76801	7.29129	N/A	CDS	UBP10	sense
-	chrXIV	317897	317913	+	TTACCCTGCATGTGAT	2	flanking_reference_RNA_seq_expression_values	0	1.8459	N/A	3UTR	PSD1	sense
-	chrXIV	167954	167970	+	TTTCGTCTATCATGAC	1	flanking_reference_RNA_seq_expression_values	0	1.98434	N/A	3UTR	INT_0_7080	antisense
-	chrXIII	413038	413054	-	TGACGACTTCTTTGAT	1	flanking_reference_RNA_seq_expression_values	0	1.43057	N/A	CDS	YMR074C	sense
+	chrXIII	245914	245930	-	TGTCGTTTTTAACGAT	1	flanking_reference_RNA_seq_expression_values	4.16679	3.5995	N/A	CDS	UBX2	sense
-	chrXIII	127633	127649	-	TACCGTAATTGGTGAT	0	flanking_reference_RNA_seq_expression_values	0	3.96868	N/A	CDS	TCB3	sense
+	chrXIII	244003	244019	+	TGCCGTTCATAGTGAG	1	flanking_reference_RNA_seq_expression_values	6.97383	4.56859	N/A	CDS	TRM9	sense
-	chrXIII	590162	590178	+	TTGCTCCCTTCGTGAT	2	flanking_reference_RNA_seq_expression_values	0	1.24598	N/A	CDS	PAH1	sense
-	chrXIII	490848	490864	+	CCTCGTACTCAATGAT	1	flanking_reference_RNA_seq_expression_values	0	6.78367	N/A	CDS	HFD1	sense
-	chrXIII	29230	29246	+	GACCGTAATCAGTGAC	2	flanking_reference_RNA_seq_expression_values	0	7.33744	N/A	CDS	NDI1	sense
-	chrXIII	450188	450204	+	TATCGTGTATAACGGT	2	flanking_reference_RNA_seq_expression_values	0	4.75318	N/A	CDS	NPL6	sense
-	chrIV	1163466	1163482	-	TATGGTCTGCTGTTAT	2	flanking_reference_RNA_seq_expression_values	0.0035806	58.4688	N/A	CDS	HXT3	sense
-	chrIV	787348	787364	+	TTCCGTTAGTTGTGAT	0	flanking_reference_RNA_seq_expression_values	0	1.79975	N/A	CDS	SEC5	sense
+	chrIV	242160	242176	+	TTACGTACAGAATGAC	1	flanking_reference_RNA_seq_expression_values	5.77519	3.73794	N/A	3UTR	SNA4	sense
-	chrVIII	498569	498585	-	CGCCGTATAGAATGAT	1	flanking_reference_RNA_seq_expression_values	0	3.92253	N/A	CDS	AIM46	sense
+	chrVIII	181784	181800	-	TGGCGTAGATAAGCAT	2	flanking_reference_RNA_seq_expression_values	2.34158	1.8459	N/A	CDS	BRL1	sense
+	chrVIII	491722	491738	+	TTCCGTCATCTCGGTT	2	flanking_reference_RNA_seq_expression_values	4.26744	2.26122	N/A	CDS	NVJ1	sense
+	chrXVI	498724	498740	+	TAGAGGTAAGCCTGAT	2	flanking_reference_RNA_seq_expression_values	58.8797	46.4243	N/A	CDS	ERG10	sense
-	chrIII	103490	103506	-	TATCGTCGGAAGTGAT	0	flanking_reference_RNA_seq_expression_values	0.0314281	4.33786	N/A	3UTR	SGF29	sense
-	chrIII	164278	164294	+	TAGAGTCTCAGTTGCT	2	flanking_reference_RNA_seq_expression_values	0	5.49154	N/A	CDS	YCR025C	sense
+	chrIII	258749	258765	+	TACCGTACCAAATGAC	1	flanking_reference_RNA_seq_expression_values	1.41744	1.01524	N/A	5UTR	AHC2	sense
-	chrIII	223404	223420	+	TCCCGTCGCATGTGAT	0	flanking_reference_RNA_seq_expression_values	0	1.89204	N/A	3UTR	YIH1	sense
+	chrIII	216488	216504	+	CCTCGTGAGTAGTGAC	2	flanking_reference_RNA_seq_expression_values	3.61223	1.29213	N/A	3UTR	RSC6	sense
+	chrVII	840511	840527	-	TCCCGTAAAGTATGAT	0	flanking_reference_RNA_seq_expression_values	3.00276	2.44581	N/A	CDS	PSD2	sense
+	chrVII	506798	506814	-	TATCGTGGTTGCTGGT	1	flanking_reference_RNA_seq_expression_values	1.70228	1.15368	N/A	CDS	PRP18	sense
+	chrVII	1027116	1027132	-	GTACGTTTTTAGTGAT	1	flanking_reference_RNA_seq_expression_values	1.39516	1.10754	N/A	5UTR	INT_0_3979	antisense
-	chrVII	190225	190241	-	AACCGTAGAAGATGAT	1	flanking_reference_RNA_seq_expression_values	0.039783	2.49196	N/A	CDS	PMR1	sense
-	chrVII	978221	978237	-	TATCGTAAGATGTGAC	1	flanking_reference_RNA_seq_expression_values	0	8.67571	N/A	CDS	LSC2	sense
+	chrVII	840077	840093	+	GGCCGTTCGTAGTGAG	2	flanking_reference_RNA_seq_expression_values	3.01032	2.7227	N/A	CDS	PSD2	sense
+	chrXI	525184	525200	-	CGCCGTGGGGGATGAT	1	flanking_reference_RNA_seq_expression_values	3.27448	1.43057	N/A	intergenic_region	INT_0_5405	sense
+	chrXI	263197	263213	-	CCTCGTAAGTAGCGAT	2	flanking_reference_RNA_seq_expression_values	2.8313	1.15368	N/A	3UTR	YJU3	sense
-	chrXI	93449	93465	-	GTACGTATAAAACGAT	2	flanking_reference_RNA_seq_expression_values	0	1.89204	N/A	intron	MTR2	sense
+	chrXI	446525	446541	+	TGGCGAAGATCTTGAC	2	flanking_reference_RNA_seq_expression_values	4.59604	3.78409	N/A	CDS	OSH6	sense
-	chrV	422077	422093	-	CATCGTAGAAAATGAT	1	flanking_reference_RNA_seq_expression_values	0.269722	13.0597	N/A	CDS	YER130C	sense
-	chrXII	921521	921537	-	CGACGTTTCCAGTAAT	2	flanking_reference_RNA_seq_expression_values	0	7.93735	N/A	CDS	BDF1	sense
+	chrXII	932906	932922	-	GATCGTACAAAATTAT	2	flanking_reference_RNA_seq_expression_values	4.79217	3.5995	N/A	5UTR	YLR407W	sense
+	chrXII	103654	103670	-	GACCCTACTATCTGAT	2	flanking_reference_RNA_seq_expression_values	6.47217	5.49154	N/A	CDS	SPA2	sense
+	chrXII	504174	504190	-	TGCCGTCGTAAGTGAC	1	flanking_reference_RNA_seq_expression_values	1.45364	1.24598	N/A	CDS	YLR173W	sense
+	chrXII	399471	399487	-	TAACGTATTCCATGCA	2	flanking_reference_RNA_seq_expression_values	2.05515	1.56901	N/A	3UTR	DCN1	sense
+	chrXII	811279	811295	+	TGTCGTCTGGGATGAT	0	flanking_reference_RNA_seq_expression_values	15.6877	13.4289	N/A	CDS	FKS1	sense
+	chrXII	161445	161461	+	CAGCGTATAACACGAT	2	flanking_reference_RNA_seq_expression_values	5.16652	2.53811	N/A	CDS	SSL1	sense
-	chrXII	65737	65753	+	GCGCGAATAAGATGAT	2	flanking_reference_RNA_seq_expression_values	0	2.26122	N/A	3UTR	ENT4	sense
